# Supplementary material for: In silico analysis of the transcriptional regulatory logic of neuronal identity specification throughout the C. elegans nervous system
Source: eLife journal article supplement (doi:10.7554/elife.64906), 2021-06-22

Figure 2 – Figure Supplement 1

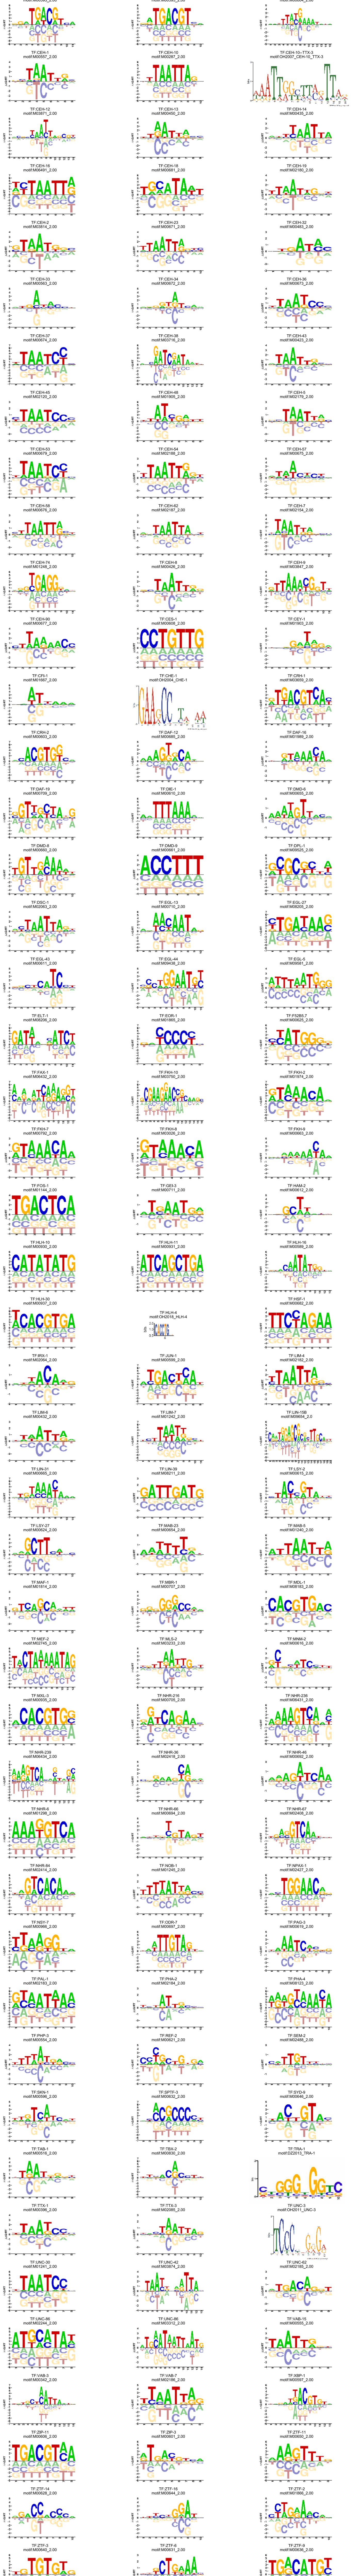

Supplement: fig2-data1 [file elife-64906-fig2-data1-v1.pdf]
