# Supplementary material for: In silico analysis of the transcriptional regulatory logic of neuronal identity specification throughout the C. elegans nervous system
Source: eLife. 2021 Jun 24;10:e64906. doi: 10.7554/eLife.64906 (PMC8225391; doi:10.7554/eLife.64906)
Supplement: Supplementary file 2. — (A) Results from transcription factor (TF) with genetic loss-of-function data including results that were further validated in vivo. (B) Results for four, well-characterized terminal selectors. (C) Nervous system-wide motif analysis results from single cell differential gene expression data. (D) Cofactor results from motif analysis of single cell differential gene expression data. (E) All predicted coordinated regulators (candidate terminal selectors) by neuron class. (F) Candidate target neuron class gene batteries by coordinated regulatory TF. (G) All co-occuring coordinated signatures (candidate terminal selector co-regulators). [file elife-64906-supp2.xlsx]

## Sheet: Supp.Table.2A.TSs_w_genetic_dat
Table S2. Motif analysis results from single cell differential expression data. 2A. Results from TF with genetic loss-of-function data including results that were further validated in vivo. 2B. Results for four, well-characterized terminal selectors. 2C. Nervous system wide motif analysis results from single cell differential gene expression data. 2D. Cofactor results from motif analysis of singl…
TF	neuron_class	motif_ID	TF dep. Activated Markers	References	Motif signature	differentially expressed gene count	observed genes with a motif match	expected genes with a motif match	fold change enrichrichment	hypergeometric test p value (corrected)	Wilcoxon rank sums test p value (corrected)
unc-86	BDU	M03312_2.00	flp-10, nlp-1, nlp-15,ceh-14, ahr-1, inx-7, ser-2,slt-1, zig-3, hid-1, cam-1b, aex-5	Gordon et al 2015,	Coordinated Regulator	259	228	178.557	1.2769	1.54e-12	1.2e-27
unc-86	PVR	M03312_2.00	eat-4, flp-10,flp-20, dkf-2b	Serrano-Saiz et al 2013	Coordinated Regulator	264	230	182.004	1.26371	1.36e-11	2.12e-13
unc-86	AVM	M03312_2.00	mec-3, mec-4, mec-7, eat-4	Xue et al 1992, Xue et al 1993, Duggan et al 1998, Kim and LI 2004,Serrano-Saiz et al 2013	Coordinated Regulator	248	215	170.974	1.2575	1.69e-10	2.62e-20
unc-86	URB	M03312_2.00	unc-17	Zhang et al 2014	Coordinated Regulator	271	232	186.83	1.24177	4.4e-10	1.66e-20
unc-86	PLM	M03312_2.00	mec-3, mec-4,mec-7, eat-4	Xue et al 1992, Xue et al 1993, Duggan et al 1998, Kim and LI 2004, Serrano-Saiz et al 2013	Coordinated Regulator	341	290	235.089	1.23358	1.51e-11	2.84e-20
unc-86	ALM	M03312_2.00	mec-3, mec-7, mec-4, mec-17, cam-1b, aex-6, eat-4	Xue et al 1992, Xue et al 1993, Duggan et al 1998, Kim and LI 2004, Gordon et al 2015, Serrano-Saiz et al 2013	Coordinated Regulator	295	247	203.376	1.2145	9.77e-09	1.34e-18
ceh-14	AIM	M00435_2.00			Coordinated Regulator	240	199	137.868	1.44341	1.69e-16	1.89e-20
unc-86	FLP	M03312_2.00	mec-3, eat-4	Xue et al 1992, Serrano-Saiz et al 2013	Coordinated Regulator	161	133	110.995	1.19825	8.74e-05	4.88e-12
unc-86	HSN	M03312_2.00	tph-1, cat-1, cat-4, bas-1, kcc-2, lgc-55, ida-1, flp-19, egl-46, hlh-3, sem-4, ast-1	Lloret-Fernandez et al. 2018, Sze et al. (2002)	Coordinated Regulator	698	575	481.208	1.19491	1.14e-15	3.21e-31
unc-86	PVD	M03312_2.00	flp-4, mec-3, des-2, eat-4	Kim and LI 2004, Xue et al 1992, Treinin et al. 1998	Coordinated Regulator	191	157	131.677	1.19231	3.53e-05	2.43e-17
unc-86	PVM	M03312_2.00	mec-3, mec-4, mec-7	Xue et al 1992, Xue et al 1993, Duggan et al 1998, Kim and LI 2004	Coordinated Regulator	277	227	190.967	1.18869	1.12e-06	1.3e-16
unc-86	URA	M03312_2.00	cfi-1, unc-17, cho-1	Shaham and Bargmann 2002, Zhang et al 2014	Coordinated Regulator	170	139	117.2	1.18601	0.000156885	2.81e-13
ceh-14	ALA	M00435_2.00			Coordinated Regulator	163	133	93.6354	1.4204	1.47e-10	3.98e-11
unc-86	URX	M03312_2.00	unc-17, cho-1, gcy-32 , ahr-1, flp-8	Periera. 2015, Hongtao Qin Jo Anne Powell-Coffman 2004, Rohrig et al 2000,Qin 2004, Li and Kim 2004, This study	Coordinated Regulator	353	284	243.362	1.16699	1.23e-06	2.03e-21
unc-86	RIH	M03312_2.00	unc-17,cha-1, cho-1, cat-1, tph-1	Periera et al 2015, 8Sze et al. (2002).	Coordinated Regulator	297	232	204.755	1.13306	0.000358149	1.45e-18
egl-13	BAG	M00710_2.00		Gramstrup Petersen et al. PLoS Genetics 2013	Coordinated Regulator	263	204	153.397	1.32988	1.06e-10	3.06e-15
ceh-14	PVR	M00435_2.00		Serrano-Saiz et al 2013	Coordinated Regulator	264	201	151.655	1.32538	4.19e-10	1.41e-12
fax-1	AVK	M06432_2.00	flp-1, ncs-1	Wightman et al 2005.	Coordinated Regulator	104	79	64.9909	1.21555	0.00307266	0.000136806
egl-13	PQR	M00710_2.00	gcy-32, gcy-36, tax-4, glb-5	Feng et al 2013	Coordinated Regulator	246	186	143.482	1.29633	2.14e-08	0.000223756
unc-86	IL2	M03312_2.00	lag-2, cho-1, unc-17, gcy-19, unc-5, klp-6, cfi-1	Zhang et al 2014, Shaham and Bargmann 2002	Coordinated Regulator	735	549	506.716	1.08345	0.000393488	4.74e-21
ceh-14	PVC	M00435_2.00	unc-17,cha-1, cho-1, nmr-1, glr-1	Periera et al 2015	Coordinated Regulator	427	317	245.29	1.29235	1.02e-12	2.15e-25
unc-86	AIZ	M03312_2.00	eat-4, ser-2, kal-1, lin-11	Serrano-Saiz et al 2013, Rohrig et al 2000	Coordinated Regulator	1144	849	788.685	1.07648	5.07e-05	2.71e-29
ceh-10--ttx-3	AIY	OH2007_CEH-10_TTX-3	ttx-3, sra-11, ser-2, Kal-1, unc-17, hen-1, ceh-10, ceh-23, lin-14, ckr-2, C16B8.4, K04G2.2, inx-18, F17C11.2, npr-35, ZK57.1, idb-1	Altun-Gultekin, Z & Hobert, O. (2001), Wenick and Hobert (2004)	Coordinated Regulator	177	131	91.583	1.4304	2.65e-09	1.49e-21
ceh-14	PHC	M00435_2.00	ida-1, dop-1, sra-12, eat-4	Serrano-Saiz et al 2013, Serrano-Saiz et al 2016	Coordinated Regulator	109	80	62.6151	1.27765	0.000542722	0.00263772
pag-3	BDU	M00619_2.00	flp-10, nlp-1, nlp-15,ceh-14, ahr-1, inx-7, ser-2,slt-1, zig-3, hid-1	*Gordon et al 2015,	Coordinated Regulator	259	189	127.734	1.47964	2.97e-14	2.09e-18
ceh-14	PVN	M00435_2.00	unc-17,cha-1, cho-1	Periera et al 2015	Coordinated Regulator	122	89	70.0829	1.26992	0.00038075	1.33e-08
unc-86	NSM	M03312_2.00	cat-1,nlp-13,scd-2, bas-1, ptps-1, tph-1, mgl-3, dop-3	Zhang et al 2014, Sze et al. (2002).	Coordinated Regulator	953	686	657.008	1.04413	0.0230905	3.55e-20
cfi-1	PVC	M01667_2.00	nmr-1, glr-1	Shaham S, Bargmann CI.2002, Zhang et al. 2014, this study	Coordinated Regulator	427	307	246.884	1.2435	2.31e-09	2.35e-30
cfi-1	URA	M01667_2.00	glr-4, unc-17, cho-1	Chou et al. 2001, Shaham S, Bargmann 2002, Zhang et al 2014	Coordinated Regulator	170	122	98.291	1.24121	0.000163192	1.7e-12
egl-13	AQR	M00710_2.00	gcy-32, gcy-36, tax-4, glb-5	Feng et al 2013, check 88. Gramstrup Petersen J, Rojo Romanos T, Juozaityte V, Redo Riveiro A, Hums I, TraunmuÃàller L, Zimmer M, Pocock R. EGL-13/SoxD specifies distinct O2 and CO2 sensory neuron fates in Caenorhabditis elegans. PLoS Genet 2013, 9:e1003511. or 89. Qin H, Powell-Coffman JA. The Caenorhabditis elegans aryl hydrocarbon receptor, AHR-1, regulates neuronal development. Dev Biol 2004,…	Coordinated Regulator	234	167	136.483	1.2236	3.56e-05	1.02e-06
egl-13	URX	M00710_2.00			Coordinated Regulator	353	247	205.89	1.19967	6.05e-06	6.45e-09
hlh-4	ADL	OH2018_HLH-4	sra-13, sre-43,srh-79, srh-127,srh-279,srz-102,srh-220,srh-234,sri-12,srxa-14,srz-104,srz-24,eat-4,flp-21,flp-4,nlp-10,nlp-7,ncx-6,ncx-7,osm-9,che-7,unc-7, inx-18	Masoudi et al. 2018	Coordinated Regulator	595	405	243.105	1.66595	4.49e-40	2.18e-21
ceh-14	AFD	M00435_2.00	eat-4, gcy-8, nlp-21, tax-2	Serrano-Saiz et al 2013, Kagoshima et al 2015	Coordinated Regulator	370	251	212.547	1.18092	3.58e-05	1.48e-13
unc-3	AS	OH2011_UNC-3	unc-17, cho-1, ace-2, acr-14, acr-15, tig-2, nlp-21,F55C12.4	Kratsios et al 2012 (table 1)	Coordinated Regulator	230	153	46.7806	3.27058	4.59e-50	2.01e-31
ceh-14	DVC	M00435_2.00	ida-1, dop-1, sra-12, eat-4	Serrano-Saiz et al 2013	Coordinated Regulator	196	130	112.592	1.15461	0.00807931	2.09e-08
che-1	ASE	OH2004_CHE-1	gcy-5,gcy-6, gcy-7, gcy-14, gcy-20, srd-33, R13H7.2, eat-4, tax-2, ceh-36, die-1, ceh-23, lsy-6, cog-1, che-1, lim-6, fozi-1, flp-4, flp-6, flp-13, hen-1, npr-28, + cillium markers	Uchida et al. 2003, Etchberger et al. 2007, Serrano-Saiz et al 2013	Coordinated Regulator	336	220	134.273	1.63845	1.99e-20	1.07e-26
unc-3	SAB	OH2011_UNC-3	cho-1, unc-17, glr-4, glr-5, del-1, exp-1, unc-8, madd-4	Periera et al 2015, Kratsios et al. 2015.	Coordinated Regulator	147	96	29.8989	3.21082	1e-30	1.49e-18
odr-7	AWA	M00697_2.00	odr-10, odr-7	Sengupta, Piali, Joseph H. Chou, and Cornelia I. Bargmann. "odr-10 encodes a seven transmembrane domain olfactory receptor required for responses to the odorant diacetyl." Cell 84.6 (1996): 899-909., need ref for odr-7: odr-7: Colosimo ME, Tran S, Sengupta P. The divergent orphan nuclear receptor ODR-7 regulates olfactory neuron gene expression via multiple mechanisms in Caenorhabditis elegans. G…	Coordinated Regulator	386	245	192.846	1.27044	1.04e-07	2.04e-08
pag-3	PVQ	M00619_2.00	sra-6, dop-1	Cameron S, Clark SG, McDermott JB, Aamodt E, Horvitz HR. PAG_3, a Zn_finger transcription factor, determines neuroblast fate in C. elegans . Development 2002, 129:1763‚Äì1774., this study	Coordinated Regulator	163	103	80.3887	1.28128	0.000337737	4.78e-08
unc-3	VA	OH2011_UNC-3	unc-17, cho-1, ace-2, acr-2, acr-15, trp-1, nca-1, unc-8, del-1, inx-12, dbl-1, tig-2, nlp-21,F39B2.8, unc-4, mig-13, flp-18	Kratsios et al 2017, Kratsios et al 2011 , Prasad et al 1998.	Coordinated Regulator	366	231	74.4422	3.10308	2.3e-69	2.05e-35
cfi-1	IL2	M01667_2.00	odr-2 , lag-2, cho-1, unc-17, unc-5, klp-6 , gcy-19	Shaham S, Bargmann CI.2002, Zhang et al. 2014	Coordinated Regulator	735	462	424.964	1.08715	0.00329375	4.65e-12
ceh-37	BAG	M00674_2.00	eat-4	Serrano-Saiz et al 2013	Coordinated Regulator	263	159	69.2773	2.29512	4.57e-30	1.11e-11
ceh-10	AIY	M00287_2.00	ttx-3	Altun-Gultekin, Z & Hobert, O. (2001) A regulatory cascade of three homeobox genes, ceh-10, ttx-3, and ceh-23, controls cell fate specification of a defined interneuron class in C. elegans	Coordinated Regulator	177	104	67.7557	1.53493	5.77e-08	2.98e-05
unc-3	PDA	OH2011_UNC-3	unc-17,cha-1, cho-1 ,exp-1, ace-3, ace-4, cog-1	Periera et al 2015	Coordinated Regulator	124	71	25.2209	2.81513	1.61e-18	2.02e-08
ttx-3	AIA	M02085_2.00	mgl-1, ins-1, cho-1, glr-2, flp-2, gcy-28d, scd-2	Zhang et al 2014.	Coordinated Regulator	89	49	22.1149	2.2157	2.96e-09	5.24e-05
unc-42	SMD	M03874_2.00	unc-17,cha-1, cho-1	Periera et al 2015, this study (unc-42 binding site deletion in cho-1 promoter)	Coordinated Regulator	402	218	121.516	1.794	7.47e-23	3.52e-07
unc-42	SAA	M03874_2.00	unc-3 (partial), flp-7, flp-10, glr-4, glr-5, acr-2, lad-2, rig-3, rig-5, rig-6		Coordinated Regulator	80	43	24.1823	1.77816	1.61e-05	0.0269882
unc-42	AVK	M03874_2.00	flp-1, ncs-1, fax-1	Wightman et al 2005.	Coordinated Regulator	104	54	31.437	1.71772	5.4e-06	1.57e-08
ceh-36	AWC	M00673_2.00	eat-4, str-2, srx-3, odr-1, ceh-36	Serrano-Saiz et al 2013, Sagasti et al 1999, Alqadah et al. (2015)	Coordinated Regulator	433	217	100.654	2.1559	4.57e-33	9.14e-08
lim-4	AWB	M02182_2.00	unc-17,cha-1, cho-1, srsx-3,str-1, lim-4	Periera et al 2015, Alqadah et al 2015; Sagasti et al 1999.	Coordinated Regulator	230	115	80.7415	1.4243	4.05e-06	0.0113483
ceh-43	ADE	M00423_2.00			Coordinated Regulator	260	128	94.4819	1.35476	2.1e-05	0.000186916
unc-30	PVP	M01241_2.00	unc-17,cha-1, cho-1, odr-2	Periera et al 2015, 4Hutter (2003).	Coordinated Regulator	180	88	45.7928	1.9217	3.6e-11	0.022988
lim-4	RID	M02182_2.00			Coordinated Regulator	258	126	90.5709	1.39118	6.25e-06	5.39e-10
ttx-1	AFD	M00396_2.00	eat-4, gcy-8, gcy-18, nlp-21, ntc-1, cng-3, tax-2	Serrano-Saiz et al 2013, Kagoshima et al 2015	Coordinated Regulator	370	180	76.9682	2.33863	1.02e-31	2.02e-06
unc-86	PHC	M02244_2.00	eat-4	Periera et al 2015,Serrano-Saiz et al 2013	Coordinated Regulator	109	53	31.4079	1.68747	1.58e-05	0.00400351
ttx-3	AIY	M02085_2.00	ttx-3, sra-11, ser-2, Kal-1, unc-17, hen-1, ceh-10, ceh-23, lin-14, ckr-2, C16B8.4, K04G2.2, inx-18, F17C11.2, npr-35, ZK57.1, idb-1	Altun-Gultekin, Z & Hobert, O. (2001), Wenick and Hobert (2004)	Coordinated Regulator	177	86	43.9813	1.95537	2.5e-11	0.00775015
unc-3	DA	OH2011_UNC-3	unc-17, cho-1, ace-2, acr-2, acr-14, acr-15, trp-1, nca-1, unc-8, dbl-1, tig-2, nlp-21, unc-129, F39B2.8, tsp-7, rig-4, F29G6.2, F55C12.4, unc-4, itr-1, glr-4, mig-13	Kratsios et al 2017, Kratsios et al 2011 , Prasad et al 1998.	Coordinated Regulator	901	437	183.258	2.38462	1.74e-80	2.54e-48
ceh-36	ASE	M00673_2.00	eat-4	Serrano-Saiz et al 2013, ref 64 and 91 in hobert et al.	Coordinated Regulator	336	162	78.1057	2.07411	9.63e-23	8.41e-09
lim-4	SMB	M02182_2.00	unc-17,cha-1, cho-1 + markers from ref 3	Periera et al 2015, 3Kim et al. (2015), this study (lim-4 binding site deletion in cho-1 promoter)	Coordinated Regulator	534	253	187.461	1.34962	6.19e-09	6.64e-14
elt-1	VD_DD	M08206_2.00	unc-47, unc-46, unc-25	Gendrel et al 2016. (ceh-10 not expressed at L4 --check molly's most recent HB data‚Ä¶)	Coordinated Regulator	170	79	55.1607	1.43218	0.000136632	3.59e-06
ceh-43	CEP	M00423_2.00			Coordinated Regulator	291	134	105.747	1.26717	0.000533616	3.42e-06
ceh-8	RIA	M00426_2.00	eat-4	Reilly et al. 2020 (in review Science)	Coordinated Regulator	440	201	133.266	1.50827	1.84e-11	4.08e-06
unc-3	PDB	OH2011_UNC-3	unc-17,cha-1, cho-1	Periera et al 2015	Coordinated Regulator	535	238	108.816	2.18718	1.31e-35	2.82e-24
nhr-67	RIS	M02408_2.00			Coordinated Regulator	173	76	52.1996	1.45595	0.000127519	0.0428472
nhr-67	AVL	M02408_2.00			Coordinated Regulator	344	151	103.796	1.45478	9.3e-08	0.00164949
ceh-43	PDE	M00423_2.00			Coordinated Regulator	313	133	113.742	1.16932	0.0162799	0.00239442
unc-42	RMD	M03874_2.00	unc-17,cha-1, cho-1, glr-1, mgl-1	Periera et al 2015, Baran et al. (1999)	Coordinated Regulator	153	65	46.2487	1.40544	0.00112503	0.00335223
ceh-37	ASG	M00674_2.00	eat-4	Serrano-Saiz et al 2013	Coordinated Regulator	558	228	146.984	1.55119	1.47e-13	1.12e-08
unc-3	DB	OH2011_UNC-3	unc-17, cho-1, ace-2, acr-2, acr-5, acr-14, acr-15,acr-16, trp-1, nca-1, unc-8, dbl-1, tig-2, nlp-21, unc-129, F39B2.8,F29G6.2, F55C12.4, vab-7	Kratsios et al 2011 , Prasad et al 1998.	Coordinated Regulator	1280	523	260.344	2.00888	5.08e-65	6.4e-48
lim-6	AVL	M00432_2.00			Coordinated Regulator	344	138	90.22	1.52959	2.57e-08	1.6e-06
unc-3	PVN	OH2011_UNC-3	unc-17,cha-1	Periera et al 2015	Coordinated Regulator	122	48	24.8141	1.93439	2.09e-06	7.06e-07
lim-6	RIS	M00432_2.00			Coordinated Regulator	173	68	45.3723	1.49871	0.000162091	0.0103584
unc-42	ASH	M03874_2.00	gpa-11, gpa-13, gpa-14, gpa-15, flp-21, eat-4, SRA-6, SRB-6, osm-10, sri-14, srd-33, srd-44, srd-10, hlh-2, ceh-23, nlp-15	Serrano-Saiz et al 2013, Baran et al. (1999), Wood (2019)	Coordinated Regulator	451	174	136.328	1.27633	0.000118891	4.3e-06
unc-42	RMF	M03874_2.00	unc-17, rig-5	?	Coordinated Regulator	198	76	59.8513	1.26981	0.0101547	1.67e-06
ttx-3	ASK	M02085_2.00	eat-4, gcy-27, nlp-14, flp-13	Serrano-Saiz et al 2013	Coordinated Regulator	545	202	135.423	1.49163	3.09e-10	0.000151739
unc-3	VB	OH2011_UNC-3	unc-17, cho-1, ace-2, acr-2, acr-5, acr-14, acr-15, trp-1, nca-1, unc-8, del-1, inx-12, dbl-1, tig-2, nlp-21,F39B2.8, F55C12.4, ceh-12	Kratsios et al 2017, Kratsios et al 2011 , Prasad et al 1998.	Coordinated Regulator	1275	413	259.327	1.59258	1.89e-24	2.96e-25
ceh-32	RIA	M00483_2.00	eat-4	Reilly et al. 2020 (in review Science)	Coordinated Regulator	440	98	70.2458	1.3951	0.000402589	0.000845819
vab-3	URY	M00342_2.00	eat-4, pdfr-1, tol-1	Serrano-Saiz et al 2013	Other	79	49	29.8442	1.64186	1.75e-05	0.761774
unc-30	VD_DD	M01241_2.00		McIntire et al. (1993)	Other	170	102	43.2487	2.35845	1.55e-20	0.0568655
ceh-9	PVN	M03847_2.00	unc-17	Reilly et al. 2020 (in review Science)	Other	122	65	46.2099	1.40662	0.000517238	0.102612
vab-3	OLL	M00342_2.00	eat-4, ser-2, ace-1, grd-8	Serrano-Saiz et al 2013	Other	104	53	39.2885	1.34899	0.00510697	0.476412
unc-42	RMH	M03874_2.00	unc-17, glr-5, rig-5	?	Other	127	55	38.3895	1.43268	0.00156751	0.152212
unc-3	ASI	OH2011_UNC-3	daf-7, sra-6, str-3, unc-3	kim et al 2005. Prasad et al 1998.	Other	372	103	75.6626	1.36131	0.000516953	0.185653
ceh-14	PHA	M00435_2.00	eat-4	Serrano-Saiz et al 2013	Piecemeal Regulator	261	162	149.931	1.08049	0.0789347	0.00336029
unc-42	SIB	M03874_2.00	unc-17,cha-1, cho-1, fax-1	Periera et al 2015, Wightman et al 2005	Piecemeal Regulator	336	111	101.566	1.09289	0.152888	0.00914392
ceh-14	PHB	M00435_2.00	ida-1, dop-1, sra-12, eat-4	Serrano-Saiz et al 2013	Other	393	235	225.759	1.04093	0.195795	0.068587

## Sheet: Supp.Table.2B_bonefide_TSs
Motif signature	TF	motif_ID	neuron_class	differentially expressed gene count	observed genes with a motif match	expected genes with a motif match	fold change enrichrichment	hypergeometric test p value (corrected)	Wilcoxon rank sums test p value (corrected)
Coordinated Regulator	che-1	OH2004_CHE-1	ASE	336	220	134.273	1.63845	1.99e-20	1.07e-26
Coordinated Regulator	hlh-4	OH2018_HLH-4	ADL	595	405	243.105	1.66595	4.49e-40	2.18e-21
Coordinated Regulator	ttx-3	M02085_2.00	AIY	177	86	43.9813	1.95537	2.5e-11	0.00775015
Coordinated Regulator	unc-3	OH2011_UNC-3	DA	901	437	183.258	2.38462	1.74e-80	2.54e-48
Coordinated Regulator	unc-3	OH2011_UNC-3	DB	1280	523	260.344	2.00888	5.08e-65	6.4e-48
Coordinated Regulator	unc-3	OH2011_UNC-3	VA	366	231	74.4422	3.10308	2.3e-69	2.05e-35
Coordinated Regulator	unc-3	OH2011_UNC-3	VB	1275	413	259.327	1.59258	1.89e-24	2.96e-25

## Sheet: Supp.Table.2C.NervousSystem
Motif signature	TF	motif_ID	neuron_class	differentially expressed gene count	observed genes with a motif match	expected genes with a motif match	fold change enrichrichment	hypergeometric test p value (corrected)	Wilcoxon rank sums test p value (corrected)
Piecemeal Regulator	unc-86	M03312_2.00	ADA	273	197	188.209	1.04671	0.147432	3.65e-13
Piecemeal Regulator	ztf-11	M00650_2.00	ADA	273	170	175.384	0.969304	0.791829	3.74e-10
Coordinated Regulator	ceh-18	M00681_2.00	ADA	273	168	126.107	1.33221	4.38e-07	1.96e-08
Coordinated Regulator	unc-86	M02244_2.00	ADA	273	112	78.6638	1.42378	1.56e-05	3.49e-08
Coordinated Regulator	ceh-14	M00435_2.00	ADA	273	180	156.825	1.14778	0.00305012	3.88e-07
Coordinated Regulator	vab-7	M02186_2.00	ADA	273	152	129.53	1.17347	0.00461275	5.24e-06
Coordinated Regulator	unc-62	M02185_2.00	ADA	273	121	87.3589	1.38509	1.99e-05	1.23e-05
Coordinated Regulator	lin-31	M00665_2.00	ADA	273	178	162.001	1.09876	0.0305627	8.16e-05
Coordinated Regulator	2020-06-01	M00599_2.00	ADA	273	117	83.8944	1.39461	2.28e-05	0.000110139
Coordinated Regulator	ztf-9	M00636_2.00	ADA	273	109	72.5228	1.50297	1.75e-06	0.000121957
Coordinated Regulator	ceh-74	M01248_2.00	ADA	273	94	62.0615	1.51463	1.07e-05	0.000516905
Coordinated Regulator	ceh-58	M00676_2.00	ADA	273	115	89.7229	1.28172	0.00106024	0.00582515
Coordinated Regulator	ceh-38	M03716_2.00	ADA	273	153	133.484	1.14621	0.012233	0.0109277
Coordinated Regulator	vab-3	M00342_2.00	ADA	273	142	103.132	1.37687	1.96e-06	0.0136168
Coordinated Regulator	ztf-3	M00640_2.00	ADA	273	135	91.2174	1.47998	6.16e-08	0.0137049
Other	ceh-48	M01905_2.00	ADA	273	155	132.546	1.1694	0.00463224	0.121596
Other	mbr-1	M00707_2.00	ADA	273	70	46.3016	1.51183	0.000247737	0.272867
Piecemeal Regulator	die-1	M00610_2.00	ADE	260	217	223.356	0.971542	0.904472	2.47e-11
Piecemeal Regulator	ztf-11	M00650_2.00	ADE	260	165	167.032	0.987835	0.650416	1.56e-07
Coordinated Regulator	tbx-2	M00830_2.00	ADE	260	105	86.4855	1.21408	0.0111123	8.08e-05
Coordinated Regulator	ceh-43	M00423_2.00	ADE	260	128	94.4819	1.35476	2.1e-05	0.000186916
Coordinated Regulator	ztf-9	M00636_2.00	ADE	260	95	69.0694	1.37543	0.000344522	0.000189133
Coordinated Regulator	ztf-3	M00640_2.00	ADE	260	122	86.8737	1.40434	6.75e-06	0.000427456
Piecemeal Regulator	syd-9	M00646_2.00	ADE	260	115	104.303	1.10256	0.105986	0.000988575
Coordinated Regulator	daf-19	M00709_2.00	ADE	260	66	52.4037	1.25945	0.0266468	0.00130248
Coordinated Regulator	unc-62	M02185_2.00	ADE	260	108	83.199	1.29809	0.000956504	0.00286215
Coordinated Regulator	cey-1	M01903_2.00	ADE	260	74	55.4962	1.33343	0.0048238	0.00339553
Coordinated Regulator	ceh-48	M01905_2.00	ADE	260	145	126.235	1.14865	0.013428	0.00380711
Coordinated Regulator	ceh-38	M03716_2.00	ADE	260	143	127.128	1.12485	0.0314641	0.0268285
Coordinated Regulator	egl-43	M00611_2.00	ADE	260	91	59.6755	1.52491	1.06e-05	0.0351182
Coordinated Regulator	ceh-74	M01248_2.00	ADE	260	84	59.1062	1.42117	0.000330061	0.036217
Other	ceh-58	M00676_2.00	ADE	260	111	85.4504	1.299	0.000734353	0.805327
Coordinated Regulator	ztf-11	M00650_2.00	ADF	525	406	337.276	1.20376	1.26e-10	3.56e-15
Piecemeal Regulator	die-1	M00610_2.00	ADF	525	457	451.008	1.01329	0.258364	1.4e-14
Coordinated Regulator	dmd-6	M00655_2.00	ADF	525	420	375.579	1.11827	7.68e-06	7.73e-11
Coordinated Regulator	nhr-67	M02408_2.00	ADF	525	218	158.409	1.37618	3.62e-08	1.8e-08
Coordinated Regulator	fos-1	M01144_2.00	ADF	525	217	136.044	1.59507	2.65e-14	3.84e-07
Coordinated Regulator	ztf-3	M00640_2.00	ADF	525	265	175.418	1.51068	1.59e-15	1.19e-06
Coordinated Regulator	fkh-8	M03026_2.00	ADF	525	251	173.067	1.45031	2.87e-12	4.2e-06
Coordinated Regulator	nhr-36	M02418_2.00	ADF	525	244	171.368	1.42383	6.17e-11	8.44e-05
Coordinated Regulator	2020-06-01	M00599_2.00	ADF	525	254	161.335	1.57436	6.58e-17	9.21e-05
Coordinated Regulator	ceh-19	M02180_2.00	ADF	525	273	205.334	1.32954	2.66e-09	0.000108593
Coordinated Regulator	mxl-3	M00935_2.00	ADF	525	174	124.392	1.39881	8.38e-07	0.000279164
Coordinated Regulator	ceh-58	M00676_2.00	ADF	525	237	172.544	1.37356	5.58e-09	0.000294372
Coordinated Regulator	ztf-9	M00636_2.00	ADF	525	200	139.467	1.43403	8.71e-09	0.000474784
Coordinated Regulator	ceh-9	M03847_2.00	ADF	525	255	198.854	1.28235	5.65e-07	0.00162647
Coordinated Regulator	egl-43	M00611_2.00	ADF	525	192	120.499	1.59338	2.91e-12	0.00261569
Coordinated Regulator	ceh-23	M00671_2.00	ADF	525	281	221.297	1.26978	1.55e-07	0.00438885
Coordinated Regulator	ztf-14	M00628_2.00	ADF	525	162	120.995	1.3389	3.04e-05	0.0101055
Piecemeal Regulator	ceh-38	M03716_2.00	ADF	525	274	256.7	1.06739	0.0754556	0.0106717
Coordinated Regulator	hlh-30	M00937_2.00	ADF	525	200	121.596	1.64479	3.03e-14	0.015577
Coordinated Regulator	ceh-74	M01248_2.00	ADF	525	177	119.349	1.48304	1.03e-08	0.0179185
Coordinated Regulator	atf-5	M00593_2.00	ADF	525	242	159.977	1.51272	9.74e-14	0.0411699
Coordinated Regulator	ceh-57	M00675_2.00	ADF	525	177	128.18	1.38087	1.46e-06	0.0427943
Other	nsy-7	M00966_2.00	ADF	525	211	140.904	1.49747	4.46e-11	0.102889
Other	mdl-1	M08183_2.00	ADF	525	217	142.393	1.52395	3.12e-12	0.232603
Other	ceh-48	M01905_2.00	ADF	525	283	254.897	1.11025	0.00888535	0.349808
Other	lin-15B	M09654_2.0	ADF	525	208	176.097	1.18116	0.00233971	0.666461
Other	crh-1	M03659_2.00	ADF	525	213	133.824	1.59165	7.01e-14	0.994711
Coordinated Regulator	hlh-4	OH2018_HLH-4	ADL	595	405	243.105	1.66595	4.49e-40	2.18e-21
Coordinated Regulator	ztf-11	M00650_2.00	ADL	595	407	382.246	1.06476	0.0199167	9.95e-05
Coordinated Regulator	fkh-8	M03026_2.00	ADL	595	219	196.142	1.11654	0.0284464	0.00219125
Piecemeal Regulator	unc-86	M03312_2.00	ADL	595	407	410.199	0.992202	0.650959	0.00387392
Piecemeal Regulator	dmd-6	M00655_2.00	ADL	595	432	425.656	1.0149	0.310318	0.0040069
Coordinated Regulator	nhr-6	M01298_2.00	ADL	595	280	255.66	1.09521	0.0264429	0.00680495
Coordinated Regulator	unc-86	M02244_2.00	ADL	595	203	171.447	1.18404	0.00311077	0.01305
Coordinated Regulator	ztf-3	M00640_2.00	ADL	595	220	198.807	1.1066	0.0393224	0.0345978
Other	mxl-3	M00935_2.00	ADL	595	142	140.977	1.00726	0.493344	0.0582413
Other	egl-44	M09438_2.00	ADL	595	254	216.899	1.17105	0.00113986	0.108211
Other	egl-43	M00611_2.00	ADL	595	160	136.565	1.1716	0.0150108	0.110918
Other	ceh-48	M01905_2.00	ADL	595	269	288.883	0.931172	0.966708	0.193389
Other	ztf-9	M00636_2.00	ADL	595	198	158.063	1.25267	0.000201317	0.246692
Other	ceh-23	M00671_2.00	ADL	595	265	250.804	1.0566	0.134059	0.300455
Other	ceh-57	M00675_2.00	ADL	595	176	145.271	1.21153	0.00258698	0.346357
Other	nhr-36	M02418_2.00	ADL	595	221	194.217	1.1379	0.0124171	0.472951
Other	ceh-38	M03716_2.00	ADL	595	273	290.926	0.938382	0.949302	0.504833
Other	ceh-32	M00483_2.00	ADL	595	109	94.9915	1.14747	0.0709623	0.716065
Other	ceh-74	M01248_2.00	ADL	595	164	135.262	1.21246	0.00374442	0.740913
Other	ceh-58	M00676_2.00	ADL	595	230	195.55	1.17617	0.0019098	0.774025
Other	atf-5	M00593_2.00	ADL	595	221	181.307	1.21893	0.000345275	0.960547
Coordinated Regulator	dmd-8	M00660_2.00	AFD	370	299	267.584	1.1174	0.000132854	4.93e-20
Coordinated Regulator	ztf-11	M00650_2.00	AFD	370	270	237.699	1.13589	0.000276895	3.72e-17
Coordinated Regulator	ceh-14	M00435_2.00	AFD	370	251	212.547	1.18092	3.58e-05	1.48e-13
Coordinated Regulator	nhr-6	M01298_2.00	AFD	370	228	158.982	1.43413	1.15e-12	2.39e-12
Coordinated Regulator	gei-3	M00711_2.00	AFD	370	198	125.745	1.57461	3.24e-14	2.88e-11
Coordinated Regulator	egl-13	M00710_2.00	AFD	370	267	215.806	1.23722	4.15e-08	3.59e-11
Coordinated Regulator	atf-7	M00595_2.00	AFD	370	206	125.267	1.64449	2.89e-17	5.36e-10
Coordinated Regulator	ztf-3	M00640_2.00	AFD	370	206	123.628	1.66629	5.78e-18	7e-09
Coordinated Regulator	ceh-58	M00676_2.00	AFD	370	169	121.602	1.38977	3.33e-07	3.89e-07
Coordinated Regulator	ceh-54	M02188_2.00	AFD	370	195	142.76	1.36593	4.61e-08	1.95e-06
Coordinated Regulator	ttx-1	M00396_2.00	AFD	370	180	76.9682	2.33863	1.02e-31	2.02e-06
Coordinated Regulator	ceh-23	M00671_2.00	AFD	370	195	155.962	1.2503	3.8e-05	2.92e-06
Coordinated Regulator	ztf-9	M00636_2.00	AFD	370	163	98.291	1.65834	8.94e-13	6.47e-06
Coordinated Regulator	ceh-74	M01248_2.00	AFD	370	150	84.1127	1.78332	4.62e-14	3.22e-05
Coordinated Regulator	lim-7	M01242_2.00	AFD	370	183	137.291	1.33294	1.31e-06	3.87e-05
Coordinated Regulator	fos-1	M01144_2.00	AFD	370	165	95.8789	1.72092	2.06e-14	4.72e-05
Coordinated Regulator	dmd-9	M00661_2.00	AFD	370	121	71.6099	1.68971	1.7e-09	7.01e-05
Coordinated Regulator	ceh-38	M03716_2.00	AFD	370	211	180.912	1.16631	0.0012478	0.000180088
Coordinated Regulator	atf-5	M00593_2.00	AFD	370	179	112.746	1.58765	1.19e-12	0.000687068
Coordinated Regulator	nhr-36	M02418_2.00	AFD	370	194	120.774	1.60631	1.06e-14	0.000814374
Coordinated Regulator	dsc-1	M02063_2.00	AFD	370	133	91.386	1.45537	1.45e-06	0.00640967
Other	ceh-48	M01905_2.00	AFD	370	214	179.642	1.19126	0.000268543	0.0810848
Other	daf-19	M00709_2.00	AFD	370	105	74.5745	1.40799	0.000125552	0.137779
Other	nsy-7	M00966_2.00	AFD	370	157	99.3038	1.58101	1.57e-10	0.554977
Other	dpl-1	M09525_2.00	AFD	370	107	80.6509	1.3267	0.000961003	0.752285
Coordinated Regulator	ttx-3	M02085_2.00	AIA	89	49	22.1149	2.2157	2.96e-09	5.24e-05
Coordinated Regulator	ztf-11	M00650_2.00	AIA	89	71	57.1763	1.24177	0.00141723	0.000416989
Coordinated Regulator	ceh-58	M00676_2.00	AIA	89	53	29.2503	1.81195	4.3e-07	0.00220764
Coordinated Regulator	ztf-9	M00636_2.00	AIA	89	41	23.643	1.73413	8.95e-05	0.00715469
Coordinated Regulator	ztf-3	M00640_2.00	AIA	89	61	29.7375	2.05128	4.65e-11	0.00915626
Coordinated Regulator	ceh-74	M01248_2.00	AIA	89	45	20.2325	2.22414	2.16e-08	0.0231989
Other	ceh-38	M03716_2.00	AIA	89	55	43.5167	1.26388	0.0115829	0.232869
Other	ceh-48	M01905_2.00	AIA	89	54	43.2111	1.24968	0.0168235	0.304075
Piecemeal Regulator	die-1	M00610_2.00	AIB	242	216	207.893	1.039	0.0822641	2.21e-23
Coordinated Regulator	ztf-11	M00650_2.00	AIB	242	189	155.468	1.21568	3.52e-06	1.78e-16
Coordinated Regulator	nhr-6	M01298_2.00	AIB	242	157	103.983	1.50987	1.66e-11	6.05e-14
Coordinated Regulator	ceh-18	M00681_2.00	AIB	242	154	111.787	1.37762	6.98e-08	7.01e-13
Coordinated Regulator	ztf-9	M00636_2.00	AIB	242	117	64.2876	1.81995	1.21e-12	3.37e-12
Coordinated Regulator	ztf-3	M00640_2.00	AIB	242	147	80.8594	1.81797	1.78e-17	1.19e-08
Coordinated Regulator	ceh-74	M01248_2.00	AIB	242	104	55.0142	1.89042	6.78e-12	5.42e-07
Coordinated Regulator	maf-1	M01814_2.00	AIB	242	120	80.7148	1.48672	2.44e-07	9.66e-07
Coordinated Regulator	unc-62	M02185_2.00	AIB	242	130	77.439	1.67874	7.42e-12	3.46e-06
Coordinated Regulator	lim-7	M01242_2.00	AIB	242	138	89.7956	1.53682	6.2e-10	1.22e-05
Coordinated Regulator	ceh-48	M01905_2.00	AIB	242	151	117.495	1.28516	1.54e-05	1.33e-05
Coordinated Regulator	tab-1	M00516_2.00	AIB	242	115	67.2142	1.71095	1.38e-10	2.11e-05
Coordinated Regulator	ceh-58	M00676_2.00	AIB	242	130	79.5346	1.63451	5.34e-11	2.35e-05
Coordinated Regulator	crh-2	M00603_2.00	AIB	242	115	72.9107	1.57727	2.06e-08	0.000140291
Coordinated Regulator	unc-42	M03874_2.00	AIB	242	122	73.1516	1.66777	1.13e-10	0.000179665
Coordinated Regulator	ceh-38	M03716_2.00	AIB	242	150	118.326	1.26768	4.11e-05	0.00114771
Coordinated Regulator	ceh-62	M02187_2.00	AIB	242	91	49.7151	1.83043	1.86e-09	0.0346846
Coordinated Regulator	ztf-11	M00650_2.00	AIM	240	209	154.183	1.35553	5.76e-15	5.53e-23
Coordinated Regulator	unc-86	M03312_2.00	AIM	240	214	165.458	1.29338	3.94e-13	6.55e-22
Coordinated Regulator	ceh-14	M00435_2.00	AIM	240	199	137.868	1.44341	1.69e-16	1.89e-20
Coordinated Regulator	atf-7	M00595_2.00	AIM	240	170	81.2541	2.0922	2.81e-30	2.48e-15
Coordinated Regulator	unc-86	M02244_2.00	AIM	240	133	69.155	1.92322	3.58e-17	2.6e-13
Coordinated Regulator	daf-16	M01989_2.00	AIM	240	166	91.5019	1.81417	1.63e-21	3.21e-11
Coordinated Regulator	ztf-3	M00640_2.00	AIM	240	161	80.1911	2.0077	2.18e-25	1.38e-09
Coordinated Regulator	ztf-9	M00636_2.00	AIM	240	130	63.7563	2.03901	8.33e-19	2.29e-08
Coordinated Regulator	2020-06-01	M00599_2.00	AIM	240	151	73.7534	2.04736	9.67e-24	3.96e-07
Coordinated Regulator	ceh-58	M00676_2.00	AIM	240	150	78.8773	1.90169	3.96e-20	6.95e-07
Coordinated Regulator	ceh-74	M01248_2.00	AIM	240	124	54.5596	2.27275	1.33e-21	7.15e-07
Coordinated Regulator	mls-2	M03233_2.00	AIM	240	170	101.774	1.67037	2.93e-18	9.26e-07
Coordinated Regulator	cey-1	M01903_2.00	AIM	240	121	51.2272	2.36202	2.5e-22	6.45e-06
Coordinated Regulator	lim-7	M01242_2.00	AIM	240	158	89.0534	1.77422	1.13e-18	0.000342553
Coordinated Regulator	ceh-38	M03716_2.00	AIM	240	159	117.348	1.35494	8.27e-08	0.00378169
Coordinated Regulator	ceh-48	M01905_2.00	AIM	240	158	116.524	1.35594	9.49e-08	0.0132527
Other	mbr-1	M00707_2.00	AIM	240	78	40.7047	1.91624	6.97e-09	0.074224
Other	crh-1	M03659_2.00	AIM	240	129	61.1765	2.10865	7.2e-20	0.283456
Other	nsy-7	M00966_2.00	AIM	240	110	64.4133	1.70772	5.49e-10	0.552933
Coordinated Regulator	ztf-11	M00650_2.00	AIN	157	127	100.862	1.25915	6.4e-06	6.64e-12
Coordinated Regulator	nhr-67	M02408_2.00	AIN	157	73	47.3719	1.541	1.91e-05	3.44e-07
Coordinated Regulator	ztf-3	M00640_2.00	AIN	157	101	52.4583	1.92534	1.15e-14	1.92e-06
Coordinated Regulator	ztf-9	M00636_2.00	AIN	157	80	41.7073	1.91813	1.97e-10	5.86e-06
Coordinated Regulator	ceh-18	M00681_2.00	AIN	157	112	72.5228	1.54434	4.25e-10	1.06e-05
Coordinated Regulator	ceh-58	M00676_2.00	AIN	157	95	51.5989	1.84113	4.09e-12	0.000431126
Coordinated Regulator	ceh-74	M01248_2.00	AIN	157	76	35.6911	2.12939	5.52e-12	0.00113328
Coordinated Regulator	ttx-3	M02085_2.00	AIN	157	90	39.0117	2.307	3.13e-17	0.00367052
Coordinated Regulator	2020-06-01	M00599_2.00	AIN	157	97	48.247	2.01049	5.04e-15	0.00467852
Coordinated Regulator	ceh-5	M02179_2.00	AIN	157	81	40.8791	1.98145	2.52e-11	0.00552884
Coordinated Regulator	fos-1	M01144_2.00	AIN	157	92	40.6837	2.26135	3.4e-17	0.0165238
Other	tab-1	M00516_2.00	AIN	157	78	43.6059	1.78875	1.15e-08	0.0881295
Other	ceh-48	M01905_2.00	AIN	157	96	76.2263	1.25941	0.00129261	0.197054
Other	mbr-1	M00707_2.00	AIN	157	58	26.6277	2.17819	3.96e-09	0.35808
Other	ceh-38	M03716_2.00	AIN	157	89	76.7655	1.15938	0.0341546	0.736097
Other	lin-15B	M09654_2.0	AIN	157	73	52.6615	1.38621	0.000671735	0.943696
Coordinated Regulator	ceh-10--ttx-3	OH2007_CEH-10_TTX-3	AIY	177	131	91.583	1.4304	2.65e-09	1.49e-21
Coordinated Regulator	fax-1	M06432_2.00	AIY	177	136	110.61	1.22955	4.8e-05	7.59e-10
Coordinated Regulator	ztf-11	M00650_2.00	AIY	177	143	113.71	1.25758	1.95e-06	9.78e-07
Coordinated Regulator	ztf-3	M00640_2.00	AIY	177	103	59.1409	1.7416	3.9e-11	4.88e-06
Coordinated Regulator	ceh-10	M00287_2.00	AIY	177	104	67.7557	1.53493	5.77e-08	2.98e-05
Coordinated Regulator	ztf-9	M00636_2.00	AIY	177	77	47.0203	1.63759	1.49e-06	3.47e-05
Coordinated Regulator	lin-39	M08211_2.00	AIY	177	111	73.6663	1.50679	2.72e-08	7.35e-05
Coordinated Regulator	hlh-16	M00589_2.00	AIY	177	107	69.3941	1.54192	1.99e-08	0.000189685
Coordinated Regulator	ceh-23	M00671_2.00	AIY	177	110	74.6088	1.47436	1.32e-07	0.00548636
Coordinated Regulator	ttx-3	M02085_2.00	AIY	177	86	43.9813	1.95537	2.5e-11	0.00775015
Coordinated Regulator	ceh-74	M01248_2.00	AIY	177	76	40.2377	1.88878	4.59e-09	0.00940978
Coordinated Regulator	ceh-48	M01905_2.00	AIY	177	109	85.9367	1.26838	0.00043942	0.0116896
Coordinated Regulator	ceh-58	M00676_2.00	AIY	177	91	58.172	1.56433	4.94e-07	0.0124972
Other	ceh-38	M03716_2.00	AIY	177	98	86.5445	1.13237	0.0545896	0.305601
Other	lin-15B	M09654_2.0	AIY	177	77	59.37	1.29695	0.00442668	0.560005
Piecemeal Regulator	die-1	M00610_2.00	AIZ	1144	987	982.767	1.00431	0.390457	1.09e-46
Coordinated Regulator	ceh-48	M01905_2.00	AIZ	1144	725	555.433	1.30529	4.62e-24	8.76e-39
Coordinated Regulator	cebp-1	M00604_2.00	AIZ	1144	840	751.906	1.11716	1.31e-08	2.88e-35
Piecemeal Regulator	ztf-11	M00650_2.00	AIZ	1144	705	734.941	0.959261	0.982494	4.87e-34
Coordinated Regulator	unc-86	M03312_2.00	AIZ	1144	849	788.685	1.07648	5.07e-05	2.71e-29
Coordinated Regulator	ztf-3	M00640_2.00	AIZ	1144	531	382.244	1.38916	5.15e-20	7.19e-29
Coordinated Regulator	ceh-38	M03716_2.00	AIZ	1144	740	559.361	1.32294	3.73e-27	1.3e-28
Coordinated Regulator	atf-7	M00595_2.00	AIZ	1144	516	387.311	1.33226	2.03e-15	1.98e-27
Piecemeal Regulator	dmd-6	M00655_2.00	AIZ	1144	802	818.404	0.979957	0.889425	1.1e-25
Coordinated Regulator	unc-86	M02244_2.00	AIZ	1144	401	329.639	1.21648	2.62e-06	4.64e-24
Coordinated Regulator	ceh-16	M06491_2.00	AIZ	1144	702	604.338	1.1616	3.64e-09	2.45e-20
Coordinated Regulator	2020-06-01	M00599_2.00	AIZ	1144	443	351.558	1.26011	5.37e-09	8.81e-19
Coordinated Regulator	ceh-43	M00423_2.00	AIZ	1144	504	415.721	1.21235	4.72e-08	7.24e-17
Coordinated Regulator	cey-1	M01903_2.00	AIZ	1144	359	244.183	1.47021	1.43e-15	3.21e-15
Coordinated Regulator	fos-1	M01144_2.00	AIZ	1144	388	296.447	1.30883	1.08e-09	5.93e-15
Coordinated Regulator	ceh-74	M01248_2.00	AIZ	1144	371	260.067	1.42655	3.24e-14	2.15e-13
Coordinated Regulator	ztf-9	M00636_2.00	AIZ	1144	374	303.905	1.23065	2.37e-06	1.66e-12
Coordinated Regulator	crh-2	M00603_2.00	AIZ	1144	448	344.669	1.2998	4.54e-11	9.68e-09
Coordinated Regulator	ceh-58	M00676_2.00	AIZ	1144	465	375.982	1.23676	2.02e-08	2.23e-08
Coordinated Regulator	unc-62	M02185_2.00	AIZ	1144	433	366.075	1.18282	1.57e-05	1.04e-07
Coordinated Regulator	crh-1	M03659_2.00	AIZ	1144	405	291.608	1.38885	6.12e-14	3.77e-06
Coordinated Regulator	xbp-1	M00597_2.00	AIZ	1144	435	293.942	1.47988	2.79e-20	0.000270609
Coordinated Regulator	ztf-11	M00650_2.00	ALA	163	128	104.716	1.22235	8.14e-05	3.21e-11
Coordinated Regulator	ceh-14	M00435_2.00	ALA	163	133	93.6354	1.4204	1.47e-10	3.98e-11
Coordinated Regulator	ceh-18	M00681_2.00	ALA	163	110	75.2944	1.46093	6.96e-08	8.04e-10
Coordinated Regulator	nhr-6	M01298_2.00	ALA	163	123	70.0379	1.75619	2.03e-16	2.34e-09
Coordinated Regulator	ztf-3	M00640_2.00	ALA	163	100	54.4631	1.8361	1.03e-12	1.61e-05
Coordinated Regulator	ceh-58	M00676_2.00	ALA	163	84	53.5708	1.56802	1.18e-06	3.17e-05
Coordinated Regulator	ztf-9	M00636_2.00	ALA	163	85	43.3012	1.96299	1.2e-11	8.83e-05
Coordinated Regulator	unc-62	M02185_2.00	ALA	163	104	52.1594	1.99389	4.63e-16	0.000109177
Coordinated Regulator	lim-7	M01242_2.00	ALA	163	107	60.4821	1.76912	5.53e-13	0.000894547
Coordinated Regulator	atf-5	M00593_2.00	ALA	163	92	49.669	1.85226	1.83e-11	0.000930806
Coordinated Regulator	ceh-74	M01248_2.00	ALA	163	71	37.055	1.91607	7.21e-09	0.0276906
Other	ceh-38	M03716_2.00	ALA	163	104	79.6992	1.30491	0.000126476	0.0582413
Other	ceh-48	M01905_2.00	ALA	163	113	79.1394	1.42786	1.27e-07	0.0766998
Coordinated Regulator	hsf-1	M00682_2.00	ALM	295	219	173.955	1.25895	5.7e-08	2.24e-20
Coordinated Regulator	unc-86	M03312_2.00	ALM	295	247	203.376	1.2145	9.77e-09	1.34e-18
Coordinated Regulator	ztf-11	M00650_2.00	ALM	295	221	189.517	1.16612	7.8e-05	3.74e-17
Coordinated Regulator	unc-86	M02244_2.00	ALM	295	142	85.003	1.67053	5.62e-12	5.85e-16
Coordinated Regulator	ceh-18	M00681_2.00	ALM	295	195	136.269	1.43099	1.26e-11	5.93e-14
Coordinated Regulator	pag-3	M00619_2.00	ALM	295	187	145.489	1.28532	1.3e-06	7.31e-14
Coordinated Regulator	atf-7	M00595_2.00	ALM	295	169	99.8748	1.69212	6.61e-16	7.71e-11
Coordinated Regulator	ceh-58	M00676_2.00	ALM	295	164	96.9533	1.69154	3.45e-15	7.96e-11
Coordinated Regulator	ztf-3	M00640_2.00	ALM	295	176	98.5682	1.78557	1.57e-19	8.56e-11
Coordinated Regulator	ztf-9	M00636_2.00	ALM	295	138	78.3672	1.76094	2.65e-13	1.2e-08
Coordinated Regulator	ceh-74	M01248_2.00	ALM	295	137	67.0628	2.04286	1.47e-18	3.57e-08
Coordinated Regulator	ceh-38	M03716_2.00	ALM	295	166	144.241	1.15085	0.00771083	1.75e-07
Coordinated Regulator	unc-62	M02185_2.00	ALM	295	162	94.3988	1.71612	1.62e-15	4.79e-07
Coordinated Regulator	vab-3	M00342_2.00	ALM	295	161	111.443	1.44468	7.44e-09	9.24e-05
Coordinated Regulator	ceh-48	M01905_2.00	ALM	295	175	143.228	1.22183	0.000174495	0.00214695
Coordinated Regulator	ztf-11	M00650_2.00	ALN	66	53	42.4004	1.24999	0.00436056	0.000160025
Coordinated Regulator	unc-86	M03312_2.00	ALN	66	56	45.501	1.23074	0.00313965	0.00863384
Coordinated Regulator	ztf-9	M00636_2.00	ALN	66	32	17.533	1.82513	0.000164715	0.00904836
Coordinated Regulator	ceh-58	M00676_2.00	ALN	66	32	21.6913	1.47525	0.00735035	0.0184818
Coordinated Regulator	ceh-18	M00681_2.00	ALN	66	43	30.4873	1.41042	0.00190117	0.0393647
Other	unc-86	M02244_2.00	ALN	66	37	19.0176	1.94556	5.85e-06	0.0537911
Other	ztf-3	M00640_2.00	ALN	66	38	22.0526	1.72316	7.26e-05	0.41161
Other	ceh-74	M01248_2.00	ALN	66	29	15.0039	1.93283	0.000157319	0.500732
Other	ceh-38	M03716_2.00	ALN	66	34	32.2708	1.05358	0.396012	0.611835
Other	ceh-48	M01905_2.00	ALN	66	35	32.0442	1.09224	0.285894	0.781858
Coordinated Regulator	unc-86	M03312_2.00	AQR	234	190	161.322	1.17777	2.42e-05	4.25e-13
Coordinated Regulator	ztf-11	M00650_2.00	AQR	234	185	150.329	1.23064	1.07e-06	3.49e-08
Coordinated Regulator	daf-19	M00709_2.00	AQR	234	81	47.1633	1.71744	3.23e-07	6.17e-07
Coordinated Regulator	unc-86	M02244_2.00	AQR	234	100	67.4261	1.48311	6.11e-06	9.1e-07
Coordinated Regulator	egl-13	M00710_2.00	AQR	234	167	136.483	1.2236	3.56e-05	1.02e-06
Coordinated Regulator	ztf-3	M00640_2.00	AQR	234	126	78.1863	1.61154	2.74e-10	0.00010539
Coordinated Regulator	unc-62	M02185_2.00	AQR	234	111	74.8791	1.48239	1.09e-06	0.000105835
Coordinated Regulator	lin-39	M08211_2.00	AQR	234	131	97.3894	1.34512	1.03e-05	0.00068139
Coordinated Regulator	ceh-58	M00676_2.00	AQR	234	101	76.9053	1.3133	0.000807634	0.00272296
Coordinated Regulator	ztf-9	M00636_2.00	AQR	234	94	62.1624	1.51217	6.51e-06	0.00463426
Coordinated Regulator	ceh-74	M01248_2.00	AQR	234	97	53.1956	1.82346	3.46e-10	0.0225144
Other	atf-5	M00593_2.00	AQR	234	105	71.304	1.47257	3.96e-06	0.0646279
Other	ceh-38	M03716_2.00	AQR	234	120	114.415	1.04882	0.26496	0.358981
Other	ceh-48	M01905_2.00	AQR	234	130	113.611	1.14425	0.0213585	0.547495
Coordinated Regulator	unc-3	OH2011_UNC-3	AS	230	153	46.7806	3.27058	4.59e-50	2.01e-31
Coordinated Regulator	ztf-11	M00650_2.00	AS	230	187	147.759	1.26557	2.26e-08	3.51e-26
Coordinated Regulator	gei-3	M00711_2.00	AS	230	146	78.1661	1.86782	4.63e-19	4.12e-21
Coordinated Regulator	ztf-3	M00640_2.00	AS	230	164	76.8498	2.13403	1.72e-30	2.16e-20
Coordinated Regulator	lin-39	M08211_2.00	AS	230	171	95.7246	1.78637	7.03e-23	6.03e-18
Coordinated Regulator	syd-9	M00646_2.00	AS	230	150	92.2678	1.6257	5.26e-14	7.94e-18
Coordinated Regulator	mab-5	M01240_2.00	AS	230	159	111.841	1.42166	6.2e-10	3.53e-17
Coordinated Regulator	ceh-18	M00681_2.00	AS	230	168	106.244	1.58127	6.26e-16	3.83e-15
Coordinated Regulator	ceh-38	M03716_2.00	AS	230	151	112.459	1.34271	3.95e-07	6.28e-14
Coordinated Regulator	elt-1	M08206_2.00	AS	230	135	74.6292	1.80894	1.25e-15	2.04e-12
Coordinated Regulator	ceh-58	M00676_2.00	AS	230	136	75.5907	1.79916	1.33e-15	4.04e-11
Coordinated Regulator	unc-62	M02185_2.00	AS	230	135	73.5991	1.83426	3.83e-16	1.36e-10
Coordinated Regulator	ztf-9	M00636_2.00	AS	230	131	61.0998	2.14403	2e-21	2.21e-09
Coordinated Regulator	ceh-13	M00450_2.00	AS	230	132	75.6708	1.7444	8.08e-14	4.27e-08
Coordinated Regulator	egl-44	M09438_2.00	AS	230	145	83.8434	1.72941	1.2e-15	6.87e-08
Coordinated Regulator	ceh-74	M01248_2.00	AS	230	127	52.2863	2.42894	2.05e-25	3.74e-07
Coordinated Regulator	vab-3	M00342_2.00	AS	230	149	86.8881	1.71485	5.18e-16	7.78e-07
Coordinated Regulator	ceh-48	M01905_2.00	AS	230	153	111.669	1.37012	5.72e-08	1.21e-06
Coordinated Regulator	nsy-7	M00966_2.00	AS	230	119	61.7294	1.92777	4.45e-15	0.0241944
Coordinated Regulator	che-1	OH2004_CHE-1	ASE	336	220	134.273	1.63845	1.99e-20	1.07e-26
Piecemeal Regulator	die-1	M00610_2.00	ASE	336	299	288.645	1.03587	0.0621603	7.14e-13
Coordinated Regulator	ztf-11	M00650_2.00	ASE	336	243	215.857	1.12575	0.00123858	1.98e-10
Coordinated Regulator	ceh-36	M00673_2.00	ASE	336	162	78.1057	2.07411	9.63e-23	8.41e-09
Coordinated Regulator	lsy-2	M00615_2.00	ASE	336	208	165.642	1.25572	3.46e-06	4.87e-08
Coordinated Regulator	lsy-27	M00624_2.00	ASE	336	185	119.357	1.54997	6.54e-13	1.06e-06
Coordinated Regulator	ztf-3	M00640_2.00	ASE	336	179	112.268	1.59441	1.79e-13	1.93e-06
Coordinated Regulator	ceh-54	M02188_2.00	ASE	336	167	129.641	1.28817	3.14e-05	4.68e-06
Coordinated Regulator	daf-16	M01989_2.00	ASE	336	177	128.103	1.3817	7.76e-08	9.83e-06
Coordinated Regulator	syd-9	M00646_2.00	ASE	336	173	134.791	1.28347	2.29e-05	6.17e-05
Coordinated Regulator	nhr-67	M02408_2.00	ASE	336	144	101.382	1.42037	9.55e-07	0.000100414
Coordinated Regulator	ceh-23	M00671_2.00	ASE	336	174	141.63	1.22855	0.00029911	0.000413435
Coordinated Regulator	ceh-58	M00676_2.00	ASE	336	151	110.428	1.3674	4.08e-06	0.00043481
Coordinated Regulator	ztf-9	M00636_2.00	ASE	336	147	89.2589	1.64689	2.17e-11	0.000440762
Coordinated Regulator	hlh-10	M00930_2.00	ASE	336	173	119.023	1.4535	2.6e-09	0.000879306
Coordinated Regulator	fkh-8	M03026_2.00	ASE	336	156	110.763	1.40842	3.44e-07	0.00104268
Coordinated Regulator	lim-6	M00432_2.00	ASE	336	128	88.1218	1.45253	1.95e-06	0.00161926
Coordinated Regulator	nhr-36	M02418_2.00	ASE	336	166	109.676	1.51355	3.37e-10	0.00164855
Coordinated Regulator	dmd-9	M00661_2.00	ASE	336	111	65.0296	1.70692	4.3e-09	0.00305708
Coordinated Regulator	mxl-3	M00935_2.00	ASE	336	113	79.6106	1.41941	3.32e-05	0.00518484
Coordinated Regulator	daf-19	M00709_2.00	ASE	336	118	67.7217	1.74243	2.86e-10	0.0137725
Coordinated Regulator	ceh-74	M01248_2.00	ASE	336	128	76.3834	1.67576	3.89e-10	0.0237827
Other	atf-5	M00593_2.00	ASE	336	163	102.385	1.59203	9.36e-12	0.0838357
Other	dsc-1	M02063_2.00	ASE	336	122	82.9884	1.47009	2.21e-06	0.149215
Other	crh-1	M03659_2.00	ASE	336	136	85.6471	1.58791	2.78e-09	0.73542
Other	ceh-38	M03716_2.00	ASE	336	186	164.288	1.13216	0.0117352	0.748843
Other	ceh-48	M01905_2.00	ASE	336	191	163.134	1.17082	0.00168386	0.752285
Coordinated Regulator	ztf-11	M00650_2.00	ASG	558	378	358.476	1.05446	0.0486907	5.58e-14
Coordinated Regulator	ceh-18	M00681_2.00	ASG	558	320	257.756	1.24148	1.23e-07	8.97e-13
Piecemeal Regulator	dmd-6	M00655_2.00	ASG	558	407	399.186	1.01957	0.257884	2.44e-12
Coordinated Regulator	nhr-84	M02414_2.00	ASG	558	252	207.938	1.2119	9.88e-05	5.71e-12
Coordinated Regulator	atf-7	M00595_2.00	ASG	558	255	188.916	1.34981	7.59e-09	3.45e-11
Coordinated Regulator	fkh-8	M03026_2.00	ASG	558	258	183.945	1.40259	9.8e-11	9.9e-09
Coordinated Regulator	ceh-37	M00674_2.00	ASG	558	228	146.984	1.55119	1.47e-13	1.12e-08
Coordinated Regulator	ceh-54	M02188_2.00	ASG	558	252	215.297	1.17048	0.00102682	6.6e-08
Coordinated Regulator	2020-06-01	M00599_2.00	ASG	558	244	171.477	1.42294	1.28e-10	1.1e-07
Coordinated Regulator	syd-9	M00646_2.00	ASG	558	246	223.85	1.09895	0.0335678	3.05e-07
Coordinated Regulator	ztf-3	M00640_2.00	ASG	558	257	186.444	1.37843	7.11e-10	1.07e-06
Coordinated Regulator	npax-1	M02427_2.00	ASG	558	259	217.574	1.1904	0.000254656	3.97e-06
Coordinated Regulator	dmd-9	M00661_2.00	ASG	558	152	107.996	1.40747	5.08e-06	6.47e-06
Coordinated Regulator	ztf-9	M00636_2.00	ASG	558	195	148.234	1.31549	1.02e-05	2.28e-05
Coordinated Regulator	nhr-67	M02408_2.00	ASG	558	203	168.366	1.2057	0.00110642	2.28e-05
Coordinated Regulator	unc-30	M01241_2.00	ASG	558	225	141.958	1.58498	2.39e-14	5.73e-05
Coordinated Regulator	ceh-38	M03716_2.00	ASG	558	298	272.835	1.09223	0.0200149	0.000369015
Coordinated Regulator	ceh-74	M01248_2.00	ASG	558	174	126.851	1.37169	3.57e-06	0.000441676
Coordinated Regulator	ceh-48	M01905_2.00	ASG	558	316	270.919	1.1664	9.72e-05	0.000808925
Coordinated Regulator	ceh-23	M00671_2.00	ASG	558	283	235.208	1.20319	3.52e-05	0.00156471
Coordinated Regulator	ceh-58	M00676_2.00	ASG	558	232	183.39	1.26507	1.31e-05	0.00645162
Coordinated Regulator	irx-1	M02064_2.00	ASG	558	145	108.301	1.33886	0.000109683	0.0253705
Coordinated Regulator	atf-5	M00593_2.00	ASG	558	223	170.033	1.31151	1.64e-06	0.0410259
Other	mdl-1	M08183_2.00	ASG	558	199	151.344	1.31489	7.96e-06	0.100507
Other	ceh-57	M00675_2.00	ASG	558	179	136.237	1.31389	3.24e-05	0.26873
Coordinated Regulator	ztf-11	M00650_2.00	ASH	451	321	289.736	1.1079	0.00127785	7.14e-11
Piecemeal Regulator	die-1	M00610_2.00	ASH	451	374	387.437	0.965318	0.979291	5.19e-10
Piecemeal Regulator	dmd-6	M00655_2.00	ASH	451	333	322.64	1.03211	0.15937	2.64e-09
Coordinated Regulator	mef-2	M02745_2.00	ASH	451	298	266.461	1.11836	0.00158171	9.91e-09
Coordinated Regulator	unc-42	M03874_2.00	ASH	451	174	136.328	1.27633	0.000118891	4.3e-06
Coordinated Regulator	ceh-54	M02188_2.00	ASH	451	214	174.012	1.2298	9.97e-05	8.95e-06
Coordinated Regulator	fkh-8	M03026_2.00	ASH	451	197	148.672	1.32506	1.96e-06	3.18e-05
Coordinated Regulator	2020-06-01	M00599_2.00	ASH	451	219	138.595	1.58015	5.81e-15	4.09e-05
Coordinated Regulator	ceh-74	M01248_2.00	ASH	451	130	102.527	1.26796	0.00180222	0.000306129
Coordinated Regulator	ztf-3	M00640_2.00	ASH	451	200	150.692	1.32721	1.34e-06	0.00032772
Coordinated Regulator	ceh-23	M00671_2.00	ASH	451	225	190.105	1.18356	0.000661573	0.00163239
Coordinated Regulator	ceh-58	M00676_2.00	ASH	451	193	148.224	1.30209	9.28e-06	0.00311221
Piecemeal Regulator	ceh-38	M03716_2.00	ASH	451	217	220.517	0.98405	0.667562	0.00388287
Coordinated Regulator	egl-43	M00611_2.00	ASH	451	147	103.514	1.4201	2.59e-06	0.0144292
Coordinated Regulator	ztf-9	M00636_2.00	ASH	451	171	119.809	1.42727	1.44e-07	0.0365008
Coordinated Regulator	mdl-1	M08183_2.00	ASH	451	159	122.323	1.29984	0.000117316	0.0391639
Other	nhr-36	M02418_2.00	ASH	451	193	147.214	1.31102	5.86e-06	0.0587234
Other	nsy-7	M00966_2.00	ASH	451	144	121.043	1.18966	0.0104901	0.171304
Other	ceh-48	M01905_2.00	ASH	451	218	218.969	0.995576	0.573647	0.265253
Piecemeal Regulator	ztf-11	M00650_2.00	ASI	372	247	238.984	1.03354	0.21873	2.65e-05
Coordinated Regulator	fos-1	M01144_2.00	ASI	372	143	96.3971	1.48345	1.34e-07	0.00182194
Coordinated Regulator	skn-1	M00596_2.00	ASI	372	153	120.945	1.26503	0.000373149	0.00583446
Coordinated Regulator	ztf-3	M00640_2.00	ASI	372	150	124.296	1.20679	0.00363552	0.00968538
Piecemeal Regulator	nhr-6	M01298_2.00	ASI	372	176	159.841	1.10109	0.0548714	0.011244
Coordinated Regulator	mdl-1	M08183_2.00	ASI	372	128	100.896	1.26864	0.00143057	0.033522
Piecemeal Regulator	ztf-16	M00644_2.00	ASI	372	120	113.318	1.05897	0.253556	0.0342548
Coordinated Regulator	egl-43	M00611_2.00	ASI	372	112	85.3819	1.31175	0.00105192	0.0406742
Other	ceh-90	M00677_2.00	ASI	372	181	167.265	1.08212	0.0897656	0.112207
Other	dmd-6	M00655_2.00	ASI	372	276	266.124	1.03711	0.148426	0.155335
Other	ttx-3	M02085_2.00	ASI	372	138	92.4354	1.49294	1.8e-07	0.169649
Other	unc-3	OH2011_UNC-3	ASI	372	103	75.6626	1.36131	0.000516953	0.185653
Other	ceh-74	M01248_2.00	ASI	372	101	84.5673	1.19431	0.0288185	0.18871
Other	ceh-58	M00676_2.00	ASI	372	152	122.26	1.24325	0.000902722	0.225484
Other	ceh-57	M00675_2.00	ASI	372	120	90.8247	1.32123	0.000470844	0.360789
Other	fkh-8	M03026_2.00	ASI	372	148	122.63	1.20688	0.00394647	0.360789
Other	ceh-36	M00673_2.00	ASI	372	120	86.4742	1.3877	6.03e-05	0.548842
Other	ztf-9	M00636_2.00	ASI	372	126	98.8223	1.27502	0.00131599	0.714015
Other	ceh-38	M03716_2.00	ASI	372	161	181.89	0.88515	0.995568	0.752285
Other	atf-5	M00593_2.00	ASI	372	146	113.355	1.28799	0.000247737	0.806463
Other	ceh-48	M01905_2.00	ASI	372	169	180.613	0.935704	0.91195	0.919956
Coordinated Regulator	ztf-11	M00650_2.00	ASJ	436	314	280.1	1.12103	0.000419043	3.23e-08
Coordinated Regulator	dmd-6	M00655_2.00	ASJ	436	340	311.909	1.09006	0.00161939	0.00013074
Coordinated Regulator	fkh-8	M03026_2.00	ASJ	436	182	143.728	1.26628	9.96e-05	0.000164598
Coordinated Regulator	ceh-43	M00423_2.00	ASJ	436	200	158.439	1.26232	3.65e-05	0.000579527
Coordinated Regulator	2020-06-01	M00599_2.00	ASJ	436	204	133.985	1.52256	3.79e-12	0.00169121
Coordinated Regulator	fos-1	M01144_2.00	ASJ	436	176	112.982	1.55778	6.99e-11	0.00204041
Coordinated Regulator	nhr-67	M02408_2.00	ASJ	436	157	131.555	1.19342	0.00583391	0.00932421
Coordinated Regulator	ztf-3	M00640_2.00	ASJ	436	175	145.681	1.20126	0.00224636	0.0161451
Other	ztf-9	M00636_2.00	ASJ	436	144	115.824	1.24327	0.00190515	0.0613975
Other	ceh-9	M03847_2.00	ASJ	436	192	165.144	1.16262	0.00559477	0.0714359
Other	egl-43	M00611_2.00	ASJ	436	126	100.071	1.2591	0.00270083	0.0845564
Other	tbx-2	M00830_2.00	ASJ	436	168	145.03	1.15838	0.0132373	0.0859849
Other	ceh-58	M00676_2.00	ASJ	436	199	143.294	1.38876	3.37e-08	0.121193
Other	ceh-74	M01248_2.00	ASJ	436	116	99.1166	1.17034	0.0350396	0.182402
Other	ceh-57	M00675_2.00	ASJ	436	133	106.45	1.24941	0.00259625	0.257598
Other	ceh-38	M03716_2.00	ASJ	436	196	213.183	0.919398	0.967658	0.264685
Other	nhr-36	M02418_2.00	ASJ	436	183	142.317	1.28586	3.71e-05	0.507462
Other	nsy-7	M00966_2.00	ASJ	436	139	117.017	1.18786	0.0123786	0.533866
Other	ceh-48	M01905_2.00	ASJ	436	211	211.686	0.99676	0.563714	0.60061
Other	crh-1	M03659_2.00	ASJ	436	169	111.137	1.52064	1.51e-09	0.605158
Coordinated Regulator	ztf-11	M00650_2.00	ASK	545	406	350.125	1.15959	2.9e-07	1.1e-12
Coordinated Regulator	fos-1	M01144_2.00	ASK	545	216	141.227	1.52945	3.71e-12	4.31e-10
Coordinated Regulator	dmd-6	M00655_2.00	ASK	545	433	389.886	1.11058	1.99e-05	1.41e-09
Coordinated Regulator	nhr-84	M02414_2.00	ASK	545	276	203.093	1.35898	2.6e-10	1.77e-09
Coordinated Regulator	daf-16	M01989_2.00	ASK	545	283	207.786	1.36198	8.25e-11	1.63e-07
Coordinated Regulator	ztf-3	M00640_2.00	ASK	545	246	182.101	1.3509	1.42e-08	1.94e-07
Coordinated Regulator	ztf-9	M00636_2.00	ASK	545	206	144.78	1.42285	1.05e-08	4.35e-07
Coordinated Regulator	mdl-1	M08183_2.00	ASK	545	209	147.818	1.4139	1.26e-08	9.97e-07
Coordinated Regulator	2020-06-01	M00599_2.00	ASK	545	250	167.482	1.4927	1.99e-13	1.29e-05
Coordinated Regulator	ttx-3	M02085_2.00	ASK	545	202	135.423	1.49163	3.09e-10	0.000151739
Coordinated Regulator	vab-3	M00342_2.00	ASK	545	273	205.887	1.32597	5.62e-09	0.000230148
Coordinated Regulator	ceh-74	M01248_2.00	ASK	545	177	123.896	1.42862	1.75e-07	0.00127979
Piecemeal Regulator	ceh-38	M03716_2.00	ASK	545	286	266.479	1.07326	0.0548522	0.00189893
Coordinated Regulator	ceh-58	M00676_2.00	ASK	545	249	179.117	1.39015	5.99e-10	0.00838569
Coordinated Regulator	mls-2	M03233_2.00	ASK	545	296	231.111	1.28077	2.37e-08	0.0123023
Coordinated Regulator	ceh-57	M00675_2.00	ASK	545	179	133.063	1.34523	7.39e-06	0.0137049
Coordinated Regulator	hlh-30	M00937_2.00	ASK	545	198	126.228	1.56859	6.06e-12	0.0429278
Other	ceh-48	M01905_2.00	ASK	545	293	264.607	1.1073	0.00933656	0.0543592
Other	atf-5	M00593_2.00	ASK	545	251	166.071	1.5114	3.72e-14	0.0646219
Piecemeal Regulator	ztf-11	M00650_2.00	AUA	200	117	128.486	0.910604	0.971599	4.88e-09
Piecemeal Regulator	dmd-6	M00655_2.00	AUA	200	135	143.078	0.943544	0.922939	2.51e-06
Coordinated Regulator	ceh-18	M00681_2.00	AUA	200	117	92.3858	1.26643	0.000416336	3.02e-06
Coordinated Regulator	nhr-67	M02408_2.00	AUA	200	75	60.3464	1.24283	0.0181924	0.00118214
Coordinated Regulator	ztf-3	M00640_2.00	AUA	200	84	66.8259	1.257	0.00812724	0.00578901
Coordinated Regulator	ceh-54	M02188_2.00	AUA	200	91	77.1673	1.17926	0.0306124	0.00806499
Coordinated Regulator	atf-5	M00593_2.00	AUA	200	88	60.9436	1.44396	5.38e-05	0.0234799
Other	ztf-9	M00636_2.00	AUA	200	68	53.1303	1.27987	0.0139695	0.0515837
Other	ceh-58	M00676_2.00	AUA	200	85	65.7311	1.29315	0.0033348	0.0662196
Other	syd-9	M00646_2.00	AUA	200	84	80.2329	1.04695	0.330828	0.0682287
Other	ceh-48	M01905_2.00	AUA	200	107	97.1036	1.10192	0.0989644	0.114937
Other	ceh-74	M01248_2.00	AUA	200	69	45.4663	1.51761	0.000139925	0.160036
Other	ceh-38	M03716_2.00	AUA	200	95	97.7904	0.971466	0.698204	0.401666
Other	mbr-1	M00707_2.00	AUA	200	48	33.9206	1.41507	0.00812866	0.830947
Coordinated Regulator	ztf-11	M00650_2.00	AVA	319	239	204.935	1.16622	4.01e-05	8.74e-25
Coordinated Regulator	fax-1	M06432_2.00	AVA	319	240	199.347	1.20393	1.43e-06	6.59e-19
Coordinated Regulator	ceh-18	M00681_2.00	AVA	319	211	147.355	1.43191	1.64e-12	1.21e-18
Coordinated Regulator	unc-3	OH2011_UNC-3	AVA	319	156	64.8827	2.40434	5.22e-29	3.62e-17
Coordinated Regulator	ztf-3	M00640_2.00	AVA	319	183	106.587	1.7169	7.74e-18	9.47e-16
Coordinated Regulator	tbx-2	M00830_2.00	AVA	319	161	106.111	1.51728	3.97e-10	5.08e-12
Coordinated Regulator	ceh-58	M00676_2.00	AVA	319	172	104.841	1.64058	2.8e-14	7.19e-09
Coordinated Regulator	unc-42	M03874_2.00	AVA	319	158	96.4271	1.63854	1.28e-12	8.41e-09
Coordinated Regulator	ceh-74	M01248_2.00	AVA	319	132	72.5188	1.82022	2.8e-13	1.22e-08
Coordinated Regulator	ztf-9	M00636_2.00	AVA	319	162	84.7428	1.91167	1.75e-19	1.85e-08
Coordinated Regulator	nhr-67	M02408_2.00	AVA	319	164	96.2525	1.70385	7.49e-15	3.04e-08
Coordinated Regulator	ceh-38	M03716_2.00	AVA	319	193	155.976	1.23737	2.91e-05	1.07e-07
Coordinated Regulator	ceh-48	M01905_2.00	AVA	319	194	154.88	1.25258	1.06e-05	3.04e-07
Other	nsy-7	M00966_2.00	AVA	319	148	85.616	1.72865	1.93e-13	0.127007
Coordinated Regulator	unc-3	OH2011_UNC-3	AVB	170	70	34.577	2.02447	1.27e-09	3.47e-13
Piecemeal Regulator	ztf-11	M00650_2.00	AVB	170	116	109.213	1.06214	0.166964	2.79e-08
Coordinated Regulator	fax-1	M06432_2.00	AVB	170	122	106.235	1.1484	0.00828623	1.85e-07
Coordinated Regulator	unc-42	M03874_2.00	AVB	170	77	51.3875	1.49842	3.67e-05	3.74e-06
Coordinated Regulator	ceh-58	M00676_2.00	AVB	170	79	55.8714	1.41396	0.000213978	5.94e-06
Coordinated Regulator	ceh-18	M00681_2.00	AVB	170	97	78.5279	1.23523	0.00351669	1.32e-05
Coordinated Regulator	lim-7	M01242_2.00	AVB	170	76	63.0795	1.20483	0.0285909	0.000102366
Coordinated Regulator	ztf-3	M00640_2.00	AVB	170	89	56.802	1.56685	5.26e-07	0.000136357
Coordinated Regulator	ceh-38	M03716_2.00	AVB	170	96	83.1218	1.15493	0.032291	0.00246283
Coordinated Regulator	ztf-9	M00636_2.00	AVB	170	74	45.1607	1.63859	2.29e-06	0.00261169
Coordinated Regulator	ceh-48	M01905_2.00	AVB	170	100	82.5381	1.21156	0.00550366	0.00638959
Coordinated Regulator	ceh-74	M01248_2.00	AVB	170	67	38.6464	1.73367	1.41e-06	0.00893853
Other	xbp-1	M00597_2.00	AVB	170	70	43.6802	1.60256	1.19e-05	0.324668
Coordinated Regulator	ztf-11	M00650_2.00	AVD	256	197	164.462	1.19784	1.21e-05	1.73e-25
Coordinated Regulator	cfi-1	M01667_2.00	AVD	256	201	148.015	1.35797	7.42e-12	1.94e-20
Coordinated Regulator	unc-3	OH2011_UNC-3	AVD	256	121	52.0689	2.32385	3.33e-21	3.99e-18
Coordinated Regulator	ceh-18	M00681_2.00	AVD	256	168	118.254	1.42067	7.19e-10	8.45e-18
Coordinated Regulator	pag-3	M00619_2.00	AVD	256	172	126.255	1.36233	1.21e-08	6.33e-15
Coordinated Regulator	lin-31	M00665_2.00	AVD	256	200	151.913	1.31654	3.9e-10	2.95e-14
Coordinated Regulator	unc-42	M03874_2.00	AVD	256	122	77.3835	1.57656	7.94e-09	3.46e-14
Coordinated Regulator	ztf-3	M00640_2.00	AVD	256	157	85.5372	1.83546	4.01e-19	1.86e-11
Coordinated Regulator	ceh-58	M00676_2.00	AVD	256	144	84.1358	1.71152	4.71e-14	8.4e-11
Coordinated Regulator	tab-1	M00516_2.00	AVD	256	132	71.1026	1.85647	3.45e-15	1.07e-10
Coordinated Regulator	tbx-2	M00830_2.00	AVD	256	150	85.155	1.76149	4.38e-16	5.79e-10
Coordinated Regulator	ztf-9	M00636_2.00	AVD	256	136	68.0068	1.9998	1.15e-18	6.16e-10
Coordinated Regulator	2020-06-01	M00599_2.00	AVD	256	143	78.6702	1.81771	3.56e-16	5.14e-09
Coordinated Regulator	ceh-74	M01248_2.00	AVD	256	118	58.1969	2.0276	7.19e-16	3.06e-06
Coordinated Regulator	vab-3	M00342_2.00	AVD	256	159	96.7103	1.64409	1.15e-14	1.31e-05
Coordinated Regulator	ceh-48	M01905_2.00	AVD	256	173	124.293	1.39188	1.42e-09	8.55e-05
Coordinated Regulator	ceh-38	M03716_2.00	AVD	256	167	125.172	1.33417	1.82e-07	0.000686041
Coordinated Regulator	hlh-30	M00937_2.00	AVD	256	101	59.2925	1.70342	9.13e-09	0.00935038
Other	nsy-7	M00966_2.00	AVD	256	115	68.7075	1.67376	9.45e-10	0.0844141
Coordinated Regulator	ztf-11	M00650_2.00	AVE	178	137	114.353	1.19805	0.000241263	2.55e-20
Coordinated Regulator	unc-3	OH2011_UNC-3	AVE	178	96	36.2041	2.65163	4.67e-22	1.53e-16
Coordinated Regulator	fax-1	M06432_2.00	AVE	178	135	111.234	1.21365	0.000145583	6.59e-14
Coordinated Regulator	pag-3	M00619_2.00	AVE	178	115	87.7864	1.31	4.11e-05	2.22e-12
Coordinated Regulator	unc-42	M03874_2.00	AVE	178	83	53.8057	1.54259	5.07e-06	8.59e-07
Coordinated Regulator	ztf-3	M00640_2.00	AVE	178	114	59.4751	1.91677	3.79e-16	1.34e-05
Coordinated Regulator	ceh-8	M00426_2.00	AVE	178	89	53.912	1.65084	6.16e-08	4.1e-05
Coordinated Regulator	ceh-58	M00676_2.00	AVE	178	95	58.5006	1.62391	2.93e-08	7.17e-05
Coordinated Regulator	ztf-9	M00636_2.00	AVE	178	94	47.286	1.98791	3.85e-13	0.000162271
Coordinated Regulator	ceh-74	M01248_2.00	AVE	178	81	40.465	2.00173	5.19e-11	0.000428495
Coordinated Regulator	ceh-48	M01905_2.00	AVE	178	104	86.4222	1.20339	0.00616827	0.00341064
Coordinated Regulator	ceh-38	M03716_2.00	AVE	178	108	87.0334	1.2409	0.00132237	0.00796946
Other	nsy-7	M00966_2.00	AVE	178	83	47.7732	1.73738	2.67e-08	0.435645
Coordinated Regulator	ztf-11	M00650_2.00	AVF	234	170	150.329	1.13085	0.00466011	7.62e-15
Coordinated Regulator	daf-16	M01989_2.00	AVF	234	143	89.2144	1.60288	3.09e-12	3.98e-11
Coordinated Regulator	pag-3	M00619_2.00	AVF	234	152	115.405	1.31711	1.7e-06	2.21e-10
Coordinated Regulator	ceh-58	M00676_2.00	AVF	234	127	76.9053	1.65138	3.74e-11	3.68e-08
Coordinated Regulator	ztf-3	M00640_2.00	AVF	234	143	78.1863	1.82896	2.39e-17	1.16e-07
Coordinated Regulator	ceh-74	M01248_2.00	AVF	234	107	53.1956	2.01145	2.97e-14	6.18e-07
Coordinated Regulator	2020-06-01	M00599_2.00	AVF	234	127	71.9095	1.76611	2.41e-13	7.51e-07
Coordinated Regulator	unc-3	OH2011_UNC-3	AVF	234	100	47.5942	2.1011	2.68e-14	8.56e-07
Coordinated Regulator	ztf-9	M00636_2.00	AVF	234	119	62.1624	1.91434	9.81e-15	9.68e-07
Coordinated Regulator	ceh-38	M03716_2.00	AVF	234	145	114.415	1.26732	5.59e-05	0.000147611
Coordinated Regulator	irx-1	M02064_2.00	AVF	234	88	45.4165	1.93762	1.95e-10	0.011363
Coordinated Regulator	ceh-48	M01905_2.00	AVF	234	155	113.611	1.3643	7.03e-08	0.031641
Coordinated Regulator	ztf-11	M00650_2.00	AVG	407	304	261.469	1.16266	6e-06	1.02e-28
Coordinated Regulator	pha-4	M08123_2.00	AVG	407	271	198.578	1.3647	8.85e-13	8.51e-21
Coordinated Regulator	ceh-18	M00681_2.00	AVG	407	257	188.005	1.36698	1.14e-11	9.69e-21
Coordinated Regulator	vab-15	M00555_2.00	AVG	407	213	149.501	1.42474	2.26e-10	3.54e-16
Coordinated Regulator	ztf-9	M00636_2.00	AVG	407	185	108.12	1.71106	7.4e-16	1.58e-14
Coordinated Regulator	nhr-67	M02408_2.00	AVG	407	200	122.805	1.6286	2.99e-15	1.29e-13
Coordinated Regulator	ztf-3	M00640_2.00	AVG	407	224	135.991	1.64717	1.24e-18	1.92e-13
Coordinated Regulator	ceh-48	M01905_2.00	AVG	407	238	197.606	1.20442	4.93e-05	1.15e-11
Coordinated Regulator	ceh-58	M00676_2.00	AVG	407	197	133.763	1.47276	1.33e-10	2.23e-09
Coordinated Regulator	ceh-38	M03716_2.00	AVG	407	240	199.003	1.20601	3.85e-05	2.27e-08
Coordinated Regulator	ceh-74	M01248_2.00	AVG	407	165	92.5239	1.78332	2.55e-15	9.8e-05
Coordinated Regulator	xbp-1	M00597_2.00	AVG	407	189	104.576	1.80731	6.65e-19	0.000783603
Other	irx-1	M02064_2.00	AVG	407	150	78.9937	1.89888	6.17e-16	0.0560491
Other	tra-1	DZ2013_TRA-1	AVG	407	164	98.4383	1.66602	1.31e-12	0.0715594
Other	mdl-1	M08183_2.00	AVG	407	173	110.389	1.56719	3.9e-11	0.108211
Other	nsy-7	M00966_2.00	AVG	407	168	109.234	1.53798	4.3e-10	0.81581
Piecemeal Regulator	ztf-11	M00650_2.00	AVH	198	131	127.201	1.02986	0.327699	5.29e-09
Piecemeal Regulator	pag-3	M00619_2.00	AVH	198	107	97.65	1.09575	0.111884	1.43e-07
Coordinated Regulator	nhr-6	M01298_2.00	AVH	198	110	85.0767	1.29295	0.00032787	3.45e-07
Coordinated Regulator	ceh-18	M00681_2.00	AVH	198	118	91.4619	1.29015	0.000144207	8.43e-07
Coordinated Regulator	2020-06-01	M00599_2.00	AVH	198	95	60.8465	1.56131	5.16e-07	1.39e-06
Coordinated Regulator	ztf-9	M00636_2.00	AVH	198	79	52.599	1.50193	4.42e-05	3.28e-06
Coordinated Regulator	ztf-3	M00640_2.00	AVH	198	92	66.1577	1.39062	0.000131805	2.03e-05
Coordinated Regulator	unc-42	M03874_2.00	AVH	198	83	59.8513	1.38677	0.000419162	9.71e-05
Coordinated Regulator	tbx-2	M00830_2.00	AVH	198	95	65.862	1.44241	1.93e-05	0.000177855
Coordinated Regulator	ceh-58	M00676_2.00	AVH	198	85	65.0738	1.30621	0.00240073	0.00121849
Piecemeal Regulator	ceh-38	M03716_2.00	AVH	198	107	96.8125	1.10523	0.0908677	0.0382486
Coordinated Regulator	ceh-74	M01248_2.00	AVH	198	72	45.0116	1.59959	1.52e-05	0.0384497
Other	xbp-1	M00597_2.00	AVH	198	86	50.8746	1.69043	8.95e-08	0.224929
Other	ceh-48	M01905_2.00	AVH	198	107	96.1326	1.11305	0.0761153	0.360789
Other	nsy-7	M00966_2.00	AVH	198	78	53.1409	1.46779	0.000114917	0.586873
Coordinated Regulator	ztf-11	M00650_2.00	AVJ	341	248	219.069	1.13206	0.000659718	7.34e-14
Coordinated Regulator	pag-3	M00619_2.00	AVJ	341	204	168.175	1.21302	8.43e-05	1.45e-11
Coordinated Regulator	ztf-3	M00640_2.00	AVJ	341	178	113.938	1.56225	2.05e-12	1.31e-10
Coordinated Regulator	2020-06-01	M00599_2.00	AVJ	341	156	104.791	1.48867	8.3e-09	9.61e-10
Coordinated Regulator	ztf-9	M00636_2.00	AVJ	341	141	90.5871	1.55651	4.76e-09	2.62e-08
Coordinated Regulator	mls-2	M03233_2.00	AVJ	341	188	144.603	1.30011	2.34e-06	1.68e-07
Coordinated Regulator	ceh-58	M00676_2.00	AVJ	341	151	112.071	1.34735	1.05e-05	3e-07
Coordinated Regulator	unc-30	M01241_2.00	AVJ	341	146	86.7519	1.68296	5.92e-12	1.17e-06
Coordinated Regulator	ztf-14	M00628_2.00	AVJ	341	133	78.5892	1.69234	7.6e-11	4.6e-05
Coordinated Regulator	ceh-38	M03716_2.00	AVJ	341	189	166.733	1.13355	0.0104901	0.00157329
Coordinated Regulator	ceh-74	M01248_2.00	AVJ	341	129	77.5201	1.66409	5.51e-10	0.00226098
Coordinated Regulator	ceh-48	M01905_2.00	AVJ	341	203	165.562	1.22613	4.16e-05	0.0106145
Coordinated Regulator	hlh-30	M00937_2.00	AVJ	341	115	78.9795	1.45607	8.77e-06	0.0171118
Coordinated Regulator	mdl-1	M08183_2.00	AVJ	341	129	92.4878	1.39478	1.53e-05	0.043871
Other	xbp-1	M00597_2.00	AVJ	341	139	87.6173	1.58644	1.88e-09	0.215858
Coordinated Regulator	unc-42	M03874_2.00	AVK	104	54	31.437	1.71772	5.4e-06	1.57e-08
Coordinated Regulator	nhr-6	M01298_2.00	AVK	104	56	44.6868	1.25317	0.0191395	9.78e-07
Coordinated Regulator	ceh-18	M00681_2.00	AVK	104	66	48.0406	1.37384	0.000398719	1.06e-05
Coordinated Regulator	ztf-9	M00636_2.00	AVK	104	45	27.6277	1.6288	0.000240054	5.7e-05
Coordinated Regulator	fax-1	M06432_2.00	AVK	104	79	64.9909	1.21555	0.00307266	0.000136806
Coordinated Regulator	ztf-3	M00640_2.00	AVK	104	57	34.7495	1.64031	9.76e-06	0.000756113
Coordinated Regulator	ztf-11	M00650_2.00	AVK	104	78	66.8128	1.16744	0.0149698	0.00427675
Coordinated Regulator	ceh-38	M03716_2.00	AVK	104	60	50.851	1.17992	0.0497245	0.00473778
Coordinated Regulator	ceh-58	M00676_2.00	AVK	104	55	34.1802	1.60912	3.1e-05	0.0189094
Other	ceh-48	M01905_2.00	AVK	104	62	50.4939	1.22787	0.0178099	0.0809349
Other	ceh-74	M01248_2.00	AVK	104	39	23.6425	1.64957	0.000642975	0.115815
Coordinated Regulator	ztf-11	M00650_2.00	AVL	344	237	220.996	1.07242	0.0431383	7.81e-18
Coordinated Regulator	pha-4	M08123_2.00	AVL	344	222	167.84	1.32269	5.94e-09	9.16e-14
Coordinated Regulator	mab-5	M01240_2.00	AVL	344	197	167.275	1.1777	0.000980552	2.66e-08
Coordinated Regulator	ceh-58	M00676_2.00	AVL	344	162	113.057	1.4329	5.52e-08	2.74e-07
Coordinated Regulator	ceh-74	M01248_2.00	AVL	344	118	78.2021	1.50891	1.09e-06	3.35e-07
Coordinated Regulator	ztf-3	M00640_2.00	AVL	344	177	114.941	1.53993	1.12e-11	3.84e-07
Coordinated Regulator	ztf-9	M00636_2.00	AVL	344	141	91.3841	1.54294	9.01e-09	4.33e-07
Coordinated Regulator	lim-6	M00432_2.00	AVL	344	138	90.22	1.52959	2.57e-08	1.6e-06
Coordinated Regulator	ceh-38	M03716_2.00	AVL	344	200	168.199	1.18906	0.000451154	3.3e-06
Coordinated Regulator	ceh-48	M01905_2.00	AVL	344	207	167.018	1.23939	1.41e-05	3.48e-06
Coordinated Regulator	nhr-67	M02408_2.00	AVL	344	151	103.796	1.45478	9.3e-08	0.00164949
Coordinated Regulator	mxl-3	M00935_2.00	AVL	344	107	81.5061	1.31278	0.0012393	0.00662084
Coordinated Regulator	ztf-11	M00650_2.00	AVM	248	197	159.323	1.23648	2.59e-07	1.2e-22
Coordinated Regulator	unc-86	M03312_2.00	AVM	248	215	170.974	1.2575	1.69e-10	2.62e-20
Coordinated Regulator	hsf-1	M00682_2.00	AVM	248	192	146.24	1.31291	1.62e-09	1.43e-19
Coordinated Regulator	pag-3	M00619_2.00	AVM	248	167	122.309	1.36539	1.53e-08	8.25e-14
Coordinated Regulator	unc-86	M02244_2.00	AVM	248	131	71.4601	1.83319	8.12e-15	6.39e-11
Coordinated Regulator	ceh-18	M00681_2.00	AVM	248	166	114.558	1.44904	9.81e-11	7.97e-09
Coordinated Regulator	ztf-3	M00640_2.00	AVM	248	162	82.8641	1.95501	1.04e-23	3.06e-08
Coordinated Regulator	ceh-74	M01248_2.00	AVM	248	105	56.3782	1.86242	1.55e-11	3.77e-08
Coordinated Regulator	ztf-9	M00636_2.00	AVM	248	120	65.8816	1.82145	5.88e-13	8.93e-08
Coordinated Regulator	ceh-58	M00676_2.00	AVM	248	135	81.5065	1.65631	6.85e-12	6.55e-07
Coordinated Regulator	unc-62	M02185_2.00	AVM	248	137	79.359	1.72633	1.34e-13	8.48e-07
Coordinated Regulator	lin-39	M08211_2.00	AVM	248	151	103.216	1.46295	1.82e-09	1.36e-06
Coordinated Regulator	ceh-38	M03716_2.00	AVM	248	144	121.26	1.18753	0.00283354	0.000164807
Coordinated Regulator	ceh-48	M01905_2.00	AVM	248	155	120.408	1.28728	1.05e-05	0.0195377
Other	hlh-30	M00937_2.00	AVM	248	92	57.4396	1.60168	9.63e-07	0.968492
Coordinated Regulator	nhr-216	M00705_2.00	AWA	386	252	186.507	1.35115	3.38e-11	4.35e-12
Coordinated Regulator	odr-7	M00697_2.00	AWA	386	245	192.846	1.27044	1.04e-07	2.04e-08
Coordinated Regulator	ztf-11	M00650_2.00	AWA	386	268	247.978	1.08074	0.0203084	3.77e-07
Piecemeal Regulator	dmd-6	M00655_2.00	AWA	386	291	276.14	1.05381	0.0550556	4.51e-07
Coordinated Regulator	atf-7	M00595_2.00	AWA	386	195	130.684	1.49215	2.89e-11	1.58e-05
Coordinated Regulator	ceh-54	M02188_2.00	AWA	386	184	148.933	1.23546	0.000221267	1.65e-05
Coordinated Regulator	ceh-36	M00673_2.00	AWA	386	154	89.7286	1.71629	6.3e-13	0.000178197
Coordinated Regulator	ceh-37	M00674_2.00	AWA	386	169	101.677	1.66213	3e-13	0.000537347
Coordinated Regulator	ceh-74	M01248_2.00	AWA	386	126	87.75	1.4359	7.54e-06	0.00142492
Coordinated Regulator	ztf-9	M00636_2.00	AWA	386	144	102.541	1.40431	3.65e-06	0.00722188
Coordinated Regulator	ceh-58	M00676_2.00	AWA	386	170	126.861	1.34005	4.5e-06	0.00938701
Coordinated Regulator	ztf-3	M00640_2.00	AWA	386	174	128.974	1.34911	1.94e-06	0.0183295
Coordinated Regulator	egl-5	M09581_2.00	AWA	386	229	193.461	1.1837	0.000221867	0.0186221
Coordinated Regulator	atf-5	M00593_2.00	AWA	386	172	117.621	1.46232	7.51e-09	0.0277616
Coordinated Regulator	ceh-23	M00671_2.00	AWA	386	197	162.706	1.21077	0.000335534	0.0387903
Other	ceh-1	M00557_2.00	AWA	386	154	110.744	1.39059	2.25e-06	0.0537993
Other	ceh-48	M01905_2.00	AWA	386	178	187.41	0.949789	0.862598	0.223411
Other	ceh-38	M03716_2.00	AWA	386	180	188.735	0.953716	0.846543	0.304075
Other	nsy-7	M00966_2.00	AWA	386	131	103.598	1.2645	0.00148147	0.500732
Coordinated Regulator	ztf-11	M00650_2.00	AWB	230	173	147.759	1.17083	0.000317	9.4e-06
Coordinated Regulator	nhr-67	M02408_2.00	AWB	230	95	69.3983	1.36891	0.000291281	1.64e-05
Coordinated Regulator	ceh-18	M00681_2.00	AWB	230	144	106.244	1.35538	7.21e-07	3.3e-05
Coordinated Regulator	fkh-2	M01974_2.00	AWB	230	148	104.206	1.42026	1.05e-08	5.24e-05
Coordinated Regulator	mef-2	M02745_2.00	AWB	230	174	135.889	1.28045	1.84e-07	7.12e-05
Coordinated Regulator	ztf-3	M00640_2.00	AWB	230	124	76.8498	1.61354	3.42e-10	0.00032558
Coordinated Regulator	ceh-37	M00674_2.00	AWB	230	115	60.5848	1.89817	6.33e-14	0.000724826
Coordinated Regulator	daf-19	M00709_2.00	AWB	230	77	46.3571	1.66102	2.52e-06	0.00147612
Coordinated Regulator	atf-5	M00593_2.00	AWB	230	98	70.0851	1.3983	9.25e-05	0.0101055
Coordinated Regulator	lim-4	M02182_2.00	AWB	230	115	80.7415	1.4243	4.05e-06	0.0113483
Coordinated Regulator	dmd-9	M00661_2.00	AWB	230	80	44.5143	1.79718	5.53e-08	0.039673
Other	ceh-74	M01248_2.00	AWB	230	90	52.2863	1.72129	3.62e-08	0.148366
Other	ceh-9	M03847_2.00	AWB	230	118	87.117	1.3545	3.45e-05	0.213418
Other	ceh-58	M00676_2.00	AWB	230	114	75.5907	1.50812	2.18e-07	0.258336
Other	ztf-9	M00636_2.00	AWB	230	104	61.0998	1.70213	2.17e-09	0.35427
Other	ceh-38	M03716_2.00	AWB	230	120	112.459	1.06706	0.186961	0.368231
Other	tbx-2	M00830_2.00	AWB	230	99	76.5064	1.29401	0.00154279	0.502743
Other	ceh-48	M01905_2.00	AWB	230	127	111.669	1.13729	0.0283816	0.643825
Coordinated Regulator	ztf-11	M00650_2.00	AWC	433	298	278.172	1.07128	0.0280316	4.51e-16
Piecemeal Regulator	dmd-6	M00655_2.00	AWC	433	321	309.763	1.03628	0.133067	4.25e-14
Piecemeal Regulator	die-1	M00610_2.00	AWC	433	364	371.974	0.978563	0.896408	7.76e-14
Coordinated Regulator	gei-3	M00711_2.00	AWC	433	203	147.156	1.37949	3.41e-08	2.91e-11
Coordinated Regulator	atf-7	M00595_2.00	AWC	433	226	146.596	1.54165	1.04e-14	4.36e-10
Coordinated Regulator	nhr-6	M01298_2.00	AWC	433	248	186.052	1.33296	2.94e-09	4.43e-10
Coordinated Regulator	ztf-3	M00640_2.00	AWC	433	220	144.678	1.52062	1.79e-13	6.17e-08
Coordinated Regulator	ceh-18	M00681_2.00	AWC	433	264	200.015	1.3199	9.44e-10	7.9e-08
Coordinated Regulator	ceh-36	M00673_2.00	AWC	433	217	100.654	2.1559	4.57e-33	9.14e-08
Coordinated Regulator	ceh-54	M02188_2.00	AWC	433	218	167.067	1.30486	6.85e-07	1.39e-07
Coordinated Regulator	ceh-58	M00676_2.00	AWC	433	195	142.308	1.37027	1.47e-07	3.37e-06
Coordinated Regulator	ceh-23	M00671_2.00	AWC	433	230	182.518	1.26015	4.04e-06	6.03e-06
Coordinated Regulator	atf-5	M00593_2.00	AWC	433	191	131.943	1.4476	2.93e-09	8.04e-06
Coordinated Regulator	ceh-74	M01248_2.00	AWC	433	155	98.4346	1.57465	9.92e-10	1.19e-05
Coordinated Regulator	daf-16	M01989_2.00	AWC	433	232	165.085	1.40534	1.08e-10	2.05e-05
Coordinated Regulator	tbx-2	M00830_2.00	AWC	433	192	144.032	1.33304	1.57e-06	7.6e-05
Coordinated Regulator	mxl-3	M00935_2.00	AWC	433	140	102.593	1.36461	3.59e-05	9.43e-05
Coordinated Regulator	lim-7	M01242_2.00	AWC	433	202	160.667	1.25726	4e-05	0.000126003
Coordinated Regulator	ztf-9	M00636_2.00	AWC	433	185	115.027	1.60832	7.03e-13	0.000136357
Coordinated Regulator	daf-19	M00709_2.00	AWC	433	140	87.2723	1.60417	3.25e-09	0.00146309
Coordinated Regulator	dmd-9	M00661_2.00	AWC	433	131	83.803	1.56319	6.26e-08	0.00370279
Piecemeal Regulator	ceh-38	M03716_2.00	AWC	433	224	211.716	1.05802	0.135754	0.015615
Coordinated Regulator	dsc-1	M02063_2.00	AWC	433	160	106.946	1.49608	1.74e-08	0.0221654
Coordinated Regulator	nhr-36	M02418_2.00	AWC	433	206	141.338	1.4575	1.69e-10	0.0283152
Coordinated Regulator	hlh-30	M00937_2.00	AWC	433	156	100.288	1.55552	2.03e-09	0.0304461
Other	ceh-48	M01905_2.00	AWC	433	230	210.229	1.09404	0.0347957	0.0540238
Other	nsy-7	M00966_2.00	AWC	433	163	116.212	1.40261	9.08e-07	0.994711
Coordinated Regulator	ztf-11	M00650_2.00	BAG	263	198	168.959	1.17188	0.000112102	1.2e-22
Coordinated Regulator	dmd-6	M00655_2.00	BAG	263	219	188.147	1.16398	1.02e-05	1.39e-16
Coordinated Regulator	egl-13	M00710_2.00	BAG	263	204	153.397	1.32988	1.06e-10	3.06e-15
Coordinated Regulator	nhr-6	M01298_2.00	BAG	263	178	113.006	1.57514	2.4e-15	8.13e-14
Coordinated Regulator	gei-3	M00711_2.00	BAG	263	145	89.3813	1.62226	5.19e-12	4.15e-13
Coordinated Regulator	ceh-37	M00674_2.00	BAG	263	159	69.2773	2.29512	4.57e-30	1.11e-11
Coordinated Regulator	daf-16	M01989_2.00	BAG	263	167	100.271	1.66549	3.7e-16	1.37e-10
Coordinated Regulator	ztf-3	M00640_2.00	BAG	263	161	87.8761	1.83213	1.8e-19	6.77e-08
Coordinated Regulator	ceh-54	M02188_2.00	BAG	263	150	101.475	1.4782	2.46e-09	1.06e-07
Coordinated Regulator	ceh-74	M01248_2.00	BAG	263	120	59.7882	2.00709	1.02e-15	5.24e-07
Coordinated Regulator	dmd-9	M00661_2.00	BAG	263	94	50.9011	1.84672	8.59e-10	8.75e-07
Coordinated Regulator	ztf-9	M00636_2.00	BAG	263	133	69.8663	1.90364	4.82e-16	1.11e-05
Coordinated Regulator	lim-7	M01242_2.00	BAG	263	148	97.5877	1.51658	5.24e-10	8.08e-05
Coordinated Regulator	ceh-58	M00676_2.00	BAG	263	137	86.4363	1.58498	2.49e-10	0.00013599
Coordinated Regulator	2020-06-01	M00599_2.00	BAG	263	152	80.8214	1.88069	6.34e-19	0.000206357
Coordinated Regulator	atf-5	M00593_2.00	BAG	263	156	80.1408	1.94657	2.91e-21	0.00113609
Coordinated Regulator	ceh-23	M00671_2.00	BAG	263	160	110.859	1.44327	1.9e-09	0.00765471
Coordinated Regulator	mbr-1	M00707_2.00	BAG	263	79	44.6056	1.77108	2.12e-07	0.0123023
Coordinated Regulator	vab-3	M00342_2.00	BAG	263	165	99.3547	1.66072	1.02e-15	0.0179047
Other	ceh-48	M01905_2.00	BAG	263	151	127.691	1.18254	0.00293066	0.0614166
Other	ceh-38	M03716_2.00	BAG	263	148	128.594	1.15091	0.0113568	0.194438
Coordinated Regulator	unc-86	M03312_2.00	BDU	259	228	178.557	1.2769	1.54e-12	1.2e-27
Coordinated Regulator	ceh-14	M00435_2.00	BDU	259	195	148.783	1.31064	3.64e-09	1.21e-24
Coordinated Regulator	ztf-11	M00650_2.00	BDU	259	220	166.39	1.3222	3.27e-13	2.73e-22
Coordinated Regulator	pag-3	M00619_2.00	BDU	259	189	127.734	1.47964	2.97e-14	2.09e-18
Coordinated Regulator	nhr-6	M01298_2.00	BDU	259	193	111.287	1.73425	6.47e-24	6.82e-17
Coordinated Regulator	ceh-43	M00423_2.00	BDU	259	164	94.1185	1.74248	6.27e-18	9.03e-15
Coordinated Regulator	ceh-18	M00681_2.00	BDU	259	197	119.64	1.64661	8.73e-22	9.95e-14
Coordinated Regulator	ztf-3	M00640_2.00	BDU	259	171	86.5396	1.97597	1.05e-25	4.17e-12
Coordinated Regulator	unc-62	M02185_2.00	BDU	259	153	82.879	1.84607	1.73e-18	5.8e-09
Coordinated Regulator	unc-86	M02244_2.00	BDU	259	141	74.6297	1.88933	2.99e-17	6.96e-09
Coordinated Regulator	ceh-58	M00676_2.00	BDU	259	162	85.1217	1.90316	1.09e-21	6.31e-08
Coordinated Regulator	ztf-9	M00636_2.00	BDU	259	145	68.8037	2.10744	1.29e-22	1.13e-07
Coordinated Regulator	ceh-38	M03716_2.00	BDU	259	167	126.639	1.31871	5.47e-07	8.58e-07
Coordinated Regulator	ceh-74	M01248_2.00	BDU	259	131	58.8789	2.22491	1.06e-21	8.32e-05
Coordinated Regulator	hlh-30	M00937_2.00	BDU	259	118	59.9874	1.96708	7.81e-15	0.00020092
Coordinated Regulator	ceh-48	M01905_2.00	BDU	259	169	125.749	1.34395	8.43e-08	0.00159129
Coordinated Regulator	crh-1	M03659_2.00	BDU	259	153	66.0196	2.31749	4.2e-29	0.00582515
Coordinated Regulator	ceh-48	M01905_2.00	CAN	1166	608	566.114	1.07399	0.00766835	6.69e-15
Coordinated Regulator	ceh-38	M03716_2.00	CAN	1166	614	570.118	1.07697	0.00548564	3.45e-11
Piecemeal Regulator	ztf-3	M00640_2.00	CAN	1166	382	389.595	0.980505	0.714956	4.72e-06
Piecemeal Regulator	lin-15B	M09654_2.0	CAN	1166	411	391.104	1.05087	0.116966	1.76e-05
Piecemeal Regulator	nhr-66	M00694_2.00	CAN	1166	424	495.437	0.85581	1	5.04e-05
Piecemeal Regulator	ceh-43	M00423_2.00	CAN	1166	377	423.715	0.889749	1	0.000280743
Piecemeal Regulator	ztf-9	M00636_2.00	CAN	1166	265	309.75	0.85553	1	0.000301607
Piecemeal Regulator	ztf-2	M01866_2.00	CAN	1166	372	469.731	0.791943	1	0.000406087
Piecemeal Regulator	eor-1	M01865_2.00	CAN	1166	214	229.962	0.930588	0.90993	0.00184549
Piecemeal Regulator	ceh-58	M00676_2.00	CAN	1166	347	383.212	0.905504	0.997429	0.00394206
Piecemeal Regulator	ztf-11	M00650_2.00	CAN	1166	630	749.074	0.841038	1	0.00450695
Other	ceh-74	M01248_2.00	CAN	1166	233	265.069	0.879018	0.997429	0.0714359
Other	ceh-10	M00287_2.00	CAN	1166	440	446.346	0.985783	0.682617	0.1024
Other	mdl-1	M08183_2.00	CAN	1166	297	316.249	0.939134	0.922939	0.392665
Other	ceh-23	M00671_2.00	CAN	1166	446	491.491	0.907443	1	0.451942
Other	hlh-11	M00931_2.00	CAN	1166	320	369.053	0.867083	1	0.547548
Other	nsy-7	M00966_2.00	CAN	1166	295	312.941	0.942669	0.910573	0.647859
Piecemeal Regulator	ztf-11	M00650_2.00	CEP	291	191	186.947	1.02168	0.347045	7.67e-11
Coordinated Regulator	fax-1	M06432_2.00	CEP	291	197	181.85	1.08331	0.0406954	1.06e-06
Coordinated Regulator	ceh-43	M00423_2.00	CEP	291	134	105.747	1.26717	0.000533616	3.42e-06
Coordinated Regulator	egl-43	M00611_2.00	CEP	291	95	66.7907	1.42235	0.000133458	2.28e-05
Coordinated Regulator	ztf-3	M00640_2.00	CEP	291	145	97.2317	1.49128	1.12e-08	8.28e-05
Coordinated Regulator	daf-19	M00709_2.00	CEP	291	96	58.6518	1.63678	3.34e-07	9.6e-05
Coordinated Regulator	ceh-48	M01905_2.00	CEP	291	175	141.286	1.23862	6.53e-05	0.000140929
Coordinated Regulator	ceh-74	M01248_2.00	CEP	291	95	66.1535	1.43605	9.34e-05	0.000320864
Coordinated Regulator	ceh-38	M03716_2.00	CEP	291	177	142.285	1.24398	4.02e-05	0.000418069
Coordinated Regulator	ztf-9	M00636_2.00	CEP	291	104	77.3046	1.34533	0.000455933	0.00501948
Coordinated Regulator	nhr-84	M02414_2.00	CEP	291	132	108.441	1.21725	0.00336301	0.0078198
Other	nhr-67	M02408_2.00	CEP	291	110	87.804	1.25279	0.00384033	0.103439
Other	cey-1	M01903_2.00	CEP	291	89	62.113	1.43287	0.000189427	0.145104
Other	ceh-58	M00676_2.00	CEP	291	114	95.6387	1.19199	0.0156572	0.34638
Other	nsy-7	M00966_2.00	CEP	291	92	78.1011	1.17796	0.0436064	0.549904
Other	mdl-1	M08183_2.00	CEP	291	102	78.9265	1.29234	0.00218311	0.591577
Other	vab-3	M00342_2.00	CEP	291	127	109.932	1.15526	0.0261074	0.821121
Coordinated Regulator	ztf-11	M00650_2.00	DA	901	689	578.83	1.19033	2.79e-15	4.15e-66
Coordinated Regulator	cfi-1	M01667_2.00	DA	901	692	520.942	1.32836	1.04e-32	1.38e-53
Coordinated Regulator	unc-3	OH2011_UNC-3	DA	901	437	183.258	2.38462	1.74e-80	2.54e-48
Coordinated Regulator	ceh-38	M03716_2.00	DA	901	629	440.546	1.42777	8.18e-37	5.27e-46
Coordinated Regulator	ztf-3	M00640_2.00	DA	901	563	301.051	1.87012	1.66e-71	5.13e-45
Coordinated Regulator	ceh-18	M00681_2.00	DA	901	604	416.198	1.45123	3.05e-36	1.25e-44
Coordinated Regulator	gei-3	M00711_2.00	DA	901	496	306.207	1.61982	3.4e-38	1.47e-44
Coordinated Regulator	mab-5	M01240_2.00	DA	901	607	438.124	1.38545	9.43e-30	3.48e-44
Coordinated Regulator	egl-5	M09581_2.00	DA	901	633	451.576	1.40176	2.38e-34	1.11e-39
Coordinated Regulator	ceh-48	M01905_2.00	DA	901	630	437.452	1.44016	2.5e-38	1.95e-38
Coordinated Regulator	lin-39	M08211_2.00	DA	901	561	374.991	1.49604	1.63e-35	6.68e-38
Coordinated Regulator	daf-16	M01989_2.00	DA	901	543	343.514	1.58072	6.05e-41	3.74e-28
Coordinated Regulator	cey-1	M01903_2.00	DA	901	397	192.316	2.06432	7.66e-53	4.72e-27
Coordinated Regulator	ceh-58	M00676_2.00	DA	901	469	296.118	1.58383	2.05e-32	1.86e-23
Coordinated Regulator	ztf-9	M00636_2.00	DA	901	445	239.352	1.85919	2.17e-48	3.66e-23
Coordinated Regulator	egl-27	M08205_2.00	DA	901	565	399.338	1.41484	1.8e-28	1.14e-21
Coordinated Regulator	unc-62	M02185_2.00	DA	901	473	288.316	1.64056	6.56e-37	3.09e-19
Coordinated Regulator	ceh-13	M00450_2.00	DA	901	459	296.432	1.54841	6.22e-29	1.48e-18
Coordinated Regulator	ceh-74	M01248_2.00	DA	901	411	204.826	2.00658	4.99e-52	2.61e-15
Coordinated Regulator	hlh-30	M00937_2.00	DA	901	362	208.682	1.7347	5.56e-30	3.99e-05
Coordinated Regulator	lin-15B	M09654_2.0	DA	901	480	302.217	1.58826	6.88e-34	0.000403013
Coordinated Regulator	tra-1	DZ2013_TRA-1	DA	901	419	217.919	1.92273	2.51e-48	0.014401
Other	nsy-7	M00966_2.00	DA	901	410	241.818	1.69549	3.97e-33	0.447079
Coordinated Regulator	ztf-11	M00650_2.00	DB	1280	897	822.311	1.09083	5.41e-06	2.76e-65
Coordinated Regulator	ztf-6	M00631_2.00	DB	1280	879	744.596	1.18051	5.41e-15	6.16e-51
Coordinated Regulator	ceh-48	M01905_2.00	DB	1280	832	621.463	1.33878	7.54e-33	1.01e-49
Coordinated Regulator	ceh-18	M00681_2.00	DB	1280	777	591.269	1.31412	9.21e-26	5.11e-49
Coordinated Regulator	unc-3	OH2011_UNC-3	DB	1280	523	260.344	2.00888	5.08e-65	6.4e-48
Coordinated Regulator	ztf-3	M00640_2.00	DB	1280	698	427.686	1.63204	1.88e-55	1.09e-46
Coordinated Regulator	ceh-38	M03716_2.00	DB	1280	836	625.858	1.33577	9e-33	6.32e-46
Coordinated Regulator	mab-5	M01240_2.00	DB	1280	808	622.419	1.29816	8.24e-26	1.02e-42
Coordinated Regulator	gei-3	M00711_2.00	DB	1280	617	435.011	1.41835	3.85e-26	1.26e-41
Coordinated Regulator	lin-39	M08211_2.00	DB	1280	728	532.728	1.36655	1.63e-28	3.66e-37
Coordinated Regulator	syd-9	M00646_2.00	DB	1280	642	513.491	1.25027	1.93e-13	8e-35
Coordinated Regulator	cey-1	M01903_2.00	DB	1280	479	273.212	1.75322	3.28e-40	2.46e-29
Coordinated Regulator	daf-16	M01989_2.00	DB	1280	688	488.01	1.40981	3.11e-30	7.29e-28
Coordinated Regulator	ceh-58	M00676_2.00	DB	1280	577	420.679	1.37159	4.5e-20	2.18e-24
Coordinated Regulator	ztf-9	M00636_2.00	DB	1280	532	340.034	1.56455	8.15e-32	2.86e-24
Coordinated Regulator	vab-7	M02186_2.00	DB	1280	763	607.322	1.25634	1.28e-18	1.61e-23
Coordinated Regulator	unc-62	M02185_2.00	DB	1280	573	409.595	1.39894	5.88e-22	1.57e-20
Coordinated Regulator	ceh-13	M00450_2.00	DB	1280	573	421.125	1.36064	4.64e-19	1.62e-19
Coordinated Regulator	egl-27	M08205_2.00	DB	1280	711	567.318	1.25327	4.1e-16	3.94e-19
Coordinated Regulator	crh-2	M00603_2.00	DB	1280	553	385.643	1.43397	1.83e-23	3.22e-14
Coordinated Regulator	vab-3	M00342_2.00	DB	1280	653	483.551	1.35043	2.72e-22	8.01e-14
Coordinated Regulator	ceh-74	M01248_2.00	DB	1280	499	290.984	1.71487	1e-39	1.18e-12
Coordinated Regulator	mbr-1	M00707_2.00	DB	1280	391	217.092	1.80108	9.96e-34	4.24e-11
Coordinated Regulator	lin-15B	M09654_2.0	DB	1280	639	429.342	1.48832	4.05e-34	1.8e-06
Other	hlh-11	M00931_2.00	DB	1280	594	405.136	1.46617	9.65e-29	0.169845
Other	nsy-7	M00966_2.00	DB	1280	505	343.537	1.47	3.99e-23	0.500204
Coordinated Regulator	nob-1	M01245_2.00	DVA	151	124	96.3908	1.28643	1.21e-06	6.12e-10
Coordinated Regulator	ztf-11	M00650_2.00	DVA	151	120	97.007	1.23702	5.19e-05	7.51e-08
Coordinated Regulator	php-3	M00554_2.00	DVA	151	106	70.2623	1.50863	8.12e-09	1.96e-07
Coordinated Regulator	nhr-6	M01298_2.00	DVA	151	99	64.8818	1.52585	3.97e-08	7.31e-07
Coordinated Regulator	fax-1	M06432_2.00	DVA	151	117	94.3618	1.23991	8.56e-05	4.38e-06
Coordinated Regulator	ceh-18	M00681_2.00	DVA	151	103	69.7513	1.47668	7.97e-08	4.38e-05
Coordinated Regulator	ceh-74	M01248_2.00	DVA	151	67	34.3271	1.95181	7.89e-09	0.000877324
Coordinated Regulator	ztf-9	M00636_2.00	DVA	151	63	40.1134	1.57055	5.68e-05	0.00106664
Coordinated Regulator	unc-3	OH2011_UNC-3	DVA	151	64	30.7125	2.08384	1.67e-09	0.00108584
Coordinated Regulator	ceh-58	M00676_2.00	DVA	151	90	49.627	1.81353	4.6e-11	0.00118576
Coordinated Regulator	unc-62	M02185_2.00	DVA	151	84	48.3194	1.73843	4.4e-09	0.0014565
Coordinated Regulator	ztf-3	M00640_2.00	DVA	151	91	50.4536	1.80364	4.21e-11	0.0023421
Coordinated Regulator	nhr-67	M02408_2.00	DVA	151	80	45.5615	1.75587	1.02e-08	0.00312709
Coordinated Regulator	nsy-7	M00966_2.00	DVA	151	74	40.5267	1.82596	1.22e-08	0.0048795
Other	mdl-1	M08183_2.00	DVA	151	53	40.955	1.2941	0.0219128	0.0533678
Other	ceh-38	M03716_2.00	DVA	151	90	73.8317	1.21899	0.00635094	0.557384
Other	ceh-48	M01905_2.00	DVA	151	95	73.3132	1.29581	0.00036081	0.965751
Coordinated Regulator	fkh-9	M00663_2.00	DVB	390	321	301.302	1.06538	0.0100485	2.1e-21
Piecemeal Regulator	ztf-11	M00650_2.00	DVB	390	261	250.548	1.04172	0.154457	2.69e-19
Coordinated Regulator	pha-4	M08123_2.00	DVB	390	252	190.284	1.32434	4.77e-10	1.32e-13
Coordinated Regulator	ceh-18	M00681_2.00	DVB	390	228	180.152	1.2656	1.21e-06	1.59e-08
Coordinated Regulator	lim-6	M00432_2.00	DVB	390	151	102.284	1.47628	7.93e-08	3.66e-08
Coordinated Regulator	egl-5	M09581_2.00	DVB	390	228	195.466	1.16644	0.0006975	5.45e-08
Coordinated Regulator	ceh-38	M03716_2.00	DVB	390	244	190.691	1.27956	6.76e-08	2e-07
Coordinated Regulator	ztf-3	M00640_2.00	DVB	390	198	130.311	1.51945	3.16e-12	2.68e-07
Coordinated Regulator	ceh-48	M01905_2.00	DVB	390	231	189.352	1.21995	2.05e-05	6.07e-07
Coordinated Regulator	ceh-58	M00676_2.00	DVB	390	174	128.176	1.35751	1.36e-06	6.12e-07
Coordinated Regulator	syd-9	M00646_2.00	DVB	390	183	156.454	1.16967	0.00435088	6.12e-07
Coordinated Regulator	ztf-9	M00636_2.00	DVB	390	157	103.604	1.51538	5.65e-09	5.04e-06
Coordinated Regulator	atf-5	M00593_2.00	DVB	390	158	118.84	1.32952	2.25e-05	0.000133408
Coordinated Regulator	ceh-74	M01248_2.00	DVB	390	138	88.6593	1.55652	1.77e-08	0.000416442
Coordinated Regulator	xbp-1	M00597_2.00	DVB	390	160	100.208	1.59669	6.58e-11	0.00625049
Other	lin-15B	M09654_2.0	DVB	390	177	130.815	1.35305	1.25e-06	0.954795
Coordinated Regulator	php-3	M00554_2.00	DVC	196	115	91.2014	1.26095	0.00055395	5.98e-12
Piecemeal Regulator	ztf-11	M00650_2.00	DVC	196	127	125.916	1.00861	0.484875	4.06e-11
Coordinated Regulator	nhr-6	M01298_2.00	DVC	196	117	84.2174	1.38926	3.02e-06	1.62e-09
Coordinated Regulator	ceh-14	M00435_2.00	DVC	196	130	112.592	1.15461	0.00807931	2.09e-08
Coordinated Regulator	ztf-9	M00636_2.00	DVC	196	74	52.0677	1.42123	0.000517186	6.75e-08
Coordinated Regulator	ztf-3	M00640_2.00	DVC	196	92	65.4894	1.40481	8.47e-05	0.000160025
Coordinated Regulator	ceh-74	M01248_2.00	DVC	196	72	44.557	1.61591	1.03e-05	0.00095135
Coordinated Regulator	ztf-14	M00628_2.00	DVC	196	75	45.1715	1.66034	2.12e-06	0.00597688
Piecemeal Regulator	ceh-48	M01905_2.00	DVC	196	102	95.1615	1.07186	0.193137	0.0129763
Coordinated Regulator	ceh-58	M00676_2.00	DVC	196	87	64.4164	1.35059	0.00065091	0.0351416
Other	ceh-38	M03716_2.00	DVC	196	99	95.8346	1.03303	0.365773	0.0596129
Other	xbp-1	M00597_2.00	DVC	196	77	50.3607	1.52897	3.11e-05	0.417204
Coordinated Regulator	unc-86	M03312_2.00	FLP	161	133	110.995	1.19825	8.74e-05	4.88e-12
Coordinated Regulator	ztf-11	M00650_2.00	FLP	161	124	103.431	1.19886	0.000440697	1.32e-07
Coordinated Regulator	unc-86	M02244_2.00	FLP	161	87	46.3915	1.87535	5.61e-11	1.82e-07
Coordinated Regulator	ztf-3	M00640_2.00	FLP	161	92	53.7949	1.7102	1.47e-09	3.13e-07
Coordinated Regulator	ceh-18	M00681_2.00	FLP	161	105	74.3706	1.41185	1.58e-06	6.86e-07
Coordinated Regulator	unc-62	M02185_2.00	FLP	161	84	51.5194	1.63046	1.8e-07	1.92e-05
Coordinated Regulator	ztf-9	M00636_2.00	FLP	161	80	42.7699	1.87048	8.81e-10	5.57e-05
Coordinated Regulator	ceh-74	M01248_2.00	FLP	161	69	36.6004	1.88523	2.46e-08	0.000146526
Coordinated Regulator	ceh-58	M00676_2.00	FLP	161	83	52.9135	1.5686	1.33e-06	0.000274892
Coordinated Regulator	ceh-38	M03716_2.00	FLP	161	94	78.7213	1.19409	0.0115369	0.000320259
Coordinated Regulator	egl-43	M00611_2.00	FLP	161	75	36.9529	2.02961	1.12e-10	0.00296239
Coordinated Regulator	egl-44	M09438_2.00	FLP	161	91	58.6904	1.55051	3.34e-07	0.00725909
Coordinated Regulator	ceh-48	M01905_2.00	FLP	161	95	78.1684	1.21532	0.00593991	0.0145407
Coordinated Regulator	unc-86	M03312_2.00	HSN	698	575	481.208	1.19491	1.14e-15	3.21e-31
Coordinated Regulator	ztf-11	M00650_2.00	HSN	698	528	448.417	1.17748	1.07e-10	1.53e-30
Coordinated Regulator	ceh-18	M00681_2.00	HSN	698	461	322.426	1.42978	1.2e-25	2.15e-25
Coordinated Regulator	egl-5	M09581_2.00	HSN	698	478	349.834	1.36636	1.97e-22	4.35e-22
Coordinated Regulator	ztf-3	M00640_2.00	HSN	698	412	233.222	1.76655	5.54e-43	1.63e-21
Coordinated Regulator	unc-86	M02244_2.00	HSN	698	306	201.126	1.52144	4.91e-17	8.73e-19
Coordinated Regulator	ceh-48	M01905_2.00	HSN	698	470	338.892	1.38687	2.91e-23	1.22e-18
Coordinated Regulator	cey-1	M01903_2.00	HSN	698	287	148.986	1.92636	1.02e-31	3.67e-16
Coordinated Regulator	ztf-9	M00636_2.00	HSN	698	300	185.425	1.61791	1.42e-20	2.87e-15
Coordinated Regulator	ceh-38	M03716_2.00	HSN	698	477	341.288	1.39764	7.57e-25	6.49e-15
Coordinated Regulator	egl-44	M09438_2.00	HSN	698	371	254.447	1.45807	4.71e-19	5.33e-12
Coordinated Regulator	ceh-74	M01248_2.00	HSN	698	293	158.677	1.84651	2.59e-29	2.44e-11
Coordinated Regulator	unc-62	M02185_2.00	HSN	698	335	223.357	1.49984	2.56e-18	9.77e-11
Coordinated Regulator	egl-43	M00611_2.00	HSN	698	295	160.206	1.84138	2.36e-29	1.88e-09
Coordinated Regulator	ceh-58	M00676_2.00	HSN	698	330	229.401	1.43853	4.07e-15	4.94e-08
Coordinated Regulator	ham-2	M00612_2.00	HSN	698	239	146.172	1.63506	5.72e-16	0.00155972
Coordinated Regulator	lin-15B	M09654_2.0	HSN	698	344	234.126	1.4693	1.56e-17	0.020771
Coordinated Regulator	hlh-30	M00937_2.00	HSN	698	246	161.665	1.52167	6.22e-13	0.0254293
Coordinated Regulator	crh-1	M03659_2.00	HSN	698	272	177.922	1.52876	7.19e-15	0.0421177
Coordinated Regulator	unc-86	M03312_2.00	I1	277	244	190.967	1.27771	2.16e-13	4.6e-25
Coordinated Regulator	pha-4	M08123_2.00	I1	277	220	135.15	1.62782	8.62e-25	1.64e-23
Coordinated Regulator	ztf-11	M00650_2.00	I1	277	241	177.953	1.35429	6.05e-17	6.06e-23
Coordinated Regulator	pag-3	M00619_2.00	I1	277	209	136.611	1.52989	2.87e-18	2.13e-15
Coordinated Regulator	ztf-3	M00640_2.00	I1	277	186	92.5539	2.00964	2.85e-29	9.77e-15
Coordinated Regulator	unc-86	M02244_2.00	I1	277	147	79.8164	1.84173	1.13e-16	2.01e-12
Coordinated Regulator	tbx-2	M00830_2.00	I1	277	170	92.1403	1.84501	7.14e-21	2.7e-12
Coordinated Regulator	ceh-45	M02120_2.00	I1	277	124	57.6222	2.15195	1.62e-18	6.94e-09
Coordinated Regulator	ceh-58	M00676_2.00	I1	277	165	91.0375	1.81244	4.61e-19	1.08e-07
Coordinated Regulator	ceh-48	M01905_2.00	I1	277	181	134.489	1.34584	2.58e-08	5.31e-07
Coordinated Regulator	ztf-9	M00636_2.00	I1	277	155	73.5854	2.10639	5e-24	3.9e-06
Coordinated Regulator	ceh-74	M01248_2.00	I1	277	133	62.9708	2.11209	1.54e-19	2.06e-05
Coordinated Regulator	ceh-38	M03716_2.00	I1	277	183	135.44	1.35115	1.25e-08	0.000431039
Coordinated Regulator	ceh-34	M00672_2.00	I1	277	108	56.5469	1.90992	3.28e-12	0.0344372
Coordinated Regulator	ztf-11	M00650_2.00	I2	101	81	64.8855	1.24835	0.000491558	0.000201655
Coordinated Regulator	ceh-14	M00435_2.00	I2	101	67	58.0195	1.15478	0.0475932	0.000357986
Coordinated Regulator	ztf-9	M00636_2.00	I2	101	44	26.8308	1.63991	0.000234342	0.0252932
Coordinated Regulator	ceh-54	M02188_2.00	I2	101	64	38.9695	1.64231	7.81e-07	0.0382486
Other	ztf-3	M00640_2.00	I2	101	56	33.7471	1.6594	7.41e-06	0.0622546
Other	ceh-34	M00672_2.00	I2	101	38	20.6182	1.84303	7.62e-05	0.0870517
Other	ceh-74	M01248_2.00	I2	101	46	22.9605	2.00344	6.8e-07	0.163497
Other	ceh-58	M00676_2.00	I2	101	51	33.1942	1.53641	0.000256786	0.295046
Other	ceh-48	M01905_2.00	I2	101	56	49.0373	1.14199	0.107102	0.329094
Other	ceh-38	M03716_2.00	I2	101	57	49.3841	1.15422	0.0850453	0.673622
Other	nsy-7	M00966_2.00	I2	101	42	27.1072	1.5494	0.00121995	0.692224
Other	ceh-32	M00483_2.00	I2	101	23	16.1246	1.42639	0.0513735	0.711306
Coordinated Regulator	fkh-9	M00663_2.00	I3	225	204	173.828	1.17357	2.29e-07	4.99e-23
Coordinated Regulator	ztf-11	M00650_2.00	I3	225	192	144.547	1.32829	4.43e-12	4.35e-17
Coordinated Regulator	ztf-3	M00640_2.00	I3	225	149	75.1792	1.98193	8.91e-23	1.21e-10
Coordinated Regulator	fax-1	M06432_2.00	I3	225	179	140.605	1.27307	5.19e-08	7.01e-10
Coordinated Regulator	tbx-2	M00830_2.00	I3	225	132	74.8432	1.76369	2.16e-14	1.78e-08
Coordinated Regulator	ceh-74	M01248_2.00	I3	225	105	51.1496	2.0528	1.04e-14	1.15e-05
Coordinated Regulator	ceh-48	M01905_2.00	I3	225	142	109.242	1.29987	1.19e-05	2.09e-05
Coordinated Regulator	ztf-9	M00636_2.00	I3	225	118	59.7716	1.97418	7.66e-16	2.45e-05
Coordinated Regulator	ceh-58	M00676_2.00	I3	225	129	73.9474	1.74448	1.59e-13	2.82e-05
Coordinated Regulator	ceh-7	M02154_2.00	I3	225	108	54.2289	1.99156	2.44e-14	8.33e-05
Coordinated Regulator	ceh-2	M03814_2.00	I3	225	97	53.1651	1.8245	2.48e-10	0.000710303
Coordinated Regulator	ceh-38	M03716_2.00	I3	225	154	110.014	1.39982	5.37e-09	0.00600587
Coordinated Regulator	ceh-34	M00672_2.00	I3	225	92	45.9316	2.00298	6.69e-12	0.00634139
Coordinated Regulator	ztf-3	M00640_2.00	I4	698	300	233.222	1.28633	1.18e-07	7.24e-17
Piecemeal Regulator	ztf-11	M00650_2.00	I4	698	384	448.417	0.856347	1	7.98e-16
Coordinated Regulator	ceh-48	M01905_2.00	I4	698	409	338.892	1.20688	8.8e-08	2.37e-11
Piecemeal Regulator	tbx-2	M00830_2.00	I4	698	241	232.18	1.03799	0.260758	1.38e-10
Piecemeal Regulator	lsy-2	M00615_2.00	I4	698	338	344.102	0.982267	0.712855	2.47e-08
Coordinated Regulator	ceh-38	M03716_2.00	I4	698	414	341.288	1.21305	2.99e-08	3.82e-08
Coordinated Regulator	cey-1	M01903_2.00	I4	698	201	148.986	1.34912	2.62e-06	1.14e-07
Piecemeal Regulator	unc-62	M02185_2.00	I4	698	244	223.357	1.09242	0.0545178	1.67e-06
Coordinated Regulator	ztf-9	M00636_2.00	I4	698	216	185.425	1.16489	0.00593805	1.97e-06
Coordinated Regulator	pha-2	M02184_2.00	I4	698	223	199.146	1.11978	0.0278447	0.0001977
Piecemeal Regulator	ceh-58	M00676_2.00	I4	698	241	229.401	1.05056	0.193064	0.000267003
Coordinated Regulator	ceh-74	M01248_2.00	I4	698	203	158.677	1.27933	6.73e-05	0.00135045
Coordinated Regulator	lim-7	M01242_2.00	I4	698	293	258.997	1.13129	0.00495392	0.00532321
Other	lin-15B	M09654_2.0	I4	698	309	234.126	1.3198	3.79e-09	0.061111
Other	ceh-34	M00672_2.00	I4	698	165	142.49	1.15798	0.0221208	0.225431
Other	hlh-11	M00931_2.00	I4	698	225	220.926	1.01844	0.396882	0.950995
Coordinated Regulator	ztf-11	M00650_2.00	I5	236	170	151.614	1.12127	0.00801775	4.22e-12
Coordinated Regulator	ztf-3	M00640_2.00	I5	236	132	78.8546	1.67397	3.38e-12	2.85e-08
Coordinated Regulator	ceh-18	M00681_2.00	I5	236	146	109.015	1.33926	1.58e-06	1.29e-06
Coordinated Regulator	ceh-53	M00679_2.00	I5	236	83	54.86	1.51294	3.35e-05	1.91e-06
Coordinated Regulator	nhr-84	M02414_2.00	I5	236	109	87.9451	1.23941	0.00372665	4.95e-05
Coordinated Regulator	ceh-38	M03716_2.00	I5	236	146	115.393	1.26525	5.91e-05	0.000164809
Coordinated Regulator	cey-1	M01903_2.00	I5	236	86	50.3734	1.70725	1.47e-07	0.000484335
Coordinated Regulator	tbx-2	M00830_2.00	I5	236	119	78.5022	1.51588	7.63e-08	0.00119865
Coordinated Regulator	ceh-48	M01905_2.00	I5	236	149	114.582	1.30038	7.17e-06	0.00156753
Coordinated Regulator	ceh-58	M00676_2.00	I5	236	114	77.5627	1.46978	1.09e-06	0.00165899
Coordinated Regulator	ceh-34	M00672_2.00	I5	236	78	48.1772	1.61902	6.02e-06	0.00245388
Coordinated Regulator	ztf-9	M00636_2.00	I5	236	94	62.6937	1.49935	9.73e-06	0.00797541
Coordinated Regulator	ceh-74	M01248_2.00	I5	236	81	53.6502	1.50978	4.74e-05	0.0227034
Other	irx-1	M02064_2.00	I5	236	70	45.8047	1.52823	0.000140913	0.176765
Piecemeal Regulator	ztf-11	M00650_2.00	I6	101	73	64.8855	1.12506	0.0603754	0.000173161
Coordinated Regulator	ceh-34	M00672_2.00	I6	101	31	20.6182	1.50353	0.0113568	0.026916
Other	ceh-74	M01248_2.00	I6	101	25	22.9605	1.08883	0.365327	0.121726
Other	tbx-2	M00830_2.00	I6	101	48	33.5963	1.42873	0.00257814	0.156807
Other	ztf-3	M00640_2.00	I6	101	53	33.7471	1.57051	8.99e-05	0.323025
Other	ceh-38	M03716_2.00	I6	101	53	49.3841	1.07322	0.280715	0.549806
Other	ztf-9	M00636_2.00	I6	101	45	26.8308	1.67718	0.000108209	0.626655
Other	irx-1	M02064_2.00	I6	101	29	19.6029	1.47938	0.0181012	0.942788
Other	ceh-58	M00676_2.00	I6	101	48	33.1942	1.44604	0.0019636	0.977183
Other	ceh-48	M01905_2.00	I6	101	54	49.0373	1.1012	0.19824	0.980761
Coordinated Regulator	ceh-43	M00423_2.00	IL1	40	25	14.5357	1.71991	0.000915148	0.0282214
Other	ztf-11	M00650_2.00	IL1	40	33	25.6972	1.28419	0.0115345	0.0537993
Other	ceh-32	M00483_2.00	IL1	40	11	6.38599	1.72252	0.0499254	0.180802
Other	ztf-3	M00640_2.00	IL1	40	17	13.3652	1.27196	0.157248	0.266463
Other	ztf-9	M00636_2.00	IL1	40	15	10.6261	1.41162	0.0934145	0.292216
Other	ceh-38	M03716_2.00	IL1	40	20	19.5581	1.0226	0.52431	0.317147
Other	egl-43	M00611_2.00	IL1	40	17	9.18085	1.85168	0.00578731	0.318447
Other	ref-2	M00621_2.00	IL1	40	11	8.40649	1.30851	0.216618	0.467177
Other	ceh-48	M01905_2.00	IL1	40	18	19.4207	0.926845	0.745911	0.530134
Other	ceh-58	M00676_2.00	IL1	40	20	13.1462	1.52135	0.0213005	0.554977
Other	ceh-18	M00681_2.00	IL1	40	28	18.4772	1.51538	0.00256194	0.626655
Other	ceh-74	M01248_2.00	IL1	40	14	9.09326	1.5396	0.0586174	0.905749
Piecemeal Regulator	ztf-11	M00650_2.00	IL2	735	483	472.186	1.0229	0.222115	2.81e-23
Coordinated Regulator	unc-86	M03312_2.00	IL2	735	549	506.716	1.08345	0.000393488	4.74e-21
Piecemeal Regulator	dmd-6	M00655_2.00	IL2	735	530	525.81	1.00797	0.396342	1.22e-20
Coordinated Regulator	daf-19	M00709_2.00	IL2	735	248	148.141	1.67408	9.55e-18	2.1e-16
Coordinated Regulator	ztf-3	M00640_2.00	IL2	735	336	245.585	1.36816	5.16e-12	1.64e-14
Coordinated Regulator	cfi-1	M01667_2.00	IL2	735	462	424.964	1.08715	0.00329375	4.65e-12
Coordinated Regulator	fkh-8	M03026_2.00	IL2	735	286	242.293	1.18039	0.000445742	3.17e-10
Coordinated Regulator	unc-86	M02244_2.00	IL2	735	259	211.787	1.22293	0.000105803	3.25e-09
Coordinated Regulator	ztf-9	M00636_2.00	IL2	735	243	195.254	1.24453	6.39e-05	6.2e-08
Coordinated Regulator	ceh-48	M01905_2.00	IL2	735	429	356.856	1.20217	7.91e-08	2.29e-07
Coordinated Regulator	tbx-2	M00830_2.00	IL2	735	293	244.488	1.19842	0.00011795	2.68e-07
Coordinated Regulator	ceh-74	M01248_2.00	IL2	735	241	167.089	1.44235	4.14e-10	1.27e-06
Coordinated Regulator	egl-27	M08205_2.00	IL2	735	373	325.764	1.145	0.00030309	3.9e-06
Coordinated Regulator	ceh-58	M00676_2.00	IL2	735	281	241.562	1.16326	0.00135655	2.49e-05
Coordinated Regulator	ceh-38	M03716_2.00	IL2	735	435	359.38	1.21042	1.92e-08	3.93e-05
Other	hlh-11	M00931_2.00	IL2	735	267	232.637	1.14771	0.00423891	0.5991
Coordinated Regulator	ztf-11	M00650_2.00	LUA	71	64	45.6126	1.40312	1.17e-06	3.97e-09
Coordinated Regulator	ztf-3	M00640_2.00	LUA	71	48	23.7232	2.02334	1.03e-08	0.000637826
Coordinated Regulator	ztf-9	M00636_2.00	LUA	71	42	18.8613	2.22679	1.81e-08	0.0014882
Coordinated Regulator	cfi-1	M01667_2.00	LUA	71	59	41.051	1.43724	8.56e-06	0.00343301
Coordinated Regulator	egl-43	M00611_2.00	LUA	71	38	16.296	2.33186	5.22e-08	0.0318403
Coordinated Regulator	tbx-2	M00830_2.00	LUA	71	50	23.6172	2.1171	5.14e-10	0.0373521
Other	ceh-58	M00676_2.00	LUA	71	46	23.3345	1.97133	8e-08	0.148366
Other	egl-5	M09581_2.00	LUA	71	57	35.5848	1.60181	3.01e-07	0.243011
Other	ceh-74	M01248_2.00	LUA	71	32	16.1405	1.98259	4.06e-05	0.314399
Other	nsy-7	M00966_2.00	LUA	71	41	19.0556	2.1516	8.86e-08	0.593437
Other	ceh-38	M03716_2.00	LUA	71	36	34.7156	1.037	0.442073	0.916489
Other	ceh-48	M01905_2.00	LUA	71	45	34.4718	1.30542	0.0101201	0.96511
Coordinated Regulator	ztf-11	M00650_2.00	M1	413	316	265.324	1.191	8.95e-08	6.3e-25
Coordinated Regulator	fax-1	M06432_2.00	M1	413	302	258.089	1.17014	4.66e-06	2.56e-22
Coordinated Regulator	ztf-3	M00640_2.00	M1	413	240	137.996	1.73919	5.16e-24	3.71e-20
Coordinated Regulator	ceh-74	M01248_2.00	M1	413	162	93.8879	1.72546	1.19e-13	1.42e-12
Coordinated Regulator	ceh-48	M01905_2.00	M1	413	271	200.519	1.35149	5.15e-12	1.43e-12
Coordinated Regulator	tbx-2	M00830_2.00	M1	413	227	137.379	1.65236	4.94e-19	2.04e-12
Coordinated Regulator	ceh-10	M00287_2.00	M1	413	228	158.097	1.44215	6e-12	6.39e-12
Coordinated Regulator	nhr-84	M02414_2.00	M1	413	231	153.904	1.50094	3.19e-14	8.93e-12
Coordinated Regulator	ceh-32	M00483_2.00	M1	413	112	65.9353	1.69863	1.07e-08	1.29e-11
Coordinated Regulator	ceh-58	M00676_2.00	M1	413	217	135.735	1.59871	4.82e-16	1.43e-11
Coordinated Regulator	egl-27	M08205_2.00	M1	413	243	183.049	1.32752	4.29e-09	1.32e-10
Coordinated Regulator	ceh-38	M03716_2.00	M1	413	268	201.937	1.32715	9.4e-11	1.88e-09
Coordinated Regulator	ztf-9	M00636_2.00	M1	413	190	109.714	1.73177	6.8e-17	6.42e-09
Coordinated Regulator	lim-7	M01242_2.00	M1	413	227	153.246	1.48128	3.53e-13	1.25e-08
Coordinated Regulator	ceh-34	M00672_2.00	M1	413	143	84.31	1.69612	3.1e-11	6.93e-05
Piecemeal Regulator	ztf-11	M00650_2.00	M2	500	279	321.215	0.868576	1	6.52e-18
Piecemeal Regulator	nhr-236	M06431_2.00	M2	500	288	301.334	0.955751	0.913202	7.48e-17
Coordinated Regulator	ztf-3	M00640_2.00	M2	500	222	167.065	1.32883	3.23e-07	2.39e-13
Coordinated Regulator	tbx-2	M00830_2.00	M2	500	190	166.318	1.14239	0.0160626	6.44e-13
Coordinated Regulator	ceh-48	M01905_2.00	M2	500	299	242.759	1.23167	4.36e-07	4.87e-09
Coordinated Regulator	ceh-38	M03716_2.00	M2	500	290	244.476	1.18621	3.55e-05	3.23e-08
Piecemeal Regulator	ceh-58	M00676_2.00	M2	500	182	164.328	1.10754	0.0553408	1.39e-06
Coordinated Regulator	ttx-1	M00396_2.00	M2	500	139	104.011	1.3364	0.000144783	1.22e-05
Coordinated Regulator	ceh-74	M01248_2.00	M2	500	144	113.666	1.26687	0.00110181	1.41e-05
Coordinated Regulator	ztf-9	M00636_2.00	M2	500	159	132.826	1.19706	0.00589875	0.000672189
Coordinated Regulator	ceh-34	M00672_2.00	M2	500	131	102.07	1.28343	0.00124556	0.00583479
Coordinated Regulator	lin-15B	M09654_2.0	M2	500	220	167.712	1.31177	1.09e-06	0.0184117
Other	irx-1	M02064_2.00	M2	500	129	97.0439	1.3293	0.000345505	0.117646
Coordinated Regulator	ztf-11	M00650_2.00	M3	128	107	82.2311	1.30121	1.89e-06	6.74e-13
Coordinated Regulator	ceh-54	M02188_2.00	M3	128	83	49.3871	1.6806	4.24e-09	5.82e-09
Coordinated Regulator	ztf-3	M00640_2.00	M3	128	87	42.7686	2.0342	7.6e-15	1.78e-06
Coordinated Regulator	tbx-2	M00830_2.00	M3	128	85	42.5775	1.99636	8.33e-14	9.04e-06
Coordinated Regulator	nhr-84	M02414_2.00	M3	128	77	47.699	1.61429	2.5e-07	1.21e-05
Coordinated Regulator	ceh-58	M00676_2.00	M3	128	79	42.0679	1.87792	6.77e-11	0.000535252
Coordinated Regulator	ceh-2	M03814_2.00	M3	128	57	30.245	1.88461	3.23e-07	0.000615512
Coordinated Regulator	ztf-9	M00636_2.00	M3	128	67	34.0034	1.97039	1.41e-09	0.000652308
Coordinated Regulator	ceh-74	M01248_2.00	M3	128	59	29.0984	2.0276	1.15e-08	0.00273758
Coordinated Regulator	mnm-2	M00616_2.00	M3	128	50	28.4041	1.76031	1.96e-05	0.00473778
Coordinated Regulator	ceh-48	M01905_2.00	M3	128	83	62.1463	1.33556	0.000207903	0.00637505
Coordinated Regulator	ceh-38	M03716_2.00	M3	128	82	62.5858	1.3102	0.000517192	0.00958621
Other	ceh-34	M00672_2.00	M3	128	49	26.13	1.87524	4.43e-06	0.24852
Coordinated Regulator	ztf-11	M00650_2.00	M4	52	42	33.4064	1.25724	0.00906652	0.000950907
Coordinated Regulator	pha-4	M08123_2.00	M4	52	36	25.3712	1.41893	0.00290121	0.00143629
Coordinated Regulator	ztf-3	M00640_2.00	M4	52	29	17.3747	1.66909	0.00100096	0.0106145
Coordinated Regulator	sptf-3	M00632_2.00	M4	52	24	14.5876	1.64523	0.00503423	0.0388469
Other	ceh-74	M01248_2.00	M4	52	21	11.8212	1.77646	0.00411924	0.0537993
Other	fax-1	M06432_2.00	M4	52	45	32.4955	1.38481	0.000173082	0.0669539
Other	ceh-58	M00676_2.00	M4	52	26	17.0901	1.52135	0.00931719	0.089966
Other	ceh-53	M00679_2.00	M4	52	20	12.0878	1.65456	0.0119258	0.104121
Other	irx-1	M02064_2.00	M4	52	16	10.0926	1.58533	0.0384128	0.109724
Other	ceh-38	M03716_2.00	M4	52	28	25.4255	1.10126	0.295872	0.613154
Other	ztf-9	M00636_2.00	M4	52	26	13.8139	1.88217	0.000364005	0.751898
Other	ceh-48	M01905_2.00	M4	52	34	25.2469	1.3467	0.0127466	0.961739
Other	nsy-7	M00966_2.00	M4	52	22	13.9562	1.57636	0.0134423	0.971878
Other	ceh-34	M00672_2.00	M4	52	12	10.6153	1.13044	0.384024	0.987123
Piecemeal Regulator	ztf-11	M00650_2.00	M5	307	210	197.226	1.06477	0.076278	2.97e-11
Piecemeal Regulator	fax-1	M06432_2.00	M5	307	197	191.848	1.02685	0.305389	2.16e-09
Coordinated Regulator	ceh-38	M03716_2.00	M5	307	175	150.108	1.16583	0.00315683	6.7e-09
Coordinated Regulator	ztf-3	M00640_2.00	M5	307	161	102.578	1.56954	1.46e-11	1.23e-08
Coordinated Regulator	ceh-48	M01905_2.00	M5	307	182	149.054	1.22103	0.000137613	2.32e-07
Coordinated Regulator	tbx-2	M00830_2.00	M5	307	147	102.119	1.43949	1.44e-07	3.51e-07
Coordinated Regulator	vab-15	M00555_2.00	M5	307	155	112.768	1.3745	9.96e-07	3.06e-06
Coordinated Regulator	ztf-9	M00636_2.00	M5	307	126	81.555	1.54497	4.96e-08	4.83e-05
Coordinated Regulator	ceh-58	M00676_2.00	M5	307	133	100.897	1.31817	0.000112403	0.000136806
Coordinated Regulator	nhr-84	M02414_2.00	M5	307	138	114.403	1.20626	0.00409857	0.00062971
Coordinated Regulator	irx-1	M02064_2.00	M5	307	86	59.585	1.44332	0.000221575	0.000856564
Coordinated Regulator	ceh-34	M00672_2.00	M5	307	88	62.6711	1.40415	0.000449355	0.00259561
Coordinated Regulator	lim-7	M01242_2.00	M5	307	140	113.914	1.229	0.00169024	0.00378169
Coordinated Regulator	xbp-1	M00597_2.00	M5	307	115	78.8813	1.45789	5.67e-06	0.00740467
Coordinated Regulator	ceh-74	M01248_2.00	M5	307	106	69.7908	1.51883	2.65e-06	0.0343468
Piecemeal Regulator	ztf-11	M00650_2.00	MC	448	296	287.809	1.02846	0.235197	1.51e-27
Piecemeal Regulator	nhr-236	M06431_2.00	MC	448	286	269.995	1.05928	0.0710854	2.61e-22
Piecemeal Regulator	dmd-6	M00655_2.00	MC	448	317	320.494	0.989099	0.68434	1.81e-21
Coordinated Regulator	cebp-1	M00604_2.00	MC	448	333	294.453	1.13091	7.04e-05	1.49e-18
Coordinated Regulator	ceh-48	M01905_2.00	MC	448	281	217.512	1.29188	2.17e-09	5.67e-16
Coordinated Regulator	ceh-18	M00681_2.00	MC	448	257	206.944	1.24188	1.99e-06	5.35e-15
Coordinated Regulator	ztf-3	M00640_2.00	MC	448	238	149.69	1.58995	2.85e-17	5.35e-15
Coordinated Regulator	ceh-19	M02180_2.00	MC	448	235	175.218	1.34119	1.29e-08	3.63e-13
Coordinated Regulator	ceh-38	M03716_2.00	MC	448	282	219.05	1.28737	2.9e-09	1.98e-12
Coordinated Regulator	daf-16	M01989_2.00	MC	448	220	170.804	1.28803	2.12e-06	1.21e-09
Coordinated Regulator	tbx-2	M00830_2.00	MC	448	190	149.021	1.27499	4.32e-05	2e-09
Coordinated Regulator	nhr-84	M02414_2.00	MC	448	204	166.947	1.22195	0.000254656	1.98e-08
Coordinated Regulator	ztf-9	M00636_2.00	MC	448	176	119.012	1.47884	5.62e-09	7.85e-07
Coordinated Regulator	ceh-74	M01248_2.00	MC	448	155	101.845	1.52193	1.3e-08	3.89e-06
Coordinated Regulator	ceh-58	M00676_2.00	MC	448	200	147.238	1.35835	2.18e-07	4.11e-06
Coordinated Regulator	lim-7	M01242_2.00	MC	448	210	166.233	1.26329	1.99e-05	8.06e-06
Coordinated Regulator	ceh-34	M00672_2.00	MC	448	125	91.455	1.36679	0.000117672	0.000245017
Coordinated Regulator	cebp-1	M00604_2.00	MI	614	431	403.558	1.068	0.0113925	5.17e-22
Coordinated Regulator	ceh-48	M01905_2.00	MI	614	352	298.108	1.18078	1.02e-05	1.18e-15
Piecemeal Regulator	ztf-11	M00650_2.00	MI	614	367	394.452	0.930404	0.997429	6.01e-13
Coordinated Regulator	ceh-38	M03716_2.00	MI	614	358	300.216	1.19247	2.38e-06	4.36e-10
Coordinated Regulator	ceh-18	M00681_2.00	MI	614	311	283.624	1.09652	0.0161821	5.03e-10
Coordinated Regulator	ztf-3	M00640_2.00	MI	614	263	205.156	1.28195	9.83e-07	4.24e-08
Piecemeal Regulator	fax-1	M06432_2.00	MI	614	369	383.697	0.961698	0.91377	7.57e-07
Coordinated Regulator	ceh-45	M02120_2.00	MI	614	149	127.726	1.16656	0.0224862	2.57e-06
Piecemeal Regulator	nhr-84	M02414_2.00	MI	614	247	228.806	1.07952	0.0741768	4.11e-06
Piecemeal Regulator	lim-7	M01242_2.00	MI	614	246	227.828	1.07976	0.0742221	2.06e-05
Piecemeal Regulator	ceh-58	M00676_2.00	MI	614	216	201.794	1.0704	0.125749	5.88e-05
Coordinated Regulator	ceh-74	M01248_2.00	MI	614	158	139.582	1.13195	0.0463576	6.73e-05
Piecemeal Regulator	ztf-9	M00636_2.00	MI	614	182	163.11	1.11581	0.0504852	8.52e-05
Coordinated Regulator	ceh-34	M00672_2.00	MI	614	148	125.342	1.18077	0.0157539	0.00615645
Other	ceh-33	M00563_2.00	MI	614	168	149.91	1.12068	0.0534917	0.0577467
Piecemeal Regulator	die-1	M00610_2.00	NSM	953	797	818.686	0.973511	0.99042	8.35e-34
Coordinated Regulator	pha-4	M08123_2.00	NSM	953	533	464.975	1.1463	6.43e-06	1.15e-32
Coordinated Regulator	ztf-3	M00640_2.00	NSM	953	452	318.426	1.41948	3.46e-19	1.78e-28
Piecemeal Regulator	ztf-11	M00650_2.00	NSM	953	574	612.236	0.937546	1	6.31e-26
Coordinated Regulator	ceh-48	M01905_2.00	NSM	953	570	462.699	1.2319	2.59e-12	1.86e-23
Piecemeal Regulator	dmd-6	M00655_2.00	NSM	953	648	681.764	0.950475	0.999096	4.12e-21
Coordinated Regulator	unc-86	M03312_2.00	NSM	953	686	657.008	1.04413	0.0230905	3.55e-20
Coordinated Regulator	ceh-38	M03716_2.00	NSM	953	577	465.971	1.23827	4.45e-13	4.8e-20
Coordinated Regulator	unc-86	M02244_2.00	NSM	953	333	274.603	1.21266	2.47e-05	3.62e-19
Coordinated Regulator	tbx-2	M00830_2.00	NSM	953	343	317.003	1.08201	0.0415928	8.76e-18
Coordinated Regulator	nhr-84	M02414_2.00	NSM	953	404	355.134	1.1376	0.000666741	2.15e-13
Coordinated Regulator	egl-43	M00611_2.00	NSM	953	291	218.734	1.33038	4.72e-08	2.39e-13
Coordinated Regulator	cey-1	M01903_2.00	NSM	953	280	203.415	1.3765	3.91e-09	1.3e-12
Coordinated Regulator	ttx-3	M02085_2.00	NSM	953	288	236.803	1.2162	0.000101422	8.26e-11
Coordinated Regulator	ceh-58	M00676_2.00	NSM	953	364	313.209	1.16217	0.000313112	2.16e-10
Coordinated Regulator	ztf-9	M00636_2.00	NSM	953	337	253.166	1.33114	1.65e-09	4.53e-10
Coordinated Regulator	ceh-2	M03814_2.00	NSM	953	264	225.184	1.17238	0.0020673	4.65e-10
Coordinated Regulator	ceh-74	M01248_2.00	NSM	953	299	216.647	1.38013	6.09e-10	4.77e-10
Piecemeal Regulator	nhr-239	M06434_2.00	NSM	953	388	363.908	1.0662	0.0597559	6.6e-08
Coordinated Regulator	ceh-34	M00672_2.00	NSM	953	245	194.546	1.25934	4.79e-05	0.00382892
Coordinated Regulator	lin-15B	M09654_2.0	NSM	953	433	319.659	1.35457	2.34e-14	0.0176416
Other	crh-1	M03659_2.00	NSM	953	286	242.922	1.17733	0.000945756	0.296789
Other	hlh-11	M00931_2.00	NSM	953	339	301.636	1.12387	0.00562894	0.344861
Coordinated Regulator	tbx-2	M00830_2.00	OLL	104	46	34.5942	1.3297	0.0150134	0.00484494
Coordinated Regulator	ceh-74	M01248_2.00	OLL	104	45	23.6425	1.90335	4.62e-06	0.040023
Coordinated Regulator	ztf-3	M00640_2.00	OLL	104	46	34.7495	1.32376	0.0162799	0.0446196
Other	ztf-11	M00650_2.00	OLL	104	74	66.8128	1.10757	0.0912177	0.073258
Other	nsy-7	M00966_2.00	OLL	104	39	27.9124	1.39723	0.0132623	0.0809718
Other	ceh-38	M03716_2.00	OLL	104	47	50.851	0.924269	0.822369	0.105402
Other	ceh-18	M00681_2.00	OLL	104	62	48.0406	1.29057	0.00498394	0.141811
Other	ceh-48	M01905_2.00	OLL	104	51	50.4939	1.01002	0.516623	0.245819
Other	lim-7	M01242_2.00	OLL	104	51	38.5898	1.32159	0.0101415	0.261143
Other	ztf-9	M00636_2.00	OLL	104	37	27.6277	1.33923	0.0306124	0.425897
Other	vab-3	M00342_2.00	OLL	104	53	39.2885	1.34899	0.00510697	0.476412
Other	ceh-32	M00483_2.00	OLL	104	25	16.6036	1.5057	0.0243706	0.594835
Other	ceh-58	M00676_2.00	OLL	104	45	34.1802	1.31655	0.0197178	0.73378
Piecemeal Regulator	ztf-11	M00650_2.00	OLQ	108	75	69.3825	1.08096	0.161887	0.00309008
Other	ceh-74	M01248_2.00	OLQ	108	33	24.5518	1.3441	0.0415915	0.0545897
Other	ztf-9	M00636_2.00	OLQ	108	45	28.6904	1.56847	0.000629654	0.0563699
Other	ceh-18	M00681_2.00	OLQ	108	66	49.8883	1.32295	0.00165163	0.274508
Other	nsy-7	M00966_2.00	OLQ	108	34	28.986	1.17298	0.173703	0.319687
Other	egl-43	M00611_2.00	OLQ	108	31	24.7883	1.25059	0.105698	0.335174
Other	ceh-58	M00676_2.00	OLQ	108	44	35.4948	1.23962	0.0574791	0.539071
Other	vab-3	M00342_2.00	OLQ	108	59	40.7996	1.44609	0.000374718	0.557555
Other	ztf-3	M00640_2.00	OLQ	108	48	36.086	1.33016	0.0130048	0.617683
Other	ceh-38	M03716_2.00	OLQ	108	52	52.8068	0.984722	0.618168	0.756419
Other	ceh-48	M01905_2.00	OLQ	108	50	52.436	0.953544	0.732347	0.982051
Coordinated Regulator	ztf-11	M00650_2.00	PDA	124	107	79.6614	1.34319	7.08e-08	8.69e-18
Coordinated Regulator	ceh-18	M00681_2.00	PDA	124	89	57.2792	1.55379	1.6e-08	5.12e-15
Coordinated Regulator	egl-5	M09581_2.00	PDA	124	96	62.1481	1.5447	1.04e-09	8.23e-15
Coordinated Regulator	ztf-9	M00636_2.00	PDA	124	68	32.9408	2.06431	7.99e-11	7.87e-09
Coordinated Regulator	unc-3	OH2011_UNC-3	PDA	124	71	25.2209	2.81513	1.61e-18	2.02e-08
Coordinated Regulator	ztf-3	M00640_2.00	PDA	124	83	41.4321	2.00328	1.12e-13	1.16e-07
Coordinated Regulator	ceh-58	M00676_2.00	PDA	124	72	40.7533	1.76673	1.69e-08	2.06e-07
Coordinated Regulator	ceh-48	M01905_2.00	PDA	124	86	60.2042	1.42847	3.78e-06	1.59e-06
Coordinated Regulator	ceh-38	M03716_2.00	PDA	124	89	60.63	1.46792	3.72e-07	2.96e-06
Coordinated Regulator	ceh-74	M01248_2.00	PDA	124	63	28.1891	2.23491	2.89e-11	0.000121888
Coordinated Regulator	ztf-3	M00640_2.00	PDB	535	313	178.759	1.75096	8.51e-32	5.53e-35
Coordinated Regulator	ztf-11	M00650_2.00	PDB	535	400	343.7	1.1638	1.82e-07	2.22e-33
Coordinated Regulator	egl-5	M09581_2.00	PDB	535	362	268.139	1.35005	4.95e-16	4.26e-30
Coordinated Regulator	unc-3	OH2011_UNC-3	PDB	535	238	108.816	2.18718	1.31e-35	2.82e-24
Coordinated Regulator	ceh-18	M00681_2.00	PDB	535	349	247.132	1.4122	1.98e-18	3.57e-21
Coordinated Regulator	syd-9	M00646_2.00	PDB	535	298	214.623	1.38848	5.79e-13	1.42e-20
Coordinated Regulator	elt-1	M08206_2.00	PDB	535	259	173.594	1.49199	3.3e-14	1.94e-20
Coordinated Regulator	ceh-48	M01905_2.00	PDB	535	352	259.752	1.35514	1.87e-15	3.69e-18
Coordinated Regulator	ceh-38	M03716_2.00	PDB	535	347	261.589	1.32651	1.77e-13	4.08e-16
Coordinated Regulator	ceh-58	M00676_2.00	PDB	535	258	175.831	1.46732	3.08e-13	5.71e-16
Coordinated Regulator	ztf-9	M00636_2.00	PDB	535	239	142.124	1.68164	5.22e-19	1.36e-14
Coordinated Regulator	F52B5.7	M00625_2.00	PDB	535	221	115.845	1.90773	5.24e-24	5.93e-14
Coordinated Regulator	unc-62	M02185_2.00	PDB	535	266	171.198	1.55376	4.27e-17	7.14e-13
Coordinated Regulator	ceh-74	M01248_2.00	PDB	535	228	121.622	1.87466	5.88e-24	9.35e-12
Coordinated Regulator	mbr-1	M00707_2.00	PDB	535	171	90.7375	1.88456	4.49e-17	4.23e-08
Other	nsy-7	M00966_2.00	PDB	535	234	143.588	1.62966	8.92e-17	0.0515837
Other	hlh-11	M00931_2.00	PDB	535	249	169.334	1.47047	1.03e-12	0.893286
Coordinated Regulator	cebp-1	M00604_2.00	PDE	313	239	205.723	1.16176	4.11e-05	1.01e-13
Piecemeal Regulator	die-1	M00610_2.00	PDE	313	274	268.887	1.01902	0.240534	5.12e-11
Coordinated Regulator	ztf-11	M00650_2.00	PDE	313	220	201.081	1.09409	0.0159423	1.11e-07
Piecemeal Regulator	ceh-48	M01905_2.00	PDE	313	157	151.967	1.03312	0.316528	1.22e-06
Coordinated Regulator	tbx-2	M00830_2.00	PDE	313	121	104.115	1.16217	0.0285909	0.000117521
Piecemeal Regulator	ceh-38	M03716_2.00	PDE	313	164	153.042	1.0716	0.126152	0.000177604
Coordinated Regulator	fkh-8	M03026_2.00	PDE	313	133	103.181	1.289	0.000343364	0.000813339
Coordinated Regulator	ztf-9	M00636_2.00	PDE	313	103	83.1489	1.23874	0.00868427	0.001315
Coordinated Regulator	lin-39	M08211_2.00	PDE	313	156	130.269	1.19752	0.00241064	0.0014565
Coordinated Regulator	unc-62	M02185_2.00	PDE	313	121	100.159	1.20808	0.0086625	0.00153772
Coordinated Regulator	nhr-84	M02414_2.00	PDE	313	142	116.639	1.21743	0.00240768	0.00155972
Coordinated Regulator	ceh-43	M00423_2.00	PDE	313	133	113.742	1.16932	0.0162799	0.00239442
Coordinated Regulator	daf-19	M00709_2.00	PDE	313	101	63.086	1.60099	5.25e-07	0.00762267
Coordinated Regulator	ztf-3	M00640_2.00	PDE	313	146	104.583	1.39603	1.35e-06	0.0491165
Other	ceh-58	M00676_2.00	PDE	313	111	102.869	1.07904	0.188977	0.0904445
Other	ceh-74	M01248_2.00	PDE	313	99	71.1548	1.39133	0.000240675	0.480893
Piecemeal Regulator	ceh-14	M00435_2.00	PHA	261	162	149.931	1.08049	0.0789347	0.00336029
Piecemeal Regulator	dmd-6	M00655_2.00	PHA	261	199	186.716	1.06579	0.0555859	0.00701664
Coordinated Regulator	ztf-3	M00640_2.00	PHA	261	102	87.2078	1.16962	0.0348748	0.0257893
Coordinated Regulator	ztf-11	M00650_2.00	PHA	261	194	167.674	1.157	0.000414058	0.0386459
Other	ceh-62	M02187_2.00	PHA	261	68	53.6184	1.26822	0.0212026	0.0802071
Other	unc-62	M02185_2.00	PHA	261	107	83.519	1.28115	0.00168189	0.0929156
Other	atf-5	M00593_2.00	PHA	261	108	79.5314	1.35796	0.00016348	0.122372
Other	ceh-23	M00671_2.00	PHA	261	130	110.016	1.18164	0.00879825	0.16911
Other	egl-43	M00611_2.00	PHA	261	80	59.905	1.33545	0.00305483	0.179328
Other	ztf-9	M00636_2.00	PHA	261	100	69.335	1.44227	3.23e-05	0.250825
Other	mdl-1	M08183_2.00	PHA	261	84	70.7898	1.18661	0.0440465	0.287028
Other	tbx-2	M00830_2.00	PHA	261	97	86.8182	1.11728	0.109669	0.526791
Other	ceh-19	M02180_2.00	PHA	261	117	102.08	1.14616	0.038023	0.549806
Other	ceh-48	M01905_2.00	PHA	261	115	126.72	0.907511	0.948571	0.583736
Other	ceh-74	M01248_2.00	PHA	261	77	59.3335	1.29775	0.00784816	0.835602
Other	ceh-58	M00676_2.00	PHA	261	121	85.779	1.4106	6.25e-06	0.855744
Other	nsy-7	M00966_2.00	PHA	261	79	70.0494	1.12778	0.127679	0.892631
Other	ceh-38	M03716_2.00	PHA	261	109	127.616	0.854122	0.997429	0.959943
Piecemeal Regulator	dmd-6	M00655_2.00	PHB	393	283	281.147	1.00659	0.458844	0.00484872
Piecemeal Regulator	ceh-74	M01248_2.00	PHB	393	103	89.3413	1.15288	0.0625745	0.0109393
Piecemeal Regulator	syd-9	M00646_2.00	PHB	393	159	157.658	1.00851	0.48087	0.0275362
Coordinated Regulator	ztf-11	M00650_2.00	PHB	393	280	252.475	1.10902	0.00230363	0.034771
Other	ceh-14	M00435_2.00	PHB	393	235	225.759	1.04093	0.195795	0.068587
Other	ztf-3	M00640_2.00	PHB	393	153	131.313	1.16516	0.0139524	0.0859849
Other	mdl-1	M08183_2.00	PHB	393	121	106.592	1.13517	0.0628154	0.105169
Other	ztf-9	M00636_2.00	PHB	393	124	104.401	1.18773	0.0175991	0.106828
Other	ceh-58	M00676_2.00	PHB	393	147	129.162	1.13811	0.035202	0.453257
Other	egl-43	M00611_2.00	PHB	393	108	90.2019	1.19731	0.0227782	0.471667
Other	atf-5	M00593_2.00	PHB	393	140	119.754	1.16906	0.0180668	0.501736
Other	ceh-48	M01905_2.00	PHB	393	180	190.809	0.943354	0.891814	0.676356
Other	nsy-7	M00966_2.00	PHB	393	110	105.477	1.04288	0.33363	0.752285
Other	ceh-23	M00671_2.00	PHB	393	172	165.657	1.03829	0.286325	0.793855
Other	egl-5	M09581_2.00	PHB	393	213	196.969	1.08139	0.0627139	0.950626
Other	ceh-38	M03716_2.00	PHB	393	184	192.158	0.957545	0.828988	0.99293
Piecemeal Regulator	mab-23	M00654_2.00	PHC	109	87	84.823	1.02567	0.370949	2.15e-08
Piecemeal Regulator	ztf-11	M00650_2.00	PHC	109	75	70.0249	1.07105	0.197198	1.2e-07
Coordinated Regulator	nob-1	M01245_2.00	PHC	109	79	69.5801	1.13538	0.0399988	3.09e-07
Coordinated Regulator	php-3	M00554_2.00	PHC	109	65	50.7191	1.28157	0.00498106	2.56e-06
Piecemeal Regulator	unc-86	M03312_2.00	PHC	109	82	75.1457	1.09121	0.0999053	3.81e-06
Coordinated Regulator	ztf-9	M00636_2.00	PHC	109	46	28.956	1.58862	0.000396775	0.000120205
Coordinated Regulator	unc-3	OH2011_UNC-3	PHC	109	45	22.17	2.02977	9.71e-07	0.000162017
Coordinated Regulator	ceh-58	M00676_2.00	PHC	109	53	35.8234	1.47948	0.000615755	0.000660809
Coordinated Regulator	ztf-3	M00640_2.00	PHC	109	58	36.4201	1.59253	2.56e-05	0.00220401
Coordinated Regulator	ceh-14	M00435_2.00	PHC	109	80	62.6151	1.27765	0.000542722	0.00263772
Coordinated Regulator	unc-86	M02244_2.00	PHC	109	53	31.4079	1.68747	1.58e-05	0.00400351
Coordinated Regulator	lim-7	M01242_2.00	PHC	109	59	40.4451	1.45877	0.000303174	0.00580177
Coordinated Regulator	syd-9	M00646_2.00	PHC	109	60	43.7269	1.37215	0.00147159	0.021469
Coordinated Regulator	ceh-23	M00671_2.00	PHC	109	65	45.9456	1.41472	0.000247274	0.0437977
Other	vab-7	M02186_2.00	PHC	109	69	51.7172	1.33418	0.00081918	0.0560491
Other	ceh-74	M01248_2.00	PHC	109	43	24.7791	1.73533	9.85e-05	0.059581
Other	ceh-48	M01905_2.00	PHC	109	57	52.9215	1.07707	0.259123	0.225528
Other	ceh-38	M03716_2.00	PHC	109	57	53.2958	1.0695	0.282682	0.311961
Coordinated Regulator	ztf-11	M00650_2.00	PLM	341	266	219.069	1.21423	4.9e-08	5.78e-25
Coordinated Regulator	hsf-1	M00682_2.00	PLM	341	265	201.08	1.31788	6.3e-13	3.12e-23
Coordinated Regulator	unc-86	M03312_2.00	PLM	341	290	235.089	1.23358	1.51e-11	2.84e-20
Coordinated Regulator	pag-3	M00619_2.00	PLM	341	227	168.175	1.34978	2.2e-10	2.09e-18
Coordinated Regulator	egl-5	M09581_2.00	PLM	341	232	170.907	1.35746	4.12e-11	2.43e-18
Coordinated Regulator	ceh-18	M00681_2.00	PLM	341	221	157.518	1.40302	9.5e-12	2.7e-18
Coordinated Regulator	unc-86	M02244_2.00	PLM	341	173	98.2577	1.76068	6.33e-17	4.6e-17
Coordinated Regulator	ztf-3	M00640_2.00	PLM	341	211	113.938	1.85188	5.85e-26	1.74e-14
Coordinated Regulator	gei-3	M00711_2.00	PLM	341	193	115.89	1.66538	4.74e-17	2.3e-14
Coordinated Regulator	atf-7	M00595_2.00	PLM	341	204	115.449	1.76702	6.85e-22	3.53e-12
Coordinated Regulator	ceh-38	M03716_2.00	PLM	341	205	166.733	1.22951	2.89e-05	6.74e-10
Coordinated Regulator	ceh-58	M00676_2.00	PLM	341	186	112.071	1.65966	5.91e-16	2.29e-09
Coordinated Regulator	ztf-9	M00636_2.00	PLM	341	163	90.5871	1.79937	1.75e-16	1.15e-08
Coordinated Regulator	ceh-74	M01248_2.00	PLM	341	163	77.5201	2.10268	1.99e-23	7.27e-07
Coordinated Regulator	ceh-48	M01905_2.00	PLM	341	210	165.562	1.26841	1.42e-06	9.25e-06
Coordinated Regulator	vab-3	M00342_2.00	PLM	341	196	128.821	1.52149	4.08e-13	0.000127016
Coordinated Regulator	hlh-30	M00937_2.00	PLM	341	138	78.9795	1.74729	2.34e-12	0.0113387
Coordinated Regulator	ztf-11	M00650_2.00	PLN	191	151	122.704	1.2306	1.01e-05	1.09e-16
Coordinated Regulator	nob-1	M01245_2.00	PLN	191	159	121.925	1.30408	6.32e-09	9.07e-14
Coordinated Regulator	php-3	M00554_2.00	PLN	191	136	88.8748	1.53024	1.39e-11	1.97e-11
Coordinated Regulator	ceh-18	M00681_2.00	PLN	191	141	88.2284	1.59812	3.3e-14	5.69e-11
Coordinated Regulator	unc-86	M03312_2.00	PLN	191	165	131.677	1.25306	3.79e-08	1.58e-10
Coordinated Regulator	tbx-2	M00830_2.00	PLN	191	109	63.5336	1.71563	3.91e-11	3.21e-10
Coordinated Regulator	ztf-3	M00640_2.00	PLN	191	125	63.8188	1.95867	1.09e-18	3.54e-08
Coordinated Regulator	unc-86	M02244_2.00	PLN	191	97	55.0358	1.76249	3.79e-10	1.85e-07
Coordinated Regulator	ztf-9	M00636_2.00	PLN	191	94	50.7394	1.8526	5.96e-11	5.58e-05
Coordinated Regulator	atf-5	M00593_2.00	PLN	191	113	58.2011	1.94154	1.16e-15	0.000106116
Coordinated Regulator	ceh-48	M01905_2.00	PLN	191	124	92.734	1.33716	6.06e-06	0.0001187
Coordinated Regulator	ceh-74	M01248_2.00	PLN	191	94	43.4203	2.16488	5.01e-15	0.000344974
Coordinated Regulator	ceh-58	M00676_2.00	PLN	191	101	62.7732	1.60897	2e-08	0.00122142
Coordinated Regulator	xbp-1	M00597_2.00	PLN	191	104	49.076	2.11916	1.57e-16	0.00202476
Coordinated Regulator	ceh-38	M03716_2.00	PLN	191	121	93.3898	1.29564	5.84e-05	0.00607626
Coordinated Regulator	unc-86	M03312_2.00	PQR	246	203	169.595	1.19697	1.58e-06	8.37e-11
Coordinated Regulator	ztf-11	M00650_2.00	PQR	246	191	158.038	1.20857	6.14e-06	1.57e-07
Coordinated Regulator	unc-86	M02244_2.00	PQR	246	107	70.8838	1.50951	1.13e-06	0.000164687
Coordinated Regulator	egl-13	M00710_2.00	PQR	246	186	143.482	1.29633	2.14e-08	0.000223756
Coordinated Regulator	mab-5	M01240_2.00	PQR	246	165	119.621	1.37936	8.58e-09	0.00119651
Coordinated Regulator	ztf-9	M00636_2.00	PQR	246	100	65.3503	1.53022	1.85e-06	0.00136469
Coordinated Regulator	ztf-3	M00640_2.00	PQR	246	130	82.1959	1.58159	6.88e-10	0.00424223
Coordinated Regulator	unc-62	M02185_2.00	PQR	246	117	78.719	1.4863	4.78e-07	0.00748789
Coordinated Regulator	ceh-58	M00676_2.00	PQR	246	106	80.8492	1.31108	0.000654021	0.0159943
Coordinated Regulator	ceh-74	M01248_2.00	PQR	246	102	55.9236	1.82392	1.2e-10	0.0186221
Other	ceh-9	M03847_2.00	PQR	246	132	93.1774	1.41665	6.37e-07	0.076543
Other	ceh-38	M03716_2.00	PQR	246	135	120.282	1.12236	0.0385588	0.257006
Other	lim-7	M01242_2.00	PQR	246	122	91.2798	1.33655	6.04e-05	0.278045
Other	ceh-48	M01905_2.00	PQR	246	143	119.437	1.19728	0.00197133	0.676356
Other	atf-5	M00593_2.00	PQR	246	111	74.9606	1.48078	1.55e-06	0.71512
Other	mnm-2	M00616_2.00	PQR	246	93	54.5891	1.70364	4.33e-08	0.804073
Other	nsy-7	M00966_2.00	PQR	246	92	66.0236	1.39344	0.000251888	0.837864
Coordinated Regulator	ztf-11	M00650_2.00	PVC	427	311	274.318	1.13372	0.000125552	2e-34
Coordinated Regulator	cfi-1	M01667_2.00	PVC	427	307	246.884	1.2435	2.31e-09	2.35e-30
Coordinated Regulator	egl-5	M09581_2.00	PVC	427	279	214.01	1.30368	3.31e-10	7.79e-30
Coordinated Regulator	unc-3	OH2011_UNC-3	PVC	427	178	86.8493	2.04953	5.02e-23	4.55e-26
Coordinated Regulator	ceh-14	M00435_2.00	PVC	427	317	245.29	1.29235	1.02e-12	2.15e-25
Coordinated Regulator	gei-3	M00711_2.00	PVC	427	234	145.117	1.61249	3.87e-18	2.33e-24
Coordinated Regulator	pag-3	M00619_2.00	PVC	427	278	210.589	1.32011	7.73e-11	1.65e-23
Coordinated Regulator	lin-31	M00665_2.00	PVC	427	312	253.386	1.23132	4.27e-09	6.43e-20
Coordinated Regulator	vab-15	M00555_2.00	PVC	427	237	156.847	1.51103	7.73e-15	4.2e-19
Coordinated Regulator	ceh-18	M00681_2.00	PVC	427	280	197.244	1.41956	1.93e-15	7.62e-19
Coordinated Regulator	ztf-3	M00640_2.00	PVC	427	249	142.673	1.74525	3.63e-25	1.08e-16
Coordinated Regulator	daf-16	M01989_2.00	PVC	427	252	162.797	1.54794	7.81e-18	7.26e-14
Coordinated Regulator	ceh-48	M01905_2.00	PVC	427	277	207.316	1.33612	1.91e-11	5.83e-13
Coordinated Regulator	ceh-58	M00676_2.00	PVC	427	219	140.336	1.56054	9.31e-15	1.65e-11
Coordinated Regulator	lim-7	M01242_2.00	PVC	427	249	158.441	1.57156	2.07e-18	3.14e-11
Coordinated Regulator	ztf-9	M00636_2.00	PVC	427	205	113.433	1.80723	1.1e-20	3.7e-11
Coordinated Regulator	ceh-74	M01248_2.00	PVC	427	186	97.0706	1.91613	5.68e-21	3.73e-11
Coordinated Regulator	ceh-38	M03716_2.00	PVC	427	275	208.782	1.31716	1.69e-10	2.54e-09
Other	nsy-7	M00966_2.00	PVC	427	195	114.602	1.70154	2.07e-16	0.26873
Coordinated Regulator	unc-86	M03312_2.00	PVD	191	157	131.677	1.19231	3.53e-05	2.43e-17
Coordinated Regulator	ztf-11	M00650_2.00	PVD	191	150	122.704	1.22245	2.05e-05	9.09e-13
Coordinated Regulator	lin-39	M08211_2.00	PVD	191	129	79.493	1.62278	1.53e-12	5.98e-12
Coordinated Regulator	ceh-18	M00681_2.00	PVD	191	126	88.2284	1.42811	5.87e-08	4.17e-11
Coordinated Regulator	ztf-3	M00640_2.00	PVD	191	117	63.8188	1.83332	1.46e-14	8.62e-11
Coordinated Regulator	unc-86	M02244_2.00	PVD	191	102	55.0358	1.85334	3.21e-12	2.41e-08
Coordinated Regulator	unc-62	M02185_2.00	PVD	191	100	61.1192	1.63615	1.04e-08	3.66e-08
Coordinated Regulator	ceh-58	M00676_2.00	PVD	191	102	62.7732	1.6249	8.98e-09	2.22e-07
Coordinated Regulator	ceh-74	M01248_2.00	PVD	191	93	43.4203	2.14185	1.54e-14	7.46e-07
Coordinated Regulator	ceh-38	M03716_2.00	PVD	191	111	93.3898	1.18857	0.00780412	2.25e-06
Coordinated Regulator	ztf-9	M00636_2.00	PVD	191	95	50.7394	1.87231	2.3e-11	2.03e-05
Coordinated Regulator	egl-43	M00611_2.00	PVD	191	86	43.8386	1.96174	4.34e-11	6.13e-05
Coordinated Regulator	ceh-48	M01905_2.00	PVD	191	111	92.734	1.19697	0.0059728	0.00125804
Coordinated Regulator	hsf-1	M00682_2.00	PVM	277	205	163.341	1.25504	2.18e-07	5.06e-20
Coordinated Regulator	ztf-11	M00650_2.00	PVM	277	208	177.953	1.16885	9.9e-05	2.55e-19
Coordinated Regulator	mab-23	M00654_2.00	PVM	277	229	215.559	1.06235	0.0313151	5.18e-19
Coordinated Regulator	unc-86	M03312_2.00	PVM	277	227	190.967	1.18869	1.12e-06	1.3e-16
Coordinated Regulator	nhr-6	M01298_2.00	PVM	277	171	119.021	1.43672	6.17e-10	2.08e-15
Coordinated Regulator	pag-3	M00619_2.00	PVM	277	173	136.611	1.26637	1.1e-05	1.51e-13
Coordinated Regulator	unc-86	M02244_2.00	PVM	277	151	79.8164	1.89184	1.82e-18	9.23e-13
Coordinated Regulator	ceh-18	M00681_2.00	PVM	277	176	127.954	1.37549	1e-08	2.16e-12
Coordinated Regulator	ztf-3	M00640_2.00	PVM	277	162	92.5539	1.75033	5.66e-17	4.92e-09
Coordinated Regulator	mab-5	M01240_2.00	PVM	277	186	134.695	1.38089	8.71e-10	5.31e-09
Coordinated Regulator	ceh-74	M01248_2.00	PVM	277	110	62.9708	1.74684	4.45e-10	1.85e-06
Coordinated Regulator	unc-62	M02185_2.00	PVM	277	134	88.6389	1.51175	2.12e-08	2.76e-06
Coordinated Regulator	ceh-58	M00676_2.00	PVM	277	139	91.0375	1.52684	4.22e-09	2.98e-06
Coordinated Regulator	ztf-9	M00636_2.00	PVM	277	120	73.5854	1.63076	2.9e-09	5.35e-05
Coordinated Regulator	ceh-38	M03716_2.00	PVM	277	156	135.44	1.1518	0.00919783	7.54e-05
Coordinated Regulator	vab-3	M00342_2.00	PVM	277	155	104.644	1.48122	1.49e-09	0.000959661
Other	ceh-48	M01905_2.00	PVM	277	160	134.489	1.18969	0.00160006	0.0771307
Coordinated Regulator	fkh-9	M00663_2.00	PVN	122	103	94.2534	1.0928	0.0375258	6.26e-13
Coordinated Regulator	ztf-11	M00650_2.00	PVN	122	95	78.3765	1.2121	0.00106807	5.07e-11
Coordinated Regulator	daf-12	M00685_2.00	PVN	122	83	54.9832	1.50955	5e-07	3.96e-09
Coordinated Regulator	nob-1	M01245_2.00	PVN	122	96	77.8787	1.23269	0.00038839	9.33e-09
Coordinated Regulator	ceh-14	M00435_2.00	PVN	122	89	70.0829	1.26992	0.00038075	1.33e-08
Coordinated Regulator	php-3	M00554_2.00	PVN	122	85	56.7682	1.49732	3.89e-07	1.11e-07
Coordinated Regulator	unc-3	OH2011_UNC-3	PVN	122	48	24.8141	1.93439	2.09e-06	7.06e-07
Coordinated Regulator	lim-7	M01242_2.00	PVN	122	70	45.2688	1.54632	7.15e-06	2.16e-05
Coordinated Regulator	ztf-3	M00640_2.00	PVN	122	70	40.7638	1.71721	1.01e-07	7.55e-05
Coordinated Regulator	ceh-58	M00676_2.00	PVN	122	64	40.0959	1.59617	1.01e-05	0.000405549
Coordinated Regulator	ztf-9	M00636_2.00	PVN	122	59	32.4095	1.82046	4.22e-07	0.0200255
Other	ceh-74	M01248_2.00	PVN	122	55	27.7344	1.98309	8.63e-08	0.0602071
Other	ceh-9	M03847_2.00	PVN	122	65	46.2099	1.40662	0.000517238	0.102612
Other	ceh-48	M01905_2.00	PVN	122	68	59.2332	1.148	0.0733288	0.299068
Other	ceh-38	M03716_2.00	PVN	122	68	59.6521	1.13994	0.0842144	0.313655
Coordinated Regulator	ztf-11	M00650_2.00	PVP	180	139	115.638	1.20203	0.000167291	1.6e-10
Coordinated Regulator	ztf-3	M00640_2.00	PVP	180	105	60.1433	1.74583	2.07e-11	3.9e-08
Coordinated Regulator	ceh-18	M00681_2.00	PVP	180	112	83.1472	1.34701	1.72e-05	1.65e-07
Coordinated Regulator	lin-31	M00665_2.00	PVP	180	137	106.814	1.2826	2.78e-06	4.89e-07
Coordinated Regulator	nhr-67	M02408_2.00	PVP	180	83	54.3117	1.52821	7.85e-06	1.72e-05
Coordinated Regulator	ztf-9	M00636_2.00	PVP	180	81	47.8173	1.69395	1.55e-07	0.00014642
Coordinated Regulator	atf-5	M00593_2.00	PVP	180	96	54.8492	1.75025	4.01e-10	0.00123398
Coordinated Regulator	ceh-38	M03716_2.00	PVP	180	100	88.0113	1.13622	0.0478167	0.00183012
Coordinated Regulator	ceh-48	M01905_2.00	PVP	180	116	87.3933	1.32733	1.94e-05	0.00457912
Coordinated Regulator	ceh-58	M00676_2.00	PVP	180	95	59.158	1.60587	5.86e-08	0.0120141
Coordinated Regulator	ceh-74	M01248_2.00	PVP	180	83	40.9197	2.02836	1.35e-11	0.0189496
Coordinated Regulator	unc-30	M01241_2.00	PVP	180	88	45.7928	1.9217	3.6e-11	0.022988
Coordinated Regulator	xbp-1	M00597_2.00	PVP	180	80	46.2496	1.72974	7.92e-08	0.0259712
Other	mbr-1	M00707_2.00	PVP	180	58	30.5285	1.89986	7.56e-07	0.0572017
Other	nsy-7	M00966_2.00	PVP	180	82	48.3099	1.69737	1.09e-07	0.179238
Other	mdl-1	M08183_2.00	PVP	180	77	48.8205	1.5772	7.03e-06	0.28827
Coordinated Regulator	pag-3	M00619_2.00	PVQ	163	103	80.3887	1.28128	0.000337737	4.78e-08
Coordinated Regulator	ceh-14	M00435_2.00	PVQ	163	128	93.6354	1.367	2.68e-08	5.23e-08
Coordinated Regulator	ztf-11	M00650_2.00	PVQ	163	123	104.716	1.1746	0.00180153	5.52e-07
Coordinated Regulator	ceh-18	M00681_2.00	PVQ	163	102	75.2944	1.35468	2.89e-05	9.96e-07
Coordinated Regulator	vab-15	M00555_2.00	PVQ	163	89	59.8737	1.48646	4.31e-06	2.45e-05
Coordinated Regulator	ceh-43	M00423_2.00	PVQ	163	90	59.2329	1.51943	1.27e-06	4.68e-05
Coordinated Regulator	ztf-9	M00636_2.00	PVQ	163	65	43.3012	1.50111	0.000204858	0.000209093
Coordinated Regulator	ztf-3	M00640_2.00	PVQ	163	86	54.4631	1.57905	5.34e-07	0.000721336
Coordinated Regulator	ceh-58	M00676_2.00	PVQ	163	95	53.5708	1.77335	7.3e-11	0.0267214
Other	ceh-74	M01248_2.00	PVQ	163	62	37.055	1.67319	1.23e-05	0.0926058
Other	ceh-48	M01905_2.00	PVQ	163	95	79.1394	1.20041	0.00943556	0.265442
Other	irx-1	M02064_2.00	PVQ	163	49	31.6363	1.54885	0.000954313	0.568155
Other	ceh-38	M03716_2.00	PVQ	163	85	79.6992	1.06651	0.238046	0.588622
Coordinated Regulator	nob-1	M01245_2.00	PVR	264	222	168.524	1.31732	8.57e-13	5.31e-22
Coordinated Regulator	ztf-11	M00650_2.00	PVR	264	219	169.602	1.29126	4.25e-11	2.7e-15
Coordinated Regulator	unc-86	M03312_2.00	PVR	264	230	182.004	1.26371	1.36e-11	2.12e-13
Coordinated Regulator	ceh-14	M00435_2.00	PVR	264	201	151.655	1.32538	4.19e-10	1.41e-12
Coordinated Regulator	nhr-6	M01298_2.00	PVR	264	188	113.436	1.65733	1.05e-19	1.46e-12
Coordinated Regulator	lin-31	M00665_2.00	PVR	264	207	156.66	1.32133	1.08e-10	1.49e-12
Coordinated Regulator	mef-2	M02745_2.00	PVR	264	215	155.977	1.37841	2.63e-14	1.67e-11
Coordinated Regulator	php-3	M00554_2.00	PVR	264	198	122.843	1.61182	3.01e-20	7.55e-10
Coordinated Regulator	ceh-18	M00681_2.00	PVR	264	179	121.949	1.46782	3.53e-12	9e-10
Coordinated Regulator	ztf-3	M00640_2.00	PVR	264	171	88.2102	1.93855	2.44e-24	1.17e-09
Coordinated Regulator	unc-86	M02244_2.00	PVR	264	146	76.0705	1.91927	1.27e-18	6.33e-08
Coordinated Regulator	tbx-2	M00830_2.00	PVR	264	149	87.8161	1.69673	3.48e-14	9.28e-08
Coordinated Regulator	ceh-58	M00676_2.00	PVR	264	144	86.765	1.65966	1.11e-12	1.96e-07
Coordinated Regulator	ztf-9	M00636_2.00	PVR	264	135	70.132	1.92494	9.05e-17	5.86e-07
Coordinated Regulator	ceh-74	M01248_2.00	PVR	264	126	60.0155	2.09946	2.46e-18	4.25e-05
Coordinated Regulator	ceh-38	M03716_2.00	PVR	264	153	129.083	1.18528	0.0023618	0.00976152
Coordinated Regulator	xbp-1	M00597_2.00	PVR	264	143	67.8328	2.10813	5.85e-22	0.0266102
Coordinated Regulator	ceh-48	M01905_2.00	PVR	264	168	128.177	1.31069	9.8e-07	0.0405497
Coordinated Regulator	ztf-11	M00650_2.00	PVT	193	157	123.989	1.26624	2.79e-07	7.48e-17
Coordinated Regulator	ceh-14	M00435_2.00	PVT	193	154	110.869	1.38903	1.3e-10	8.38e-12
Coordinated Regulator	pal-1	M02183_2.00	PVT	193	136	98.4306	1.38168	6.07e-08	1.49e-11
Coordinated Regulator	daf-16	M01989_2.00	PVT	193	134	73.5828	1.82108	7.74e-18	3.16e-11
Coordinated Regulator	pha-4	M08123_2.00	PVT	193	151	94.166	1.60355	2.26e-16	8.08e-10
Coordinated Regulator	fkh-7	M00792_2.00	PVT	193	140	87.1257	1.60687	4.57e-14	1.31e-09
Coordinated Regulator	vab-15	M00555_2.00	PVT	193	113	70.8935	1.59394	1.54e-09	1.25e-08
Coordinated Regulator	lim-6	M00432_2.00	PVT	193	101	50.6176	1.99535	4.55e-14	5.18e-08
Coordinated Regulator	ceh-74	M01248_2.00	PVT	193	79	43.875	1.80057	2.69e-08	4.22e-07
Coordinated Regulator	ceh-58	M00676_2.00	PVT	193	108	63.4305	1.70265	1.03e-10	9.29e-06
Coordinated Regulator	ztf-9	M00636_2.00	PVT	193	99	51.2707	1.93093	8.79e-13	2.08e-05
Coordinated Regulator	ztf-3	M00640_2.00	PVT	193	114	64.487	1.7678	9.38e-13	0.00200671
Coordinated Regulator	hlh-30	M00937_2.00	PVT	193	92	44.701	2.05812	3.08e-13	0.00212738
Coordinated Regulator	ceh-48	M01905_2.00	PVT	193	130	93.705	1.38733	1.93e-07	0.00593478
Coordinated Regulator	ceh-38	M03716_2.00	PVT	193	120	94.3677	1.27162	0.000193131	0.00757966
Coordinated Regulator	atf-5	M00593_2.00	PVT	193	112	58.8105	1.90442	9.58e-15	0.00771545
Coordinated Regulator	irx-1	M02064_2.00	PVT	193	76	37.4589	2.02889	3.09e-10	0.0157958
Coordinated Regulator	nob-1	M01245_2.00	PVW	570	460	363.859	1.26422	3.48e-18	2.1e-39
Coordinated Regulator	ztf-11	M00650_2.00	PVW	570	463	366.185	1.26439	1.47e-18	2.02e-33
Coordinated Regulator	ztf-3	M00640_2.00	PVW	570	341	190.454	1.79046	3.39e-37	5.65e-31
Coordinated Regulator	unc-86	M03312_2.00	PVW	570	484	392.964	1.23167	3.79e-18	7.62e-31
Coordinated Regulator	ceh-14	M00435_2.00	PVW	570	436	327.437	1.33156	5.29e-21	8.81e-31
Coordinated Regulator	nhr-6	M01298_2.00	PVW	570	373	244.918	1.52296	1.44e-26	6.1e-29
Coordinated Regulator	mef-2	M02745_2.00	PVW	570	451	336.769	1.3392	1.12e-23	3.43e-28
Coordinated Regulator	pag-3	M00619_2.00	PVW	570	378	281.114	1.34465	5.37e-16	1.53e-27
Coordinated Regulator	atf-7	M00595_2.00	PVW	570	327	192.979	1.69449	7.13e-30	1.21e-26
Coordinated Regulator	gei-3	M00711_2.00	PVW	570	351	193.716	1.81193	2.95e-40	1.66e-23
Coordinated Regulator	php-3	M00554_2.00	PVW	570	402	265.228	1.51567	2.35e-30	1.11e-22
Coordinated Regulator	tbx-2	M00830_2.00	PVW	570	296	189.603	1.56116	1.15e-19	9.62e-20
Coordinated Regulator	vab-7	M02186_2.00	PVW	570	380	270.448	1.40508	6.05e-20	3.68e-18
Coordinated Regulator	unc-86	M02244_2.00	PVW	570	277	164.243	1.68652	7e-23	5.33e-16
Coordinated Regulator	cey-1	M01903_2.00	PVW	570	252	121.665	2.07127	1.26e-33	1.5e-14
Coordinated Regulator	ztf-9	M00636_2.00	PVW	570	272	151.421	1.79631	1.34e-26	6.01e-13
Coordinated Regulator	ceh-58	M00676_2.00	PVW	570	306	187.334	1.63345	5.02e-24	1.46e-12
Coordinated Regulator	ceh-74	M01248_2.00	PVW	570	243	129.579	1.8753	1.7e-25	2.04e-12
Coordinated Regulator	ceh-38	M03716_2.00	PVW	570	373	278.703	1.33834	3.23e-15	2.7e-11
Coordinated Regulator	ceh-48	M01905_2.00	PVW	570	369	276.745	1.33336	1.28e-14	6.7e-09
Coordinated Regulator	xbp-1	M00597_2.00	PVW	570	280	146.457	1.91182	1.82e-32	3.5e-05
Coordinated Regulator	hlh-30	M00937_2.00	PVW	570	220	132.019	1.66643	3.16e-16	5.42e-05
Other	tra-1	DZ2013_TRA-1	PVW	570	241	137.862	1.74812	5.57e-21	0.846227
Piecemeal Regulator	ztf-11	M00650_2.00	RIA	440	277	282.669	0.979943	0.751185	6.64e-14
Coordinated Regulator	ztf-3	M00640_2.00	RIA	440	214	147.017	1.45561	6.56e-11	2.55e-13
Piecemeal Regulator	syd-9	M00646_2.00	RIA	440	188	176.512	1.06508	0.150376	9e-12
Coordinated Regulator	ztf-9	M00636_2.00	RIA	440	159	116.887	1.36029	9.06e-06	1e-11
Coordinated Regulator	atf-7	M00595_2.00	RIA	440	179	148.966	1.20162	0.00191961	2.64e-11
Coordinated Regulator	ceh-58	M00676_2.00	RIA	440	195	144.608	1.34847	5.64e-07	1.72e-08
Coordinated Regulator	ceh-48	M01905_2.00	RIA	440	250	213.628	1.17026	0.00037759	1.87e-08
Coordinated Regulator	unc-62	M02185_2.00	RIA	440	179	140.798	1.27132	9.94e-05	3.78e-07
Coordinated Regulator	ceh-8	M00426_2.00	RIA	440	201	133.266	1.50827	1.84e-11	4.08e-06
Piecemeal Regulator	ceh-38	M03716_2.00	RIA	440	232	215.139	1.07837	0.0633076	9.62e-05
Coordinated Regulator	ceh-32	M00483_2.00	RIA	440	98	70.2458	1.3951	0.000402589	0.000845819
Coordinated Regulator	ceh-74	M01248_2.00	RIA	440	152	100.026	1.51961	1.99e-08	0.00172248
Coordinated Regulator	lim-7	M01242_2.00	RIA	440	206	163.265	1.26176	2.61e-05	0.0158041
Other	mdl-1	M08183_2.00	RIA	440	167	119.339	1.39937	7.46e-07	0.399213
Coordinated Regulator	ztf-11	M00650_2.00	RIB	153	110	98.2919	1.11912	0.0313151	3.11e-10
Coordinated Regulator	ttx-1	M00396_2.00	RIB	153	69	31.8274	2.16794	4.26e-11	3.9e-05
Coordinated Regulator	ceh-45	M02120_2.00	RIB	153	69	31.8274	2.16794	4.26e-11	8.08e-05
Coordinated Regulator	ztf-9	M00636_2.00	RIB	153	65	40.6447	1.59923	2.28e-05	0.000454154
Coordinated Regulator	ztf-3	M00640_2.00	RIB	153	86	51.1218	1.68226	1.36e-08	0.00215189
Coordinated Regulator	ceh-32	M00483_2.00	RIB	153	45	24.4264	1.84227	3.24e-05	0.011363
Coordinated Regulator	ceh-58	M00676_2.00	RIB	153	80	50.2843	1.59095	1.01e-06	0.0129964
Coordinated Regulator	ceh-38	M03716_2.00	RIB	153	92	74.8096	1.22979	0.00416349	0.0385494
Other	ceh-48	M01905_2.00	RIB	153	93	74.2843	1.25195	0.00196585	0.068018
Other	ceh-74	M01248_2.00	RIB	153	61	34.7817	1.75379	2.64e-06	0.137793
Other	nsy-7	M00966_2.00	RIB	153	68	41.0635	1.65597	3.59e-06	0.908933
Piecemeal Regulator	ztf-11	M00650_2.00	RIC	266	182	170.887	1.06503	0.0927105	9.76e-14
Coordinated Regulator	fax-1	M06432_2.00	RIC	266	191	166.227	1.14903	0.00109079	8.97e-13
Coordinated Regulator	ceh-18	M00681_2.00	RIC	266	161	122.873	1.31029	2.97e-06	7.68e-11
Coordinated Regulator	mef-2	M02745_2.00	RIC	266	193	157.159	1.22806	5.12e-06	1.8e-10
Coordinated Regulator	unc-62	M02185_2.00	RIC	266	130	85.1189	1.52727	1.63e-08	2.31e-10
Coordinated Regulator	ztf-3	M00640_2.00	RIC	266	133	88.8785	1.49643	3.43e-08	1.2e-09
Coordinated Regulator	ceh-74	M01248_2.00	RIC	266	116	60.4702	1.9183	1.29e-13	1.29e-06
Coordinated Regulator	syd-9	M00646_2.00	RIC	266	136	106.71	1.27449	0.000239359	1.75e-05
Coordinated Regulator	ceh-58	M00676_2.00	RIC	266	128	87.4223	1.46416	3.19e-07	3.32e-05
Coordinated Regulator	ztf-9	M00636_2.00	RIC	266	115	70.6633	1.62744	7.03e-09	4.18e-05
Coordinated Regulator	mdl-1	M08183_2.00	RIC	266	112	72.1459	1.55241	1.77e-07	0.00041263
Coordinated Regulator	mbr-1	M00707_2.00	RIC	266	87	45.1144	1.92843	6.82e-10	0.00328944
Coordinated Regulator	ceh-38	M03716_2.00	RIC	266	146	130.061	1.12255	0.0323833	0.00904836
Other	ceh-48	M01905_2.00	RIC	266	154	129.148	1.19243	0.00170319	0.0703361
Other	hlh-10	M00930_2.00	RIC	266	141	94.2265	1.49639	7.44e-09	0.0781595
Coordinated Regulator	ztf-11	M00650_2.00	RID	258	180	165.747	1.08599	0.0395115	2.94e-11
Coordinated Regulator	nhr-6	M01298_2.00	RID	258	151	110.858	1.36211	6.29e-07	1e-10
Coordinated Regulator	lim-4	M02182_2.00	RID	258	126	90.5709	1.39118	6.25e-06	5.39e-10
Coordinated Regulator	nhr-46	M00692_2.00	RID	258	146	108.123	1.35032	2.34e-06	2.9e-09
Coordinated Regulator	ztf-3	M00640_2.00	RID	258	129	86.2054	1.49643	5.5e-08	1.3e-07
Coordinated Regulator	tbx-2	M00830_2.00	RID	258	114	85.8202	1.32836	0.000223612	6.99e-07
Coordinated Regulator	ceh-10	M00287_2.00	RID	258	137	98.7626	1.38716	1.59e-06	1.62e-06
Coordinated Regulator	ztf-9	M00636_2.00	RID	258	94	68.5381	1.3715	0.000409323	2.74e-06
Coordinated Regulator	ceh-48	M01905_2.00	RID	258	163	125.264	1.30126	2.57e-06	1.93e-05
Coordinated Regulator	ceh-58	M00676_2.00	RID	258	124	84.7931	1.46238	5.23e-07	4.18e-05
Coordinated Regulator	ceh-74	M01248_2.00	RID	258	90	58.6515	1.53449	9.37e-06	0.000268978
Coordinated Regulator	ceh-38	M03716_2.00	RID	258	155	126.15	1.2287	0.000265117	0.000279842
Coordinated Regulator	xbp-1	M00597_2.00	RID	258	103	66.2911	1.55375	6.9e-07	0.00112398
Coordinated Regulator	ceh-32	M00483_2.00	RID	258	67	41.1896	1.62662	3.8e-05	0.0314698
Coordinated Regulator	unc-3	OH2011_UNC-3	RIF	154	68	31.3227	2.17095	6.52e-11	1.32e-08
Coordinated Regulator	ztf-11	M00650_2.00	RIF	154	112	98.9343	1.13206	0.0183685	3.55e-08
Coordinated Regulator	ceh-16	M06491_2.00	RIF	154	108	81.3531	1.32755	1.41e-05	4.03e-06
Coordinated Regulator	ceh-18	M00681_2.00	RIF	154	89	71.1371	1.25111	0.00311524	0.000500031
Coordinated Regulator	unc-62	M02185_2.00	RIF	154	70	49.2794	1.42047	0.000439107	0.00165596
Coordinated Regulator	ceh-58	M00676_2.00	RIF	154	82	50.6129	1.62014	2.85e-07	0.0034522
Coordinated Regulator	elt-1	M08206_2.00	RIF	154	71	49.9691	1.42088	0.00037998	0.00395723
Coordinated Regulator	ztf-9	M00636_2.00	RIF	154	75	40.9103	1.83328	8.62e-09	0.0192561
Coordinated Regulator	ztf-3	M00640_2.00	RIF	154	84	51.456	1.63246	1.15e-07	0.0235056
Other	vab-3	M00342_2.00	RIF	154	80	58.1773	1.37511	0.000326725	0.0505957
Other	ceh-74	M01248_2.00	RIF	154	62	35.0091	1.77097	1.53e-06	0.0943883
Other	xbp-1	M00597_2.00	RIF	154	73	39.5691	1.84487	1.25e-08	0.149525
Other	ceh-38	M03716_2.00	RIF	154	80	75.2986	1.06244	0.261447	0.391364
Other	ceh-48	M01905_2.00	RIF	154	86	74.7698	1.1502	0.0463143	0.633241
Coordinated Regulator	ztf-11	M00650_2.00	RIG	846	575	543.496	1.05796	0.0132623	5.13e-45
Coordinated Regulator	dmd-6	M00655_2.00	RIG	846	630	605.218	1.04095	0.0325337	5.13e-45
Coordinated Regulator	ztf-3	M00640_2.00	RIG	846	453	282.674	1.60255	4.28e-33	1.91e-38
Coordinated Regulator	egl-13	M00710_2.00	RIG	846	580	493.437	1.17543	7.51e-10	1.95e-38
Coordinated Regulator	pag-3	M00619_2.00	RIG	846	515	417.232	1.23433	1.4e-11	2.67e-35
Coordinated Regulator	atf-7	M00595_2.00	RIG	846	429	286.421	1.4978	9.45e-24	2.84e-35
Coordinated Regulator	mef-2	M02745_2.00	RIG	846	612	499.836	1.2244	1.15e-15	2.84e-32
Coordinated Regulator	ceh-16	M06491_2.00	RIG	846	568	446.914	1.27094	3.68e-17	3.43e-28
Coordinated Regulator	ceh-48	M01905_2.00	RIG	846	551	410.748	1.34145	3.89e-22	6.42e-27
Coordinated Regulator	daf-16	M01989_2.00	RIG	846	460	322.544	1.42616	1.38e-21	6.2e-25
Coordinated Regulator	syd-9	M00646_2.00	RIG	846	428	339.385	1.2611	6.2e-10	1.25e-23
Coordinated Regulator	ceh-38	M03716_2.00	RIG	846	558	413.653	1.34896	2.14e-23	2.68e-19
Coordinated Regulator	lim-6	M00432_2.00	RIG	846	350	221.878	1.57744	1.38e-21	2.68e-19
Coordinated Regulator	fos-1	M01144_2.00	RIG	846	333	219.226	1.51898	1.33e-17	3.73e-19
Coordinated Regulator	egl-27	M08205_2.00	RIG	846	454	374.961	1.21079	3.8e-08	1.27e-18
Coordinated Regulator	ceh-74	M01248_2.00	RIG	846	320	192.322	1.66387	6.15e-23	2.6e-18
Coordinated Regulator	cey-1	M01903_2.00	RIG	846	318	180.576	1.76103	5.91e-27	6.88e-18
Coordinated Regulator	ztf-9	M00636_2.00	RIG	846	375	224.741	1.66859	1.33e-28	1.3e-17
Coordinated Regulator	2020-06-01	M00599_2.00	RIG	846	386	259.981	1.48473	1.23e-19	6.82e-17
Coordinated Regulator	egl-43	M00611_2.00	RIG	846	324	194.175	1.6686	1.64e-23	1.19e-16
Coordinated Regulator	unc-62	M02185_2.00	RIG	846	395	270.717	1.45909	6.75e-19	1.21e-16
Coordinated Regulator	atf-5	M00593_2.00	RIG	846	387	257.791	1.50121	1.33e-20	2.52e-15
Coordinated Regulator	ceh-58	M00676_2.00	RIG	846	383	278.042	1.37749	6.16e-14	5.97e-13
Coordinated Regulator	ztf-14	M00628_2.00	RIG	846	313	194.975	1.60533	7.8e-20	7.85e-10
Coordinated Regulator	crh-2	M00603_2.00	RIG	846	363	254.886	1.42416	4.02e-15	1.88e-09
Coordinated Regulator	hlh-10	M00930_2.00	RIG	846	406	299.683	1.35477	6.33e-14	4.58e-06
Coordinated Regulator	ceh-62	M02187_2.00	RIG	846	274	173.798	1.57655	7.44e-16	0.000122292
Coordinated Regulator	nsy-7	M00966_2.00	RIG	846	335	227.057	1.4754	8.15e-16	0.00262752
Coordinated Regulator	crh-1	M03659_2.00	RIG	846	347	215.647	1.60911	7.45e-23	0.00449905
Piecemeal Regulator	dmd-6	M00655_2.00	RIH	297	222	212.47	1.04485	0.129914	6.1e-29
Coordinated Regulator	ztf-11	M00650_2.00	RIH	297	207	190.802	1.08489	0.0307022	1.08e-23
Coordinated Regulator	unc-86	M03312_2.00	RIH	297	232	204.755	1.13306	0.000358149	1.45e-18
Coordinated Regulator	ztf-3	M00640_2.00	RIH	297	167	99.2365	1.68285	2.53e-15	2.65e-13
Coordinated Regulator	ceh-18	M00681_2.00	RIH	297	194	137.193	1.41407	6.52e-11	8.73e-12
Coordinated Regulator	unc-86	M02244_2.00	RIH	297	132	85.5793	1.54243	1.5e-08	9e-10
Coordinated Regulator	nhr-67	M02408_2.00	RIH	297	140	89.6144	1.56225	1.38e-09	3.32e-09
Coordinated Regulator	ceh-74	M01248_2.00	RIH	297	126	67.5175	1.86618	1.23e-13	1.85e-08
Coordinated Regulator	ceh-48	M01905_2.00	RIH	297	194	144.199	1.34536	8.75e-09	5.04e-08
Coordinated Regulator	ceh-58	M00676_2.00	RIH	297	149	97.6106	1.52647	1.2e-09	5.04e-08
Coordinated Regulator	ztf-9	M00636_2.00	RIH	297	139	78.8985	1.76176	2.08e-13	3.49e-07
Coordinated Regulator	ceh-38	M03716_2.00	RIH	297	195	145.219	1.3428	8.71e-09	4.39e-07
Coordinated Regulator	mnm-2	M00616_2.00	RIH	297	116	65.9064	1.76007	1.07e-10	0.00063049
Other	irx-1	M02064_2.00	RIH	297	105	57.6441	1.82152	2.14e-10	0.108882
Other	nsy-7	M00966_2.00	RIH	297	131	79.7114	1.64343	2.79e-10	0.275696
Piecemeal Regulator	ztf-11	M00650_2.00	RIM	282	189	181.165	1.04325	0.19155	3.84e-14
Coordinated Regulator	ztf-3	M00640_2.00	RIM	282	135	94.2245	1.43275	6.08e-07	8.25e-09
Coordinated Regulator	ceh-74	M01248_2.00	RIM	282	97	64.1075	1.51308	8.26e-06	1.83e-05
Coordinated Regulator	ztf-9	M00636_2.00	RIM	282	111	74.9137	1.4817	3.03e-06	4.86e-05
Coordinated Regulator	ceh-58	M00676_2.00	RIM	282	120	92.6808	1.29477	0.000533485	0.000328536
Piecemeal Regulator	ceh-38	M03716_2.00	RIM	282	148	137.884	1.07336	0.134059	0.0065916
Piecemeal Regulator	ceh-48	M01905_2.00	RIM	282	147	136.916	1.07365	0.134787	0.0225531
Other	mdl-1	M08183_2.00	RIM	282	104	76.4855	1.35973	0.000284005	0.39436
Other	ceh-62	M02187_2.00	RIM	282	82	57.9325	1.41544	0.000526356	0.800655
Coordinated Regulator	nhr-236	M06431_2.00	RIP	134	107	80.7574	1.32496	1.85e-06	1.96e-12
Coordinated Regulator	unc-86	M03312_2.00	RIP	134	124	92.3809	1.34227	1.06e-10	2.46e-10
Coordinated Regulator	cfi-1	M01667_2.00	RIP	134	110	77.4765	1.41979	4.79e-09	2.14e-09
Coordinated Regulator	ztf-11	M00650_2.00	RIP	134	122	86.0857	1.41719	2.98e-12	4.67e-08
Coordinated Regulator	ztf-3	M00640_2.00	RIP	134	97	44.7734	2.16647	2.87e-19	3.71e-06
Coordinated Regulator	ceh-58	M00676_2.00	RIP	134	85	44.0398	1.93007	1.62e-12	6.68e-06
Coordinated Regulator	ceh-74	M01248_2.00	RIP	134	72	30.4624	2.36357	3.22e-14	2.74e-05
Coordinated Regulator	unc-86	M02244_2.00	RIP	134	69	38.6115	1.78703	6.15e-08	2.8e-05
Coordinated Regulator	ttx-1	M00396_2.00	RIP	134	57	27.875	2.04484	2.41e-08	0.000101308
Coordinated Regulator	ztf-9	M00636_2.00	RIP	134	72	35.5973	2.02263	7.64e-11	0.000760251
Other	ceh-38	M03716_2.00	RIP	134	82	65.5196	1.25153	0.00345958	0.120124
Other	mbr-1	M00707_2.00	RIP	134	48	22.7268	2.11205	2.32e-07	0.177468
Other	ceh-48	M01905_2.00	RIP	134	90	65.0594	1.38335	1.64e-05	0.180589
Coordinated Regulator	dmd-6	M00655_2.00	RIR	160	142	114.462	1.24059	2.56e-07	1.26e-14
Coordinated Regulator	ztf-11	M00650_2.00	RIR	160	129	102.789	1.255	7.44e-06	5.05e-12
Coordinated Regulator	unc-86	M03312_2.00	RIR	160	141	110.306	1.27827	2.4e-08	1.32e-11
Coordinated Regulator	ztf-3	M00640_2.00	RIR	160	107	53.4607	2.00147	3.58e-17	1.26e-06
Coordinated Regulator	nhr-67	M02408_2.00	RIR	160	75	48.2771	1.55353	1.04e-05	4.4e-06
Coordinated Regulator	ceh-74	M01248_2.00	RIR	160	64	36.373	1.75954	1.35e-06	8.66e-06
Coordinated Regulator	ztf-9	M00636_2.00	RIR	160	83	42.5042	1.95275	2.94e-11	1.15e-05
Coordinated Regulator	unc-86	M02244_2.00	RIR	160	80	46.1033	1.73523	2.93e-08	1.42e-05
Coordinated Regulator	ceh-58	M00676_2.00	RIR	160	94	52.5849	1.78759	5.1e-11	7.25e-05
Piecemeal Regulator	ceh-38	M03716_2.00	RIR	160	89	78.2323	1.13764	0.0571446	0.00244031
Coordinated Regulator	ceh-48	M01905_2.00	RIR	160	90	77.6829	1.15856	0.0344835	0.0047976
Coordinated Regulator	mbr-1	M00707_2.00	RIR	160	60	27.1365	2.21105	1.12e-09	0.0398423
Other	nsy-7	M00966_2.00	RIR	160	82	42.9422	1.90954	1.38e-10	0.695866
Coordinated Regulator	ztf-11	M00650_2.00	RIS	173	125	111.14	1.1247	0.0181354	0.0015795
Coordinated Regulator	lim-6	M00432_2.00	RIS	173	68	45.3723	1.49871	0.000162091	0.0103584
Coordinated Regulator	ceh-58	M00676_2.00	RIS	173	86	56.8574	1.51256	5.48e-06	0.0131238
Coordinated Regulator	nhr-67	M02408_2.00	RIS	173	76	52.1996	1.45595	0.000127519	0.0428472
Other	ztf-9	M00636_2.00	RIS	173	72	45.9577	1.56666	1.94e-05	0.0812827
Other	ceh-74	M01248_2.00	RIS	173	56	39.3284	1.42391	0.00285425	0.0956014
Other	irx-1	M02064_2.00	RIS	173	53	33.5772	1.57845	0.000373149	0.0989743
Other	ztf-3	M00640_2.00	RIS	173	90	57.8044	1.55697	6.48e-07	0.183862
Other	ceh-38	M03716_2.00	RIS	173	105	84.5887	1.2413	0.00150985	0.634943
Other	ceh-62	M02187_2.00	RIS	173	54	35.5402	1.51941	0.000806778	0.710856
Other	ceh-48	M01905_2.00	RIS	173	106	83.9946	1.26199	0.000672489	0.928936
Coordinated Regulator	ztf-11	M00650_2.00	RIV	127	98	81.5887	1.20115	0.00152404	5.17e-07
Coordinated Regulator	ztf-9	M00636_2.00	RIV	127	67	33.7377	1.98591	9.26e-10	5.96e-06
Coordinated Regulator	ztf-3	M00640_2.00	RIV	127	67	42.4345	1.57891	9.12e-06	0.000405549
Coordinated Regulator	lim-4	M02182_2.00	RIV	127	71	44.5834	1.59252	2.35e-06	0.00131061
Coordinated Regulator	ceh-74	M01248_2.00	RIV	127	50	28.8711	1.73184	2.98e-05	0.00221983
Piecemeal Regulator	ceh-48	M01905_2.00	RIV	127	69	61.6608	1.11903	0.120807	0.00469883
Coordinated Regulator	xbp-1	M00597_2.00	RIV	127	63	32.6317	1.93064	1.5e-08	0.00765361
Coordinated Regulator	ceh-58	M00676_2.00	RIV	127	65	41.7392	1.55729	2.36e-05	0.0110091
Coordinated Regulator	ceh-1	M00557_2.00	RIV	127	62	36.4365	1.70159	2.31e-06	0.0137001
Coordinated Regulator	ceh-9	M03847_2.00	RIV	127	72	48.1038	1.49676	2.05e-05	0.0150693
Coordinated Regulator	unc-42	M03874_2.00	RIV	127	62	38.3895	1.61503	1.38e-05	0.025142
Piecemeal Regulator	ceh-38	M03716_2.00	RIV	127	72	62.0969	1.15948	0.0524627	0.0272016
Other	vab-3	M00342_2.00	RIV	127	80	47.9774	1.66745	1.76e-08	0.160962
Piecemeal Regulator	ztf-11	M00650_2.00	RMD	153	106	98.2919	1.07842	0.119475	1.6e-08
Coordinated Regulator	ztf-3	M00640_2.00	RMD	153	78	51.1218	1.52577	8.95e-06	4.14e-05
Coordinated Regulator	unc-42	M03874_2.00	RMD	153	65	46.2487	1.40544	0.00112503	0.00335223
Coordinated Regulator	ztf-9	M00636_2.00	RMD	153	69	40.6447	1.69764	1.13e-06	0.00899046
Coordinated Regulator	ceh-58	M00676_2.00	RMD	153	73	50.2843	1.45175	0.000137613	0.00935816
Piecemeal Regulator	ceh-48	M01905_2.00	RMD	153	83	74.2843	1.11733	0.0992572	0.0318384
Coordinated Regulator	ceh-32	M00483_2.00	RMD	153	45	24.4264	1.84227	3.24e-05	0.0337636
Other	ceh-74	M01248_2.00	RMD	153	63	34.7817	1.8113	5.2e-07	0.117716
Other	nsy-7	M00966_2.00	RMD	153	61	41.0635	1.48551	0.000417168	0.204801
Other	ceh-38	M03716_2.00	RMD	153	87	74.8096	1.16295	0.0329165	0.237528
Piecemeal Regulator	ztf-11	M00650_2.00	RME	69	47	44.3277	1.06028	0.309362	0.000557943
Coordinated Regulator	ceh-74	M01248_2.00	RME	69	27	15.6859	1.72129	0.00207895	0.00370279
Coordinated Regulator	ztf-3	M00640_2.00	RME	69	41	23.0549	1.77836	1.4e-05	0.0106717
Other	ceh-38	M03716_2.00	RME	69	38	33.7377	1.12634	0.19381	0.053857
Other	ceh-48	M01905_2.00	RME	69	42	33.5007	1.2537	0.0306124	0.0827582
Other	ztf-9	M00636_2.00	RME	69	29	18.3299	1.58211	0.00473415	0.252687
Other	lim-7	M01242_2.00	RME	69	37	25.6029	1.44515	0.00466866	0.331688
Other	ceh-32	M00483_2.00	RME	69	16	11.0158	1.45246	0.081932	0.436436
Other	nhr-67	M02408_2.00	RME	69	37	20.8195	1.77718	6.26e-05	0.444004
Other	ceh-58	M00676_2.00	RME	69	43	22.6772	1.89618	9.82e-07	0.703055
Other	lim-6	M00432_2.00	RME	69	33	18.0964	1.82356	0.000139915	0.896882
Piecemeal Regulator	ztf-11	M00650_2.00	RMF	198	129	127.201	1.01414	0.442073	4.01e-07
Coordinated Regulator	ceh-58	M00676_2.00	RMF	198	78	65.0738	1.19864	0.0349624	1.09e-06
Coordinated Regulator	unc-42	M03874_2.00	RMF	198	76	59.8513	1.26981	0.0101547	1.67e-06
Coordinated Regulator	ztf-9	M00636_2.00	RMF	198	74	52.599	1.40687	0.000717878	0.000130886
Coordinated Regulator	ceh-74	M01248_2.00	RMF	198	56	45.0116	1.24412	0.0442968	0.000143174
Coordinated Regulator	ztf-3	M00640_2.00	RMF	198	96	66.1577	1.45108	1.26e-05	0.000235283
Coordinated Regulator	lim-4	M02182_2.00	RMF	198	87	69.5079	1.25166	0.00742191	0.000375933
Piecemeal Regulator	ceh-38	M03716_2.00	RMF	198	105	96.8125	1.08457	0.146409	0.0146777
Coordinated Regulator	ceh-48	M01905_2.00	RMF	198	109	96.1326	1.13385	0.0434844	0.0304727
Other	xbp-1	M00597_2.00	RMF	198	72	50.8746	1.41524	0.000750219	0.852094
Coordinated Regulator	unc-86	M03312_2.00	RMG	97	85	66.8727	1.27107	2.42e-05	2.26e-09
Coordinated Regulator	ztf-11	M00650_2.00	RMG	97	78	62.3158	1.25169	0.000533616	7.93e-09
Coordinated Regulator	egl-13	M00710_2.00	RMG	97	78	56.5761	1.37867	5.8e-06	2.47e-05
Coordinated Regulator	unc-86	M02244_2.00	RMG	97	54	27.9501	1.93201	6.35e-08	0.000491195
Coordinated Regulator	unc-62	M02185_2.00	RMG	97	59	31.0396	1.9008	1.22e-08	0.0013532
Coordinated Regulator	ztf-9	M00636_2.00	RMG	97	52	25.7682	2.01799	3.4e-08	0.0176775
Coordinated Regulator	ztf-3	M00640_2.00	RMG	97	65	32.4106	2.00552	4.78e-11	0.0291125
Other	tbx-2	M00830_2.00	RMG	97	56	32.2658	1.73559	1.23e-06	0.058316
Other	ceh-74	M01248_2.00	RMG	97	48	22.0512	2.17676	1.76e-08	0.0757282
Other	ceh-58	M00676_2.00	RMG	97	53	31.8796	1.66251	1.33e-05	0.145104
Other	ceh-38	M03716_2.00	RMG	97	54	47.4283	1.13856	0.117219	0.245297
Other	ceh-48	M01905_2.00	RMG	97	61	47.0953	1.29525	0.00388779	0.394084
Other	ceh-13	M00450_2.00	RMG	97	56	31.9134	1.75475	8.43e-07	0.647181
Coordinated Regulator	ztf-11	M00650_2.00	RMH	127	96	81.5887	1.17663	0.00503756	3.67e-05
Coordinated Regulator	sem-2	M02488_2.00	RMH	127	73	43.4836	1.67879	1.45e-07	9.8e-05
Coordinated Regulator	fkh-10	M03750_2.00	RMH	127	46	29.6232	1.55284	0.000940643	0.00578914
Coordinated Regulator	lim-4	M02182_2.00	RMH	127	66	44.5834	1.48037	0.000104563	0.0437934
Other	ztf-3	M00640_2.00	RMH	127	70	42.4345	1.6496	7.72e-07	0.0692606
Other	ztf-9	M00636_2.00	RMH	127	63	33.7377	1.86735	5.55e-08	0.0845868
Other	ceh-58	M00676_2.00	RMH	127	64	41.7392	1.53333	4.88e-05	0.0895427
Other	ceh-32	M00483_2.00	RMH	127	29	20.2755	1.4303	0.030704	0.142398
Other	unc-42	M03874_2.00	RMH	127	55	38.3895	1.43268	0.00156751	0.152212
Other	ceh-38	M03716_2.00	RMH	127	74	62.0969	1.19169	0.0244692	0.394084
Other	ceh-74	M01248_2.00	RMH	127	55	28.8711	1.90502	4.18e-07	0.530134
Other	ceh-48	M01905_2.00	RMH	127	80	61.6608	1.29742	0.000961003	0.646585
Coordinated Regulator	ztf-11	M00650_2.00	SAA	80	69	51.3944	1.34256	1.57e-05	1.01e-06
Coordinated Regulator	unc-3	OH2011_UNC-3	SAA	80	36	16.2715	2.21245	1.09e-06	1.53e-05
Coordinated Regulator	ceh-18	M00681_2.00	SAA	80	52	36.9543	1.40714	0.00071931	0.000133586
Coordinated Regulator	ceh-58	M00676_2.00	SAA	80	41	26.2924	1.55938	0.000678836	0.000306812
Coordinated Regulator	lim-4	M02182_2.00	SAA	80	42	28.084	1.49551	0.00137049	0.000427293
Coordinated Regulator	vab-3	M00342_2.00	SAA	80	46	30.222	1.52207	0.000370654	0.0033142
Coordinated Regulator	ceh-74	M01248_2.00	SAA	80	35	18.1865	1.9245	3.84e-05	0.00419477
Coordinated Regulator	ztf-3	M00640_2.00	SAA	80	45	26.7304	1.68348	3.54e-05	0.00785729
Coordinated Regulator	unc-42	M03874_2.00	SAA	80	43	24.1823	1.77816	1.61e-05	0.0269882
Other	ztf-9	M00636_2.00	SAA	80	42	21.2521	1.97627	1.39e-06	0.062788
Other	ceh-38	M03716_2.00	SAA	80	48	39.1162	1.22711	0.0341546	0.225484
Other	ceh-9	M03847_2.00	SAA	80	44	30.3016	1.45207	0.00176327	0.323877
Other	ceh-48	M01905_2.00	SAA	80	54	38.8414	1.39027	0.000640477	0.64426
Coordinated Regulator	unc-3	OH2011_UNC-3	SAB	147	96	29.8989	3.21082	1e-30	1.49e-18
Coordinated Regulator	ztf-11	M00650_2.00	SAB	147	123	94.4373	1.30245	2.98e-07	2.17e-14
Coordinated Regulator	fax-1	M06432_2.00	SAB	147	120	91.8622	1.3063	6.95e-07	1.85e-11
Coordinated Regulator	ceh-18	M00681_2.00	SAB	147	101	67.9036	1.4874	6.16e-08	4.27e-10
Coordinated Regulator	elt-1	M08206_2.00	SAB	147	75	47.6978	1.5724	4.05e-06	1.12e-07
Coordinated Regulator	gei-3	M00711_2.00	SAB	147	82	49.9583	1.64137	1.02e-07	1.57e-07
Coordinated Regulator	unc-62	M02185_2.00	SAB	147	82	47.0394	1.74322	5.65e-09	2.09e-07
Coordinated Regulator	ztf-3	M00640_2.00	SAB	147	97	49.117	1.97487	3.78e-15	2.13e-06
Coordinated Regulator	ztf-9	M00636_2.00	SAB	147	78	39.0508	1.9974	2.85e-11	2.12e-05
Coordinated Regulator	ceh-74	M01248_2.00	SAB	147	69	33.4177	2.06477	2.7e-10	4.83e-05
Coordinated Regulator	ceh-58	M00676_2.00	SAB	147	85	48.3123	1.75939	1.2e-09	0.00030389
Coordinated Regulator	ces-1	M00608_2.00	SAB	147	44	23.0515	1.90877	1.61e-05	0.000767065
Coordinated Regulator	ceh-38	M03716_2.00	SAB	147	88	71.8759	1.22433	0.0058979	0.0162152
Coordinated Regulator	nsy-7	M00966_2.00	SAB	147	70	39.4531	1.77426	1.18e-07	0.0203838
Coordinated Regulator	egl-44	M09438_2.00	SAB	147	90	53.5869	1.67952	2.39e-09	0.0276327
Other	ceh-48	M01905_2.00	SAB	147	94	71.3712	1.31706	0.000170992	0.0530486
Other	irx-1	M02064_2.00	SAB	147	59	28.5309	2.06793	1.27e-08	0.503949
Coordinated Regulator	unc-86	M03312_2.00	SDQ	98	85	67.5622	1.2581	5.58e-05	4.39e-10
Coordinated Regulator	ztf-11	M00650_2.00	SDQ	98	80	62.9582	1.27068	0.00018355	1.23e-08
Coordinated Regulator	lin-39	M08211_2.00	SDQ	98	69	40.787	1.69172	1.82e-08	7.05e-07
Coordinated Regulator	ztf-3	M00640_2.00	SDQ	98	59	32.7447	1.80182	1.07e-07	1.25e-05
Coordinated Regulator	unc-62	M02185_2.00	SDQ	98	57	31.3596	1.81762	1.77e-07	0.00023243
Coordinated Regulator	ceh-18	M00681_2.00	SDQ	98	74	45.269	1.63467	8.12e-09	0.00118727
Coordinated Regulator	ceh-43	M00423_2.00	SDQ	98	58	35.6124	1.62865	6.05e-06	0.00135461
Coordinated Regulator	ceh-48	M01905_2.00	SDQ	98	58	47.5808	1.21898	0.0257018	0.00214695
Coordinated Regulator	unc-86	M02244_2.00	SDQ	98	50	28.2383	1.77065	5.32e-06	0.00244809
Coordinated Regulator	ceh-58	M00676_2.00	SDQ	98	61	32.2082	1.89393	6.17e-09	0.015295
Coordinated Regulator	ceh-38	M03716_2.00	SDQ	98	59	47.9173	1.23129	0.0186676	0.0276906
Coordinated Regulator	ztf-9	M00636_2.00	SDQ	98	50	26.0338	1.92058	4.37e-07	0.0293046
Other	mxl-3	M00935_2.00	SDQ	98	46	23.2198	1.98107	8.06e-07	0.281034
Other	ceh-74	M01248_2.00	SDQ	98	46	22.2785	2.06477	2.37e-07	0.642065
Coordinated Regulator	cebp-1	M00604_2.00	SIA	583	424	383.183	1.10652	0.000207406	8.1e-18
Coordinated Regulator	ceh-48	M01905_2.00	SIA	583	313	283.057	1.10578	0.00812724	7.95e-10
Piecemeal Regulator	ztf-11	M00650_2.00	SIA	583	350	374.537	0.934487	0.993988	2.51e-09
Coordinated Regulator	ceh-38	M03716_2.00	SIA	583	319	285.059	1.11907	0.0031255	3.84e-08
Coordinated Regulator	ztf-3	M00640_2.00	SIA	583	242	194.798	1.24232	3.37e-05	2.45e-07
Coordinated Regulator	ceh-18	M00681_2.00	SIA	583	294	269.305	1.0917	0.0242222	4.92e-07
Piecemeal Regulator	syd-9	M00646_2.00	SIA	583	230	233.879	0.983415	0.664399	1.03e-05
Piecemeal Regulator	atf-5	M00593_2.00	SIA	583	194	177.65	1.09203	0.0819352	5.54e-05
Piecemeal Regulator	ztf-9	M00636_2.00	SIA	583	173	154.875	1.11703	0.0534917	0.000184671
Piecemeal Regulator	ceh-58	M00676_2.00	SIA	583	206	191.606	1.07512	0.116483	0.000230148
Piecemeal Regulator	ceh-74	M01248_2.00	SIA	583	143	132.534	1.07897	0.169707	0.00255855
Piecemeal Regulator	nhr-67	M02408_2.00	SIA	583	174	175.91	0.989144	0.604002	0.00339553
Piecemeal Regulator	lim-4	M02182_2.00	SIA	583	217	204.662	1.06028	0.15929	0.00393417
Other	mdl-1	M08183_2.00	SIA	583	166	158.124	1.04981	0.255313	0.0602792
Other	hlh-16	M00589_2.00	SIA	583	239	228.569	1.04563	0.208041	0.0893423
Other	xbp-1	M00597_2.00	SIA	583	188	149.797	1.25503	0.000278004	0.425289
Coordinated Regulator	cebp-1	M00604_2.00	SIB	336	256	220.84	1.15921	2.96e-05	1.01e-12
Piecemeal Regulator	ztf-11	M00650_2.00	SIB	336	208	215.857	0.963602	0.84825	3.4e-09
Piecemeal Regulator	ceh-58	M00676_2.00	SIB	336	125	110.428	1.13196	0.0563289	1.07e-06
Coordinated Regulator	ztf-9	M00636_2.00	SIB	336	108	89.2589	1.20996	0.0150134	1.47e-06
Piecemeal Regulator	fax-1	M06432_2.00	SIB	336	220	209.971	1.04777	0.149604	7.86e-06
Coordinated Regulator	ceh-48	M01905_2.00	SIB	336	181	163.134	1.10952	0.032071	4.84e-05
Coordinated Regulator	ceh-38	M03716_2.00	SIB	336	184	164.288	1.11999	0.0201784	0.000142186
Piecemeal Regulator	zip-3	M00601_2.00	SIB	336	131	115.896	1.13032	0.0519166	0.000572624
Piecemeal Regulator	lim-4	M02182_2.00	SIB	336	126	117.953	1.06822	0.203617	0.000982903
Piecemeal Regulator	syd-9	M00646_2.00	SIB	336	141	134.791	1.04606	0.273697	0.00121518
Coordinated Regulator	ztf-3	M00640_2.00	SIB	336	142	112.268	1.26484	0.00054607	0.00152222
Piecemeal Regulator	unc-42	M03874_2.00	SIB	336	111	101.566	1.09289	0.152888	0.00914392
Coordinated Regulator	ceh-74	M01248_2.00	SIB	336	97	76.3834	1.26991	0.00608218	0.0244299
Other	xbp-1	M00597_2.00	SIB	336	111	86.3326	1.28572	0.00191704	0.099516
Other	hlh-16	M00589_2.00	SIB	336	150	131.731	1.13868	0.0268675	0.5113
Coordinated Regulator	cebp-1	M00604_2.00	SMB	534	416	350.977	1.18526	1.02e-09	2e-30
Coordinated Regulator	ztf-11	M00650_2.00	SMB	534	377	343.058	1.09894	0.00128045	5.09e-25
Coordinated Regulator	ceh-18	M00681_2.00	SMB	534	317	246.67	1.28512	1.25e-09	2.36e-17
Coordinated Regulator	lim-4	M02182_2.00	SMB	534	253	187.461	1.34962	6.19e-09	6.64e-14
Coordinated Regulator	ceh-38	M03716_2.00	SMB	534	306	261.1	1.17196	7.45e-05	7.66e-14
Coordinated Regulator	ztf-9	M00636_2.00	SMB	534	210	141.858	1.48035	1.72e-10	2.59e-13
Coordinated Regulator	ztf-3	M00640_2.00	SMB	534	284	178.425	1.5917	1.75e-20	2.81e-13
Coordinated Regulator	ceh-48	M01905_2.00	SMB	534	314	259.267	1.21111	1.79e-06	2.09e-12
Coordinated Regulator	atf-5	M00593_2.00	SMB	534	243	162.719	1.49337	4.6e-13	7.66e-11
Coordinated Regulator	ceh-58	M00676_2.00	SMB	534	251	175.502	1.43018	1.75e-11	2.66e-08
Coordinated Regulator	crh-2	M00603_2.00	SMB	534	220	160.886	1.36743	5.72e-08	7.57e-05
Coordinated Regulator	ceh-74	M01248_2.00	SMB	534	194	121.395	1.59809	1.77e-12	0.00027495
Coordinated Regulator	vab-3	M00342_2.00	SMB	534	277	201.732	1.37311	5.1e-11	0.000300566
Other	xbp-1	M00597_2.00	SMB	534	218	137.207	1.58884	3.98e-14	0.0616318
Other	mdl-1	M08183_2.00	SMB	534	214	144.834	1.47755	1.17e-10	0.102522
Coordinated Regulator	ztf-11	M00650_2.00	SMD	402	317	258.257	1.22746	3.09e-10	1.01e-39
Coordinated Regulator	ztf-3	M00640_2.00	SMD	402	260	134.32	1.93567	2.52e-36	5.11e-21
Coordinated Regulator	ztf-9	M00636_2.00	SMD	402	208	106.792	1.94771	5.74e-26	1.51e-16
Coordinated Regulator	lim-4	M02182_2.00	SMD	402	243	141.122	1.72191	2.82e-24	7.29e-14
Coordinated Regulator	ceh-38	M03716_2.00	SMD	402	267	196.559	1.35837	2.65e-12	5.07e-13
Coordinated Regulator	ceh-48	M01905_2.00	SMD	402	268	195.178	1.3731	4.91e-13	2.02e-10
Coordinated Regulator	ceh-58	M00676_2.00	SMD	402	234	132.119	1.77112	1.25e-24	3.05e-10
Coordinated Regulator	xbp-1	M00597_2.00	SMD	402	205	103.291	1.98469	1.54e-26	3.9e-09
Coordinated Regulator	ceh-74	M01248_2.00	SMD	402	196	91.3873	2.14472	2.46e-29	4.3e-09
Coordinated Regulator	tbx-2	M00830_2.00	SMD	402	238	133.72	1.77984	1.23e-25	7.01e-09
Coordinated Regulator	ceh-32	M00483_2.00	SMD	402	122	64.1792	1.90093	1.12e-12	1.11e-08
Coordinated Regulator	hlh-16	M00589_2.00	SMD	402	259	157.607	1.64333	1.03e-23	1.89e-07
Coordinated Regulator	unc-42	M03874_2.00	SMD	402	218	121.516	1.794	7.47e-23	3.52e-07
Coordinated Regulator	mdl-1	M08183_2.00	SMD	402	198	109.033	1.81597	1.68e-20	0.000687068
Other	fkh-10	M03750_2.00	SMD	402	181	93.768	1.9303	4.87e-21	0.412937
Coordinated Regulator	ztf-11	M00650_2.00	URA	170	134	109.213	1.22696	4.02e-05	2.46e-18
Coordinated Regulator	unc-86	M03312_2.00	URA	170	139	117.2	1.18601	0.000156885	2.81e-13
Coordinated Regulator	cfi-1	M01667_2.00	URA	170	122	98.291	1.24121	0.000163192	1.7e-12
Coordinated Regulator	ztf-3	M00640_2.00	URA	170	109	56.802	1.91895	1.45e-15	6.93e-10
Coordinated Regulator	unc-86	M02244_2.00	URA	170	87	48.9848	1.77606	1.86e-09	1.83e-09
Coordinated Regulator	ztf-9	M00636_2.00	URA	170	86	45.1607	1.90431	6.7e-11	7.69e-07
Coordinated Regulator	egl-43	M00611_2.00	URA	170	87	39.0186	2.22971	5.34e-15	2.15e-06
Coordinated Regulator	vab-3	M00342_2.00	URA	170	109	64.2217	1.69725	1.08e-11	8.83e-05
Coordinated Regulator	ceh-58	M00676_2.00	URA	170	98	55.8714	1.75403	8.43e-11	0.000104386
Coordinated Regulator	ceh-74	M01248_2.00	URA	170	85	38.6464	2.19943	3.24e-14	0.000111497
Coordinated Regulator	ceh-38	M03716_2.00	URA	170	104	83.1218	1.25118	0.00109583	0.00153921
Coordinated Regulator	ceh-48	M01905_2.00	URA	170	104	82.5381	1.26002	0.000812735	0.00559735
Coordinated Regulator	unc-86	M03312_2.00	URB	271	232	186.83	1.24177	4.4e-10	1.66e-20
Coordinated Regulator	ztf-11	M00650_2.00	URB	271	214	174.099	1.22919	1.84e-07	2.09e-18
Coordinated Regulator	ztf-3	M00640_2.00	URB	271	165	90.5491	1.82222	1.37e-19	6.22e-11
Coordinated Regulator	unc-86	M02244_2.00	URB	271	136	78.0875	1.74164	3.68e-13	1.59e-10
Coordinated Regulator	ceh-43	M00423_2.00	URB	271	170	98.4792	1.72625	5.8e-18	6.22e-09
Coordinated Regulator	ztf-9	M00636_2.00	URB	271	135	71.9915	1.87522	1.28e-15	2.64e-07
Coordinated Regulator	ceh-58	M00676_2.00	URB	271	151	89.0656	1.69538	3.25e-14	1.92e-06
Coordinated Regulator	vab-3	M00342_2.00	URB	271	177	102.377	1.72891	2.65e-19	6.37e-06
Coordinated Regulator	ceh-48	M01905_2.00	URB	271	161	131.575	1.22363	0.000281203	6.85e-06
Coordinated Regulator	ceh-74	M01248_2.00	URB	271	117	61.6068	1.89914	2.28e-13	7.09e-06
Coordinated Regulator	ceh-38	M03716_2.00	URB	271	170	132.506	1.28296	4.98e-06	0.000196914
Coordinated Regulator	mnm-2	M00616_2.00	URB	271	102	60.1368	1.69613	1.27e-08	0.0303598
Coordinated Regulator	unc-86	M03312_2.00	URX	353	284	243.362	1.16699	1.23e-06	2.03e-21
Coordinated Regulator	ztf-11	M00650_2.00	URX	353	251	226.778	1.10681	0.00442329	3.9e-15
Coordinated Regulator	fax-1	M06432_2.00	URX	353	262	220.594	1.1877	3.01e-06	1.87e-10
Coordinated Regulator	unc-86	M02244_2.00	URX	353	155	101.715	1.52386	2.41e-09	3.68e-09
Coordinated Regulator	fkh-8	M03026_2.00	URX	353	164	116.367	1.40934	1.66e-07	4.62e-09
Coordinated Regulator	egl-13	M00710_2.00	URX	353	247	205.89	1.19967	6.05e-06	6.45e-09
Coordinated Regulator	ztf-3	M00640_2.00	URX	353	186	117.948	1.57697	2.21e-13	3.1e-08
Coordinated Regulator	ceh-74	M01248_2.00	URX	353	138	80.248	1.71967	1.04e-11	2.91e-07
Coordinated Regulator	ceh-58	M00676_2.00	URX	353	151	116.015	1.30155	8.46e-05	2.74e-06
Coordinated Regulator	ceh-48	M01905_2.00	URX	353	209	171.388	1.21946	5.1e-05	1.08e-05
Coordinated Regulator	ztf-9	M00636_2.00	URX	353	145	93.775	1.54626	4.79e-09	0.000165296
Coordinated Regulator	ceh-38	M03716_2.00	URX	353	209	172.6	1.21089	8.58e-05	0.000342649
Coordinated Regulator	daf-19	M00709_2.00	URX	353	112	71.1481	1.57418	3.29e-07	0.00129624
Coordinated Regulator	atf-5	M00593_2.00	URX	353	173	107.565	1.60832	7.32e-13	0.00610761
Other	mnm-2	M00616_2.00	URX	353	136	78.3332	1.73617	8.28e-12	0.319937
Piecemeal Regulator	unc-86	M03312_2.00	URY	79	61	54.4634	1.12002	0.074655	4.79e-06
Piecemeal Regulator	ztf-11	M00650_2.00	URY	79	55	50.752	1.0837	0.201524	9.61e-06
Coordinated Regulator	ceh-74	M01248_2.00	URY	79	26	17.9592	1.44773	0.0284203	0.00336767
Coordinated Regulator	unc-86	M02244_2.00	URY	79	34	22.7635	1.49362	0.00591955	0.0158532
Coordinated Regulator	ztf-9	M00636_2.00	URY	79	33	20.9865	1.57244	0.00302062	0.0166261
Piecemeal Regulator	lim-7	M01242_2.00	URY	79	36	29.3134	1.22811	0.0828613	0.0292526
Other	ceh-18	M00681_2.00	URY	79	45	36.4924	1.23313	0.0399174	0.056476
Other	ceh-38	M03716_2.00	URY	79	38	38.6272	0.983763	0.618535	0.267429
Other	ceh-48	M01905_2.00	URY	79	35	38.3559	0.912506	0.825821	0.394697
Other	ztf-3	M00640_2.00	URY	79	36	26.3962	1.36383	0.0191244	0.517563
Other	ceh-58	M00676_2.00	URY	79	34	25.9638	1.30952	0.0420223	0.637737
Other	nsy-7	M00966_2.00	URY	79	31	21.2027	1.46208	0.0130154	0.711306
Other	vab-3	M00342_2.00	URY	79	49	29.8442	1.64186	1.75e-05	0.761774
Other	ceh-32	M00483_2.00	URY	79	26	12.6123	2.06148	0.000218392	0.797926
Coordinated Regulator	unc-3	OH2011_UNC-3	VA	366	231	74.4422	3.10308	2.3e-69	2.05e-35
Coordinated Regulator	ztf-11	M00650_2.00	VA	366	299	235.13	1.27164	5.08e-13	1.01e-31
Coordinated Regulator	pag-3	M00619_2.00	VA	366	254	180.505	1.40717	1.89e-14	9.71e-24
Coordinated Regulator	egl-5	M09581_2.00	VA	366	281	183.437	1.53186	8.67e-25	5.31e-22
Coordinated Regulator	ztf-3	M00640_2.00	VA	366	257	122.291	2.10154	1.95e-45	1.44e-21
Coordinated Regulator	lin-39	M08211_2.00	VA	366	248	152.327	1.62808	3.82e-23	4.67e-20
Coordinated Regulator	mab-5	M01240_2.00	VA	366	252	177.973	1.41595	1.33e-14	1.28e-19
Coordinated Regulator	ceh-18	M00681_2.00	VA	366	261	169.066	1.54378	1.22e-21	4.79e-18
Coordinated Regulator	ceh-38	M03716_2.00	VA	366	236	178.956	1.31876	2.81e-09	2.77e-15
Coordinated Regulator	unc-62	M02185_2.00	VA	366	207	117.119	1.76744	1.94e-21	1.1e-12
Coordinated Regulator	ztf-9	M00636_2.00	VA	366	196	97.2284	2.01587	6.6e-27	2.33e-11
Coordinated Regulator	ceh-58	M00676_2.00	VA	366	210	120.288	1.74581	3.21e-21	5.39e-10
Coordinated Regulator	ceh-48	M01905_2.00	VA	366	247	177.7	1.38999	5.75e-13	1.88e-09
Coordinated Regulator	ceh-13	M00450_2.00	VA	366	199	120.415	1.65261	9.7e-17	4.23e-08
Coordinated Regulator	vab-3	M00342_2.00	VA	366	225	138.265	1.6273	2.01e-19	3.6e-07
Coordinated Regulator	ceh-74	M01248_2.00	VA	366	189	83.2033	2.27154	2.51e-32	0.000350996
Other	lin-15B	M09654_2.0	VA	366	190	122.765	1.54767	1.03e-12	0.0866946
Other	nsy-7	M00966_2.00	VA	366	168	98.2302	1.71027	1.43e-14	0.560005
Coordinated Regulator	cebp-1	M00604_2.00	VB	1275	975	838.008	1.16347	4.42e-17	3.35e-47
Coordinated Regulator	ceh-48	M01905_2.00	VB	1275	777	619.036	1.25518	3.36e-19	1.12e-36
Piecemeal Regulator	ztf-11	M00650_2.00	VB	1275	819	819.099	0.999879	0.532878	2.62e-33
Coordinated Regulator	ceh-38	M03716_2.00	VB	1275	781	623.414	1.25278	3.95e-19	2.49e-29
Coordinated Regulator	atf-7	M00595_2.00	VB	1275	544	431.662	1.26024	3.2e-11	6.65e-26
Coordinated Regulator	ztf-6	M00631_2.00	VB	1275	790	741.688	1.06514	0.00309844	2.27e-25
Coordinated Regulator	unc-3	OH2011_UNC-3	VB	1275	413	259.327	1.59258	1.89e-24	2.96e-25
Coordinated Regulator	ceh-18	M00681_2.00	VB	1275	680	588.959	1.15458	1.7e-07	1.42e-23
Coordinated Regulator	mab-5	M01240_2.00	VB	1275	728	619.987	1.17422	7.19e-10	9.07e-23
Coordinated Regulator	pag-3	M00619_2.00	VB	1275	710	628.807	1.12912	2.73e-06	2.21e-22
Coordinated Regulator	ztf-3	M00640_2.00	VB	1275	603	426.015	1.41544	4.54e-25	9.97e-22
Coordinated Regulator	2020-06-01	M00599_2.00	VB	1275	505	391.815	1.28887	8.92e-12	1.96e-21
Coordinated Regulator	lin-39	M08211_2.00	VB	1275	616	530.647	1.16085	7.36e-07	1.08e-17
Coordinated Regulator	cey-1	M01903_2.00	VB	1275	378	272.145	1.38897	1.62e-12	5.07e-13
Coordinated Regulator	ztf-9	M00636_2.00	VB	1275	431	338.706	1.27249	5.67e-09	4.79e-10
Coordinated Regulator	ceh-58	M00676_2.00	VB	1275	479	419.036	1.1431	0.00020814	8.6e-09
Coordinated Regulator	ceh-13	M00450_2.00	VB	1275	474	419.48	1.12997	0.000661822	2.04e-08
Coordinated Regulator	lin-15B	M09654_2.0	VB	1275	584	427.665	1.36555	5.32e-20	5.47e-08
Coordinated Regulator	crh-2	M00603_2.00	VB	1275	488	384.137	1.27038	2.71e-10	6.11e-08
Coordinated Regulator	unc-62	M02185_2.00	VB	1275	476	407.995	1.16668	2.85e-05	2.02e-07
Coordinated Regulator	mbr-1	M00707_2.00	VB	1275	308	216.244	1.42432	3.1e-11	4.75e-07
Coordinated Regulator	ceh-74	M01248_2.00	VB	1275	378	289.848	1.30413	5.55e-09	2.94e-06
Coordinated Regulator	vab-3	M00342_2.00	VB	1275	554	481.662	1.15018	1.74e-05	2.71e-05
Coordinated Regulator	xbp-1	M00597_2.00	VB	1275	451	327.602	1.37667	9.31e-15	0.00137316
Other	nsy-7	M00966_2.00	VB	1275	403	342.195	1.17769	8.05e-05	0.31522
Other	ceh-12	M03871_2.00	VB	1275	404	329.949	1.22443	1.79e-06	0.589261
Piecemeal Regulator	ztf-11	M00650_2.00	VC	309	191	198.511	0.962163	0.84825	1.01e-12
Piecemeal Regulator	pag-3	M00619_2.00	VC	309	158	152.393	1.03679	0.292728	5.12e-12
Coordinated Regulator	ztf-3	M00640_2.00	VC	309	145	103.246	1.40441	9.81e-07	4.53e-10
Coordinated Regulator	lin-39	M08211_2.00	VC	309	176	128.604	1.36854	7.43e-08	6.07e-09
Coordinated Regulator	ceh-48	M01905_2.00	VC	309	171	150.025	1.13981	0.0113568	4.96e-07
Coordinated Regulator	ztf-9	M00636_2.00	VC	309	129	82.0863	1.57152	1.07e-08	6.6e-07
Coordinated Regulator	vab-7	M02186_2.00	VC	309	194	146.611	1.32323	7.79e-08	1.19e-06
Coordinated Regulator	ceh-38	M03716_2.00	VC	309	168	151.086	1.11195	0.0341221	2.39e-06
Coordinated Regulator	zip-11	M00606_2.00	VC	309	132	95.3111	1.38494	1.04e-05	3.96e-05
Coordinated Regulator	ceh-13	M00450_2.00	VC	309	128	101.662	1.25907	0.00127376	5.34e-05
Coordinated Regulator	mab-5	M01240_2.00	VC	309	183	150.256	1.21792	0.000157039	6.85e-05
Coordinated Regulator	unc-62	M02185_2.00	VC	309	129	98.8788	1.30463	0.000258423	7.04e-05
Coordinated Regulator	ceh-58	M00676_2.00	VC	309	145	101.554	1.4278	3.43e-07	0.00197908
Coordinated Regulator	ceh-74	M01248_2.00	VC	309	107	70.2454	1.52323	2.07e-06	0.0400523
Other	nsy-7	M00966_2.00	VC	309	113	82.9321	1.36256	0.000150197	0.270284
Coordinated Regulator	ztf-11	M00650_2.00	VD_DD	170	134	109.213	1.22696	4.02e-05	1.87e-13
Coordinated Regulator	cebp-1	M00604_2.00	VD_DD	170	138	111.734	1.23507	1.03e-05	1.14e-11
Coordinated Regulator	mab-5	M01240_2.00	VD_DD	170	117	82.665	1.41535	1.55e-07	1.26e-11
Coordinated Regulator	lin-39	M08211_2.00	VD_DD	170	115	70.753	1.62537	2.14e-11	2.67e-11
Coordinated Regulator	ztf-3	M00640_2.00	VD_DD	170	104	56.802	1.83092	4.71e-13	1.41e-09
Coordinated Regulator	egl-5	M09581_2.00	VD_DD	170	129	85.203	1.51403	1.69e-11	3.17e-08
Coordinated Regulator	ceh-18	M00681_2.00	VD_DD	170	112	78.5279	1.42624	3.43e-07	1.39e-07
Coordinated Regulator	elt-1	M08206_2.00	VD_DD	170	79	55.1607	1.43218	0.000136632	3.59e-06
Coordinated Regulator	ztf-9	M00636_2.00	VD_DD	170	83	45.1607	1.83788	1.23e-09	2.26e-05
Coordinated Regulator	ceh-48	M01905_2.00	VD_DD	170	106	82.5381	1.28426	0.000276576	3.27e-05
Coordinated Regulator	ceh-38	M03716_2.00	VD_DD	170	107	83.1218	1.28727	0.000217924	3.65e-05
Coordinated Regulator	ceh-58	M00676_2.00	VD_DD	170	97	55.8714	1.73613	2.23e-10	0.00186188
Coordinated Regulator	ceh-74	M01248_2.00	VD_DD	170	87	38.6464	2.25118	3e-15	0.00215069
Coordinated Regulator	unc-62	M02185_2.00	VD_DD	170	89	54.3993	1.63605	6.47e-08	0.00222393
Coordinated Regulator	vab-3	M00342_2.00	VD_DD	170	95	64.2217	1.47925	2.17e-06	0.0168298
Other	unc-30	M01241_2.00	VD_DD	170	102	43.2487	2.35845	1.55e-20	0.0568655
Other	ceh-13	M00450_2.00	VD_DD	170	88	55.9306	1.57338	5.47e-07	0.0884407
Other	irx-1	M02064_2.00	VD_DD	170	64	32.9949	1.93969	5.22e-08	0.130317
Other	lin-15B	M09654_2.0	VD_DD	170	83	57.022	1.45558	4.02e-05	0.309817
Other	nsy-7	M00966_2.00	VD_DD	170	84	45.6261	1.84105	8.01e-10	0.733051

## Sheet: Supp.Table.2D.Cofactor_results
Co-motif signature	TF A motif signature	TF B motif signature	TFA	TFB	motifA_ID	motifB_ID	neuron_class	common differentially expressed genes with a motif match	expected common differentially expressed genes with both motifs	fold change co-enrichment	hypergeometric test for co-enrichment p value (corrected)	Wilcoxon rank sums test p value (motif A) (corrected)	Wilcoxon rank sums test p value (motif B) (corrected)
co-occurence of coordinated regulators	Coordinated Regulator	Coordinated Regulator	2020-06-01	ztf-3	M00599_2.00	M00640_2.00	ADA	89	28.0316	3.17499	8.65e-24	1.96e-05	4.07e-06
co-occurence of coordinated regulators	Coordinated Regulator	Coordinated Regulator	ceh-18	ztf-3	M00681_2.00	M00640_2.00	ADA	110	42.1359	2.6106	3.65e-23	4.06e-10	0.00014293
co-occurence of coordinated regulators	Coordinated Regulator	Coordinated Regulator	unc-86	ztf-3	M02244_2.00	M00640_2.00	ADA	85	26.2839	3.23392	3.84e-23	2.7e-10	1.17e-05
co-occurence of coordinated regulators	Coordinated Regulator	Coordinated Regulator	ztf-3	ztf-9	M00640_2.00	M00636_2.00	ADA	81	24.232	3.34268	7.28e-23	0.00155078	3.42e-05
co-occurence of coordinated regulators	Coordinated Regulator	Coordinated Regulator	2020-06-01	ceh-18	M00599_2.00	M00681_2.00	ADA	104	38.7533	2.68364	1.36e-22	2.71e-05	2.3e-11
co-occurence of coordinated regulators	Coordinated Regulator	Coordinated Regulator	vab-3	ztf-3	M00342_2.00	M00640_2.00	ADA	97	34.4596	2.81489	2.47e-22	0.00118876	0.00123204
co-occurence of coordinated regulators	Coordinated Regulator	Coordinated Regulator	unc-62	ztf-3	M02185_2.00	M00640_2.00	ADA	87	29.1892	2.98055	2.19e-21	1.93e-07	1.83e-06
co-occurence of coordinated regulators	Coordinated Regulator	Coordinated Regulator	ceh-18	unc-86	M00681_2.00	M02244_2.00	ADA	98	36.3371	2.69697	2.98e-21	3.85e-09	5.51e-09
co-occurence of coordinated regulators	Coordinated Regulator	Coordinated Regulator	2020-06-01	ztf-9	M00599_2.00	M00636_2.00	ADA	75	22.2867	3.36524	3.12e-21	0.0081133	3.45e-07
co-occurence of coordinated regulators	Coordinated Regulator	Coordinated Regulator	ceh-18	vab-3	M00681_2.00	M00342_2.00	ADA	114	47.6399	2.39295	4.66e-21	1.15e-10	0.000727887
co-occurence of coordinated regulators	Coordinated Regulator	Coordinated Regulator	2020-06-01	unc-86	M00599_2.00	M02244_2.00	ADA	78	24.1738	3.22663	4.91e-21	4.9e-06	4.75e-09
co-occurence of coordinated regulators	Coordinated Regulator	Coordinated Regulator	unc-62	ztf-9	M02185_2.00	M00636_2.00	ADA	76	23.207	3.27487	7.73e-21	3.07e-07	2.04e-06
co-occurence of coordinated regulators	Coordinated Regulator	Coordinated Regulator	2020-06-01	vab-3	M00599_2.00	M00342_2.00	ADA	90	31.6932	2.83973	8.68e-21	1.05e-05	0.000406737
co-occurence of coordinated regulators	Coordinated Regulator	Coordinated Regulator	vab-3	ztf-9	M00342_2.00	M00636_2.00	ADA	83	27.3973	3.0295	9.31e-21	9.74e-05	0.000151901
co-occurence of coordinated regulators	Coordinated Regulator	Coordinated Regulator	ceh-14	vab-7	M00435_2.00	M02186_2.00	ADA	147	74.4087	1.97558	1.79e-20	4.76e-09	1.65e-06
co-occurence of coordinated regulators	Coordinated Regulator	Coordinated Regulator	ceh-74	ztf-3	M01248_2.00	M00640_2.00	ADA	70	20.7366	3.37568	7.95e-20	0.0011466	3.5e-05
co-occurence of coordinated regulators	Coordinated Regulator	Coordinated Regulator	ceh-18	ztf-9	M00681_2.00	M00636_2.00	ADA	91	33.5004	2.71639	9.32e-20	3.29e-09	2.76e-06
co-occurence of coordinated regulators	Coordinated Regulator	Coordinated Regulator	vab-7	ztf-3	M02186_2.00	M00640_2.00	ADA	105	43.2799	2.42607	1.57e-19	5.28e-10	4.94e-05
co-occurence of coordinated regulators	Coordinated Regulator	Coordinated Regulator	ceh-74	unc-86	M01248_2.00	M02244_2.00	ADA	64	17.8828	3.57887	2.42e-19	9.86e-05	2.24e-09
co-occurence of coordinated regulators	Coordinated Regulator	Coordinated Regulator	unc-86	vab-3	M02244_2.00	M00342_2.00	ADA	84	29.7172	2.82665	3.77e-19	9.03e-08	0.000430859
co-occurence of coordinated regulators	Coordinated Regulator	Coordinated Regulator	unc-62	ceh-18	M02185_2.00	M00681_2.00	ADA	100	40.3536	2.47809	4.19e-19	4.62e-08	2.3e-09
co-occurence of coordinated regulators	Coordinated Regulator	Coordinated Regulator	vab-7	ztf-9	M02186_2.00	M00636_2.00	ADA	91	34.4099	2.64459	5.43e-19	5.52e-08	6.95e-06
co-occurence of coordinated regulators	Coordinated Regulator	Coordinated Regulator	ceh-58	ztf-9	M00676_2.00	M00636_2.00	ADA	74	23.835	3.10468	5.87e-19	5.16e-05	5.41e-05
co-occurence of coordinated regulators	Coordinated Regulator	Coordinated Regulator	2020-06-01	unc-62	M00599_2.00	M02185_2.00	ADA	79	26.8459	2.94272	6.09e-19	6.76e-06	4.1e-07
co-occurence of coordinated regulators	Coordinated Regulator	Coordinated Regulator	ceh-58	ztf-3	M00676_2.00	M00640_2.00	ADA	84	29.9791	2.80195	6.47e-19	0.000279122	7.63e-06
co-occurence of coordinated regulators	Coordinated Regulator	Coordinated Regulator	ceh-74	vab-3	M01248_2.00	M00342_2.00	ADA	73	23.4453	3.11364	9.29e-19	0.00244035	0.00558097
co-occurence of coordinated regulators	Coordinated Regulator	Coordinated Regulator	lin-31	ztf-3	M00665_2.00	M00640_2.00	ADA	118	54.1294	2.17996	1.23e-18	3.51e-06	0.00123002
co-occurence of coordinated regulators	Coordinated Regulator	Coordinated Regulator	ceh-74	unc-62	M01248_2.00	M02185_2.00	ADA	66	19.8594	3.32336	2.59e-18	0.00292361	3.12e-05
co-occurence of coordinated regulators	Coordinated Regulator	Coordinated Regulator	ceh-74	ceh-18	M01248_2.00	M00681_2.00	ADA	80	28.668	2.79057	7.65e-18	7.25e-05	9e-09
co-occurence of coordinated regulators	Coordinated Regulator	Coordinated Regulator	ceh-74	ztf-9	M01248_2.00	M00636_2.00	ADA	59	16.4867	3.57864	8.24e-18	0.000326115	1.68e-05
co-occurence of coordinated regulators	Coordinated Regulator	Coordinated Regulator	ceh-58	vab-3	M00676_2.00	M00342_2.00	ADA	88	33.895	2.59625	8.51e-18	0.000440028	0.000192545
co-occurence of coordinated regulators	Coordinated Regulator	Coordinated Regulator	ceh-58	ceh-18	M00676_2.00	M00681_2.00	ADA	99	41.4456	2.38867	8.86e-18	0.00706748	1.77e-09
co-occurence of coordinated regulators	Coordinated Regulator	Coordinated Regulator	unc-62	unc-86	M02185_2.00	M02244_2.00	ADA	74	25.1721	2.93976	1.19e-17	1.2e-06	2.72e-10
co-occurence of coordinated regulators	Coordinated Regulator	Coordinated Regulator	vab-3	vab-7	M00342_2.00	M02186_2.00	ADA	109	48.9332	2.22752	1.31e-17	0.00354923	1.33e-09
co-occurence of coordinated regulators	Coordinated Regulator	Coordinated Regulator	ceh-18	vab-7	M00681_2.00	M02186_2.00	ADA	123	59.8338	2.05569	1.64e-17	1.02e-10	1.24e-08
co-occurence of coordinated regulators	Coordinated Regulator	Coordinated Regulator	unc-62	vab-3	M02185_2.00	M00342_2.00	ADA	86	33.002	2.60591	1.88e-17	3.27e-08	0.000237638
co-occurence of coordinated regulators	Coordinated Regulator	Coordinated Regulator	2020-06-01	ceh-74	M00599_2.00	M01248_2.00	ADA	63	19.0719	3.3033	2.44e-17	4.8e-05	4.56e-05
co-occurence of coordinated regulators	Coordinated Regulator	Coordinated Regulator	ceh-14	ztf-3	M00435_2.00	M00640_2.00	ADA	113	52.3998	2.1565	2.58e-17	2.11e-09	0.000158861
co-occurence of coordinated regulators	Coordinated Regulator	Coordinated Regulator	unc-86	ztf-9	M02244_2.00	M00636_2.00	ADA	66	20.8971	3.15833	3.31e-17	8.33e-09	1.69e-06
co-occurence of coordinated regulators	Coordinated Regulator	Coordinated Regulator	2020-06-01	ceh-58	M00599_2.00	M00676_2.00	ADA	77	27.5724	2.79265	3.76e-17	0.000109779	0.000179499
co-occurence of coordinated regulators	Coordinated Regulator	Coordinated Regulator	ceh-14	ztf-9	M00435_2.00	M00636_2.00	ADA	98	41.6608	2.35233	3.99e-17	3.77e-08	5.42e-06
co-occurence of coordinated regulators	Coordinated Regulator	Coordinated Regulator	2020-06-01	vab-7	M00599_2.00	M02186_2.00	ADA	95	39.8054	2.38661	6.09e-17	0.000139458	2.16e-09
co-occurence of coordinated regulators	Coordinated Regulator	Coordinated Regulator	ceh-14	vab-3	M00435_2.00	M00342_2.00	ADA	121	59.2444	2.04239	6.27e-17	4.35e-08	0.00484622
co-occurence of coordinated regulators	Coordinated Regulator	Coordinated Regulator	ceh-18	ceh-14	M00681_2.00	M00435_2.00	ADA	137	72.4419	1.89117	7.29e-17	3.66e-09	4e-08
co-occurence of coordinated regulators	Coordinated Regulator	Coordinated Regulator	ceh-58	unc-62	M00676_2.00	M02185_2.00	ADA	78	28.711	2.71673	1.03e-16	0.00134978	3.3e-08
co-occurence of coordinated regulators	Coordinated Regulator	Coordinated Regulator	vab-3	lin-31	M00342_2.00	M00665_2.00	ADA	121	61.1999	1.97713	8.06e-16	0.00233675	9.87e-08
co-occurence of coordinated regulators	Coordinated Regulator	Coordinated Regulator	unc-62	vab-7	M02185_2.00	M02186_2.00	ADA	95	41.4492	2.29196	8.31e-16	2.43e-08	3.79e-10
co-occurence of coordinated regulators	Coordinated Regulator	Coordinated Regulator	2020-06-01	ceh-14	M00599_2.00	M00435_2.00	ADA	104	48.1932	2.15798	1.04e-15	5.05e-05	2.53e-08
co-occurence of coordinated regulators	Coordinated Regulator	Coordinated Regulator	ceh-18	lin-31	M00681_2.00	M00665_2.00	ADA	136	74.833	1.81738	3.3e-15	1.32e-10	9.08e-09
co-occurence of coordinated regulators	Coordinated Regulator	Coordinated Regulator	2020-06-01	lin-31	M00599_2.00	M00665_2.00	ADA	105	49.7839	2.10912	3.32e-15	3.76e-05	2.6e-09
co-occurence of coordinated regulators	Coordinated Regulator	Coordinated Regulator	ceh-58	unc-86	M00676_2.00	M02244_2.00	ADA	70	25.8533	2.70759	7.36e-15	0.000261391	4.92e-08
co-occurence of coordinated regulators	Coordinated Regulator	Coordinated Regulator	lin-31	ztf-9	M00665_2.00	M00636_2.00	ADA	95	43.0359	2.20746	8.84e-15	3.75e-09	2.5e-06
co-occurence of coordinated regulators	Coordinated Regulator	Coordinated Regulator	unc-86	vab-7	M02244_2.00	M02186_2.00	ADA	87	37.3236	2.33096	9.05e-15	5.77e-09	3.47e-08
co-occurence of coordinated regulators	Coordinated Regulator	Coordinated Regulator	ceh-58	vab-7	M00676_2.00	M02186_2.00	ADA	94	42.5708	2.20809	1.3e-14	0.000179328	3.1e-10
co-occurence of coordinated regulators	Coordinated Regulator	Coordinated Regulator	unc-62	ceh-14	M02185_2.00	M00435_2.00	ADA	104	50.1833	2.0724	1.59e-14	3.27e-07	4.04e-09
co-occurence of coordinated regulators	Coordinated Regulator	Coordinated Regulator	ceh-38	ztf-3	M03716_2.00	M00640_2.00	ADA	96	44.6009	2.15242	2.87e-14	0.0337711	0.000180251
co-occurence of coordinated regulators	Coordinated Regulator	Coordinated Regulator	ceh-74	ceh-58	M01248_2.00	M00676_2.00	ADA	60	20.3968	2.94163	2.89e-14	2.91e-05	0.00233947
co-occurence of coordinated regulators	Coordinated Regulator	Coordinated Regulator	ceh-74	lin-31	M01248_2.00	M00665_2.00	ADA	84	36.828	2.28087	1.07e-13	0.000382529	1.33e-06
co-occurence of coordinated regulators	Coordinated Regulator	Coordinated Regulator	ceh-74	ceh-14	M01248_2.00	M00435_2.00	ADA	82	35.6512	2.30006	1.52e-13	0.000689222	1.89e-08
co-occurence of coordinated regulators	Coordinated Regulator	Coordinated Regulator	unc-62	lin-31	M02185_2.00	M00665_2.00	ADA	103	51.8397	1.98689	3.54e-13	2.13e-07	1.73e-06
co-occurence of coordinated regulators	Coordinated Regulator	Coordinated Regulator	ceh-74	vab-7	M01248_2.00	M02186_2.00	ADA	72	29.4463	2.44513	4.27e-13	0.000154751	9.74e-10
co-occurence of coordinated regulators	Coordinated Regulator	Coordinated Regulator	unc-86	lin-31	M02244_2.00	M00665_2.00	ADA	96	46.68	2.05656	4.67e-13	5.19e-09	1.16e-08
co-occurence of coordinated regulators	Coordinated Regulator	Coordinated Regulator	unc-86	ceh-14	M02244_2.00	M00435_2.00	ADA	94	45.1884	2.08018	4.77e-13	9.89e-09	3.67e-09
co-occurence of coordinated regulators	Coordinated Regulator	Coordinated Regulator	ceh-58	ceh-14	M00676_2.00	M00435_2.00	ADA	102	51.5413	1.97899	6.39e-13	0.000536784	5.67e-09
co-occurence of coordinated regulators	Coordinated Regulator	Coordinated Regulator	ceh-38	ceh-18	M03716_2.00	M00681_2.00	ADA	111	61.6601	1.80019	1.7e-11	0.0119073	6.18e-09
co-occurence of coordinated regulators	Coordinated Regulator	Coordinated Regulator	ceh-38	unc-62	M03716_2.00	M02185_2.00	ADA	86	42.7143	2.01338	4.3e-11	0.0156212	1.46e-05
co-occurence of coordinated regulators	Coordinated Regulator	Coordinated Regulator	ceh-58	lin-31	M00676_2.00	M00665_2.00	ADA	98	53.2426	1.84063	1.65e-10	0.000101831	5.81e-09
co-occurence of coordinated regulators	Coordinated Regulator	Coordinated Regulator	ceh-14	lin-31	M00435_2.00	M00665_2.00	ADA	144	93.0616	1.54736	1.73e-10	5.54e-09	1.44e-06
co-occurence of coordinated regulators	Coordinated Regulator	Coordinated Regulator	2020-06-01	ceh-38	M00599_2.00	M03716_2.00	ADA	82	41.0204	1.99901	2.14e-10	1.15e-05	0.00388658
co-occurence of coordinated regulators	Coordinated Regulator	Coordinated Regulator	ceh-38	ztf-9	M03716_2.00	M00636_2.00	ADA	73	35.4602	2.05865	8.6e-10	0.0123298	4.25e-05
co-occurence of coordinated regulators	Coordinated Regulator	Coordinated Regulator	vab-7	lin-31	M02186_2.00	M00665_2.00	ADA	123	76.8647	1.60021	1.81e-09	1.03e-09	3.99e-09
co-occurence of coordinated regulators	Coordinated Regulator	Coordinated Regulator	ceh-38	unc-86	M03716_2.00	M02244_2.00	ADA	74	38.4628	1.92394	1.21e-08	0.0303343	8.82e-08
co-occurence of coordinated regulators	Coordinated Regulator	Coordinated Regulator	ceh-38	lin-31	M03716_2.00	M00665_2.00	ADA	121	79.2108	1.52757	5.07e-08	0.0272432	0.00015407
co-occurence of coordinated regulators	Coordinated Regulator	Coordinated Regulator	ceh-38	ceh-58	M03716_2.00	M00676_2.00	ADA	78	43.8702	1.77797	1.27e-07	0.00120515	0.00924345
co-occurence of coordinated regulators	Coordinated Regulator	Coordinated Regulator	ceh-38	ceh-14	M03716_2.00	M00435_2.00	ADA	114	76.6798	1.4867	7.85e-07	0.00712472	1.01e-06
co-occurence of coordinated regulators	Coordinated Regulator	Coordinated Regulator	ceh-38	vab-7	M03716_2.00	M02186_2.00	ADA	97	63.3341	1.53156	2.55e-06	0.00379863	6.56e-09
co-occurence of coordinated regulators	Coordinated Regulator	Coordinated Regulator	ceh-43	ztf-9	M00423_2.00	M00636_2.00	ADE	75	25.0993	2.98814	2.04e-18	1.65e-07	2.73e-06
co-occurence of coordinated regulators	Coordinated Regulator	Coordinated Regulator	ceh-43	ztf-3	M00423_2.00	M00640_2.00	ADE	84	31.5692	2.66082	1.06e-17	4.82e-06	6.78e-07
co-occurence of coordinated regulators	Coordinated Regulator	Coordinated Regulator	unc-62	egl-43	M02185_2.00	M00611_2.00	ADE	63	19.0959	3.29913	2.14e-17	7.88e-06	0.00997862
co-occurence of coordinated regulators	Coordinated Regulator	Coordinated Regulator	ztf-9	egl-43	M00636_2.00	M00611_2.00	ADE	57	15.8529	3.59556	2.29e-17	3e-05	0.0135756
co-occurence of coordinated regulators	Coordinated Regulator	Coordinated Regulator	ztf-3	ztf-9	M00640_2.00	M00636_2.00	ADE	69	23.0781	2.98984	6.96e-17	1.18e-05	0.000663011
co-occurence of coordinated regulators	Coordinated Regulator	Coordinated Regulator	ceh-43	egl-43	M00423_2.00	M00611_2.00	ADE	66	21.6856	3.04349	1.67e-16	1.43e-07	0.01277
co-occurence of coordinated regulators	Coordinated Regulator	Coordinated Regulator	cey-1	ztf-3	M01903_2.00	M00640_2.00	ADE	60	18.5429	3.23574	3.58e-16	0.00257138	0.000320785
co-occurence of coordinated regulators	Coordinated Regulator	Coordinated Regulator	ceh-43	tbx-2	M00423_2.00	M00830_2.00	ADE	80	31.4282	2.54549	1.06e-15	8.31e-07	0.000214078
co-occurence of coordinated regulators	Coordinated Regulator	Coordinated Regulator	ceh-74	egl-43	M01248_2.00	M00611_2.00	ADE	50	13.5661	3.68565	1.12e-15	0.0246733	0.0170483
co-occurence of coordinated regulators	Coordinated Regulator	Coordinated Regulator	unc-62	ztf-9	M02185_2.00	M00636_2.00	ADE	65	22.1019	2.94092	1.55e-15	7.98e-06	8.91e-09
co-occurence of coordinated regulators	Coordinated Regulator	Coordinated Regulator	unc-62	ceh-43	M02185_2.00	M00423_2.00	ADE	77	30.2338	2.54681	4.38e-15	0.00030645	9.56e-09
co-occurence of coordinated regulators	Coordinated Regulator	Coordinated Regulator	ceh-74	ztf-3	M01248_2.00	M00640_2.00	ADE	60	19.7491	3.03811	5.98e-15	0.00291714	0.00230649
co-occurence of coordinated regulators	Coordinated Regulator	Coordinated Regulator	ceh-38	ceh-48	M03716_2.00	M01905_2.00	ADE	119	61.7227	1.92798	6.24e-15	0.00627734	0.000268254
co-occurence of coordinated regulators	Coordinated Regulator	Coordinated Regulator	cey-1	ztf-9	M01903_2.00	M00636_2.00	ADE	51	14.7426	3.45935	6.77e-15	0.000325278	7.81e-07
co-occurence of coordinated regulators	Coordinated Regulator	Coordinated Regulator	tbx-2	ztf-9	M00830_2.00	M00636_2.00	ADE	65	22.975	2.82916	9.61e-15	9.88e-05	3.35e-07
co-occurence of coordinated regulators	Coordinated Regulator	Coordinated Regulator	tbx-2	ztf-3	M00830_2.00	M00640_2.00	ADE	74	28.8974	2.56079	1.38e-14	1.49e-06	1.63e-05
co-occurence of coordinated regulators	Coordinated Regulator	Coordinated Regulator	ceh-74	ztf-9	M01248_2.00	M00636_2.00	ADE	52	15.7016	3.31175	1.97e-14	0.00262574	2.67e-05
co-occurence of coordinated regulators	Coordinated Regulator	Coordinated Regulator	cey-1	egl-43	M01903_2.00	M00611_2.00	ADE	45	12.7375	3.53286	1.61e-13	0.00036623	0.00640243
co-occurence of coordinated regulators	Coordinated Regulator	Coordinated Regulator	cey-1	ceh-43	M01903_2.00	M00423_2.00	ADE	58	20.1669	2.876	1.89e-13	0.000398946	6.12e-08
co-occurence of coordinated regulators	Coordinated Regulator	Coordinated Regulator	ceh-48	ztf-3	M01905_2.00	M00640_2.00	ADE	90	42.1787	2.13378	3.32e-13	0.0111213	3.42e-05
co-occurence of coordinated regulators	Coordinated Regulator	Coordinated Regulator	unc-62	ztf-3	M02185_2.00	M00640_2.00	ADE	69	27.7992	2.48208	6.29e-13	0.00113276	2.04e-06
co-occurence of coordinated regulators	Coordinated Regulator	Coordinated Regulator	tbx-2	egl-43	M00830_2.00	M00611_2.00	ADE	56	19.8503	2.82112	1.17e-12	5.05e-05	0.00610282
co-occurence of coordinated regulators	Coordinated Regulator	Coordinated Regulator	ceh-74	unc-62	M01248_2.00	M02185_2.00	ADE	54	18.9137	2.85507	2.04e-12	0.00543744	0.000251835
co-occurence of coordinated regulators	Coordinated Regulator	Coordinated Regulator	ceh-48	ceh-43	M01905_2.00	M00423_2.00	ADE	93	45.8727	2.02735	2.19e-12	0.00128023	5.71e-05
co-occurence of coordinated regulators	Coordinated Regulator	Coordinated Regulator	cey-1	unc-62	M01903_2.00	M02185_2.00	ADE	52	17.7586	2.92817	2.21e-12	0.000237853	0.000185765
co-occurence of coordinated regulators	Coordinated Regulator	Coordinated Regulator	ceh-74	ceh-43	M01248_2.00	M00423_2.00	ADE	58	21.4787	2.70035	2.52e-12	0.0016223	2.56e-06
co-occurence of coordinated regulators	Coordinated Regulator	Coordinated Regulator	cey-1	ceh-74	M01903_2.00	M01248_2.00	ADE	42	12.616	3.3291	7.64e-12	0.000848913	0.0192878
co-occurence of coordinated regulators	Coordinated Regulator	Coordinated Regulator	ceh-38	ztf-3	M03716_2.00	M00640_2.00	ADE	87	42.4771	2.04816	9.57e-12	0.0234683	8.39e-05
co-occurence of coordinated regulators	Coordinated Regulator	Coordinated Regulator	cey-1	tbx-2	M01903_2.00	M00830_2.00	ADE	51	18.4601	2.76272	3.08e-11	8.42e-05	2.77e-05
co-occurence of coordinated regulators	Coordinated Regulator	Coordinated Regulator	ceh-48	egl-43	M01905_2.00	M00611_2.00	ADE	66	28.9735	2.27794	9.87e-11	0.00165605	0.0239476
co-occurence of coordinated regulators	Coordinated Regulator	Coordinated Regulator	ceh-48	ztf-9	M01905_2.00	M00636_2.00	ADE	72	33.5344	2.14705	1.53e-10	0.0221366	6.54e-05
co-occurence of coordinated regulators	Coordinated Regulator	Coordinated Regulator	ceh-48	ceh-74	M01905_2.00	M01248_2.00	ADE	65	28.6971	2.26504	1.81e-10	0.0186738	0.0195916
co-occurence of coordinated regulators	Coordinated Regulator	Coordinated Regulator	ceh-74	tbx-2	M01248_2.00	M00830_2.00	ADE	51	19.6609	2.59398	2.84e-10	0.00875306	0.000939377
co-occurence of coordinated regulators	Coordinated Regulator	Coordinated Regulator	ceh-38	ceh-43	M03716_2.00	M00423_2.00	ADE	88	46.1971	1.90488	3.25e-10	0.0163694	0.000111471
co-occurence of coordinated regulators	Coordinated Regulator	Coordinated Regulator	unc-62	tbx-2	M02185_2.00	M00830_2.00	ADE	62	27.675	2.24029	8.35e-10	9.39e-05	1.9e-06
co-occurence of coordinated regulators	Coordinated Regulator	Coordinated Regulator	ceh-48	unc-62	M01905_2.00	M02185_2.00	ADE	78	40.3946	1.93095	2.89e-09	0.00371038	0.0226514
co-occurence of coordinated regulators	Coordinated Regulator	Coordinated Regulator	ceh-43	daf-19	M00423_2.00	M00709_2.00	ADE	47	19.0431	2.46809	7.66e-09	0.00189212	0.000658327
co-occurence of coordinated regulators	Coordinated Regulator	Coordinated Regulator	daf-19	ztf-9	M00709_2.00	M00636_2.00	ADE	38	13.9211	2.72967	1.94e-08	0.0021229	0.000429018
co-occurence of coordinated regulators	Coordinated Regulator	Coordinated Regulator	cey-1	daf-19	M01903_2.00	M00709_2.00	ADE	33	11.1854	2.95027	3.03e-08	0.0165864	0.0085503
co-occurence of coordinated regulators	Coordinated Regulator	Coordinated Regulator	ceh-38	egl-43	M03716_2.00	M00611_2.00	ADE	60	29.1785	2.05631	3.95e-08	0.0339849	0.00545549
co-occurence of coordinated regulators	Coordinated Regulator	Coordinated Regulator	daf-19	ztf-3	M00709_2.00	M00640_2.00	ADE	43	17.5096	2.45579	4.24e-08	0.00706748	8.99e-05
co-occurence of coordinated regulators	Coordinated Regulator	Coordinated Regulator	ceh-38	unc-62	M03716_2.00	M02185_2.00	ADE	74	40.6803	1.81906	1.06e-07	0.0200912	0.00799609
co-occurence of coordinated regulators	Coordinated Regulator	Coordinated Regulator	ceh-48	tbx-2	M01905_2.00	M00830_2.00	ADE	75	41.9903	1.78613	1.77e-07	0.0444448	0.000832292
co-occurence of coordinated regulators	Coordinated Regulator	Coordinated Regulator	cey-1	ceh-48	M01903_2.00	M01905_2.00	ADE	55	26.9444	2.04124	2.14e-07	0.000696712	0.0140076
co-occurence of coordinated regulators	Coordinated Regulator	Coordinated Regulator	cey-1	ceh-38	M01903_2.00	M03716_2.00	ADE	54	27.135	1.99005	6.31e-07	0.000252019	0.0287351
co-occurence of coordinated regulators	Coordinated Regulator	Coordinated Regulator	tbx-2	daf-19	M00830_2.00	M00709_2.00	ADE	39	17.4314	2.23734	1.97e-06	0.0029764	0.000150564
co-occurence of coordinated regulators	Coordinated Regulator	Coordinated Regulator	ceh-38	tbx-2	M03716_2.00	M00830_2.00	ADE	71	42.2873	1.67899	4.26e-06	0.0327369	0.000137511
co-occurence of coordinated regulators	Coordinated Regulator	Coordinated Regulator	daf-19	egl-43	M00709_2.00	M00611_2.00	ADE	28	12.0278	2.32795	3.12e-05	0.0010095	0.00213793
co-occurence of coordinated regulators	Coordinated Regulator	Coordinated Regulator	2020-06-01	fos-1	M00599_2.00	M01144_2.00	ADF	204	41.8072	4.87954	3.98e-88	1.41e-08	9.96e-09
co-occurence of coordinated regulators	Coordinated Regulator	Coordinated Regulator	hlh-30	atf-5	M00937_2.00	M00593_2.00	ADF	144	37.0525	3.88638	3.95e-47	0.00169393	0.00162739
co-occurence of coordinated regulators	Coordinated Regulator	Coordinated Regulator	2020-06-01	fkh-8	M00599_2.00	M03026_2.00	ADF	173	53.1843	3.25284	7.94e-47	1.52e-08	4.94e-11
co-occurence of coordinated regulators	Coordinated Regulator	Coordinated Regulator	2020-06-01	ztf-3	M00599_2.00	M00640_2.00	ADF	174	53.907	3.22778	1.14e-46	3.5e-07	2.57e-11
co-occurence of coordinated regulators	Coordinated Regulator	Coordinated Regulator	fos-1	ztf-3	M01144_2.00	M00640_2.00	ADF	158	45.4564	3.47586	6.86e-46	2.52e-07	5.23e-14
co-occurence of coordinated regulators	Coordinated Regulator	Coordinated Regulator	atf-5	ztf-3	M00593_2.00	M00640_2.00	ADF	172	53.453	3.21778	7.17e-46	0.00189824	5.71e-09
co-occurence of coordinated regulators	Coordinated Regulator	Coordinated Regulator	hlh-30	mxl-3	M00937_2.00	M00935_2.00	ADF	125	28.8105	4.33869	1.75e-45	0.00682911	0.014115
co-occurence of coordinated regulators	Coordinated Regulator	Coordinated Regulator	ztf-3	nhr-36	M00640_2.00	M02418_2.00	ADF	174	57.2592	3.03881	4.44e-43	1.79e-08	7.16e-09
co-occurence of coordinated regulators	Coordinated Regulator	Coordinated Regulator	atf-5	nhr-67	M00593_2.00	M02408_2.00	ADF	158	48.2701	3.27325	1.39e-42	0.000135621	7.25e-12
co-occurence of coordinated regulators	Coordinated Regulator	Coordinated Regulator	ceh-58	ceh-19	M00676_2.00	M02180_2.00	ADF	189	67.484	2.80066	2.92e-42	5.06e-07	2.33e-10
co-occurence of coordinated regulators	Coordinated Regulator	Coordinated Regulator	2020-06-01	nhr-36	M00599_2.00	M02418_2.00	ADF	165	52.6625	3.13316	3.05e-42	0.000152232	7.65e-08
co-occurence of coordinated regulators	Coordinated Regulator	Coordinated Regulator	hlh-30	ztf-3	M00937_2.00	M00640_2.00	ADF	143	40.6288	3.51967	1.03e-41	0.00112202	4.78e-07
co-occurence of coordinated regulators	Coordinated Regulator	Coordinated Regulator	2020-06-01	ceh-19	M00599_2.00	M02180_2.00	ADF	181	63.1002	2.86845	1.37e-41	4.6e-07	4.86e-07
co-occurence of coordinated regulators	Coordinated Regulator	Coordinated Regulator	2020-06-01	nhr-67	M00599_2.00	M02408_2.00	ADF	157	48.6801	3.22514	1.75e-41	2.43e-06	3.06e-11
co-occurence of coordinated regulators	Coordinated Regulator	Coordinated Regulator	2020-06-01	atf-5	M00599_2.00	M00593_2.00	ADF	157	49.1618	3.19354	5.91e-41	1.99e-05	0.00150683
co-occurence of coordinated regulators	Coordinated Regulator	Coordinated Regulator	atf-5	fkh-8	M00593_2.00	M03026_2.00	ADF	163	52.7365	3.09084	6.53e-41	0.00229633	1.44e-07
co-occurence of coordinated regulators	Coordinated Regulator	Coordinated Regulator	ztf-3	nhr-67	M00640_2.00	M02408_2.00	ADF	163	52.9292	3.07958	1.04e-40	1.66e-09	1.96e-12
co-occurence of coordinated regulators	Coordinated Regulator	Coordinated Regulator	fkh-8	ztf-3	M03026_2.00	M00640_2.00	ADF	171	57.8267	2.95711	1.16e-40	1.37e-11	9.19e-11
co-occurence of coordinated regulators	Coordinated Regulator	Coordinated Regulator	ceh-58	ceh-23	M00676_2.00	M00671_2.00	ADF	194	72.7306	2.66738	1.69e-40	2.4e-05	1.97e-06
co-occurence of coordinated regulators	Coordinated Regulator	Coordinated Regulator	ceh-58	ztf-3	M00676_2.00	M00640_2.00	ADF	170	57.6521	2.94872	3.15e-40	1.64e-08	4.57e-10
co-occurence of coordinated regulators	Coordinated Regulator	Coordinated Regulator	ceh-23	ztf-3	M00671_2.00	M00640_2.00	ADF	195	73.942	2.6372	4.97e-40	1.36e-06	4.73e-09
co-occurence of coordinated regulators	Coordinated Regulator	Coordinated Regulator	2020-06-01	ceh-58	M00599_2.00	M00676_2.00	ADF	162	53.0238	3.05523	5.4e-40	4.12e-07	3.82e-05
co-occurence of coordinated regulators	Coordinated Regulator	Coordinated Regulator	hlh-30	fos-1	M00937_2.00	M01144_2.00	ADF	123	31.5094	3.90359	5.98e-40	0.000526246	2.07e-06
co-occurence of coordinated regulators	Coordinated Regulator	Coordinated Regulator	hlh-30	2020-06-01	M00937_2.00	M00599_2.00	ADF	134	37.3671	3.58604	9.71e-40	0.000529898	2.87e-05
co-occurence of coordinated regulators	Coordinated Regulator	Coordinated Regulator	2020-06-01	ztf-9	M00599_2.00	M00636_2.00	ADF	144	42.859	3.35985	1.05e-39	5.83e-05	2.47e-07
co-occurence of coordinated regulators	Coordinated Regulator	Coordinated Regulator	2020-06-01	egl-43	M00599_2.00	M00611_2.00	ADF	133	37.0299	3.59169	1.71e-39	1.01e-06	2.45e-05
co-occurence of coordinated regulators	Coordinated Regulator	Coordinated Regulator	ceh-19	ztf-3	M02180_2.00	M00640_2.00	ADF	186	68.6081	2.71105	1.71e-39	5.47e-11	1.32e-10
co-occurence of coordinated regulators	Coordinated Regulator	Coordinated Regulator	fos-1	fkh-8	M01144_2.00	M03026_2.00	ADF	147	44.8471	3.2778	2.29e-39	1.44e-08	2.42e-11
co-occurence of coordinated regulators	Coordinated Regulator	Coordinated Regulator	2020-06-01	ztf-11	M00599_2.00	M00650_2.00	ADF	234	103.647	2.25767	1.54e-38	2.78e-05	8.93e-22
co-occurence of coordinated regulators	Coordinated Regulator	Coordinated Regulator	atf-5	ceh-19	M00593_2.00	M02180_2.00	ADF	175	62.5688	2.79692	1.54e-38	0.000927055	6.34e-09
co-occurence of coordinated regulators	Coordinated Regulator	Coordinated Regulator	ceh-19	fkh-8	M02180_2.00	M03026_2.00	ADF	182	67.6884	2.68879	5.19e-38	1.7e-09	1.38e-08
co-occurence of coordinated regulators	Coordinated Regulator	Coordinated Regulator	fos-1	nhr-67	M01144_2.00	M02408_2.00	ADF	138	41.0489	3.36184	6.28e-38	8.96e-07	4.93e-09
co-occurence of coordinated regulators	Coordinated Regulator	Coordinated Regulator	hlh-30	nhr-67	M00937_2.00	M02408_2.00	ADF	130	36.6894	3.54326	6.45e-38	0.00104073	1.6e-08
co-occurence of coordinated regulators	Coordinated Regulator	Coordinated Regulator	fos-1	egl-43	M01144_2.00	M00611_2.00	ADF	119	31.2251	3.81104	1.49e-37	4.03e-08	2.34e-06
co-occurence of coordinated regulators	Coordinated Regulator	Coordinated Regulator	ztf-3	egl-43	M00640_2.00	M00611_2.00	ADF	136	40.2622	3.37786	1.49e-37	2.29e-09	6.77e-06
co-occurence of coordinated regulators	Coordinated Regulator	Coordinated Regulator	fos-1	atf-5	M01144_2.00	M00593_2.00	ADF	138	41.4551	3.3289	1.84e-37	1.68e-06	0.00232641
co-occurence of coordinated regulators	Coordinated Regulator	Coordinated Regulator	ceh-58	fkh-8	M00676_2.00	M03026_2.00	ADF	164	56.8793	2.8833	2.13e-37	6.65e-07	3.12e-09
co-occurence of coordinated regulators	Coordinated Regulator	Coordinated Regulator	2020-06-01	ceh-23	M00599_2.00	M00671_2.00	ADF	181	68.0059	2.66153	3.56e-37	2.57e-07	3.3e-05
co-occurence of coordinated regulators	Coordinated Regulator	Coordinated Regulator	2020-06-01	ceh-74	M00599_2.00	M01248_2.00	ADF	128	36.6766	3.48996	1.29e-36	9.07e-08	0.000373936
co-occurence of coordinated regulators	Coordinated Regulator	Coordinated Regulator	hlh-30	fkh-8	M00937_2.00	M03026_2.00	ADF	134	40.0842	3.34296	1.77e-36	4.63e-05	2.34e-08
co-occurence of coordinated regulators	Coordinated Regulator	Coordinated Regulator	ceh-9	fkh-8	M03847_2.00	M03026_2.00	ADF	176	65.5524	2.68488	1.81e-36	0.000230116	2.67e-10
co-occurence of coordinated regulators	Coordinated Regulator	Coordinated Regulator	hlh-30	ceh-19	M00937_2.00	M02180_2.00	ADF	147	47.5576	3.09099	1.9e-36	0.000435748	1.41e-07
co-occurence of coordinated regulators	Coordinated Regulator	Coordinated Regulator	atf-5	ztf-9	M00593_2.00	M00636_2.00	ADF	138	42.4981	3.24721	2.72e-36	9.88e-05	4.37e-07
co-occurence of coordinated regulators	Coordinated Regulator	Coordinated Regulator	ceh-9	ztf-3	M03847_2.00	M00640_2.00	ADF	177	66.4431	2.66394	2.89e-36	2.56e-07	4.23e-10
co-occurence of coordinated regulators	Coordinated Regulator	Coordinated Regulator	atf-5	ceh-58	M00593_2.00	M00676_2.00	ADF	155	52.5772	2.94804	3.23e-36	0.000626042	9.01e-06
co-occurence of coordinated regulators	Coordinated Regulator	Coordinated Regulator	fos-1	ceh-19	M01144_2.00	M02180_2.00	ADF	156	53.2085	2.93186	3.38e-36	3.51e-07	5.33e-09
co-occurence of coordinated regulators	Coordinated Regulator	Coordinated Regulator	ztf-3	ztf-11	M00640_2.00	M00650_2.00	ADF	241	112.694	2.13854	4.46e-36	1.15e-07	4.26e-31
co-occurence of coordinated regulators	Coordinated Regulator	Coordinated Regulator	atf-5	ceh-23	M00593_2.00	M00671_2.00	ADF	178	67.4333	2.63965	5.51e-36	0.00439282	6.7e-07
co-occurence of coordinated regulators	Coordinated Regulator	Coordinated Regulator	mxl-3	atf-5	M00935_2.00	M00593_2.00	ADF	129	37.9043	3.4033	8.39e-36	0.000728377	2.21e-05
co-occurence of coordinated regulators	Coordinated Regulator	Coordinated Regulator	ztf-3	ztf-9	M00640_2.00	M00636_2.00	ADF	144	46.6001	3.09013	1.29e-35	8.81e-09	1.78e-06
co-occurence of coordinated regulators	Coordinated Regulator	Coordinated Regulator	fos-1	nhr-36	M01144_2.00	M02418_2.00	ADF	140	44.407	3.15265	1.81e-35	1.65e-06	6.31e-09
co-occurence of coordinated regulators	Coordinated Regulator	Coordinated Regulator	ceh-74	ztf-3	M01248_2.00	M00640_2.00	ADF	132	39.8781	3.31009	1.91e-35	7.01e-05	6.07e-09
co-occurence of coordinated regulators	Coordinated Regulator	Coordinated Regulator	atf-5	nhr-36	M00593_2.00	M02418_2.00	ADF	153	52.219	2.92997	2.19e-35	0.00442671	1.07e-08
co-occurence of coordinated regulators	Coordinated Regulator	Coordinated Regulator	hlh-30	ceh-58	M00937_2.00	M00676_2.00	ADF	132	39.9632	3.30304	2.39e-35	0.000374655	9.04e-06
co-occurence of coordinated regulators	Coordinated Regulator	Coordinated Regulator	hlh-30	ceh-23	M00937_2.00	M00671_2.00	ADF	151	51.255	2.94605	3.83e-35	0.000378211	1.45e-05
co-occurence of coordinated regulators	Coordinated Regulator	Coordinated Regulator	ceh-23	egl-43	M00671_2.00	M00611_2.00	ADF	150	50.7925	2.95319	5.28e-35	0.000106908	0.00920835
co-occurence of coordinated regulators	Coordinated Regulator	Coordinated Regulator	fkh-8	nhr-36	M03026_2.00	M02418_2.00	ADF	159	56.4917	2.81457	7.32e-35	4.31e-07	2.93e-07
co-occurence of coordinated regulators	Coordinated Regulator	Coordinated Regulator	2020-06-01	ceh-9	M00599_2.00	M03847_2.00	ADF	166	61.109	2.71646	1.04e-34	1.78e-07	0.00018781
co-occurence of coordinated regulators	Coordinated Regulator	Coordinated Regulator	ceh-57	ztf-3	M00675_2.00	M00640_2.00	ADF	136	42.8287	3.17544	1.07e-34	0.000406429	3.52e-09
co-occurence of coordinated regulators	Coordinated Regulator	Coordinated Regulator	ceh-74	egl-43	M01248_2.00	M00611_2.00	ADF	107	27.3931	3.90609	1.57e-34	0.00163208	2.64e-05
co-occurence of coordinated regulators	Coordinated Regulator	Coordinated Regulator	ceh-58	egl-43	M00676_2.00	M00611_2.00	ADF	130	39.6025	3.28262	1.69e-34	0.000154217	0.00208529
co-occurence of coordinated regulators	Coordinated Regulator	Coordinated Regulator	hlh-30	nhr-36	M00937_2.00	M02418_2.00	ADF	130	39.6909	3.27531	2.12e-34	0.000303622	1.16e-08
co-occurence of coordinated regulators	Coordinated Regulator	Coordinated Regulator	hlh-30	ceh-9	M00937_2.00	M03847_2.00	ADF	141	46.0569	3.06143	2.29e-34	0.00496322	3.86e-05
co-occurence of coordinated regulators	Coordinated Regulator	Coordinated Regulator	fos-1	ceh-74	M01144_2.00	M01248_2.00	ADF	113	30.9272	3.65375	6.96e-34	2.88e-08	0.000170397
co-occurence of coordinated regulators	Coordinated Regulator	Coordinated Regulator	atf-5	ceh-74	M00593_2.00	M01248_2.00	ADF	123	36.3678	3.38211	9.16e-34	2.81e-05	1.05e-05
co-occurence of coordinated regulators	Coordinated Regulator	Coordinated Regulator	fkh-8	egl-43	M03026_2.00	M00611_2.00	ADF	129	39.7225	3.24753	9.56e-34	6.79e-07	8.59e-05
co-occurence of coordinated regulators	Coordinated Regulator	Coordinated Regulator	ceh-23	ceh-19	M00671_2.00	M02180_2.00	ADF	201	86.552	2.3223	1.67e-33	1.32e-05	2.38e-10
co-occurence of coordinated regulators	Coordinated Regulator	Coordinated Regulator	2020-06-01	ztf-14	M00599_2.00	M00628_2.00	ADF	124	37.1825	3.3349	1.84e-33	4.54e-06	0.000251541
co-occurence of coordinated regulators	Coordinated Regulator	Coordinated Regulator	fos-1	ztf-9	M01144_2.00	M00636_2.00	ADF	122	36.1404	3.37573	2.15e-33	1.42e-06	8.91e-09
co-occurence of coordinated regulators	Coordinated Regulator	Coordinated Regulator	fos-1	ceh-58	M01144_2.00	M00676_2.00	ADF	137	44.7117	3.06408	2.42e-33	4.05e-08	1.97e-06
co-occurence of coordinated regulators	Coordinated Regulator	Coordinated Regulator	egl-43	nhr-67	M00611_2.00	M02408_2.00	ADF	122	36.3583	3.35549	3.82e-33	5.88e-07	1.01e-14
co-occurence of coordinated regulators	Coordinated Regulator	Coordinated Regulator	fkh-8	nhr-67	M03026_2.00	M02408_2.00	ADF	149	52.2197	2.85333	4.47e-33	1.41e-10	1.42e-14
co-occurence of coordinated regulators	Coordinated Regulator	Coordinated Regulator	hlh-30	ztf-9	M00937_2.00	M00636_2.00	ADF	114	32.3022	3.52918	8.02e-33	2.03e-05	1.51e-05
co-occurence of coordinated regulators	Coordinated Regulator	Coordinated Regulator	ceh-58	ztf-9	M00676_2.00	M00636_2.00	ADF	138	45.8366	3.0107	8.3e-33	4.74e-06	1.64e-06
co-occurence of coordinated regulators	Coordinated Regulator	Coordinated Regulator	ceh-74	nhr-36	M01248_2.00	M02418_2.00	ADF	126	38.9574	3.2343	9.87e-33	0.00814455	8.29e-08
co-occurence of coordinated regulators	Coordinated Regulator	Coordinated Regulator	ceh-58	nhr-67	M00676_2.00	M02408_2.00	ADF	148	52.062	2.84276	1.18e-32	5.84e-07	3.06e-10
co-occurence of coordinated regulators	Coordinated Regulator	Coordinated Regulator	ztf-9	egl-43	M00636_2.00	M00611_2.00	ADF	113	32.0106	3.53008	1.57e-32	1.21e-05	0.000701008
co-occurence of coordinated regulators	Coordinated Regulator	Coordinated Regulator	2020-06-01	dmd-6	M00599_2.00	M00655_2.00	ADF	237	115.417	2.05342	1.91e-32	3e-05	9.42e-21
co-occurence of coordinated regulators	Coordinated Regulator	Coordinated Regulator	atf-5	ceh-9	M00593_2.00	M03847_2.00	ADF	161	60.5944	2.65701	2.14e-32	0.00105851	5.93e-05
co-occurence of coordinated regulators	Coordinated Regulator	Coordinated Regulator	ceh-74	nhr-67	M01248_2.00	M02408_2.00	ADF	120	36.0114	3.33228	2.76e-32	2.66e-05	3.43e-10
co-occurence of coordinated regulators	Coordinated Regulator	Coordinated Regulator	hlh-30	ceh-74	M00937_2.00	M01248_2.00	ADF	104	27.6426	3.76231	3.8e-32	0.00010648	0.000423822
co-occurence of coordinated regulators	Coordinated Regulator	Coordinated Regulator	atf-5	ztf-11	M00593_2.00	M00650_2.00	ADF	220	102.774	2.14062	4.28e-32	0.00693911	6.58e-24
co-occurence of coordinated regulators	Coordinated Regulator	Coordinated Regulator	ceh-19	nhr-36	M02180_2.00	M02418_2.00	ADF	170	67.0242	2.5364	5.38e-32	1.17e-06	6.68e-08
co-occurence of coordinated regulators	Coordinated Regulator	Coordinated Regulator	fos-1	ztf-11	M01144_2.00	M00650_2.00	ADF	199	87.399	2.27691	6.45e-32	1.2e-07	7.33e-21
co-occurence of coordinated regulators	Coordinated Regulator	Coordinated Regulator	ceh-9	egl-43	M03847_2.00	M00611_2.00	ADF	136	45.6412	2.97976	7.83e-32	1.46e-05	1.81e-05
co-occurence of coordinated regulators	Coordinated Regulator	Coordinated Regulator	ceh-19	nhr-67	M02180_2.00	M02408_2.00	ADF	162	61.9557	2.61477	8.26e-32	3.34e-07	4.49e-10
co-occurence of coordinated regulators	Coordinated Regulator	Coordinated Regulator	hlh-30	egl-43	M00937_2.00	M00611_2.00	ADF	104	27.9089	3.72641	8.52e-32	0.00125919	1.22e-05
co-occurence of coordinated regulators	Coordinated Regulator	Coordinated Regulator	egl-43	nhr-36	M00611_2.00	M02418_2.00	ADF	125	39.3327	3.17802	1.01e-31	7.53e-05	4.67e-06
co-occurence of coordinated regulators	Coordinated Regulator	Coordinated Regulator	fkh-8	ztf-11	M03026_2.00	M00650_2.00	ADF	230	111.183	2.06866	1.11e-31	9.35e-08	7.29e-25
co-occurence of coordinated regulators	Coordinated Regulator	Coordinated Regulator	ceh-58	nhr-36	M00676_2.00	M02418_2.00	ADF	153	56.3211	2.71657	1.17e-31	5.89e-06	2.12e-07
co-occurence of coordinated regulators	Coordinated Regulator	Coordinated Regulator	ceh-19	ceh-9	M02180_2.00	M03847_2.00	ADF	185	77.7742	2.37868	1.18e-31	6.09e-09	9.24e-05
co-occurence of coordinated regulators	Coordinated Regulator	Coordinated Regulator	ceh-23	fkh-8	M00671_2.00	M03026_2.00	ADF	178	72.9508	2.44	1.27e-31	2.58e-06	1.16e-09
co-occurence of coordinated regulators	Coordinated Regulator	Coordinated Regulator	fkh-8	ztf-9	M03026_2.00	M00636_2.00	ADF	136	45.9754	2.9581	1.65e-31	1.1e-06	8.6e-06
co-occurence of coordinated regulators	Coordinated Regulator	Coordinated Regulator	hlh-30	ztf-11	M00937_2.00	M00650_2.00	ADF	185	78.117	2.36824	2.08e-31	0.00440155	1.51e-18
co-occurence of coordinated regulators	Coordinated Regulator	Coordinated Regulator	fos-1	ceh-23	M01144_2.00	M00671_2.00	ADF	154	57.3453	2.68549	2.49e-31	1.45e-08	2.23e-05
co-occurence of coordinated regulators	Coordinated Regulator	Coordinated Regulator	nhr-67	nhr-36	M02408_2.00	M02418_2.00	ADF	145	51.7073	2.80425	2.73e-31	2.45e-10	1.54e-09
co-occurence of coordinated regulators	Coordinated Regulator	Coordinated Regulator	ceh-74	ceh-58	M01248_2.00	M00676_2.00	ADF	124	39.2247	3.16127	3.11e-31	0.00461023	1.08e-06
co-occurence of coordinated regulators	Coordinated Regulator	Coordinated Regulator	ztf-3	ztf-14	M00640_2.00	M00628_2.00	ADF	126	40.428	3.11665	3.55e-31	6.49e-12	0.000179373
co-occurence of coordinated regulators	Coordinated Regulator	Coordinated Regulator	ceh-23	nhr-67	M00671_2.00	M02408_2.00	ADF	168	66.7725	2.51601	3.82e-31	3.63e-07	2.24e-09
co-occurence of coordinated regulators	Coordinated Regulator	Coordinated Regulator	ceh-74	fkh-8	M01248_2.00	M03026_2.00	ADF	124	39.3435	3.15173	4.14e-31	4.67e-05	7.58e-10
co-occurence of coordinated regulators	Coordinated Regulator	Coordinated Regulator	ceh-19	ztf-9	M02180_2.00	M00636_2.00	ADF	149	54.5472	2.73158	5.34e-31	2.4e-08	2.14e-06
co-occurence of coordinated regulators	Coordinated Regulator	Coordinated Regulator	ceh-19	egl-43	M02180_2.00	M00611_2.00	ADF	137	47.1284	2.90695	5.5e-31	1.27e-06	0.000362615
co-occurence of coordinated regulators	Coordinated Regulator	Coordinated Regulator	fos-1	ceh-9	M01144_2.00	M03847_2.00	ADF	144	51.5295	2.79452	6.81e-31	5.45e-07	8.25e-05
co-occurence of coordinated regulators	Coordinated Regulator	Coordinated Regulator	ztf-3	dmd-6	M00640_2.00	M00655_2.00	ADF	246	125.492	1.96029	8.38e-31	1e-07	1.53e-22
co-occurence of coordinated regulators	Coordinated Regulator	Coordinated Regulator	fos-1	ztf-14	M01144_2.00	M00628_2.00	ADF	109	31.3537	3.47646	9.27e-31	5.24e-05	9.62e-05
co-occurence of coordinated regulators	Coordinated Regulator	Coordinated Regulator	mxl-3	ztf-3	M00935_2.00	M00640_2.00	ADF	127	41.5629	3.05561	1.29e-30	3.36e-05	1.03e-07
co-occurence of coordinated regulators	Coordinated Regulator	Coordinated Regulator	ztf-9	nhr-36	M00636_2.00	M02418_2.00	ADF	133	45.5242	2.92152	3.19e-30	2.22e-05	2.68e-07
co-occurence of coordinated regulators	Coordinated Regulator	Coordinated Regulator	atf-5	ztf-14	M00593_2.00	M00628_2.00	ADF	118	36.8694	3.20049	4.03e-30	3.94e-06	2.39e-05
co-occurence of coordinated regulators	Coordinated Regulator	Coordinated Regulator	ceh-58	ceh-9	M00676_2.00	M03847_2.00	ADF	163	65.3545	2.49409	1.18e-29	3.09e-08	5.21e-06
co-occurence of coordinated regulators	Coordinated Regulator	Coordinated Regulator	ceh-23	nhr-36	M00671_2.00	M02418_2.00	ADF	173	72.235	2.39496	1.29e-29	0.000212148	2.77e-07
co-occurence of coordinated regulators	Coordinated Regulator	Coordinated Regulator	egl-43	ztf-11	M00611_2.00	M00650_2.00	ADF	180	77.412	2.32522	2.01e-29	0.00254019	1.09e-20
co-occurence of coordinated regulators	Coordinated Regulator	Coordinated Regulator	mxl-3	2020-06-01	M00935_2.00	M00599_2.00	ADF	119	38.2262	3.11304	2.68e-29	2.74e-05	1.63e-06
co-occurence of coordinated regulators	Coordinated Regulator	Coordinated Regulator	fos-1	ceh-57	M01144_2.00	M00675_2.00	ADF	110	33.2156	3.3117	3.06e-29	5.59e-05	0.00312521
co-occurence of coordinated regulators	Coordinated Regulator	Coordinated Regulator	ceh-19	ztf-11	M02180_2.00	M00650_2.00	ADF	250	131.913	1.89519	4.18e-29	3.5e-06	3.75e-25
co-occurence of coordinated regulators	Coordinated Regulator	Coordinated Regulator	ztf-11	nhr-36	M00650_2.00	M02418_2.00	ADF	223	110.092	2.02557	4.27e-29	2.23e-21	6.43e-07
co-occurence of coordinated regulators	Coordinated Regulator	Coordinated Regulator	mxl-3	nhr-67	M00935_2.00	M02408_2.00	ADF	117	37.5329	3.11726	7.86e-29	5.89e-05	9.18e-09
co-occurence of coordinated regulators	Coordinated Regulator	Coordinated Regulator	ceh-74	ztf-9	M01248_2.00	M00636_2.00	ADF	106	31.7052	3.34329	1.78e-28	0.000537924	2.97e-09
co-occurence of coordinated regulators	Coordinated Regulator	Coordinated Regulator	ztf-9	nhr-67	M00636_2.00	M02408_2.00	ADF	124	42.0816	2.94665	2.23e-28	1.73e-07	7.2e-12
co-occurence of coordinated regulators	Coordinated Regulator	Coordinated Regulator	egl-43	ztf-14	M00611_2.00	M00628_2.00	ADF	98	27.7709	3.52887	4.58e-28	0.000378029	0.040079
co-occurence of coordinated regulators	Coordinated Regulator	Coordinated Regulator	atf-5	dmd-6	M00593_2.00	M00655_2.00	ADF	226	114.445	1.97474	5.56e-28	0.0308622	2.06e-20
co-occurence of coordinated regulators	Coordinated Regulator	Coordinated Regulator	hlh-30	dmd-6	M00937_2.00	M00655_2.00	ADF	190	86.9883	2.1842	7.16e-28	0.0116411	1.21e-21
co-occurence of coordinated regulators	Coordinated Regulator	Coordinated Regulator	ceh-74	ztf-14	M01248_2.00	M00628_2.00	ADF	97	27.506	3.5265	9.45e-28	0.000217023	3.33e-05
co-occurence of coordinated regulators	Coordinated Regulator	Coordinated Regulator	2020-06-01	ceh-57	M00599_2.00	M00675_2.00	ADF	118	39.3905	2.99565	1.47e-27	1.17e-06	0.000829098
co-occurence of coordinated regulators	Coordinated Regulator	Coordinated Regulator	ceh-23	ceh-9	M00671_2.00	M03847_2.00	ADF	185	83.8208	2.20709	1.48e-27	3.87e-05	2.91e-05
co-occurence of coordinated regulators	Coordinated Regulator	Coordinated Regulator	ceh-74	ceh-19	M01248_2.00	M02180_2.00	ADF	130	46.6788	2.78499	1.66e-27	0.00220798	1.56e-09
co-occurence of coordinated regulators	Coordinated Regulator	Coordinated Regulator	mxl-3	fos-1	M00935_2.00	M01144_2.00	ADF	105	32.2339	3.25744	2.76e-27	5.84e-06	3.43e-05
co-occurence of coordinated regulators	Coordinated Regulator	Coordinated Regulator	ceh-57	ceh-19	M00675_2.00	M02180_2.00	ADF	135	50.1327	2.69285	3.18e-27	0.00112864	7.52e-10
co-occurence of coordinated regulators	Coordinated Regulator	Coordinated Regulator	ceh-74	ceh-23	M01248_2.00	M00671_2.00	ADF	135	50.3079	2.68348	4.45e-27	0.00055968	3.22e-05
co-occurence of coordinated regulators	Coordinated Regulator	Coordinated Regulator	fos-1	dmd-6	M01144_2.00	M00655_2.00	ADF	202	97.3244	2.07553	4.59e-27	2.04e-07	3.25e-22
co-occurence of coordinated regulators	Coordinated Regulator	Coordinated Regulator	ceh-23	ztf-9	M00671_2.00	M00636_2.00	ADF	148	58.788	2.51752	4.96e-27	5.67e-05	1.48e-05
co-occurence of coordinated regulators	Coordinated Regulator	Coordinated Regulator	ceh-9	nhr-36	M03847_2.00	M02418_2.00	ADF	157	64.9091	2.41877	5.65e-27	5.98e-05	3.39e-06
co-occurence of coordinated regulators	Coordinated Regulator	Coordinated Regulator	ztf-11	dmd-6	M00650_2.00	M00655_2.00	ADF	362	241.283	1.50031	9.69e-27	7.12e-21	4.13e-17
co-occurence of coordinated regulators	Coordinated Regulator	Coordinated Regulator	ztf-11	nhr-67	M00650_2.00	M02408_2.00	ADF	207	101.767	2.03406	1.02e-26	3.43e-20	8.31e-09
co-occurence of coordinated regulators	Coordinated Regulator	Coordinated Regulator	ceh-9	nhr-67	M03847_2.00	M02408_2.00	ADF	149	60.0006	2.48331	1.29e-26	8.07e-06	3.87e-11
co-occurence of coordinated regulators	Coordinated Regulator	Coordinated Regulator	ceh-9	ztf-9	M03847_2.00	M00636_2.00	ADF	137	52.8259	2.59343	4.52e-26	0.000480627	1.26e-07
co-occurence of coordinated regulators	Coordinated Regulator	Coordinated Regulator	ceh-23	ztf-11	M00671_2.00	M00650_2.00	ADF	255	142.168	1.79365	4.61e-26	0.000957663	5.71e-27
co-occurence of coordinated regulators	Coordinated Regulator	Coordinated Regulator	fkh-8	dmd-6	M03026_2.00	M00655_2.00	ADF	233	123.81	1.88192	5.08e-26	3.12e-07	2.73e-21
co-occurence of coordinated regulators	Coordinated Regulator	Coordinated Regulator	fkh-8	ztf-14	M03026_2.00	M00628_2.00	ADF	116	39.8861	2.90828	5.77e-26	2.2e-07	0.00012127
co-occurence of coordinated regulators	Coordinated Regulator	Coordinated Regulator	hlh-30	ztf-14	M00937_2.00	M00628_2.00	ADF	95	28.0238	3.38997	6.76e-26	0.000749022	0.00139831
co-occurence of coordinated regulators	Coordinated Regulator	Coordinated Regulator	ceh-57	nhr-36	M00675_2.00	M02418_2.00	ADF	119	41.84	2.84417	7.91e-26	0.00034112	2.36e-08
co-occurence of coordinated regulators	Coordinated Regulator	Coordinated Regulator	dmd-6	nhr-36	M00655_2.00	M02418_2.00	ADF	231	122.595	1.88426	8.36e-26	1.29e-21	6.44e-06
co-occurence of coordinated regulators	Coordinated Regulator	Coordinated Regulator	ztf-14	nhr-67	M00628_2.00	M02408_2.00	ADF	109	36.5081	2.98564	3e-25	0.000861231	5.7e-09
co-occurence of coordinated regulators	Coordinated Regulator	Coordinated Regulator	egl-43	dmd-6	M00611_2.00	M00655_2.00	ADF	183	86.2033	2.12289	3.58e-25	0.00142052	2.47e-19
co-occurence of coordinated regulators	Coordinated Regulator	Coordinated Regulator	mxl-3	ceh-19	M00935_2.00	M02180_2.00	ADF	128	48.651	2.63098	8.58e-25	0.000104517	1.5e-06
co-occurence of coordinated regulators	Coordinated Regulator	Coordinated Regulator	ceh-74	ceh-9	M01248_2.00	M03847_2.00	ADF	122	45.2058	2.69877	1.64e-24	0.00038204	2.5e-06
co-occurence of coordinated regulators	Coordinated Regulator	Coordinated Regulator	ceh-9	ztf-11	M03847_2.00	M00650_2.00	ADF	234	127.75	1.8317	1.81e-24	0.00134246	1.17e-27
co-occurence of coordinated regulators	Coordinated Regulator	Coordinated Regulator	ztf-9	ztf-11	M00636_2.00	M00650_2.00	ADF	185	89.5979	2.06478	4.56e-24	5.96e-05	2.14e-20
co-occurence of coordinated regulators	Coordinated Regulator	Coordinated Regulator	ceh-58	ztf-11	M00676_2.00	M00650_2.00	ADF	212	110.848	1.91254	6.11e-24	3.09e-06	2.1e-22
co-occurence of coordinated regulators	Coordinated Regulator	Coordinated Regulator	ztf-9	ztf-14	M00636_2.00	M00628_2.00	ADF	99	32.1425	3.08003	7.25e-24	6.68e-06	0.000262332
co-occurence of coordinated regulators	Coordinated Regulator	Coordinated Regulator	ceh-74	ceh-57	M01248_2.00	M00675_2.00	ADF	93	29.1394	3.19156	1.77e-23	1.58e-05	0.000415041
co-occurence of coordinated regulators	Coordinated Regulator	Coordinated Regulator	ceh-58	ceh-57	M00676_2.00	M00675_2.00	ADF	115	42.1271	2.72984	1.91e-23	6.05e-07	0.000320797
co-occurence of coordinated regulators	Coordinated Regulator	Coordinated Regulator	ceh-19	dmd-6	M02180_2.00	M00655_2.00	ADF	253	146.893	1.72234	4.39e-23	2.18e-06	3.02e-24
co-occurence of coordinated regulators	Coordinated Regulator	Coordinated Regulator	hlh-30	ceh-57	M00937_2.00	M00675_2.00	ADF	93	29.688	3.13258	6.52e-23	0.0310029	0.0134064
co-occurence of coordinated regulators	Coordinated Regulator	Coordinated Regulator	ceh-58	ztf-14	M00676_2.00	M00628_2.00	ADF	110	39.7657	2.7662	7.76e-23	2.86e-07	0.00240277
co-occurence of coordinated regulators	Coordinated Regulator	Coordinated Regulator	mxl-3	ceh-57	M00935_2.00	M00675_2.00	ADF	94	30.3705	3.09511	8.57e-23	0.000491104	0.00104926
co-occurence of coordinated regulators	Coordinated Regulator	Coordinated Regulator	ztf-14	nhr-36	M00628_2.00	M02418_2.00	ADF	109	39.4947	2.75986	1.52e-22	8.96e-05	3.64e-07
co-occurence of coordinated regulators	Coordinated Regulator	Coordinated Regulator	mxl-3	ceh-58	M00935_2.00	M00676_2.00	ADF	111	40.882	2.71513	2.06e-22	0.000101112	9.25e-07
co-occurence of coordinated regulators	Coordinated Regulator	Coordinated Regulator	mxl-3	ceh-23	M00935_2.00	M00671_2.00	ADF	129	52.4334	2.46026	2.12e-22	2.17e-05	7.72e-05
co-occurence of coordinated regulators	Coordinated Regulator	Coordinated Regulator	ceh-19	ztf-14	M02180_2.00	M00628_2.00	ADF	121	47.3226	2.55692	2.58e-22	2.71e-09	0.000620585
co-occurence of coordinated regulators	Coordinated Regulator	Coordinated Regulator	dmd-6	nhr-67	M00655_2.00	M02408_2.00	ADF	211	113.324	1.86192	2.66e-22	3.51e-21	6.5e-09
co-occurence of coordinated regulators	Coordinated Regulator	Coordinated Regulator	mxl-3	nhr-36	M00935_2.00	M02418_2.00	ADF	110	40.6034	2.70913	3.95e-22	3.75e-05	1e-08
co-occurence of coordinated regulators	Coordinated Regulator	Coordinated Regulator	ceh-74	ztf-11	M01248_2.00	M00650_2.00	ADF	163	76.6735	2.1259	4.44e-22	0.00198141	3.06e-17
co-occurence of coordinated regulators	Coordinated Regulator	Coordinated Regulator	ceh-57	egl-43	M00675_2.00	M00611_2.00	ADF	91	29.42	3.09313	4.82e-22	5.98e-05	4.17e-05
co-occurence of coordinated regulators	Coordinated Regulator	Coordinated Regulator	ceh-57	fkh-8	M00675_2.00	M03026_2.00	ADF	112	42.2546	2.6506	8.46e-22	0.000218956	4.71e-07
co-occurence of coordinated regulators	Coordinated Regulator	Coordinated Regulator	mxl-3	egl-43	M00935_2.00	M00611_2.00	ADF	89	28.5505	3.11728	8.79e-22	8.14e-06	4.66e-05
co-occurence of coordinated regulators	Coordinated Regulator	Coordinated Regulator	ceh-23	ceh-57	M00671_2.00	M00675_2.00	ADF	130	54.0303	2.40606	9.76e-22	2.36e-05	0.00151919
co-occurence of coordinated regulators	Coordinated Regulator	Coordinated Regulator	ceh-57	nhr-67	M00675_2.00	M02408_2.00	ADF	106	38.676	2.74072	1.11e-21	0.000334354	7.26e-09
co-occurence of coordinated regulators	Coordinated Regulator	Coordinated Regulator	mxl-3	ceh-9	M00935_2.00	M03847_2.00	ADF	119	47.1158	2.52569	1.72e-21	1.62e-05	9.28e-06
co-occurence of coordinated regulators	Coordinated Regulator	Coordinated Regulator	mxl-3	ceh-74	M00935_2.00	M01248_2.00	ADF	88	28.2781	3.11194	1.73e-21	7.66e-06	7.34e-06
co-occurence of coordinated regulators	Coordinated Regulator	Coordinated Regulator	ceh-58	dmd-6	M00676_2.00	M00655_2.00	ADF	221	123.436	1.7904	2.11e-21	6.7e-05	4.44e-19
co-occurence of coordinated regulators	Coordinated Regulator	Coordinated Regulator	mxl-3	fkh-8	M00935_2.00	M03026_2.00	ADF	109	41.0058	2.65816	2.73e-21	5.88e-07	6.28e-08
co-occurence of coordinated regulators	Coordinated Regulator	Coordinated Regulator	mxl-3	ztf-14	M00935_2.00	M00628_2.00	ADF	87	28.6681	3.03473	1.53e-20	1.16e-06	0.00191374
co-occurence of coordinated regulators	Coordinated Regulator	Coordinated Regulator	ceh-23	dmd-6	M00671_2.00	M00655_2.00	ADF	259	158.313	1.636	1.72e-20	0.00088937	4.45e-19
co-occurence of coordinated regulators	Coordinated Regulator	Coordinated Regulator	ceh-57	ceh-9	M00675_2.00	M03847_2.00	ADF	119	48.5507	2.45104	1.93e-20	0.00231332	1.8e-05
co-occurence of coordinated regulators	Coordinated Regulator	Coordinated Regulator	ceh-57	ztf-9	M00675_2.00	M00636_2.00	ADF	96	34.0512	2.81928	1.93e-20	0.000429854	6.19e-06
co-occurence of coordinated regulators	Coordinated Regulator	Coordinated Regulator	mxl-3	ztf-9	M00935_2.00	M00636_2.00	ADF	94	33.0448	2.84462	2.83e-20	4.27e-05	1.14e-06
co-occurence of coordinated regulators	Coordinated Regulator	Coordinated Regulator	ceh-57	ztf-11	M00675_2.00	M00650_2.00	ADF	165	82.3468	2.00372	9.55e-20	0.0121137	1.93e-18
co-occurence of coordinated regulators	Coordinated Regulator	Coordinated Regulator	ceh-74	dmd-6	M01248_2.00	M00655_2.00	ADF	168	85.3808	1.96765	2.36e-19	0.00614418	8.63e-22
co-occurence of coordinated regulators	Coordinated Regulator	Coordinated Regulator	ceh-57	ztf-14	M00675_2.00	M00628_2.00	ADF	86	29.5412	2.91118	3.54e-19	7.43e-06	0.00176325
co-occurence of coordinated regulators	Coordinated Regulator	Coordinated Regulator	ztf-9	dmd-6	M00636_2.00	M00655_2.00	ADF	186	99.773	1.86423	3.54e-19	6.2e-05	7.26e-20
co-occurence of coordinated regulators	Coordinated Regulator	Coordinated Regulator	ceh-9	dmd-6	M03847_2.00	M00655_2.00	ADF	237	142.258	1.66599	3.69e-19	0.000307569	3.36e-23
co-occurence of coordinated regulators	Coordinated Regulator	Coordinated Regulator	ceh-9	ztf-14	M03847_2.00	M00628_2.00	ADF	112	45.8293	2.44385	4.23e-19	0.000219892	0.000499418
co-occurence of coordinated regulators	Coordinated Regulator	Coordinated Regulator	mxl-3	ztf-11	M00935_2.00	M00650_2.00	ADF	160	79.913	2.00218	4.87e-19	0.000150033	3.23e-17
co-occurence of coordinated regulators	Coordinated Regulator	Coordinated Regulator	ceh-23	ztf-14	M00671_2.00	M00628_2.00	ADF	119	51.0017	2.33326	9.34e-19	3.93e-05	0.00111728
co-occurence of coordinated regulators	Coordinated Regulator	Coordinated Regulator	ztf-14	ztf-11	M00628_2.00	M00650_2.00	ADF	152	77.7309	1.95546	4.72e-17	0.00275032	8.91e-19
co-occurence of coordinated regulators	Coordinated Regulator	Coordinated Regulator	mxl-3	dmd-6	M00935_2.00	M00655_2.00	ADF	162	88.9882	1.82047	2.09e-15	0.000425477	1.42e-19
co-occurence of coordinated regulators	Coordinated Regulator	Coordinated Regulator	ceh-57	dmd-6	M00675_2.00	M00655_2.00	ADF	165	91.6984	1.79938	2.9e-15	0.00607423	9.78e-19
co-occurence of coordinated regulators	Coordinated Regulator	Coordinated Regulator	ztf-14	dmd-6	M00628_2.00	M00655_2.00	ADF	153	86.5584	1.76759	2.12e-13	0.00164193	2.21e-23
co-occurence of coordinated regulators	Coordinated Regulator	Coordinated Regulator	hlh-4	ztf-11	OH2018_HLH-4	M00650_2.00	ADL	323	156.178	2.06815	3.06e-48	4.44e-23	2.92e-08
co-occurence of coordinated regulators	Coordinated Regulator	Coordinated Regulator	hlh-4	nhr-6	OH2018_HLH-4	M01298_2.00	ADL	244	104.457	2.33588	1.04e-41	1.55e-20	0.00300794
co-occurence of coordinated regulators	Coordinated Regulator	Coordinated Regulator	hlh-4	unc-86	OH2018_HLH-4	M02244_2.00	ADL	180	70.0496	2.56961	3.53e-34	3.69e-18	0.00548687
co-occurence of coordinated regulators	Coordinated Regulator	Coordinated Regulator	hlh-4	ztf-3	OH2018_HLH-4	M00640_2.00	ADL	193	81.2285	2.37601	2.2e-32	1.94e-19	0.0327632
co-occurence of coordinated regulators	Coordinated Regulator	Coordinated Regulator	hlh-4	fkh-8	OH2018_HLH-4	M03026_2.00	ADL	190	80.1397	2.37086	1.12e-31	3.96e-16	0.00175597
co-occurence of coordinated regulators	Coordinated Regulator	Coordinated Regulator	unc-86	nhr-6	M02244_2.00	M01298_2.00	ADL	153	73.6673	2.07691	3.22e-19	0.000693821	9.68e-06
co-occurence of coordinated regulators	Coordinated Regulator	Coordinated Regulator	unc-86	ztf-3	M02244_2.00	M00640_2.00	ADL	123	57.2854	2.14714	2.27e-16	5.46e-07	1.77e-06
co-occurence of coordinated regulators	Coordinated Regulator	Coordinated Regulator	fkh-8	nhr-6	M03026_2.00	M01298_2.00	ADL	159	84.2784	1.8866	4.05e-16	6.69e-06	1.68e-08
co-occurence of coordinated regulators	Coordinated Regulator	Coordinated Regulator	unc-86	fkh-8	M02244_2.00	M03026_2.00	ADL	120	56.5175	2.12324	1.31e-15	2.53e-05	2.43e-07
co-occurence of coordinated regulators	Coordinated Regulator	Coordinated Regulator	fkh-8	ztf-3	M03026_2.00	M00640_2.00	ADL	129	65.5369	1.96836	2.7e-14	4.69e-09	5.71e-06
co-occurence of coordinated regulators	Coordinated Regulator	Coordinated Regulator	ztf-3	nhr-6	M00640_2.00	M01298_2.00	ADL	155	85.4235	1.81449	3.1e-14	0.000250006	5.68e-07
co-occurence of coordinated regulators	Coordinated Regulator	Coordinated Regulator	unc-86	ztf-11	M02244_2.00	M00650_2.00	ADL	179	110.143	1.62517	3.49e-12	0.00566336	1.81e-12
co-occurence of coordinated regulators	Coordinated Regulator	Coordinated Regulator	ztf-11	nhr-6	M00650_2.00	M01298_2.00	ADL	241	164.244	1.46733	4.77e-12	1.1e-12	4.73e-05
co-occurence of coordinated regulators	Coordinated Regulator	Coordinated Regulator	fkh-8	ztf-11	M03026_2.00	M00650_2.00	ADL	195	126.008	1.54752	2.06e-11	3.17e-05	6.36e-15
co-occurence of coordinated regulators	Coordinated Regulator	Coordinated Regulator	ztf-3	ztf-11	M00640_2.00	M00650_2.00	ADL	189	127.72	1.4798	2.21e-09	0.00137827	3.72e-19
co-occurence of coordinated regulators	Coordinated Regulator	Coordinated Regulator	atf-7	atf-5	M00595_2.00	M00593_2.00	AFD	161	38.171	4.21786	1.86e-61	6.37e-14	8.36e-06
co-occurence of coordinated regulators	Coordinated Regulator	Coordinated Regulator	ttx-1	ztf-3	M00396_2.00	M00640_2.00	AFD	133	25.7174	5.1716	1.84e-59	4e-06	1.72e-12
co-occurence of coordinated regulators	Coordinated Regulator	Coordinated Regulator	ttx-1	gei-3	M00396_2.00	M00711_2.00	AFD	133	26.1579	5.08451	1.42e-58	4.49e-08	1.36e-13
co-occurence of coordinated regulators	Coordinated Regulator	Coordinated Regulator	ttx-1	nhr-6	M00396_2.00	M01298_2.00	AFD	147	33.0718	4.44488	4.69e-58	1.51e-09	1.38e-18
co-occurence of coordinated regulators	Coordinated Regulator	Coordinated Regulator	atf-7	ttx-1	M00595_2.00	M00396_2.00	AFD	129	26.0583	4.95044	3.09e-55	7.94e-14	3.89e-07
co-occurence of coordinated regulators	Coordinated Regulator	Coordinated Regulator	ceh-74	ttx-1	M01248_2.00	M00396_2.00	AFD	103	17.4973	5.88662	5.09e-50	1.63e-07	9e-09
co-occurence of coordinated regulators	Coordinated Regulator	Coordinated Regulator	ttx-1	ztf-9	M00396_2.00	M00636_2.00	AFD	110	20.4467	5.37983	8.32e-50	5.11e-10	1.76e-07
co-occurence of coordinated regulators	Coordinated Regulator	Coordinated Regulator	ttx-1	ztf-11	M00396_2.00	M00650_2.00	AFD	166	49.4468	3.35715	1.05e-49	3.34e-07	1.24e-19
co-occurence of coordinated regulators	Coordinated Regulator	Coordinated Regulator	ttx-1	nhr-36	M00396_2.00	M02418_2.00	AFD	120	25.1237	4.77637	2.78e-49	3.11e-06	2.56e-07
co-occurence of coordinated regulators	Coordinated Regulator	Coordinated Regulator	fos-1	ttx-1	M01144_2.00	M00396_2.00	AFD	108	19.9449	5.41491	4.29e-49	3.99e-05	4.65e-08
co-occurence of coordinated regulators	Coordinated Regulator	Coordinated Regulator	gei-3	ztf-3	M00711_2.00	M00640_2.00	AFD	152	42.0153	3.61773	1.08e-48	1.4e-12	2.91e-12
co-occurence of coordinated regulators	Coordinated Regulator	Coordinated Regulator	ceh-54	ttx-1	M02188_2.00	M00396_2.00	AFD	128	29.6972	4.31018	5.32e-48	2.37e-11	5.66e-09
co-occurence of coordinated regulators	Coordinated Regulator	Coordinated Regulator	atf-5	ttx-1	M00593_2.00	M00396_2.00	AFD	113	23.4536	4.81802	1.74e-46	4.35e-08	2.63e-08
co-occurence of coordinated regulators	Coordinated Regulator	Coordinated Regulator	ttx-1	dmd-8	M00396_2.00	M00660_2.00	AFD	171	55.6635	3.07203	3.48e-46	1.56e-07	5.49e-27
co-occurence of coordinated regulators	Coordinated Regulator	Coordinated Regulator	gei-3	nhr-6	M00711_2.00	M01298_2.00	AFD	168	54.0304	3.10936	7.13e-46	2.18e-12	5.66e-18
co-occurence of coordinated regulators	Coordinated Regulator	Coordinated Regulator	ceh-74	ztf-3	M01248_2.00	M00640_2.00	AFD	122	28.1045	4.34094	8.49e-46	1.83e-07	9.19e-12
co-occurence of coordinated regulators	Coordinated Regulator	Coordinated Regulator	ttx-1	egl-13	M00396_2.00	M00710_2.00	AFD	153	44.8924	3.40815	8.58e-46	1.32e-08	6.86e-15
co-occurence of coordinated regulators	Coordinated Regulator	Coordinated Regulator	lim-7	ttx-1	M01242_2.00	M00396_2.00	AFD	122	28.5595	4.27178	4.53e-45	2.47e-07	1.6e-09
co-occurence of coordinated regulators	Coordinated Regulator	Coordinated Regulator	ztf-3	nhr-6	M00640_2.00	M01298_2.00	AFD	165	53.1205	3.10614	8.66e-45	3.2e-12	1.78e-14
co-occurence of coordinated regulators	Coordinated Regulator	Coordinated Regulator	atf-7	nhr-6	M00595_2.00	M01298_2.00	AFD	166	53.8247	3.08409	1.03e-44	4.03e-13	6.93e-16
co-occurence of coordinated regulators	Coordinated Regulator	Coordinated Regulator	atf-7	ztf-3	M00595_2.00	M00640_2.00	AFD	146	41.8553	3.48821	1.68e-44	6.05e-12	6.04e-10
co-occurence of coordinated regulators	Coordinated Regulator	Coordinated Regulator	ceh-54	ztf-3	M02188_2.00	M00640_2.00	AFD	152	47.7002	3.18657	7.84e-42	1.26e-08	5.5e-13
co-occurence of coordinated regulators	Coordinated Regulator	Coordinated Regulator	gei-3	ztf-9	M00711_2.00	M00636_2.00	AFD	127	33.4045	3.80189	9.93e-42	3.62e-12	5.61e-08
co-occurence of coordinated regulators	Coordinated Regulator	Coordinated Regulator	atf-5	nhr-6	M00593_2.00	M01298_2.00	AFD	153	48.4446	3.15825	1.09e-41	1.48e-05	8.92e-11
co-occurence of coordinated regulators	Coordinated Regulator	Coordinated Regulator	ceh-58	ttx-1	M00676_2.00	M00396_2.00	AFD	111	25.296	4.38804	1.09e-41	7.92e-10	2.98e-08
co-occurence of coordinated regulators	Coordinated Regulator	Coordinated Regulator	ceh-14	ttx-1	M00435_2.00	M00396_2.00	AFD	146	44.2144	3.30209	1.14e-41	1.4e-18	9.09e-08
co-occurence of coordinated regulators	Coordinated Regulator	Coordinated Regulator	atf-7	gei-3	M00595_2.00	M00711_2.00	AFD	143	42.5722	3.359	1.65e-41	1.1e-14	2.35e-14
co-occurence of coordinated regulators	Coordinated Regulator	Coordinated Regulator	ztf-3	ztf-9	M00640_2.00	M00636_2.00	AFD	125	32.8419	3.80611	4.9e-41	1.74e-10	9.77e-09
co-occurence of coordinated regulators	Coordinated Regulator	Coordinated Regulator	ceh-23	ttx-1	M00671_2.00	M00396_2.00	AFD	124	32.4436	3.82202	7.5e-41	1.23e-08	5.09e-08
co-occurence of coordinated regulators	Coordinated Regulator	Coordinated Regulator	ztf-3	nhr-36	M00640_2.00	M02418_2.00	AFD	138	40.3541	3.41973	1.12e-40	5.31e-10	1.08e-05
co-occurence of coordinated regulators	Coordinated Regulator	Coordinated Regulator	atf-5	ztf-3	M00593_2.00	M00640_2.00	AFD	133	37.6716	3.53051	1.83e-40	1.53e-05	6.79e-09
co-occurence of coordinated regulators	Coordinated Regulator	Coordinated Regulator	fos-1	gei-3	M01144_2.00	M00711_2.00	AFD	123	32.5847	3.77478	6.26e-40	3.39e-06	1.5e-10
co-occurence of coordinated regulators	Coordinated Regulator	Coordinated Regulator	ztf-9	nhr-6	M00636_2.00	M01298_2.00	AFD	140	42.2337	3.31489	7.73e-40	8.75e-08	3.2e-14
co-occurence of coordinated regulators	Coordinated Regulator	Coordinated Regulator	fos-1	nhr-6	M01144_2.00	M01298_2.00	AFD	138	41.1973	3.34974	1.12e-39	6.93e-06	7.58e-12
co-occurence of coordinated regulators	Coordinated Regulator	Coordinated Regulator	nhr-6	nhr-36	M01298_2.00	M02418_2.00	AFD	155	51.8942	2.98685	2.26e-39	6.2e-13	1.95e-06
co-occurence of coordinated regulators	Coordinated Regulator	Coordinated Regulator	atf-7	ceh-74	M00595_2.00	M01248_2.00	AFD	114	28.4771	4.00322	4.36e-39	4.02e-12	7.43e-07
co-occurence of coordinated regulators	Coordinated Regulator	Coordinated Regulator	ceh-74	gei-3	M01248_2.00	M00711_2.00	AFD	113	28.5859	3.953	3.41e-38	3.06e-08	3.95e-15
co-occurence of coordinated regulators	Coordinated Regulator	Coordinated Regulator	ttx-1	dmd-9	M00396_2.00	M00661_2.00	AFD	83	14.8965	5.57179	4.89e-38	4.2e-07	4.43e-07
co-occurence of coordinated regulators	Coordinated Regulator	Coordinated Regulator	atf-7	nhr-36	M00595_2.00	M02418_2.00	AFD	135	40.8891	3.30162	5.4e-38	3.31e-11	2.99e-06
co-occurence of coordinated regulators	Coordinated Regulator	Coordinated Regulator	atf-7	ceh-54	M00595_2.00	M02188_2.00	AFD	147	48.3325	3.04143	7.94e-38	8.04e-12	5.14e-07
co-occurence of coordinated regulators	Coordinated Regulator	Coordinated Regulator	gei-3	nhr-36	M00711_2.00	M02418_2.00	AFD	135	41.0453	3.28905	8.16e-38	3.39e-14	1.92e-07
co-occurence of coordinated regulators	Coordinated Regulator	Coordinated Regulator	egl-13	ztf-3	M00710_2.00	M00640_2.00	AFD	182	72.1071	2.52402	8.58e-38	1.12e-14	3.07e-09
co-occurence of coordinated regulators	Coordinated Regulator	Coordinated Regulator	ceh-38	ttx-1	M03716_2.00	M00396_2.00	AFD	129	37.6338	3.42777	9.89e-38	2.59e-05	1.34e-07
co-occurence of coordinated regulators	Coordinated Regulator	Coordinated Regulator	ceh-54	gei-3	M02188_2.00	M00711_2.00	AFD	147	48.5172	3.02985	1.23e-37	2.95e-12	3.72e-14
co-occurence of coordinated regulators	Coordinated Regulator	Coordinated Regulator	ttx-1	dsc-1	M00396_2.00	M02063_2.00	AFD	92	19.0103	4.83948	2.08e-37	2.73e-07	0.000451856
co-occurence of coordinated regulators	Coordinated Regulator	Coordinated Regulator	ztf-3	ztf-11	M00640_2.00	M00650_2.00	AFD	191	79.4224	2.40486	2.73e-37	1.53e-10	4.32e-19
co-occurence of coordinated regulators	Coordinated Regulator	Coordinated Regulator	lim-7	gei-3	M01242_2.00	M00711_2.00	AFD	143	46.6586	3.06481	5.66e-37	4.27e-07	2.53e-14
co-occurence of coordinated regulators	Coordinated Regulator	Coordinated Regulator	atf-7	ztf-9	M00595_2.00	M00636_2.00	AFD	120	33.2773	3.60606	6.9e-37	1.78e-13	4.69e-07
co-occurence of coordinated regulators	Coordinated Regulator	Coordinated Regulator	ceh-74	nhr-36	M01248_2.00	M02418_2.00	AFD	109	27.4557	3.97003	7.03e-37	4.6e-07	1.59e-08
co-occurence of coordinated regulators	Coordinated Regulator	Coordinated Regulator	ceh-74	nhr-6	M01248_2.00	M01298_2.00	AFD	125	36.1416	3.45862	8.64e-37	1.07e-07	2.13e-15
co-occurence of coordinated regulators	Coordinated Regulator	Coordinated Regulator	ceh-54	ztf-9	M02188_2.00	M00636_2.00	AFD	128	37.9243	3.37515	1.05e-36	3.34e-08	2.27e-06
co-occurence of coordinated regulators	Coordinated Regulator	Coordinated Regulator	fos-1	ztf-3	M01144_2.00	M00640_2.00	AFD	117	32.036	3.65215	2.21e-36	2.87e-06	2.31e-09
co-occurence of coordinated regulators	Coordinated Regulator	Coordinated Regulator	atf-5	ztf-9	M00593_2.00	M00636_2.00	AFD	113	29.951	3.77283	2.64e-36	4.05e-07	1.71e-07
co-occurence of coordinated regulators	Coordinated Regulator	Coordinated Regulator	ceh-58	ceh-54	M00676_2.00	M02188_2.00	AFD	142	46.9187	3.02651	4.63e-36	1.66e-08	1.89e-11
co-occurence of coordinated regulators	Coordinated Regulator	Coordinated Regulator	fos-1	nhr-36	M01144_2.00	M02418_2.00	AFD	115	31.2964	3.67455	6.12e-36	7.28e-06	1.22e-05
co-occurence of coordinated regulators	Coordinated Regulator	Coordinated Regulator	atf-7	egl-13	M00595_2.00	M00710_2.00	AFD	180	73.0629	2.46363	8.14e-36	1.28e-10	2.34e-12
co-occurence of coordinated regulators	Coordinated Regulator	Coordinated Regulator	ceh-14	ztf-3	M00435_2.00	M00640_2.00	AFD	177	71.0181	2.49232	1.08e-35	3.84e-15	5.58e-11
co-occurence of coordinated regulators	Coordinated Regulator	Coordinated Regulator	atf-5	gei-3	M00593_2.00	M00711_2.00	AFD	127	38.3169	3.31446	1.4e-35	1.93e-05	1.26e-12
co-occurence of coordinated regulators	Coordinated Regulator	Coordinated Regulator	ceh-54	nhr-6	M02188_2.00	M01298_2.00	AFD	162	61.341	2.64097	7.04e-35	6.61e-10	2.66e-16
co-occurence of coordinated regulators	Coordinated Regulator	Coordinated Regulator	atf-5	ceh-54	M00593_2.00	M02188_2.00	AFD	134	43.5014	3.08036	1.75e-34	0.000117736	6.75e-07
co-occurence of coordinated regulators	Coordinated Regulator	Coordinated Regulator	ceh-74	ztf-9	M01248_2.00	M00636_2.00	AFD	95	22.3447	4.25158	3.82e-34	3.25e-05	2.86e-05
co-occurence of coordinated regulators	Coordinated Regulator	Coordinated Regulator	ztf-3	dmd-8	M00640_2.00	M00660_2.00	AFD	198	89.4079	2.21457	6.29e-34	1.78e-09	1.58e-28
co-occurence of coordinated regulators	Coordinated Regulator	Coordinated Regulator	fos-1	ztf-9	M01144_2.00	M00636_2.00	AFD	101	25.4704	3.96539	6.55e-34	7.69e-06	2.21e-06
co-occurence of coordinated regulators	Coordinated Regulator	Coordinated Regulator	egl-13	nhr-6	M00710_2.00	M01298_2.00	AFD	202	92.7275	2.17843	7.38e-34	9.21e-16	1.07e-13
co-occurence of coordinated regulators	Coordinated Regulator	Coordinated Regulator	atf-5	ceh-74	M00593_2.00	M01248_2.00	AFD	101	25.6306	3.9406	1.1e-33	9.41e-05	4.08e-07
co-occurence of coordinated regulators	Coordinated Regulator	Coordinated Regulator	ceh-58	ceh-23	M00676_2.00	M00671_2.00	AFD	145	51.2577	2.82884	1.1e-33	1.79e-07	1.08e-09
co-occurence of coordinated regulators	Coordinated Regulator	Coordinated Regulator	ceh-58	ztf-3	M00676_2.00	M00640_2.00	AFD	128	40.631	3.15031	1.12e-33	1.34e-07	2.35e-12
co-occurence of coordinated regulators	Coordinated Regulator	Coordinated Regulator	ztf-9	nhr-36	M00636_2.00	M02418_2.00	AFD	113	32.0838	3.52203	1.43e-33	1.7e-07	4.36e-07
co-occurence of coordinated regulators	Coordinated Regulator	Coordinated Regulator	ceh-23	ztf-3	M00671_2.00	M00640_2.00	AFD	146	52.1115	2.80168	1.69e-33	2.98e-07	1.52e-11
co-occurence of coordinated regulators	Coordinated Regulator	Coordinated Regulator	atf-5	nhr-36	M00593_2.00	M02418_2.00	AFD	121	36.8019	3.28787	2.39e-33	0.00141726	2e-06
co-occurence of coordinated regulators	Coordinated Regulator	Coordinated Regulator	ceh-58	ztf-9	M00676_2.00	M00636_2.00	AFD	113	32.3039	3.49803	2.66e-33	3.27e-09	3.25e-11
co-occurence of coordinated regulators	Coordinated Regulator	Coordinated Regulator	ceh-23	gei-3	M00671_2.00	M00711_2.00	AFD	147	53.0041	2.77337	2.78e-33	7.65e-09	6.07e-13
co-occurence of coordinated regulators	Coordinated Regulator	Coordinated Regulator	atf-7	ztf-11	M00595_2.00	M00650_2.00	AFD	185	80.4752	2.29885	4.96e-33	2.6e-11	1.24e-21
co-occurence of coordinated regulators	Coordinated Regulator	Coordinated Regulator	gei-3	egl-13	M00711_2.00	M00710_2.00	AFD	175	73.3422	2.38608	1.03e-32	7.01e-14	1.54e-18
co-occurence of coordinated regulators	Coordinated Regulator	Coordinated Regulator	ztf-11	nhr-6	M00650_2.00	M01298_2.00	AFD	211	102.135	2.0659	1.49e-32	1.16e-20	5.14e-14
co-occurence of coordinated regulators	Coordinated Regulator	Coordinated Regulator	ztf-3	dmd-9	M00640_2.00	M00661_2.00	AFD	96	23.927	4.0122	1.61e-32	1.98e-06	4.14e-05
co-occurence of coordinated regulators	Coordinated Regulator	Coordinated Regulator	fos-1	ceh-54	M01144_2.00	M02188_2.00	AFD	120	36.9936	3.24381	1.74e-32	5.68e-05	5.13e-10
co-occurence of coordinated regulators	Coordinated Regulator	Coordinated Regulator	ceh-54	dsc-1	M02188_2.00	M02063_2.00	AFD	117	35.2601	3.3182	1.76e-32	2.17e-08	0.000199031
co-occurence of coordinated regulators	Coordinated Regulator	Coordinated Regulator	atf-7	fos-1	M00595_2.00	M01144_2.00	AFD	112	32.4606	3.45033	1.91e-32	1.02e-11	2.72e-05
co-occurence of coordinated regulators	Coordinated Regulator	Coordinated Regulator	ceh-14	gei-3	M00435_2.00	M00711_2.00	AFD	173	72.2345	2.39498	1.97e-32	8.44e-18	5.52e-13
co-occurence of coordinated regulators	Coordinated Regulator	Coordinated Regulator	atf-7	ceh-14	M00595_2.00	M00435_2.00	AFD	172	71.9595	2.39023	4.44e-32	2.44e-11	7.97e-16
co-occurence of coordinated regulators	Coordinated Regulator	Coordinated Regulator	fos-1	egl-13	M01144_2.00	M00710_2.00	AFD	149	55.9222	2.66442	7.02e-32	1.2e-05	2.6e-12
co-occurence of coordinated regulators	Coordinated Regulator	Coordinated Regulator	ceh-23	ceh-54	M00671_2.00	M02188_2.00	AFD	155	60.1758	2.57578	9.24e-32	1.32e-07	5.94e-10
co-occurence of coordinated regulators	Coordinated Regulator	Coordinated Regulator	fos-1	atf-5	M01144_2.00	M00593_2.00	AFD	105	29.216	3.59392	1.03e-31	7.61e-05	0.000153307
co-occurence of coordinated regulators	Coordinated Regulator	Coordinated Regulator	ceh-23	ztf-9	M00671_2.00	M00636_2.00	AFD	126	41.4315	3.04116	1.39e-31	2.35e-08	2.07e-08
co-occurence of coordinated regulators	Coordinated Regulator	Coordinated Regulator	lim-7	ztf-3	M01242_2.00	M00640_2.00	AFD	133	45.8729	2.89932	1.71e-31	7.28e-07	2.85e-13
co-occurence of coordinated regulators	Coordinated Regulator	Coordinated Regulator	ceh-54	nhr-36	M02188_2.00	M02418_2.00	AFD	134	46.599	2.8756	2.08e-31	1.7e-06	4.96e-06
co-occurence of coordinated regulators	Coordinated Regulator	Coordinated Regulator	gei-3	dmd-9	M00711_2.00	M00661_2.00	AFD	95	24.3368	3.90355	3.14e-31	8.5e-10	1.11e-06
co-occurence of coordinated regulators	Coordinated Regulator	Coordinated Regulator	gei-3	ztf-11	M00711_2.00	M00650_2.00	AFD	182	80.7828	2.25296	3.7e-31	1.6e-12	9.37e-22
co-occurence of coordinated regulators	Coordinated Regulator	Coordinated Regulator	egl-13	nhr-36	M00710_2.00	M02418_2.00	AFD	168	70.4424	2.38493	5.34e-31	1.61e-17	5.46e-06
co-occurence of coordinated regulators	Coordinated Regulator	Coordinated Regulator	atf-7	lim-7	M00595_2.00	M01242_2.00	AFD	133	46.481	2.86139	6.42e-31	1.25e-12	0.000148599
co-occurence of coordinated regulators	Coordinated Regulator	Coordinated Regulator	gei-3	dmd-8	M00711_2.00	M00660_2.00	AFD	194	90.9393	2.13329	1.05e-30	1.91e-11	1.42e-27
co-occurence of coordinated regulators	Coordinated Regulator	Coordinated Regulator	fos-1	ceh-74	M01144_2.00	M01248_2.00	AFD	89	21.7963	4.08326	1.41e-30	1.67e-06	4.4e-07
co-occurence of coordinated regulators	Coordinated Regulator	Coordinated Regulator	atf-7	ceh-23	M00595_2.00	M00671_2.00	AFD	142	52.8023	2.68928	1.63e-30	3.77e-12	2.37e-06
co-occurence of coordinated regulators	Coordinated Regulator	Coordinated Regulator	ceh-74	ceh-54	M01248_2.00	M02188_2.00	AFD	109	32.4537	3.35863	1.74e-30	3.32e-08	3.31e-07
co-occurence of coordinated regulators	Coordinated Regulator	Coordinated Regulator	ceh-58	gei-3	M00676_2.00	M00711_2.00	AFD	124	41.3269	3.00047	1.85e-30	3.59e-10	6.25e-14
co-occurence of coordinated regulators	Coordinated Regulator	Coordinated Regulator	ceh-58	nhr-6	M00676_2.00	M01298_2.00	AFD	141	52.2502	2.69855	2.05e-30	2.26e-08	8.44e-17
co-occurence of coordinated regulators	Coordinated Regulator	Coordinated Regulator	ceh-74	egl-13	M01248_2.00	M00710_2.00	AFD	136	49.0594	2.77215	2.51e-30	8.76e-06	1.94e-17
co-occurence of coordinated regulators	Coordinated Regulator	Coordinated Regulator	dsc-1	gei-3	M02063_2.00	M00711_2.00	AFD	106	31.0578	3.41299	3.76e-30	0.00015769	7.99e-10
co-occurence of coordinated regulators	Coordinated Regulator	Coordinated Regulator	ceh-74	ztf-11	M01248_2.00	M00650_2.00	AFD	143	54.0366	2.64636	4.97e-30	2.71e-06	5.82e-19
co-occurence of coordinated regulators	Coordinated Regulator	Coordinated Regulator	ceh-14	nhr-6	M00435_2.00	M01298_2.00	AFD	193	91.3271	2.11328	6.33e-30	6.32e-18	1.11e-13
co-occurence of coordinated regulators	Coordinated Regulator	Coordinated Regulator	lim-7	nhr-6	M01242_2.00	M01298_2.00	AFD	150	58.9912	2.54275	6.81e-30	1.16e-05	1.06e-17
co-occurence of coordinated regulators	Coordinated Regulator	Coordinated Regulator	lim-7	ztf-9	M01242_2.00	M00636_2.00	AFD	115	36.4715	3.15315	7.02e-30	3.18e-07	2.31e-10
co-occurence of coordinated regulators	Coordinated Regulator	Coordinated Regulator	atf-7	dmd-8	M00595_2.00	M00660_2.00	AFD	192	90.593	2.11937	7.08e-30	5.38e-11	2.01e-24
co-occurence of coordinated regulators	Coordinated Regulator	Coordinated Regulator	dmd-9	nhr-6	M00661_2.00	M01298_2.00	AFD	105	30.7694	3.41248	7.76e-30	3.74e-06	7.13e-11
co-occurence of coordinated regulators	Coordinated Regulator	Coordinated Regulator	ceh-14	nhr-36	M00435_2.00	M02418_2.00	AFD	164	69.3786	2.36384	1.33e-29	7.1e-15	6.75e-06
co-occurence of coordinated regulators	Coordinated Regulator	Coordinated Regulator	atf-7	ceh-58	M00595_2.00	M00676_2.00	AFD	122	41.1696	2.96335	2.11e-29	5.83e-11	1.1e-07
co-occurence of coordinated regulators	Coordinated Regulator	Coordinated Regulator	atf-5	dsc-1	M00593_2.00	M02063_2.00	AFD	99	27.8469	3.55515	2.16e-29	0.0264515	0.0035804
co-occurence of coordinated regulators	Coordinated Regulator	Coordinated Regulator	ceh-38	ztf-3	M03716_2.00	M00640_2.00	AFD	151	60.4481	2.49801	2.74e-29	0.000138864	8.96e-12
co-occurence of coordinated regulators	Coordinated Regulator	Coordinated Regulator	atf-7	dmd-9	M00595_2.00	M00661_2.00	AFD	92	24.2442	3.79473	2.85e-29	4.31e-11	5.02e-06
co-occurence of coordinated regulators	Coordinated Regulator	Coordinated Regulator	ztf-11	nhr-36	M00650_2.00	M02418_2.00	AFD	174	77.5888	2.24259	4.22e-29	9.06e-20	1.34e-05
co-occurence of coordinated regulators	Coordinated Regulator	Coordinated Regulator	ceh-74	ceh-23	M01248_2.00	M00671_2.00	AFD	112	35.4551	3.15893	4.37e-29	7.27e-07	8.68e-09
co-occurence of coordinated regulators	Coordinated Regulator	Coordinated Regulator	egl-13	ztf-9	M00710_2.00	M00636_2.00	AFD	146	57.3291	2.5467	5.34e-29	1.13e-13	4.05e-07
co-occurence of coordinated regulators	Coordinated Regulator	Coordinated Regulator	ceh-74	ceh-14	M01248_2.00	M00435_2.00	AFD	132	48.3185	2.73187	1.16e-28	7.45e-07	8.44e-18
co-occurence of coordinated regulators	Coordinated Regulator	Coordinated Regulator	ceh-23	nhr-6	M00671_2.00	M01298_2.00	AFD	159	67.0138	2.37264	1.2e-28	2.57e-08	1.81e-14
co-occurence of coordinated regulators	Coordinated Regulator	Coordinated Regulator	atf-5	egl-13	M00593_2.00	M00710_2.00	AFD	157	65.7598	2.38748	1.69e-28	0.000279852	1.31e-13
co-occurence of coordinated regulators	Coordinated Regulator	Coordinated Regulator	ceh-58	nhr-36	M00676_2.00	M02418_2.00	AFD	118	39.693	2.97282	1.93e-28	7.77e-07	1.58e-08
co-occurence of coordinated regulators	Coordinated Regulator	Coordinated Regulator	ceh-54	egl-13	M02188_2.00	M00710_2.00	AFD	180	83.2657	2.16175	2.06e-28	1.12e-07	2.73e-14
co-occurence of coordinated regulators	Coordinated Regulator	Coordinated Regulator	fos-1	ceh-23	M01144_2.00	M00671_2.00	AFD	119	40.4148	2.94447	2.45e-28	2.32e-05	3.41e-07
co-occurence of coordinated regulators	Coordinated Regulator	Coordinated Regulator	ceh-74	dmd-9	M01248_2.00	M00661_2.00	AFD	74	16.2792	4.54568	3.9e-28	3.25e-07	3.13e-06
co-occurence of coordinated regulators	Coordinated Regulator	Coordinated Regulator	ceh-58	lim-7	M00676_2.00	M01242_2.00	AFD	126	45.1213	2.79247	4.7e-28	1.72e-08	7.57e-06
co-occurence of coordinated regulators	Coordinated Regulator	Coordinated Regulator	ceh-74	lim-7	M01248_2.00	M01242_2.00	AFD	103	31.2105	3.30017	4.75e-28	1.65e-06	4.75e-07
co-occurence of coordinated regulators	Coordinated Regulator	Coordinated Regulator	atf-7	dsc-1	M00595_2.00	M02063_2.00	AFD	102	30.9395	3.29675	1.01e-27	1.01e-10	0.00203891
co-occurence of coordinated regulators	Coordinated Regulator	Coordinated Regulator	fos-1	ceh-58	M01144_2.00	M00676_2.00	AFD	103	31.5111	3.26869	1.02e-27	5.08e-06	1.09e-06
co-occurence of coordinated regulators	Coordinated Regulator	Coordinated Regulator	dmd-9	nhr-36	M00661_2.00	M02418_2.00	AFD	88	23.3746	3.76477	1.09e-27	5.87e-06	6.01e-06
co-occurence of coordinated regulators	Coordinated Regulator	Coordinated Regulator	ceh-23	nhr-36	M00671_2.00	M02418_2.00	AFD	134	50.9085	2.63218	1.4e-27	2.77e-06	1.26e-07
co-occurence of coordinated regulators	Coordinated Regulator	Coordinated Regulator	fos-1	ceh-14	M01144_2.00	M00435_2.00	AFD	140	55.0776	2.54187	1.71e-27	8.8e-05	3.69e-14
co-occurence of coordinated regulators	Coordinated Regulator	Coordinated Regulator	dmd-8	nhr-6	M00660_2.00	M01298_2.00	AFD	216	114.976	1.87866	1.84e-27	7.11e-27	7.45e-14
co-occurence of coordinated regulators	Coordinated Regulator	Coordinated Regulator	ceh-14	ceh-23	M00435_2.00	M00671_2.00	AFD	186	89.5924	2.07607	1.98e-27	3.72e-17	1.34e-06
co-occurence of coordinated regulators	Coordinated Regulator	Coordinated Regulator	ceh-38	gei-3	M03716_2.00	M00711_2.00	AFD	149	61.4835	2.42341	2.09e-27	0.000182712	2.9e-13
co-occurence of coordinated regulators	Coordinated Regulator	Coordinated Regulator	ceh-23	dsc-1	M00671_2.00	M02063_2.00	AFD	114	38.5209	2.95943	3.35e-27	9.37e-07	0.00139291
co-occurence of coordinated regulators	Coordinated Regulator	Coordinated Regulator	ceh-14	ceh-54	M00435_2.00	M02188_2.00	AFD	176	82.0082	2.14613	3.46e-27	4.6e-16	8.97e-08
co-occurence of coordinated regulators	Coordinated Regulator	Coordinated Regulator	lim-7	nhr-36	M01242_2.00	M02418_2.00	AFD	124	44.8139	2.767	3.49e-27	5.71e-07	1.41e-07
co-occurence of coordinated regulators	Coordinated Regulator	Coordinated Regulator	ceh-74	dsc-1	M01248_2.00	M02063_2.00	AFD	82	20.7749	3.94707	4.33e-27	3.67e-05	0.00139443
co-occurence of coordinated regulators	Coordinated Regulator	Coordinated Regulator	dsc-1	nhr-36	M02063_2.00	M02418_2.00	AFD	99	29.8298	3.31883	4.54e-27	0.00119492	3.34e-07
co-occurence of coordinated regulators	Coordinated Regulator	Coordinated Regulator	atf-7	ceh-38	M00595_2.00	M03716_2.00	AFD	148	61.2494	2.41635	4.75e-27	5.72e-12	0.00044865
co-occurence of coordinated regulators	Coordinated Regulator	Coordinated Regulator	atf-5	dmd-9	M00593_2.00	M00661_2.00	AFD	84	21.8208	3.84953	4.91e-27	6.03e-05	3.31e-06
co-occurence of coordinated regulators	Coordinated Regulator	Coordinated Regulator	ceh-38	nhr-6	M03716_2.00	M01298_2.00	AFD	170	77.7345	2.18693	6.23e-27	0.000368236	6.64e-15
co-occurence of coordinated regulators	Coordinated Regulator	Coordinated Regulator	atf-5	ztf-11	M00593_2.00	M00650_2.00	AFD	163	72.4312	2.25041	6.53e-27	2.46e-05	4.06e-19
co-occurence of coordinated regulators	Coordinated Regulator	Coordinated Regulator	fos-1	ztf-11	M01144_2.00	M00650_2.00	AFD	148	61.5955	2.40277	8.6e-27	1.2e-05	4.19e-15
co-occurence of coordinated regulators	Coordinated Regulator	Coordinated Regulator	atf-5	ceh-23	M00593_2.00	M00671_2.00	AFD	127	47.5244	2.67231	1.59e-26	2.87e-05	9.66e-06
co-occurence of coordinated regulators	Coordinated Regulator	Coordinated Regulator	dsc-1	nhr-6	M02063_2.00	M01298_2.00	AFD	114	39.2668	2.90322	1.73e-26	0.00030545	4.49e-11
co-occurence of coordinated regulators	Coordinated Regulator	Coordinated Regulator	lim-7	ceh-54	M01242_2.00	M02188_2.00	AFD	135	52.9718	2.54853	1.89e-26	2.53e-05	2.86e-11
co-occurence of coordinated regulators	Coordinated Regulator	Coordinated Regulator	atf-5	lim-7	M00593_2.00	M01242_2.00	AFD	118	41.8349	2.82061	1.99e-26	3.47e-05	0.000324142
co-occurence of coordinated regulators	Coordinated Regulator	Coordinated Regulator	ceh-54	dmd-9	M02188_2.00	M00661_2.00	AFD	94	27.6297	3.40213	2.12e-26	1.43e-07	2.13e-05
co-occurence of coordinated regulators	Coordinated Regulator	Coordinated Regulator	dmd-8	nhr-36	M00660_2.00	M02418_2.00	AFD	181	87.3438	2.07227	2.5e-26	4.44e-23	7.01e-05
co-occurence of coordinated regulators	Coordinated Regulator	Coordinated Regulator	dsc-1	ztf-3	M02063_2.00	M00640_2.00	AFD	99	30.5348	3.24221	2.72e-26	0.00161033	7.91e-11
co-occurence of coordinated regulators	Coordinated Regulator	Coordinated Regulator	ztf-9	ztf-11	M00636_2.00	M00650_2.00	AFD	149	63.1452	2.35964	3.49e-26	8.59e-08	8.59e-20
co-occurence of coordinated regulators	Coordinated Regulator	Coordinated Regulator	ztf-9	dmd-9	M00636_2.00	M00661_2.00	AFD	77	19.0233	4.04767	4.44e-26	8.18e-06	1.15e-05
co-occurence of coordinated regulators	Coordinated Regulator	Coordinated Regulator	fos-1	dmd-9	M01144_2.00	M00661_2.00	AFD	76	18.5564	4.09562	4.74e-26	0.000176819	7.6e-06
co-occurence of coordinated regulators	Coordinated Regulator	Coordinated Regulator	ceh-74	dmd-8	M01248_2.00	M00660_2.00	AFD	145	60.8304	2.38368	8.83e-26	7.17e-06	1.64e-23
co-occurence of coordinated regulators	Coordinated Regulator	Coordinated Regulator	atf-5	ceh-14	M00593_2.00	M00435_2.00	AFD	150	64.7667	2.316	1.51e-25	0.000249868	1.47e-13
co-occurence of coordinated regulators	Coordinated Regulator	Coordinated Regulator	egl-13	dmd-9	M00710_2.00	M00661_2.00	AFD	116	41.7671	2.7773	2.37e-25	1.64e-12	6.13e-05
co-occurence of coordinated regulators	Coordinated Regulator	Coordinated Regulator	dsc-1	ztf-9	M02063_2.00	M00636_2.00	AFD	86	24.2768	3.54247	3.16e-25	8.37e-05	6.01e-06
co-occurence of coordinated regulators	Coordinated Regulator	Coordinated Regulator	ceh-74	ceh-58	M01248_2.00	M00676_2.00	AFD	92	27.6441	3.32802	4.01e-25	8.15e-07	1.04e-06
co-occurence of coordinated regulators	Coordinated Regulator	Coordinated Regulator	atf-5	ceh-58	M00593_2.00	M00676_2.00	AFD	108	37.0544	2.91463	4.3e-25	4.39e-06	4.23e-06
co-occurence of coordinated regulators	Coordinated Regulator	Coordinated Regulator	fos-1	dmd-8	M01144_2.00	M00660_2.00	AFD	155	69.3397	2.23537	6.05e-25	1.43e-06	1.76e-19
co-occurence of coordinated regulators	Coordinated Regulator	Coordinated Regulator	lim-7	ceh-23	M01242_2.00	M00671_2.00	AFD	139	57.8706	2.40191	7.9e-25	0.000111183	7.24e-08
co-occurence of coordinated regulators	Coordinated Regulator	Coordinated Regulator	ceh-14	ztf-9	M00435_2.00	M00636_2.00	AFD	137	56.4633	2.42636	7.9e-25	3.08e-14	9.79e-09
co-occurence of coordinated regulators	Coordinated Regulator	Coordinated Regulator	ceh-58	dsc-1	M00676_2.00	M02063_2.00	AFD	95	30.0345	3.16303	2.21e-24	4.48e-05	0.000238496
co-occurence of coordinated regulators	Coordinated Regulator	Coordinated Regulator	ztf-9	dmd-8	M00636_2.00	M00660_2.00	AFD	156	71.0842	2.19458	2.73e-24	2.56e-06	2.72e-21
co-occurence of coordinated regulators	Coordinated Regulator	Coordinated Regulator	ceh-38	ceh-74	M03716_2.00	M01248_2.00	AFD	113	41.1271	2.74758	3.07e-24	0.000354563	5.79e-06
co-occurence of coordinated regulators	Coordinated Regulator	Coordinated Regulator	ceh-14	egl-13	M00435_2.00	M00710_2.00	AFD	219	123.97	1.76656	3.97e-24	3.3e-17	5.16e-14
co-occurence of coordinated regulators	Coordinated Regulator	Coordinated Regulator	ceh-58	egl-13	M00676_2.00	M00710_2.00	AFD	155	70.9257	2.18539	6.64e-24	6.78e-08	3.44e-15
co-occurence of coordinated regulators	Coordinated Regulator	Coordinated Regulator	egl-13	ztf-11	M00710_2.00	M00650_2.00	AFD	234	138.64	1.68782	8.21e-24	4.01e-13	3.14e-19
co-occurence of coordinated regulators	Coordinated Regulator	Coordinated Regulator	ceh-54	ztf-11	M02188_2.00	M00650_2.00	AFD	181	91.7131	1.97355	9.58e-24	6.05e-08	1.32e-21
co-occurence of coordinated regulators	Coordinated Regulator	Coordinated Regulator	ceh-38	ceh-54	M03716_2.00	M02188_2.00	AFD	153	69.8025	2.1919	1.18e-23	0.000139383	1.08e-06
co-occurence of coordinated regulators	Coordinated Regulator	Coordinated Regulator	ceh-14	dsc-1	M00435_2.00	M02063_2.00	AFD	129	52.4967	2.4573	1.22e-23	2.26e-14	0.00441716
co-occurence of coordinated regulators	Coordinated Regulator	Coordinated Regulator	atf-5	dmd-8	M00593_2.00	M00660_2.00	AFD	168	81.5377	2.0604	1.46e-23	0.00026864	1.19e-22
co-occurence of coordinated regulators	Coordinated Regulator	Coordinated Regulator	lim-7	dsc-1	M01242_2.00	M02063_2.00	AFD	100	33.9093	2.94904	1.83e-23	5.73e-06	0.00029155
co-occurence of coordinated regulators	Coordinated Regulator	Coordinated Regulator	ceh-38	ztf-9	M03716_2.00	M00636_2.00	AFD	122	48.0596	2.53852	2.18e-23	8.88e-05	2.43e-09
co-occurence of coordinated regulators	Coordinated Regulator	Coordinated Regulator	lim-7	dmd-9	M01242_2.00	M00661_2.00	AFD	87	26.5713	3.27421	3.18e-23	2.16e-06	9.37e-07
co-occurence of coordinated regulators	Coordinated Regulator	Coordinated Regulator	fos-1	lim-7	M01144_2.00	M01242_2.00	AFD	102	35.5764	2.86707	4.77e-23	4e-05	1.83e-05
co-occurence of coordinated regulators	Coordinated Regulator	Coordinated Regulator	ceh-23	egl-13	M00671_2.00	M00710_2.00	AFD	178	90.9662	1.95677	8.84e-23	6.77e-08	3.87e-14
co-occurence of coordinated regulators	Coordinated Regulator	Coordinated Regulator	ceh-58	ceh-14	M00676_2.00	M00435_2.00	AFD	151	69.8545	2.16163	1.16e-22	1.62e-07	4.14e-16
co-occurence of coordinated regulators	Coordinated Regulator	Coordinated Regulator	lim-7	ceh-14	M01242_2.00	M00435_2.00	AFD	162	78.8667	2.0541	2.42e-22	8.14e-06	3.15e-17
co-occurence of coordinated regulators	Coordinated Regulator	Coordinated Regulator	atf-5	ceh-38	M00593_2.00	M03716_2.00	AFD	130	55.1272	2.35818	3.07e-22	9.4e-06	1.72e-05
co-occurence of coordinated regulators	Coordinated Regulator	Coordinated Regulator	fos-1	ceh-38	M01144_2.00	M03716_2.00	AFD	118	46.8802	2.51706	3.21e-22	8.47e-07	0.000149568
co-occurence of coordinated regulators	Coordinated Regulator	Coordinated Regulator	ceh-38	lim-7	M03716_2.00	M01242_2.00	AFD	146	67.1286	2.17493	5.25e-22	1.16e-05	4.61e-06
co-occurence of coordinated regulators	Coordinated Regulator	Coordinated Regulator	lim-7	egl-13	M01242_2.00	M00710_2.00	AFD	162	80.076	2.02308	1.22e-21	7.22e-06	1.54e-17
co-occurence of coordinated regulators	Coordinated Regulator	Coordinated Regulator	fos-1	dsc-1	M01144_2.00	M02063_2.00	AFD	79	23.681	3.336	1.62e-21	0.00200642	0.000283277
co-occurence of coordinated regulators	Coordinated Regulator	Coordinated Regulator	egl-13	dmd-8	M00710_2.00	M00660_2.00	AFD	246	156.071	1.57621	3.24e-21	3.4e-13	6.85e-25
co-occurence of coordinated regulators	Coordinated Regulator	Coordinated Regulator	ceh-58	dmd-9	M00676_2.00	M00661_2.00	AFD	78	23.535	3.31421	4.55e-21	7e-08	4.97e-07
co-occurence of coordinated regulators	Coordinated Regulator	Coordinated Regulator	ceh-38	nhr-36	M03716_2.00	M02418_2.00	AFD	133	59.0526	2.25223	4.94e-21	0.000366945	3.36e-06
co-occurence of coordinated regulators	Coordinated Regulator	Coordinated Regulator	ceh-58	ztf-11	M00676_2.00	M00650_2.00	AFD	158	78.1211	2.0225	5.96e-21	8.17e-08	3.75e-20
co-occurence of coordinated regulators	Coordinated Regulator	Coordinated Regulator	ztf-11	dmd-9	M00650_2.00	M00661_2.00	AFD	114	46.0044	2.47802	7.61e-21	4.41e-15	8.8e-06
co-occurence of coordinated regulators	Coordinated Regulator	Coordinated Regulator	dsc-1	egl-13	M02063_2.00	M00710_2.00	AFD	124	53.3017	2.32638	1.43e-20	0.000436149	1.75e-14
co-occurence of coordinated regulators	Coordinated Regulator	Coordinated Regulator	ztf-11	dmd-8	M00650_2.00	M00660_2.00	AFD	258	171.904	1.50083	1.05e-19	1.86e-18	1.39e-23
co-occurence of coordinated regulators	Coordinated Regulator	Coordinated Regulator	ceh-54	dmd-8	M02188_2.00	M00660_2.00	AFD	185	103.244	1.79187	1.76e-19	8.9e-07	3.76e-25
co-occurence of coordinated regulators	Coordinated Regulator	Coordinated Regulator	dsc-1	dmd-9	M02063_2.00	M00661_2.00	AFD	64	17.6869	3.6185	3.59e-19	0.00801361	4.27e-05
co-occurence of coordinated regulators	Coordinated Regulator	Coordinated Regulator	ceh-14	ztf-11	M00435_2.00	M00650_2.00	AFD	221	136.546	1.6185	3.82e-19	8.64e-17	2.11e-21
co-occurence of coordinated regulators	Coordinated Regulator	Coordinated Regulator	ceh-23	ztf-11	M00671_2.00	M00650_2.00	AFD	180	100.195	1.7965	7e-19	3.41e-07	3.83e-21
co-occurence of coordinated regulators	Coordinated Regulator	Coordinated Regulator	dmd-9	dmd-8	M00661_2.00	M00660_2.00	AFD	118	51.7884	2.2785	9.67e-19	1.59e-05	4.74e-20
co-occurence of coordinated regulators	Coordinated Regulator	Coordinated Regulator	lim-7	ztf-11	M01242_2.00	M00650_2.00	AFD	165	88.1998	1.87075	1.39e-18	9.16e-06	1.48e-22
co-occurence of coordinated regulators	Coordinated Regulator	Coordinated Regulator	ceh-14	dmd-9	M00435_2.00	M00661_2.00	AFD	102	41.1363	2.47956	1.74e-18	1.45e-14	4.26e-05
co-occurence of coordinated regulators	Coordinated Regulator	Coordinated Regulator	ceh-58	dmd-8	M00676_2.00	M00660_2.00	AFD	164	87.943	1.86484	2.68e-18	4.44e-07	6.71e-24
co-occurence of coordinated regulators	Coordinated Regulator	Coordinated Regulator	ceh-14	dmd-8	M00435_2.00	M00660_2.00	AFD	235	153.714	1.52881	1.19e-17	1.5e-16	1.35e-25
co-occurence of coordinated regulators	Coordinated Regulator	Coordinated Regulator	ceh-38	egl-13	M03716_2.00	M00710_2.00	AFD	183	105.519	1.73429	1.31e-17	0.000378332	3.89e-14
co-occurence of coordinated regulators	Coordinated Regulator	Coordinated Regulator	ceh-38	ceh-58	M03716_2.00	M00676_2.00	AFD	126	59.4578	2.11915	1.38e-17	0.000352518	2.31e-07
co-occurence of coordinated regulators	Coordinated Regulator	Coordinated Regulator	lim-7	dmd-8	M01242_2.00	M00660_2.00	AFD	175	99.2888	1.76254	2.69e-17	8.66e-05	1.6e-24
co-occurence of coordinated regulators	Coordinated Regulator	Coordinated Regulator	ceh-38	ceh-23	M03716_2.00	M00671_2.00	AFD	147	76.2579	1.92767	3.07e-17	0.000130758	1.81e-07
co-occurence of coordinated regulators	Coordinated Regulator	Coordinated Regulator	dsc-1	ztf-11	M02063_2.00	M00650_2.00	AFD	123	58.7092	2.09507	1.01e-16	0.00371436	1.72e-17
co-occurence of coordinated regulators	Coordinated Regulator	Coordinated Regulator	ceh-38	dmd-9	M03716_2.00	M00661_2.00	AFD	89	35.0138	2.54185	1.14e-16	0.00247958	2.04e-05
co-occurence of coordinated regulators	Coordinated Regulator	Coordinated Regulator	ceh-23	dmd-9	M00671_2.00	M00661_2.00	AFD	81	30.1849	2.68346	1.87e-16	1.48e-05	2.21e-05
co-occurence of coordinated regulators	Coordinated Regulator	Coordinated Regulator	ceh-23	dmd-8	M00671_2.00	M00660_2.00	AFD	188	112.792	1.66679	2.33e-16	1e-06	3.88e-24
co-occurence of coordinated regulators	Coordinated Regulator	Coordinated Regulator	ceh-38	ceh-14	M03716_2.00	M00435_2.00	AFD	176	103.925	1.69353	1.24e-15	0.000855175	1.16e-16
co-occurence of coordinated regulators	Coordinated Regulator	Coordinated Regulator	ceh-38	ztf-11	M03716_2.00	M00650_2.00	AFD	188	116.224	1.61757	5.86e-15	0.00108114	1.51e-19
co-occurence of coordinated regulators	Coordinated Regulator	Coordinated Regulator	dsc-1	dmd-8	M02063_2.00	M00660_2.00	AFD	128	66.0904	1.93674	8.38e-15	0.00584924	3.12e-17
co-occurence of coordinated regulators	Coordinated Regulator	Coordinated Regulator	ceh-38	dsc-1	M03716_2.00	M02063_2.00	AFD	98	44.6834	2.19321	2.75e-14	0.000101662	7.33e-05
co-occurence of coordinated regulators	Coordinated Regulator	Coordinated Regulator	ceh-38	dmd-8	M03716_2.00	M00660_2.00	AFD	196	130.836	1.49806	2.71e-12	7.87e-05	6.62e-27
co-occurence of coordinated regulators	Coordinated Regulator	Coordinated Regulator	ceh-74	ztf-3	M01248_2.00	M00640_2.00	AIA	41	6.76028	6.06484	1.7e-22	0.00783321	0.00125881
co-occurence of coordinated regulators	Coordinated Regulator	Coordinated Regulator	ttx-3	ztf-3	M02085_2.00	M00640_2.00	AIA	42	7.38925	5.68394	4.69e-22	5.93e-05	0.00158251
co-occurence of coordinated regulators	Coordinated Regulator	Coordinated Regulator	ceh-58	ztf-3	M00676_2.00	M00640_2.00	AIA	46	9.7734	4.70665	3.82e-21	0.000765955	0.00543613
co-occurence of coordinated regulators	Coordinated Regulator	Coordinated Regulator	ceh-74	ceh-58	M01248_2.00	M00676_2.00	AIA	39	6.64952	5.86508	9.06e-21	0.029087	0.000744491
co-occurence of coordinated regulators	Coordinated Regulator	Coordinated Regulator	ceh-58	ttx-3	M00676_2.00	M02085_2.00	AIA	40	7.26818	5.50344	2.23e-20	0.000560442	3.97e-06
co-occurence of coordinated regulators	Coordinated Regulator	Coordinated Regulator	ztf-3	ztf-11	M00640_2.00	M00650_2.00	AIA	57	19.1043	2.98362	8.54e-18	0.0123307	1.35e-06
co-occurence of coordinated regulators	Coordinated Regulator	Coordinated Regulator	ceh-74	ttx-3	M01248_2.00	M02085_2.00	AIA	31	5.02742	6.16619	7.68e-17	0.0240425	0.000547102
co-occurence of coordinated regulators	Coordinated Regulator	Coordinated Regulator	ceh-74	ztf-9	M01248_2.00	M00636_2.00	AIA	30	5.37479	5.58161	3.85e-15	0.000814804	0.000119489
co-occurence of coordinated regulators	Coordinated Regulator	Coordinated Regulator	ttx-3	ztf-11	M02085_2.00	M00650_2.00	AIA	46	14.2073	3.23777	8.79e-15	4.7e-05	6.6e-06
co-occurence of coordinated regulators	Coordinated Regulator	Coordinated Regulator	ceh-74	ztf-11	M01248_2.00	M00650_2.00	AIA	43	12.998	3.30821	5.72e-14	0.0136887	9.57e-07
co-occurence of coordinated regulators	Coordinated Regulator	Coordinated Regulator	ttx-3	ztf-9	M02085_2.00	M00636_2.00	AIA	29	5.87486	4.93629	2.73e-13	0.0062276	0.00379467
co-occurence of coordinated regulators	Coordinated Regulator	Coordinated Regulator	ztf-3	ztf-9	M00640_2.00	M00636_2.00	AIA	33	7.89982	4.17731	3.72e-13	0.00102666	0.000158137
co-occurence of coordinated regulators	Coordinated Regulator	Coordinated Regulator	ceh-58	ztf-9	M00676_2.00	M00636_2.00	AIA	31	7.77039	3.9895	8.12e-12	0.002652	0.000570305
co-occurence of coordinated regulators	Coordinated Regulator	Coordinated Regulator	ceh-58	ztf-11	M00676_2.00	M00650_2.00	AIA	48	18.7913	2.55437	1.27e-11	0.0021172	3.78e-06
co-occurence of coordinated regulators	Coordinated Regulator	Coordinated Regulator	ztf-9	ztf-11	M00636_2.00	M00650_2.00	AIA	38	15.189	2.50182	1.34e-08	0.00170702	1.52e-06
co-occurence of coordinated regulators	Coordinated Regulator	Coordinated Regulator	ztf-3	nhr-6	M00640_2.00	M01298_2.00	AIB	125	34.7437	3.59778	2.22e-42	2.11e-09	7.28e-13
co-occurence of coordinated regulators	Coordinated Regulator	Coordinated Regulator	unc-62	ztf-3	M02185_2.00	M00640_2.00	AIB	105	25.8747	4.05802	9.59e-39	9.33e-07	7.44e-11
co-occurence of coordinated regulators	Coordinated Regulator	Coordinated Regulator	ztf-3	ztf-9	M00640_2.00	M00636_2.00	AIB	95	21.4804	4.42264	1.75e-37	3.28e-10	5.22e-12
co-occurence of coordinated regulators	Coordinated Regulator	Coordinated Regulator	ceh-58	ztf-3	M00676_2.00	M00640_2.00	AIB	104	26.5749	3.91347	6.43e-37	1e-06	1.64e-09
co-occurence of coordinated regulators	Coordinated Regulator	Coordinated Regulator	unc-42	ztf-3	M03874_2.00	M00640_2.00	AIB	100	24.4421	4.0913	7.07e-37	3.01e-05	1.68e-08
co-occurence of coordinated regulators	Coordinated Regulator	Coordinated Regulator	ceh-74	ztf-3	M01248_2.00	M00640_2.00	AIB	86	18.3819	4.67852	2.75e-35	6.61e-07	1.68e-09
co-occurence of coordinated regulators	Coordinated Regulator	Coordinated Regulator	tab-1	ztf-3	M00516_2.00	M00640_2.00	AIB	94	22.4583	4.18554	4.13e-35	3.58e-05	5.42e-11
co-occurence of coordinated regulators	Coordinated Regulator	Coordinated Regulator	ceh-58	tab-1	M00676_2.00	M00516_2.00	AIB	92	22.0903	4.16472	4.34e-34	3.49e-05	4.47e-05
co-occurence of coordinated regulators	Coordinated Regulator	Coordinated Regulator	unc-62	nhr-6	M02185_2.00	M01298_2.00	AIB	111	33.274	3.33593	1.66e-33	6.62e-07	7.51e-16
co-occurence of coordinated regulators	Coordinated Regulator	Coordinated Regulator	ztf-9	nhr-6	M00636_2.00	M01298_2.00	AIB	101	27.6231	3.65635	3.54e-33	2.18e-12	5.27e-15
co-occurence of coordinated regulators	Coordinated Regulator	Coordinated Regulator	ztf-3	ztf-11	M00640_2.00	M00650_2.00	AIB	138	51.9465	2.65658	3.55e-33	5.38e-09	2.18e-19
co-occurence of coordinated regulators	Coordinated Regulator	Coordinated Regulator	ceh-58	ztf-9	M00676_2.00	M00636_2.00	AIB	88	21.1285	4.16499	2.04e-32	4.8e-09	6.9e-13
co-occurence of coordinated regulators	Coordinated Regulator	Coordinated Regulator	ceh-58	ceh-62	M00676_2.00	M02187_2.00	AIB	78	16.3391	4.77381	2.83e-32	7.53e-07	0.0110895
co-occurence of coordinated regulators	Coordinated Regulator	Coordinated Regulator	unc-62	tab-1	M02185_2.00	M00516_2.00	AIB	88	21.5083	4.09145	7.62e-32	6.73e-07	1.78e-05
co-occurence of coordinated regulators	Coordinated Regulator	Coordinated Regulator	unc-62	ztf-9	M02185_2.00	M00636_2.00	AIB	86	20.5718	4.18048	1.04e-31	1.83e-07	1.29e-12
co-occurence of coordinated regulators	Coordinated Regulator	Coordinated Regulator	lim-7	ztf-3	M01242_2.00	M00640_2.00	AIB	103	30.0034	3.43295	1.21e-31	4.08e-08	2.21e-11
co-occurence of coordinated regulators	Coordinated Regulator	Coordinated Regulator	ceh-58	unc-62	M00676_2.00	M02185_2.00	AIB	95	25.4508	3.7327	1.38e-31	9.3e-07	1.63e-06
co-occurence of coordinated regulators	Coordinated Regulator	Coordinated Regulator	crh-2	ztf-3	M00603_2.00	M00640_2.00	AIB	93	24.3616	3.81748	1.43e-31	9.5e-05	1.44e-07
co-occurence of coordinated regulators	Coordinated Regulator	Coordinated Regulator	ceh-38	ztf-3	M03716_2.00	M00640_2.00	AIB	118	39.5363	2.9846	1.54e-31	0.000834551	2.09e-10
co-occurence of coordinated regulators	Coordinated Regulator	Coordinated Regulator	maf-1	ztf-3	M01814_2.00	M00640_2.00	AIB	97	26.9692	3.59669	4.51e-31	6.17e-06	3.09e-10
co-occurence of coordinated regulators	Coordinated Regulator	Coordinated Regulator	ceh-74	nhr-6	M01248_2.00	M01298_2.00	AIB	91	23.6385	3.84965	4.55e-31	1.68e-06	8.54e-13
co-occurence of coordinated regulators	Coordinated Regulator	Coordinated Regulator	ceh-58	nhr-6	M00676_2.00	M01298_2.00	AIB	109	34.1745	3.18952	4.73e-31	8.81e-07	2.94e-14
co-occurence of coordinated regulators	Coordinated Regulator	Coordinated Regulator	unc-62	unc-42	M02185_2.00	M03874_2.00	AIB	90	23.4082	3.8448	1.22e-30	1.62e-05	1.28e-06
co-occurence of coordinated regulators	Coordinated Regulator	Coordinated Regulator	lim-7	nhr-6	M01242_2.00	M01298_2.00	AIB	115	38.5834	2.98056	1.79e-30	1.42e-06	2.55e-14
co-occurence of coordinated regulators	Coordinated Regulator	Coordinated Regulator	tab-1	nhr-6	M00516_2.00	M01298_2.00	AIB	99	28.8806	3.4279	3.85e-30	1.5e-05	1.84e-13
co-occurence of coordinated regulators	Coordinated Regulator	Coordinated Regulator	ceh-58	unc-42	M00676_2.00	M03874_2.00	AIB	90	24.0417	3.7435	8.8e-30	1.14e-05	6.24e-06
co-occurence of coordinated regulators	Coordinated Regulator	Coordinated Regulator	tab-1	ztf-9	M00516_2.00	M00636_2.00	AIB	78	17.8555	4.36839	1.02e-29	1.49e-06	8.55e-12
co-occurence of coordinated regulators	Coordinated Regulator	Coordinated Regulator	ceh-18	ztf-3	M00681_2.00	M00640_2.00	AIB	111	37.3513	2.97179	4.85e-29	6.15e-15	1.58e-11
co-occurence of coordinated regulators	Coordinated Regulator	Coordinated Regulator	ceh-74	lim-7	M01248_2.00	M01242_2.00	AIB	82	20.4134	4.01698	6.87e-29	4.93e-08	5.64e-07
co-occurence of coordinated regulators	Coordinated Regulator	Coordinated Regulator	ceh-62	ztf-3	M02187_2.00	M00640_2.00	AIB	74	16.6113	4.4548	1.35e-28	0.00493599	2.22e-11
co-occurence of coordinated regulators	Coordinated Regulator	Coordinated Regulator	ceh-74	unc-62	M01248_2.00	M02185_2.00	AIB	76	17.6043	4.31712	1.47e-28	1.01e-07	2.52e-08
co-occurence of coordinated regulators	Coordinated Regulator	Coordinated Regulator	ceh-48	ztf-3	M01905_2.00	M00640_2.00	AIB	113	39.2587	2.87834	1.85e-28	1.92e-06	1.81e-09
co-occurence of coordinated regulators	Coordinated Regulator	Coordinated Regulator	unc-42	tab-1	M03874_2.00	M00516_2.00	AIB	81	20.3175	3.98672	2.79e-28	1.85e-05	1.23e-05
co-occurence of coordinated regulators	Coordinated Regulator	Coordinated Regulator	maf-1	unc-62	M01814_2.00	M02185_2.00	AIB	91	25.8284	3.52325	3.32e-28	2.66e-08	1.5e-07
co-occurence of coordinated regulators	Coordinated Regulator	Coordinated Regulator	ceh-58	lim-7	M00676_2.00	M01242_2.00	AIB	97	29.5118	3.28682	5.24e-28	4.78e-07	2.03e-06
co-occurence of coordinated regulators	Coordinated Regulator	Coordinated Regulator	unc-62	ceh-18	M02185_2.00	M00681_2.00	AIB	107	35.7713	2.99122	5.41e-28	1.66e-06	2e-14
co-occurence of coordinated regulators	Coordinated Regulator	Coordinated Regulator	unc-42	nhr-6	M03874_2.00	M01298_2.00	AIB	100	31.4318	3.18149	6.66e-28	0.000107513	7.42e-13
co-occurence of coordinated regulators	Coordinated Regulator	Coordinated Regulator	ceh-74	ceh-58	M01248_2.00	M00676_2.00	AIB	76	18.0807	4.20337	7.97e-28	1.23e-07	5.56e-07
co-occurence of coordinated regulators	Coordinated Regulator	Coordinated Regulator	ceh-74	unc-42	M01248_2.00	M03874_2.00	AIB	73	16.6297	4.38975	8.61e-28	9.63e-08	1.11e-05
co-occurence of coordinated regulators	Coordinated Regulator	Coordinated Regulator	ceh-58	ceh-18	M00676_2.00	M00681_2.00	AIB	108	36.7393	2.93963	1.12e-27	6.99e-06	5.79e-12
co-occurence of coordinated regulators	Coordinated Regulator	Coordinated Regulator	ceh-74	ceh-62	M01248_2.00	M02187_2.00	AIB	61	11.3018	5.39736	1.14e-27	9.1e-08	0.012237
co-occurence of coordinated regulators	Coordinated Regulator	Coordinated Regulator	ztf-11	nhr-6	M00650_2.00	M01298_2.00	AIB	148	66.8017	2.21551	1.53e-27	3.56e-23	5.7e-16
co-occurence of coordinated regulators	Coordinated Regulator	Coordinated Regulator	ceh-18	nhr-6	M00681_2.00	M01298_2.00	AIB	124	48.0326	2.58158	1.74e-27	3.24e-14	3.06e-15
co-occurence of coordinated regulators	Coordinated Regulator	Coordinated Regulator	maf-1	ceh-58	M01814_2.00	M00676_2.00	AIB	91	26.5274	3.43042	2.34e-27	1.2e-06	2.02e-05
co-occurence of coordinated regulators	Coordinated Regulator	Coordinated Regulator	ceh-62	unc-42	M02187_2.00	M03874_2.00	AIB	69	15.0279	4.59147	2.64e-27	0.0295174	5.7e-05
co-occurence of coordinated regulators	Coordinated Regulator	Coordinated Regulator	lim-7	tab-1	M01242_2.00	M00516_2.00	AIB	88	24.9402	3.52844	3.38e-27	2.14e-08	0.000125809
co-occurence of coordinated regulators	Coordinated Regulator	Coordinated Regulator	maf-1	nhr-6	M01814_2.00	M01298_2.00	AIB	104	34.6816	2.99871	3.92e-27	5.94e-07	2.15e-11
co-occurence of coordinated regulators	Coordinated Regulator	Coordinated Regulator	unc-62	lim-7	M02185_2.00	M01242_2.00	AIB	94	28.7342	3.27136	7.52e-27	9.54e-05	4.71e-06
co-occurence of coordinated regulators	Coordinated Regulator	Coordinated Regulator	unc-42	ztf-9	M03874_2.00	M00636_2.00	AIB	77	19.4328	3.96237	1.37e-26	5.83e-09	1.65e-10
co-occurence of coordinated regulators	Coordinated Regulator	Coordinated Regulator	lim-7	ztf-9	M01242_2.00	M00636_2.00	AIB	85	23.8543	3.5633	1.9e-26	2.6e-08	8.03e-13
co-occurence of coordinated regulators	Coordinated Regulator	Coordinated Regulator	ceh-74	ztf-9	M01248_2.00	M00636_2.00	AIB	67	14.6146	4.58445	1.97e-26	2.03e-08	2.18e-12
co-occurence of coordinated regulators	Coordinated Regulator	Coordinated Regulator	ceh-62	nhr-6	M02187_2.00	M01298_2.00	AIB	80	21.3616	3.74503	4.05e-26	0.0392433	7e-12
co-occurence of coordinated regulators	Coordinated Regulator	Coordinated Regulator	ceh-74	tab-1	M01248_2.00	M00516_2.00	AIB	68	15.2799	4.45029	4.15e-26	1.89e-10	1.79e-05
co-occurence of coordinated regulators	Coordinated Regulator	Coordinated Regulator	ceh-18	unc-42	M00681_2.00	M03874_2.00	AIB	101	33.7908	2.98898	4.38e-26	2.19e-13	0.000106123
co-occurence of coordinated regulators	Coordinated Regulator	Coordinated Regulator	unc-42	lim-7	M03874_2.00	M01242_2.00	AIB	90	27.1433	3.31573	5.89e-26	5.41e-05	2.86e-05
co-occurence of coordinated regulators	Coordinated Regulator	Coordinated Regulator	ceh-62	lim-7	M02187_2.00	M01242_2.00	AIB	74	18.4471	4.01147	8.57e-26	0.0159259	2.69e-06
co-occurence of coordinated regulators	Coordinated Regulator	Coordinated Regulator	ceh-18	tab-1	M00681_2.00	M00516_2.00	AIB	96	31.0482	3.09197	1.16e-25	6.1e-12	4.13e-06
co-occurence of coordinated regulators	Coordinated Regulator	Coordinated Regulator	ceh-48	unc-62	M01905_2.00	M02185_2.00	AIB	106	37.5981	2.8193	1.45e-25	9.44e-06	3.27e-08
co-occurence of coordinated regulators	Coordinated Regulator	Coordinated Regulator	tab-1	ztf-11	M00516_2.00	M00650_2.00	AIB	114	43.1805	2.64008	1.75e-25	1.15e-05	2.81e-19
co-occurence of coordinated regulators	Coordinated Regulator	Coordinated Regulator	crh-2	nhr-6	M00603_2.00	M01298_2.00	AIB	96	31.3283	3.06432	2.27e-25	0.000105473	4.38e-10
co-occurence of coordinated regulators	Coordinated Regulator	Coordinated Regulator	crh-2	ztf-9	M00603_2.00	M00636_2.00	AIB	75	19.3688	3.8722	3.16e-25	0.00168848	3.47e-10
co-occurence of coordinated regulators	Coordinated Regulator	Coordinated Regulator	ceh-38	nhr-6	M03716_2.00	M01298_2.00	AIB	124	50.8425	2.4389	3.62e-25	0.00399843	2.48e-14
co-occurence of coordinated regulators	Coordinated Regulator	Coordinated Regulator	ceh-18	ztf-9	M00681_2.00	M00636_2.00	AIB	93	29.6963	3.1317	3.92e-25	4.69e-12	6.78e-13
co-occurence of coordinated regulators	Coordinated Regulator	Coordinated Regulator	ceh-48	ceh-74	M01905_2.00	M01248_2.00	AIB	88	26.7104	3.2946	4.16e-25	7.55e-05	5.14e-08
co-occurence of coordinated regulators	Coordinated Regulator	Coordinated Regulator	ceh-62	ztf-9	M02187_2.00	M00636_2.00	AIB	62	13.2069	4.69452	6.53e-25	0.0114331	1.31e-10
co-occurence of coordinated regulators	Coordinated Regulator	Coordinated Regulator	ceh-38	ceh-74	M03716_2.00	M01248_2.00	AIB	88	26.8993	3.27146	6.78e-25	0.000112732	1.38e-07
co-occurence of coordinated regulators	Coordinated Regulator	Coordinated Regulator	unc-62	ztf-11	M02185_2.00	M00650_2.00	AIB	122	49.7492	2.4523	7.6e-25	1.41e-06	1.28e-18
co-occurence of coordinated regulators	Coordinated Regulator	Coordinated Regulator	maf-1	tab-1	M01814_2.00	M00516_2.00	AIB	80	22.4181	3.56854	9.12e-25	1.83e-05	2.56e-05
co-occurence of coordinated regulators	Coordinated Regulator	Coordinated Regulator	ceh-38	unc-62	M03716_2.00	M02185_2.00	AIB	105	37.864	2.77309	1.08e-24	0.00135974	1.63e-07
co-occurence of coordinated regulators	Coordinated Regulator	Coordinated Regulator	ceh-38	ztf-9	M03716_2.00	M00636_2.00	AIB	95	31.4336	3.02225	1.28e-24	0.000520275	1.2e-13
co-occurence of coordinated regulators	Coordinated Regulator	Coordinated Regulator	maf-1	ceh-18	M01814_2.00	M00681_2.00	AIB	104	37.2845	2.78936	1.31e-24	3.96e-06	1.11e-12
co-occurence of coordinated regulators	Coordinated Regulator	Coordinated Regulator	ceh-48	nhr-6	M01905_2.00	M01298_2.00	AIB	122	50.4855	2.41654	2.88e-24	1.22e-05	7.24e-14
co-occurence of coordinated regulators	Coordinated Regulator	Coordinated Regulator	ceh-48	ztf-9	M01905_2.00	M00636_2.00	AIB	94	31.2128	3.01158	3.31e-24	9.28e-06	8.4e-13
co-occurence of coordinated regulators	Coordinated Regulator	Coordinated Regulator	unc-42	ztf-11	M03874_2.00	M00650_2.00	AIB	117	46.9948	2.48964	4.29e-24	0.000133258	2.78e-14
co-occurence of coordinated regulators	Coordinated Regulator	Coordinated Regulator	ztf-9	ztf-11	M00636_2.00	M00650_2.00	AIB	109	41.3004	2.6392	4.48e-24	8.08e-13	1.26e-20
co-occurence of coordinated regulators	Coordinated Regulator	Coordinated Regulator	maf-1	ztf-9	M01814_2.00	M00636_2.00	AIB	77	21.442	3.59108	6.4e-24	2.82e-08	4.6e-13
co-occurence of coordinated regulators	Coordinated Regulator	Coordinated Regulator	ceh-38	ceh-48	M03716_2.00	M01905_2.00	AIB	130	57.4496	2.26285	1.12e-23	0.000275229	2.75e-07
co-occurence of coordinated regulators	Coordinated Regulator	Coordinated Regulator	crh-2	ceh-58	M00603_2.00	M00676_2.00	AIB	81	23.9625	3.38028	1.36e-23	0.000348083	5e-05
co-occurence of coordinated regulators	Coordinated Regulator	Coordinated Regulator	ceh-48	ceh-58	M01905_2.00	M00676_2.00	AIB	104	38.6155	2.69322	2.06e-23	2.33e-05	7.39e-07
co-occurence of coordinated regulators	Coordinated Regulator	Coordinated Regulator	crh-2	ceh-74	M00603_2.00	M01248_2.00	AIB	67	16.5749	4.04226	2.19e-23	0.000638236	0.000158811
co-occurence of coordinated regulators	Coordinated Regulator	Coordinated Regulator	ceh-74	ztf-11	M01248_2.00	M00650_2.00	AIB	99	35.3428	2.80113	2.46e-23	9.77e-07	3.39e-17
co-occurence of coordinated regulators	Coordinated Regulator	Coordinated Regulator	ceh-18	lim-7	M00681_2.00	M01242_2.00	AIB	108	41.4792	2.60372	2.5e-23	9.05e-11	2.6e-07
co-occurence of coordinated regulators	Coordinated Regulator	Coordinated Regulator	lim-7	ztf-11	M01242_2.00	M00650_2.00	AIB	129	57.6874	2.23619	6.07e-23	3.31e-06	3.74e-20
co-occurence of coordinated regulators	Coordinated Regulator	Coordinated Regulator	ceh-62	ceh-18	M02187_2.00	M00681_2.00	AIB	78	22.9649	3.39649	9.21e-23	0.015423	7e-13
co-occurence of coordinated regulators	Coordinated Regulator	Coordinated Regulator	ceh-48	ceh-62	M01905_2.00	M02187_2.00	AIB	80	24.1376	3.31433	9.81e-23	2.95e-07	0.0342194
co-occurence of coordinated regulators	Coordinated Regulator	Coordinated Regulator	ceh-38	ceh-58	M03716_2.00	M00676_2.00	AIB	103	38.8886	2.64859	1.4e-22	0.00241511	1.81e-06
co-occurence of coordinated regulators	Coordinated Regulator	Coordinated Regulator	crh-2	maf-1	M00603_2.00	M01814_2.00	AIB	80	24.3181	3.28973	1.56e-22	0.000287868	3.53e-06
co-occurence of coordinated regulators	Coordinated Regulator	Coordinated Regulator	crh-2	ceh-38	M00603_2.00	M03716_2.00	AIB	98	35.6498	2.74896	1.88e-22	0.000723209	0.00334471
co-occurence of coordinated regulators	Coordinated Regulator	Coordinated Regulator	crh-2	unc-62	M00603_2.00	M02185_2.00	AIB	78	23.3311	3.34317	2.42e-22	0.000522272	2.64e-05
co-occurence of coordinated regulators	Coordinated Regulator	Coordinated Regulator	maf-1	lim-7	M01814_2.00	M01242_2.00	AIB	89	29.9497	2.97165	2.45e-22	1.61e-05	1.09e-06
co-occurence of coordinated regulators	Coordinated Regulator	Coordinated Regulator	ceh-48	tab-1	M01905_2.00	M00516_2.00	AIB	93	32.6337	2.84981	3.3e-22	1.37e-05	5.3e-06
co-occurence of coordinated regulators	Coordinated Regulator	Coordinated Regulator	crh-2	lim-7	M00603_2.00	M01242_2.00	AIB	84	27.054	3.10491	3.79e-22	0.00021981	5.07e-05
co-occurence of coordinated regulators	Coordinated Regulator	Coordinated Regulator	ceh-58	ztf-11	M00676_2.00	M00650_2.00	AIB	119	51.0955	2.32897	4.32e-22	3.68e-06	8.21e-20
co-occurence of coordinated regulators	Coordinated Regulator	Coordinated Regulator	ceh-74	ceh-18	M01248_2.00	M00681_2.00	AIB	81	25.4127	3.18739	5.57e-22	7.46e-09	1e-10
co-occurence of coordinated regulators	Coordinated Regulator	Coordinated Regulator	maf-1	ceh-62	M01814_2.00	M02187_2.00	AIB	65	16.5816	3.92001	5.98e-22	4.32e-06	0.0396504
co-occurence of coordinated regulators	Coordinated Regulator	Coordinated Regulator	ceh-38	lim-7	M03716_2.00	M01242_2.00	AIB	109	43.9057	2.48259	6.28e-22	0.00437576	1.59e-06
co-occurence of coordinated regulators	Coordinated Regulator	Coordinated Regulator	crh-2	unc-42	M00603_2.00	M03874_2.00	AIB	75	22.0394	3.403	7.32e-22	0.0030824	6.23e-05
co-occurence of coordinated regulators	Coordinated Regulator	Coordinated Regulator	maf-1	ceh-74	M01814_2.00	M01248_2.00	AIB	68	18.349	3.70592	1.12e-21	3.5e-06	4.97e-06
co-occurence of coordinated regulators	Coordinated Regulator	Coordinated Regulator	ceh-38	tab-1	M03716_2.00	M00516_2.00	AIB	92	32.8645	2.79937	2.13e-21	8.94e-05	1.03e-05
co-occurence of coordinated regulators	Coordinated Regulator	Coordinated Regulator	crh-2	tab-1	M00603_2.00	M00516_2.00	AIB	71	20.2506	3.50608	2.46e-21	0.000902904	1.92e-05
co-occurence of coordinated regulators	Coordinated Regulator	Coordinated Regulator	ceh-38	unc-42	M03716_2.00	M03874_2.00	AIB	96	35.7676	2.68399	3.57e-21	0.000191508	6.06e-05
co-occurence of coordinated regulators	Coordinated Regulator	Coordinated Regulator	maf-1	unc-42	M01814_2.00	M03874_2.00	AIB	78	24.3984	3.19693	3.63e-21	7.83e-05	0.00181499
co-occurence of coordinated regulators	Coordinated Regulator	Coordinated Regulator	ceh-48	lim-7	M01905_2.00	M01242_2.00	AIB	107	43.5974	2.45428	4.83e-21	2.33e-05	1.63e-06
co-occurence of coordinated regulators	Coordinated Regulator	Coordinated Regulator	ceh-48	unc-42	M01905_2.00	M03874_2.00	AIB	95	35.5164	2.67482	8.23e-21	2.25e-06	1.2e-06
co-occurence of coordinated regulators	Coordinated Regulator	Coordinated Regulator	ceh-18	ztf-11	M00681_2.00	M00650_2.00	AIB	142	71.8153	1.9773	8.52e-21	1.53e-13	6.27e-20
co-occurence of coordinated regulators	Coordinated Regulator	Coordinated Regulator	ceh-38	ceh-62	M03716_2.00	M02187_2.00	AIB	77	24.3083	3.16764	1.24e-20	0.000178502	0.0270163
co-occurence of coordinated regulators	Coordinated Regulator	Coordinated Regulator	ceh-62	ztf-11	M02187_2.00	M00650_2.00	AIB	89	31.9385	2.7866	1.81e-20	0.0476988	3.14e-16
co-occurence of coordinated regulators	Coordinated Regulator	Coordinated Regulator	maf-1	ceh-38	M01814_2.00	M03716_2.00	AIB	99	39.4657	2.50851	7.93e-20	2.56e-06	0.0183443
co-occurence of coordinated regulators	Coordinated Regulator	Coordinated Regulator	crh-2	ceh-48	M00603_2.00	M01905_2.00	AIB	93	35.3995	2.62716	9.03e-20	0.000631585	1.94e-06
co-occurence of coordinated regulators	Coordinated Regulator	Coordinated Regulator	ceh-38	ceh-18	M03716_2.00	M00681_2.00	AIB	119	54.6584	2.17716	1.31e-19	0.000223573	6.1e-15
co-occurence of coordinated regulators	Coordinated Regulator	Coordinated Regulator	ceh-48	ceh-18	M01905_2.00	M00681_2.00	AIB	118	54.2745	2.17413	2.41e-19	3.74e-05	2.99e-11
co-occurence of coordinated regulators	Coordinated Regulator	Coordinated Regulator	maf-1	ceh-48	M01814_2.00	M01905_2.00	AIB	97	39.1885	2.47522	5.98e-19	7.64e-07	8.6e-06
co-occurence of coordinated regulators	Coordinated Regulator	Coordinated Regulator	crh-2	ztf-11	M00603_2.00	M00650_2.00	AIB	106	46.8401	2.26302	3.78e-18	0.000103621	7.57e-17
co-occurence of coordinated regulators	Coordinated Regulator	Coordinated Regulator	crh-2	ceh-18	M00603_2.00	M00681_2.00	AIB	87	33.6796	2.58317	7.42e-18	0.00146841	2.36e-10
co-occurence of coordinated regulators	Coordinated Regulator	Coordinated Regulator	maf-1	ztf-11	M01814_2.00	M00650_2.00	AIB	111	51.8537	2.14064	2.29e-17	1.22e-06	9.55e-20
co-occurence of coordinated regulators	Coordinated Regulator	Coordinated Regulator	ceh-48	ztf-11	M01905_2.00	M00650_2.00	AIB	138	75.4826	1.82824	9.62e-17	1.61e-06	2.56e-20
co-occurence of coordinated regulators	Coordinated Regulator	Coordinated Regulator	ceh-38	ztf-11	M03716_2.00	M00650_2.00	AIB	138	76.0165	1.8154	1.82e-16	0.000418237	1.59e-18
co-occurence of coordinated regulators	Coordinated Regulator	Coordinated Regulator	atf-7	ztf-3	M00595_2.00	M00640_2.00	AIM	132	27.1494	4.86199	6.07e-61	4.08e-16	3.08e-13
co-occurence of coordinated regulators	Coordinated Regulator	Coordinated Regulator	atf-7	daf-16	M00595_2.00	M01989_2.00	AIM	138	30.9788	4.45466	8.64e-60	8.22e-16	3.61e-13
co-occurence of coordinated regulators	Coordinated Regulator	Coordinated Regulator	atf-7	2020-06-01	M00595_2.00	M00599_2.00	AIM	126	24.9698	5.04609	2.74e-59	6.3e-14	5.27e-08
co-occurence of coordinated regulators	Coordinated Regulator	Coordinated Regulator	atf-7	cey-1	M00595_2.00	M01903_2.00	AIM	106	17.3434	6.11182	4.71e-56	6.36e-15	1.4e-05
co-occurence of coordinated regulators	Coordinated Regulator	Coordinated Regulator	daf-16	ztf-3	M01989_2.00	M00640_2.00	AIM	133	30.5735	4.35017	1.01e-55	6.13e-12	4.49e-11
co-occurence of coordinated regulators	Coordinated Regulator	Coordinated Regulator	2020-06-01	ztf-3	M00599_2.00	M00640_2.00	AIM	120	24.6432	4.8695	4.17e-54	6.22e-07	1.43e-10
co-occurence of coordinated regulators	Coordinated Regulator	Coordinated Regulator	2020-06-01	daf-16	M00599_2.00	M01989_2.00	AIM	126	28.1191	4.48095	2.07e-53	3.71e-08	5.28e-13
co-occurence of coordinated regulators	Coordinated Regulator	Coordinated Regulator	atf-7	ceh-58	M00595_2.00	M00676_2.00	AIM	123	26.7046	4.60595	4.04e-53	1.18e-14	2.87e-07
co-occurence of coordinated regulators	Coordinated Regulator	Coordinated Regulator	cey-1	ztf-3	M01903_2.00	M00640_2.00	AIM	101	17.1165	5.90073	1.42e-51	2.61e-07	9.61e-10
co-occurence of coordinated regulators	Coordinated Regulator	Coordinated Regulator	mls-2	daf-16	M03233_2.00	M01989_2.00	AIM	142	38.802	3.6596	2.75e-51	2.96e-06	8.34e-12
co-occurence of coordinated regulators	Coordinated Regulator	Coordinated Regulator	mls-2	ztf-3	M03233_2.00	M00640_2.00	AIM	134	34.0056	3.94053	3.69e-51	4.71e-06	2.18e-11
co-occurence of coordinated regulators	Coordinated Regulator	Coordinated Regulator	ceh-58	daf-16	M00676_2.00	M01989_2.00	AIM	127	30.0726	4.22311	4.79e-51	1.11e-07	2.55e-11
co-occurence of coordinated regulators	Coordinated Regulator	Coordinated Regulator	2020-06-01	cey-1	M00599_2.00	M01903_2.00	AIM	97	15.7424	6.1617	6.71e-51	2.54e-05	4.51e-06
co-occurence of coordinated regulators	Coordinated Regulator	Coordinated Regulator	atf-7	ztf-11	M00595_2.00	M00650_2.00	AIM	161	52.2001	3.08428	7.96e-51	7.14e-15	9.41e-24
co-occurence of coordinated regulators	Coordinated Regulator	Coordinated Regulator	atf-7	ztf-9	M00595_2.00	M00636_2.00	AIM	110	21.5853	5.09607	1.3e-50	2.02e-14	3.04e-07
co-occurence of coordinated regulators	Coordinated Regulator	Coordinated Regulator	ceh-58	lim-7	M00676_2.00	M01242_2.00	AIM	125	29.2679	4.27089	1.46e-50	7.14e-07	3.79e-06
co-occurence of coordinated regulators	Coordinated Regulator	Coordinated Regulator	atf-7	mls-2	M00595_2.00	M03233_2.00	AIM	134	34.4564	3.88898	1.73e-50	3.07e-16	6.78e-07
co-occurence of coordinated regulators	Coordinated Regulator	Coordinated Regulator	2020-06-01	mls-2	M00599_2.00	M03233_2.00	AIM	128	31.2756	4.09264	5e-50	8.65e-07	1.75e-07
co-occurence of coordinated regulators	Coordinated Regulator	Coordinated Regulator	ceh-74	ztf-3	M01248_2.00	M00640_2.00	AIM	102	18.23	5.59518	5.1e-50	2.31e-06	4.93e-13
co-occurence of coordinated regulators	Coordinated Regulator	Coordinated Regulator	2020-06-01	ztf-9	M00599_2.00	M00636_2.00	AIM	105	19.5927	5.35914	5.86e-50	5.67e-06	1.1e-08
co-occurence of coordinated regulators	Coordinated Regulator	Coordinated Regulator	atf-7	unc-86	M00595_2.00	M03312_2.00	AIM	165	56.0174	2.94551	6.11e-50	3.08e-16	1.12e-22
co-occurence of coordinated regulators	Coordinated Regulator	Coordinated Regulator	unc-86	ztf-3	M02244_2.00	M00640_2.00	AIM	112	23.1067	4.84707	1.56e-49	1.45e-11	9.77e-11
co-occurence of coordinated regulators	Coordinated Regulator	Coordinated Regulator	ceh-58	ztf-9	M00676_2.00	M00636_2.00	AIM	107	20.9539	5.10646	4.65e-49	7.7e-08	7.12e-08
co-occurence of coordinated regulators	Coordinated Regulator	Coordinated Regulator	atf-7	unc-86	M00595_2.00	M02244_2.00	AIM	112	23.413	4.78366	5.8e-49	4.7e-14	5.75e-13
co-occurence of coordinated regulators	Coordinated Regulator	Coordinated Regulator	atf-7	ceh-14	M00595_2.00	M00435_2.00	AIM	151	46.6764	3.23504	7.78e-49	2.35e-17	9e-24
co-occurence of coordinated regulators	Coordinated Regulator	Coordinated Regulator	ceh-58	mls-2	M00676_2.00	M03233_2.00	AIM	130	33.4485	3.88658	1.75e-48	2.03e-10	1.14e-08
co-occurence of coordinated regulators	Coordinated Regulator	Coordinated Regulator	cey-1	mls-2	M01903_2.00	M03233_2.00	AIM	108	21.7233	4.97163	1.77e-48	3.99e-06	6.17e-07
co-occurence of coordinated regulators	Coordinated Regulator	Coordinated Regulator	ztf-3	ztf-9	M00640_2.00	M00636_2.00	AIM	107	21.3029	5.02279	2.28e-48	4.47e-09	2.15e-06
co-occurence of coordinated regulators	Coordinated Regulator	Coordinated Regulator	atf-7	lim-7	M00595_2.00	M01242_2.00	AIM	124	30.1498	4.11279	2.92e-48	2.1e-13	1.31e-06
co-occurence of coordinated regulators	Coordinated Regulator	Coordinated Regulator	ceh-58	ztf-3	M00676_2.00	M00640_2.00	AIM	117	26.3552	4.43935	2.92e-48	2.17e-06	3.05e-12
co-occurence of coordinated regulators	Coordinated Regulator	Coordinated Regulator	atf-7	ceh-74	M00595_2.00	M01248_2.00	AIM	100	18.4716	5.41371	1.37e-47	4.56e-14	2.15e-07
co-occurence of coordinated regulators	Coordinated Regulator	Coordinated Regulator	2020-06-01	ceh-58	M00599_2.00	M00676_2.00	AIM	112	24.2394	4.62057	1.82e-47	9.72e-08	9.51e-09
co-occurence of coordinated regulators	Coordinated Regulator	Coordinated Regulator	cey-1	daf-16	M01903_2.00	M01989_2.00	AIM	102	19.5308	5.22252	2.9e-47	3.29e-06	3.59e-11
co-occurence of coordinated regulators	Coordinated Regulator	Coordinated Regulator	ceh-14	ztf-3	M00435_2.00	M00640_2.00	AIM	148	46.0658	3.2128	4.68e-47	1.42e-19	5.48e-11
co-occurence of coordinated regulators	Coordinated Regulator	Coordinated Regulator	cey-1	ceh-74	M01903_2.00	M01248_2.00	AIM	82	11.6456	7.04131	1.51e-46	1.7e-05	9.2e-06
co-occurence of coordinated regulators	Coordinated Regulator	Coordinated Regulator	daf-16	ztf-9	M01989_2.00	M00636_2.00	AIM	111	24.3076	4.56647	1.87e-46	1.14e-10	1.61e-07
co-occurence of coordinated regulators	Coordinated Regulator	Coordinated Regulator	mls-2	ztf-9	M03233_2.00	M00636_2.00	AIM	116	27.0363	4.29052	3e-46	1.43e-06	6.65e-09
co-occurence of coordinated regulators	Coordinated Regulator	Coordinated Regulator	lim-7	daf-16	M01242_2.00	M01989_2.00	AIM	128	33.9523	3.76999	4.73e-46	4.21e-05	2.17e-10
co-occurence of coordinated regulators	Coordinated Regulator	Coordinated Regulator	ceh-14	daf-16	M00435_2.00	M01989_2.00	AIM	155	52.5633	2.94883	2.13e-45	3.72e-21	7.32e-11
co-occurence of coordinated regulators	Coordinated Regulator	Coordinated Regulator	cey-1	ztf-9	M01903_2.00	M00636_2.00	AIM	86	13.6086	6.31954	2.55e-45	4.62e-05	4.42e-06
co-occurence of coordinated regulators	Coordinated Regulator	Coordinated Regulator	2020-06-01	lim-7	M00599_2.00	M01242_2.00	AIM	115	27.3666	4.2022	7.44e-45	6.97e-08	1.6e-06
co-occurence of coordinated regulators	Coordinated Regulator	Coordinated Regulator	lim-7	mls-2	M01242_2.00	M03233_2.00	AIM	132	37.7637	3.49542	3.24e-44	6.6e-06	1.22e-08
co-occurence of coordinated regulators	Coordinated Regulator	Coordinated Regulator	ceh-74	ztf-9	M01248_2.00	M00636_2.00	AIM	87	14.4938	6.00255	3.93e-44	1.05e-05	9.85e-08
co-occurence of coordinated regulators	Coordinated Regulator	Coordinated Regulator	ceh-74	ceh-58	M01248_2.00	M00676_2.00	AIM	95	17.9313	5.298	4.55e-44	7.29e-07	1.49e-07
co-occurence of coordinated regulators	Coordinated Regulator	Coordinated Regulator	ceh-58	unc-86	M00676_2.00	M02244_2.00	AIM	105	22.7281	4.61982	6.27e-44	7.25e-07	5.6e-14
co-occurence of coordinated regulators	Coordinated Regulator	Coordinated Regulator	ceh-74	daf-16	M01248_2.00	M01989_2.00	AIM	101	20.8013	4.85547	6.98e-44	1.64e-07	3.49e-11
co-occurence of coordinated regulators	Coordinated Regulator	Coordinated Regulator	2020-06-01	ceh-74	M00599_2.00	M01248_2.00	AIM	92	16.7665	5.48714	9.66e-44	7.29e-06	1.18e-07
co-occurence of coordinated regulators	Coordinated Regulator	Coordinated Regulator	lim-7	ztf-3	M01242_2.00	M00640_2.00	AIM	118	29.7554	3.96567	9.9e-44	4.29e-05	1.65e-11
co-occurence of coordinated regulators	Coordinated Regulator	Coordinated Regulator	cey-1	ceh-58	M01903_2.00	M00676_2.00	AIM	92	16.8361	5.46445	1.36e-43	1.67e-06	1.37e-06
co-occurence of coordinated regulators	Coordinated Regulator	Coordinated Regulator	cey-1	unc-86	M01903_2.00	M02244_2.00	AIM	87	14.7609	5.89395	1.65e-43	1.34e-05	5.35e-12
co-occurence of coordinated regulators	Coordinated Regulator	Coordinated Regulator	ztf-3	ztf-11	M00640_2.00	M00650_2.00	AIM	151	51.5172	2.93106	2.52e-43	2.52e-11	5.52e-24
co-occurence of coordinated regulators	Coordinated Regulator	Coordinated Regulator	lim-7	ztf-9	M01242_2.00	M00636_2.00	AIM	106	23.6572	4.48067	3.39e-43	2.66e-05	1.03e-06
co-occurence of coordinated regulators	Coordinated Regulator	Coordinated Regulator	unc-86	daf-16	M02244_2.00	M01989_2.00	AIM	111	26.3659	4.20998	4.94e-43	7.26e-13	5.99e-10
co-occurence of coordinated regulators	Coordinated Regulator	Coordinated Regulator	cey-1	lim-7	M01903_2.00	M01242_2.00	AIM	96	19.0082	5.05046	7.95e-43	1.09e-05	0.000289703
co-occurence of coordinated regulators	Coordinated Regulator	Coordinated Regulator	cey-1	ceh-14	M01903_2.00	M00435_2.00	AIM	116	29.4275	3.94189	1.5e-42	1.68e-06	4.74e-20
co-occurence of coordinated regulators	Coordinated Regulator	Coordinated Regulator	unc-86	ztf-3	M03312_2.00	M00640_2.00	AIM	155	55.2845	2.80368	1.55e-42	2.18e-22	4.53e-11
co-occurence of coordinated regulators	Coordinated Regulator	Coordinated Regulator	ceh-74	lim-7	M01248_2.00	M01242_2.00	AIM	98	20.2447	4.84078	2.93e-42	3.13e-06	0.000266995
co-occurence of coordinated regulators	Coordinated Regulator	Coordinated Regulator	2020-06-01	unc-86	M00599_2.00	M02244_2.00	AIM	100	21.2517	4.7055	3.51e-42	3.82e-08	2.38e-13
co-occurence of coordinated regulators	Coordinated Regulator	Coordinated Regulator	unc-86	daf-16	M03312_2.00	M01989_2.00	AIM	164	63.0823	2.59978	6.53e-42	6.52e-23	1.06e-11
co-occurence of coordinated regulators	Coordinated Regulator	Coordinated Regulator	ceh-74	mls-2	M01248_2.00	M03233_2.00	AIM	103	23.1364	4.45187	1.68e-41	5.23e-06	1.18e-07
co-occurence of coordinated regulators	Coordinated Regulator	Coordinated Regulator	unc-86	ztf-9	M02244_2.00	M00636_2.00	AIM	93	18.3711	5.06229	2.2e-41	6.73e-11	3.81e-06
co-occurence of coordinated regulators	Coordinated Regulator	Coordinated Regulator	daf-16	ztf-11	M01989_2.00	M00650_2.00	AIM	158	58.7836	2.68782	2.21e-41	8.18e-11	1.89e-26
co-occurence of coordinated regulators	Coordinated Regulator	Coordinated Regulator	ceh-74	unc-86	M01248_2.00	M02244_2.00	AIM	87	15.7211	5.53396	2.28e-41	5.89e-06	2.54e-10
co-occurence of coordinated regulators	Coordinated Regulator	Coordinated Regulator	2020-06-01	ceh-14	M00599_2.00	M00435_2.00	AIM	135	42.3676	3.1864	5.65e-41	1.14e-06	2.22e-20
co-occurence of coordinated regulators	Coordinated Regulator	Coordinated Regulator	2020-06-01	unc-86	M00599_2.00	M03312_2.00	AIM	147	50.8463	2.89107	6.38e-41	6.27e-07	6.01e-22
co-occurence of coordinated regulators	Coordinated Regulator	Coordinated Regulator	unc-86	lim-7	M02244_2.00	M01242_2.00	AIM	107	25.6604	4.16985	8.71e-41	1.43e-12	8.64e-05
co-occurence of coordinated regulators	Coordinated Regulator	Coordinated Regulator	ceh-58	ceh-14	M00676_2.00	M00435_2.00	AIM	139	45.3111	3.06768	9.85e-41	5.93e-08	1.42e-24
co-occurence of coordinated regulators	Coordinated Regulator	Coordinated Regulator	cey-1	ztf-11	M01903_2.00	M00650_2.00	AIM	119	32.9099	3.61593	4.01e-40	4.12e-06	8.51e-21
co-occurence of coordinated regulators	Coordinated Regulator	Coordinated Regulator	ceh-74	ceh-14	M01248_2.00	M00435_2.00	AIM	116	31.3417	3.70113	7.59e-40	8.53e-07	1.36e-20
co-occurence of coordinated regulators	Coordinated Regulator	Coordinated Regulator	2020-06-01	ztf-11	M00599_2.00	M00650_2.00	AIM	140	47.3814	2.95475	3.01e-39	7.82e-07	2.68e-23
co-occurence of coordinated regulators	Coordinated Regulator	Coordinated Regulator	mls-2	ztf-11	M03233_2.00	M00650_2.00	AIM	162	65.3825	2.47773	2.68e-38	6.23e-07	6.01e-26
co-occurence of coordinated regulators	Coordinated Regulator	Coordinated Regulator	ceh-74	ztf-11	M01248_2.00	M00650_2.00	AIM	120	35.0507	3.42361	3.68e-38	9.96e-07	1.21e-22
co-occurence of coordinated regulators	Coordinated Regulator	Coordinated Regulator	ceh-58	unc-86	M00676_2.00	M03312_2.00	AIM	148	54.3788	2.72165	4e-38	2.51e-07	3.47e-26
co-occurence of coordinated regulators	Coordinated Regulator	Coordinated Regulator	cey-1	unc-86	M01903_2.00	M03312_2.00	AIM	120	35.3166	3.39784	7.84e-38	4.32e-06	5.47e-21
co-occurence of coordinated regulators	Coordinated Regulator	Coordinated Regulator	lim-7	ceh-14	M01242_2.00	M00435_2.00	AIM	143	51.1568	2.79533	1.32e-37	1.68e-05	2.07e-21
co-occurence of coordinated regulators	Coordinated Regulator	Coordinated Regulator	ceh-74	unc-86	M01248_2.00	M03312_2.00	AIM	123	37.6139	3.27007	2.39e-37	5.24e-07	1.66e-23
co-occurence of coordinated regulators	Coordinated Regulator	Coordinated Regulator	ceh-14	mls-2	M00435_2.00	M03233_2.00	AIM	152	58.4639	2.5999	3.37e-37	2.55e-22	1.88e-07
co-occurence of coordinated regulators	Coordinated Regulator	Coordinated Regulator	unc-86	mls-2	M02244_2.00	M03233_2.00	AIM	109	29.3256	3.71688	4.48e-37	2.95e-12	6.76e-07
co-occurence of coordinated regulators	Coordinated Regulator	Coordinated Regulator	lim-7	ztf-11	M01242_2.00	M00650_2.00	AIM	150	57.2107	2.62189	6.64e-37	5.46e-05	4.37e-24
co-occurence of coordinated regulators	Coordinated Regulator	Coordinated Regulator	ceh-14	ztf-11	M00435_2.00	M00650_2.00	AIM	185	88.5706	2.08873	1.16e-36	1.23e-21	3.66e-25
co-occurence of coordinated regulators	Coordinated Regulator	Coordinated Regulator	ceh-58	ztf-11	M00676_2.00	M00650_2.00	AIM	141	50.6732	2.78254	1.26e-36	5.76e-08	9.92e-25
co-occurence of coordinated regulators	Coordinated Regulator	Coordinated Regulator	ceh-48	ztf-3	M01905_2.00	M00640_2.00	AIM	124	38.9342	3.18486	1.44e-36	0.00179971	5.57e-12
co-occurence of coordinated regulators	Coordinated Regulator	Coordinated Regulator	unc-86	mls-2	M03312_2.00	M03233_2.00	AIM	165	70.1638	2.35164	2.08e-36	8.91e-25	5.66e-07
co-occurence of coordinated regulators	Coordinated Regulator	Coordinated Regulator	cey-1	ceh-48	M01903_2.00	M01905_2.00	AIM	100	24.8717	4.02063	2.69e-36	2.1e-05	0.00737355
co-occurence of coordinated regulators	Coordinated Regulator	Coordinated Regulator	ceh-14	ztf-9	M00435_2.00	M00636_2.00	AIM	120	36.6248	3.27647	2.91e-36	1.49e-19	3.61e-08
co-occurence of coordinated regulators	Coordinated Regulator	Coordinated Regulator	cey-1	ceh-38	M01903_2.00	M03716_2.00	AIM	100	25.0477	3.99239	4.86e-36	1.32e-06	0.000934411
co-occurence of coordinated regulators	Coordinated Regulator	Coordinated Regulator	ztf-9	ztf-11	M00636_2.00	M00650_2.00	AIM	126	40.959	3.07625	8.78e-36	7.05e-08	1.47e-21
co-occurence of coordinated regulators	Coordinated Regulator	Coordinated Regulator	unc-86	ztf-9	M03312_2.00	M00636_2.00	AIM	130	43.9542	2.95762	1.74e-35	9.61e-23	1.51e-08
co-occurence of coordinated regulators	Coordinated Regulator	Coordinated Regulator	unc-86	lim-7	M03312_2.00	M01242_2.00	AIM	153	61.3943	2.49209	2.71e-35	1.58e-26	5.54e-05
co-occurence of coordinated regulators	Coordinated Regulator	Coordinated Regulator	atf-7	ceh-48	M00595_2.00	M01905_2.00	AIM	123	39.4503	3.11784	2.96e-35	7.93e-14	0.000163358
co-occurence of coordinated regulators	Coordinated Regulator	Coordinated Regulator	unc-86	ceh-14	M03312_2.00	M00435_2.00	AIM	189	95.0476	1.98848	5.99e-35	1.23e-24	3.12e-22
co-occurence of coordinated regulators	Coordinated Regulator	Coordinated Regulator	ceh-38	ztf-3	M03716_2.00	M00640_2.00	AIM	122	39.2096	3.11148	8.52e-35	0.0117432	8.01e-11
co-occurence of coordinated regulators	Coordinated Regulator	Coordinated Regulator	atf-7	ceh-38	M00595_2.00	M03716_2.00	AIM	122	39.7294	3.07078	3.15e-34	2.88e-15	0.000410438
co-occurence of coordinated regulators	Coordinated Regulator	Coordinated Regulator	unc-86	ztf-11	M03312_2.00	M00650_2.00	AIM	197	106.296	1.85332	3.07e-33	1.94e-24	5.72e-26
co-occurence of coordinated regulators	Coordinated Regulator	Coordinated Regulator	ceh-38	ceh-58	M03716_2.00	M00676_2.00	AIM	118	38.5672	3.05959	1.22e-32	0.000319295	7.52e-06
co-occurence of coordinated regulators	Coordinated Regulator	Coordinated Regulator	ceh-48	ceh-74	M01905_2.00	M01248_2.00	AIM	98	26.4897	3.69956	1.72e-32	0.00146996	4.86e-06
co-occurence of coordinated regulators	Coordinated Regulator	Coordinated Regulator	unc-86	unc-86	M03312_2.00	M02244_2.00	AIM	131	47.6761	2.74771	1.73e-32	1.53e-24	5.98e-14
co-occurence of coordinated regulators	Coordinated Regulator	Coordinated Regulator	ceh-48	ceh-58	M01905_2.00	M00676_2.00	AIM	117	38.2963	3.05512	3.14e-32	7.99e-05	1.05e-05
co-occurence of coordinated regulators	Coordinated Regulator	Coordinated Regulator	unc-86	ztf-11	M02244_2.00	M00650_2.00	AIM	126	44.4273	2.8361	3.38e-32	5.78e-14	7.47e-24
co-occurence of coordinated regulators	Coordinated Regulator	Coordinated Regulator	unc-86	ceh-14	M02244_2.00	M00435_2.00	AIM	119	39.7261	2.99551	4.07e-32	2.3e-13	2.52e-22
co-occurence of coordinated regulators	Coordinated Regulator	Coordinated Regulator	2020-06-01	ceh-48	M00599_2.00	M01905_2.00	AIM	112	35.8086	3.12774	2.04e-31	2.12e-05	0.00123204
co-occurence of coordinated regulators	Coordinated Regulator	Coordinated Regulator	ceh-38	daf-16	M03716_2.00	M01989_2.00	AIM	125	44.7401	2.79392	3.26e-31	0.0156512	8.55e-13
co-occurence of coordinated regulators	Coordinated Regulator	Coordinated Regulator	ceh-48	daf-16	M01905_2.00	M01989_2.00	AIM	124	44.4258	2.79117	7.65e-31	0.00481813	4.61e-11
co-occurence of coordinated regulators	Coordinated Regulator	Coordinated Regulator	ceh-38	ceh-74	M03716_2.00	M01248_2.00	AIM	96	26.677	3.5986	9e-31	9.34e-05	2.1e-06
co-occurence of coordinated regulators	Coordinated Regulator	Coordinated Regulator	2020-06-01	ceh-38	M00599_2.00	M03716_2.00	AIM	111	36.0618	3.07805	1.87e-30	3.45e-07	0.000364621
co-occurence of coordinated regulators	Coordinated Regulator	Coordinated Regulator	ceh-48	mls-2	M01905_2.00	M03233_2.00	AIM	128	49.413	2.59041	6.39e-29	0.0157913	6.87e-07
co-occurence of coordinated regulators	Coordinated Regulator	Coordinated Regulator	ceh-38	mls-2	M03716_2.00	M03233_2.00	AIM	128	49.7624	2.57222	1.28e-28	0.00565055	1.48e-06
co-occurence of coordinated regulators	Coordinated Regulator	Coordinated Regulator	ceh-38	unc-86	M03716_2.00	M02244_2.00	AIM	104	33.8135	3.0757	4.33e-28	0.000730973	2.05e-13
co-occurence of coordinated regulators	Coordinated Regulator	Coordinated Regulator	ceh-38	lim-7	M03716_2.00	M01242_2.00	AIM	118	43.5429	2.70997	9.77e-28	0.0180861	0.000921131
co-occurence of coordinated regulators	Coordinated Regulator	Coordinated Regulator	ceh-38	ceh-48	M03716_2.00	M01905_2.00	AIM	136	56.9748	2.38702	1.04e-27	0.000558686	0.0013166
co-occurence of coordinated regulators	Coordinated Regulator	Coordinated Regulator	ceh-48	unc-86	M01905_2.00	M02244_2.00	AIM	103	33.576	3.06767	1.13e-27	9.31e-05	5.15e-13
co-occurence of coordinated regulators	Coordinated Regulator	Coordinated Regulator	ceh-48	ztf-9	M01905_2.00	M00636_2.00	AIM	97	30.9549	3.1336	1.82e-26	0.00864708	9.45e-07
co-occurence of coordinated regulators	Coordinated Regulator	Coordinated Regulator	ceh-48	lim-7	M01905_2.00	M01242_2.00	AIM	115	43.2371	2.65976	4.04e-26	0.00493489	3.85e-05
co-occurence of coordinated regulators	Coordinated Regulator	Coordinated Regulator	ceh-48	ceh-14	M01905_2.00	M00435_2.00	AIM	144	66.9374	2.15126	3.58e-25	0.0063001	2.23e-19
co-occurence of coordinated regulators	Coordinated Regulator	Coordinated Regulator	ceh-38	ztf-9	M03716_2.00	M00636_2.00	AIM	95	31.1738	3.04743	6.25e-25	0.00453396	2.51e-07
co-occurence of coordinated regulators	Coordinated Regulator	Coordinated Regulator	ceh-38	ceh-14	M03716_2.00	M00435_2.00	AIM	142	67.4108	2.10649	1.07e-23	0.00373387	2.68e-18
co-occurence of coordinated regulators	Coordinated Regulator	Coordinated Regulator	ceh-48	unc-86	M01905_2.00	M03312_2.00	AIM	152	80.333	1.89212	3.75e-21	0.0214564	9.88e-20
co-occurence of coordinated regulators	Coordinated Regulator	Coordinated Regulator	ceh-38	unc-86	M03716_2.00	M03312_2.00	AIM	152	80.9012	1.87884	8e-21	0.00758922	8.23e-21
co-occurence of coordinated regulators	Coordinated Regulator	Coordinated Regulator	ceh-48	ztf-11	M01905_2.00	M00650_2.00	AIM	145	74.8588	1.93698	1.17e-20	0.00360127	3.88e-24
co-occurence of coordinated regulators	Coordinated Regulator	Coordinated Regulator	ceh-38	ztf-11	M03716_2.00	M00650_2.00	AIM	144	75.3882	1.91011	7.9e-20	0.00256729	2.99e-24
co-occurence of coordinated regulators	Coordinated Regulator	Coordinated Regulator	2020-06-01	fos-1	M00599_2.00	M01144_2.00	AIN	86	12.5023	6.87871	6.96e-52	0.000219775	0.0232686
co-occurence of coordinated regulators	Coordinated Regulator	Coordinated Regulator	ceh-5	ttx-3	M02179_2.00	M02085_2.00	AIN	67	10.1577	6.59597	1.41e-37	0.000407858	0.000733084
co-occurence of coordinated regulators	Coordinated Regulator	Coordinated Regulator	fos-1	ttx-3	M01144_2.00	M02085_2.00	AIN	65	10.1092	6.4298	1.17e-35	0.00353472	0.0198942
co-occurence of coordinated regulators	Coordinated Regulator	Coordinated Regulator	2020-06-01	ttx-3	M00599_2.00	M02085_2.00	AIN	68	11.9885	5.6721	3.56e-34	0.00196694	0.00915618
co-occurence of coordinated regulators	Coordinated Regulator	Coordinated Regulator	ttx-3	ztf-3	M02085_2.00	M00640_2.00	AIN	70	13.035	5.37017	7.63e-34	0.0092428	2.74e-06
co-occurence of coordinated regulators	Coordinated Regulator	Coordinated Regulator	fos-1	ztf-3	M01144_2.00	M00640_2.00	AIN	69	13.5936	5.0759	8.63e-32	0.000923603	9.64e-07
co-occurence of coordinated regulators	Coordinated Regulator	Coordinated Regulator	2020-06-01	ztf-3	M00599_2.00	M00640_2.00	AIN	74	16.1207	4.59036	1.18e-31	0.000376186	1.12e-05
co-occurence of coordinated regulators	Coordinated Regulator	Coordinated Regulator	ceh-58	ttx-3	M00676_2.00	M02085_2.00	AIN	67	12.8214	5.22564	1.77e-31	5.59e-05	0.0111513
co-occurence of coordinated regulators	Coordinated Regulator	Coordinated Regulator	ceh-58	ztf-3	M00676_2.00	M00640_2.00	AIN	75	17.2407	4.35017	1.21e-30	9.86e-05	1.71e-06
co-occurence of coordinated regulators	Coordinated Regulator	Coordinated Regulator	ceh-18	ztf-3	M00681_2.00	M00640_2.00	AIN	87	24.232	3.59029	1.56e-30	5.83e-08	1.23e-06
co-occurence of coordinated regulators	Coordinated Regulator	Coordinated Regulator	fos-1	ceh-58	M01144_2.00	M00676_2.00	AIN	67	13.3709	5.01087	2.09e-30	0.0011671	0.000134104
co-occurence of coordinated regulators	Coordinated Regulator	Coordinated Regulator	ceh-58	ceh-18	M00676_2.00	M00681_2.00	AIN	86	23.835	3.60814	3.1e-30	4.1e-05	1.57e-07
co-occurence of coordinated regulators	Coordinated Regulator	Coordinated Regulator	fos-1	ceh-74	M01144_2.00	M01248_2.00	AIN	57	9.2487	6.16303	6.72e-30	0.000678641	0.000401945
co-occurence of coordinated regulators	Coordinated Regulator	Coordinated Regulator	ceh-5	ztf-3	M02179_2.00	M00640_2.00	AIN	67	13.6589	4.90522	7.3e-30	0.00123099	9.67e-06
co-occurence of coordinated regulators	Coordinated Regulator	Coordinated Regulator	ceh-74	ttx-3	M01248_2.00	M02085_2.00	AIN	56	8.86859	6.31442	7.35e-30	0.00356995	0.0303849
co-occurence of coordinated regulators	Coordinated Regulator	Coordinated Regulator	ceh-74	ztf-3	M01248_2.00	M00640_2.00	AIN	63	11.9254	5.28283	1.27e-29	0.000377347	1.54e-07
co-occurence of coordinated regulators	Coordinated Regulator	Coordinated Regulator	ceh-18	ttx-3	M00681_2.00	M02085_2.00	AIN	74	18.0206	4.1064	1.46e-28	4.53e-06	0.0105524
co-occurence of coordinated regulators	Coordinated Regulator	Coordinated Regulator	2020-06-01	ceh-5	M00599_2.00	M02179_2.00	AIN	63	12.5624	5.01498	2.25e-28	0.000263386	0.00445976
co-occurence of coordinated regulators	Coordinated Regulator	Coordinated Regulator	fos-1	ceh-18	M01144_2.00	M00681_2.00	AIN	75	18.793	3.99085	3.11e-28	0.00217079	0.000291007
co-occurence of coordinated regulators	Coordinated Regulator	Coordinated Regulator	2020-06-01	ceh-74	M00599_2.00	M01248_2.00	AIN	59	10.9681	5.37925	6.02e-28	1.49e-05	0.000437368
co-occurence of coordinated regulators	Coordinated Regulator	Coordinated Regulator	fos-1	ceh-5	M01144_2.00	M02179_2.00	AIN	58	10.5931	5.47527	8.07e-28	0.000613176	0.00278628
co-occurence of coordinated regulators	Coordinated Regulator	Coordinated Regulator	ceh-58	ceh-5	M00676_2.00	M02179_2.00	AIN	64	13.4351	4.76363	1.22e-27	9.01e-06	0.000193671
co-occurence of coordinated regulators	Coordinated Regulator	Coordinated Regulator	ceh-74	ceh-58	M01248_2.00	M00676_2.00	AIN	60	11.7301	5.11507	2.55e-27	5.11e-07	0.000167134
co-occurence of coordinated regulators	Coordinated Regulator	Coordinated Regulator	2020-06-01	ceh-58	M00599_2.00	M00676_2.00	AIN	68	15.8566	4.28843	6.05e-27	0.000700013	0.000129142
co-occurence of coordinated regulators	Coordinated Regulator	Coordinated Regulator	ceh-74	ceh-18	M01248_2.00	M00681_2.00	AIN	69	16.4867	4.18518	8.8e-27	0.00037382	3.72e-05
co-occurence of coordinated regulators	Coordinated Regulator	Coordinated Regulator	2020-06-01	ceh-18	M00599_2.00	M00681_2.00	AIN	79	22.2867	3.54472	1.21e-26	0.000407114	0.000140083
co-occurence of coordinated regulators	Coordinated Regulator	Coordinated Regulator	ztf-3	ztf-9	M00640_2.00	M00636_2.00	AIN	63	13.9356	4.52078	6.4e-26	4.24e-05	2.83e-08
co-occurence of coordinated regulators	Coordinated Regulator	Coordinated Regulator	fos-1	ztf-11	M01144_2.00	M00650_2.00	AIN	84	26.1365	3.2139	8.28e-26	0.00422135	4.22e-12
co-occurence of coordinated regulators	Coordinated Regulator	Coordinated Regulator	ceh-5	ceh-18	M02179_2.00	M00681_2.00	AIN	72	18.8832	3.81291	1.09e-25	0.00213871	2.15e-06
co-occurence of coordinated regulators	Coordinated Regulator	Coordinated Regulator	fos-1	ztf-9	M01144_2.00	M00636_2.00	AIN	56	10.8077	5.18149	1.33e-25	0.00749934	3.86e-05
co-occurence of coordinated regulators	Coordinated Regulator	Coordinated Regulator	ceh-74	ceh-5	M01248_2.00	M02179_2.00	AIN	52	9.2931	5.59555	3.75e-25	0.000962699	1.9e-05
co-occurence of coordinated regulators	Coordinated Regulator	Coordinated Regulator	ttx-3	ztf-11	M02085_2.00	M00650_2.00	AIN	81	25.0623	3.23195	8.57e-25	0.00230274	2.18e-13
co-occurence of coordinated regulators	Coordinated Regulator	Coordinated Regulator	ceh-74	ztf-9	M01248_2.00	M00636_2.00	AIN	52	9.48138	5.48443	9.36e-25	8.97e-05	3.24e-07
co-occurence of coordinated regulators	Coordinated Regulator	Coordinated Regulator	ztf-3	ztf-11	M00640_2.00	M00650_2.00	AIN	93	33.7008	2.75957	1.79e-24	1.5e-06	5.67e-14
co-occurence of coordinated regulators	Coordinated Regulator	Coordinated Regulator	fos-1	nhr-67	M01144_2.00	M02408_2.00	AIN	57	12.2756	4.64337	9.33e-24	0.000663401	9.63e-07
co-occurence of coordinated regulators	Coordinated Regulator	Coordinated Regulator	2020-06-01	ztf-9	M00599_2.00	M00636_2.00	AIN	58	12.8169	4.52528	1.16e-23	0.00317155	3.28e-07
co-occurence of coordinated regulators	Coordinated Regulator	Coordinated Regulator	2020-06-01	ztf-11	M00599_2.00	M00650_2.00	AIN	88	30.9953	2.83914	1.49e-23	0.00343794	3.72e-12
co-occurence of coordinated regulators	Coordinated Regulator	Coordinated Regulator	ceh-58	ztf-9	M00676_2.00	M00636_2.00	AIN	59	13.7073	4.30427	5.03e-23	0.00120083	1.66e-05
co-occurence of coordinated regulators	Coordinated Regulator	Coordinated Regulator	ceh-74	nhr-67	M01248_2.00	M02408_2.00	AIN	52	10.7691	4.82862	2.88e-22	4.12e-05	7.55e-07
co-occurence of coordinated regulators	Coordinated Regulator	Coordinated Regulator	ttx-3	nhr-67	M02085_2.00	M02408_2.00	AIN	54	11.7711	4.58752	3.67e-22	0.0137766	5.98e-06
co-occurence of coordinated regulators	Coordinated Regulator	Coordinated Regulator	2020-06-01	nhr-67	M00599_2.00	M02408_2.00	AIN	59	14.5577	4.05285	9.85e-22	0.00140598	2.29e-06
co-occurence of coordinated regulators	Coordinated Regulator	Coordinated Regulator	ceh-18	ztf-9	M00681_2.00	M00636_2.00	AIN	67	19.2658	3.47767	2.08e-21	2.68e-05	1.34e-06
co-occurence of coordinated regulators	Coordinated Regulator	Coordinated Regulator	ceh-5	ztf-9	M02179_2.00	M00636_2.00	AIN	51	10.8596	4.69631	2.75e-21	0.000254264	1.11e-07
co-occurence of coordinated regulators	Coordinated Regulator	Coordinated Regulator	ceh-74	ztf-11	M01248_2.00	M00650_2.00	AIN	72	22.929	3.14013	1.01e-20	0.000314707	1.79e-16
co-occurence of coordinated regulators	Coordinated Regulator	Coordinated Regulator	ceh-58	nhr-67	M00676_2.00	M02408_2.00	AIN	59	15.569	3.78958	2.58e-20	1.04e-05	9.97e-09
co-occurence of coordinated regulators	Coordinated Regulator	Coordinated Regulator	ceh-18	ztf-11	M00681_2.00	M00650_2.00	AIN	102	46.5909	2.18927	9.09e-20	4.18e-06	2.79e-15
co-occurence of coordinated regulators	Coordinated Regulator	Coordinated Regulator	ceh-5	ztf-11	M02179_2.00	M00650_2.00	AIN	75	26.262	2.85584	2.49e-19	0.00225221	4.15e-15
co-occurence of coordinated regulators	Coordinated Regulator	Coordinated Regulator	ztf-3	nhr-67	M00640_2.00	M02408_2.00	AIN	58	15.8284	3.66431	3.03e-19	3.38e-08	5.38e-08
co-occurence of coordinated regulators	Coordinated Regulator	Coordinated Regulator	ceh-58	ztf-11	M00676_2.00	M00650_2.00	AIN	84	33.1487	2.53404	6.6e-19	5.72e-05	2.31e-16
co-occurence of coordinated regulators	Coordinated Regulator	Coordinated Regulator	ztf-9	ztf-11	M00636_2.00	M00650_2.00	AIN	75	26.794	2.79913	8.03e-19	7.84e-06	9.31e-14
co-occurence of coordinated regulators	Coordinated Regulator	Coordinated Regulator	ztf-9	nhr-67	M00636_2.00	M02408_2.00	AIN	51	12.5844	4.05263	1.47e-18	6e-07	1.05e-05
co-occurence of coordinated regulators	Coordinated Regulator	Coordinated Regulator	ceh-18	nhr-67	M00681_2.00	M02408_2.00	AIN	66	21.8825	3.01612	8.52e-18	2.91e-05	1.78e-07
co-occurence of coordinated regulators	Coordinated Regulator	Coordinated Regulator	ceh-5	nhr-67	M02179_2.00	M02408_2.00	AIN	49	12.3345	3.97259	1.92e-17	0.00386284	2.78e-06
co-occurence of coordinated regulators	Coordinated Regulator	Coordinated Regulator	ztf-11	nhr-67	M00650_2.00	M02408_2.00	AIN	71	30.4332	2.33298	1.87e-13	1.45e-11	4.77e-07
co-occurence of coordinated regulators	Coordinated Regulator	Coordinated Regulator	ttx-3	ceh-10	M02085_2.00	M00287_2.00	AIY	79	16.8361	4.6923	6.01e-34	0.00213508	1.23e-07
co-occurence of coordinated regulators	Coordinated Regulator	Coordinated Regulator	ceh-23	ttx-3	M00671_2.00	M02085_2.00	AIY	75	18.539	4.04553	8e-28	0.000319999	0.00030743
co-occurence of coordinated regulators	Coordinated Regulator	Coordinated Regulator	ttx-3	ztf-3	M02085_2.00	M00640_2.00	AIY	67	14.6955	4.55923	2.09e-27	0.000197378	2.58e-06
co-occurence of coordinated regulators	Coordinated Regulator	Coordinated Regulator	ceh-23	ceh-10	M00671_2.00	M00287_2.00	AIY	91	28.5603	3.18624	3.53e-27	0.000546339	2.78e-06
co-occurence of coordinated regulators	Coordinated Regulator	Coordinated Regulator	hlh-16	ztf-3	M00589_2.00	M00640_2.00	AIY	82	23.1866	3.53652	6.76e-27	0.000419314	5.11e-07
co-occurence of coordinated regulators	Coordinated Regulator	Coordinated Regulator	ceh-58	ztf-3	M00676_2.00	M00640_2.00	AIY	75	19.437	3.85862	1.56e-26	0.00233405	2.24e-05
co-occurence of coordinated regulators	Coordinated Regulator	Coordinated Regulator	ceh-58	ttx-3	M00676_2.00	M02085_2.00	AIY	64	14.4547	4.42763	2.34e-25	0.00624511	0.000155612
co-occurence of coordinated regulators	Coordinated Regulator	Coordinated Regulator	ceh-58	ceh-23	M00676_2.00	M00671_2.00	AIY	82	24.5206	3.34413	2.92e-25	0.00234193	9.02e-05
co-occurence of coordinated regulators	Coordinated Regulator	Coordinated Regulator	hlh-16	ttx-3	M00589_2.00	M02085_2.00	AIY	69	17.2432	4.00158	5.13e-25	2.36e-05	0.00183782
co-occurence of coordinated regulators	Coordinated Regulator	Coordinated Regulator	ceh-10--ttx-3	ztf-3	OH2007_CEH-10_TTX-3	M00640_2.00	AIY	91	30.6006	2.9738	5.69e-25	1.24e-21	6.02e-07
co-occurence of coordinated regulators	Coordinated Regulator	Coordinated Regulator	ceh-74	lin-39	M01248_2.00	M08211_2.00	AIY	68	16.7467	4.06051	5.73e-25	0.00357372	1.08e-05
co-occurence of coordinated regulators	Coordinated Regulator	Coordinated Regulator	ceh-23	ztf-3	M00671_2.00	M00640_2.00	AIY	82	24.929	3.28934	8.76e-25	0.0021089	7.32e-07
co-occurence of coordinated regulators	Coordinated Regulator	Coordinated Regulator	ceh-10--ttx-3	lin-39	OH2007_CEH-10_TTX-3	M08211_2.00	AIY	101	38.1163	2.64979	1.37e-24	4.06e-20	2.01e-05
co-occurence of coordinated regulators	Coordinated Regulator	Coordinated Regulator	ceh-10--ttx-3	ttx-3	OH2007_CEH-10_TTX-3	M02085_2.00	AIY	78	22.7567	3.42756	1.82e-24	3.75e-18	0.00205455
co-occurence of coordinated regulators	Coordinated Regulator	Coordinated Regulator	lin-39	ztf-3	M08211_2.00	M00640_2.00	AIY	81	24.6141	3.2908	1.97e-24	7.2e-06	7.91e-06
co-occurence of coordinated regulators	Coordinated Regulator	Coordinated Regulator	ceh-10--ttx-3	ceh-10	OH2007_CEH-10_TTX-3	M00287_2.00	AIY	96	35.0581	2.73832	5.04e-24	1.04e-19	2.35e-05
co-occurence of coordinated regulators	Coordinated Regulator	Coordinated Regulator	hlh-16	ceh-10	M00589_2.00	M00287_2.00	AIY	83	26.5641	3.12451	1.17e-23	0.00033455	1.1e-05
co-occurence of coordinated regulators	Coordinated Regulator	Coordinated Regulator	lin-39	ttx-3	M08211_2.00	M02085_2.00	AIY	69	18.3048	3.76951	1.55e-23	0.0012006	0.000328642
co-occurence of coordinated regulators	Coordinated Regulator	Coordinated Regulator	ceh-10--ttx-3	ceh-23	OH2007_CEH-10_TTX-3	M00671_2.00	AIY	100	38.604	2.59041	1.75e-23	1.35e-21	0.0007142
co-occurence of coordinated regulators	Coordinated Regulator	Coordinated Regulator	hlh-16	ceh-10--ttx-3	M00589_2.00	OH2007_CEH-10_TTX-3	AIY	95	35.9058	2.64581	1.4e-22	4.12e-05	1.43e-18
co-occurence of coordinated regulators	Coordinated Regulator	Coordinated Regulator	ceh-23	lin-39	M00671_2.00	M08211_2.00	AIY	88	31.0517	2.83398	1.79e-22	0.000512669	4.34e-05
co-occurence of coordinated regulators	Coordinated Regulator	Coordinated Regulator	ceh-10	ztf-3	M00287_2.00	M00640_2.00	AIY	75	22.6392	3.31284	1.81e-22	1.64e-06	1.49e-06
co-occurence of coordinated regulators	Coordinated Regulator	Coordinated Regulator	ceh-74	ceh-23	M01248_2.00	M00671_2.00	AIY	65	16.9609	3.83233	2.15e-22	0.000505382	0.00262186
co-occurence of coordinated regulators	Coordinated Regulator	Coordinated Regulator	ceh-74	ceh-10	M01248_2.00	M00287_2.00	AIY	62	15.403	4.02519	2.42e-22	0.00129873	1.9e-05
co-occurence of coordinated regulators	Coordinated Regulator	Coordinated Regulator	ztf-3	fax-1	M00640_2.00	M06432_2.00	AIY	96	36.9579	2.59755	2.65e-22	7.89e-07	1.08e-13
co-occurence of coordinated regulators	Coordinated Regulator	Coordinated Regulator	ceh-58	ceh-10	M00676_2.00	M00287_2.00	AIY	74	22.2683	3.32311	3.36e-22	0.00133332	9.57e-07
co-occurence of coordinated regulators	Coordinated Regulator	Coordinated Regulator	ztf-3	ztf-11	M00640_2.00	M00650_2.00	AIY	97	37.9939	2.55304	4.72e-22	4.13e-06	6.07e-12
co-occurence of coordinated regulators	Coordinated Regulator	Coordinated Regulator	lin-39	ceh-10	M08211_2.00	M00287_2.00	AIY	83	28.1995	2.94331	5.92e-22	3.17e-05	4.87e-05
co-occurence of coordinated regulators	Coordinated Regulator	Coordinated Regulator	hlh-16	lin-39	M00589_2.00	M08211_2.00	AIY	84	28.8814	2.90844	6.12e-22	3.13e-05	1.1e-05
co-occurence of coordinated regulators	Coordinated Regulator	Coordinated Regulator	ztf-3	ztf-9	M00640_2.00	M00636_2.00	AIY	62	15.7109	3.94631	6.63e-22	1.77e-05	4.86e-05
co-occurence of coordinated regulators	Coordinated Regulator	Coordinated Regulator	ceh-74	ttx-3	M01248_2.00	M02085_2.00	AIY	50	9.99835	5.00083	1.02e-21	0.00232373	0.000157376
co-occurence of coordinated regulators	Coordinated Regulator	Coordinated Regulator	hlh-16	ceh-23	M00589_2.00	M00671_2.00	AIY	84	29.2509	2.8717	1.41e-21	7.54e-05	0.00587047
co-occurence of coordinated regulators	Coordinated Regulator	Coordinated Regulator	ceh-74	ztf-3	M01248_2.00	M00640_2.00	AIY	57	13.4446	4.23962	1.83e-21	0.000836565	3.88e-06
co-occurence of coordinated regulators	Coordinated Regulator	Coordinated Regulator	ceh-10--ttx-3	fax-1	OH2007_CEH-10_TTX-3	M06432_2.00	AIY	119	57.2314	2.07928	2.78e-21	1.01e-22	1.57e-11
co-occurence of coordinated regulators	Coordinated Regulator	Coordinated Regulator	ceh-74	ztf-9	M01248_2.00	M00636_2.00	AIY	51	10.6892	4.77117	2.79e-21	0.000314991	1.45e-07
co-occurence of coordinated regulators	Coordinated Regulator	Coordinated Regulator	ttx-3	fax-1	M02085_2.00	M06432_2.00	AIY	80	27.4845	2.91073	1.08e-20	0.00384998	2.85e-12
co-occurence of coordinated regulators	Coordinated Regulator	Coordinated Regulator	hlh-16	fax-1	M00589_2.00	M06432_2.00	AIY	101	43.3653	2.32905	3.22e-20	0.000151072	3.49e-10
co-occurence of coordinated regulators	Coordinated Regulator	Coordinated Regulator	ttx-3	ztf-11	M02085_2.00	M00650_2.00	AIY	80	28.255	2.83136	6e-20	0.00548513	3.15e-10
co-occurence of coordinated regulators	Coordinated Regulator	Coordinated Regulator	ceh-10	fax-1	M00287_2.00	M06432_2.00	AIY	99	42.3414	2.33813	8.69e-20	1.8e-05	7.14e-12
co-occurence of coordinated regulators	Coordinated Regulator	Coordinated Regulator	ceh-10--ttx-3	ztf-11	OH2007_CEH-10_TTX-3	M00650_2.00	AIY	118	58.8357	2.00558	1.35e-19	4.02e-24	8.15e-13
co-occurence of coordinated regulators	Coordinated Regulator	Coordinated Regulator	hlh-16	ceh-58	M00589_2.00	M00676_2.00	AIY	71	22.8068	3.11311	1.41e-19	9.09e-05	0.00863363
co-occurence of coordinated regulators	Coordinated Regulator	Coordinated Regulator	ceh-48	ztf-3	M01905_2.00	M00640_2.00	AIY	80	28.714	2.7861	1.61e-19	0.0391203	1.32e-05
co-occurence of coordinated regulators	Coordinated Regulator	Coordinated Regulator	ceh-10--ttx-3	ceh-58	OH2007_CEH-10_TTX-3	M00676_2.00	AIY	82	30.0992	2.72432	1.67e-19	2.57e-18	0.0294546
co-occurence of coordinated regulators	Coordinated Regulator	Coordinated Regulator	ceh-10	ztf-11	M00287_2.00	M00650_2.00	AIY	100	43.5284	2.29735	1.71e-19	1.82e-05	1.15e-10
co-occurence of coordinated regulators	Coordinated Regulator	Coordinated Regulator	lin-39	fax-1	M08211_2.00	M06432_2.00	AIY	103	46.035	2.23743	1.94e-19	0.000138864	3.65e-14
co-occurence of coordinated regulators	Coordinated Regulator	Coordinated Regulator	ceh-58	lin-39	M00676_2.00	M08211_2.00	AIY	73	24.2108	3.01518	2e-19	0.0074023	6e-05
co-occurence of coordinated regulators	Coordinated Regulator	Coordinated Regulator	hlh-16	ztf-11	M00589_2.00	M00650_2.00	AIY	101	44.5809	2.26554	2.61e-19	6.51e-05	1.69e-09
co-occurence of coordinated regulators	Coordinated Regulator	Coordinated Regulator	lin-39	ztf-9	M08211_2.00	M00636_2.00	AIY	65	19.5696	3.32148	3.8e-19	3.25e-05	9.13e-06
co-occurence of coordinated regulators	Coordinated Regulator	Coordinated Regulator	lin-39	ztf-11	M08211_2.00	M00650_2.00	AIY	104	47.3255	2.19755	4.18e-19	2.71e-05	6.66e-13
co-occurence of coordinated regulators	Coordinated Regulator	Coordinated Regulator	ceh-10--ttx-3	ceh-74	OH2007_CEH-10_TTX-3	M01248_2.00	AIY	67	20.8197	3.2181	4.41e-19	6.31e-16	0.000303461
co-occurence of coordinated regulators	Coordinated Regulator	Coordinated Regulator	ttx-3	ztf-9	M02085_2.00	M00636_2.00	AIY	50	11.6837	4.27946	7.14e-19	0.0319513	3.09e-05
co-occurence of coordinated regulators	Coordinated Regulator	Coordinated Regulator	hlh-16	ceh-74	M00589_2.00	M01248_2.00	AIY	57	15.7755	3.6132	3.07e-18	0.000696352	0.00154622
co-occurence of coordinated regulators	Coordinated Regulator	Coordinated Regulator	ceh-23	ztf-11	M00671_2.00	M00650_2.00	AIY	103	47.931	2.14892	4.21e-18	0.00217131	1.02e-12
co-occurence of coordinated regulators	Coordinated Regulator	Coordinated Regulator	ceh-74	ceh-58	M01248_2.00	M00676_2.00	AIY	52	13.2243	3.93215	4.34e-18	0.00332786	0.0139522
co-occurence of coordinated regulators	Coordinated Regulator	Coordinated Regulator	ceh-10--ttx-3	ztf-9	OH2007_CEH-10_TTX-3	M00636_2.00	AIY	71	24.3292	2.91831	4.89e-18	2.27e-17	2.05e-06
co-occurence of coordinated regulators	Coordinated Regulator	Coordinated Regulator	ceh-58	fax-1	M00676_2.00	M06432_2.00	AIY	88	36.3524	2.42075	6.96e-18	0.0122058	1.23e-09
co-occurence of coordinated regulators	Coordinated Regulator	Coordinated Regulator	ceh-48	ttx-3	M01905_2.00	M02085_2.00	AIY	66	21.3537	3.09079	7.31e-18	0.0128652	0.00119927
co-occurence of coordinated regulators	Coordinated Regulator	Coordinated Regulator	ceh-74	ztf-11	M01248_2.00	M00650_2.00	AIY	72	25.8499	2.78531	3.19e-17	0.00964228	7.62e-10
co-occurence of coordinated regulators	Coordinated Regulator	Coordinated Regulator	ceh-48	lin-39	M01905_2.00	M08211_2.00	AIY	86	35.7663	2.4045	3.49e-17	0.00881406	2.9e-05
co-occurence of coordinated regulators	Coordinated Regulator	Coordinated Regulator	hlh-16	ceh-48	M00589_2.00	M01905_2.00	AIY	83	33.6921	2.46348	4.49e-17	6.72e-06	0.000428786
co-occurence of coordinated regulators	Coordinated Regulator	Coordinated Regulator	ceh-48	ceh-58	M01905_2.00	M00676_2.00	AIY	75	28.2436	2.65547	6.77e-17	0.0014345	0.0191834
co-occurence of coordinated regulators	Coordinated Regulator	Coordinated Regulator	ceh-74	fax-1	M01248_2.00	M06432_2.00	AIY	70	25.145	2.78385	1.16e-16	0.00215733	7.66e-11
co-occurence of coordinated regulators	Coordinated Regulator	Coordinated Regulator	hlh-16	ztf-9	M00589_2.00	M00636_2.00	AIY	59	18.4347	3.20049	1.75e-16	0.00014048	0.000165909
co-occurence of coordinated regulators	Coordinated Regulator	Coordinated Regulator	ceh-23	ztf-9	M00671_2.00	M00636_2.00	AIY	61	19.8199	3.07771	2.72e-16	0.0166352	1.08e-06
co-occurence of coordinated regulators	Coordinated Regulator	Coordinated Regulator	ceh-23	fax-1	M00671_2.00	M06432_2.00	AIY	98	46.624	2.10192	3.38e-16	0.000475732	7.22e-12
co-occurence of coordinated regulators	Coordinated Regulator	Coordinated Regulator	ceh-48	ceh-10	M01905_2.00	M00287_2.00	AIY	80	32.8966	2.43186	5.41e-16	0.00136891	1.55e-05
co-occurence of coordinated regulators	Coordinated Regulator	Coordinated Regulator	ceh-48	ceh-23	M01905_2.00	M00671_2.00	AIY	84	36.2239	2.31891	9.98e-16	0.00277834	0.00152421
co-occurence of coordinated regulators	Coordinated Regulator	Coordinated Regulator	ceh-10--ttx-3	ceh-48	OH2007_CEH-10_TTX-3	M01905_2.00	AIY	94	44.4652	2.11401	1.82e-15	4e-19	0.00461462
co-occurence of coordinated regulators	Coordinated Regulator	Coordinated Regulator	ceh-10	ztf-9	M00287_2.00	M00636_2.00	AIY	56	17.9994	3.11121	4.58e-15	0.000790354	5.13e-06
co-occurence of coordinated regulators	Coordinated Regulator	Coordinated Regulator	ceh-58	ztf-11	M00676_2.00	M00650_2.00	AIY	84	37.3715	2.2477	6.4e-15	0.00483253	1.68e-09
co-occurence of coordinated regulators	Coordinated Regulator	Coordinated Regulator	ceh-58	ztf-9	M00676_2.00	M00636_2.00	AIY	51	15.4535	3.30023	1.16e-14	0.0174176	4.76e-05
co-occurence of coordinated regulators	Coordinated Regulator	Coordinated Regulator	ztf-11	fax-1	M00650_2.00	M06432_2.00	AIY	121	71.059	1.70281	3.36e-14	4.8e-10	6.13e-12
co-occurence of coordinated regulators	Coordinated Regulator	Coordinated Regulator	ceh-48	ztf-9	M01905_2.00	M00636_2.00	AIY	62	22.8292	2.71582	4.57e-14	0.014064	3.32e-05
co-occurence of coordinated regulators	Coordinated Regulator	Coordinated Regulator	ztf-9	fax-1	M00636_2.00	M06432_2.00	AIY	70	29.3836	2.38228	3.13e-13	1.18e-06	5.97e-14
co-occurence of coordinated regulators	Coordinated Regulator	Coordinated Regulator	ztf-9	ztf-11	M00636_2.00	M00650_2.00	AIY	71	30.2073	2.35043	3.71e-13	1.08e-05	3.2e-12
co-occurence of coordinated regulators	Coordinated Regulator	Coordinated Regulator	ceh-48	fax-1	M01905_2.00	M06432_2.00	AIY	99	53.703	1.84347	1.49e-12	0.00321543	7.99e-13
co-occurence of coordinated regulators	Coordinated Regulator	Coordinated Regulator	ceh-48	ztf-11	M01905_2.00	M00650_2.00	AIY	98	55.2084	1.77509	2.48e-11	0.00824495	6.14e-08
co-occurence of coordinated regulators	Coordinated Regulator	Coordinated Regulator	ceh-38	ceh-48	M03716_2.00	M01905_2.00	AIZ	665	271.58	2.44864	1.61e-143	2.78e-31	2.11e-44
co-occurence of coordinated regulators	Coordinated Regulator	Coordinated Regulator	2020-06-01	fos-1	M00599_2.00	M01144_2.00	AIZ	362	91.0999	3.97366	4.88e-128	1.49e-26	6.85e-17
co-occurence of coordinated regulators	Coordinated Regulator	Coordinated Regulator	atf-7	crh-1	M00595_2.00	M03659_2.00	AIZ	370	98.7264	3.74773	1.09e-122	1.05e-40	1.96e-10
co-occurence of coordinated regulators	Coordinated Regulator	Coordinated Regulator	cey-1	ztf-3	M01903_2.00	M00640_2.00	AIZ	296	81.5888	3.62795	1.27e-91	4.1e-20	4.46e-41
co-occurence of coordinated regulators	Coordinated Regulator	Coordinated Regulator	xbp-1	atf-7	M00597_2.00	M00595_2.00	AIZ	327	99.5167	3.28588	3.18e-90	6e-07	1.87e-32
co-occurence of coordinated regulators	Coordinated Regulator	Coordinated Regulator	xbp-1	ztf-3	M00597_2.00	M00640_2.00	AIZ	321	98.2147	3.26835	1.01e-87	3.09e-05	7.15e-32
co-occurence of coordinated regulators	Coordinated Regulator	Coordinated Regulator	ceh-58	ceh-43	M00676_2.00	M00423_2.00	AIZ	379	136.629	2.77394	7.48e-84	1.61e-11	8.53e-23
co-occurence of coordinated regulators	Coordinated Regulator	Coordinated Regulator	atf-7	ztf-3	M00595_2.00	M00640_2.00	AIZ	366	129.412	2.82817	6.48e-83	4.43e-35	1.12e-38
co-occurence of coordinated regulators	Coordinated Regulator	Coordinated Regulator	xbp-1	ceh-74	M00597_2.00	M01248_2.00	AIZ	254	66.8223	3.80113	5.49e-82	3.96e-08	9.74e-14
co-occurence of coordinated regulators	Coordinated Regulator	Coordinated Regulator	ceh-74	ztf-3	M01248_2.00	M00640_2.00	AIZ	291	86.8962	3.34882	3.7e-81	2.64e-14	1.43e-35
co-occurence of coordinated regulators	Coordinated Regulator	Coordinated Regulator	atf-7	ceh-74	M00595_2.00	M01248_2.00	AIZ	291	88.0481	3.30501	9.47e-80	5.23e-33	8.65e-16
co-occurence of coordinated regulators	Coordinated Regulator	Coordinated Regulator	cey-1	ceh-74	M01903_2.00	M01248_2.00	AIZ	226	55.5105	4.0713	2.34e-78	2.08e-19	1.34e-16
co-occurence of coordinated regulators	Coordinated Regulator	Coordinated Regulator	atf-7	crh-2	M00595_2.00	M00603_2.00	AIZ	337	116.691	2.88798	9.43e-78	8.75e-34	8.54e-09
co-occurence of coordinated regulators	Coordinated Regulator	Coordinated Regulator	atf-7	cey-1	M00595_2.00	M01903_2.00	AIZ	278	82.6703	3.36275	1.4e-77	5.83e-34	1.86e-18
co-occurence of coordinated regulators	Coordinated Regulator	Coordinated Regulator	xbp-1	crh-2	M00597_2.00	M00603_2.00	AIZ	288	88.56	3.25203	3.85e-77	0.000309767	1.89e-06
co-occurence of coordinated regulators	Coordinated Regulator	Coordinated Regulator	ceh-43	ztf-3	M00423_2.00	M00640_2.00	AIZ	366	138.905	2.6349	4.66e-74	1.86e-28	8.64e-37
co-occurence of coordinated regulators	Coordinated Regulator	Coordinated Regulator	crh-2	ztf-3	M00603_2.00	M00640_2.00	AIZ	328	115.164	2.84811	8.78e-74	5.41e-09	3.11e-35
co-occurence of coordinated regulators	Coordinated Regulator	Coordinated Regulator	crh-1	ceh-74	M03659_2.00	M01248_2.00	AIZ	241	66.2917	3.63545	2.35e-73	1.31e-06	1.07e-14
co-occurence of coordinated regulators	Coordinated Regulator	Coordinated Regulator	xbp-1	cey-1	M00597_2.00	M01903_2.00	AIZ	234	62.741	3.72962	2.45e-73	2.76e-08	1.75e-20
co-occurence of coordinated regulators	Coordinated Regulator	Coordinated Regulator	xbp-1	2020-06-01	M00597_2.00	M00599_2.00	AIZ	285	90.3301	3.1551	3.96e-73	2.93e-08	3.96e-16
co-occurence of coordinated regulators	Coordinated Regulator	Coordinated Regulator	crh-1	cey-1	M03659_2.00	M01903_2.00	AIZ	232	62.2428	3.72734	1.31e-72	1.71e-06	9e-18
co-occurence of coordinated regulators	Coordinated Regulator	Coordinated Regulator	xbp-1	crh-1	M00597_2.00	M03659_2.00	AIZ	255	74.9264	3.40334	1.09e-71	1.38e-06	0.000133534
co-occurence of coordinated regulators	Coordinated Regulator	Coordinated Regulator	atf-7	fos-1	M00595_2.00	M01144_2.00	AIZ	298	100.365	2.96917	1.91e-70	2.12e-31	1.44e-14
co-occurence of coordinated regulators	Coordinated Regulator	Coordinated Regulator	crh-2	crh-1	M00603_2.00	M03659_2.00	AIZ	276	87.8568	3.14148	3.8e-70	2.5e-08	4.74e-08
co-occurence of coordinated regulators	Coordinated Regulator	Coordinated Regulator	fos-1	ztf-3	M01144_2.00	M00640_2.00	AIZ	294	99.0517	2.96815	2.39e-69	3.8e-16	1.2e-35
co-occurence of coordinated regulators	Coordinated Regulator	Coordinated Regulator	crh-1	ztf-3	M03659_2.00	M00640_2.00	AIZ	291	97.4348	2.98661	3.47e-69	2.77e-07	1.09e-40
co-occurence of coordinated regulators	Coordinated Regulator	Coordinated Regulator	crh-2	ceh-74	M00603_2.00	M01248_2.00	AIZ	257	78.3541	3.27998	7.91e-69	3.09e-10	2.61e-13
co-occurence of coordinated regulators	Coordinated Regulator	Coordinated Regulator	crh-2	cey-1	M00603_2.00	M01903_2.00	AIZ	248	73.5685	3.37101	1.12e-68	3.93e-13	7.98e-19
co-occurence of coordinated regulators	Coordinated Regulator	Coordinated Regulator	ceh-38	ztf-3	M03716_2.00	M00640_2.00	AIZ	426	186.899	2.27931	1.16e-68	2.07e-25	5.18e-33
co-occurence of coordinated regulators	Coordinated Regulator	Coordinated Regulator	2020-06-01	ztf-3	M00599_2.00	M00640_2.00	AIZ	323	117.466	2.74974	1.29e-68	3.24e-19	5.29e-40
co-occurence of coordinated regulators	Coordinated Regulator	Coordinated Regulator	ceh-48	ztf-3	M01905_2.00	M00640_2.00	AIZ	424	185.586	2.28465	1.43e-68	7.38e-24	1.18e-30
co-occurence of coordinated regulators	Coordinated Regulator	Coordinated Regulator	2020-06-01	ceh-74	M00599_2.00	M01248_2.00	AIZ	259	79.9201	3.24073	2.75e-68	1.22e-15	8.42e-14
co-occurence of coordinated regulators	Coordinated Regulator	Coordinated Regulator	ceh-58	ztf-3	M00676_2.00	M00640_2.00	AIZ	335	125.627	2.66663	4.23e-68	2.38e-10	2.11e-34
co-occurence of coordinated regulators	Coordinated Regulator	Coordinated Regulator	atf-7	2020-06-01	M00595_2.00	M00599_2.00	AIZ	321	119.023	2.69696	4.88e-66	1.09e-33	1.3e-17
co-occurence of coordinated regulators	Coordinated Regulator	Coordinated Regulator	2020-06-01	cey-1	M00599_2.00	M01903_2.00	AIZ	246	75.0389	3.2783	1.41e-65	3.7e-17	2.09e-19
co-occurence of coordinated regulators	Coordinated Regulator	Coordinated Regulator	fos-1	cey-1	M01144_2.00	M01903_2.00	AIZ	224	63.2757	3.54006	1.41e-65	6.03e-16	4.75e-18
co-occurence of coordinated regulators	Coordinated Regulator	Coordinated Regulator	xbp-1	fos-1	M00597_2.00	M01144_2.00	AIZ	248	76.1698	3.25588	1.52e-65	1.01e-05	3.91e-12
co-occurence of coordinated regulators	Coordinated Regulator	Coordinated Regulator	fos-1	ceh-74	M01144_2.00	M01248_2.00	AIZ	231	67.3918	3.42772	5.14e-65	4.43e-14	5.88e-12
co-occurence of coordinated regulators	Coordinated Regulator	Coordinated Regulator	unc-86	ztf-3	M02244_2.00	M00640_2.00	AIZ	303	110.142	2.75099	7.8e-64	9e-30	8.45e-33
co-occurence of coordinated regulators	Coordinated Regulator	Coordinated Regulator	cey-1	unc-86	M01903_2.00	M02244_2.00	AIZ	234	70.3603	3.32574	2.46e-63	1.94e-18	1.31e-26
co-occurence of coordinated regulators	Coordinated Regulator	Coordinated Regulator	cey-1	ceh-43	M01903_2.00	M00423_2.00	AIZ	266	88.7342	2.99772	5.93e-63	5.61e-21	8.65e-30
co-occurence of coordinated regulators	Coordinated Regulator	Coordinated Regulator	xbp-1	ceh-43	M00597_2.00	M00423_2.00	AIZ	296	106.816	2.77111	6.71e-63	1.04e-07	4.98e-22
co-occurence of coordinated regulators	Coordinated Regulator	Coordinated Regulator	cey-1	ztf-9	M01903_2.00	M00636_2.00	AIZ	222	64.8676	3.42236	3.55e-62	2.16e-19	2.58e-20
co-occurence of coordinated regulators	Coordinated Regulator	Coordinated Regulator	ceh-74	ceh-58	M01248_2.00	M00676_2.00	AIZ	259	85.4725	3.03021	4.15e-62	3.99e-14	1.28e-15
co-occurence of coordinated regulators	Coordinated Regulator	Coordinated Regulator	cey-1	unc-62	M01903_2.00	M02185_2.00	AIZ	246	78.1376	3.14829	5.16e-62	1.9e-19	3.5e-13
co-occurence of coordinated regulators	Coordinated Regulator	Coordinated Regulator	atf-7	ceh-58	M00595_2.00	M00676_2.00	AIZ	326	127.292	2.56104	1.18e-61	1.55e-31	1.2e-09
co-occurence of coordinated regulators	Coordinated Regulator	Coordinated Regulator	cey-1	ceh-58	M01903_2.00	M00676_2.00	AIZ	249	80.2521	3.10272	1.48e-61	1.18e-19	3.24e-14
co-occurence of coordinated regulators	Coordinated Regulator	Coordinated Regulator	ztf-3	ztf-9	M00640_2.00	M00636_2.00	AIZ	285	101.544	2.80667	1.65e-61	5.58e-33	1.04e-14
co-occurence of coordinated regulators	Coordinated Regulator	Coordinated Regulator	xbp-1	ceh-38	M00597_2.00	M03716_2.00	AIZ	350	143.724	2.43523	2.84e-61	1.78e-05	1.01e-19
co-occurence of coordinated regulators	Coordinated Regulator	Coordinated Regulator	ceh-74	unc-86	M01248_2.00	M02244_2.00	AIZ	239	74.9373	3.18933	3.32e-61	1.1e-13	1.87e-24
co-occurence of coordinated regulators	Coordinated Regulator	Coordinated Regulator	ceh-74	ztf-9	M01248_2.00	M00636_2.00	AIZ	228	69.0872	3.30017	5.82e-61	4.52e-16	6.06e-16
co-occurence of coordinated regulators	Coordinated Regulator	Coordinated Regulator	ceh-16	ztf-3	M06491_2.00	M00640_2.00	AIZ	431	201.927	2.13443	6.05e-61	9.47e-35	2.16e-34
co-occurence of coordinated regulators	Coordinated Regulator	Coordinated Regulator	atf-7	ceh-43	M00595_2.00	M00423_2.00	AIZ	344	140.746	2.44412	1.93e-60	1.19e-36	8.62e-26
co-occurence of coordinated regulators	Coordinated Regulator	Coordinated Regulator	xbp-1	ceh-58	M00597_2.00	M00676_2.00	AIZ	275	96.6056	2.84663	2e-60	1.03e-05	8.38e-12
co-occurence of coordinated regulators	Coordinated Regulator	Coordinated Regulator	xbp-1	ceh-48	M00597_2.00	M01905_2.00	AIZ	346	142.714	2.42443	5.78e-60	0.000109873	1.44e-19
co-occurence of coordinated regulators	Coordinated Regulator	Coordinated Regulator	fos-1	crh-1	M01144_2.00	M03659_2.00	AIZ	238	75.5649	3.14961	7.14e-60	1.64e-13	3.23e-05
co-occurence of coordinated regulators	Coordinated Regulator	Coordinated Regulator	xbp-1	ztf-9	M00597_2.00	M00636_2.00	AIZ	242	78.0861	3.09914	1.39e-59	6.26e-10	1.77e-16
co-occurence of coordinated regulators	Coordinated Regulator	Coordinated Regulator	unc-62	ztf-3	M02185_2.00	M00640_2.00	AIZ	314	122.317	2.56711	2.69e-59	4.33e-12	1.59e-36
co-occurence of coordinated regulators	Coordinated Regulator	Coordinated Regulator	2020-06-01	crh-1	M00599_2.00	M03659_2.00	AIZ	259	89.6127	2.89021	6.9e-58	2.91e-17	1.39e-06
co-occurence of coordinated regulators	Coordinated Regulator	Coordinated Regulator	xbp-1	ceh-16	M00597_2.00	M06491_2.00	AIZ	359	155.28	2.31195	2.81e-57	1.19e-05	5.97e-29
co-occurence of coordinated regulators	Coordinated Regulator	Coordinated Regulator	atf-7	ceh-38	M00595_2.00	M03716_2.00	AIZ	406	189.377	2.14388	4.5e-57	1.29e-31	1.44e-22
co-occurence of coordinated regulators	Coordinated Regulator	Coordinated Regulator	atf-7	ceh-16	M00595_2.00	M06491_2.00	AIZ	426	204.604	2.08207	6.79e-57	3.85e-30	1.36e-36
co-occurence of coordinated regulators	Coordinated Regulator	Coordinated Regulator	ceh-74	ceh-43	M01248_2.00	M00423_2.00	AIZ	265	94.5064	2.80404	1.2e-56	2.81e-18	1.17e-27
co-occurence of coordinated regulators	Coordinated Regulator	Coordinated Regulator	crh-1	ceh-43	M03659_2.00	M00423_2.00	AIZ	283	105.968	2.67062	2.43e-56	1.46e-07	3.82e-24
co-occurence of coordinated regulators	Coordinated Regulator	Coordinated Regulator	atf-7	ceh-48	M00595_2.00	M01905_2.00	AIZ	402	188.047	2.13777	4.94e-56	1.29e-30	1.16e-22
co-occurence of coordinated regulators	Coordinated Regulator	Coordinated Regulator	crh-1	ceh-58	M03659_2.00	M00676_2.00	AIZ	266	95.8385	2.7755	5.66e-56	6.88e-08	7.99e-11
co-occurence of coordinated regulators	Coordinated Regulator	Coordinated Regulator	2020-06-01	ceh-43	M00599_2.00	M00423_2.00	AIZ	316	127.753	2.47352	5.85e-56	1.19e-15	9.46e-24
co-occurence of coordinated regulators	Coordinated Regulator	Coordinated Regulator	atf-7	unc-86	M00595_2.00	M02244_2.00	AIZ	290	111.602	2.59852	2.59e-55	2.25e-30	6.5e-29
co-occurence of coordinated regulators	Coordinated Regulator	Coordinated Regulator	cebp-1	ztf-3	M00604_2.00	M00640_2.00	AIZ	482	251.234	1.91853	3.55e-55	1.3e-57	3.17e-33
co-occurence of coordinated regulators	Coordinated Regulator	Coordinated Regulator	xbp-1	unc-62	M00597_2.00	M02185_2.00	AIZ	261	94.0603	2.77482	8.58e-55	1.6e-06	7.67e-14
co-occurence of coordinated regulators	Coordinated Regulator	Coordinated Regulator	crh-2	fos-1	M00603_2.00	M01144_2.00	AIZ	253	89.3148	2.83268	1.07e-54	1.12e-08	2.45e-13
co-occurence of coordinated regulators	Coordinated Regulator	Coordinated Regulator	ceh-74	unc-62	M01248_2.00	M02185_2.00	AIZ	242	83.2205	2.90794	3e-54	4.31e-16	1.48e-13
co-occurence of coordinated regulators	Coordinated Regulator	Coordinated Regulator	2020-06-01	ceh-58	M00599_2.00	M00676_2.00	AIZ	294	115.541	2.54454	3.49e-54	2.9e-14	3.55e-16
co-occurence of coordinated regulators	Coordinated Regulator	Coordinated Regulator	cebp-1	ceh-38	M00604_2.00	M03716_2.00	AIZ	616	367.646	1.67552	4.18e-54	2.33e-42	7.79e-30
co-occurence of coordinated regulators	Coordinated Regulator	Coordinated Regulator	atf-7	ztf-9	M00595_2.00	M00636_2.00	AIZ	274	102.89	2.66304	4.33e-54	1.04e-34	5e-17
co-occurence of coordinated regulators	Coordinated Regulator	Coordinated Regulator	crh-2	2020-06-01	M00603_2.00	M00599_2.00	AIZ	278	105.919	2.62465	1.18e-53	6.9e-11	1.1e-18
co-occurence of coordinated regulators	Coordinated Regulator	Coordinated Regulator	crh-1	ceh-38	M03659_2.00	M03716_2.00	AIZ	333	142.582	2.33549	1.87e-53	2.7e-06	1.54e-20
co-occurence of coordinated regulators	Coordinated Regulator	Coordinated Regulator	xbp-1	unc-86	M00597_2.00	M02244_2.00	AIZ	243	84.6981	2.86901	2.21e-53	5.79e-07	2.25e-27
co-occurence of coordinated regulators	Coordinated Regulator	Coordinated Regulator	cey-1	ceh-48	M01903_2.00	M01905_2.00	AIZ	297	118.555	2.50516	2.5e-53	7.84e-15	1.64e-22
co-occurence of coordinated regulators	Coordinated Regulator	Coordinated Regulator	fos-1	ceh-43	M01144_2.00	M00423_2.00	AIZ	280	107.727	2.59917	3.35e-53	1.62e-16	1.33e-22
co-occurence of coordinated regulators	Coordinated Regulator	Coordinated Regulator	cey-1	ceh-38	M01903_2.00	M03716_2.00	AIZ	298	119.394	2.49594	3.47e-53	1.59e-13	5.97e-19
co-occurence of coordinated regulators	Coordinated Regulator	Coordinated Regulator	ceh-38	ceh-74	M03716_2.00	M01248_2.00	AIZ	309	127.16	2.43	8.15e-53	1.14e-22	2.77e-13
co-occurence of coordinated regulators	Coordinated Regulator	Coordinated Regulator	ceh-74	ceh-16	M01248_2.00	M06491_2.00	AIZ	324	137.385	2.35834	9.45e-53	2.27e-13	1.02e-33
co-occurence of coordinated regulators	Coordinated Regulator	Coordinated Regulator	crh-1	ceh-16	M03659_2.00	M06491_2.00	AIZ	348	154.047	2.25905	9.53e-53	3.49e-07	3.39e-32
co-occurence of coordinated regulators	Coordinated Regulator	Coordinated Regulator	ceh-43	ztf-9	M00423_2.00	M00636_2.00	AIZ	283	110.437	2.56255	1.5e-52	1.15e-19	2.64e-14
co-occurence of coordinated regulators	Coordinated Regulator	Coordinated Regulator	crh-1	unc-86	M03659_2.00	M02244_2.00	AIZ	240	84.0256	2.85627	2.6e-52	1.09e-07	6.98e-24
co-occurence of coordinated regulators	Coordinated Regulator	Coordinated Regulator	fos-1	ceh-58	M01144_2.00	M00676_2.00	AIZ	262	97.4289	2.68914	2.61e-52	1.58e-14	2.59e-14
co-occurence of coordinated regulators	Coordinated Regulator	Coordinated Regulator	atf-7	unc-62	M00595_2.00	M02185_2.00	AIZ	303	123.938	2.44477	3.2e-52	3.69e-31	9.5e-14
co-occurence of coordinated regulators	Coordinated Regulator	Coordinated Regulator	ceh-48	ceh-74	M01905_2.00	M01248_2.00	AIZ	306	126.267	2.42343	5.67e-52	3.76e-18	5.47e-14
co-occurence of coordinated regulators	Coordinated Regulator	Coordinated Regulator	ceh-58	ztf-9	M00676_2.00	M00636_2.00	AIZ	265	99.8801	2.65318	8.31e-52	3.73e-16	7.42e-15
co-occurence of coordinated regulators	Coordinated Regulator	Coordinated Regulator	fos-1	ztf-9	M01144_2.00	M00636_2.00	AIZ	230	78.7516	2.92058	1.09e-51	1.74e-12	1.39e-15
co-occurence of coordinated regulators	Coordinated Regulator	Coordinated Regulator	crh-1	unc-62	M03659_2.00	M02185_2.00	AIZ	253	93.3133	2.71129	5.08e-51	6.26e-05	4.42e-13
co-occurence of coordinated regulators	Coordinated Regulator	Coordinated Regulator	cey-1	ceh-16	M01903_2.00	M06491_2.00	AIZ	308	128.994	2.38771	6.09e-51	5.45e-19	6.78e-40
co-occurence of coordinated regulators	Coordinated Regulator	Coordinated Regulator	ceh-48	ceh-16	M01905_2.00	M06491_2.00	AIZ	523	293.417	1.78245	7.44e-51	8.73e-35	9.53e-27
co-occurence of coordinated regulators	Coordinated Regulator	Coordinated Regulator	ceh-38	ceh-16	M03716_2.00	M06491_2.00	AIZ	525	295.492	1.7767	1.14e-50	1.68e-34	1.7e-28
co-occurence of coordinated regulators	Coordinated Regulator	Coordinated Regulator	crh-1	ztf-9	M03659_2.00	M00636_2.00	AIZ	226	77.466	2.91741	1.21e-50	2.29e-06	2.49e-16
co-occurence of coordinated regulators	Coordinated Regulator	Coordinated Regulator	crh-1	ceh-48	M03659_2.00	M01905_2.00	AIZ	325	141.581	2.29551	2.91e-50	1.66e-05	1.73e-23
co-occurence of coordinated regulators	Coordinated Regulator	Coordinated Regulator	unc-86	ztf-3	M03312_2.00	M00640_2.00	AIZ	485	263.523	1.84045	5.24e-50	3.36e-49	4.77e-33
co-occurence of coordinated regulators	Coordinated Regulator	Coordinated Regulator	2020-06-01	ceh-38	M00599_2.00	M03716_2.00	AIZ	367	171.895	2.13503	5.25e-50	5.34e-18	6.43e-28
co-occurence of coordinated regulators	Coordinated Regulator	Coordinated Regulator	2020-06-01	ztf-9	M00599_2.00	M00636_2.00	AIZ	250	93.3918	2.67689	2.54e-49	3.93e-14	9.29e-18
co-occurence of coordinated regulators	Coordinated Regulator	Coordinated Regulator	crh-2	ceh-43	M00603_2.00	M00423_2.00	AIZ	299	125.25	2.38723	3.1e-49	6.93e-10	2.69e-29
co-occurence of coordinated regulators	Coordinated Regulator	Coordinated Regulator	cebp-1	ceh-48	M00604_2.00	M01905_2.00	AIZ	601	365.064	1.64629	3.15e-49	1.42e-40	1.48e-34
co-occurence of coordinated regulators	Coordinated Regulator	Coordinated Regulator	atf-7	cebp-1	M00595_2.00	M00604_2.00	AIZ	472	254.565	1.85415	3.63e-49	2.99e-31	1.1e-48
co-occurence of coordinated regulators	Coordinated Regulator	Coordinated Regulator	fos-1	unc-62	M01144_2.00	M02185_2.00	AIZ	252	94.8619	2.65649	3.96e-49	6.25e-12	1.01e-11
co-occurence of coordinated regulators	Coordinated Regulator	Coordinated Regulator	ceh-58	unc-86	M00676_2.00	M02244_2.00	AIZ	273	108.338	2.5199	4.92e-49	1.01e-12	1.58e-23
co-occurence of coordinated regulators	Coordinated Regulator	Coordinated Regulator	crh-2	ceh-58	M00603_2.00	M00676_2.00	AIZ	280	113.277	2.47181	9.67e-49	3.58e-10	2.8e-12
co-occurence of coordinated regulators	Coordinated Regulator	Coordinated Regulator	xbp-1	cebp-1	M00597_2.00	M00604_2.00	AIZ	392	193.197	2.02902	2.21e-48	1.7e-05	2.04e-44
co-occurence of coordinated regulators	Coordinated Regulator	Coordinated Regulator	ceh-38	ceh-43	M03716_2.00	M00423_2.00	AIZ	405	203.267	1.99245	2.75e-48	5.81e-28	1.38e-18
co-occurence of coordinated regulators	Coordinated Regulator	Coordinated Regulator	ceh-38	unc-86	M03716_2.00	M03312_2.00	AIZ	621	385.629	1.61036	3.3e-48	5.97e-31	2.12e-34
co-occurence of coordinated regulators	Coordinated Regulator	Coordinated Regulator	2020-06-01	unc-62	M00599_2.00	M02185_2.00	AIZ	277	112.497	2.46229	7.98e-48	2.33e-15	3.55e-13
co-occurence of coordinated regulators	Coordinated Regulator	Coordinated Regulator	fos-1	ceh-38	M01144_2.00	M03716_2.00	AIZ	324	144.948	2.23528	1.67e-47	2.03e-15	2.24e-23
co-occurence of coordinated regulators	Coordinated Regulator	Coordinated Regulator	unc-86	ceh-43	M02244_2.00	M00423_2.00	AIZ	287	119.788	2.3959	2.47e-47	2.32e-24	1.56e-24
co-occurence of coordinated regulators	Coordinated Regulator	Coordinated Regulator	crh-2	ceh-38	M00603_2.00	M03716_2.00	AIZ	356	168.527	2.11243	4.01e-47	4.39e-10	3.64e-20
co-occurence of coordinated regulators	Coordinated Regulator	Coordinated Regulator	crh-2	ceh-48	M00603_2.00	M01905_2.00	AIZ	354	167.343	2.11542	5.94e-47	3.6e-09	2.97e-20
co-occurence of coordinated regulators	Coordinated Regulator	Coordinated Regulator	ceh-48	ceh-43	M01905_2.00	M00423_2.00	AIZ	400	201.84	1.98177	6.01e-47	6.44e-28	4.45e-18
co-occurence of coordinated regulators	Coordinated Regulator	Coordinated Regulator	2020-06-01	ceh-48	M00599_2.00	M01905_2.00	AIZ	358	170.688	2.0974	1.05e-46	5.17e-17	5.43e-22
co-occurence of coordinated regulators	Coordinated Regulator	Coordinated Regulator	crh-2	unc-86	M00603_2.00	M02244_2.00	AIZ	253	99.3149	2.54745	5.84e-46	2.18e-09	1.07e-20
co-occurence of coordinated regulators	Coordinated Regulator	Coordinated Regulator	crh-2	unc-62	M00603_2.00	M02185_2.00	AIZ	269	110.293	2.43897	1.66e-45	1.33e-11	5.57e-12
co-occurence of coordinated regulators	Coordinated Regulator	Coordinated Regulator	fos-1	ceh-48	M01144_2.00	M01905_2.00	AIZ	318	143.93	2.2094	2.11e-45	3.75e-13	1.25e-17
co-occurence of coordinated regulators	Coordinated Regulator	Coordinated Regulator	ceh-38	ceh-58	M03716_2.00	M00676_2.00	AIZ	372	183.837	2.02353	4.11e-45	5.09e-25	1.9e-10
co-occurence of coordinated regulators	Coordinated Regulator	Coordinated Regulator	unc-62	ztf-9	M02185_2.00	M00636_2.00	AIZ	248	97.2485	2.55017	4.69e-45	2.87e-11	1.71e-17
co-occurence of coordinated regulators	Coordinated Regulator	Coordinated Regulator	cebp-1	ceh-74	M00604_2.00	M01248_2.00	AIZ	354	170.932	2.071	8.24e-45	1.91e-49	1.48e-13
co-occurence of coordinated regulators	Coordinated Regulator	Coordinated Regulator	ceh-48	ceh-58	M01905_2.00	M00676_2.00	AIZ	369	182.546	2.02141	1.45e-44	8.45e-24	2.59e-10
co-occurence of coordinated regulators	Coordinated Regulator	Coordinated Regulator	2020-06-01	unc-86	M00599_2.00	M02244_2.00	AIZ	253	101.3	2.49754	2.14e-44	1.88e-16	1.65e-27
co-occurence of coordinated regulators	Coordinated Regulator	Coordinated Regulator	ceh-48	unc-86	M01905_2.00	M03312_2.00	AIZ	607	382.921	1.58518	4.84e-44	1.85e-34	2.95e-32
co-occurence of coordinated regulators	Coordinated Regulator	Coordinated Regulator	xbp-1	unc-86	M00597_2.00	M03312_2.00	AIZ	394	202.647	1.94427	5.3e-44	8.9e-05	2.13e-46
co-occurence of coordinated regulators	Coordinated Regulator	Coordinated Regulator	unc-62	ceh-43	M02185_2.00	M00423_2.00	AIZ	299	133.029	2.24763	8.11e-44	2.47e-13	1.38e-25
co-occurence of coordinated regulators	Coordinated Regulator	Coordinated Regulator	ceh-58	ceh-16	M00676_2.00	M06491_2.00	AIZ	388	198.619	1.95349	1.11e-43	6.23e-11	1.29e-35
co-occurence of coordinated regulators	Coordinated Regulator	Coordinated Regulator	atf-7	unc-86	M00595_2.00	M03312_2.00	AIZ	473	267.016	1.77143	1.58e-43	2.68e-30	1.87e-48
co-occurence of coordinated regulators	Coordinated Regulator	Coordinated Regulator	fos-1	unc-86	M01144_2.00	M02244_2.00	AIZ	226	85.42	2.64575	2.2e-43	9.47e-11	1.92e-22
co-occurence of coordinated regulators	Coordinated Regulator	Coordinated Regulator	ceh-43	ceh-16	M00423_2.00	M06491_2.00	AIZ	414	219.611	1.88515	2.56e-43	7.47e-22	3.51e-34
co-occurence of coordinated regulators	Coordinated Regulator	Coordinated Regulator	cebp-1	crh-1	M00604_2.00	M03659_2.00	AIZ	377	191.662	1.967	6.94e-43	1.58e-42	1.14e-06
co-occurence of coordinated regulators	Coordinated Regulator	Coordinated Regulator	ceh-58	unc-62	M00676_2.00	M02185_2.00	AIZ	278	120.313	2.31065	1.21e-42	1.85e-14	6.06e-14
co-occurence of coordinated regulators	Coordinated Regulator	Coordinated Regulator	fos-1	ceh-16	M01144_2.00	M06491_2.00	AIZ	329	156.603	2.10085	1.94e-42	1.27e-15	1.36e-32
co-occurence of coordinated regulators	Coordinated Regulator	Coordinated Regulator	unc-62	unc-86	M02185_2.00	M02244_2.00	AIZ	255	105.483	2.41745	3.2e-42	6.53e-14	2.47e-29
co-occurence of coordinated regulators	Coordinated Regulator	Coordinated Regulator	2020-06-01	ceh-16	M00599_2.00	M06491_2.00	AIZ	366	185.716	1.97075	1.44e-41	4.49e-20	4.94e-37
co-occurence of coordinated regulators	Coordinated Regulator	Coordinated Regulator	crh-2	ceh-16	M00603_2.00	M06491_2.00	AIZ	361	182.077	1.98268	1.75e-41	6.42e-09	8.93e-35
co-occurence of coordinated regulators	Coordinated Regulator	Coordinated Regulator	cey-1	unc-86	M01903_2.00	M03312_2.00	AIZ	342	168.342	2.03158	3.46e-41	5.06e-17	2.25e-51
co-occurence of coordinated regulators	Coordinated Regulator	Coordinated Regulator	unc-86	ztf-9	M02244_2.00	M00636_2.00	AIZ	225	87.569	2.5694	4.25e-41	1.45e-25	1.22e-17
co-occurence of coordinated regulators	Coordinated Regulator	Coordinated Regulator	cebp-1	cey-1	M00604_2.00	M01903_2.00	AIZ	331	160.492	2.06241	5.06e-41	4.74e-47	3.94e-18
co-occurence of coordinated regulators	Coordinated Regulator	Coordinated Regulator	crh-2	ztf-9	M00603_2.00	M00636_2.00	AIZ	231	91.5618	2.52289	5.91e-41	5.31e-12	1.15e-16
co-occurence of coordinated regulators	Coordinated Regulator	Coordinated Regulator	ceh-74	unc-86	M01248_2.00	M03312_2.00	AIZ	355	179.293	1.98	1.57e-40	1.18e-13	1.18e-45
co-occurence of coordinated regulators	Coordinated Regulator	Coordinated Regulator	cebp-1	ceh-16	M00604_2.00	M06491_2.00	AIZ	612	397.207	1.54076	2.85e-40	3.02e-48	2.51e-23
co-occurence of coordinated regulators	Coordinated Regulator	Coordinated Regulator	cebp-1	crh-2	M00604_2.00	M00603_2.00	AIZ	411	226.537	1.81427	8.9e-39	6.07e-48	4.22e-09
co-occurence of coordinated regulators	Coordinated Regulator	Coordinated Regulator	ceh-48	unc-62	M01905_2.00	M02185_2.00	AIZ	348	177.736	1.95796	1.57e-38	5.78e-25	2.16e-10
co-occurence of coordinated regulators	Coordinated Regulator	Coordinated Regulator	unc-86	ceh-16	M02244_2.00	M06491_2.00	AIZ	343	174.137	1.96971	1.98e-38	4.39e-26	3.29e-39
co-occurence of coordinated regulators	Coordinated Regulator	Coordinated Regulator	ceh-38	unc-62	M03716_2.00	M02185_2.00	AIZ	349	178.993	1.94979	2.85e-38	7.22e-21	3.66e-09
co-occurence of coordinated regulators	Coordinated Regulator	Coordinated Regulator	ceh-38	ztf-9	M03716_2.00	M00636_2.00	AIZ	308	148.595	2.07275	3.5e-38	4.12e-23	1.8e-11
co-occurence of coordinated regulators	Coordinated Regulator	Coordinated Regulator	ceh-48	ztf-9	M01905_2.00	M00636_2.00	AIZ	305	147.551	2.06708	1.58e-37	1.17e-18	4.99e-11
co-occurence of coordinated regulators	Coordinated Regulator	Coordinated Regulator	ceh-38	unc-86	M03716_2.00	M02244_2.00	AIZ	323	161.177	2.004	2.49e-37	2.8e-19	2.22e-22
co-occurence of coordinated regulators	Coordinated Regulator	Coordinated Regulator	ceh-16	ztf-9	M06491_2.00	M00636_2.00	AIZ	322	160.543	2.00569	2.86e-37	1.97e-32	9.61e-16
co-occurence of coordinated regulators	Coordinated Regulator	Coordinated Regulator	ceh-48	unc-86	M01905_2.00	M02244_2.00	AIZ	320	160.046	1.99943	9.89e-37	1.19e-23	8.42e-24
co-occurence of coordinated regulators	Coordinated Regulator	Coordinated Regulator	cebp-1	2020-06-01	M00604_2.00	M00599_2.00	AIZ	411	231.065	1.77872	1.06e-36	1.53e-58	7.96e-22
co-occurence of coordinated regulators	Coordinated Regulator	Coordinated Regulator	crh-1	unc-86	M03659_2.00	M03312_2.00	AIZ	372	201.037	1.8504	3.66e-36	1.35e-07	4.13e-48
co-occurence of coordinated regulators	Coordinated Regulator	Coordinated Regulator	cebp-1	fos-1	M00604_2.00	M01144_2.00	AIZ	364	194.843	1.86817	4e-36	1.28e-53	6.84e-17
co-occurence of coordinated regulators	Coordinated Regulator	Coordinated Regulator	unc-86	ceh-16	M03312_2.00	M06491_2.00	AIZ	619	416.636	1.48571	1.35e-35	2.2e-43	1.95e-27
co-occurence of coordinated regulators	Coordinated Regulator	Coordinated Regulator	cebp-1	ceh-43	M00604_2.00	M00423_2.00	AIZ	458	273.237	1.6762	2.42e-35	5.21e-53	1.03e-21
co-occurence of coordinated regulators	Coordinated Regulator	Coordinated Regulator	cebp-1	ceh-58	M00604_2.00	M00676_2.00	AIZ	426	247.118	1.72387	4.65e-35	3.16e-42	7.97e-11
co-occurence of coordinated regulators	Coordinated Regulator	Coordinated Regulator	crh-2	unc-86	M00603_2.00	M03312_2.00	AIZ	413	237.618	1.73808	1.54e-34	5.46e-09	2.01e-42
co-occurence of coordinated regulators	Coordinated Regulator	Coordinated Regulator	2020-06-01	unc-86	M00599_2.00	M03312_2.00	AIZ	414	242.367	1.70815	6.93e-33	4.41e-21	2.59e-43
co-occurence of coordinated regulators	Coordinated Regulator	Coordinated Regulator	unc-62	ceh-16	M02185_2.00	M06491_2.00	AIZ	353	193.386	1.82537	9.66e-33	6.97e-13	3.49e-35
co-occurence of coordinated regulators	Coordinated Regulator	Coordinated Regulator	fos-1	unc-86	M01144_2.00	M03312_2.00	AIZ	366	204.374	1.79084	1.95e-32	3.87e-16	2.43e-39
co-occurence of coordinated regulators	Coordinated Regulator	Coordinated Regulator	unc-86	ceh-43	M03312_2.00	M00423_2.00	AIZ	459	286.602	1.60153	1.7e-30	2.36e-46	4.04e-22
co-occurence of coordinated regulators	Coordinated Regulator	Coordinated Regulator	ceh-58	unc-86	M00676_2.00	M03312_2.00	AIZ	426	259.205	1.64348	3.45e-30	2.09e-10	2.22e-46
co-occurence of coordinated regulators	Coordinated Regulator	Coordinated Regulator	cebp-1	unc-86	M00604_2.00	M03312_2.00	AIZ	704	518.372	1.3581	1.72e-29	2.47e-45	1.72e-37
co-occurence of coordinated regulators	Coordinated Regulator	Coordinated Regulator	cebp-1	unc-86	M00604_2.00	M02244_2.00	AIZ	370	216.659	1.70776	1.31e-28	2.37e-48	5.41e-27
co-occurence of coordinated regulators	Coordinated Regulator	Coordinated Regulator	cebp-1	unc-62	M00604_2.00	M02185_2.00	AIZ	395	240.607	1.64168	2.36e-27	5.71e-52	4.97e-10
co-occurence of coordinated regulators	Coordinated Regulator	Coordinated Regulator	cebp-1	ztf-9	M00604_2.00	M00636_2.00	AIZ	340	199.745	1.70217	1.28e-25	6.61e-48	9.58e-15
co-occurence of coordinated regulators	Coordinated Regulator	Coordinated Regulator	unc-86	unc-86	M03312_2.00	M02244_2.00	AIZ	372	227.256	1.63692	3.55e-25	2.37e-46	1.57e-26
co-occurence of coordinated regulators	Coordinated Regulator	Coordinated Regulator	unc-86	ztf-9	M03312_2.00	M00636_2.00	AIZ	349	209.515	1.66575	1.09e-24	8.11e-38	1.08e-13
co-occurence of coordinated regulators	Coordinated Regulator	Coordinated Regulator	unc-62	unc-86	M02185_2.00	M03312_2.00	AIZ	396	252.376	1.56909	1.76e-23	1.82e-10	1.56e-44
co-occurence of coordinated regulators	Coordinated Regulator	Coordinated Regulator	unc-62	nhr-6	M02185_2.00	M01298_2.00	ALA	92	22.4119	4.10497	4.76e-37	3.73e-05	2.73e-10
co-occurence of coordinated regulators	Coordinated Regulator	Coordinated Regulator	unc-62	lim-7	M02185_2.00	M01242_2.00	ALA	85	19.354	4.39185	1.16e-35	4.43e-06	8.78e-05
co-occurence of coordinated regulators	Coordinated Regulator	Coordinated Regulator	unc-62	ztf-3	M02185_2.00	M00640_2.00	ALA	81	17.428	4.6477	2.37e-35	4.31e-05	2.07e-06
co-occurence of coordinated regulators	Coordinated Regulator	Coordinated Regulator	lim-7	nhr-6	M01242_2.00	M01298_2.00	ALA	93	25.988	3.57858	9.09e-33	2.96e-05	2.31e-08
co-occurence of coordinated regulators	Coordinated Regulator	Coordinated Regulator	ztf-3	nhr-6	M00640_2.00	M01298_2.00	ALA	87	23.4017	3.71767	2.91e-31	5.63e-06	7.86e-10
co-occurence of coordinated regulators	Coordinated Regulator	Coordinated Regulator	ceh-14	nhr-6	M00435_2.00	M01298_2.00	ALA	109	40.2333	2.7092	1.46e-29	1.91e-11	3.57e-10
co-occurence of coordinated regulators	Coordinated Regulator	Coordinated Regulator	unc-62	ceh-14	M02185_2.00	M00435_2.00	ALA	95	29.9629	3.17058	1.74e-29	6.35e-06	4.83e-12
co-occurence of coordinated regulators	Coordinated Regulator	Coordinated Regulator	unc-62	ztf-9	M02185_2.00	M00636_2.00	ALA	67	13.8562	4.83538	2.73e-29	2.76e-05	4.6e-05
co-occurence of coordinated regulators	Coordinated Regulator	Coordinated Regulator	ztf-9	nhr-6	M00636_2.00	M01298_2.00	ALA	76	18.6057	4.08478	4.53e-29	1.06e-05	2.79e-07
co-occurence of coordinated regulators	Coordinated Regulator	Coordinated Regulator	atf-5	nhr-6	M00593_2.00	M01298_2.00	ALA	79	21.3418	3.70166	1.36e-27	0.000172721	3.47e-09
co-occurence of coordinated regulators	Coordinated Regulator	Coordinated Regulator	ztf-3	ztf-9	M00640_2.00	M00636_2.00	ALA	66	14.4682	4.56173	2.36e-27	3.76e-05	0.000239827
co-occurence of coordinated regulators	Coordinated Regulator	Coordinated Regulator	lim-7	ztf-9	M01242_2.00	M00636_2.00	ALA	69	16.0672	4.29447	3.18e-27	3.32e-05	1.38e-05
co-occurence of coordinated regulators	Coordinated Regulator	Coordinated Regulator	atf-5	unc-62	M00593_2.00	M02185_2.00	ALA	68	15.8939	4.27838	1.12e-26	9.89e-05	0.000513
co-occurence of coordinated regulators	Coordinated Regulator	Coordinated Regulator	ceh-14	ztf-3	M00435_2.00	M00640_2.00	ALA	93	31.2863	2.97254	1.69e-26	1.64e-12	7.93e-06
co-occurence of coordinated regulators	Coordinated Regulator	Coordinated Regulator	unc-62	ceh-18	M02185_2.00	M00681_2.00	ALA	82	24.0939	3.40335	2.16e-26	2.25e-05	2.11e-11
co-occurence of coordinated regulators	Coordinated Regulator	Coordinated Regulator	atf-5	ztf-9	M00593_2.00	M00636_2.00	ALA	62	13.1946	4.69888	3.49e-26	0.0130672	0.000702193
co-occurence of coordinated regulators	Coordinated Regulator	Coordinated Regulator	atf-5	lim-7	M00593_2.00	M01242_2.00	ALA	72	18.43	3.90668	4.3e-26	0.00120036	0.000412338
co-occurence of coordinated regulators	Coordinated Regulator	Coordinated Regulator	lim-7	ztf-3	M01242_2.00	M00640_2.00	ALA	75	20.2089	3.71124	5.53e-26	0.000802227	8.21e-07
co-occurence of coordinated regulators	Coordinated Regulator	Coordinated Regulator	lim-7	ceh-14	M01242_2.00	M00435_2.00	ALA	97	34.744	2.79185	6.5e-26	0.000366863	1.79e-12
co-occurence of coordinated regulators	Coordinated Regulator	Coordinated Regulator	ceh-74	nhr-6	M01248_2.00	M01298_2.00	ALA	67	15.9218	4.20806	8.05e-26	0.00544263	3.33e-07
co-occurence of coordinated regulators	Coordinated Regulator	Coordinated Regulator	unc-62	ztf-11	M02185_2.00	M00650_2.00	ALA	94	33.5088	2.80524	5.81e-25	2.12e-05	5.24e-13
co-occurence of coordinated regulators	Coordinated Regulator	Coordinated Regulator	ceh-58	lim-7	M00676_2.00	M01242_2.00	ALA	73	19.8778	3.67244	6.97e-25	3.27e-06	7.34e-05
co-occurence of coordinated regulators	Coordinated Regulator	Coordinated Regulator	ceh-58	unc-62	M00676_2.00	M02185_2.00	ALA	68	17.1424	3.96676	8.6e-25	1.92e-05	6.41e-07
co-occurence of coordinated regulators	Coordinated Regulator	Coordinated Regulator	ceh-14	ztf-9	M00435_2.00	M00636_2.00	ALA	81	24.8744	3.25636	1.03e-24	2.34e-10	6.96e-05
co-occurence of coordinated regulators	Coordinated Regulator	Coordinated Regulator	ceh-58	nhr-6	M00676_2.00	M01298_2.00	ALA	78	23.0183	3.3886	1.1e-24	1.44e-05	8.35e-11
co-occurence of coordinated regulators	Coordinated Regulator	Coordinated Regulator	ztf-11	nhr-6	M00650_2.00	M01298_2.00	ALA	108	44.9945	2.40029	1.64e-24	5.81e-12	7.13e-11
co-occurence of coordinated regulators	Coordinated Regulator	Coordinated Regulator	ceh-18	nhr-6	M00681_2.00	M01298_2.00	ALA	91	32.3525	2.81276	5.73e-24	8.51e-11	1.19e-08
co-occurence of coordinated regulators	Coordinated Regulator	Coordinated Regulator	atf-5	ceh-58	M00593_2.00	M00676_2.00	ALA	65	16.324	3.98187	1.23e-23	2.32e-05	0.00263232
co-occurence of coordinated regulators	Coordinated Regulator	Coordinated Regulator	ceh-74	lim-7	M01248_2.00	M01242_2.00	ALA	60	13.7495	4.3638	1.31e-23	0.00787739	0.000402879
co-occurence of coordinated regulators	Coordinated Regulator	Coordinated Regulator	ceh-74	ztf-3	M01248_2.00	M00640_2.00	ALA	57	12.3812	4.60376	1.92e-23	0.0105964	1.38e-07
co-occurence of coordinated regulators	Coordinated Regulator	Coordinated Regulator	atf-5	ceh-18	M00593_2.00	M00681_2.00	ALA	76	22.9436	3.31248	2.61e-23	0.000172908	4.59e-09
co-occurence of coordinated regulators	Coordinated Regulator	Coordinated Regulator	ceh-18	ztf-9	M00681_2.00	M00636_2.00	ALA	71	20.0021	3.54963	3.2e-23	1.23e-09	0.000591669
co-occurence of coordinated regulators	Coordinated Regulator	Coordinated Regulator	ceh-58	ztf-9	M00676_2.00	M00636_2.00	ALA	60	14.2312	4.2161	7.43e-23	3.79e-05	9.16e-06
co-occurence of coordinated regulators	Coordinated Regulator	Coordinated Regulator	lim-7	ztf-11	M01242_2.00	M00650_2.00	ALA	98	38.8556	2.52216	7.99e-23	5.62e-05	1.53e-12
co-occurence of coordinated regulators	Coordinated Regulator	Coordinated Regulator	atf-5	ztf-3	M00593_2.00	M00640_2.00	ALA	64	16.5959	3.85638	1.73e-22	0.000251689	2.99e-05
co-occurence of coordinated regulators	Coordinated Regulator	Coordinated Regulator	ceh-58	ztf-3	M00676_2.00	M00640_2.00	ALA	66	17.8996	3.68723	3.15e-22	9.25e-06	4.69e-07
co-occurence of coordinated regulators	Coordinated Regulator	Coordinated Regulator	atf-5	ceh-14	M00593_2.00	M00435_2.00	ALA	83	28.5324	2.90898	3.34e-22	0.000985231	9.85e-12
co-occurence of coordinated regulators	Coordinated Regulator	Coordinated Regulator	ceh-74	unc-62	M01248_2.00	M02185_2.00	ALA	54	11.8575	4.55409	6.69e-22	0.00229256	7.48e-05
co-occurence of coordinated regulators	Coordinated Regulator	Coordinated Regulator	ceh-18	ceh-14	M00681_2.00	M00435_2.00	ALA	102	43.2529	2.35822	7.6e-22	1.15e-09	3.71e-12
co-occurence of coordinated regulators	Coordinated Regulator	Coordinated Regulator	ztf-9	ztf-11	M00636_2.00	M00650_2.00	ALA	81	27.818	2.91178	1.49e-21	5.12e-05	9.37e-11
co-occurence of coordinated regulators	Coordinated Regulator	Coordinated Regulator	ceh-18	lim-7	M00681_2.00	M01242_2.00	ALA	81	27.9384	2.89923	1.96e-21	2.43e-11	1.81e-05
co-occurence of coordinated regulators	Coordinated Regulator	Coordinated Regulator	atf-5	ceh-74	M00593_2.00	M01248_2.00	ALA	52	11.2913	4.6053	2.98e-21	0.000426799	0.0024441
co-occurence of coordinated regulators	Coordinated Regulator	Coordinated Regulator	ceh-74	ztf-9	M01248_2.00	M00636_2.00	ALA	48	9.84373	4.8762	1.51e-20	0.00303642	1.24e-05
co-occurence of coordinated regulators	Coordinated Regulator	Coordinated Regulator	ceh-18	ztf-3	M00681_2.00	M00640_2.00	ALA	75	25.1581	2.98115	3.34e-20	2.45e-11	1.83e-06
co-occurence of coordinated regulators	Coordinated Regulator	Coordinated Regulator	atf-5	ztf-11	M00593_2.00	M00650_2.00	ALA	84	31.9089	2.6325	1.08e-19	0.00260655	1.6e-11
co-occurence of coordinated regulators	Coordinated Regulator	Coordinated Regulator	ztf-3	ztf-11	M00640_2.00	M00650_2.00	ALA	88	34.9888	2.51509	1.38e-19	2e-05	8.3e-12
co-occurence of coordinated regulators	Coordinated Regulator	Coordinated Regulator	ceh-58	ceh-18	M00676_2.00	M00681_2.00	ALA	72	24.7459	2.90957	1.2e-18	2.78e-05	1.39e-10
co-occurence of coordinated regulators	Coordinated Regulator	Coordinated Regulator	ceh-58	ceh-14	M00676_2.00	M00435_2.00	ALA	80	30.7738	2.59962	3.57e-18	6.17e-05	3.6e-14
co-occurence of coordinated regulators	Coordinated Regulator	Coordinated Regulator	ceh-74	ceh-14	M01248_2.00	M00435_2.00	ALA	65	21.2863	3.05361	1.33e-17	0.00927749	1.22e-10
co-occurence of coordinated regulators	Coordinated Regulator	Coordinated Regulator	ceh-74	ceh-58	M01248_2.00	M00676_2.00	ALA	49	12.1783	4.02354	1.4e-17	0.000711526	2.21e-06
co-occurence of coordinated regulators	Coordinated Regulator	Coordinated Regulator	ceh-14	ztf-11	M00435_2.00	M00650_2.00	ALA	114	60.1542	1.89513	1.42e-17	9.74e-14	2.9e-13
co-occurence of coordinated regulators	Coordinated Regulator	Coordinated Regulator	ceh-74	ztf-11	M01248_2.00	M00650_2.00	ALA	66	23.8053	2.77249	8.49e-16	0.00788717	6.06e-10
co-occurence of coordinated regulators	Coordinated Regulator	Coordinated Regulator	ceh-18	ztf-11	M00681_2.00	M00650_2.00	ALA	98	48.3714	2.02599	8.94e-16	6.2e-11	3.61e-13
co-occurence of coordinated regulators	Coordinated Regulator	Coordinated Regulator	ceh-74	ceh-18	M01248_2.00	M00681_2.00	ALA	55	17.1168	3.21322	1.42e-15	0.0026	7.1e-08
co-occurence of coordinated regulators	Coordinated Regulator	Coordinated Regulator	ceh-58	ztf-11	M00676_2.00	M00650_2.00	ALA	78	34.4155	2.26642	3.32e-14	1.36e-05	3.14e-13
co-occurence of coordinated regulators	Coordinated Regulator	Coordinated Regulator	ceh-74	ztf-3	M01248_2.00	M00640_2.00	ALM	115	22.4077	5.13217	1.15e-51	8.6e-09	6.73e-14
co-occurence of coordinated regulators	Coordinated Regulator	Coordinated Regulator	unc-62	ztf-3	M02185_2.00	M00640_2.00	ALM	128	31.5414	4.05815	5.02e-47	2.18e-08	1.33e-12
co-occurence of coordinated regulators	Coordinated Regulator	Coordinated Regulator	ceh-74	ceh-58	M01248_2.00	M00676_2.00	ALM	107	22.0405	4.85469	2.62e-45	3.26e-10	3.3e-14
co-occurence of coordinated regulators	Coordinated Regulator	Coordinated Regulator	ceh-58	ztf-3	M00676_2.00	M00640_2.00	ALM	127	32.395	3.92036	5.84e-45	1.45e-12	1.45e-12
co-occurence of coordinated regulators	Coordinated Regulator	Coordinated Regulator	atf-7	ceh-58	M00595_2.00	M00676_2.00	ALM	127	32.8244	3.86907	2.42e-44	2.25e-08	3.17e-09
co-occurence of coordinated regulators	Coordinated Regulator	Coordinated Regulator	ceh-74	ceh-18	M01248_2.00	M00681_2.00	ALM	123	30.9782	3.97053	7.59e-44	2.67e-08	5.41e-15
co-occurence of coordinated regulators	Coordinated Regulator	Coordinated Regulator	ceh-58	unc-62	M00676_2.00	M02185_2.00	ALM	123	31.0247	3.96459	8.84e-44	1.73e-11	1.4e-10
co-occurence of coordinated regulators	Coordinated Regulator	Coordinated Regulator	atf-7	ztf-3	M00595_2.00	M00640_2.00	ALM	127	33.3711	3.80568	1.43e-43	1.2e-11	5.59e-13
co-occurence of coordinated regulators	Coordinated Regulator	Coordinated Regulator	ceh-18	ztf-3	M00681_2.00	M00640_2.00	ALM	147	45.5315	3.22853	2.4e-43	3.43e-16	1.92e-12
co-occurence of coordinated regulators	Coordinated Regulator	Coordinated Regulator	atf-7	ceh-74	M00595_2.00	M01248_2.00	ALM	106	22.7047	4.66864	2.94e-43	7.19e-11	4.79e-10
co-occurence of coordinated regulators	Coordinated Regulator	Coordinated Regulator	ceh-74	unc-62	M01248_2.00	M02185_2.00	ALM	103	21.4598	4.79967	5.82e-43	6.83e-08	1.16e-09
co-occurence of coordinated regulators	Coordinated Regulator	Coordinated Regulator	ceh-58	unc-86	M00676_2.00	M02244_2.00	ALM	116	27.9367	4.15225	7.68e-43	6.72e-12	4.51e-18
co-occurence of coordinated regulators	Coordinated Regulator	Coordinated Regulator	ceh-58	ceh-18	M00676_2.00	M00681_2.00	ALM	145	44.7855	3.23765	9.84e-43	4.61e-12	5.59e-17
co-occurence of coordinated regulators	Coordinated Regulator	Coordinated Regulator	ceh-74	ztf-9	M01248_2.00	M00636_2.00	ALM	94	17.8153	5.27635	3.3e-42	6.85e-07	2.37e-08
co-occurence of coordinated regulators	Coordinated Regulator	Coordinated Regulator	unc-86	ztf-3	M02244_2.00	M00640_2.00	ALM	116	28.402	4.08422	3.93e-42	6.35e-17	2.54e-13
co-occurence of coordinated regulators	Coordinated Regulator	Coordinated Regulator	atf-7	unc-62	M00595_2.00	M02185_2.00	ALM	122	31.9596	3.81733	1.15e-41	8.34e-12	5.92e-08
co-occurence of coordinated regulators	Coordinated Regulator	Coordinated Regulator	atf-7	unc-86	M00595_2.00	M02244_2.00	ALM	116	28.7785	4.03079	1.43e-41	6.06e-09	1.28e-15
co-occurence of coordinated regulators	Coordinated Regulator	Coordinated Regulator	unc-62	ceh-18	M02185_2.00	M00681_2.00	ALM	141	43.6055	3.23353	3.58e-41	7.36e-09	2.54e-16
co-occurence of coordinated regulators	Coordinated Regulator	Coordinated Regulator	ztf-3	ztf-9	M00640_2.00	M00636_2.00	ALM	110	26.1848	4.20091	9.09e-41	9.67e-11	7.72e-08
co-occurence of coordinated regulators	Coordinated Regulator	Coordinated Regulator	ceh-74	vab-3	M01248_2.00	M00342_2.00	ALM	107	25.3346	4.22347	1.03e-39	1.78e-08	4.51e-06
co-occurence of coordinated regulators	Coordinated Regulator	Coordinated Regulator	unc-62	ztf-9	M02185_2.00	M00636_2.00	ALM	106	25.0772	4.22695	2.52e-39	1.52e-08	5.86e-09
co-occurence of coordinated regulators	Coordinated Regulator	Coordinated Regulator	ceh-74	unc-86	M01248_2.00	M02244_2.00	ALM	94	19.3239	4.86445	2.69e-39	1.38e-09	1.82e-15
co-occurence of coordinated regulators	Coordinated Regulator	Coordinated Regulator	atf-7	ceh-18	M00595_2.00	M00681_2.00	ALM	141	46.1351	3.05624	2.29e-38	6.16e-11	1.77e-12
co-occurence of coordinated regulators	Coordinated Regulator	Coordinated Regulator	ceh-18	unc-86	M00681_2.00	M02244_2.00	ALM	130	39.2653	3.31081	2.76e-38	8.58e-20	2.75e-16
co-occurence of coordinated regulators	Coordinated Regulator	Coordinated Regulator	ztf-3	pag-3	M00640_2.00	M00619_2.00	ALM	144	48.6121	2.96223	7.58e-38	1.16e-12	5.5e-19
co-occurence of coordinated regulators	Coordinated Regulator	Coordinated Regulator	ceh-58	vab-3	M00676_2.00	M00342_2.00	ALM	125	36.6265	3.41283	7.65e-38	1.12e-14	5.05e-07
co-occurence of coordinated regulators	Coordinated Regulator	Coordinated Regulator	vab-3	ztf-3	M00342_2.00	M00640_2.00	ALM	126	37.2366	3.38377	7.94e-38	2.72e-05	9.04e-14
co-occurence of coordinated regulators	Coordinated Regulator	Coordinated Regulator	unc-62	unc-86	M02185_2.00	M02244_2.00	ALM	108	27.2006	3.9705	1.09e-37	1.85e-07	7.78e-16
co-occurence of coordinated regulators	Coordinated Regulator	Coordinated Regulator	hsf-1	ztf-3	M00682_2.00	M00640_2.00	ALM	157	58.1236	2.70114	2.26e-37	3.03e-23	1.06e-12
co-occurence of coordinated regulators	Coordinated Regulator	Coordinated Regulator	unc-86	ztf-3	M03312_2.00	M00640_2.00	ALM	170	67.9539	2.5017	2.92e-37	2.48e-23	5.56e-11
co-occurence of coordinated regulators	Coordinated Regulator	Coordinated Regulator	ceh-74	pag-3	M01248_2.00	M00619_2.00	ALM	117	33.0742	3.5375	1.85e-36	5.13e-09	1.04e-18
co-occurence of coordinated regulators	Coordinated Regulator	Coordinated Regulator	ceh-74	ztf-11	M01248_2.00	M00650_2.00	ALM	133	43.0832	3.08705	4.13e-36	2.24e-08	6.18e-22
co-occurence of coordinated regulators	Coordinated Regulator	Coordinated Regulator	ceh-74	hsf-1	M01248_2.00	M00682_2.00	ALM	127	39.5455	3.21149	7.44e-36	1.8e-08	5.74e-25
co-occurence of coordinated regulators	Coordinated Regulator	Coordinated Regulator	unc-62	vab-3	M02185_2.00	M00342_2.00	ALM	120	35.6615	3.36498	1.92e-35	4.08e-09	6.45e-07
co-occurence of coordinated regulators	Coordinated Regulator	Coordinated Regulator	atf-7	ztf-9	M00595_2.00	M00636_2.00	ALM	103	26.5319	3.88212	7.05e-35	2.29e-09	8.97e-09
co-occurence of coordinated regulators	Coordinated Regulator	Coordinated Regulator	ceh-58	ztf-9	M00676_2.00	M00636_2.00	ALM	101	25.7558	3.92145	1.74e-34	1.27e-12	1.14e-10
co-occurence of coordinated regulators	Coordinated Regulator	Coordinated Regulator	ztf-3	ztf-11	M00640_2.00	M00650_2.00	ALM	159	63.3232	2.51093	4.35e-34	8.25e-14	2.5e-21
co-occurence of coordinated regulators	Coordinated Regulator	Coordinated Regulator	atf-7	hsf-1	M00595_2.00	M00682_2.00	ALM	152	58.894	2.58091	1.94e-33	1.59e-11	1.39e-23
co-occurence of coordinated regulators	Coordinated Regulator	Coordinated Regulator	unc-86	vab-3	M02244_2.00	M00342_2.00	ALM	111	32.112	3.45666	2.19e-33	1.96e-16	1.52e-05
co-occurence of coordinated regulators	Coordinated Regulator	Coordinated Regulator	atf-7	vab-3	M00595_2.00	M00342_2.00	ALM	120	37.7302	3.18048	4.36e-33	3.11e-10	1.44e-06
co-occurence of coordinated regulators	Coordinated Regulator	Coordinated Regulator	ceh-74	unc-86	M01248_2.00	M03312_2.00	ALM	132	46.2338	2.85506	3.01e-32	3.77e-08	2.56e-25
co-occurence of coordinated regulators	Coordinated Regulator	Coordinated Regulator	atf-7	pag-3	M00595_2.00	M00619_2.00	ALM	136	49.2565	2.76106	6.07e-32	2.57e-11	2.4e-15
co-occurence of coordinated regulators	Coordinated Regulator	Coordinated Regulator	unc-62	pag-3	M02185_2.00	M00619_2.00	ALM	132	46.5558	2.83531	6.13e-32	3.12e-10	5.09e-18
co-occurence of coordinated regulators	Coordinated Regulator	Coordinated Regulator	unc-62	hsf-1	M02185_2.00	M00682_2.00	ALM	145	55.665	2.60487	7.51e-32	6.92e-09	2.19e-22
co-occurence of coordinated regulators	Coordinated Regulator	Coordinated Regulator	unc-86	ztf-9	M02244_2.00	M00636_2.00	ALM	91	22.5812	4.02991	1.29e-31	8.96e-12	5.99e-08
co-occurence of coordinated regulators	Coordinated Regulator	Coordinated Regulator	vab-3	ztf-9	M00342_2.00	M00636_2.00	ALM	104	29.6051	3.51291	1.43e-31	7.18e-06	2.82e-07
co-occurence of coordinated regulators	Coordinated Regulator	Coordinated Regulator	ceh-18	ztf-9	M00681_2.00	M00636_2.00	ALM	115	36.2001	3.17679	2.04e-31	1.14e-15	3.07e-08
co-occurence of coordinated regulators	Coordinated Regulator	Coordinated Regulator	ceh-18	pag-3	M00681_2.00	M00619_2.00	ALM	159	67.2054	2.36588	5.77e-31	2.39e-16	8.8e-19
co-occurence of coordinated regulators	Coordinated Regulator	Coordinated Regulator	atf-7	ztf-11	M00595_2.00	M00650_2.00	ALM	155	64.1626	2.41574	6.1e-31	1e-11	1.98e-20
co-occurence of coordinated regulators	Coordinated Regulator	Coordinated Regulator	unc-62	unc-86	M02185_2.00	M03312_2.00	ALM	156	65.0795	2.39707	8.04e-31	3.51e-08	2.45e-23
co-occurence of coordinated regulators	Coordinated Regulator	Coordinated Regulator	ceh-48	ceh-74	M01905_2.00	M01248_2.00	ALM	108	32.5602	3.31693	8.39e-31	6.5e-05	7.78e-08
co-occurence of coordinated regulators	Coordinated Regulator	Coordinated Regulator	ceh-48	ztf-3	M01905_2.00	M00640_2.00	ALM	132	47.8567	2.75824	1e-30	5.34e-05	1.26e-10
co-occurence of coordinated regulators	Coordinated Regulator	Coordinated Regulator	ceh-18	vab-3	M00681_2.00	M00342_2.00	ALM	137	51.479	2.66128	1.45e-30	1.38e-17	1.41e-05
co-occurence of coordinated regulators	Coordinated Regulator	Coordinated Regulator	ceh-18	unc-86	M00681_2.00	M03312_2.00	ALM	190	93.9452	2.02246	2.15e-30	1.45e-14	2.43e-23
co-occurence of coordinated regulators	Coordinated Regulator	Coordinated Regulator	ceh-58	pag-3	M00676_2.00	M00619_2.00	ALM	131	47.8156	2.73969	3.85e-30	8.08e-14	2.1e-21
co-occurence of coordinated regulators	Coordinated Regulator	Coordinated Regulator	unc-86	pag-3	M02244_2.00	M00619_2.00	ALM	122	41.9219	2.91017	4.63e-30	4.89e-16	5.77e-18
co-occurence of coordinated regulators	Coordinated Regulator	Coordinated Regulator	ceh-58	unc-86	M00676_2.00	M03312_2.00	ALM	157	66.8406	2.34887	4.65e-30	8.97e-12	6.25e-22
co-occurence of coordinated regulators	Coordinated Regulator	Coordinated Regulator	ceh-58	ztf-11	M00676_2.00	M00650_2.00	ALM	151	62.2858	2.42431	4.92e-30	2.72e-11	6.05e-21
co-occurence of coordinated regulators	Coordinated Regulator	Coordinated Regulator	atf-7	unc-86	M00595_2.00	M03312_2.00	ALM	159	68.8547	2.30921	1.02e-29	1.08e-10	1.82e-22
co-occurence of coordinated regulators	Coordinated Regulator	Coordinated Regulator	ceh-18	hsf-1	M00681_2.00	M00682_2.00	ALM	173	80.3549	2.15295	1.29e-29	4.32e-15	1.2e-22
co-occurence of coordinated regulators	Coordinated Regulator	Coordinated Regulator	ztf-9	pag-3	M00636_2.00	M00619_2.00	ALM	115	38.6493	2.97548	7.24e-29	3.61e-10	5.47e-15
co-occurence of coordinated regulators	Coordinated Regulator	Coordinated Regulator	ceh-18	ztf-11	M00681_2.00	M00650_2.00	ALM	179	87.5434	2.0447	3.11e-28	4e-15	3.35e-19
co-occurence of coordinated regulators	Coordinated Regulator	Coordinated Regulator	ceh-58	hsf-1	M00676_2.00	M00682_2.00	ALM	141	57.1713	2.46627	3.36e-28	2.71e-11	2.67e-25
co-occurence of coordinated regulators	Coordinated Regulator	Coordinated Regulator	unc-86	hsf-1	M02244_2.00	M00682_2.00	ALM	131	50.1244	2.6135	4.12e-28	1.21e-15	8.68e-23
co-occurence of coordinated regulators	Coordinated Regulator	Coordinated Regulator	unc-62	ztf-11	M02185_2.00	M00650_2.00	ALM	145	60.6447	2.39098	8.32e-28	9.88e-10	7.35e-18
co-occurence of coordinated regulators	Coordinated Regulator	Coordinated Regulator	unc-86	unc-86	M03312_2.00	M02244_2.00	ALM	141	58.6019	2.40607	4.36e-27	8.37e-24	3.16e-16
co-occurence of coordinated regulators	Coordinated Regulator	Coordinated Regulator	ceh-48	unc-62	M01905_2.00	M02185_2.00	ALM	123	45.8323	2.68369	4.57e-27	0.000396369	1.33e-08
co-occurence of coordinated regulators	Coordinated Regulator	Coordinated Regulator	unc-86	ztf-11	M02244_2.00	M00650_2.00	ALM	135	54.6085	2.47214	9.03e-27	7.02e-16	2.24e-17
co-occurence of coordinated regulators	Coordinated Regulator	Coordinated Regulator	ztf-9	ztf-11	M00636_2.00	M00650_2.00	ALM	129	50.3455	2.5623	9.35e-27	2.57e-09	7.95e-17
co-occurence of coordinated regulators	Coordinated Regulator	Coordinated Regulator	ceh-48	ceh-58	M01905_2.00	M00676_2.00	ALM	124	47.0726	2.63423	1.38e-26	2.11e-06	2.82e-11
co-occurence of coordinated regulators	Coordinated Regulator	Coordinated Regulator	atf-7	ceh-48	M00595_2.00	M01905_2.00	ALM	126	48.491	2.59842	1.48e-26	5.32e-09	0.000590644
co-occurence of coordinated regulators	Coordinated Regulator	Coordinated Regulator	ceh-38	ztf-3	M03716_2.00	M00640_2.00	ALM	125	48.1951	2.59362	3.19e-26	6.91e-09	3.95e-11
co-occurence of coordinated regulators	Coordinated Regulator	Coordinated Regulator	hsf-1	ztf-9	M00682_2.00	M00636_2.00	ALM	122	46.2114	2.64004	3.75e-26	1.54e-20	1.92e-08
co-occurence of coordinated regulators	Coordinated Regulator	Coordinated Regulator	unc-86	ztf-9	M03312_2.00	M00636_2.00	ALM	132	54.0271	2.44322	1.58e-25	4.28e-23	4.79e-09
co-occurence of coordinated regulators	Coordinated Regulator	Coordinated Regulator	unc-86	hsf-1	M03312_2.00	M00682_2.00	ALM	208	119.926	1.7344	3.51e-25	4.94e-21	1.3e-20
co-occurence of coordinated regulators	Coordinated Regulator	Coordinated Regulator	ceh-38	unc-62	M03716_2.00	M02185_2.00	ALM	120	46.1565	2.59985	4.81e-25	8.52e-08	1.1e-08
co-occurence of coordinated regulators	Coordinated Regulator	Coordinated Regulator	ceh-38	ceh-74	M03716_2.00	M01248_2.00	ALM	99	32.7905	3.01917	8.88e-25	7.59e-09	3.6e-08
co-occurence of coordinated regulators	Coordinated Regulator	Coordinated Regulator	vab-3	pag-3	M00342_2.00	M00619_2.00	ALM	131	54.9619	2.38347	2.88e-24	3.43e-06	1.46e-18
co-occurence of coordinated regulators	Coordinated Regulator	Coordinated Regulator	vab-3	hsf-1	M00342_2.00	M00682_2.00	ALM	144	65.7158	2.19125	1.25e-23	2.51e-06	8.97e-24
co-occurence of coordinated regulators	Coordinated Regulator	Coordinated Regulator	ceh-38	ceh-58	M03716_2.00	M00676_2.00	ALM	119	47.4055	2.51026	1.79e-23	1.18e-10	2.92e-12
co-occurence of coordinated regulators	Coordinated Regulator	Coordinated Regulator	ceh-48	ceh-18	M01905_2.00	M00681_2.00	ALM	144	66.1611	2.17651	2.46e-23	0.000133547	1.67e-12
co-occurence of coordinated regulators	Coordinated Regulator	Coordinated Regulator	hsf-1	pag-3	M00682_2.00	M00619_2.00	ALM	167	85.7916	1.94658	6.34e-23	4.47e-21	5.67e-17
co-occurence of coordinated regulators	Coordinated Regulator	Coordinated Regulator	unc-86	vab-3	M03312_2.00	M00342_2.00	ALM	156	76.8302	2.03045	1.03e-22	9.26e-23	1.7e-05
co-occurence of coordinated regulators	Coordinated Regulator	Coordinated Regulator	ceh-48	ztf-9	M01905_2.00	M00636_2.00	ALM	103	38.0487	2.70706	2.93e-22	7.38e-05	1.44e-08
co-occurence of coordinated regulators	Coordinated Regulator	Coordinated Regulator	ceh-38	ztf-9	M03716_2.00	M00636_2.00	ALM	103	38.3178	2.68805	4.98e-22	4.17e-08	1.15e-08
co-occurence of coordinated regulators	Coordinated Regulator	Coordinated Regulator	unc-86	pag-3	M03312_2.00	M00619_2.00	ALM	181	100.301	1.80456	8.29e-22	4.07e-21	4.27e-16
co-occurence of coordinated regulators	Coordinated Regulator	Coordinated Regulator	ceh-38	ceh-48	M03716_2.00	M01905_2.00	ALM	145	70.0315	2.0705	2.24e-21	3e-08	4.34e-05
co-occurence of coordinated regulators	Coordinated Regulator	Coordinated Regulator	ceh-48	unc-86	M01905_2.00	M02244_2.00	ALM	106	41.2705	2.56842	3.02e-21	5.11e-05	3.12e-13
co-occurence of coordinated regulators	Coordinated Regulator	Coordinated Regulator	vab-3	ztf-11	M00342_2.00	M00650_2.00	ALM	145	71.5947	2.02529	1.95e-20	4.83e-06	1.47e-18
co-occurence of coordinated regulators	Coordinated Regulator	Coordinated Regulator	atf-7	ceh-38	M00595_2.00	M03716_2.00	ALM	115	48.834	2.35492	2.78e-20	2.6e-10	2.9e-07
co-occurence of coordinated regulators	Coordinated Regulator	Coordinated Regulator	pag-3	ztf-11	M00619_2.00	M00650_2.00	ALM	170	93.4664	1.81884	3.77e-20	5.07e-16	3.88e-19
co-occurence of coordinated regulators	Coordinated Regulator	Coordinated Regulator	ceh-38	ceh-18	M03716_2.00	M00681_2.00	ALM	138	66.629	2.07117	4.88e-20	2.45e-09	9.73e-14
co-occurence of coordinated regulators	Coordinated Regulator	Coordinated Regulator	unc-86	ztf-11	M03312_2.00	M00650_2.00	ALM	208	130.655	1.59198	7.84e-20	1.99e-20	3.97e-19
co-occurence of coordinated regulators	Coordinated Regulator	Coordinated Regulator	hsf-1	ztf-11	M00682_2.00	M00650_2.00	ALM	188	111.754	1.68226	2.33e-19	2.91e-21	2.69e-19
co-occurence of coordinated regulators	Coordinated Regulator	Coordinated Regulator	ceh-48	pag-3	M01905_2.00	M00619_2.00	ALM	141	70.6374	1.99611	4.23e-19	0.000151769	1.09e-14
co-occurence of coordinated regulators	Coordinated Regulator	Coordinated Regulator	ceh-38	unc-86	M03716_2.00	M02244_2.00	ALM	102	41.5624	2.45414	6.49e-19	7.69e-09	3.54e-13
co-occurence of coordinated regulators	Coordinated Regulator	Coordinated Regulator	ceh-48	hsf-1	M01905_2.00	M00682_2.00	ALM	156	84.4584	1.84706	1.99e-18	0.000706114	2.81e-19
co-occurence of coordinated regulators	Coordinated Regulator	Coordinated Regulator	ceh-48	vab-3	M01905_2.00	M00342_2.00	ALM	116	54.1078	2.14387	2.79e-17	8.7e-05	4.03e-05
co-occurence of coordinated regulators	Coordinated Regulator	Coordinated Regulator	ceh-38	vab-3	M03716_2.00	M00342_2.00	ALM	114	54.4905	2.09211	3.87e-16	1.94e-07	4.47e-05
co-occurence of coordinated regulators	Coordinated Regulator	Coordinated Regulator	ceh-48	ztf-11	M01905_2.00	M00650_2.00	ALM	159	92.0139	1.728	5.11e-16	0.000534934	1.5e-17
co-occurence of coordinated regulators	Coordinated Regulator	Coordinated Regulator	ceh-48	unc-86	M01905_2.00	M03312_2.00	ALM	165	98.7427	1.67101	1.98e-15	0.000683253	1.2e-20
co-occurence of coordinated regulators	Coordinated Regulator	Coordinated Regulator	ceh-38	pag-3	M03716_2.00	M00619_2.00	ALM	132	71.137	1.85557	6.81e-15	2.19e-08	3.4e-14
co-occurence of coordinated regulators	Coordinated Regulator	Coordinated Regulator	ceh-38	unc-86	M03716_2.00	M03312_2.00	ALM	157	99.441	1.57883	4.09e-12	5.79e-08	8.25e-21
co-occurence of coordinated regulators	Coordinated Regulator	Coordinated Regulator	ceh-38	hsf-1	M03716_2.00	M00682_2.00	ALM	140	85.0557	1.64598	9.51e-12	7.11e-09	3.48e-20
co-occurence of coordinated regulators	Coordinated Regulator	Coordinated Regulator	ceh-38	ztf-11	M03716_2.00	M00650_2.00	ALM	145	92.6647	1.56478	1.5e-10	1.3e-08	2.65e-20
co-occurence of coordinated regulators	Coordinated Regulator	Coordinated Regulator	unc-86	ztf-11	M03312_2.00	M00650_2.00	ALN	51	29.2313	1.74471	5.11e-08	0.00226942	9.36e-05
co-occurence of coordinated regulators	Coordinated Regulator	Coordinated Regulator	ztf-9	ztf-11	M00636_2.00	M00650_2.00	ALN	30	11.2637	2.66342	8.07e-08	0.00457729	3.61e-06
co-occurence of coordinated regulators	Coordinated Regulator	Coordinated Regulator	ceh-58	ceh-18	M00676_2.00	M00681_2.00	ALN	27	10.0198	2.69466	4.21e-07	0.0171933	0.00707259
co-occurence of coordinated regulators	Coordinated Regulator	Coordinated Regulator	ceh-18	unc-86	M00681_2.00	M03312_2.00	ALN	41	21.0182	1.95069	4.28e-07	0.0427668	0.000711442
co-occurence of coordinated regulators	Coordinated Regulator	Coordinated Regulator	ceh-58	ztf-9	M00676_2.00	M00636_2.00	ALN	20	5.76231	3.47083	5.1e-07	0.00398273	0.00673031
co-occurence of coordinated regulators	Coordinated Regulator	Coordinated Regulator	ceh-18	ztf-11	M00681_2.00	M00650_2.00	ALN	39	19.586	1.99122	6.83e-07	0.0155471	0.00021631
co-occurence of coordinated regulators	Coordinated Regulator	Coordinated Regulator	unc-86	ztf-9	M03312_2.00	M00636_2.00	ALN	29	12.0874	2.39919	1.45e-06	5.29e-05	0.00129558
co-occurence of coordinated regulators	Coordinated Regulator	Coordinated Regulator	ceh-18	ztf-9	M00681_2.00	M00636_2.00	ALN	23	8.099	2.83986	1.85e-06	0.00723242	0.0270476
co-occurence of coordinated regulators	Coordinated Regulator	Coordinated Regulator	ceh-58	ztf-11	M00676_2.00	M00650_2.00	ALN	29	13.9351	2.08107	2.64e-05	0.00736917	1.93e-05
co-occurence of coordinated regulators	Coordinated Regulator	Coordinated Regulator	ceh-58	unc-86	M00676_2.00	M03312_2.00	ALN	30	14.9542	2.00613	3.6e-05	0.0150518	4.97e-05
co-occurence of coordinated regulators	Coordinated Regulator	Coordinated Regulator	ceh-74	ztf-3	M01248_2.00	M00640_2.00	AQR	73	17.7742	4.10707	3.81e-26	0.00480207	4.27e-06
co-occurence of coordinated regulators	Coordinated Regulator	Coordinated Regulator	ceh-74	unc-62	M01248_2.00	M02185_2.00	AQR	68	17.0224	3.99474	1.47e-23	0.0422264	8.91e-05
co-occurence of coordinated regulators	Coordinated Regulator	Coordinated Regulator	unc-86	ztf-3	M02244_2.00	M00640_2.00	AQR	78	22.5291	3.4622	2.13e-23	1.36e-06	6.36e-05
co-occurence of coordinated regulators	Coordinated Regulator	Coordinated Regulator	unc-62	ztf-3	M02185_2.00	M00640_2.00	AQR	81	25.0193	3.2375	1.55e-22	1.53e-05	3.06e-05
co-occurence of coordinated regulators	Coordinated Regulator	Coordinated Regulator	lin-39	ztf-3	M08211_2.00	M00640_2.00	AQR	92	32.5407	2.82723	7.35e-22	8.09e-06	1.32e-05
co-occurence of coordinated regulators	Coordinated Regulator	Coordinated Regulator	ceh-74	egl-13	M01248_2.00	M00710_2.00	AQR	89	31.0268	2.86849	1.85e-21	0.00676728	1e-08
co-occurence of coordinated regulators	Coordinated Regulator	Coordinated Regulator	ceh-74	ztf-11	M01248_2.00	M00650_2.00	AQR	93	34.1745	2.72133	5.56e-21	0.0298305	3.87e-11
co-occurence of coordinated regulators	Coordinated Regulator	Coordinated Regulator	egl-13	ztf-3	M00710_2.00	M00640_2.00	AQR	109	45.6029	2.3902	7.44e-21	8.2e-11	2.65e-05
co-occurence of coordinated regulators	Coordinated Regulator	Coordinated Regulator	ceh-74	lin-39	M01248_2.00	M08211_2.00	AQR	72	22.1397	3.25208	6.38e-20	0.0184905	6.75e-06
co-occurence of coordinated regulators	Coordinated Regulator	Coordinated Regulator	ztf-3	ztf-9	M00640_2.00	M00636_2.00	AQR	69	20.7703	3.32205	1.58e-19	5.31e-05	9.89e-05
co-occurence of coordinated regulators	Coordinated Regulator	Coordinated Regulator	ztf-3	ztf-11	M00640_2.00	M00650_2.00	AQR	112	50.2293	2.22977	3.61e-19	4.21e-05	7.35e-12
co-occurence of coordinated regulators	Coordinated Regulator	Coordinated Regulator	ceh-74	unc-86	M01248_2.00	M02244_2.00	AQR	58	15.3281	3.78391	7.28e-19	0.00111615	7.98e-07
co-occurence of coordinated regulators	Coordinated Regulator	Coordinated Regulator	unc-86	ztf-3	M03312_2.00	M00640_2.00	AQR	116	53.9024	2.15204	8.34e-19	1.18e-19	9.5e-06
co-occurence of coordinated regulators	Coordinated Regulator	Coordinated Regulator	ceh-74	unc-86	M01248_2.00	M03312_2.00	AQR	92	36.6736	2.50862	2.42e-18	0.0199951	1.7e-14
co-occurence of coordinated regulators	Coordinated Regulator	Coordinated Regulator	daf-19	ztf-3	M00709_2.00	M00640_2.00	AQR	58	15.7587	3.68051	2.61e-18	0.000252729	0.000119489
co-occurence of coordinated regulators	Coordinated Regulator	Coordinated Regulator	ceh-74	daf-19	M01248_2.00	M00709_2.00	AQR	46	10.7217	4.29036	5.51e-17	0.0168512	9.87e-06
co-occurence of coordinated regulators	Coordinated Regulator	Coordinated Regulator	unc-62	ztf-9	M02185_2.00	M00636_2.00	AQR	63	19.8917	3.16714	9.47e-17	0.00403551	7.85e-05
co-occurence of coordinated regulators	Coordinated Regulator	Coordinated Regulator	unc-86	ztf-11	M02244_2.00	M00650_2.00	AQR	98	43.3166	2.26241	1.17e-16	1.14e-06	6.28e-12
co-occurence of coordinated regulators	Coordinated Regulator	Coordinated Regulator	egl-13	ztf-11	M00710_2.00	M00650_2.00	AQR	150	87.6806	1.71076	1.52e-16	4.45e-08	9.41e-10
co-occurence of coordinated regulators	Coordinated Regulator	Coordinated Regulator	unc-62	unc-86	M02185_2.00	M02244_2.00	AQR	65	21.5761	3.0126	3.04e-16	1.75e-05	2.98e-06
co-occurence of coordinated regulators	Coordinated Regulator	Coordinated Regulator	unc-86	lin-39	M02244_2.00	M08211_2.00	AQR	75	28.0623	2.67262	4.81e-16	4.08e-07	6.82e-06
co-occurence of coordinated regulators	Coordinated Regulator	Coordinated Regulator	ceh-58	ztf-3	M00676_2.00	M00640_2.00	AQR	71	25.6964	2.76304	7.28e-16	6.07e-05	1.66e-06
co-occurence of coordinated regulators	Coordinated Regulator	Coordinated Regulator	unc-62	lin-39	M02185_2.00	M08211_2.00	AQR	79	31.1642	2.53496	1.09e-15	5.36e-05	5.82e-05
co-occurence of coordinated regulators	Coordinated Regulator	Coordinated Regulator	lin-39	ztf-11	M08211_2.00	M00650_2.00	AQR	120	62.5659	1.91798	1.38e-15	4.16e-05	1.2e-11
co-occurence of coordinated regulators	Coordinated Regulator	Coordinated Regulator	unc-86	ztf-11	M03312_2.00	M00650_2.00	AQR	164	103.638	1.58243	1.42e-15	1.42e-13	4.04e-10
co-occurence of coordinated regulators	Coordinated Regulator	Coordinated Regulator	unc-86	egl-13	M02244_2.00	M00710_2.00	AQR	90	39.3269	2.28851	2.26e-15	1.73e-07	4.8e-10
co-occurence of coordinated regulators	Coordinated Regulator	Coordinated Regulator	lin-39	ztf-9	M08211_2.00	M00636_2.00	AQR	70	25.8716	2.70567	3.6e-15	0.000168348	0.000558641
co-occurence of coordinated regulators	Coordinated Regulator	Coordinated Regulator	lin-39	egl-13	M08211_2.00	M00710_2.00	AQR	112	56.8032	1.97172	4.25e-15	6.41e-06	2.79e-08
co-occurence of coordinated regulators	Coordinated Regulator	Coordinated Regulator	unc-62	ztf-11	M02185_2.00	M00650_2.00	AQR	101	48.1046	2.09959	4.7e-15	9.16e-06	2.78e-10
co-occurence of coordinated regulators	Coordinated Regulator	Coordinated Regulator	unc-62	egl-13	M02185_2.00	M00710_2.00	AQR	95	43.6739	2.17521	5.91e-15	3.44e-05	1.98e-07
co-occurence of coordinated regulators	Coordinated Regulator	Coordinated Regulator	unc-86	ztf-9	M02244_2.00	M00636_2.00	AQR	56	17.9118	3.12642	1.28e-14	0.000101687	0.0016989
co-occurence of coordinated regulators	Coordinated Regulator	Coordinated Regulator	unc-86	lin-39	M03312_2.00	M08211_2.00	AQR	123	67.1412	1.83196	1.58e-14	2.68e-14	0.000198469
co-occurence of coordinated regulators	Coordinated Regulator	Coordinated Regulator	ztf-9	ztf-11	M00636_2.00	M00650_2.00	AQR	88	39.935	2.20358	5.19e-14	0.000717535	2.05e-09
co-occurence of coordinated regulators	Coordinated Regulator	Coordinated Regulator	unc-86	unc-86	M03312_2.00	M02244_2.00	AQR	96	46.4842	2.06522	1.03e-13	3.44e-14	2.72e-07
co-occurence of coordinated regulators	Coordinated Regulator	Coordinated Regulator	ceh-58	unc-86	M00676_2.00	M02244_2.00	AQR	61	22.1599	2.75271	1.77e-13	0.000344162	1.57e-07
co-occurence of coordinated regulators	Coordinated Regulator	Coordinated Regulator	unc-86	egl-13	M03312_2.00	M00710_2.00	AQR	149	94.0924	1.58355	3.73e-13	1.21e-15	2.49e-08
co-occurence of coordinated regulators	Coordinated Regulator	Coordinated Regulator	unc-62	unc-86	M02185_2.00	M03312_2.00	AQR	101	51.6224	1.95652	4.77e-13	4.8e-05	1.79e-13
co-occurence of coordinated regulators	Coordinated Regulator	Coordinated Regulator	ceh-58	unc-62	M00676_2.00	M02185_2.00	AQR	64	24.6094	2.60063	4.83e-13	0.0062276	1.87e-07
co-occurence of coordinated regulators	Coordinated Regulator	Coordinated Regulator	egl-13	daf-19	M00710_2.00	M00709_2.00	AQR	68	27.5084	2.47197	7.5e-13	0.000365373	2.6e-06
[truncated: 13,609 more rows]

## Sheet: Supp.Table.2E.Term selec_by_TF
Coordinated Regulator (candidate terminal selector)	predicted target neuron classes (ordered by rank sum test p value)
[truncated: 129 more rows]

## Sheet: 2F.coord_regs_by_neuron
neuron class	candidate terminal selectors ordered by rank sums test p value
[truncated: 117 more rows]

[truncated: 1 more sheets: 2G_Top_common term selec_neuron]
