# Supplementary material for: In silico analysis of the transcriptional regulatory logic of neuronal identity specification throughout the C. elegans nervous system
Source: eLife. 2021 Jun 24;10:e64906. doi: 10.7554/eLife.64906 (PMC8225391; doi:10.7554/eLife.64906)
Supplement: Supplementary file 3. — (A) Brain Atlas single factor motif analysis results. (B) Cofactor results. (C) Agreement of top two regulators between datasets. [file elife-64906-supp3.xlsx]

## Sheet: Supp.Table.3A.BrainAtlasResults
motif signature	TF	motif_ID	neuron_class	reporter gene count	observed genes with motif match	expected genes with motif match	fold change enrichment	hypergeometric test p value (corrected)	Wilcoxon rank sums test p value (corrected)
Coordinated Regulator	cfi-1	M01667_2.00	AVD	66	52	38.16	1.36268	0.000605583	0.00336906
Coordinated Regulator	cfi-1	M01667_2.00	DA	78	62	45.0982	1.37478	0.000133575	0.000108344
Coordinated Regulator	cfi-1	M01667_2.00	IL2	62	45	35.8473	1.25532	0.0140644	0.0272524
Other	cfi-1	M01667_2.00	LUA	50	38	28.9091	1.31446	0.00755525	0.0566016
Coordinated Regulator	cfi-1	M01667_2.00	PVC	80	65	46.2546	1.40527	3.09835e-05	8.78183e-06
Other	cfi-1	M01667_2.00	RIP	36	27	20.8146	1.29717	0.0281152	0.163976
Other	cfi-1	M01667_2.00	URA	46	36	26.5964	1.35357	0.00436639	0.150332
Other	lin-15B	M09654_2.0	ADF	114	55	38.2383	1.43835	0.00143194	0.983233
Other	lin-15B	M09654_2.0	AIN	50	27	16.7712	1.60991	0.00344065	0.497297
Other	lin-15B	M09654_2.0	AIY	108	63	36.2257	1.73909	1.06501e-06	0.55506
Other	lin-15B	M09654_2.0	CAN	89	45	29.8527	1.5074	0.00124256	0.707823
Other	lin-15B	M09654_2.0	DA	78	40	26.163	1.52887	0.00159277	0.346153
Other	lin-15B	M09654_2.0	DB	63	36	21.1317	1.7036	0.000264395	0.323354
Other	lin-15B	M09654_2.0	DD	55	28	18.4483	1.51776	0.00757174	0.174888
Other	lin-15B	M09654_2.0	DVB	46	21	15.4295	1.36103	0.0621593	0.788184
Other	lin-15B	M09654_2.0	HSN	122	68	40.9217	1.66171	2.98076e-06	0.0514379
Other	lin-15B	M09654_2.0	I4	42	20	14.0878	1.41967	0.0441428	0.870156
Other	lin-15B	M09654_2.0	M2	43	23	14.4232	1.59465	0.00726678	0.846909
Other	lin-15B	M09654_2.0	NSM	78	45	26.163	1.71998	3.92028e-05	0.611153
Other	lin-15B	M09654_2.0	VA	67	33	22.4734	1.4684	0.00732549	0.220735
Other	lin-15B	M09654_2.0	VB	61	31	20.4608	1.51509	0.00544923	0.210487
Other	lin-15B	M09654_2.0	VD	49	26	16.4358	1.58192	0.00527009	0.3602
Other	mdl-1	M08183_2.00	ADF	114	55	30.9197	1.7788	7.22327e-06	0.66777
Other	mdl-1	M08183_2.00	ASG	101	42	27.3937	1.5332	0.00193992	0.211662
Other	mdl-1	M08183_2.00	ASH	179	64	48.5493	1.31825	0.00878637	0.80272
Other	mdl-1	M08183_2.00	ASI	254	86	68.8912	1.24835	0.0125508	0.695183
Other	mdl-1	M08183_2.00	ASK	171	61	46.3795	1.31524	0.0107436	0.189792
Other	mdl-1	M08183_2.00	AVG	60	24	16.2735	1.47479	0.0235871	0.314444
Other	mdl-1	M08183_2.00	AVJ	40	16	10.849	1.47479	0.0560832	0.295591
Other	mdl-1	M08183_2.00	CAN	89	44	24.139	1.82277	2.54035e-05	0.174888
Other	mdl-1	M08183_2.00	CEP	69	27	18.7145	1.44273	0.0229024	0.238672
Other	mdl-1	M08183_2.00	DVA	75	37	20.3419	1.81891	0.000105462	0.171443
Other	mdl-1	M08183_2.00	PHA	163	63	44.2097	1.42503	0.00153166	0.945142
Other	mdl-1	M08183_2.00	PHB	160	59	43.396	1.35957	0.00590969	0.493499
Other	mdl-1	M08183_2.00	PVP	51	22	13.8325	1.59046	0.0121313	0.658553
Other	mdl-1	M08183_2.00	RIA	56	25	15.1886	1.64597	0.00508169	0.425165
Other	mdl-1	M08183_2.00	RIC	55	28	14.9174	1.877	0.000363511	0.563532
Other	mdl-1	M08183_2.00	RIM	64	27	17.3584	1.55544	0.00842926	0.478205
Other	mdl-1	M08183_2.00	SIA	58	23	15.7311	1.46208	0.0287087	0.189792
Other	mdl-1	M08183_2.00	SMB	40	15	10.849	1.38261	0.102554	0.139999
Other	mdl-1	M08183_2.00	SMD	68	30	18.4433	1.62661	0.00294203	0.191282
Other	hlh-30	M00937_2.00	ADF	114	44	26.4037	1.66643	0.000373735	0.871637
Other	hlh-30	M00937_2.00	ASK	171	56	39.6056	1.41394	0.0038319	0.318673
Other	hlh-30	M00937_2.00	AVD	66	25	15.2864	1.63545	0.00679756	0.658137
Other	hlh-30	M00937_2.00	AVJ	40	14	9.26446	1.51115	0.0639272	0.348741
Other	hlh-30	M00937_2.00	AVM	93	34	21.5399	1.57847	0.00362429	0.295731
Other	hlh-30	M00937_2.00	AWC	161	63	37.2894	1.68949	1.87009e-05	0.655391
Other	hlh-30	M00937_2.00	BDU	68	21	15.7496	1.33337	0.0919405	0.274644
Other	hlh-30	M00937_2.00	DA	78	31	18.0657	1.71596	0.00140816	0.82388
Other	hlh-30	M00937_2.00	HSN	122	44	28.2566	1.55716	0.00152329	0.957456
Other	hlh-30	M00937_2.00	PLM	133	48	30.8043	1.55822	0.000980639	0.530009
Other	hlh-30	M00937_2.00	PVT	153	34	35.4365	0.959461	0.640026	0.139272
Other	hlh-30	M00937_2.00	PVW	40	11	9.26446	1.18733	0.314002	0.259395
Other	hlh-11	M00931_2.00	CAN	89	48	28.1696	1.70396	4.09235e-05	0.538943
Other	hlh-11	M00931_2.00	DB	63	34	19.9403	1.70509	0.000453989	0.715694
Other	hlh-11	M00931_2.00	I4	42	22	13.2935	1.65494	0.00575485	0.147313
Other	hlh-11	M00931_2.00	IL2	62	33	19.6238	1.68163	0.000712299	0.218813
Other	hlh-11	M00931_2.00	NSM	78	45	24.688	1.82275	1.00351e-05	0.305068
Other	hlh-11	M00931_2.00	PDB	38	20	12.0275	1.66286	0.00757174	0.944796
Other	mxl-3	M00935_2.00	ADF	114	44	27.0107	1.62898	0.000581635	0.0500973
Other	mxl-3	M00935_2.00	ADL	190	56	45.0179	1.24395	0.0418616	0.990193
Other	mxl-3	M00935_2.00	ASE	169	55	40.0423	1.37355	0.00717287	0.0569918
Other	mxl-3	M00935_2.00	AVL	41	15	9.71439	1.5441	0.0472707	0.405885
Other	mxl-3	M00935_2.00	AWC	161	56	38.1468	1.46801	0.0016475	0.276227
Other	mxl-3	M00935_2.00	SDQ	63	26	14.927	1.74181	0.00238671	0.724734
Coordinated Regulator	hlh-10	M00930_2.00	ASE	169	85	59.8657	1.41984	0.000143165	0.000284846
Other	hlh-10	M00930_2.00	RIC	55	32	19.4829	1.64246	0.000936281	0.0618667
Other	hlh-10	M00930_2.00	RIG	58	27	20.5456	1.31415	0.0560768	0.0898468
Coordinated Regulator	hlh-4	OH2018_HLH-4	ADL	190	152	77.6301	1.958	3.18028e-25	5.35375e-11
Coordinated Regulator	hlh-16	M00589_2.00	AIY	108	74	42.3422	1.74767	2.84973e-08	0.00132345
Other	hlh-16	M00589_2.00	SIA	58	42	22.7393	1.84702	2.46821e-06	0.330554
Other	hlh-16	M00589_2.00	SIB	48	30	18.8188	1.59415	0.00160718	0.610589
Coordinated Regulator	hlh-16	M00589_2.00	SMD	68	46	26.6599	1.72544	1.05464e-05	0.0439821
Other	xbp-1	M00597_2.00	AIZ	54	33	13.8749	2.3784	5.05432e-07	0.073034
Other	xbp-1	M00597_2.00	AVB	57	28	14.6457	1.91182	0.000305822	0.329867
Other	xbp-1	M00597_2.00	AVG	60	29	15.4165	1.8811	0.000328193	0.378235
Other	xbp-1	M00597_2.00	AVH	35	19	8.99298	2.11276	0.000625344	0.497232
Other	xbp-1	M00597_2.00	AVJ	40	20	10.2777	1.94596	0.00148867	0.105462
Other	xbp-1	M00597_2.00	DVB	46	27	11.8193	2.28439	1.17852e-05	0.0761079
Other	xbp-1	M00597_2.00	DVC	49	24	12.5902	1.90625	0.000783629	0.472685
Coordinated Regulator	xbp-1	M00597_2.00	M5	50	22	12.8471	1.71245	0.00525565	0.0390753
Other	xbp-1	M00597_2.00	PLN	51	23	13.1041	1.75518	0.00318113	0.621989
Other	xbp-1	M00597_2.00	PVP	51	27	13.1041	2.06043	9.43824e-05	0.3245
Other	xbp-1	M00597_2.00	PVR	54	29	13.8749	2.09011	4.00908e-05	0.749422
Other	xbp-1	M00597_2.00	PVW	40	23	10.2777	2.23786	6.67802e-05	0.842391
Other	xbp-1	M00597_2.00	RID	53	22	13.6179	1.61552	0.0107768	0.438647
Other	xbp-1	M00597_2.00	RIF	53	26	13.6179	1.90925	0.000485872	0.164748
Other	xbp-1	M00597_2.00	RIV	54	27	13.8749	1.94596	0.000280943	0.197361
Other	xbp-1	M00597_2.00	RMF	37	19	9.50687	1.99856	0.00133794	0.421399
Other	xbp-1	M00597_2.00	SIA	58	29	14.9027	1.94596	0.000171492	0.0616461
Other	xbp-1	M00597_2.00	SIB	48	22	12.3332	1.7838	0.00308221	0.226416
Other	xbp-1	M00597_2.00	SMB	40	19	10.2777	1.84866	0.00358034	0.369547
Other	xbp-1	M00597_2.00	SMD	68	36	17.4721	2.06043	8.60447e-06	0.592675
Coordinated Regulator	xbp-1	M00597_2.00	VB	61	33	15.6735	2.10547	1.15731e-05	0.0190241
Coordinated Regulator	atf-7	M00595_2.00	AFD	96	52	32.5016	1.59992	0.000103645	0.00105706
Coordinated Regulator	atf-7	M00595_2.00	AIM	62	37	20.9906	1.76269	8.94056e-05	0.00146652
Coordinated Regulator	atf-7	M00595_2.00	AIZ	54	32	18.2822	1.75034	0.000293153	0.000511948
Coordinated Regulator	atf-7	M00595_2.00	ALM	125	70	42.3198	1.65407	2.49254e-06	0.00133434
Coordinated Regulator	atf-7	M00595_2.00	ASG	101	51	34.1944	1.49147	0.00081941	8.04177e-05
Coordinated Regulator	atf-7	M00595_2.00	AWA	85	44	28.7775	1.52897	0.000971242	0.000313748
Coordinated Regulator	atf-7	M00595_2.00	AWC	161	83	54.508	1.52271	1.38549e-05	0.00107116
Coordinated Regulator	atf-7	M00595_2.00	PLM	133	76	45.0283	1.68783	3.97045e-07	0.000262258
Coordinated Regulator	atf-7	M00595_2.00	PVW	40	20	13.5424	1.47685	0.0283871	0.0334094
Coordinated Regulator	atf-7	M00595_2.00	RIA	56	28	18.9593	1.47685	0.0113017	0.000262652
Coordinated Regulator	atf-7	M00595_2.00	RIG	58	29	19.6364	1.47685	0.0101467	0.00697773
Coordinated Regulator	atf-7	M00595_2.00	VB	61	33	20.6521	1.5979	0.00158966	0.0460674
Coordinated Regulator	cebp-1	M00604_2.00	AIZ	54	47	35.4921	1.32424	0.000742787	2.52042e-06
Coordinated Regulator	cebp-1	M00604_2.00	DD	55	46	36.1493	1.2725	0.0038319	1.43273e-05
Piecemeal Regulator	cebp-1	M00604_2.00	MC	37	27	24.3187	1.11026	0.229686	0.023158
Other	cebp-1	M00604_2.00	MI	40	30	26.2904	1.1411	0.144651	0.0936015
Coordinated Regulator	cebp-1	M00604_2.00	PDE	73	57	47.98	1.18799	0.0179341	1.2087e-05
Coordinated Regulator	cebp-1	M00604_2.00	SIA	58	46	38.1211	1.20668	0.0204644	6.19876e-06
Coordinated Regulator	cebp-1	M00604_2.00	SIB	48	39	31.5485	1.23619	0.0166793	0.00025179
Coordinated Regulator	cebp-1	M00604_2.00	SMB	40	32	26.2904	1.21717	0.0404092	0.000272435
Coordinated Regulator	cebp-1	M00604_2.00	VB	61	51	40.0929	1.27205	0.00248206	0.000118962
Coordinated Regulator	cebp-1	M00604_2.00	VD	49	42	32.2058	1.30411	0.00238732	6.61337e-05
Other	crh-2	M00603_2.00	AIB	54	28	16.2693	1.72103	0.00126978	0.0998705
Other	crh-2	M00603_2.00	AIZ	54	31	16.2693	1.90543	9.0663e-05	0.172664
Other	crh-2	M00603_2.00	DB	63	39	18.9809	2.0547	1.61927e-06	0.200206
Other	crh-2	M00603_2.00	RIG	58	25	17.4745	1.43066	0.0275709	0.636737
Other	crh-2	M00603_2.00	SMB	40	22	12.0514	1.82552	0.00159139	0.776868
Other	crh-2	M00603_2.00	VB	61	39	18.3783	2.12207	5.79788e-07	0.152601
Other	2020-06-01	M00599_2.00	ADA	47	23	14.4434	1.59243	0.00870264	0.747077
Coordinated Regulator	2020-06-01	M00599_2.00	ADF	114	53	35.0328	1.51287	0.000618876	0.00739658
Other	2020-06-01	M00599_2.00	AIM	62	31	19.053	1.62704	0.00194911	0.478205
Other	2020-06-01	M00599_2.00	AIN	50	31	15.3653	2.01754	2.17484e-05	0.405885
Coordinated Regulator	2020-06-01	M00599_2.00	AIZ	54	31	16.5945	1.86809	0.000129267	0.0444668
Coordinated Regulator	2020-06-01	M00599_2.00	ASG	101	45	31.0379	1.44984	0.00349416	0.00253006
Coordinated Regulator	2020-06-01	M00599_2.00	ASH	179	77	55.0077	1.3998	0.000698227	0.0248751
Other	2020-06-01	M00599_2.00	ASJ	147	62	45.1739	1.37247	0.00324286	0.0646212
Other	2020-06-01	M00599_2.00	ASK	171	74	52.5493	1.4082	0.000714466	0.141099
Coordinated Regulator	2020-06-01	M00599_2.00	AVD	66	33	20.2822	1.62704	0.0014708	0.0265864
Other	2020-06-01	M00599_2.00	AVF	41	20	12.5995	1.58736	0.0140644	0.551191
Other	2020-06-01	M00599_2.00	AVH	35	18	10.7557	1.67353	0.0105957	0.495308
Other	2020-06-01	M00599_2.00	AVJ	40	19	12.2922	1.54569	0.0220695	0.496199
Coordinated Regulator	2020-06-01	M00599_2.00	BAG	87	46	26.7356	1.72055	4.96484e-05	0.0390753
Other	2020-06-01	M00599_2.00	RIG	58	28	17.8237	1.57094	0.00529593	0.259395
Coordinated Regulator	2020-06-01	M00599_2.00	VB	61	35	18.7456	1.8671	5.10061e-05	0.0441097
Coordinated Regulator	fos-1	M01144_2.00	ADF	114	47	29.5411	1.59101	0.000556373	0.00772523
Coordinated Regulator	fos-1	M01144_2.00	AFD	96	44	24.8767	1.76872	6.58042e-05	0.0130844
Other	fos-1	M01144_2.00	AIN	50	28	12.9566	2.16106	2.56603e-05	0.182738
Other	fos-1	M01144_2.00	AIZ	54	30	13.9931	2.14391	1.72364e-05	0.271192
Coordinated Regulator	fos-1	M01144_2.00	ASI	254	94	65.8195	1.42815	0.000165734	0.0340538
Other	fos-1	M01144_2.00	ASJ	147	51	38.0924	1.33885	0.0134583	0.0566943
Other	fos-1	M01144_2.00	ASK	171	66	44.3116	1.48945	0.000415028	0.0714339
Other	fos-1	M01144_2.00	RIG	58	28	15.0297	1.86298	0.000469639	0.564266
Other	crh-1	M03659_2.00	ADF	114	56	29.0588	1.92713	5.54463e-07	0.671608
Other	crh-1	M03659_2.00	AIM	62	28	15.8039	1.77171	0.00114652	0.215668
Other	crh-1	M03659_2.00	AIZ	54	26	13.7647	1.88889	0.000595417	0.825718
Other	crh-1	M03659_2.00	ASE	169	65	43.0784	1.50888	0.000328993	0.994138
Other	crh-1	M03659_2.00	ASJ	147	61	37.4706	1.62794	5.44945e-05	0.223411
Other	crh-1	M03659_2.00	BDU	68	31	17.3333	1.78846	0.000565439	0.611969
Other	crh-1	M03659_2.00	HSN	122	62	31.098	1.99369	5.35902e-08	0.589471
Other	crh-1	M03659_2.00	NSM	78	41	19.8824	2.06213	2.40314e-06	0.601716
Other	crh-1	M03659_2.00	RIG	58	21	14.7843	1.42042	0.049351	0.359621
Other	skn-1	M00596_2.00	ASI	254	109	82.581	1.31992	0.000659131	0.0951729
Other	atf-5	M00593_2.00	ADF	114	59	34.7378	1.69844	9.52964e-06	0.112011
Other	atf-5	M00593_2.00	ADL	190	80	57.8964	1.38178	0.000859462	0.267485
Coordinated Regulator	atf-5	M00593_2.00	AFD	96	41	29.2529	1.40157	0.0094211	0.00843379
Other	atf-5	M00593_2.00	ALA	55	27	16.7595	1.61103	0.00420559	0.714396
Other	atf-5	M00593_2.00	AQR	70	29	21.3302	1.35957	0.0368184	0.433262
Coordinated Regulator	atf-5	M00593_2.00	ASE	169	73	51.4973	1.41755	0.000649326	0.0298141
Other	atf-5	M00593_2.00	ASG	101	48	30.7765	1.55963	0.000519263	0.496199
Other	atf-5	M00593_2.00	ASI	254	101	77.3983	1.30494	0.00166312	0.199843
Other	atf-5	M00593_2.00	ASK	171	75	52.1067	1.43935	0.000348311	0.565452
Other	atf-5	M00593_2.00	AUA	62	33	18.8925	1.74672	0.000373735	0.185725
Other	atf-5	M00593_2.00	AWA	85	38	25.901	1.46712	0.00539674	0.0708792
Other	atf-5	M00593_2.00	AWB	119	45	36.2614	1.24099	0.0552928	0.565814
Coordinated Regulator	atf-5	M00593_2.00	AWC	161	73	49.0596	1.48799	0.000139742	0.020094
Other	atf-5	M00593_2.00	BAG	87	43	26.5105	1.622	0.000387327	0.596259
Other	atf-5	M00593_2.00	DVB	46	21	14.017	1.49818	0.0242998	0.648995
Other	atf-5	M00593_2.00	PHA	163	71	49.669	1.42946	0.000591351	0.614987
Other	atf-5	M00593_2.00	PHB	160	71	48.7549	1.45627	0.000337747	0.706234
Other	atf-5	M00593_2.00	PLN	51	27	15.5406	1.73738	0.00125569	0.954536
Other	atf-5	M00593_2.00	PQR	99	50	30.1671	1.65744	7.92167e-05	0.753412
Other	atf-5	M00593_2.00	PVP	51	25	15.5406	1.60869	0.00574238	0.384327
Other	atf-5	M00593_2.00	PVT	153	52	46.6218	1.11536	0.196784	0.735623
Other	atf-5	M00593_2.00	RIG	58	22	17.6736	1.24479	0.140891	0.84292
Other	atf-5	M00593_2.00	SIA	58	28	17.6736	1.58428	0.00473757	0.198281
Other	atf-5	M00593_2.00	SMB	40	20	12.1887	1.64086	0.00961232	0.328958
Other	atf-5	M00593_2.00	URX	88	47	26.8152	1.75274	2.56719e-05	0.932973
Coordinated Regulator	maf-1	M01814_2.00	AIB	54	29	18.0107	1.61015	0.00257724	0.00807105
Other	zip-11	M00606_2.00	VC	59	31	18.1986	1.70343	0.000845128	0.495224
Coordinated Regulator	zip-3	M00601_2.00	SIB	48	26	16.5566	1.57037	0.00554312	0.0225182
Coordinated Regulator	ceh-10--ttx-3	OH2007_CEH-10_TTX-3	AIY	108	90	55.8812	1.61056	8.71094e-10	3.99921e-13
Coordinated Regulator	cey-1	M01903_2.00	ADE	66	29	14.0875	2.05856	0.00010039	0.00079755
Coordinated Regulator	cey-1	M01903_2.00	AIM	62	30	13.2337	2.26694	1.15171e-05	0.00142212
Coordinated Regulator	cey-1	M01903_2.00	AIZ	54	26	11.5261	2.25574	4.18855e-05	0.00106157
Coordinated Regulator	cey-1	M01903_2.00	CEP	69	32	14.7278	2.17276	1.55489e-05	0.00111073
Coordinated Regulator	cey-1	M01903_2.00	DA	78	44	16.6489	2.64283	1.57492e-09	0.0005754
Coordinated Regulator	cey-1	M01903_2.00	DB	63	36	13.4471	2.67715	2.84973e-08	0.00149152
Coordinated Regulator	cey-1	M01903_2.00	HSN	122	66	26.0405	2.53451	9.57216e-13	8.4611e-07
Coordinated Regulator	cey-1	M01903_2.00	I4	42	22	8.96477	2.45405	3.69794e-05	0.0379964
Other	cey-1	M01903_2.00	I5	47	19	10.032	1.89394	0.00354005	0.0925468
Coordinated Regulator	cey-1	M01903_2.00	NSM	78	41	16.6489	2.46263	4.59819e-08	0.00144511
Coordinated Regulator	cey-1	M01903_2.00	PVW	40	18	8.53787	2.10825	0.00128522	0.0390753
Coordinated Regulator	cey-1	M01903_2.00	RIG	58	26	12.3799	2.10018	0.000153441	0.00448686
Coordinated Regulator	cey-1	M01903_2.00	VB	61	35	13.0203	2.68812	3.91877e-08	1.82522e-05
Other	ceh-38	M03716_2.00	ADA	47	32	22.9807	1.39247	0.00795318	0.0892096
Coordinated Regulator	ceh-38	M03716_2.00	ADE	66	40	32.2708	1.23951	0.0404042	0.00287451
Piecemeal Regulator	ceh-38	M03716_2.00	ADF	114	65	55.7405	1.16612	0.0532324	0.000345724
Other	ceh-38	M03716_2.00	ADL	190	106	92.9009	1.141	0.0363482	0.350189
Coordinated Regulator	ceh-38	M03716_2.00	AFD	96	63	46.9394	1.34216	0.00126978	0.00321614
Coordinated Regulator	ceh-38	M03716_2.00	AIA	53	35	25.9145	1.3506	0.0109756	0.00384005
Coordinated Regulator	ceh-38	M03716_2.00	AIB	54	36	26.4034	1.36346	0.00821296	0.00234303
Coordinated Regulator	ceh-38	M03716_2.00	AIM	62	42	30.315	1.38545	0.00318177	0.0193325
Other	ceh-38	M03716_2.00	AIN	50	35	24.4476	1.43163	0.00311398	0.0854218
Coordinated Regulator	ceh-38	M03716_2.00	AIY	108	73	52.8068	1.3824	0.000178578	0.0008357
Coordinated Regulator	ceh-38	M03716_2.00	AIZ	54	38	26.4034	1.43921	0.0019052	0.00283219
Other	ceh-38	M03716_2.00	ALA	55	35	26.8924	1.30149	0.0225915	0.0662767
Coordinated Regulator	ceh-38	M03716_2.00	ALM	125	81	61.119	1.32528	0.000525094	3.05941e-07
Coordinated Regulator	ceh-38	M03716_2.00	ALN	64	47	31.2929	1.50194	0.000158793	0.00142588
Coordinated Regulator	ceh-38	M03716_2.00	AQR	70	43	34.2266	1.25633	0.0266505	0.00381483
Coordinated Regulator	ceh-38	M03716_2.00	AS	61	41	29.8261	1.37464	0.00425866	0.0153931
Coordinated Regulator	ceh-38	M03716_2.00	ASE	169	96	82.6329	1.16177	0.0264385	0.00224019
Coordinated Regulator	ceh-38	M03716_2.00	ASG	101	64	49.3841	1.29596	0.00352402	0.0154097
Piecemeal Regulator	ceh-38	M03716_2.00	ASH	179	96	87.5224	1.09686	0.11877	0.00401598
Other	ceh-38	M03716_2.00	ASI	254	126	124.194	1.01454	0.435243	0.392608
Other	ceh-38	M03716_2.00	ASJ	147	73	71.8759	1.01564	0.459118	0.143126
Piecemeal Regulator	ceh-38	M03716_2.00	ASK	171	93	83.6108	1.1123	0.0895267	0.00132345
Coordinated Regulator	ceh-38	M03716_2.00	AUA	62	41	30.315	1.35246	0.00621616	0.029204
Coordinated Regulator	ceh-38	M03716_2.00	AVA	86	59	42.0499	1.4031	0.000398372	0.000237618
Coordinated Regulator	ceh-38	M03716_2.00	AVB	57	40	27.8703	1.43522	0.00160484	0.0329028
Coordinated Regulator	ceh-38	M03716_2.00	AVD	66	44	32.2708	1.36346	0.00391673	0.0116385
Coordinated Regulator	ceh-38	M03716_2.00	AVE	64	41	31.2929	1.3102	0.0126023	0.00332131
Coordinated Regulator	ceh-38	M03716_2.00	AVF	41	26	20.047	1.29695	0.0471116	0.00196143
Coordinated Regulator	ceh-38	M03716_2.00	AVG	60	38	29.3371	1.29529	0.0199046	0.00230122
Coordinated Regulator	ceh-38	M03716_2.00	AVH	35	23	17.1133	1.34398	0.0368993	0.0203315
Coordinated Regulator	ceh-38	M03716_2.00	AVJ	40	26	19.5581	1.32937	0.0326091	0.00711312
Coordinated Regulator	ceh-38	M03716_2.00	AVK	47	33	22.9807	1.43599	0.00371929	0.0401863
Coordinated Regulator	ceh-38	M03716_2.00	AVL	41	27	20.047	1.34683	0.0242998	0.0295596
Coordinated Regulator	ceh-38	M03716_2.00	AVM	93	59	45.4725	1.29749	0.00470388	7.04475e-06
Coordinated Regulator	ceh-38	M03716_2.00	AWA	85	54	41.5609	1.2993	0.00621754	0.00410207
Piecemeal Regulator	ceh-38	M03716_2.00	AWB	119	65	58.1853	1.11712	0.126071	0.0175537
Coordinated Regulator	ceh-38	M03716_2.00	AWC	161	104	78.7213	1.32112	0.000121548	0.000487479
Coordinated Regulator	ceh-38	M03716_2.00	BAG	87	58	42.5388	1.36346	0.00114458	0.00316102
Coordinated Regulator	ceh-38	M03716_2.00	BDU	68	51	33.2487	1.53389	3.83993e-05	0.00830245
Coordinated Regulator	ceh-38	M03716_2.00	CAN	89	69	43.5167	1.5856	3.72676e-07	8.95182e-06
Piecemeal Regulator	ceh-38	M03716_2.00	CEP	69	41	33.7377	1.21526	0.0546179	0.0108734
Coordinated Regulator	ceh-38	M03716_2.00	DA	78	53	38.1383	1.38968	0.000991438	0.00146333
Coordinated Regulator	ceh-38	M03716_2.00	DB	63	43	30.804	1.39592	0.00236392	0.00196143
Coordinated Regulator	ceh-38	M03716_2.00	DD	55	38	26.8924	1.41304	0.00300322	0.000647848
Coordinated Regulator	ceh-38	M03716_2.00	DVA	75	55	36.6714	1.49981	5.01007e-05	0.0406549
Coordinated Regulator	ceh-38	M03716_2.00	DVB	46	33	22.4918	1.4672	0.00227764	0.00556636
Coordinated Regulator	ceh-38	M03716_2.00	DVC	49	32	23.9586	1.33563	0.017782	0.00404069
Other	ceh-38	M03716_2.00	FLP	72	48	35.2045	1.36346	0.00274485	0.0921291
Coordinated Regulator	ceh-38	M03716_2.00	HSN	122	88	59.6521	1.47522	1.35441e-06	1.45747e-06
Coordinated Regulator	ceh-38	M03716_2.00	I1	48	34	23.4697	1.44868	0.00268298	0.00417798
Coordinated Regulator	ceh-38	M03716_2.00	I2	55	37	26.8924	1.37586	0.00613028	0.0264543
Piecemeal Regulator	ceh-38	M03716_2.00	I3	46	26	22.4918	1.15598	0.190059	0.0417777
Coordinated Regulator	ceh-38	M03716_2.00	I4	42	27	20.536	1.31477	0.0355176	0.016476
Other	ceh-38	M03716_2.00	I5	47	30	22.9807	1.30544	0.0311014	0.0786549
Other	ceh-38	M03716_2.00	I6	40	23	19.5581	1.17598	0.179181	0.272557
Coordinated Regulator	ceh-38	M03716_2.00	IL1	55	35	26.8924	1.30149	0.0225915	0.0171819
Coordinated Regulator	ceh-38	M03716_2.00	IL2	62	40	30.315	1.31948	0.011737	0.0273019
Coordinated Regulator	ceh-38	M03716_2.00	LUA	50	35	24.4476	1.43163	0.00311398	0.0279499
Coordinated Regulator	ceh-38	M03716_2.00	M1	48	31	23.4697	1.32085	0.0237032	0.0289058
Coordinated Regulator	ceh-38	M03716_2.00	M2	43	28	21.0249	1.33175	0.0266675	0.00345256
Other	ceh-38	M03716_2.00	M3	44	26	21.5139	1.20852	0.117752	0.0520625
Coordinated Regulator	ceh-38	M03716_2.00	M4	52	36	25.4255	1.4159	0.00357317	0.020094
Coordinated Regulator	ceh-38	M03716_2.00	M5	50	32	24.4476	1.30892	0.0255776	0.00173592
Other	ceh-38	M03716_2.00	MC	37	24	18.0912	1.32661	0.040376	0.0728126
Other	ceh-38	M03716_2.00	MI	40	25	19.5581	1.27824	0.0619004	0.118309
Coordinated Regulator	ceh-38	M03716_2.00	NSM	78	52	38.1383	1.36346	0.00192014	0.000164721
Coordinated Regulator	ceh-38	M03716_2.00	OLL	78	49	38.1383	1.2848	0.0113907	0.00410627
Coordinated Regulator	ceh-38	M03716_2.00	OLQ	75	45	36.6714	1.22711	0.0381125	0.0245042
Coordinated Regulator	ceh-38	M03716_2.00	PDA	51	35	24.9365	1.40356	0.00490194	0.0373795
Coordinated Regulator	ceh-38	M03716_2.00	PDB	38	27	18.5802	1.45316	0.00633889	0.0299918
Coordinated Regulator	ceh-38	M03716_2.00	PDE	73	47	35.6935	1.31677	0.00722744	0.00165537
Other	ceh-38	M03716_2.00	PHA	163	89	79.6992	1.1167	0.0865646	0.050103
Coordinated Regulator	ceh-38	M03716_2.00	PHB	160	90	78.2323	1.15042	0.0401055	0.0366486
Other	ceh-38	M03716_2.00	PHC	52	33	25.4255	1.29791	0.0274411	0.123696
Coordinated Regulator	ceh-38	M03716_2.00	PLM	133	85	65.0306	1.30708	0.000701567	6.2687e-09
Coordinated Regulator	ceh-38	M03716_2.00	PLN	51	38	24.9365	1.52387	0.000405742	0.0360779
Coordinated Regulator	ceh-38	M03716_2.00	PQR	99	64	48.4062	1.32214	0.00190204	0.000764604
Coordinated Regulator	ceh-38	M03716_2.00	PVC	80	50	39.1162	1.27824	0.0120793	0.00401598
Coordinated Regulator	ceh-38	M03716_2.00	PVD	97	65	47.4283	1.37049	0.00051949	0.000118962
Coordinated Regulator	ceh-38	M03716_2.00	PVM	84	54	41.072	1.31477	0.00458081	3.94345e-05
Other	ceh-38	M03716_2.00	PVN	43	30	21.0249	1.42688	0.00614133	0.0833355
Coordinated Regulator	ceh-38	M03716_2.00	PVP	51	36	24.9365	1.44366	0.00225429	0.0246863
Coordinated Regulator	ceh-38	M03716_2.00	PVQ	83	51	40.583	1.25668	0.0169573	0.00608783
Other	ceh-38	M03716_2.00	PVR	54	36	26.4034	1.36346	0.00821296	0.292411
Other	ceh-38	M03716_2.00	PVT	153	76	74.8096	1.01591	0.455901	0.126811
Other	ceh-38	M03716_2.00	PVW	40	26	19.5581	1.32937	0.0326091	0.131544
Piecemeal Regulator	ceh-38	M03716_2.00	RIA	56	32	27.3813	1.16868	0.13832	0.00410207
Coordinated Regulator	ceh-38	M03716_2.00	RIB	55	38	26.8924	1.41304	0.00300322	0.00149502
Coordinated Regulator	ceh-38	M03716_2.00	RIC	55	36	26.8924	1.33867	0.0120319	0.0171819
Piecemeal Regulator	ceh-38	M03716_2.00	RID	53	32	25.9145	1.23483	0.06522	0.0111481
Coordinated Regulator	ceh-38	M03716_2.00	RIF	53	38	25.9145	1.46636	0.00118434	0.00151717
Other	ceh-38	M03716_2.00	RIG	58	35	28.3592	1.23417	0.0562644	0.0504364
Other	ceh-38	M03716_2.00	RIH	49	34	23.9586	1.41911	0.00428281	0.640444
Coordinated Regulator	ceh-38	M03716_2.00	RIM	64	42	31.2929	1.34216	0.00679756	0.0111305
Other	ceh-38	M03716_2.00	RIP	36	26	17.6023	1.47708	0.00536797	0.135975
Other	ceh-38	M03716_2.00	RIR	34	25	16.6244	1.50382	0.00444962	0.112219
Piecemeal Regulator	ceh-38	M03716_2.00	RIS	49	30	23.9586	1.25216	0.0595967	0.0097191
Coordinated Regulator	ceh-38	M03716_2.00	RIV	54	34	26.4034	1.28771	0.0293087	0.0384276
Coordinated Regulator	ceh-38	M03716_2.00	RMD	71	50	34.7156	1.44028	0.000441074	0.000304038
Coordinated Regulator	ceh-38	M03716_2.00	RME	61	41	29.8261	1.37464	0.00425866	0.000345724
Other	ceh-38	M03716_2.00	RMF	37	26	18.0912	1.43716	0.00892103	0.0723535
Coordinated Regulator	ceh-38	M03716_2.00	RMG	44	33	21.5139	1.53389	0.000769413	0.0256448
Other	ceh-38	M03716_2.00	RMH	36	25	17.6023	1.42027	0.0124752	0.0684696
Coordinated Regulator	ceh-38	M03716_2.00	SAA	47	31	22.9807	1.34896	0.0161898	0.00689106
Coordinated Regulator	ceh-38	M03716_2.00	SAB	55	38	26.8924	1.41304	0.00300322	0.0219264
Coordinated Regulator	ceh-38	M03716_2.00	SDQ	63	41	30.804	1.331	0.00895505	0.000621659
Coordinated Regulator	ceh-38	M03716_2.00	SIA	58	40	28.3592	1.41048	0.00249702	0.00139754
Coordinated Regulator	ceh-38	M03716_2.00	SIB	48	33	23.4697	1.40607	0.00584806	0.0113223
Coordinated Regulator	ceh-38	M03716_2.00	SMB	40	27	19.5581	1.3805	0.0160484	0.00596387
Coordinated Regulator	ceh-38	M03716_2.00	SMD	68	48	33.2487	1.44366	0.000519263	1.6015e-05
Coordinated Regulator	ceh-38	M03716_2.00	URA	46	32	22.4918	1.42274	0.00515303	0.031551
Other	ceh-38	M03716_2.00	URB	44	30	21.5139	1.39445	0.00969949	0.190942
Coordinated Regulator	ceh-38	M03716_2.00	URX	88	52	43.0278	1.20852	0.0382258	0.0130147
Coordinated Regulator	ceh-38	M03716_2.00	URY	47	32	22.9807	1.39247	0.00795318	0.000958815
Coordinated Regulator	ceh-38	M03716_2.00	VA	67	49	32.7598	1.49574	0.000136384	0.0130844
Coordinated Regulator	ceh-38	M03716_2.00	VB	61	44	29.8261	1.47522	0.000442381	0.00149386
Coordinated Regulator	ceh-38	M03716_2.00	VC	59	40	28.8482	1.38657	0.00381009	0.00291301
Coordinated Regulator	ceh-38	M03716_2.00	VD	49	37	23.9586	1.54433	0.0003239	0.00034742
Other	ceh-48	M01905_2.00	ADA	47	32	22.8193	1.40232	0.00709363	0.0805088
Coordinated Regulator	ceh-48	M01905_2.00	ADE	66	45	32.0442	1.40431	0.00170019	0.0223052
Coordinated Regulator	ceh-48	M01905_2.00	ADF	114	71	55.3491	1.28277	0.00328681	0.0176267
Other	ceh-48	M01905_2.00	ADL	190	106	92.2484	1.14907	0.0297231	0.749422
Coordinated Regulator	ceh-48	M01905_2.00	AFD	96	65	46.6097	1.39456	0.000289838	0.0086236
Coordinated Regulator	ceh-48	M01905_2.00	AIA	53	34	25.7325	1.32129	0.0186571	0.00784773
Coordinated Regulator	ceh-48	M01905_2.00	AIB	54	39	26.218	1.48753	0.000725191	0.0132628
Coordinated Regulator	ceh-48	M01905_2.00	AIM	62	40	30.1021	1.32881	0.0103274	0.0436346
Other	ceh-48	M01905_2.00	AIN	50	34	24.2759	1.40057	0.00584806	0.0504364
Coordinated Regulator	ceh-48	M01905_2.00	AIY	108	71	52.436	1.35403	0.000511269	0.0245042
Coordinated Regulator	ceh-48	M01905_2.00	AIZ	54	35	26.218	1.33496	0.0141266	0.012508
Other	ceh-48	M01905_2.00	ALA	55	36	26.7035	1.34814	0.0106906	0.147688
Coordinated Regulator	ceh-48	M01905_2.00	ALM	125	81	60.6898	1.33466	0.000415396	4.2432e-05
Coordinated Regulator	ceh-48	M01905_2.00	ALN	64	44	31.0732	1.41601	0.00151465	0.0155847
Coordinated Regulator	ceh-48	M01905_2.00	AQR	70	47	33.9863	1.38291	0.00211658	0.0200565
Other	ceh-48	M01905_2.00	AS	61	44	29.6166	1.48565	0.000373844	0.0739471
Coordinated Regulator	ceh-48	M01905_2.00	ASE	169	100	82.0526	1.21873	0.00494757	0.0454681
Coordinated Regulator	ceh-48	M01905_2.00	ASG	101	62	49.0373	1.26434	0.00823105	0.0218554
Other	ceh-48	M01905_2.00	ASH	179	102	86.9077	1.17366	0.0167388	0.266405
Other	ceh-48	M01905_2.00	ASI	254	120	123.322	0.973066	0.68519	0.915955
Other	ceh-48	M01905_2.00	ASJ	147	80	71.3712	1.1209	0.0924342	0.166133
Other	ceh-48	M01905_2.00	ASK	171	98	83.0236	1.18039	0.0155427	0.0818846
Other	ceh-48	M01905_2.00	AUA	62	40	30.1021	1.32881	0.0103274	0.112067
Coordinated Regulator	ceh-48	M01905_2.00	AVA	86	63	41.7546	1.50882	1.38549e-05	0.00490402
Other	ceh-48	M01905_2.00	AVB	57	40	27.6745	1.44537	0.00139374	0.0590304
Coordinated Regulator	ceh-48	M01905_2.00	AVD	66	48	32.0442	1.49793	0.000159431	0.00421511
Coordinated Regulator	ceh-48	M01905_2.00	AVE	64	45	31.0732	1.4482	0.000712299	0.0498002
Other	ceh-48	M01905_2.00	AVF	41	27	19.9062	1.35636	0.0221548	0.13482
Coordinated Regulator	ceh-48	M01905_2.00	AVG	60	39	29.1311	1.33878	0.00956963	0.00471435
Other	ceh-48	M01905_2.00	AVH	35	24	16.9931	1.41234	0.0158634	0.252615
Other	ceh-48	M01905_2.00	AVJ	40	26	19.4207	1.33878	0.0297719	0.0526334
Other	ceh-48	M01905_2.00	AVK	47	33	22.8193	1.44614	0.0032877	0.0586385
Other	ceh-48	M01905_2.00	AVL	41	25	19.9062	1.25589	0.0785948	0.175623
Coordinated Regulator	ceh-48	M01905_2.00	AVM	93	60	45.1532	1.32881	0.00223445	0.000236918
Coordinated Regulator	ceh-48	M01905_2.00	AWA	85	54	41.269	1.30849	0.00531902	0.0132771
Other	ceh-48	M01905_2.00	AWB	119	71	57.7766	1.22887	0.0118226	0.13622
Coordinated Regulator	ceh-48	M01905_2.00	AWC	161	105	78.1684	1.34325	4.98525e-05	0.00472699
Coordinated Regulator	ceh-48	M01905_2.00	BAG	87	61	42.2401	1.44413	0.000111546	0.0109471
Coordinated Regulator	ceh-48	M01905_2.00	BDU	68	48	33.0152	1.45387	0.000437538	0.0422903
Coordinated Regulator	ceh-48	M01905_2.00	CAN	89	64	43.2111	1.4811	2.6481e-05	0.00139837
Other	ceh-48	M01905_2.00	CEP	69	46	33.5007	1.3731	0.0028229	0.14753
Coordinated Regulator	ceh-48	M01905_2.00	DA	78	55	37.8704	1.45232	0.000188464	0.0366638
Coordinated Regulator	ceh-48	M01905_2.00	DB	63	44	30.5876	1.43849	0.000976045	0.0205865
Coordinated Regulator	ceh-48	M01905_2.00	DD	55	38	26.7035	1.42303	0.00260421	0.0112329
Coordinated Regulator	ceh-48	M01905_2.00	DVA	75	57	36.4139	1.56534	6.72451e-06	0.0162356
Coordinated Regulator	ceh-48	M01905_2.00	DVB	46	31	22.3338	1.38803	0.00973676	0.00677271
Coordinated Regulator	ceh-48	M01905_2.00	DVC	49	31	23.7904	1.30305	0.0301985	0.0038436
Other	ceh-48	M01905_2.00	FLP	72	48	34.9573	1.3731	0.00233036	0.432536
Coordinated Regulator	ceh-48	M01905_2.00	HSN	122	87	59.2332	1.46877	2.27552e-06	4.2811e-05
Coordinated Regulator	ceh-48	M01905_2.00	I1	48	30	23.3049	1.28728	0.0397023	0.0366471
Other	ceh-48	M01905_2.00	I2	55	36	26.7035	1.34814	0.0106906	0.0637017
Other	ceh-48	M01905_2.00	I3	46	26	22.3338	1.16415	0.178297	0.197058
Other	ceh-48	M01905_2.00	I4	42	27	20.3918	1.32406	0.0322992	0.0710553
Other	ceh-48	M01905_2.00	I5	47	31	22.8193	1.3585	0.0145297	0.335133
Other	ceh-48	M01905_2.00	I6	40	22	19.4207	1.13281	0.257018	0.830603
Other	ceh-48	M01905_2.00	IL1	55	37	26.7035	1.38559	0.00539782	0.0821922
Other	ceh-48	M01905_2.00	IL2	62	40	30.1021	1.32881	0.0103274	0.127472
Other	ceh-48	M01905_2.00	LUA	50	37	24.2759	1.52415	0.000496959	0.180451
Other	ceh-48	M01905_2.00	M1	48	32	23.3049	1.3731	0.0107924	0.068672
Other	ceh-48	M01905_2.00	M2	43	28	20.8773	1.34117	0.0241699	0.0837699
Other	ceh-48	M01905_2.00	M3	44	27	21.3628	1.26388	0.06352	0.34354
Other	ceh-48	M01905_2.00	M4	52	37	25.2469	1.46552	0.00143067	0.212073
Coordinated Regulator	ceh-48	M01905_2.00	M5	50	33	24.2759	1.35937	0.0118887	0.0310714
Other	ceh-48	M01905_2.00	MC	37	25	17.9642	1.39166	0.0179214	0.380749
Other	ceh-48	M01905_2.00	MI	40	24	19.4207	1.23579	0.10149	0.279284
Coordinated Regulator	ceh-48	M01905_2.00	NSM	78	50	37.8704	1.32029	0.00558744	0.00118142
Coordinated Regulator	ceh-48	M01905_2.00	OLL	78	48	37.8704	1.26748	0.0168298	0.0444953
Other	ceh-48	M01905_2.00	OLQ	75	48	36.4139	1.31818	0.00670724	0.446444
Other	ceh-48	M01905_2.00	PDA	51	35	24.7614	1.41349	0.00429482	0.147603
Other	ceh-48	M01905_2.00	PDB	38	26	18.4497	1.40924	0.0128793	0.09315
Coordinated Regulator	ceh-48	M01905_2.00	PDE	73	46	35.4428	1.29787	0.0112024	0.0100386
Other	ceh-48	M01905_2.00	PHA	163	93	79.1394	1.17514	0.0205945	0.485313
Other	ceh-48	M01905_2.00	PHB	160	90	77.6829	1.15856	0.0333858	0.147386
Other	ceh-48	M01905_2.00	PHC	52	33	25.2469	1.30709	0.0246317	0.218948
Coordinated Regulator	ceh-48	M01905_2.00	PLM	133	86	64.5739	1.33181	0.000317848	2.5004e-05
Other	ceh-48	M01905_2.00	PLN	51	34	24.7614	1.3731	0.00883768	0.225591
Coordinated Regulator	ceh-48	M01905_2.00	PQR	99	68	48.0663	1.41471	0.000117507	0.0120296
Coordinated Regulator	ceh-48	M01905_2.00	PVC	80	55	38.8414	1.41601	0.000461132	0.0165045
Coordinated Regulator	ceh-48	M01905_2.00	PVD	97	59	47.0953	1.25278	0.0122663	0.0301641
Coordinated Regulator	ceh-48	M01905_2.00	PVM	84	55	40.7835	1.34858	0.00212365	0.0106706
Other	ceh-48	M01905_2.00	PVN	43	30	20.8773	1.43697	0.00550013	0.0520625
Coordinated Regulator	ceh-48	M01905_2.00	PVP	51	35	24.7614	1.41349	0.00429482	0.0243259
Coordinated Regulator	ceh-48	M01905_2.00	PVQ	83	50	40.298	1.24076	0.0242824	0.00893004
Other	ceh-48	M01905_2.00	PVR	54	36	26.218	1.3731	0.00723695	0.526462
Other	ceh-48	M01905_2.00	PVT	153	76	74.2843	1.0231	0.422853	0.335869
Other	ceh-48	M01905_2.00	PVW	40	24	19.4207	1.23579	0.10149	0.527112
Piecemeal Regulator	ceh-48	M01905_2.00	RIA	56	33	27.189	1.21373	0.0807915	0.00824192
Coordinated Regulator	ceh-48	M01905_2.00	RIB	55	38	26.7035	1.42303	0.00260421	0.0140448
Other	ceh-48	M01905_2.00	RIC	55	36	26.7035	1.34814	0.0106906	0.0803602
Other	ceh-48	M01905_2.00	RID	53	34	25.7325	1.32129	0.0186571	0.171212
Coordinated Regulator	ceh-48	M01905_2.00	RIF	53	38	25.7325	1.47673	0.00102043	0.0232585
Other	ceh-48	M01905_2.00	RIG	58	37	28.16	1.31392	0.0164163	0.121736
Other	ceh-48	M01905_2.00	RIH	49	32	23.7904	1.34508	0.0159021	0.219287
Other	ceh-48	M01905_2.00	RIM	64	45	31.0732	1.4482	0.000712299	0.112679
Other	ceh-48	M01905_2.00	RIP	36	23	17.4787	1.31589	0.0498976	0.0690768
Other	ceh-48	M01905_2.00	RIR	34	23	16.5076	1.3933	0.022247	0.111155
Other	ceh-48	M01905_2.00	RIS	49	30	23.7904	1.26101	0.0542972	0.104009
Other	ceh-48	M01905_2.00	RIV	54	36	26.218	1.3731	0.00723695	0.0971863
Coordinated Regulator	ceh-48	M01905_2.00	RMD	71	53	34.4718	1.53749	2.72868e-05	0.0130844
Coordinated Regulator	ceh-48	M01905_2.00	RME	61	43	29.6166	1.45189	0.000849245	0.0073586
Other	ceh-48	M01905_2.00	RMF	37	25	17.9642	1.39166	0.0179214	0.244317
Other	ceh-48	M01905_2.00	RMG	44	32	21.3628	1.49793	0.00168324	0.157708
Other	ceh-48	M01905_2.00	RMH	36	24	17.4787	1.3731	0.0247203	0.324806
Other	ceh-48	M01905_2.00	SAA	47	33	22.8193	1.44614	0.0032877	0.283784
Other	ceh-48	M01905_2.00	SAB	55	39	26.7035	1.46048	0.0012053	0.391293
Coordinated Regulator	ceh-48	M01905_2.00	SDQ	63	42	30.5876	1.3731	0.00408694	0.0194187
Coordinated Regulator	ceh-48	M01905_2.00	SIA	58	41	28.16	1.45596	0.00100812	0.0257978
Other	ceh-48	M01905_2.00	SIB	48	33	23.3049	1.41601	0.00521474	0.256371
Other	ceh-48	M01905_2.00	SMB	40	28	19.4207	1.44176	0.0066469	0.235588
Coordinated Regulator	ceh-48	M01905_2.00	SMD	68	50	33.0152	1.51445	7.96091e-05	0.00200365
Other	ceh-48	M01905_2.00	URA	46	31	22.3338	1.38803	0.00973676	0.177551
Other	ceh-48	M01905_2.00	URB	44	27	21.3628	1.26388	0.06352	0.649036
Other	ceh-48	M01905_2.00	URX	88	53	42.7256	1.24047	0.0211149	0.118143
Coordinated Regulator	ceh-48	M01905_2.00	URY	47	32	22.8193	1.40232	0.00709363	0.00582132
Coordinated Regulator	ceh-48	M01905_2.00	VA	67	48	32.5297	1.47557	0.000271227	0.0153931
Coordinated Regulator	ceh-48	M01905_2.00	VB	61	43	29.6166	1.45189	0.000849245	0.00398131
Coordinated Regulator	ceh-48	M01905_2.00	VC	59	41	28.6456	1.43129	0.0015944	0.0150783
Coordinated Regulator	ceh-48	M01905_2.00	VD	49	35	23.7904	1.47118	0.00168707	0.00166545
Other	ceh-74	M01248_2.00	ADA	47	17	10.6846	1.59108	0.0285582	0.0737554
Coordinated Regulator	ceh-74	M01248_2.00	ADE	66	28	15.0039	1.86618	0.000618876	0.0441097
Coordinated Regulator	ceh-74	M01248_2.00	ADF	114	46	25.9158	1.77498	6.3704e-05	0.0141033
Other	ceh-74	M01248_2.00	ADL	190	59	43.193	1.36596	0.00660751	0.678868
Coordinated Regulator	ceh-74	M01248_2.00	AFD	96	39	21.8238	1.78704	0.000182305	0.00301713
Coordinated Regulator	ceh-74	M01248_2.00	AIA	53	26	12.0486	2.15793	7.92167e-05	0.0320018
Coordinated Regulator	ceh-74	M01248_2.00	AIB	54	25	12.2759	2.03651	0.000290029	2.74241e-05
Coordinated Regulator	ceh-74	M01248_2.00	AIM	62	22	14.0946	1.56089	0.0179902	0.0133274
Coordinated Regulator	ceh-74	M01248_2.00	AIN	50	27	11.3666	2.37539	9.06404e-06	0.0344997
Coordinated Regulator	ceh-74	M01248_2.00	AIY	108	49	24.5518	1.99578	1.50382e-06	0.00549013
Coordinated Regulator	ceh-74	M01248_2.00	AIZ	54	25	12.2759	2.03651	0.000290029	0.000517482
Other	ceh-74	M01248_2.00	ALA	55	24	12.5032	1.9195	0.000923914	0.0644865
Coordinated Regulator	ceh-74	M01248_2.00	ALM	125	58	28.4164	2.04107	1.06934e-07	2.18515e-05
Coordinated Regulator	ceh-74	M01248_2.00	ALN	64	34	14.5492	2.3369	1.16759e-06	0.000767255
Coordinated Regulator	ceh-74	M01248_2.00	AQR	70	26	15.9132	1.63386	0.00613595	0.0174114
Coordinated Regulator	ceh-74	M01248_2.00	AS	61	28	13.8672	2.01915	0.000155968	0.00431101
Other	ceh-74	M01248_2.00	ASE	169	68	38.419	1.76996	2.12984e-06	0.157373
Other	ceh-74	M01248_2.00	ASG	101	40	22.9605	1.74212	0.000270897	0.0892759
Other	ceh-74	M01248_2.00	ASH	179	62	40.6923	1.52363	0.000429535	0.538603
Other	ceh-74	M01248_2.00	ASI	254	69	57.7422	1.19497	0.0580751	0.199806
Coordinated Regulator	ceh-74	M01248_2.00	ASJ	147	46	33.4177	1.37651	0.0125508	0.0106836
Other	ceh-74	M01248_2.00	ASK	171	55	38.8737	1.41484	0.00415156	0.199275
Other	ceh-74	M01248_2.00	AUA	62	29	14.0946	2.05753	8.50249e-05	0.0618667
Coordinated Regulator	ceh-74	M01248_2.00	AVA	86	45	19.5505	2.30173	6.48042e-08	0.000169215
Other	ceh-74	M01248_2.00	AVB	57	29	12.9579	2.23802	1.58789e-05	0.148803
Coordinated Regulator	ceh-74	M01248_2.00	AVD	66	32	15.0039	2.13278	1.83711e-05	0.000927421
Coordinated Regulator	ceh-74	M01248_2.00	AVE	64	34	14.5492	2.3369	1.16759e-06	0.00297582
Other	ceh-74	M01248_2.00	AVF	41	16	9.32059	1.71663	0.0165349	0.188743
Coordinated Regulator	ceh-74	M01248_2.00	AVG	60	27	13.6399	1.97949	0.000288663	0.000866498
Other	ceh-74	M01248_2.00	AVH	35	18	7.9566	2.26227	0.000455193	0.167647
Other	ceh-74	M01248_2.00	AVJ	40	17	9.09326	1.86952	0.00580423	0.113754
Other	ceh-74	M01248_2.00	AVK	47	18	10.6846	1.68467	0.0141314	0.151123
Other	ceh-74	M01248_2.00	AVL	41	14	9.32059	1.50205	0.0673379	0.237521
Coordinated Regulator	ceh-74	M01248_2.00	AVM	93	46	21.1418	2.17578	2.4862e-07	1.97697e-05
Coordinated Regulator	ceh-74	M01248_2.00	AWA	85	30	19.3232	1.55254	0.00750043	0.00764432
Other	ceh-74	M01248_2.00	AWB	119	40	27.0525	1.47861	0.00588837	0.1371
Coordinated Regulator	ceh-74	M01248_2.00	AWC	161	56	36.6004	1.53004	0.000686314	0.038504
Coordinated Regulator	ceh-74	M01248_2.00	BAG	87	39	19.7778	1.9719	1.92283e-05	0.0141928
Coordinated Regulator	ceh-74	M01248_2.00	BDU	68	29	15.4585	1.87599	0.000462452	0.0220339
Coordinated Regulator	ceh-74	M01248_2.00	CAN	89	46	20.2325	2.27357	7.03676e-08	7.41976e-05
Other	ceh-74	M01248_2.00	CEP	69	28	15.6859	1.78505	0.00127099	0.0812165
Coordinated Regulator	ceh-74	M01248_2.00	DA	78	37	17.7319	2.08664	8.25732e-06	0.00034742
Coordinated Regulator	ceh-74	M01248_2.00	DB	63	30	14.3219	2.0947	4.54104e-05	0.00451408
Coordinated Regulator	ceh-74	M01248_2.00	DD	55	23	12.5032	1.83952	0.00204726	0.000381802
Coordinated Regulator	ceh-74	M01248_2.00	DVA	75	40	17.0499	2.34606	1.64656e-07	0.00793266
Coordinated Regulator	ceh-74	M01248_2.00	DVB	46	19	10.4573	1.81692	0.00527007	0.00577959
Coordinated Regulator	ceh-74	M01248_2.00	DVC	49	20	11.1392	1.79545	0.00499657	0.0288427
Coordinated Regulator	ceh-74	M01248_2.00	FLP	72	26	16.3679	1.58848	0.00888341	0.038301
Coordinated Regulator	ceh-74	M01248_2.00	HSN	122	62	27.7344	2.23549	1.36731e-09	2.36812e-05
Coordinated Regulator	ceh-74	M01248_2.00	I1	48	19	10.9119	1.74122	0.00842926	0.00406843
Coordinated Regulator	ceh-74	M01248_2.00	I2	55	23	12.5032	1.83952	0.00204726	0.0108548
Other	ceh-74	M01248_2.00	I3	46	16	10.4573	1.53004	0.0458717	0.458339
Other	ceh-74	M01248_2.00	I4	42	16	9.54792	1.67576	0.0207887	0.197619
Other	ceh-74	M01248_2.00	I5	47	18	10.6846	1.68467	0.0141314	0.207505
Other	ceh-74	M01248_2.00	I6	40	13	9.09326	1.42963	0.105298	0.855712
Coordinated Regulator	ceh-74	M01248_2.00	IL1	55	20	12.5032	1.59959	0.0179341	0.0290771
Other	ceh-74	M01248_2.00	IL2	62	21	14.0946	1.48994	0.0329428	0.0528392
Coordinated Regulator	ceh-74	M01248_2.00	LUA	50	23	11.3666	2.02348	0.000525858	0.000345724
Coordinated Regulator	ceh-74	M01248_2.00	M1	48	19	10.9119	1.74122	0.00842926	0.0449358
Coordinated Regulator	ceh-74	M01248_2.00	M2	43	20	9.77526	2.04598	0.000971994	0.0133099
Other	ceh-74	M01248_2.00	M3	44	15	10.0026	1.49961	0.0607221	0.551191
Other	ceh-74	M01248_2.00	M4	52	23	11.8212	1.94565	0.000945801	0.162889
Coordinated Regulator	ceh-74	M01248_2.00	M5	50	22	11.3666	1.9355	0.00127827	0.00371181
Other	ceh-74	M01248_2.00	MC	37	14	8.41127	1.66443	0.0305795	0.133647
Other	ceh-74	M01248_2.00	MI	40	12	9.09326	1.31966	0.182908	0.179615
Coordinated Regulator	ceh-74	M01248_2.00	NSM	78	36	17.7319	2.03024	1.93539e-05	0.000331619
Coordinated Regulator	ceh-74	M01248_2.00	OLL	78	29	17.7319	1.63547	0.00403624	0.00793266
Coordinated Regulator	ceh-74	M01248_2.00	OLQ	75	30	17.0499	1.75954	0.00112936	0.0292144
Coordinated Regulator	ceh-74	M01248_2.00	PDA	51	27	11.5939	2.32881	1.3612e-05	0.0203041
Coordinated Regulator	ceh-74	M01248_2.00	PDB	38	18	8.6386	2.08367	0.00131888	0.0133851
Coordinated Regulator	ceh-74	M01248_2.00	PDE	73	28	16.5952	1.68723	0.00296558	0.014968
Other	ceh-74	M01248_2.00	PHA	163	47	37.055	1.26838	0.044216	0.289096
Coordinated Regulator	ceh-74	M01248_2.00	PHB	160	49	36.373	1.34715	0.0152103	0.020094
Coordinated Regulator	ceh-74	M01248_2.00	PHC	52	20	11.8212	1.69187	0.00982144	0.0255289
Coordinated Regulator	ceh-74	M01248_2.00	PLM	133	60	30.2351	1.98445	1.76744e-07	1.2917e-05
Coordinated Regulator	ceh-74	M01248_2.00	PLN	51	22	11.5939	1.89755	0.00165485	0.0075769
Coordinated Regulator	ceh-74	M01248_2.00	PQR	99	37	22.5058	1.64402	0.00129549	0.00533643
Coordinated Regulator	ceh-74	M01248_2.00	PVC	80	41	18.1865	2.25442	3.45341e-07	0.000160624
Coordinated Regulator	ceh-74	M01248_2.00	PVD	97	40	22.0512	1.81396	0.000108389	3.94491e-05
Coordinated Regulator	ceh-74	M01248_2.00	PVM	84	40	19.0958	2.0947	3.47197e-06	0.000160026
Coordinated Regulator	ceh-74	M01248_2.00	PVN	43	21	9.77526	2.14828	0.00037298	0.0144602
Coordinated Regulator	ceh-74	M01248_2.00	PVP	51	25	11.5939	2.1563	0.000106504	0.000316577
Coordinated Regulator	ceh-74	M01248_2.00	PVQ	83	39	18.8685	2.06693	6.27382e-06	0.0272762
Other	ceh-74	M01248_2.00	PVR	54	24	12.2759	1.95505	0.00070099	0.618046
Other	ceh-74	M01248_2.00	PVT	153	42	34.7817	1.20753	0.101792	0.557143
Other	ceh-74	M01248_2.00	PVW	40	15	9.09326	1.64957	0.0280309	0.788184
Coordinated Regulator	ceh-74	M01248_2.00	RIA	56	21	12.7306	1.64957	0.0111394	0.012237
Coordinated Regulator	ceh-74	M01248_2.00	RIB	55	23	12.5032	1.83952	0.00204726	0.014285
Other	ceh-74	M01248_2.00	RIC	55	25	12.5032	1.99948	0.000388881	0.0636629
Other	ceh-74	M01248_2.00	RID	53	19	12.0486	1.57695	0.0238115	0.267989
Coordinated Regulator	ceh-74	M01248_2.00	RIF	53	24	12.0486	1.99194	0.000523772	0.000605396
Coordinated Regulator	ceh-74	M01248_2.00	RIG	58	24	13.1852	1.82022	0.00194984	0.00191597
Other	ceh-74	M01248_2.00	RIH	49	20	11.1392	1.79545	0.00499657	0.319159
Coordinated Regulator	ceh-74	M01248_2.00	RIM	64	21	14.5492	1.44338	0.0451224	0.00469061
Other	ceh-74	M01248_2.00	RIP	36	10	8.18394	1.22191	0.293386	0.298835
Coordinated Regulator	ceh-74	M01248_2.00	RIR	34	14	7.72927	1.8113	0.0149466	0.0239213
Other	ceh-74	M01248_2.00	RIS	49	20	11.1392	1.79545	0.00499657	0.413072
Coordinated Regulator	ceh-74	M01248_2.00	RIV	54	22	12.2759	1.79213	0.0034986	0.0155847
Coordinated Regulator	ceh-74	M01248_2.00	RMD	71	38	16.1405	2.35432	2.64232e-07	0.0040825
Coordinated Regulator	ceh-74	M01248_2.00	RME	61	28	13.8672	2.01915	0.000155968	0.0229459
Coordinated Regulator	ceh-74	M01248_2.00	RMF	37	16	8.41127	1.90221	0.00604119	0.0403073
Coordinated Regulator	ceh-74	M01248_2.00	RMG	44	17	10.0026	1.69956	0.0152929	0.0429001
Other	ceh-74	M01248_2.00	RMH	36	17	8.18394	2.07724	0.00178893	0.0500973
Coordinated Regulator	ceh-74	M01248_2.00	SAA	47	21	10.6846	1.96545	0.00130119	0.0168462
Coordinated Regulator	ceh-74	M01248_2.00	SAB	55	26	12.5032	2.07946	0.000154183	0.00330052
Coordinated Regulator	ceh-74	M01248_2.00	SDQ	63	35	14.3219	2.44381	2.64232e-07	0.00693846
Coordinated Regulator	ceh-74	M01248_2.00	SIA	58	27	13.1852	2.04775	0.000155968	0.00168742
Coordinated Regulator	ceh-74	M01248_2.00	SIB	48	22	10.9119	2.01614	0.000712299	0.016511
Coordinated Regulator	ceh-74	M01248_2.00	SMB	40	19	9.09326	2.08946	0.000967089	0.00325529
Coordinated Regulator	ceh-74	M01248_2.00	SMD	68	36	15.4585	2.32881	6.65695e-07	0.00411917
Other	ceh-74	M01248_2.00	URA	46	21	10.4573	2.00818	0.000971242	0.0662767
Other	ceh-74	M01248_2.00	URB	44	17	10.0026	1.69956	0.0152929	0.60531
Other	ceh-74	M01248_2.00	URX	88	34	20.0052	1.69956	0.00108021	0.0821349
Coordinated Regulator	ceh-74	M01248_2.00	URY	47	21	10.6846	1.96545	0.00130119	0.00296784
Coordinated Regulator	ceh-74	M01248_2.00	VA	67	31	15.2312	2.03529	6.18897e-05	9.45273e-05
Coordinated Regulator	ceh-74	M01248_2.00	VB	61	30	13.8672	2.16337	2.33598e-05	0.000223583
Coordinated Regulator	ceh-74	M01248_2.00	VC	59	29	13.4126	2.16215	3.15776e-05	7.94106e-05
Coordinated Regulator	ceh-74	M01248_2.00	VD	49	22	11.1392	1.975	0.000962839	9.60628e-05
Other	ceh-58	M00676_2.00	ADA	47	29	15.4468	1.87741	0.000137661	0.0745513
Coordinated Regulator	ceh-58	M00676_2.00	ADE	66	41	21.6913	1.89016	6.53803e-06	0.00498437
Coordinated Regulator	ceh-58	M00676_2.00	ADF	114	65	37.4667	1.73487	9.55308e-07	0.00149484
Other	ceh-58	M00676_2.00	ADL	190	93	62.4445	1.48932	1.48754e-05	0.363755
Coordinated Regulator	ceh-58	M00676_2.00	AFD	96	58	31.5509	1.8383	3.70601e-07	0.000299905
Coordinated Regulator	ceh-58	M00676_2.00	AIA	53	37	17.4187	2.12415	5.00753e-07	0.00946626
Coordinated Regulator	ceh-58	M00676_2.00	AIB	54	37	17.7474	2.08481	9.20595e-07	0.0103898
Other	ceh-58	M00676_2.00	AIM	62	38	20.3766	1.86488	1.89433e-05	0.0525895
Coordinated Regulator	ceh-58	M00676_2.00	AIN	50	38	16.4328	2.31245	2.42825e-08	0.00348386
Coordinated Regulator	ceh-58	M00676_2.00	AIY	108	77	35.4948	2.16933	2.09848e-13	4.55443e-06
Coordinated Regulator	ceh-58	M00676_2.00	AIZ	54	34	17.7474	1.91577	2.39911e-05	0.0132695
Coordinated Regulator	ceh-58	M00676_2.00	ALA	55	35	18.076	1.93626	1.45949e-05	0.0116385
Coordinated Regulator	ceh-58	M00676_2.00	ALM	125	77	41.0819	1.8743	3.06951e-09	0.00205226
Coordinated Regulator	ceh-58	M00676_2.00	ALN	64	44	21.0339	2.09186	1.06934e-07	0.00595344
Other	ceh-58	M00676_2.00	AQR	70	36	23.0059	1.56482	0.00171042	0.107905
Coordinated Regulator	ceh-58	M00676_2.00	AS	61	36	20.048	1.79569	7.96091e-05	0.000862884
Coordinated Regulator	ceh-58	M00676_2.00	ASE	169	102	55.5427	1.83642	4.84723e-11	1.07892e-05
Coordinated Regulator	ceh-58	M00676_2.00	ASG	101	59	33.1942	1.77742	1.12035e-06	0.00752238
Other	ceh-58	M00676_2.00	ASH	179	98	58.8293	1.66584	4.33371e-08	0.185966
Coordinated Regulator	ceh-58	M00676_2.00	ASI	254	108	83.4785	1.29375	0.0013852	0.0299304
Coordinated Regulator	ceh-58	M00676_2.00	ASJ	147	75	48.3123	1.5524	1.81878e-05	0.00816171
Other	ceh-58	M00676_2.00	ASK	171	86	56.2001	1.53025	9.5917e-06	0.103119
Coordinated Regulator	ceh-58	M00676_2.00	AUA	62	41	20.3766	2.01211	8.8491e-07	0.00422095
Coordinated Regulator	ceh-58	M00676_2.00	AVA	86	59	28.2644	2.08743	1.41578e-09	0.000566448
Coordinated Regulator	ceh-58	M00676_2.00	AVB	57	41	18.7334	2.18861	5.5006e-08	0.00371394
Coordinated Regulator	ceh-58	M00676_2.00	AVD	66	44	21.6913	2.02847	2.88256e-07	0.00144958
Coordinated Regulator	ceh-58	M00676_2.00	AVE	64	44	21.0339	2.09186	1.06934e-07	0.014285
Other	ceh-58	M00676_2.00	AVF	41	28	13.4749	2.07794	1.74699e-05	0.122566
Coordinated Regulator	ceh-58	M00676_2.00	AVG	60	42	19.7193	2.12989	1.06934e-07	0.00689106
Coordinated Regulator	ceh-58	M00676_2.00	AVH	35	24	11.5029	2.08642	5.7035e-05	0.0457582
Coordinated Regulator	ceh-58	M00676_2.00	AVJ	40	27	13.1462	2.05382	3.13353e-05	0.0235904
Coordinated Regulator	ceh-58	M00676_2.00	AVK	47	33	15.4468	2.13636	1.61927e-06	0.0313307
Coordinated Regulator	ceh-58	M00676_2.00	AVL	41	28	13.4749	2.07794	1.74699e-05	0.0166947
Coordinated Regulator	ceh-58	M00676_2.00	AVM	93	59	30.5649	1.93032	4.96217e-08	0.00273544
Other	ceh-58	M00676_2.00	AWA	85	50	27.9357	1.78982	5.13381e-06	0.409238
Coordinated Regulator	ceh-58	M00676_2.00	AWB	119	62	39.11	1.58527	4.13729e-05	0.0105652
Coordinated Regulator	ceh-58	M00676_2.00	AWC	161	89	52.9135	1.68199	9.75013e-08	0.000148173
Coordinated Regulator	ceh-58	M00676_2.00	BAG	87	59	28.593	2.06344	2.17475e-09	0.00132528
Coordinated Regulator	ceh-58	M00676_2.00	BDU	68	43	22.3486	1.92406	2.33941e-06	0.00734446
Coordinated Regulator	ceh-58	M00676_2.00	CAN	89	58	29.2503	1.98288	2.13935e-08	0.00105873
Coordinated Regulator	ceh-58	M00676_2.00	CEP	69	44	22.6772	1.94027	1.31947e-06	1.82522e-05
Coordinated Regulator	ceh-58	M00676_2.00	DA	78	52	25.6351	2.02847	3.99417e-08	0.000767255
Coordinated Regulator	ceh-58	M00676_2.00	DB	63	43	20.7053	2.07676	1.77907e-07	0.00238772
Coordinated Regulator	ceh-58	M00676_2.00	DD	55	38	18.076	2.10223	5.05026e-07	0.0164322
Coordinated Regulator	ceh-58	M00676_2.00	DVA	75	55	24.6491	2.23131	1.5004e-10	0.00871144
Coordinated Regulator	ceh-58	M00676_2.00	DVB	46	31	15.1181	2.05052	9.67424e-06	0.0155847
Coordinated Regulator	ceh-58	M00676_2.00	DVC	49	31	16.1041	1.92497	4.61996e-05	0.00144958
Coordinated Regulator	ceh-58	M00676_2.00	FLP	72	41	23.6632	1.73265	7.41381e-05	0.000193172
Coordinated Regulator	ceh-58	M00676_2.00	HSN	122	76	40.0959	1.89545	2.17475e-09	1.2794e-06
Coordinated Regulator	ceh-58	M00676_2.00	I1	48	32	15.7755	2.02847	9.5917e-06	0.0108461
Coordinated Regulator	ceh-58	M00676_2.00	I2	55	38	18.076	2.10223	5.05026e-07	0.0152701
Coordinated Regulator	ceh-58	M00676_2.00	I3	46	32	15.1181	2.11666	2.98706e-06	0.0191721
Other	ceh-58	M00676_2.00	I4	42	29	13.8035	2.10091	9.67453e-06	0.199843
Coordinated Regulator	ceh-58	M00676_2.00	I5	47	30	15.4468	1.94215	4.83135e-05	0.0310714
Other	ceh-58	M00676_2.00	I6	40	29	13.1462	2.20596	2.71278e-06	0.127274
Other	ceh-58	M00676_2.00	IL1	55	36	18.076	1.99159	5.00697e-06	0.0686302
Coordinated Regulator	ceh-58	M00676_2.00	IL2	62	37	20.3766	1.81581	4.79122e-05	0.0363089
Other	ceh-58	M00676_2.00	LUA	50	30	16.4328	1.82562	0.000201192	0.0563262
Coordinated Regulator	ceh-58	M00676_2.00	M1	48	31	15.7755	1.96508	2.78684e-05	0.0174088
Coordinated Regulator	ceh-58	M00676_2.00	M2	43	29	14.1322	2.05205	1.74098e-05	0.0079213
Coordinated Regulator	ceh-58	M00676_2.00	M3	44	28	14.4608	1.93626	8.98248e-05	0.0116651
Coordinated Regulator	ceh-58	M00676_2.00	M4	52	33	17.0901	1.93095	2.52426e-05	0.0207815
Coordinated Regulator	ceh-58	M00676_2.00	M5	50	35	16.4328	2.12989	8.93691e-07	0.00189222
Coordinated Regulator	ceh-58	M00676_2.00	MC	37	26	12.1602	2.13811	1.72497e-05	0.0132328
Other	ceh-58	M00676_2.00	MI	40	25	13.1462	1.90169	0.000293943	0.27487
Coordinated Regulator	ceh-58	M00676_2.00	NSM	78	51	25.6351	1.98946	1.05904e-07	0.00363906
Coordinated Regulator	ceh-58	M00676_2.00	OLL	78	47	25.6351	1.83342	4.40943e-06	0.0363089
Coordinated Regulator	ceh-58	M00676_2.00	OLQ	75	49	24.6491	1.9879	1.68874e-07	0.012508
Coordinated Regulator	ceh-58	M00676_2.00	PDA	51	35	16.7614	2.08813	1.62394e-06	0.00324742
Coordinated Regulator	ceh-58	M00676_2.00	PDB	38	25	12.4889	2.00178	0.000102622	0.00854054
Coordinated Regulator	ceh-58	M00676_2.00	PDE	73	45	23.9918	1.87564	3.25769e-06	0.00568324
Other	ceh-58	M00676_2.00	PHA	163	88	53.5708	1.64269	2.93595e-07	0.107
Other	ceh-58	M00676_2.00	PHB	160	84	52.5849	1.59742	1.86518e-06	0.0578101
Other	ceh-58	M00676_2.00	PHC	52	31	17.0901	1.81392	0.00018422	0.217948
Coordinated Regulator	ceh-58	M00676_2.00	PLM	133	84	43.7112	1.92171	1.5004e-10	0.00182943
Other	ceh-58	M00676_2.00	PLN	51	33	16.7614	1.96881	1.56913e-05	0.0894912
Coordinated Regulator	ceh-58	M00676_2.00	PQR	99	54	32.5369	1.65966	2.88427e-05	0.00642072
Coordinated Regulator	ceh-58	M00676_2.00	PVC	80	54	26.2924	2.05382	1.32131e-08	0.00325529
Coordinated Regulator	ceh-58	M00676_2.00	PVD	97	53	31.8796	1.66251	3.19118e-05	0.00036363
Coordinated Regulator	ceh-58	M00676_2.00	PVM	84	52	27.607	1.88358	5.33448e-07	0.0078291
Coordinated Regulator	ceh-58	M00676_2.00	PVN	43	26	14.1322	1.83977	0.000431693	0.0397543
Coordinated Regulator	ceh-58	M00676_2.00	PVP	51	36	16.7614	2.14779	4.86933e-07	0.00829703
Coordinated Regulator	ceh-58	M00676_2.00	PVQ	83	57	27.2784	2.08957	2.17475e-09	0.00104979
Coordinated Regulator	ceh-58	M00676_2.00	PVR	54	36	17.7474	2.02847	2.98076e-06	0.0311126
Coordinated Regulator	ceh-58	M00676_2.00	PVT	153	73	50.2843	1.45175	0.000246265	0.0193325
Other	ceh-58	M00676_2.00	PVW	40	24	13.1462	1.82562	0.000783629	0.210981
Other	ceh-58	M00676_2.00	RIA	56	35	18.4047	1.90169	2.25945e-05	0.215227
Coordinated Regulator	ceh-58	M00676_2.00	RIB	55	37	18.076	2.04691	1.62394e-06	0.0330469
Coordinated Regulator	ceh-58	M00676_2.00	RIC	55	36	18.076	1.99159	5.00697e-06	0.0364399
Other	ceh-58	M00676_2.00	RID	53	29	17.4187	1.66487	0.00150374	0.222738
Coordinated Regulator	ceh-58	M00676_2.00	RIF	53	34	17.4187	1.95192	1.5081e-05	0.00557725
Coordinated Regulator	ceh-58	M00676_2.00	RIG	58	35	19.062	1.83611	5.53834e-05	0.00622
Other	ceh-58	M00676_2.00	RIH	49	32	16.1041	1.98707	1.62629e-05	0.167223
Other	ceh-58	M00676_2.00	RIM	64	39	21.0339	1.85415	1.77755e-05	0.133647
Coordinated Regulator	ceh-58	M00676_2.00	RIP	36	22	11.8316	1.85943	0.000925579	0.0330469
Coordinated Regulator	ceh-58	M00676_2.00	RIR	34	23	11.1743	2.0583	0.000106779	0.0242847
Other	ceh-58	M00676_2.00	RIS	49	32	16.1041	1.98707	1.62629e-05	0.0631347
Coordinated Regulator	ceh-58	M00676_2.00	RIV	54	35	17.7474	1.97212	8.81697e-06	0.000335509
Coordinated Regulator	ceh-58	M00676_2.00	RMD	71	50	23.3345	2.14275	6.52415e-09	0.00106594
Other	ceh-58	M00676_2.00	RME	61	42	20.048	2.09497	1.77907e-07	0.0708792
Coordinated Regulator	ceh-58	M00676_2.00	RMF	37	26	12.1602	2.13811	1.72497e-05	0.0113531
Other	ceh-58	M00676_2.00	RMG	44	28	14.4608	1.93626	8.98248e-05	0.15748
Other	ceh-58	M00676_2.00	RMH	36	25	11.8316	2.11299	3.1343e-05	0.0643769
Coordinated Regulator	ceh-58	M00676_2.00	SAA	47	31	15.4468	2.00689	1.68172e-05	0.0281991
Coordinated Regulator	ceh-58	M00676_2.00	SAB	55	37	18.076	2.04691	1.62394e-06	0.00349594
Coordinated Regulator	ceh-58	M00676_2.00	SDQ	63	43	20.7053	2.07676	1.77907e-07	0.000345724
Coordinated Regulator	ceh-58	M00676_2.00	SIA	58	40	19.062	2.09841	2.88256e-07	0.00818292
Coordinated Regulator	ceh-58	M00676_2.00	SIB	48	33	15.7755	2.09186	3.01796e-06	0.0032458
Coordinated Regulator	ceh-58	M00676_2.00	SMB	40	28	13.1462	2.12989	9.60279e-06	0.0148949
Coordinated Regulator	ceh-58	M00676_2.00	SMD	68	47	22.3486	2.10304	3.99417e-08	0.00112543
Coordinated Regulator	ceh-58	M00676_2.00	URA	46	33	15.1181	2.18281	8.44363e-07	0.0329754
Other	ceh-58	M00676_2.00	URB	44	29	14.4608	2.00542	3.01975e-05	0.0976584
Coordinated Regulator	ceh-58	M00676_2.00	URX	88	54	28.9217	1.86711	4.82716e-07	0.00286247
Coordinated Regulator	ceh-58	M00676_2.00	URY	47	32	15.4468	2.07163	5.40616e-06	0.0321007
Coordinated Regulator	ceh-58	M00676_2.00	VA	67	43	22.0199	1.95278	1.3741e-06	3.1962e-05
Coordinated Regulator	ceh-58	M00676_2.00	VB	61	44	20.048	2.19474	2.00366e-08	0.000199455
Coordinated Regulator	ceh-58	M00676_2.00	VC	59	38	19.3907	1.95971	4.75698e-06	0.00557884
Coordinated Regulator	ceh-58	M00676_2.00	VD	49	34	16.1041	2.11126	1.62394e-06	0.00632189
Coordinated Regulator	ceh-5	M02179_2.00	AIN	50	31	13.0188	2.38117	9.51749e-07	9.98617e-06
Other	ceh-62	M02187_2.00	AIB	54	27	11.0935	2.43387	8.3479e-06	0.529026
Other	ceh-62	M02187_2.00	PHA	163	60	33.4858	1.7918	7.12947e-06	0.305993
Other	ceh-62	M02187_2.00	RIG	58	28	11.9152	2.34994	1.18259e-05	0.565452
Other	ceh-62	M02187_2.00	RIM	64	27	13.1478	2.05357	0.000190447	0.659389
Other	ceh-62	M02187_2.00	RIS	49	21	10.0663	2.08617	0.00070099	0.80367
Coordinated Regulator	unc-62	M02185_2.00	ADA	47	28	15.0398	1.86173	0.000239489	0.00533643
Coordinated Regulator	unc-62	M02185_2.00	ADE	66	31	21.1197	1.46782	0.0099044	0.000819424
Coordinated Regulator	unc-62	M02185_2.00	AIB	54	36	17.2798	2.08336	1.62394e-06	0.000742262
Coordinated Regulator	unc-62	M02185_2.00	AIZ	54	35	17.2798	2.02549	5.00697e-06	0.000111933
Coordinated Regulator	unc-62	M02185_2.00	ALA	55	35	17.5998	1.98866	8.39264e-06	0.00129512
Coordinated Regulator	unc-62	M02185_2.00	ALM	125	65	39.9995	1.62502	1.39805e-05	1.44314e-05
Coordinated Regulator	unc-62	M02185_2.00	AQR	70	33	22.3997	1.47323	0.00755525	0.00385286
Coordinated Regulator	unc-62	M02185_2.00	AS	61	35	19.5198	1.79306	0.000113994	3.94491e-05
Coordinated Regulator	unc-62	M02185_2.00	AVM	93	55	29.7596	1.84814	7.13039e-07	9.98617e-06
Coordinated Regulator	unc-62	M02185_2.00	BDU	68	41	21.7597	1.88421	8.54024e-06	0.0103898
Coordinated Regulator	unc-62	M02185_2.00	DA	78	46	24.9597	1.84297	5.42034e-06	1.191e-05
Coordinated Regulator	unc-62	M02185_2.00	DB	63	38	20.1597	1.88494	1.67953e-05	2.65768e-05
Coordinated Regulator	unc-62	M02185_2.00	DD	55	34	17.5998	1.93184	2.25945e-05	0.00145826
Coordinated Regulator	unc-62	M02185_2.00	DVA	75	48	23.9997	2.00002	2.16882e-07	6.91286e-05
Coordinated Regulator	unc-62	M02185_2.00	FLP	72	36	23.0397	1.56252	0.00189333	7.74105e-05
Coordinated Regulator	unc-62	M02185_2.00	HSN	122	69	39.0395	1.76744	2.7467e-07	2.7407e-08
Coordinated Regulator	unc-62	M02185_2.00	I4	42	22	13.4398	1.63693	0.00652617	0.00368428
Coordinated Regulator	unc-62	M02185_2.00	PDB	38	21	12.1598	1.727	0.00375039	0.00287586
Coordinated Regulator	unc-62	M02185_2.00	PDE	73	33	23.3597	1.41269	0.0147498	0.00390974
Coordinated Regulator	unc-62	M02185_2.00	PHA	163	80	52.1594	1.53376	1.87515e-05	0.00586101
Coordinated Regulator	unc-62	M02185_2.00	PQR	99	50	31.6796	1.5783	0.000257456	0.000501702
Coordinated Regulator	unc-62	M02185_2.00	PVD	97	47	31.0396	1.51419	0.00102043	1.84514e-05
Coordinated Regulator	unc-62	M02185_2.00	PVM	84	46	26.8797	1.71133	4.81889e-05	8.95599e-05
Coordinated Regulator	unc-62	M02185_2.00	RIA	56	34	17.9198	1.89735	3.62047e-05	0.000350141
Coordinated Regulator	unc-62	M02185_2.00	RIC	55	35	17.5998	1.98866	8.39264e-06	0.00065855
Coordinated Regulator	unc-62	M02185_2.00	RIF	53	33	16.9598	1.94578	2.44075e-05	0.000345724
Coordinated Regulator	unc-62	M02185_2.00	RIG	58	32	18.5598	1.72416	0.000494847	0.000539365
Coordinated Regulator	unc-62	M02185_2.00	RMG	44	27	14.0798	1.91764	0.000164496	0.00325529
Coordinated Regulator	unc-62	M02185_2.00	SAB	55	35	17.5998	1.98866	8.39264e-06	0.00960347
Coordinated Regulator	unc-62	M02185_2.00	SDQ	63	39	20.1597	1.93455	6.46101e-06	2.25957e-05
Coordinated Regulator	unc-62	M02185_2.00	VA	67	38	21.4397	1.77241	8.37018e-05	1.82995e-05
Coordinated Regulator	unc-62	M02185_2.00	VB	61	36	19.5198	1.84429	4.61274e-05	7.8748e-06
Coordinated Regulator	unc-62	M02185_2.00	VC	59	36	18.8798	1.9068	1.93539e-05	3.54672e-05
Coordinated Regulator	unc-62	M02185_2.00	VD	49	31	15.6798	1.97707	2.81252e-05	7.21869e-05
Coordinated Regulator	ceh-18	M00681_2.00	ADA	47	31	21.7107	1.42787	0.0066549	0.00336674
Coordinated Regulator	ceh-18	M00681_2.00	AIB	54	37	24.9442	1.48331	0.0013852	0.000674567
Coordinated Regulator	ceh-18	M00681_2.00	AIN	50	33	23.0964	1.42879	0.0052513	0.00018649
Coordinated Regulator	ceh-18	M00681_2.00	ALA	55	37	25.4061	1.45634	0.00212976	9.17998e-05
Coordinated Regulator	ceh-18	M00681_2.00	ALM	125	81	57.7411	1.40281	6.93863e-05	1.86975e-06
Coordinated Regulator	ceh-18	M00681_2.00	ALN	64	42	29.5635	1.42067	0.00219258	0.00027893
Coordinated Regulator	ceh-18	M00681_2.00	AS	61	41	28.1777	1.45505	0.00135419	2.26096e-05
Coordinated Regulator	ceh-18	M00681_2.00	ASG	101	63	46.6548	1.35034	0.0013852	0.000272435
Coordinated Regulator	ceh-18	M00681_2.00	AUA	62	44	28.6396	1.53633	0.000187117	6.91286e-05
Coordinated Regulator	ceh-18	M00681_2.00	AVA	86	63	39.7259	1.58587	2.55919e-06	4.78868e-08
Coordinated Regulator	ceh-18	M00681_2.00	AVB	57	37	26.3299	1.40524	0.00483391	2.41874e-05
Coordinated Regulator	ceh-18	M00681_2.00	AVD	66	43	30.4873	1.41042	0.00236596	1.21042e-05
Coordinated Regulator	ceh-18	M00681_2.00	AVG	60	43	27.7157	1.55147	0.000159885	6.00655e-05
Coordinated Regulator	ceh-18	M00681_2.00	AVH	35	22	16.1675	1.36075	0.0384855	0.00493833
Coordinated Regulator	ceh-18	M00681_2.00	AVK	47	33	21.7107	1.51999	0.00135807	0.0235088
Coordinated Regulator	ceh-18	M00681_2.00	AVM	93	62	42.9594	1.44322	0.000153731	4.23052e-06
Coordinated Regulator	ceh-18	M00681_2.00	AWB	119	65	54.9695	1.18247	0.0429858	0.000775541
Coordinated Regulator	ceh-18	M00681_2.00	AWC	161	104	74.3706	1.3984	1.01903e-05	8.5775e-05
Coordinated Regulator	ceh-18	M00681_2.00	BDU	68	46	31.4112	1.46445	0.000618871	0.000485948
Coordinated Regulator	ceh-18	M00681_2.00	DA	78	49	36.0305	1.35996	0.00343751	1.15389e-06
Coordinated Regulator	ceh-18	M00681_2.00	DB	63	40	29.1015	1.3745	0.00581815	0.000156193
Coordinated Regulator	ceh-18	M00681_2.00	DD	55	38	25.4061	1.4957	0.000976045	0.0025454
Coordinated Regulator	ceh-18	M00681_2.00	DVA	75	53	34.6447	1.52982	5.38828e-05	7.90586e-05
Coordinated Regulator	ceh-18	M00681_2.00	DVB	46	33	21.2487	1.55303	0.000809989	0.00371394
Coordinated Regulator	ceh-18	M00681_2.00	FLP	72	49	33.2589	1.47329	0.000354863	0.00232133
Coordinated Regulator	ceh-18	M00681_2.00	HSN	122	90	56.3553	1.59701	2.4418e-08	2.72857e-09
Coordinated Regulator	ceh-18	M00681_2.00	I5	47	32	21.7107	1.47393	0.00309556	0.0117779
Coordinated Regulator	ceh-18	M00681_2.00	IL1	55	34	25.4061	1.33826	0.0167916	0.00419487
Piecemeal Regulator	ceh-18	M00681_2.00	MC	37	22	17.0914	1.2872	0.0763396	0.0167522
Coordinated Regulator	ceh-18	M00681_2.00	MI	40	25	18.4772	1.35302	0.0310518	0.0451638
Coordinated Regulator	ceh-18	M00681_2.00	OLL	78	46	36.0305	1.2767	0.0183431	0.000424757
Coordinated Regulator	ceh-18	M00681_2.00	OLQ	75	43	34.6447	1.24117	0.0376533	0.000618819
Coordinated Regulator	ceh-18	M00681_2.00	PDA	51	34	23.5584	1.44322	0.00376572	0.000396
Coordinated Regulator	ceh-18	M00681_2.00	PDB	38	24	17.5533	1.36726	0.0294897	0.00528607
Coordinated Regulator	ceh-18	M00681_2.00	PLM	133	88	61.4365	1.43237	1.34629e-05	3.64553e-08
Piecemeal Regulator	ceh-18	M00681_2.00	PLN	51	30	23.5584	1.27343	0.0509009	0.00341713
Coordinated Regulator	ceh-18	M00681_2.00	PVC	80	56	36.9543	1.51538	4.9711e-05	1.62847e-08
Coordinated Regulator	ceh-18	M00681_2.00	PVD	97	63	44.8071	1.40603	0.000362174	4.2985e-07
Coordinated Regulator	ceh-18	M00681_2.00	PVM	84	57	38.802	1.469	0.000143165	5.2902e-06
Coordinated Regulator	ceh-18	M00681_2.00	PVP	51	34	23.5584	1.44322	0.00376572	0.000299712
Coordinated Regulator	ceh-18	M00681_2.00	PVQ	83	55	38.3401	1.43453	0.000415028	1.54554e-05
Coordinated Regulator	ceh-18	M00681_2.00	PVR	54	35	24.9442	1.40313	0.00608689	0.00390897
Coordinated Regulator	ceh-18	M00681_2.00	RIC	55	38	25.4061	1.4957	0.000976045	0.000630576
Coordinated Regulator	ceh-18	M00681_2.00	RIF	53	36	24.4822	1.47045	0.00193186	0.000114885
Coordinated Regulator	ceh-18	M00681_2.00	RIH	49	30	22.6345	1.32541	0.0275709	0.0252558
Piecemeal Regulator	ceh-18	M00681_2.00	SAA	47	24	21.7107	1.10545	0.301313	0.00345177
Coordinated Regulator	ceh-18	M00681_2.00	SAB	55	33	25.4061	1.2989	0.0305412	0.000180086
Coordinated Regulator	ceh-18	M00681_2.00	SDQ	63	41	29.1015	1.40886	0.00300869	8.20709e-05
Coordinated Regulator	ceh-18	M00681_2.00	SIA	58	36	26.7919	1.34369	0.0131655	4.13816e-06
Piecemeal Regulator	ceh-18	M00681_2.00	SMB	40	24	18.4772	1.2989	0.0589832	0.00314285
Coordinated Regulator	ceh-18	M00681_2.00	URY	47	30	21.7107	1.38181	0.0136093	0.000401092
Coordinated Regulator	ceh-18	M00681_2.00	VA	67	46	30.9492	1.4863	0.000398372	2.41644e-06
Coordinated Regulator	ceh-18	M00681_2.00	VB	61	39	28.1777	1.38407	0.00548895	4.0935e-06
Coordinated Regulator	ceh-18	M00681_2.00	VD	49	34	22.6345	1.50213	0.00154118	0.000959297
Coordinated Regulator	unc-86	M03312_2.00	ADA	47	41	32.4023	1.26534	0.0046678	0.00332131
Piecemeal Regulator	unc-86	M03312_2.00	ADL	190	140	130.988	1.0688	0.0919405	0.0018589
Coordinated Regulator	unc-86	M03312_2.00	AIM	62	53	42.7434	1.23996	0.00343907	0.000207108
Coordinated Regulator	unc-86	M03312_2.00	AIZ	54	48	37.2281	1.28935	0.0010478	4.12074e-06
Coordinated Regulator	unc-86	M03312_2.00	ALM	125	103	86.1762	1.19523	0.000923933	4.78868e-08
Coordinated Regulator	unc-86	M03312_2.00	ALN	64	56	44.1222	1.2692	0.000953145	1.56678e-06
Coordinated Regulator	unc-86	M03312_2.00	AQR	70	61	48.2587	1.26402	0.000722185	1.08659e-05
Coordinated Regulator	unc-86	M03312_2.00	AVM	93	79	64.1151	1.23216	0.000663105	3.64553e-08
Coordinated Regulator	unc-86	M03312_2.00	BDU	68	59	46.8799	1.25854	0.00107529	1.78588e-06
Coordinated Regulator	unc-86	M03312_2.00	FLP	72	63	49.6375	1.2692	0.000483972	1.03298e-05
Coordinated Regulator	unc-86	M03312_2.00	HSN	122	111	84.108	1.31973	1.17582e-07	2.39877e-11
Coordinated Regulator	unc-86	M03312_2.00	I1	48	43	33.0917	1.29942	0.00133794	3.62118e-05
Coordinated Regulator	unc-86	M03312_2.00	IL2	62	51	42.7434	1.19317	0.0159336	0.000164616
Coordinated Regulator	unc-86	M03312_2.00	NSM	78	70	53.774	1.30175	4.77021e-05	5.31182e-08
Coordinated Regulator	unc-86	M03312_2.00	PHC	52	44	35.8493	1.22736	0.0101184	0.00181926
Coordinated Regulator	unc-86	M03312_2.00	PLM	133	109	91.6915	1.18877	0.000953145	2.82348e-09
Coordinated Regulator	unc-86	M03312_2.00	PLN	51	43	35.1599	1.22298	0.0121698	0.000488019
Coordinated Regulator	unc-86	M03312_2.00	PQR	99	86	68.2516	1.26004	9.0965e-05	6.05994e-08
Coordinated Regulator	unc-86	M03312_2.00	PVD	97	84	66.8727	1.25612	0.000134739	4.0935e-06
Coordinated Regulator	unc-86	M03312_2.00	PVM	84	73	57.9104	1.26057	0.000288642	4.86612e-08
Coordinated Regulator	unc-86	M03312_2.00	PVR	54	47	37.2281	1.26249	0.00282771	0.00160669
Other	unc-86	M03312_2.00	PVW	40	33	27.5764	1.19668	0.0445213	0.0864043
Coordinated Regulator	unc-86	M03312_2.00	RIH	49	43	33.7811	1.2729	0.00305173	0.00132345
Coordinated Regulator	unc-86	M03312_2.00	RIP	36	30	24.8188	1.20876	0.0439029	0.00140871
Coordinated Regulator	unc-86	M03312_2.00	RIR	34	29	23.4399	1.2372	0.027988	0.000303128
Coordinated Regulator	unc-86	M03312_2.00	RMG	44	38	30.334	1.25272	0.00865691	7.49253e-05
Coordinated Regulator	unc-86	M03312_2.00	SDQ	63	58	43.4328	1.3354	3.99541e-05	3.87629e-07
Coordinated Regulator	unc-86	M03312_2.00	URA	46	40	31.7128	1.26132	0.00571899	0.000784063
Coordinated Regulator	unc-86	M03312_2.00	URB	44	37	30.334	1.21975	0.0208137	0.0372065
Coordinated Regulator	unc-86	M03312_2.00	URX	88	78	60.6681	1.28568	4.69568e-05	5.97985e-07
Coordinated Regulator	unc-86	M03312_2.00	URY	47	40	32.4023	1.23448	0.0115117	0.00232705
Coordinated Regulator	unc-86	M02244_2.00	ADA	47	25	13.5428	1.84599	0.000783629	0.00369977
Coordinated Regulator	unc-86	M02244_2.00	ADL	190	73	54.7477	1.33339	0.00388367	0.00344806
Coordinated Regulator	unc-86	M02244_2.00	AIM	62	29	17.865	1.62328	0.00311398	0.000531927
Coordinated Regulator	unc-86	M02244_2.00	AIZ	54	32	15.5599	2.05657	1.5046e-05	0.000823397
Coordinated Regulator	unc-86	M02244_2.00	ALM	125	62	36.0182	1.72135	5.00697e-06	2.10076e-05
Coordinated Regulator	unc-86	M02244_2.00	ALN	64	36	18.4413	1.95214	1.87515e-05	8.71022e-06
Coordinated Regulator	unc-86	M02244_2.00	AQR	70	36	20.1702	1.78481	0.000159885	0.00344041
Coordinated Regulator	unc-86	M02244_2.00	AVM	93	53	26.7976	1.97779	2.16882e-07	0.000101744
Coordinated Regulator	unc-86	M02244_2.00	BDU	68	36	19.5939	1.83731	8.22489e-05	0.00288522
Coordinated Regulator	unc-86	M02244_2.00	FLP	72	35	20.7465	1.68703	0.000638815	0.000481379
Coordinated Regulator	unc-86	M02244_2.00	HSN	122	70	35.1538	1.99125	3.06951e-09	1.83723e-05
Coordinated Regulator	unc-86	M02244_2.00	I1	48	20	13.831	1.44603	0.0417815	0.00198642
Coordinated Regulator	unc-86	M02244_2.00	IL2	62	27	17.865	1.51133	0.0115849	0.00132528
Coordinated Regulator	unc-86	M02244_2.00	NSM	78	39	22.4754	1.73523	0.000177263	3.2187e-05
Coordinated Regulator	unc-86	M02244_2.00	PHC	52	28	14.9836	1.86871	0.00032732	0.000715436
Coordinated Regulator	unc-86	M02244_2.00	PLM	133	70	38.3234	1.82656	1.46932e-07	5.97985e-07
Coordinated Regulator	unc-86	M02244_2.00	PLN	51	25	14.6954	1.70121	0.00282771	0.00360504
Coordinated Regulator	unc-86	M02244_2.00	PQR	99	49	28.5264	1.71771	4.17684e-05	0.000958815
Coordinated Regulator	unc-86	M02244_2.00	PVD	97	48	27.9501	1.71734	4.92187e-05	0.000249365
Coordinated Regulator	unc-86	M02244_2.00	PVM	84	51	24.2042	2.10707	4.21171e-08	5.48273e-06
Coordinated Regulator	unc-86	M02244_2.00	PVR	54	27	15.5599	1.73523	0.00147108	0.00146652
Coordinated Regulator	unc-86	M02244_2.00	PVW	40	18	11.5258	1.56171	0.024315	0.0336178
Piecemeal Regulator	unc-86	M02244_2.00	RIH	49	17	14.1191	1.20404	0.225635	0.0298311
Other	unc-86	M02244_2.00	RIP	36	17	10.3732	1.63883	0.0171937	0.0528034
Coordinated Regulator	unc-86	M02244_2.00	RIR	34	15	9.79695	1.53109	0.0443822	0.0120563
Coordinated Regulator	unc-86	M02244_2.00	RMG	44	22	12.6784	1.73523	0.00362206	0.0143663
Coordinated Regulator	unc-86	M02244_2.00	SDQ	63	39	18.1532	2.14838	5.56616e-07	6.01285e-05
Piecemeal Regulator	unc-86	M02244_2.00	URA	46	19	13.2547	1.43345	0.050342	0.0130147
Other	unc-86	M02244_2.00	URB	44	16	12.6784	1.26199	0.176193	0.145594
Coordinated Regulator	unc-86	M02244_2.00	URX	88	45	25.3568	1.77467	3.39546e-05	0.000469336
Coordinated Regulator	unc-86	M02244_2.00	URY	47	25	13.5428	1.84599	0.000783629	8.86464e-05
Coordinated Regulator	unc-42	M03874_2.00	AIB	54	29	16.3231	1.77663	0.000587575	3.93324e-06
Coordinated Regulator	unc-42	M03874_2.00	ASH	179	81	54.108	1.49701	5.32458e-05	0.0140043
Coordinated Regulator	unc-42	M03874_2.00	AVA	86	53	25.996	2.03877	5.35902e-08	0.000148154
Coordinated Regulator	unc-42	M03874_2.00	AVB	57	35	17.2299	2.03135	6.79138e-06	0.000100104
Coordinated Regulator	unc-42	M03874_2.00	AVD	66	36	19.9504	1.80447	0.000102928	0.000488109
Coordinated Regulator	unc-42	M03874_2.00	AVE	64	37	19.3459	1.91255	1.93539e-05	0.000581306
Coordinated Regulator	unc-42	M03874_2.00	AVH	35	20	10.5798	1.8904	0.00150479	0.000973456
Coordinated Regulator	unc-42	M03874_2.00	AVK	47	25	14.2071	1.75968	0.00150911	0.00135499
Coordinated Regulator	unc-42	M03874_2.00	RIV	54	32	16.3231	1.96041	3.62573e-05	0.00133434
Coordinated Regulator	unc-42	M03874_2.00	RMD	71	38	21.4618	1.77059	0.000108389	0.00233098
Coordinated Regulator	unc-42	M03874_2.00	RMF	37	23	11.1843	2.05645	0.000164496	0.0108461
Coordinated Regulator	unc-42	M03874_2.00	RMH	36	21	10.8821	1.92978	0.00085922	0.0252558
Coordinated Regulator	unc-42	M03874_2.00	SAA	47	29	14.2071	2.04123	3.19118e-05	0.000825045
Coordinated Regulator	unc-42	M03874_2.00	SIB	48	27	14.5094	1.86086	0.00037606	0.00808243
Coordinated Regulator	unc-42	M03874_2.00	SMD	68	38	20.555	1.8487	3.69794e-05	0.000237531
Coordinated Regulator	lim-7	M01242_2.00	AFD	96	55	35.6214	1.54402	0.000133575	0.00196143
Coordinated Regulator	lim-7	M01242_2.00	AIB	54	36	20.037	1.79667	3.83993e-05	0.0130357
Coordinated Regulator	lim-7	M01242_2.00	AIM	62	37	23.0055	1.60831	0.000554506	0.00236939
Other	lim-7	M01242_2.00	ALA	55	34	20.4081	1.66601	0.000405008	0.234137
Coordinated Regulator	lim-7	M01242_2.00	AVB	57	34	21.1502	1.60755	0.000895081	0.040272
Coordinated Regulator	lim-7	M01242_2.00	AWC	161	88	59.74	1.47305	1.91972e-05	0.0143176
Coordinated Regulator	lim-7	M01242_2.00	BAG	87	50	32.2819	1.54886	0.000235072	0.00833875
Other	lim-7	M01242_2.00	I4	42	24	15.5844	1.54001	0.00838616	0.470837
Other	lim-7	M01242_2.00	M1	48	28	17.8107	1.57209	0.00339646	0.0975666
Other	lim-7	M01242_2.00	M5	50	28	18.5528	1.50921	0.00670144	0.0790376
Other	lim-7	M01242_2.00	MC	37	22	13.7291	1.60244	0.00636026	0.174888
Other	lim-7	M01242_2.00	MI	40	23	14.8422	1.54963	0.00884845	0.747077
Other	lim-7	M01242_2.00	OLL	78	42	28.9424	1.45116	0.00294103	0.111155
Other	lim-7	M01242_2.00	PHC	52	29	19.2949	1.50299	0.0063291	0.0631357
Other	lim-7	M01242_2.00	PQR	99	54	36.7345	1.47001	0.000642276	0.35045
Coordinated Regulator	lim-7	M01242_2.00	PVC	80	51	29.6845	1.71807	7.22327e-06	0.0423849
Other	lim-7	M01242_2.00	PVN	43	23	15.9554	1.44152	0.0237898	0.103008
Other	lim-7	M01242_2.00	RIA	56	32	20.7791	1.54001	0.00281467	0.304244
Other	lim-7	M01242_2.00	RME	61	36	22.6344	1.5905	0.00083334	0.220342
Other	lim-7	M01242_2.00	URY	47	27	17.4396	1.5482	0.0050847	0.13532
Coordinated Regulator	ceh-14	M00435_2.00	ADA	47	40	26.9992	1.48153	0.000138936	0.00454332
Coordinated Regulator	ceh-14	M00435_2.00	AFD	96	78	55.1472	1.4144	4.59786e-06	6.49289e-05
Coordinated Regulator	ceh-14	M00435_2.00	AIM	62	51	35.6159	1.43194	9.55349e-05	0.000118433
Coordinated Regulator	ceh-14	M00435_2.00	ALA	55	45	31.5948	1.42429	0.000293349	0.000804345
Coordinated Regulator	ceh-14	M00435_2.00	BDU	68	60	39.0626	1.536	4.39003e-07	6.76357e-05
Coordinated Regulator	ceh-14	M00435_2.00	DVC	49	39	28.1481	1.38553	0.00165485	0.00488371
Coordinated Regulator	ceh-14	M00435_2.00	I2	55	46	31.5948	1.45594	0.000101234	0.00459992
Coordinated Regulator	ceh-14	M00435_2.00	PHA	163	125	93.6354	1.33497	1.73662e-06	0.00160464
Coordinated Regulator	ceh-14	M00435_2.00	PHB	160	117	91.912	1.27296	8.74884e-05	0.00379898
Coordinated Regulator	ceh-14	M00435_2.00	PHC	52	43	29.8714	1.4395	0.000264226	0.00133432
Coordinated Regulator	ceh-14	M00435_2.00	PVC	80	66	45.956	1.43616	9.52964e-06	2.17438e-07
Coordinated Regulator	ceh-14	M00435_2.00	PVN	43	35	24.7014	1.41693	0.00146173	0.00766746
Coordinated Regulator	ceh-14	M00435_2.00	PVQ	83	70	47.6794	1.46814	1.32549e-06	1.40694e-06
Coordinated Regulator	ceh-14	M00435_2.00	PVR	54	44	31.0203	1.41843	0.000393205	0.00326139
Coordinated Regulator	ceh-14	M00435_2.00	PVT	153	101	87.8909	1.14915	0.0213618	0.0217468
Coordinated Regulator	ceh-14	M00435_2.00	PVW	40	31	22.978	1.34912	0.00857784	0.014285
Other	vab-3	M00342_2.00	ADA	47	28	17.7554	1.57699	0.00305173	0.857788
Coordinated Regulator	vab-3	M00342_2.00	ALM	125	68	47.2218	1.44001	0.000289838	0.00299527
Coordinated Regulator	vab-3	M00342_2.00	AS	61	34	23.0442	1.47542	0.004694	0.00304968
Other	vab-3	M00342_2.00	ASK	171	92	64.5994	1.42416	5.01007e-05	0.165108
Coordinated Regulator	vab-3	M00342_2.00	AVD	66	41	24.9331	1.6444	0.000150174	0.0221501
Coordinated Regulator	vab-3	M00342_2.00	BAG	87	47	32.8664	1.43003	0.00237868	0.00316078
Other	vab-3	M00342_2.00	CEP	69	38	26.0664	1.45781	0.00381009	0.405336
Coordinated Regulator	vab-3	M00342_2.00	DB	63	39	23.7998	1.63867	0.000235072	0.0065948
Coordinated Regulator	vab-3	M00342_2.00	OLL	78	40	29.4664	1.35748	0.0125443	0.0206028
Other	vab-3	M00342_2.00	OLQ	75	41	28.3331	1.44707	0.00327419	0.549761
Coordinated Regulator	vab-3	M00342_2.00	PLM	133	75	50.244	1.49272	3.75768e-05	0.00536984
Other	vab-3	M00342_2.00	PVM	84	46	31.7331	1.44959	0.00191285	0.0578101
Coordinated Regulator	vab-3	M00342_2.00	RIF	53	32	20.022	1.59824	0.0012902	0.00492228
Other	vab-3	M00342_2.00	RIV	54	31	20.3998	1.51962	0.00388367	0.0540504
Coordinated Regulator	vab-3	M00342_2.00	SAA	47	28	17.7554	1.57699	0.00305173	0.00404069
Coordinated Regulator	vab-3	M00342_2.00	SMB	40	23	15.111	1.52207	0.0109943	0.0439803
Other	vab-3	M00342_2.00	URA	46	25	17.3776	1.43863	0.0189453	0.186263
Other	vab-3	M00342_2.00	URB	44	22	16.6221	1.32354	0.0692714	0.418486
Coordinated Regulator	vab-3	M00342_2.00	URY	47	27	17.7554	1.52066	0.00647758	0.0169811
Coordinated Regulator	vab-3	M00342_2.00	VA	67	43	25.3109	1.69887	4.00921e-05	0.000339674
Coordinated Regulator	vab-3	M00342_2.00	VB	61	39	23.0442	1.6924	9.67323e-05	0.00116781
Coordinated Regulator	vab-3	M00342_2.00	VD	49	27	18.5109	1.4586	0.0124188	0.00869045
Coordinated Regulator	ceh-23	M00671_2.00	ADF	114	68	48.0532	1.4151	0.000306568	0.0378379
Other	ceh-23	M00671_2.00	ADL	190	109	80.0886	1.36099	5.5629e-05	0.345932
Coordinated Regulator	ceh-23	M00671_2.00	AFD	96	68	40.4658	1.68043	2.11792e-07	0.0362558
Coordinated Regulator	ceh-23	M00671_2.00	AIY	108	80	45.524	1.75731	1.59516e-09	8.81693e-05
Coordinated Regulator	ceh-23	M00671_2.00	ASE	169	96	71.2367	1.34762	0.000224223	0.00354432
Coordinated Regulator	ceh-23	M00671_2.00	ASG	101	63	42.5734	1.4798	0.000101609	0.000966102
Other	ceh-23	M00671_2.00	ASH	179	109	75.4519	1.44463	2.57088e-06	0.353656
Other	ceh-23	M00671_2.00	AWA	85	50	35.8291	1.39551	0.0022956	0.191282
Coordinated Regulator	ceh-23	M00671_2.00	AWC	161	104	67.8645	1.53246	1.55427e-07	7.71086e-05
Coordinated Regulator	ceh-23	M00671_2.00	BAG	87	55	36.6721	1.49978	0.000166333	0.000812716
Coordinated Regulator	ceh-23	M00671_2.00	CAN	89	65	37.5152	1.73263	9.16598e-08	0.00272379
Other	ceh-23	M00671_2.00	PHA	163	103	68.7076	1.49911	5.45087e-07	0.0571082
Other	ceh-23	M00671_2.00	PHB	160	100	67.443	1.48273	1.46536e-06	0.0546674
Other	ceh-23	M00671_2.00	PHC	52	35	21.919	1.59679	0.000491921	0.15786
Other	irx-1	M02064_2.00	ASG	101	32	19.6029	1.63241	0.00339627	0.524363
Other	irx-1	M02064_2.00	AVF	41	15	7.9576	1.88499	0.0097805	0.552326
Other	irx-1	M02064_2.00	AVG	60	24	11.6453	2.06092	0.000431041	0.855449
Other	irx-1	M02064_2.00	DD	55	22	10.6748	2.06092	0.000706381	0.090371
Other	irx-1	M02064_2.00	I5	47	17	9.12213	1.8636	0.00711077	0.39736
Other	irx-1	M02064_2.00	I6	40	10	7.76351	1.28808	0.23931	0.436495
Other	irx-1	M02064_2.00	M2	43	13	8.34577	1.55767	0.0631944	0.496199
Other	irx-1	M02064_2.00	M4	52	19	10.0926	1.88257	0.00425866	0.311924
Other	irx-1	M02064_2.00	M5	50	13	9.70439	1.3396	0.161239	0.35045
Other	irx-1	M02064_2.00	PVQ	83	31	16.1093	1.92436	0.000275123	0.165638
Piecemeal Regulator	irx-1	M02064_2.00	PVT	153	36	29.6954	1.21231	0.121588	0.0250626
Other	irx-1	M02064_2.00	RIH	49	18	9.5103	1.89268	0.00496655	0.36192
Coordinated Regulator	irx-1	M02064_2.00	RIS	49	16	9.5103	1.68239	0.0224802	0.041761
Other	irx-1	M02064_2.00	SAB	55	22	10.6748	2.06092	0.000706381	0.144723
Other	nsy-7	M00966_2.00	ADF	114	51	30.5963	1.66687	9.24035e-05	0.932164
Other	nsy-7	M00966_2.00	AFD	96	38	25.7653	1.47485	0.00599056	0.882042
Other	nsy-7	M00966_2.00	AIM	62	21	16.6401	1.26201	0.13803	0.814752
Other	nsy-7	M00966_2.00	AS	61	26	16.3717	1.58811	0.00727969	0.237521
Other	nsy-7	M00966_2.00	ASH	179	62	48.0416	1.29055	0.0152513	0.328477
Other	nsy-7	M00966_2.00	ASJ	147	49	39.4531	1.24198	0.0511107	0.186317
Other	nsy-7	M00966_2.00	AVA	86	43	23.0814	1.86297	1.84347e-05	0.169109
Other	nsy-7	M00966_2.00	AVD	66	29	17.7136	1.63716	0.00310663	0.157095
Other	nsy-7	M00966_2.00	AVE	64	32	17.1769	1.86297	0.000182211	0.272595
Other	nsy-7	M00966_2.00	AVG	60	27	16.1033	1.67667	0.00291218	0.497624
Other	nsy-7	M00966_2.00	AVH	35	14	9.3936	1.49038	0.0656259	0.51476
Other	nsy-7	M00966_2.00	AWA	85	29	22.813	1.2712	0.0872632	0.883321
Other	nsy-7	M00966_2.00	AWC	161	68	43.2106	1.57369	5.66908e-05	0.996547
Other	nsy-7	M00966_2.00	CAN	89	39	23.8866	1.63272	0.000819152	0.522672
Coordinated Regulator	nsy-7	M00966_2.00	CEP	69	30	18.5188	1.61997	0.00318523	0.0146526
Other	nsy-7	M00966_2.00	DA	78	35	20.9343	1.6719	0.00091139	0.266276
Other	nsy-7	M00966_2.00	DB	63	30	16.9085	1.77426	0.000696867	0.438252
Other	nsy-7	M00966_2.00	DD	55	25	14.7614	1.69361	0.00344065	0.849125
Other	nsy-7	M00966_2.00	DVA	75	35	20.1291	1.73877	0.000422704	0.666813
Other	nsy-7	M00966_2.00	I2	55	20	14.7614	1.35489	0.0807367	0.567464
Other	nsy-7	M00966_2.00	LUA	50	20	13.4194	1.49038	0.0325107	0.425165
Other	nsy-7	M00966_2.00	M4	52	21	13.9562	1.50471	0.0263647	0.655787
Other	nsy-7	M00966_2.00	OLL	78	25	20.9343	1.19421	0.182833	0.983212
Piecemeal Regulator	nsy-7	M00966_2.00	OLQ	75	26	20.1291	1.29166	0.0863925	0.0231498
Other	nsy-7	M00966_2.00	PDB	38	14	10.1988	1.37272	0.118481	0.516438
Other	nsy-7	M00966_2.00	PHA	163	52	43.7473	1.18864	0.0895486	0.365714
Other	nsy-7	M00966_2.00	PHB	160	53	42.9422	1.23422	0.0490722	0.571175
Coordinated Regulator	nsy-7	M00966_2.00	PQR	99	46	26.5705	1.73125	7.24983e-05	0.0174538
Other	nsy-7	M00966_2.00	PVC	80	37	21.4711	1.72325	0.000363511	0.134787
Other	nsy-7	M00966_2.00	PVP	51	21	13.6878	1.53421	0.0213315	0.425165
Other	nsy-7	M00966_2.00	RIB	55	22	14.7614	1.49038	0.0261393	0.996426
Other	nsy-7	M00966_2.00	RIG	58	23	15.5665	1.47753	0.025843	0.087399
Other	nsy-7	M00966_2.00	RIH	49	19	13.151	1.44475	0.0491657	0.124125
Other	nsy-7	M00966_2.00	RIR	34	10	9.12521	1.09587	0.431945	0.816022
Coordinated Regulator	nsy-7	M00966_2.00	RMD	71	34	19.0556	1.78425	0.000300367	0.0346769
Other	nsy-7	M00966_2.00	SAB	55	23	14.7614	1.55812	0.0138013	0.999573
Other	nsy-7	M00966_2.00	URY	47	21	12.6143	1.66478	0.00822953	0.340356
Other	nsy-7	M00966_2.00	VA	67	31	17.982	1.72394	0.000971242	0.174888
Other	nsy-7	M00966_2.00	VB	61	29	16.3717	1.77135	0.000855885	0.350189
Other	nsy-7	M00966_2.00	VC	59	23	15.8349	1.45249	0.0311014	0.210487
Other	nsy-7	M00966_2.00	VD	49	23	13.151	1.74891	0.00309556	0.521105
Other	ceh-34	M00672_2.00	I1	48	16	9.79875	1.63286	0.0281152	0.593558
Other	ceh-34	M00672_2.00	I2	55	19	11.2277	1.69224	0.012606	0.781272
Other	ceh-34	M00672_2.00	I3	46	13	9.39046	1.38438	0.132206	0.516438
Other	ceh-34	M00672_2.00	I4	42	15	8.5739	1.7495	0.0181879	0.753412
Other	ceh-34	M00672_2.00	I5	47	12	9.59461	1.2507	0.24139	0.742866
Other	ceh-34	M00672_2.00	I6	40	11	8.16562	1.34711	0.180882	0.737045
Other	ceh-34	M00672_2.00	M1	48	14	9.79875	1.42875	0.0991823	0.886672
Other	ceh-34	M00672_2.00	M2	43	15	8.77804	1.70881	0.0224474	0.297658
Other	ceh-34	M00672_2.00	M3	44	13	8.98218	1.44731	0.100851	0.537878
Other	ceh-34	M00672_2.00	M4	52	19	10.6153	1.78987	0.00699299	0.953494
Other	ceh-34	M00672_2.00	M5	50	15	10.207	1.46958	0.073646	0.226107
Other	ceh-34	M00672_2.00	MC	37	10	7.5532	1.32394	0.211327	0.0961564
Other	ceh-34	M00672_2.00	MI	40	12	8.16562	1.46958	0.102053	0.516527
Other	ceh-34	M00672_2.00	NSM	78	31	15.923	1.94687	0.000198766	0.61934
Coordinated Regulator	lin-39	M08211_2.00	AIY	108	77	44.9489	1.71305	2.00366e-08	1.80089e-05
Other	lin-39	M08211_2.00	AQR	70	43	29.1336	1.47596	0.00121057	0.0831377
Coordinated Regulator	lin-39	M08211_2.00	AS	61	42	25.3878	1.65434	5.47226e-05	0.00072746
Coordinated Regulator	lin-39	M08211_2.00	AVM	93	58	38.706	1.49847	0.000128304	1.64619e-05
Coordinated Regulator	lin-39	M08211_2.00	DA	78	58	32.4631	1.78664	1.06934e-07	3.36213e-06
Coordinated Regulator	lin-39	M08211_2.00	DB	63	46	26.2202	1.75437	3.27371e-06	0.0012421
Coordinated Regulator	lin-39	M08211_2.00	DD	55	41	22.8907	1.79112	4.99759e-06	0.00036155
Coordinated Regulator	lin-39	M08211_2.00	PDE	73	49	30.3822	1.61279	3.69325e-05	0.00100411
Coordinated Regulator	lin-39	M08211_2.00	PVD	97	63	40.3708	1.56053	1.48787e-05	0.000159184
Coordinated Regulator	lin-39	M08211_2.00	SDQ	63	44	26.2202	1.67809	2.35826e-05	8.09951e-05
Coordinated Regulator	lin-39	M08211_2.00	VA	67	47	27.885	1.68549	1.16841e-05	1.46963e-05
Coordinated Regulator	lin-39	M08211_2.00	VB	61	43	25.3878	1.69373	2.12132e-05	4.18963e-05
Coordinated Regulator	lin-39	M08211_2.00	VC	59	44	24.5554	1.79186	2.36341e-06	0.0239213
Coordinated Regulator	lin-39	M08211_2.00	VD	49	36	20.3935	1.76527	2.59579e-05	0.00299806
Other	ceh-32	M00483_2.00	ADL	190	41	30.3334	1.35164	0.0278081	0.985109
Other	ceh-32	M00483_2.00	I2	55	18	8.78073	2.04994	0.00256803	0.560832
Other	ceh-32	M00483_2.00	IL1	55	14	8.78073	1.5944	0.050342	0.956825
Coordinated Regulator	ceh-32	M00483_2.00	M1	48	13	7.66318	1.69642	0.0376718	0.0101826
Other	ceh-32	M00483_2.00	OLL	78	22	12.4527	1.76669	0.00595351	0.62985
Other	ceh-32	M00483_2.00	RIA	56	14	8.94038	1.56593	0.0571694	0.419782
Other	ceh-32	M00483_2.00	RIB	55	14	8.78073	1.5944	0.050342	0.334818
Other	ceh-32	M00483_2.00	RID	53	12	8.46143	1.4182	0.132017	0.380053
Other	ceh-32	M00483_2.00	RMD	71	18	11.3351	1.58798	0.0308225	0.3816
Other	ceh-32	M00483_2.00	RME	61	20	9.73863	2.05368	0.00156691	0.118523
Other	ceh-32	M00483_2.00	RMH	36	10	5.74739	1.73992	0.054237	0.587071
Coordinated Regulator	ceh-32	M00483_2.00	SMD	68	19	10.8562	1.75016	0.0107793	0.0415139
Other	ceh-32	M00483_2.00	URY	47	13	7.50353	1.73252	0.0323383	0.381175
Coordinated Regulator	ceh-54	M02188_2.00	AFD	96	59	37.0403	1.59286	2.09972e-05	0.000221743
Coordinated Regulator	ceh-54	M02188_2.00	ASE	169	102	65.2064	1.56426	1.6055e-07	0.000299905
Coordinated Regulator	ceh-54	M02188_2.00	ASG	101	60	38.9695	1.53967	6.07282e-05	0.000526413
Coordinated Regulator	ceh-54	M02188_2.00	ASH	179	104	69.0647	1.50583	9.2272e-07	0.00536679
Coordinated Regulator	ceh-54	M02188_2.00	AUA	62	43	23.9219	1.79752	5.78354e-06	0.00020924
Coordinated Regulator	ceh-54	M02188_2.00	AWA	85	53	32.7961	1.61605	3.12802e-05	0.0132695
Coordinated Regulator	ceh-54	M02188_2.00	AWC	161	99	62.1197	1.5937	8.75067e-08	8.59071e-07
Coordinated Regulator	ceh-54	M02188_2.00	BAG	87	57	33.5678	1.69806	2.66164e-06	0.000306279
Coordinated Regulator	ceh-54	M02188_2.00	I2	55	38	21.221	1.79068	1.99641e-05	0.00702143
Other	ceh-54	M02188_2.00	M3	44	28	16.9768	1.64931	0.00124455	0.0783244
Coordinated Regulator	ceh-13	M00450_2.00	AS	61	36	20.0692	1.79379	8.14138e-05	0.00418896
Coordinated Regulator	ceh-13	M00450_2.00	DA	78	47	25.6623	1.83148	4.5297e-06	0.00333048
Coordinated Regulator	ceh-13	M00450_2.00	DB	63	39	20.7272	1.88158	1.18259e-05	0.0366486
Coordinated Regulator	ceh-13	M00450_2.00	DD	55	33	18.0952	1.82369	0.000103259	0.0127293
Other	ceh-13	M00450_2.00	RMG	44	25	14.4762	1.72698	0.00161666	0.275127
Coordinated Regulator	ceh-13	M00450_2.00	VA	67	41	22.0432	1.85998	1.03464e-05	0.000668593
Coordinated Regulator	ceh-13	M00450_2.00	VB	61	38	20.0692	1.89345	1.2656e-05	0.00419853
Coordinated Regulator	ceh-13	M00450_2.00	VC	59	36	19.4112	1.8546	3.44385e-05	0.0296937
Coordinated Regulator	ceh-13	M00450_2.00	VD	49	29	16.1212	1.79888	0.000341626	0.00628358
Other	ceh-57	M00675_2.00	ADF	114	43	27.8334	1.54491	0.0018036	0.147162
Other	ceh-57	M00675_2.00	ADL	190	58	46.389	1.2503	0.0351709	0.560381
Other	ceh-57	M00675_2.00	ASG	101	35	24.6594	1.41934	0.0158407	0.84597
Other	ceh-57	M00675_2.00	ASI	254	68	62.0147	1.09651	0.211276	0.247452
Piecemeal Regulator	ceh-57	M00675_2.00	ASJ	147	41	35.8904	1.14237	0.189155	0.0304005
Other	ceh-57	M00675_2.00	ASK	171	51	41.7501	1.22155	0.0644379	0.267244
Coordinated Regulator	ceh-43	M00423_2.00	ADE	66	41	23.9839	1.70948	6.18563e-05	0.000102845
Coordinated Regulator	ceh-43	M00423_2.00	AIZ	54	38	19.6232	1.93649	2.98706e-06	0.000573248
Other	ceh-43	M00423_2.00	ASJ	147	80	53.4186	1.4976	2.42344e-05	0.0643769
Coordinated Regulator	ceh-43	M00423_2.00	BDU	68	45	24.7107	1.82108	3.97059e-06	0.00766797
Coordinated Regulator	ceh-43	M00423_2.00	CAN	89	59	32.3419	1.82426	1.72378e-07	1.70644e-06
Coordinated Regulator	ceh-43	M00423_2.00	CEP	69	47	25.0741	1.87445	8.61044e-07	2.18515e-05
Other	ceh-43	M00423_2.00	IL1	55	33	19.9866	1.65111	0.000642276	0.0600836
Coordinated Regulator	ceh-43	M00423_2.00	PDE	73	47	26.5276	1.77174	6.53803e-06	2.44668e-05
Coordinated Regulator	ceh-43	M00423_2.00	PVQ	83	54	30.1615	1.79036	9.84924e-07	0.0010617
Coordinated Regulator	ceh-43	M00423_2.00	SDQ	63	45	22.8937	1.96561	2.5214e-07	0.00214549
Other	ceh-43	M00423_2.00	URB	44	27	15.9893	1.68863	0.00119828	0.289811
Other	lim-4	M02182_2.00	AWB	119	62	41.775	1.48414	0.000269637	0.0747661
Other	lim-4	M02182_2.00	RID	53	26	18.6057	1.39742	0.0283146	0.0700541
Other	lim-4	M02182_2.00	RIV	54	32	18.9567	1.68806	0.000545863	0.0598356
Other	lim-4	M02182_2.00	RMF	37	23	12.9889	1.77075	0.00131393	0.0686032
Coordinated Regulator	lim-4	M02182_2.00	RMH	36	21	12.6378	1.66168	0.00519453	0.0451638
Coordinated Regulator	lim-4	M02182_2.00	SAA	47	31	16.4994	1.87886	5.57774e-05	0.00332065
Coordinated Regulator	lim-4	M02182_2.00	SIA	58	34	20.3609	1.66987	0.000483972	0.00609971
Coordinated Regulator	lim-4	M02182_2.00	SIB	48	29	16.8504	1.72103	0.000643319	0.00752238
Other	lim-4	M02182_2.00	SMB	40	26	14.042	1.85159	0.000288963	0.0716209
Coordinated Regulator	lim-4	M02182_2.00	SMD	68	44	23.8714	1.84321	4.43627e-06	0.000137532
Coordinated Regulator	egl-5	M09581_2.00	AWA	85	54	42.6015	1.26756	0.0108415	0.000179676
Coordinated Regulator	egl-5	M09581_2.00	DA	78	60	39.0932	1.5348	6.66594e-06	3.4634e-06
Coordinated Regulator	egl-5	M09581_2.00	DD	55	40	27.5657	1.45108	0.00103029	9.81797e-05
Coordinated Regulator	egl-5	M09581_2.00	DVB	46	34	23.0549	1.47474	0.00152639	0.0119392
Coordinated Regulator	egl-5	M09581_2.00	HSN	122	92	61.1457	1.5046	1.72378e-07	1.52846e-11
Coordinated Regulator	egl-5	M09581_2.00	LUA	50	35	25.0597	1.39666	0.00491359	1.43266e-05
Coordinated Regulator	egl-5	M09581_2.00	PDA	51	37	25.5609	1.44752	0.00161991	3.24204e-05
Coordinated Regulator	egl-5	M09581_2.00	PDB	38	26	19.0454	1.36516	0.020166	0.00459551
Coordinated Regulator	egl-5	M09581_2.00	PHB	160	102	80.1911	1.27196	0.000705742	0.00895725
Coordinated Regulator	egl-5	M09581_2.00	PLM	133	89	66.6589	1.33516	0.000177263	6.79057e-06
Coordinated Regulator	egl-5	M09581_2.00	PVC	80	59	40.0956	1.47148	4.89761e-05	1.03396e-06
Coordinated Regulator	egl-5	M09581_2.00	VA	67	50	33.58	1.48898	0.000109056	5.58473e-06
Coordinated Regulator	egl-5	M09581_2.00	VD	49	35	24.5585	1.42517	0.00307411	8.54878e-05
Coordinated Regulator	php-3	M00554_2.00	DVA	75	57	34.8985	1.63331	1.62394e-06	9.18066e-05
Coordinated Regulator	php-3	M00554_2.00	DVC	49	34	22.8003	1.49121	0.00174735	0.0220849
Coordinated Regulator	php-3	M00554_2.00	PHC	52	38	24.1963	1.57049	0.000245623	0.00879296
Other	php-3	M00554_2.00	PLN	51	33	23.731	1.39059	0.00875547	0.174339
Other	php-3	M00554_2.00	PVN	43	30	20.0085	1.49937	0.00275764	0.219499
Coordinated Regulator	php-3	M00554_2.00	PVR	54	37	25.1269	1.47253	0.00159139	0.00105047
Coordinated Regulator	php-3	M00554_2.00	PVW	40	27	18.6125	1.45064	0.00787186	0.0273385
Coordinated Regulator	nob-1	M01245_2.00	DVA	75	67	47.8762	1.39944	3.80435e-06	3.32917e-05
Coordinated Regulator	nob-1	M01245_2.00	PHC	52	46	33.1942	1.38578	0.000173462	0.00420971
Coordinated Regulator	nob-1	M01245_2.00	PLN	51	42	32.5558	1.29009	0.00458695	0.0250851
Other	nob-1	M01245_2.00	PVN	43	37	27.449	1.34795	0.0019052	0.0745513
Coordinated Regulator	nob-1	M01245_2.00	PVR	54	47	34.4709	1.36347	0.000323237	0.00793266
Other	nob-1	M01245_2.00	PVW	40	35	25.534	1.37072	0.00143067	0.213937
Coordinated Regulator	mab-5	M01240_2.00	AS	61	49	29.6621	1.65194	2.71278e-06	2.69449e-05
Coordinated Regulator	mab-5	M01240_2.00	AVL	41	34	19.9368	1.70539	2.48047e-05	0.00568243
Coordinated Regulator	mab-5	M01240_2.00	DA	78	62	37.9286	1.63465	2.88256e-07	0.00011613
Coordinated Regulator	mab-5	M01240_2.00	DB	63	52	30.6347	1.69742	3.55932e-07	7.59871e-05
Coordinated Regulator	mab-5	M01240_2.00	DD	55	45	26.7446	1.68259	2.98076e-06	0.0001934
Coordinated Regulator	mab-5	M01240_2.00	PQR	99	77	48.1402	1.5995	7.03676e-08	0.000297237
Coordinated Regulator	mab-5	M01240_2.00	PVM	84	60	40.8462	1.46892	6.19993e-05	1.39846e-05
Coordinated Regulator	mab-5	M01240_2.00	VA	67	54	32.5797	1.65747	7.52164e-07	0.000118433
Coordinated Regulator	mab-5	M01240_2.00	VB	61	51	29.6621	1.71936	2.48409e-07	3.74942e-05
Coordinated Regulator	mab-5	M01240_2.00	VC	59	47	28.6896	1.63822	5.99388e-06	5.36039e-05
Coordinated Regulator	mab-5	M01240_2.00	VD	49	41	23.827	1.72074	2.98076e-06	0.000225266
Coordinated Regulator	lim-6	M00432_2.00	ASE	169	77	44.3232	1.73724	5.23051e-07	0.00614303
Other	lim-6	M00432_2.00	AVL	41	21	10.753	1.95295	0.00105381	0.053674
Coordinated Regulator	lim-6	M00432_2.00	DVB	46	23	12.0643	1.90645	0.000940406	0.00455078
Other	lim-6	M00432_2.00	PVT	153	51	40.1269	1.27097	0.033139	0.083544
Other	lim-6	M00432_2.00	RIG	58	31	15.2115	2.03793	3.69325e-05	0.108163
Coordinated Regulator	lim-6	M00432_2.00	RIS	49	20	12.8511	1.55629	0.0212056	0.0429952
Coordinated Regulator	lim-6	M00432_2.00	RME	61	37	15.9983	2.31274	2.5214e-07	0.00932248
Coordinated Regulator	ceh-19	M02180_2.00	ADF	114	66	44.5867	1.48026	0.000111554	0.00846816
Coordinated Regulator	ceh-19	M02180_2.00	MC	37	26	14.4711	1.79668	0.000306568	0.03154
Other	ceh-19	M02180_2.00	PHA	163	90	63.7512	1.41174	7.22952e-05	0.16343
Coordinated Regulator	ceh-9	M03847_2.00	ADF	114	61	43.1798	1.4127	0.000953145	0.00404069
Other	ceh-9	M03847_2.00	ASJ	147	84	55.6792	1.50864	9.14134e-06	0.174888
Coordinated Regulator	ceh-9	M03847_2.00	AWB	119	61	45.0736	1.35334	0.00305173	0.00273544
Other	ceh-9	M03847_2.00	PQR	99	54	37.4982	1.44007	0.00103966	0.194072
Other	ceh-9	M03847_2.00	PVN	43	23	16.2871	1.41216	0.029798	0.161582
Coordinated Regulator	ceh-9	M03847_2.00	RIV	54	31	20.4536	1.51563	0.00404195	0.0499473
Other	ceh-9	M03847_2.00	SAA	47	27	17.8022	1.51667	0.00670144	0.0641779
Other	vab-7	M02186_2.00	ADA	47	35	22.3001	1.5695	0.000363511	0.0708988
Coordinated Regulator	vab-7	M02186_2.00	DB	63	49	29.8916	1.63926	5.34021e-06	0.00533643
Coordinated Regulator	vab-7	M02186_2.00	PHC	52	38	24.6724	1.54018	0.00037298	0.0409325
Other	vab-7	M02186_2.00	PVW	40	29	18.9788	1.52802	0.00193992	0.174648
Coordinated Regulator	vab-7	M02186_2.00	VC	59	49	27.9937	1.75039	2.58382e-07	0.000379364
Coordinated Regulator	ceh-37	M00674_2.00	ASG	101	49	26.6046	1.84179	8.58316e-06	0.0152701
Coordinated Regulator	ceh-37	M00674_2.00	AWA	85	43	22.39	1.9205	8.99027e-06	0.000543399
Coordinated Regulator	ceh-37	M00674_2.00	AWB	119	54	31.346	1.72271	2.45238e-05	0.0094763
Coordinated Regulator	ceh-37	M00674_2.00	BAG	87	52	22.9168	2.26907	3.60202e-09	0.000434865
Coordinated Regulator	ttx-3	M02085_2.00	AIA	53	23	13.1696	1.74645	0.00358263	0.00110712
Coordinated Regulator	ttx-3	M02085_2.00	AIN	50	29	12.4241	2.33417	4.38165e-06	8.28417e-05
Coordinated Regulator	ttx-3	M02085_2.00	AIY	108	55	26.8361	2.04948	1.10743e-07	3.4971e-05
Coordinated Regulator	ttx-3	M02085_2.00	ASI	254	96	63.1145	1.52105	1.49139e-05	2.97649e-05
Coordinated Regulator	ttx-3	M02085_2.00	ASK	171	77	42.4904	1.81217	1.49231e-07	0.000499028
Coordinated Regulator	ttx-3	M02085_2.00	NSM	78	43	19.3816	2.2186	1.93387e-07	0.00522635
Coordinated Regulator	vab-15	M00555_2.00	AVG	60	37	22.0394	1.67881	0.000205161	0.010723
Coordinated Regulator	vab-15	M00555_2.00	M5	50	32	18.3662	1.74233	0.000221186	0.000837427
Coordinated Regulator	vab-15	M00555_2.00	PVC	80	53	29.3859	1.80359	8.45191e-07	0.000673305
Coordinated Regulator	vab-15	M00555_2.00	PVQ	83	53	30.4879	1.7384	3.48197e-06	0.00124765
Other	vab-15	M00555_2.00	PVT	153	70	56.2005	1.24554	0.0159134	0.603824
Coordinated Regulator	ceh-10	M00287_2.00	AIY	108	78	41.3425	1.88668	1.5004e-10	0.000195191
Coordinated Regulator	ceh-10	M00287_2.00	CAN	89	57	34.0693	1.67306	5.00697e-06	0.0120732
Other	ceh-10	M00287_2.00	M1	48	28	18.3744	1.52386	0.00530446	0.0963983
Coordinated Regulator	ceh-10	M00287_2.00	RID	53	32	20.2884	1.57725	0.00159549	0.0239632
Other	unc-30	M01241_2.00	ASG	101	48	25.6948	1.86808	8.09266e-06	0.152429
Coordinated Regulator	unc-30	M01241_2.00	AVJ	40	21	10.1762	2.06364	0.000507288	0.0144602
Coordinated Regulator	unc-30	M01241_2.00	DD	55	30	13.9922	2.14405	1.84347e-05	0.0137392
Coordinated Regulator	unc-30	M01241_2.00	PVP	51	25	12.9746	1.92684	0.000537708	0.0403211
Coordinated Regulator	unc-30	M01241_2.00	VD	49	28	12.4658	2.24614	1.27473e-05	0.0161069
Coordinated Regulator	ttx-1	M00396_2.00	AFD	96	49	19.9701	2.45366	3.60202e-09	3.11606e-05
Coordinated Regulator	ttx-1	M00396_2.00	M2	43	24	8.94496	2.68308	3.68466e-06	0.0251341
Coordinated Regulator	ttx-1	M00396_2.00	RIB	55	30	11.4412	2.6221	4.82716e-07	0.00125827
Coordinated Regulator	ttx-1	M00396_2.00	RIP	36	16	7.4888	2.13652	0.00199628	0.0290485
Coordinated Regulator	ceh-16	M06491_2.00	AIZ	54	42	28.5264	1.47232	0.000332155	2.36812e-05
Coordinated Regulator	ceh-16	M06491_2.00	RIF	53	42	27.9982	1.5001	0.000171874	8.97305e-05
Coordinated Regulator	ceh-16	M06491_2.00	RIG	58	44	30.6395	1.43606	0.000567758	0.0102049
Other	ceh-2	M03814_2.00	I3	46	16	10.8693	1.47203	0.0615336	0.0515186
Coordinated Regulator	ceh-2	M03814_2.00	M3	44	18	10.3967	1.73131	0.0103151	0.0288846
Coordinated Regulator	ceh-2	M03814_2.00	NSM	78	32	18.4306	1.73625	0.000953145	6.91286e-05
Other	ceh-45	M02120_2.00	I1	48	18	9.98507	1.80269	0.00763962	0.210487
Other	ceh-45	M02120_2.00	MI	40	14	8.32089	1.68251	0.0297231	0.0574288
Coordinated Regulator	ceh-45	M02120_2.00	RIB	55	30	11.4412	2.6221	4.82716e-07	0.00989009
Other	ceh-12	M03871_2.00	VB	61	34	15.7858	2.15383	4.84836e-06	0.139556
Coordinated Regulator	dsc-1	M02063_2.00	AFD	96	43	23.711	1.81351	4.92187e-05	0.0273598
Coordinated Regulator	dsc-1	M02063_2.00	ASE	169	75	41.7412	1.79679	2.64232e-07	0.0037281
Coordinated Regulator	dsc-1	M02063_2.00	AWC	161	69	39.7653	1.73518	2.64238e-06	0.000572038
Coordinated Regulator	mls-2	M03233_2.00	AIM	62	44	26.2915	1.67354	2.19616e-05	0.0131476
Coordinated Regulator	mls-2	M03233_2.00	ASK	171	96	72.5137	1.32389	0.000451367	0.0226707
Coordinated Regulator	mls-2	M03233_2.00	AVJ	40	26	16.9623	1.53281	0.00470658	0.000767255
Coordinated Regulator	tab-1	M00516_2.00	AIB	54	30	14.9982	2.00024	5.57774e-05	0.0422096
Other	tab-1	M00516_2.00	AIN	50	27	13.8872	1.94423	0.000221672	0.0806
Coordinated Regulator	tab-1	M00516_2.00	AVD	66	36	18.3311	1.96387	1.92283e-05	0.0438078
Coordinated Regulator	ceh-8	M00426_2.00	AVE	64	39	19.3841	2.01196	2.98076e-06	0.000934752
Coordinated Regulator	ceh-8	M00426_2.00	RIA	56	28	16.9611	1.65084	0.00248206	0.00888342
Coordinated Regulator	ceh-53	M00679_2.00	I5	47	22	10.9255	2.01364	0.000698227	0.00651177
Coordinated Regulator	ceh-53	M00679_2.00	M4	52	22	12.0878	1.82002	0.00278297	0.0172417
Coordinated Regulator	ceh-36	M00673_2.00	ASE	169	88	39.2853	2.24002	2.09848e-13	9.77985e-05
Coordinated Regulator	ceh-36	M00673_2.00	ASI	254	82	59.0442	1.38879	0.00111761	0.0462006
Coordinated Regulator	ceh-36	M00673_2.00	AWA	85	40	19.7589	2.02441	7.56086e-06	0.00435022
Coordinated Regulator	ceh-36	M00673_2.00	AWC	161	82	37.4256	2.19101	6.53934e-12	0.00447166
Coordinated Regulator	ceh-90	M00677_2.00	ASI	254	136	114.208	1.19081	0.00500578	0.00762121
Coordinated Regulator	pha-2	M02184_2.00	I4	42	21	11.983	1.75249	0.00389457	0.0223052
Other	pal-1	M02183_2.00	PVT	153	93	78.0305	1.19184	0.0114462	0.102246
Other	ceh-1	M00557_2.00	AWA	85	48	24.3866	1.96829	8.42599e-07	0.163777
Coordinated Regulator	ceh-1	M00557_2.00	RIV	54	30	15.4927	1.9364	0.000100425	0.000621659
Other	ceh-7	M02154_2.00	I3	46	21	11.0868	1.89415	0.0019052	0.75651
Coordinated Regulator	gei-3	M00711_2.00	AFD	96	50	32.6259	1.53253	0.000448703	1.64424e-05
Coordinated Regulator	gei-3	M00711_2.00	AS	61	34	20.731	1.64005	0.000804213	0.000299905
Coordinated Regulator	gei-3	M00711_2.00	AWC	161	87	54.7163	1.59002	1.22711e-06	1.40825e-07
Coordinated Regulator	gei-3	M00711_2.00	BAG	87	47	29.5672	1.5896	0.00025131	3.05301e-06
Coordinated Regulator	gei-3	M00711_2.00	DA	78	49	26.5085	1.84846	1.62394e-06	0.000175319
Coordinated Regulator	gei-3	M00711_2.00	DB	63	37	21.4107	1.72811	0.000144012	0.000804345
Coordinated Regulator	gei-3	M00711_2.00	PLM	133	69	45.2004	1.52653	5.50104e-05	2.06725e-05
Coordinated Regulator	gei-3	M00711_2.00	PVC	80	45	27.1882	1.65513	0.000109056	8.95182e-06
Other	gei-3	M00711_2.00	PVW	40	20	13.5941	1.47123	0.0295039	0.147688
Coordinated Regulator	gei-3	M00711_2.00	SAB	55	29	18.6919	1.55147	0.00462509	0.000711295
Coordinated Regulator	egl-13	M00710_2.00	AFD	96	79	55.9928	1.41089	3.47197e-06	1.45567e-05
Coordinated Regulator	egl-13	M00710_2.00	AQR	70	59	40.8281	1.44508	1.45949e-05	0.00680126
Coordinated Regulator	egl-13	M00710_2.00	BAG	87	70	50.7435	1.37949	3.86427e-05	3.05941e-07
Coordinated Regulator	egl-13	M00710_2.00	PQR	99	78	57.7426	1.35082	4.9711e-05	0.000317904
Coordinated Regulator	egl-13	M00710_2.00	RIG	58	47	33.829	1.38934	0.000479794	0.0114018
Coordinated Regulator	egl-13	M00710_2.00	RMG	44	37	25.6634	1.44174	0.000529364	5.45452e-05
Coordinated Regulator	egl-13	M00710_2.00	URX	88	76	51.3268	1.48071	1.99158e-07	0.000379364
Other	sem-2	M02488_2.00	RMH	36	16	12.3261	1.29806	0.136274	0.0938436
Other	mbr-1	M00707_2.00	ADA	47	19	7.97133	2.38354	0.000303112	0.114271
Coordinated Regulator	mbr-1	M00707_2.00	AIM	62	21	10.5154	1.99708	0.00161714	0.0150365
Coordinated Regulator	mbr-1	M00707_2.00	AIN	50	26	8.48014	3.06599	2.5214e-07	0.000958815
Coordinated Regulator	mbr-1	M00707_2.00	AUA	62	25	10.5154	2.37747	4.23222e-05	0.0219729
Coordinated Regulator	mbr-1	M00707_2.00	BAG	87	31	14.7554	2.10092	7.03373e-05	0.0199426
Coordinated Regulator	mbr-1	M00707_2.00	DB	63	27	10.685	2.52691	7.54855e-06	0.00818599
Other	mbr-1	M00707_2.00	PDB	38	18	6.44491	2.7929	4.95108e-05	0.0563262
Other	mbr-1	M00707_2.00	PVP	51	26	8.64975	3.00587	3.61238e-07	0.149338
Coordinated Regulator	mbr-1	M00707_2.00	RIC	55	28	9.32816	3.00166	1.64202e-07	0.00105483
Other	mbr-1	M00707_2.00	RIP	36	17	6.1057	2.78428	8.24628e-05	0.328958
Coordinated Regulator	mbr-1	M00707_2.00	RIR	34	13	5.7665	2.2544	0.00376187	0.0162566
Coordinated Regulator	mbr-1	M00707_2.00	VB	61	23	10.3458	2.22313	0.00023359	0.002085
Coordinated Regulator	unc-3	OH2011_UNC-3	AS	61	32	12.407	2.57918	3.70415e-07	0.000279241
Coordinated Regulator	unc-3	OH2011_UNC-3	ASI	254	78	51.6621	1.50981	0.000159382	0.00594959
Coordinated Regulator	unc-3	OH2011_UNC-3	AVA	86	44	17.4919	2.51545	1.19974e-08	0.000434859
Coordinated Regulator	unc-3	OH2011_UNC-3	AVB	57	25	11.5935	2.15639	0.000144038	0.00792155
Coordinated Regulator	unc-3	OH2011_UNC-3	AVD	66	29	13.424	2.16031	4.54104e-05	0.00238772
Coordinated Regulator	unc-3	OH2011_UNC-3	AVE	64	30	13.0172	2.30464	9.5917e-06	0.00565251
Coordinated Regulator	unc-3	OH2011_UNC-3	AVF	41	16	8.33916	1.91866	0.006296	0.00126378
Coordinated Regulator	unc-3	OH2011_UNC-3	DA	78	38	15.8647	2.39525	2.88256e-07	0.000124092
Coordinated Regulator	unc-3	OH2011_UNC-3	DB	63	33	12.8138	2.57534	2.64232e-07	0.000487403
Coordinated Regulator	unc-3	OH2011_UNC-3	DVA	75	34	15.2546	2.22884	6.00249e-06	0.00689106
Coordinated Regulator	unc-3	OH2011_UNC-3	PDA	51	23	10.3731	2.21727	0.000164166	0.000246793
Coordinated Regulator	unc-3	OH2011_UNC-3	PDB	38	14	7.72897	1.81137	0.0164154	0.00615634
Coordinated Regulator	unc-3	OH2011_UNC-3	PHC	52	18	10.5765	1.70189	0.0140644	0.0313855
Coordinated Regulator	unc-3	OH2011_UNC-3	PVC	80	31	16.2715	1.90517	0.000299684	0.00242385
Coordinated Regulator	unc-3	OH2011_UNC-3	PVN	43	17	8.74594	1.94376	0.00441498	0.0196712
Coordinated Regulator	unc-3	OH2011_UNC-3	RIF	53	24	10.7799	2.22637	0.000111868	0.000140835
Coordinated Regulator	unc-3	OH2011_UNC-3	SAA	47	21	9.55952	2.19676	0.000345482	0.00140871
Coordinated Regulator	unc-3	OH2011_UNC-3	SAB	55	29	11.1867	2.59237	1.03763e-06	8.54878e-05
Coordinated Regulator	unc-3	OH2011_UNC-3	VA	67	36	13.6274	2.64174	5.14205e-08	0.000318416
Coordinated Regulator	unc-3	OH2011_UNC-3	VB	61	34	12.407	2.74038	4.33371e-08	6.29017e-05
Coordinated Regulator	mef-2	M02745_2.00	ASH	179	135	105.757	1.27651	1.5558e-05	0.0451638
Other	mef-2	M02745_2.00	AWB	119	91	70.308	1.29431	0.000143333	0.0602593
Other	mef-2	M02745_2.00	PVR	54	43	31.9044	1.34777	0.00193992	0.448682
Other	mef-2	M02745_2.00	PVW	40	28	23.6329	1.18479	0.108531	0.900765
Other	mef-2	M02745_2.00	RIC	55	43	32.4953	1.32327	0.00343727	0.0625532
Coordinated Regulator	mef-2	M02745_2.00	RIG	58	43	34.2677	1.25482	0.0147498	0.0243259
Coordinated Regulator	npax-1	M02427_2.00	ASG	101	51	39.3817	1.29502	0.0146466	0.000447003
Coordinated Regulator	tbx-2	M00830_2.00	ADE	66	42	21.954	1.91309	3.249e-06	3.30335e-06
Coordinated Regulator	tbx-2	M00830_2.00	ASJ	147	62	48.8976	1.26796	0.0171347	0.00452986
Coordinated Regulator	tbx-2	M00830_2.00	AVA	86	54	28.6067	1.88767	2.88256e-07	4.33026e-08
Coordinated Regulator	tbx-2	M00830_2.00	AVD	66	43	21.954	1.95864	1.12598e-06	3.2187e-05
Coordinated Regulator	tbx-2	M00830_2.00	AVH	35	22	11.6423	1.88966	0.000676626	0.000866563
Coordinated Regulator	tbx-2	M00830_2.00	AWB	119	55	39.5838	1.38946	0.00334587	0.000592478
Coordinated Regulator	tbx-2	M00830_2.00	AWC	161	75	53.5545	1.40044	0.000632091	0.000110031
Coordinated Regulator	tbx-2	M00830_2.00	I1	48	26	15.9666	1.6284	0.00342764	0.0024256
Coordinated Regulator	tbx-2	M00830_2.00	I3	46	26	15.3013	1.6992	0.00170019	0.00385589
Other	tbx-2	M00830_2.00	I4	42	25	13.9707	1.78945	0.000855708	0.121549
Coordinated Regulator	tbx-2	M00830_2.00	I5	47	26	15.6339	1.66305	0.00242234	0.0390753
Coordinated Regulator	tbx-2	M00830_2.00	I6	40	22	13.3055	1.65346	0.00527007	0.0219281
Coordinated Regulator	tbx-2	M00830_2.00	IL2	62	33	20.6235	1.60012	0.00161714	0.00199711
Coordinated Regulator	tbx-2	M00830_2.00	LUA	50	30	16.6318	1.80377	0.000250788	0.00106322
Coordinated Regulator	tbx-2	M00830_2.00	M1	48	24	15.9666	1.50314	0.014426	0.00702143
Coordinated Regulator	tbx-2	M00830_2.00	M2	43	25	14.3034	1.74784	0.0012902	0.00809196
Coordinated Regulator	tbx-2	M00830_2.00	M3	44	27	14.636	1.84476	0.000309264	0.00404069
Coordinated Regulator	tbx-2	M00830_2.00	M5	50	29	16.6318	1.74364	0.000609718	0.0118912
Coordinated Regulator	tbx-2	M00830_2.00	MC	37	21	12.3076	1.70627	0.00404741	0.0201617
Coordinated Regulator	tbx-2	M00830_2.00	NSM	78	51	25.9457	1.96565	1.46932e-07	3.74942e-05
Coordinated Regulator	tbx-2	M00830_2.00	OLL	78	45	25.9457	1.73439	3.22141e-05	0.00241605
Coordinated Regulator	tbx-2	M00830_2.00	PDE	73	42	24.2825	1.72964	6.01033e-05	7.71086e-05
Coordinated Regulator	tbx-2	M00830_2.00	PHA	163	75	54.2198	1.38326	0.000925579	0.000566448
Other	tbx-2	M00830_2.00	PLN	51	28	16.9645	1.65051	0.00197557	0.189256
Coordinated Regulator	tbx-2	M00830_2.00	PVR	54	34	17.9624	1.89285	3.08162e-05	0.0311126
Other	tbx-2	M00830_2.00	PVW	40	22	13.3055	1.65346	0.00527007	0.115064
Coordinated Regulator	tbx-2	M00830_2.00	RID	53	29	17.6297	1.64495	0.00178195	0.008422
Coordinated Regulator	tbx-2	M00830_2.00	RMG	44	31	14.636	2.11806	3.68927e-06	0.0113618
Coordinated Regulator	tbx-2	M00830_2.00	SMD	68	46	22.6193	2.03366	1.53542e-07	0.000168172
Coordinated Regulator	egl-44	M09438_2.00	ADL	190	87	69.262	1.2561	0.0066549	0.0100671
Other	egl-44	M09438_2.00	AS	61	36	22.2367	1.61894	0.000598821	0.318875
Coordinated Regulator	egl-44	M09438_2.00	FLP	72	39	26.2466	1.4859	0.00256228	0.0229718
Coordinated Regulator	egl-44	M09438_2.00	HSN	122	73	44.4735	1.64143	1.17927e-06	3.2241e-06
Other	egl-44	M09438_2.00	SAB	55	29	20.0495	1.44642	0.0121489	0.274735
Piecemeal Regulator	fkh-9	M00663_2.00	DVB	46	38	35.5382	1.06927	0.252456	1.49733e-05
Piecemeal Regulator	fkh-9	M00663_2.00	I3	46	38	35.5382	1.06927	0.252456	0.00765517
Piecemeal Regulator	fkh-9	M00663_2.00	PVN	43	35	33.2205	1.05357	0.332053	0.00444915
Other	fkh-8	M03026_2.00	ADF	114	54	37.5802	1.43693	0.00165933	0.0877256
Other	fkh-8	M03026_2.00	ADL	190	82	62.6336	1.3092	0.00313433	0.13252
Coordinated Regulator	fkh-8	M03026_2.00	ASE	169	93	55.711	1.66933	7.55456e-08	0.000771137
Coordinated Regulator	fkh-8	M03026_2.00	ASG	101	62	33.2947	1.86216	1.06934e-07	0.00522635
Coordinated Regulator	fkh-8	M03026_2.00	ASH	179	83	59.0075	1.4066	0.000314593	0.0116472
Coordinated Regulator	fkh-8	M03026_2.00	ASI	254	107	83.7313	1.2779	0.00217468	0.0239213
Other	fkh-8	M03026_2.00	ASJ	147	72	48.4586	1.4858	0.000119502	0.215227
Coordinated Regulator	fkh-8	M03026_2.00	IL2	62	31	20.4383	1.51676	0.0055435	0.0118996
Coordinated Regulator	fkh-8	M03026_2.00	PDE	73	40	24.0645	1.6622	0.000257456	0.0258356
Coordinated Regulator	fkh-8	M03026_2.00	URX	88	55	29.0093	1.89595	2.18856e-07	0.00161849
Coordinated Regulator	pha-4	M08123_2.00	AVG	60	42	29.2744	1.4347	0.00130119	1.4228e-05
Coordinated Regulator	pha-4	M08123_2.00	AVL	41	28	20.0042	1.39971	0.0113561	0.000381644
Coordinated Regulator	pha-4	M08123_2.00	DVB	46	33	22.4437	1.47034	0.00218808	0.000397275
Coordinated Regulator	pha-4	M08123_2.00	I1	48	34	23.4195	1.45178	0.00257951	0.00234303
Coordinated Regulator	pha-4	M08123_2.00	M4	52	36	25.3712	1.41893	0.00343907	0.00027893
Coordinated Regulator	pha-4	M08123_2.00	NSM	78	56	38.0567	1.47149	9.6614e-05	2.26655e-07
Piecemeal Regulator	pha-4	M08123_2.00	PVT	153	84	74.6497	1.12525	0.0787475	0.0101826
Other	fkh-10	M03750_2.00	RMH	36	15	8.39713	1.78632	0.0134551	0.671384
Other	fkh-10	M03750_2.00	SMD	68	36	15.8613	2.26968	1.13612e-06	0.536479
Coordinated Regulator	lin-31	M00665_2.00	ADA	47	37	27.8903	1.32663	0.00564888	0.00411754
Coordinated Regulator	lin-31	M00665_2.00	AVD	66	54	39.1651	1.37878	0.000221672	0.00150329
Coordinated Regulator	lin-31	M00665_2.00	PVC	80	63	47.4729	1.32707	0.0004406	0.000526413
Coordinated Regulator	lin-31	M00665_2.00	PVP	51	42	30.264	1.38779	0.000797197	0.00205226
Coordinated Regulator	lin-31	M00665_2.00	PVR	54	45	32.0442	1.40431	0.000340907	0.000395783
Coordinated Regulator	fkh-2	M01974_2.00	AWB	119	72	53.9154	1.33543	0.00112936	0.000105853
Coordinated Regulator	daf-16	M01989_2.00	AIM	62	38	23.638	1.60758	0.000426895	0.00142101
Coordinated Regulator	daf-16	M01989_2.00	ASE	169	102	64.4326	1.58305	9.75013e-08	4.44985e-05
Coordinated Regulator	daf-16	M01989_2.00	ASK	171	85	65.1951	1.30378	0.00212587	0.00742492
Other	daf-16	M01989_2.00	AVF	41	26	15.6316	1.6633	0.00159139	0.091599
Coordinated Regulator	daf-16	M01989_2.00	AWC	161	99	61.3826	1.61284	5.01356e-08	4.81964e-05
Coordinated Regulator	daf-16	M01989_2.00	BAG	87	54	33.1695	1.628	2.23054e-05	9.82195e-05
Coordinated Regulator	daf-16	M01989_2.00	DA	78	53	29.7381	1.78222	9.2272e-07	0.000775541
Coordinated Regulator	daf-16	M01989_2.00	DB	63	45	24.0193	1.8735	8.82153e-07	0.0194082
Coordinated Regulator	daf-16	M01989_2.00	MC	37	23	14.1065	1.63045	0.0038319	0.0429001
Coordinated Regulator	daf-16	M01989_2.00	PVC	80	51	30.5006	1.6721	1.5046e-05	0.00338691
Other	daf-16	M01989_2.00	PVT	153	67	58.3325	1.14859	0.0903939	0.12755
Other	daf-16	M01989_2.00	RIG	58	36	22.113	1.628	0.000434492	0.078298
Coordinated Regulator	hsf-1	M00682_2.00	ALM	125	94	73.7098	1.27527	0.000270129	2.29575e-05
Coordinated Regulator	hsf-1	M00682_2.00	AVM	93	72	54.8401	1.31291	0.000337747	6.91091e-05
Coordinated Regulator	hsf-1	M00682_2.00	PLM	133	99	78.4272	1.26232	0.000332956	4.23052e-06
Coordinated Regulator	hsf-1	M00682_2.00	PVM	84	66	49.533	1.33245	0.000297433	0.000304672
Coordinated Regulator	daf-19	M00709_2.00	ADE	66	24	13.3025	1.80418	0.00261257	0.0019762
Coordinated Regulator	daf-19	M00709_2.00	AFD	96	44	19.3491	2.27401	2.16076e-07	0.00260655
Coordinated Regulator	daf-19	M00709_2.00	AQR	70	23	14.1087	1.6302	0.0107422	0.0029898
Coordinated Regulator	daf-19	M00709_2.00	ASE	169	70	34.0624	2.05505	1.19974e-08	0.000114885
Coordinated Regulator	daf-19	M00709_2.00	AWB	119	47	23.9848	1.95958	6.24444e-06	0.0250942
Coordinated Regulator	daf-19	M00709_2.00	AWC	161	68	32.45	2.09553	8.31474e-09	0.00333889
Coordinated Regulator	daf-19	M00709_2.00	CEP	69	25	13.9071	1.79764	0.0022956	0.00299527
Other	daf-19	M00709_2.00	IL2	62	26	12.4963	2.08062	0.000206639	0.0737554
Coordinated Regulator	daf-19	M00709_2.00	PDE	73	29	14.7133	1.971	0.000256775	0.0160501
Other	daf-19	M00709_2.00	URX	88	24	17.7366	1.35313	0.0693584	0.0790404
Other	dpl-1	M09525_2.00	AFD	96	31	20.9256	1.48144	0.0134902	0.658137
Other	ztf-3	M00640_2.00	ADA	47	29	15.7041	1.84665	0.00018232	0.194798
Coordinated Regulator	ztf-3	M00640_2.00	ADE	66	42	22.0526	1.90454	3.59356e-06	0.00158103
Coordinated Regulator	ztf-3	M00640_2.00	ADF	114	60	38.0908	1.57518	6.07282e-05	3.52232e-05
Piecemeal Regulator	ztf-3	M00640_2.00	ADL	190	73	63.4846	1.14988	0.0863925	0.000866498
Coordinated Regulator	ztf-3	M00640_2.00	AFD	96	53	32.0764	1.6523	3.58603e-05	5.26222e-05
Coordinated Regulator	ztf-3	M00640_2.00	AIA	53	34	17.7089	1.91994	2.05829e-05	0.00283219
Coordinated Regulator	ztf-3	M00640_2.00	AIB	54	33	18.043	1.82896	8.98248e-05	0.000502756
Coordinated Regulator	ztf-3	M00640_2.00	AIM	62	35	20.716	1.68951	0.000383051	0.00893004
Coordinated Regulator	ztf-3	M00640_2.00	AIN	50	31	16.7065	1.85557	0.000101609	0.0017471
Coordinated Regulator	ztf-3	M00640_2.00	AIY	108	70	36.086	1.93981	2.17475e-09	1.07159e-06
Coordinated Regulator	ztf-3	M00640_2.00	AIZ	54	33	18.043	1.82896	8.98248e-05	4.2873e-05
Coordinated Regulator	ztf-3	M00640_2.00	ALA	55	30	18.3771	1.63246	0.00171872	0.00194199
Coordinated Regulator	ztf-3	M00640_2.00	ALM	125	76	41.7662	1.81965	1.69313e-08	2.06725e-05
Coordinated Regulator	ztf-3	M00640_2.00	ALN	64	41	21.3843	1.9173	3.72909e-06	0.000105117
Coordinated Regulator	ztf-3	M00640_2.00	AQR	70	38	23.3891	1.62469	0.000563059	0.00423348
Coordinated Regulator	ztf-3	M00640_2.00	AS	61	37	20.3819	1.81534	4.40448e-05	4.41343e-05
Coordinated Regulator	ztf-3	M00640_2.00	ASE	169	91	56.4679	1.61154	4.39003e-07	0.00136556
Coordinated Regulator	ztf-3	M00640_2.00	ASG	101	51	33.7471	1.51124	0.000610787	0.000208914
Coordinated Regulator	ztf-3	M00640_2.00	ASH	179	80	59.8092	1.33759	0.0018036	0.000126275
Piecemeal Regulator	ztf-3	M00640_2.00	ASI	254	95	84.8689	1.11937	0.102555	0.00150329
Piecemeal Regulator	ztf-3	M00640_2.00	ASJ	147	58	49.117	1.18085	0.0752983	9.28128e-06
Coordinated Regulator	ztf-3	M00640_2.00	ASK	171	71	57.1362	1.24265	0.0185481	4.59431e-05
Coordinated Regulator	ztf-3	M00640_2.00	AUA	62	42	20.716	2.02742	4.39705e-07	2.65768e-05
Coordinated Regulator	ztf-3	M00640_2.00	AVA	86	56	28.7351	1.94883	5.5006e-08	3.25529e-06
Coordinated Regulator	ztf-3	M00640_2.00	AVB	57	37	19.0454	1.94273	7.0464e-06	0.000140502
Coordinated Regulator	ztf-3	M00640_2.00	AVD	66	44	22.0526	1.99523	4.39003e-07	1.79587e-05
Coordinated Regulator	ztf-3	M00640_2.00	AVE	64	44	21.3843	2.05758	1.64202e-07	6.61337e-05
Coordinated Regulator	ztf-3	M00640_2.00	AVF	41	24	13.6993	1.75191	0.00149448	0.0146911
Coordinated Regulator	ztf-3	M00640_2.00	AVG	60	37	20.0478	1.84559	2.83784e-05	4.07532e-05
Coordinated Regulator	ztf-3	M00640_2.00	AVH	35	22	11.6945	1.88122	0.000712299	0.000771137
Coordinated Regulator	ztf-3	M00640_2.00	AVJ	40	23	13.3652	1.72089	0.00239246	0.00215779
Coordinated Regulator	ztf-3	M00640_2.00	AVK	47	28	15.7041	1.78297	0.000473151	0.0329254
Coordinated Regulator	ztf-3	M00640_2.00	AVL	41	22	13.6993	1.60592	0.00774986	0.00435845
Coordinated Regulator	ztf-3	M00640_2.00	AVM	93	54	31.0741	1.73778	5.93688e-06	4.04603e-06
Coordinated Regulator	ztf-3	M00640_2.00	AWA	85	42	28.401	1.47882	0.00257951	0.000435218
Coordinated Regulator	ztf-3	M00640_2.00	AWB	119	55	39.7614	1.38325	0.00366242	0.00048526
Coordinated Regulator	ztf-3	M00640_2.00	AWC	161	82	53.7949	1.52431	1.56913e-05	5.26222e-05
Coordinated Regulator	ztf-3	M00640_2.00	BAG	87	53	29.0693	1.82323	1.2606e-06	0.000902776
Coordinated Regulator	ztf-3	M00640_2.00	BDU	68	46	22.7208	2.02458	1.64656e-07	0.00330549
Coordinated Regulator	ztf-3	M00640_2.00	CAN	89	58	29.7375	1.9504	3.76854e-08	2.6159e-07
Coordinated Regulator	ztf-3	M00640_2.00	CEP	69	42	23.0549	1.82174	1.39805e-05	0.000429832
Coordinated Regulator	ztf-3	M00640_2.00	DA	78	51	26.0621	1.95686	1.6055e-07	0.000172707
Coordinated Regulator	ztf-3	M00640_2.00	DB	63	42	21.0502	1.99523	7.65227e-07	0.00115421
Coordinated Regulator	ztf-3	M00640_2.00	DD	55	35	18.3771	1.90454	1.96685e-05	0.000904302
Coordinated Regulator	ztf-3	M00640_2.00	DVA	75	47	25.0597	1.87552	1.76163e-06	0.000390859
Coordinated Regulator	ztf-3	M00640_2.00	DVB	46	30	15.37	1.95186	3.91635e-05	0.00072746
Coordinated Regulator	ztf-3	M00640_2.00	DVC	49	28	16.3723	1.7102	0.00104351	0.0101367
Coordinated Regulator	ztf-3	M00640_2.00	FLP	72	43	24.0573	1.7874	1.92954e-05	0.00240994
Coordinated Regulator	ztf-3	M00640_2.00	HSN	122	78	40.7638	1.91346	8.24347e-10	3.79457e-10
Coordinated Regulator	ztf-3	M00640_2.00	I1	48	30	16.0382	1.87053	0.000106779	0.00139837
Coordinated Regulator	ztf-3	M00640_2.00	I2	55	32	18.3771	1.74129	0.000343124	0.00615634
Coordinated Regulator	ztf-3	M00640_2.00	I3	46	25	15.37	1.62655	0.00403146	0.00420746
Coordinated Regulator	ztf-3	M00640_2.00	I4	42	23	14.0334	1.63894	0.00500693	0.0187435
Coordinated Regulator	ztf-3	M00640_2.00	I5	47	23	15.7041	1.46459	0.0225922	0.00225265
Other	ztf-3	M00640_2.00	I6	40	23	13.3652	1.72089	0.00239246	0.192927
Coordinated Regulator	ztf-3	M00640_2.00	IL1	55	30	18.3771	1.63246	0.00171872	0.008422
Coordinated Regulator	ztf-3	M00640_2.00	IL2	62	36	20.716	1.73778	0.000164496	0.00606364
Coordinated Regulator	ztf-3	M00640_2.00	LUA	50	30	16.7065	1.79571	0.000270542	0.00132345
Coordinated Regulator	ztf-3	M00640_2.00	M1	48	26	16.0382	1.62113	0.00362429	0.00214549
Coordinated Regulator	ztf-3	M00640_2.00	M2	43	28	14.3676	1.94883	7.04416e-05	0.00201683
Coordinated Regulator	ztf-3	M00640_2.00	M3	44	26	14.7017	1.7685	0.000843858	0.0100386
Coordinated Regulator	ztf-3	M00640_2.00	M4	52	32	17.3747	1.84175	9.55349e-05	0.000345724
Coordinated Regulator	ztf-3	M00640_2.00	M5	50	32	16.7065	1.91542	3.67485e-05	0.00455641
Coordinated Regulator	ztf-3	M00640_2.00	MC	37	22	12.3628	1.77953	0.00174636	0.0187435
Other	ztf-3	M00640_2.00	MI	40	21	13.3652	1.57125	0.0120675	0.054075
Coordinated Regulator	ztf-3	M00640_2.00	NSM	78	51	26.0621	1.95686	1.6055e-07	0.000284846
Coordinated Regulator	ztf-3	M00640_2.00	OLL	78	41	26.0621	1.57317	0.000766085	0.00324504
Coordinated Regulator	ztf-3	M00640_2.00	OLQ	75	41	25.0597	1.63609	0.000306274	0.00106801
Coordinated Regulator	ztf-3	M00640_2.00	PDA	51	33	17.0406	1.93655	2.12587e-05	0.000891466
Coordinated Regulator	ztf-3	M00640_2.00	PDB	38	22	12.6969	1.7327	0.00263499	0.00205756
Coordinated Regulator	ztf-3	M00640_2.00	PDE	73	48	24.3915	1.9679	2.57446e-07	0.00035174
Coordinated Regulator	ztf-3	M00640_2.00	PHA	163	68	54.4631	1.24855	0.0186571	0.00608767
Coordinated Regulator	ztf-3	M00640_2.00	PHB	160	72	53.4607	1.34678	0.00236392	0.00200407
Coordinated Regulator	ztf-3	M00640_2.00	PHC	52	32	17.3747	1.84175	9.55349e-05	0.0229718
Coordinated Regulator	ztf-3	M00640_2.00	PLM	133	83	44.4392	1.86772	9.71176e-10	7.59871e-05
Coordinated Regulator	ztf-3	M00640_2.00	PLN	51	28	17.0406	1.64313	0.00211495	0.00511088
Coordinated Regulator	ztf-3	M00640_2.00	PQR	99	57	33.0788	1.72316	4.7219e-06	7.5347e-05
Coordinated Regulator	ztf-3	M00640_2.00	PVC	80	53	26.7304	1.98276	5.81295e-08	3.12651e-05
Coordinated Regulator	ztf-3	M00640_2.00	PVD	97	56	32.4106	1.72783	5.00697e-06	1.40579e-05
Coordinated Regulator	ztf-3	M00640_2.00	PVM	84	48	28.0669	1.7102	2.78684e-05	0.000232953
Coordinated Regulator	ztf-3	M00640_2.00	PVN	43	25	14.3676	1.74003	0.0013694	0.00899372
Coordinated Regulator	ztf-3	M00640_2.00	PVP	51	32	17.0406	1.87787	5.88623e-05	0.000386888
Coordinated Regulator	ztf-3	M00640_2.00	PVQ	83	48	27.7328	1.73081	1.93539e-05	8.06423e-05
Coordinated Regulator	ztf-3	M00640_2.00	PVR	54	30	18.043	1.66269	0.00124476	0.00522635
Piecemeal Regulator	ztf-3	M00640_2.00	PVT	153	57	51.1218	1.11498	0.180299	0.00458216
Other	ztf-3	M00640_2.00	PVW	40	19	13.3652	1.4216	0.0484394	0.0505214
Coordinated Regulator	ztf-3	M00640_2.00	RIA	56	28	18.7113	1.49643	0.00954845	0.00100411
Coordinated Regulator	ztf-3	M00640_2.00	RIB	55	32	18.3771	1.74129	0.000343124	0.00123694
Coordinated Regulator	ztf-3	M00640_2.00	RIC	55	35	18.3771	1.90454	1.96685e-05	0.00366071
Coordinated Regulator	ztf-3	M00640_2.00	RID	53	26	17.7089	1.46819	0.0156174	0.0103536
Coordinated Regulator	ztf-3	M00640_2.00	RIF	53	32	17.7089	1.807	0.00014986	0.00034742
Coordinated Regulator	ztf-3	M00640_2.00	RIG	58	33	19.3795	1.70283	0.000458802	9.83273e-05
Coordinated Regulator	ztf-3	M00640_2.00	RIH	49	30	16.3723	1.83236	0.000171492	0.0311393
Coordinated Regulator	ztf-3	M00640_2.00	RIM	64	38	21.3843	1.77701	6.18563e-05	0.00512415
Coordinated Regulator	ztf-3	M00640_2.00	RIP	36	20	12.0287	1.66269	0.0068281	0.0118661
Coordinated Regulator	ztf-3	M00640_2.00	RIR	34	21	11.3604	1.84853	0.0012275	0.00567299
Coordinated Regulator	ztf-3	M00640_2.00	RIS	49	27	16.3723	1.64912	0.00233036	0.000217338
Coordinated Regulator	ztf-3	M00640_2.00	RIV	54	33	18.043	1.82896	8.98248e-05	0.000186887
Coordinated Regulator	ztf-3	M00640_2.00	RMD	71	47	23.7232	1.98118	2.58382e-07	3.18064e-05
Coordinated Regulator	ztf-3	M00640_2.00	RME	61	38	20.3819	1.8644	1.74098e-05	0.000110031
Coordinated Regulator	ztf-3	M00640_2.00	RMF	37	21	12.3628	1.69865	0.00427806	0.000723733
Coordinated Regulator	ztf-3	M00640_2.00	RMG	44	25	14.7017	1.70048	0.00198728	0.00950296
Coordinated Regulator	ztf-3	M00640_2.00	RMH	36	19	12.0287	1.57956	0.0152881	0.0111852
Coordinated Regulator	ztf-3	M00640_2.00	SAA	47	29	15.7041	1.84665	0.00018232	0.00524435
Coordinated Regulator	ztf-3	M00640_2.00	SAB	55	33	18.3771	1.79571	0.000138936	0.000131381
Coordinated Regulator	ztf-3	M00640_2.00	SDQ	63	42	21.0502	1.99523	7.65227e-07	7.41976e-05
Coordinated Regulator	ztf-3	M00640_2.00	SIA	58	37	19.3795	1.90923	1.15747e-05	0.000178907
Coordinated Regulator	ztf-3	M00640_2.00	SIB	48	28	16.0382	1.74583	0.000712299	0.0009882
Coordinated Regulator	ztf-3	M00640_2.00	SMB	40	25	13.3652	1.87053	0.000373735	0.00232133
Coordinated Regulator	ztf-3	M00640_2.00	SMD	68	43	22.7208	1.89254	3.47197e-06	2.18515e-05
Coordinated Regulator	ztf-3	M00640_2.00	URA	46	27	15.37	1.75667	0.000774548	0.0159876
Other	ztf-3	M00640_2.00	URB	44	25	14.7017	1.70048	0.00198728	0.0921525
Coordinated Regulator	ztf-3	M00640_2.00	URX	88	52	29.4034	1.7685	4.75698e-06	0.000640347
Coordinated Regulator	ztf-3	M00640_2.00	URY	47	27	15.7041	1.7193	0.00114458	0.00418429
Coordinated Regulator	ztf-3	M00640_2.00	VA	67	43	22.3867	1.92078	2.14979e-06	0.000177865
Coordinated Regulator	ztf-3	M00640_2.00	VB	61	40	20.3819	1.96253	2.36341e-06	0.000640347
Coordinated Regulator	ztf-3	M00640_2.00	VC	59	37	19.7136	1.87687	1.82735e-05	1.04015e-05
Coordinated Regulator	ztf-3	M00640_2.00	VD	49	32	16.3723	1.95451	2.19616e-05	0.000125034
Coordinated Regulator	ztf-6	M00631_2.00	DB	63	47	36.6481	1.28247	0.00665276	9.17998e-05
Coordinated Regulator	ztf-6	M00631_2.00	VB	61	46	35.4847	1.29633	0.00530644	8.75788e-05
Other	ham-2	M00612_2.00	HSN	122	49	25.5487	1.9179	6.55991e-06	0.378235
Coordinated Regulator	lsy-27	M00624_2.00	ASE	169	95	60.0339	1.58244	3.97045e-07	0.000186887
Coordinated Regulator	sptf-3	M00632_2.00	M4	52	27	14.5876	1.85088	0.000524269	0.00241148
Other	ztf-9	M00636_2.00	ADA	47	23	12.4856	1.84212	0.00151342	0.100942
Coordinated Regulator	ztf-9	M00636_2.00	ADE	66	32	17.533	1.82513	0.000289261	0.00262547
Coordinated Regulator	ztf-9	M00636_2.00	ADF	114	49	30.2843	1.618	0.000277208	0.0360312
Other	ztf-9	M00636_2.00	ADL	190	65	50.4738	1.2878	0.0141183	0.168128
Coordinated Regulator	ztf-9	M00636_2.00	AFD	96	46	25.5025	1.80374	2.52042e-05	0.0132695
Coordinated Regulator	ztf-9	M00636_2.00	AIA	53	27	14.0795	1.91768	0.000328193	1.74604e-05
Coordinated Regulator	ztf-9	M00636_2.00	AIB	54	29	14.3452	2.02159	7.04416e-05	0.000229344
Coordinated Regulator	ztf-9	M00636_2.00	AIM	62	25	16.4704	1.51788	0.0151478	0.00124108
Coordinated Regulator	ztf-9	M00636_2.00	AIN	50	27	13.2826	2.03274	0.000107885	0.00149794
Coordinated Regulator	ztf-9	M00636_2.00	AIY	108	53	28.6904	1.84731	3.4807e-06	1.84856e-06
Coordinated Regulator	ztf-9	M00636_2.00	AIZ	54	25	14.3452	1.74275	0.00230764	0.000488019
Coordinated Regulator	ztf-9	M00636_2.00	ALA	55	25	14.6108	1.71106	0.00304087	0.0109784
Coordinated Regulator	ztf-9	M00636_2.00	ALM	125	56	33.2064	1.68642	3.3096e-05	0.00782487
Coordinated Regulator	ztf-9	M00636_2.00	ALN	64	35	17.0017	2.05862	9.67453e-06	0.000102326
Coordinated Regulator	ztf-9	M00636_2.00	AQR	70	28	18.5956	1.50573	0.0120644	0.0132695
Coordinated Regulator	ztf-9	M00636_2.00	AS	61	36	16.2047	2.22157	9.55308e-07	0.000284846
Coordinated Regulator	ztf-9	M00636_2.00	ASE	169	73	44.8951	1.62601	1.13211e-05	0.0114018
Other	ztf-9	M00636_2.00	ASG	101	48	26.8308	1.78899	2.19616e-05	0.121242
Coordinated Regulator	ztf-9	M00636_2.00	ASH	179	69	47.5516	1.45106	0.000629332	0.0114865
Other	ztf-9	M00636_2.00	ASI	254	81	67.4755	1.20044	0.0363473	0.0540504
Coordinated Regulator	ztf-9	M00636_2.00	ASJ	147	55	39.0508	1.40842	0.00371156	0.0116109
Coordinated Regulator	ztf-9	M00636_2.00	ASK	171	58	45.4264	1.27679	0.0226532	0.0061382
Coordinated Regulator	ztf-9	M00636_2.00	AUA	62	31	16.4704	1.88217	0.000188971	0.00104393
Coordinated Regulator	ztf-9	M00636_2.00	AVA	86	53	22.846	2.31988	1.15632e-09	7.07491e-05
Coordinated Regulator	ztf-9	M00636_2.00	AVB	57	32	15.1421	2.11331	1.1915e-05	0.00215195
Coordinated Regulator	ztf-9	M00636_2.00	AVD	66	39	17.533	2.22438	3.61238e-07	0.00034742
Coordinated Regulator	ztf-9	M00636_2.00	AVE	64	37	17.0017	2.17625	1.24451e-06	0.00404069
Coordinated Regulator	ztf-9	M00636_2.00	AVF	41	19	10.8917	1.74445	0.0067654	0.0145793
Coordinated Regulator	ztf-9	M00636_2.00	AVG	60	34	15.9391	2.13312	5.32262e-06	0.03921
Coordinated Regulator	ztf-9	M00636_2.00	AVH	35	17	9.2978	1.82839	0.00593345	0.00656444
Other	ztf-9	M00636_2.00	AVJ	40	18	10.6261	1.69395	0.0113159	0.0599937
Coordinated Regulator	ztf-9	M00636_2.00	AVK	47	20	12.4856	1.60184	0.0152103	0.00689106
Coordinated Regulator	ztf-9	M00636_2.00	AVL	41	19	10.8917	1.74445	0.0067654	0.0416447
Coordinated Regulator	ztf-9	M00636_2.00	AVM	93	47	24.7056	1.9024	4.81975e-06	0.000137532
Other	ztf-9	M00636_2.00	AWA	85	36	22.5804	1.5943	0.00193507	0.063864
Coordinated Regulator	ztf-9	M00636_2.00	AWB	119	47	31.6125	1.48675	0.00227613	0.0250864
Coordinated Regulator	ztf-9	M00636_2.00	AWC	161	70	42.7699	1.63667	1.31221e-05	0.0323398
Coordinated Regulator	ztf-9	M00636_2.00	BAG	87	44	23.1117	1.9038	8.85628e-06	0.00404069
Coordinated Regulator	ztf-9	M00636_2.00	BDU	68	29	18.0643	1.60538	0.00427464	0.00093469
Coordinated Regulator	ztf-9	M00636_2.00	CAN	89	45	23.643	1.90331	7.22327e-06	0.00939422
Coordinated Regulator	ztf-9	M00636_2.00	CEP	69	32	18.3299	1.74578	0.000670479	0.0171545
Coordinated Regulator	ztf-9	M00636_2.00	DA	78	48	20.7208	2.31651	5.93942e-09	0.000128349
Coordinated Regulator	ztf-9	M00636_2.00	DB	63	39	16.736	2.3303	1.05904e-07	0.000418126
Coordinated Regulator	ztf-9	M00636_2.00	DD	55	29	14.6108	1.98483	0.000102928	0.00418429
Coordinated Regulator	ztf-9	M00636_2.00	DVA	75	45	19.9239	2.2586	4.21171e-08	7.76372e-05
Other	ztf-9	M00636_2.00	DVB	46	24	12.22	1.964	0.000446517	0.0641779
Coordinated Regulator	ztf-9	M00636_2.00	DVC	49	21	13.0169	1.61328	0.0121162	0.0334424
Other	ztf-9	M00636_2.00	FLP	72	33	19.1269	1.72532	0.000704898	0.145594
Coordinated Regulator	ztf-9	M00636_2.00	HSN	122	64	32.4095	1.97473	4.00209e-08	3.12094e-07
Coordinated Regulator	ztf-9	M00636_2.00	I1	48	24	12.7513	1.88217	0.00088527	0.0188978
Coordinated Regulator	ztf-9	M00636_2.00	I2	55	24	14.6108	1.64262	0.00621616	0.0114018
Coordinated Regulator	ztf-9	M00636_2.00	I3	46	19	12.22	1.55483	0.0241098	0.0186294
Other	ztf-9	M00636_2.00	I4	42	20	11.1574	1.79254	0.00402992	0.135081
Other	ztf-9	M00636_2.00	I5	47	22	12.4856	1.76203	0.00343093	0.0895713
Other	ztf-9	M00636_2.00	I6	40	20	10.6261	1.88217	0.0021408	0.133647
Other	ztf-9	M00636_2.00	IL1	55	24	14.6108	1.64262	0.00621616	0.509115
Coordinated Regulator	ztf-9	M00636_2.00	IL2	62	29	16.4704	1.76074	0.000971591	0.000536576
Coordinated Regulator	ztf-9	M00636_2.00	LUA	50	27	13.2826	2.03274	0.000107885	0.00567299
Coordinated Regulator	ztf-9	M00636_2.00	M1	48	21	12.7513	1.64689	0.00956587	0.0364399
Other	ztf-9	M00636_2.00	M2	43	22	11.423	1.92594	0.000980639	0.188768
Other	ztf-9	M00636_2.00	M3	44	21	11.6887	1.79661	0.00320895	0.222738
Other	ztf-9	M00636_2.00	M4	52	28	13.8139	2.02695	8.82706e-05	0.0765055
Coordinated Regulator	ztf-9	M00636_2.00	M5	50	24	13.2826	1.80688	0.00163481	0.0223327
Coordinated Regulator	ztf-9	M00636_2.00	MC	37	17	9.8291	1.72956	0.010862	0.0353683
Other	ztf-9	M00636_2.00	MI	40	16	10.6261	1.50573	0.0477679	0.18581
Coordinated Regulator	ztf-9	M00636_2.00	NSM	78	40	20.7208	1.93043	1.46846e-05	0.00035166
Coordinated Regulator	ztf-9	M00636_2.00	OLL	78	33	20.7208	1.5926	0.00289016	0.0387729
Coordinated Regulator	ztf-9	M00636_2.00	OLQ	75	34	19.9239	1.7065	0.000731483	0.0210059
Coordinated Regulator	ztf-9	M00636_2.00	PDA	51	29	13.5482	2.1405	2.10098e-05	0.00146915
Coordinated Regulator	ztf-9	M00636_2.00	PDB	38	20	10.0948	1.98123	0.00107139	0.00039831
Coordinated Regulator	ztf-9	M00636_2.00	PDE	73	36	19.3926	1.85638	8.7901e-05	0.00266405
Coordinated Regulator	ztf-9	M00636_2.00	PHA	163	57	43.3012	1.31636	0.0131324	0.00344806
Coordinated Regulator	ztf-9	M00636_2.00	PHB	160	58	42.5042	1.36457	0.00596257	0.000200891
Coordinated Regulator	ztf-9	M00636_2.00	PHC	52	26	13.8139	1.88217	0.000567209	0.0114865
Coordinated Regulator	ztf-9	M00636_2.00	PLM	133	66	35.3316	1.86801	1.99158e-07	0.00792982
Coordinated Regulator	ztf-9	M00636_2.00	PLN	51	26	13.5482	1.91907	0.000408884	0.0440425
Coordinated Regulator	ztf-9	M00636_2.00	PQR	99	42	26.2995	1.59699	0.000895081	0.019121
Coordinated Regulator	ztf-9	M00636_2.00	PVC	80	49	21.2521	2.30565	5.00075e-09	0.00209235
Coordinated Regulator	ztf-9	M00636_2.00	PVD	97	43	25.7682	1.66872	0.000301135	3.54672e-05
Coordinated Regulator	ztf-9	M00636_2.00	PVM	84	43	22.3147	1.92698	7.90916e-06	2.41874e-05
Other	ztf-9	M00636_2.00	PVN	43	20	11.423	1.75085	0.00539276	0.0602231
Coordinated Regulator	ztf-9	M00636_2.00	PVP	51	26	13.5482	1.91907	0.000408884	0.00452243
Coordinated Regulator	ztf-9	M00636_2.00	PVQ	83	42	22.0491	1.90484	1.34581e-05	0.000618635
Other	ztf-9	M00636_2.00	PVR	54	26	14.3452	1.81246	0.00105452	0.332357
Other	ztf-9	M00636_2.00	PVT	153	55	40.6447	1.35319	0.00847887	0.35045
Other	ztf-9	M00636_2.00	PVW	40	19	10.6261	1.78806	0.00508934	0.246618
Other	ztf-9	M00636_2.00	RIA	56	25	14.8765	1.68051	0.00390395	0.13142
Coordinated Regulator	ztf-9	M00636_2.00	RIB	55	29	14.6108	1.98483	0.000102928	0.0175537
Coordinated Regulator	ztf-9	M00636_2.00	RIC	55	28	14.6108	1.91639	0.000266382	0.000497326
Coordinated Regulator	ztf-9	M00636_2.00	RID	53	25	14.0795	1.77563	0.00174553	0.00825475
Coordinated Regulator	ztf-9	M00636_2.00	RIF	53	29	14.0795	2.05973	4.79122e-05	0.00102347
Coordinated Regulator	ztf-9	M00636_2.00	RIG	58	27	15.4078	1.75236	0.00150408	0.0395927
Coordinated Regulator	ztf-9	M00636_2.00	RIH	49	22	13.0169	1.69011	0.00588231	0.00286247
Coordinated Regulator	ztf-9	M00636_2.00	RIM	64	34	17.0017	1.9998	2.45238e-05	0.00669919
Other	ztf-9	M00636_2.00	RIP	36	16	9.56345	1.67304	0.0181769	0.0623728
Coordinated Regulator	ztf-9	M00636_2.00	RIR	34	15	9.03215	1.66073	0.0233072	0.0397826
Coordinated Regulator	ztf-9	M00636_2.00	RIS	49	23	13.0169	1.76693	0.0027398	0.00495362
Coordinated Regulator	ztf-9	M00636_2.00	RIV	54	32	14.3452	2.23071	3.249e-06	0.00516509
Coordinated Regulator	ztf-9	M00636_2.00	RMD	71	38	18.8613	2.01471	7.80842e-06	0.000161952
Coordinated Regulator	ztf-9	M00636_2.00	RME	61	30	16.2047	1.85131	0.000326635	0.0038436
Coordinated Regulator	ztf-9	M00636_2.00	RMF	37	19	9.8291	1.93303	0.00191692	0.00587249
Coordinated Regulator	ztf-9	M00636_2.00	RMG	44	23	11.6887	1.96772	0.000554699	0.000381874
Coordinated Regulator	ztf-9	M00636_2.00	RMH	36	16	9.56345	1.67304	0.0181769	0.0209136
Coordinated Regulator	ztf-9	M00636_2.00	SAA	47	27	12.4856	2.16249	3.12371e-05	0.00244583
Coordinated Regulator	ztf-9	M00636_2.00	SAB	55	29	14.6108	1.98483	0.000102928	1.83723e-05
Coordinated Regulator	ztf-9	M00636_2.00	SDQ	63	33	16.736	1.97179	4.35874e-05	1.86975e-06
Coordinated Regulator	ztf-9	M00636_2.00	SIA	58	35	15.4078	2.27158	7.26425e-07	0.0039849
Coordinated Regulator	ztf-9	M00636_2.00	SIB	48	27	12.7513	2.11744	4.79122e-05	0.00214536
Coordinated Regulator	ztf-9	M00636_2.00	SMB	40	22	10.6261	2.07038	0.000322838	0.00120665
Coordinated Regulator	ztf-9	M00636_2.00	SMD	68	40	18.0643	2.21431	2.98132e-07	0.000217338
Coordinated Regulator	ztf-9	M00636_2.00	URA	46	23	12.22	1.88217	0.00110071	0.000804345
Piecemeal Regulator	ztf-9	M00636_2.00	URB	44	16	11.6887	1.36885	0.102149	0.00318119
Coordinated Regulator	ztf-9	M00636_2.00	URX	88	48	23.3773	2.05327	3.45341e-07	0.00615634
Coordinated Regulator	ztf-9	M00636_2.00	URY	47	23	12.4856	1.84212	0.00151342	0.00369238
Coordinated Regulator	ztf-9	M00636_2.00	VA	67	36	17.7986	2.02263	1.16914e-05	0.000993409
Coordinated Regulator	ztf-9	M00636_2.00	VB	61	35	16.2047	2.15986	2.96158e-06	0.000819424
Coordinated Regulator	ztf-9	M00636_2.00	VC	59	34	15.6734	2.16928	3.4807e-06	0.000428471
Coordinated Regulator	ztf-9	M00636_2.00	VD	49	26	13.0169	1.9974	0.000199144	0.000922884
Coordinated Regulator	die-1	M00610_2.00	ADE	66	63	56.6981	1.11115	0.014364	6.58774e-07
Coordinated Regulator	die-1	M00610_2.00	ADF	114	107	97.9331	1.09258	0.00799772	2.75153e-05
Coordinated Regulator	die-1	M00610_2.00	AIB	54	54	46.3894	1.16406	0.000592128	0.000110031
Coordinated Regulator	die-1	M00610_2.00	AIZ	54	53	46.3894	1.1425	0.00393786	2.28343e-06
Coordinated Regulator	die-1	M00610_2.00	ASE	169	162	145.182	1.11584	6.68897e-05	1.62847e-08
Coordinated Regulator	die-1	M00610_2.00	ASH	179	167	153.772	1.08602	0.00240546	8.41402e-05
Coordinated Regulator	die-1	M00610_2.00	AWC	161	151	138.309	1.09176	0.00211371	5.01934e-07
Coordinated Regulator	die-1	M00610_2.00	NSM	78	77	67.0069	1.14914	0.000256775	8.96847e-08
Coordinated Regulator	die-1	M00610_2.00	PDE	73	70	62.7116	1.11622	0.0071892	1.20391e-05
Other	mnm-2	M00616_2.00	M3	44	19	9.76391	1.94594	0.00242587	0.192152
Coordinated Regulator	mnm-2	M00616_2.00	PQR	99	40	21.9688	1.82076	0.000106672	0.0219264
Other	mnm-2	M00616_2.00	RIH	49	22	10.8734	2.02328	0.000712299	0.538943
Other	mnm-2	M00616_2.00	URB	44	18	9.76391	1.84352	0.00563915	0.454959
Coordinated Regulator	mnm-2	M00616_2.00	URX	88	40	19.5278	2.04836	6.72451e-06	0.0485467
Other	ref-2	M00621_2.00	IL1	55	21	11.5589	1.81678	0.00393775	0.0738576
Coordinated Regulator	ztf-2	M01866_2.00	CAN	89	57	35.8542	1.58977	2.19616e-05	1.22108e-05
Coordinated Regulator	syd-9	M00646_2.00	ADE	66	42	26.4769	1.58629	0.00025131	0.00129609
Coordinated Regulator	syd-9	M00646_2.00	AS	61	44	24.471	1.79804	3.09262e-06	1.93302e-05
Coordinated Regulator	syd-9	M00646_2.00	ASE	169	96	67.7968	1.416	3.2603e-05	1.87978e-05
Coordinated Regulator	syd-9	M00646_2.00	ASG	101	58	40.5176	1.43148	0.000678029	0.0414804
Coordinated Regulator	syd-9	M00646_2.00	AUA	62	39	24.8722	1.56802	0.000529364	1.29301e-06
Coordinated Regulator	syd-9	M00646_2.00	DB	63	44	25.2734	1.74096	9.63364e-06	0.00215709
Coordinated Regulator	syd-9	M00646_2.00	DVB	46	28	18.4536	1.51732	0.00502487	0.00386419
Coordinated Regulator	syd-9	M00646_2.00	PDB	38	24	15.2443	1.57436	0.00490194	0.00753461
Coordinated Regulator	syd-9	M00646_2.00	PHB	160	76	64.1863	1.18405	0.0375443	5.66209e-05
Other	syd-9	M00646_2.00	PHC	52	33	20.8606	1.58193	0.00107247	0.276324
Coordinated Regulator	syd-9	M00646_2.00	RIA	56	33	22.4652	1.46894	0.0048424	0.008973
Coordinated Regulator	syd-9	M00646_2.00	RIC	55	37	22.064	1.67694	0.000126663	1.72574e-05
Coordinated Regulator	syd-9	M00646_2.00	RIG	58	36	23.2675	1.54722	0.00112846	0.00552612
Coordinated Regulator	syd-9	M00646_2.00	SIA	58	39	23.2675	1.67615	8.73699e-05	2.18515e-05
Coordinated Regulator	syd-9	M00646_2.00	SIB	48	31	19.2559	1.6099	0.00102043	0.00404069
Other	egl-43	M00611_2.00	ADE	66	29	15.1484	1.91439	0.000320936	0.0856984
Coordinated Regulator	egl-43	M00611_2.00	ADF	114	42	26.1654	1.60517	0.0010657	0.00386888
Coordinated Regulator	egl-43	M00611_2.00	ADL	190	63	43.609	1.44465	0.00146173	0.0133992
Coordinated Regulator	egl-43	M00611_2.00	ASH	179	58	41.0843	1.41173	0.00349516	0.0138959
Other	egl-43	M00611_2.00	ASI	254	76	58.2984	1.30364	0.00772258	0.226273
Other	egl-43	M00611_2.00	ASJ	147	43	33.7396	1.27447	0.0485272	0.28707
Coordinated Regulator	egl-43	M00611_2.00	CEP	69	31	15.837	1.95745	0.000133748	0.0355306
Coordinated Regulator	egl-43	M00611_2.00	FLP	72	29	16.5255	1.75486	0.00137298	0.0034651
Coordinated Regulator	egl-43	M00611_2.00	HSN	122	55	28.0016	1.96417	6.27225e-07	3.60816e-05
Other	egl-43	M00611_2.00	IL1	55	23	12.6237	1.82197	0.0022956	0.0863596
Other	egl-43	M00611_2.00	LUA	50	22	11.4761	1.91703	0.00143065	0.161836
Coordinated Regulator	egl-43	M00611_2.00	NSM	78	34	17.9027	1.89916	0.000127515	0.0103579
Coordinated Regulator	egl-43	M00611_2.00	OLQ	75	30	17.2141	1.74276	0.00130119	0.036913
Other	egl-43	M00611_2.00	PHA	163	53	37.412	1.41666	0.00462509	0.529816
Other	egl-43	M00611_2.00	PHB	160	54	36.7234	1.47045	0.0019583	0.302002
Other	egl-43	M00611_2.00	PVD	97	33	22.2636	1.48224	0.0106737	0.0808411
Coordinated Regulator	egl-43	M00611_2.00	RIG	58	26	13.3122	1.95309	0.000440615	0.00360302
Coordinated Regulator	egl-43	M00611_2.00	URA	46	19	10.558	1.79959	0.00578803	0.0258626
Other	ces-1	M00608_2.00	SAB	55	21	8.62471	2.43486	0.000131139	0.273605
Coordinated Regulator	che-1	OH2004_CHE-1	ASE	169	116	67.5361	1.7176	1.14824e-11	1.41355e-12
Coordinated Regulator	lsy-2	M00615_2.00	ASE	169	109	83.3141	1.3083	0.000135102	4.67747e-07
Piecemeal Regulator	lsy-2	M00615_2.00	I4	42	24	20.7053	1.15912	0.196784	0.000297237
Coordinated Regulator	pag-3	M00619_2.00	ALM	125	79	61.6478	1.28147	0.00199628	1.62847e-08
Coordinated Regulator	pag-3	M00619_2.00	AVD	66	50	32.55	1.5361	3.88513e-05	5.2902e-06
Coordinated Regulator	pag-3	M00619_2.00	AVE	64	47	31.5637	1.48905	0.000199144	1.23374e-06
Piecemeal Regulator	pag-3	M00619_2.00	AVF	41	25	20.2205	1.23637	0.093501	0.00926014
Coordinated Regulator	pag-3	M00619_2.00	AVH	35	24	17.2614	1.39039	0.0195245	0.014285
Coordinated Regulator	pag-3	M00619_2.00	AVJ	40	26	19.7273	1.31797	0.036577	0.00727014
Coordinated Regulator	pag-3	M00619_2.00	AVM	93	65	45.8659	1.41717	0.000133575	4.35768e-07
Coordinated Regulator	pag-3	M00619_2.00	BDU	68	48	33.5364	1.43128	0.000642276	8.04177e-05
Coordinated Regulator	pag-3	M00619_2.00	I1	48	31	23.6727	1.30952	0.0269	0.0201617
Coordinated Regulator	pag-3	M00619_2.00	PLM	133	85	65.5932	1.29587	0.000940167	5.31182e-08
Coordinated Regulator	pag-3	M00619_2.00	PVC	80	60	39.4546	1.52074	1.26321e-05	3.05941e-07
Coordinated Regulator	pag-3	M00619_2.00	PVM	84	58	41.4273	1.40004	0.00044735	6.40305e-06
Coordinated Regulator	pag-3	M00619_2.00	PVQ	83	57	40.9341	1.39248	0.000595486	1.70468e-05
Other	pag-3	M00619_2.00	PVW	40	25	19.7273	1.26728	0.0682847	0.0643769
Coordinated Regulator	pag-3	M00619_2.00	RIG	58	36	28.6046	1.25854	0.0378135	0.000685776
Coordinated Regulator	pag-3	M00619_2.00	VA	67	46	33.0432	1.39212	0.00178998	2.36812e-05
Coordinated Regulator	pag-3	M00619_2.00	VB	61	41	30.0841	1.36285	0.0050581	3.65417e-05
Coordinated Regulator	pag-3	M00619_2.00	VC	59	41	29.0977	1.40904	0.00219369	3.0288e-06
Coordinated Regulator	eor-1	M01865_2.00	CAN	89	32	17.5529	1.82307	0.000563059	0.000261141
Other	ztf-14	M00628_2.00	ADF	114	42	26.2732	1.59859	0.00114794	0.113228
Coordinated Regulator	ztf-14	M00628_2.00	AVJ	40	15	9.21867	1.62713	0.0311014	8.93489e-05
Coordinated Regulator	ztf-14	M00628_2.00	DVC	49	18	11.2929	1.59393	0.0242787	0.00189222
Coordinated Regulator	ztf-14	M00628_2.00	RIG	58	26	13.3671	1.94508	0.000464144	0.00608148
Coordinated Regulator	ztf-11	M00650_2.00	ADA	47	38	30.1942	1.25852	0.0127646	0.000370164
Coordinated Regulator	ztf-11	M00650_2.00	ADE	66	54	42.4004	1.27357	0.00230152	3.05941e-07
Coordinated Regulator	ztf-11	M00650_2.00	ADF	114	95	73.2371	1.29716	2.33469e-05	2.96015e-06
Coordinated Regulator	ztf-11	M00650_2.00	ADL	190	156	122.062	1.27804	5.21593e-07	0.0273019
Coordinated Regulator	ztf-11	M00650_2.00	AFD	96	82	61.6733	1.32959	1.5729e-05	3.08561e-09
Coordinated Regulator	ztf-11	M00650_2.00	AIA	53	43	34.0488	1.26289	0.00763962	8.67128e-05
Coordinated Regulator	ztf-11	M00650_2.00	AIB	54	45	34.6913	1.29716	0.00268204	1.21042e-05
Coordinated Regulator	ztf-11	M00650_2.00	AIM	62	49	39.8307	1.23021	0.0109478	4.48681e-06
Coordinated Regulator	ztf-11	M00650_2.00	AIN	50	42	32.1215	1.30753	0.00277682	8.76459e-06
Coordinated Regulator	ztf-11	M00650_2.00	AIY	108	90	69.3825	1.29716	3.6979e-05	5.47605e-11
Coordinated Regulator	ztf-11	M00650_2.00	AIZ	54	46	34.6913	1.32598	0.00107108	6.25195e-06
Coordinated Regulator	ztf-11	M00650_2.00	ALA	55	42	35.3337	1.18867	0.0415111	0.000161952
Coordinated Regulator	ztf-11	M00650_2.00	ALM	125	99	80.3038	1.23282	0.000462961	7.70596e-10
Coordinated Regulator	ztf-11	M00650_2.00	ALN	64	51	41.1156	1.24041	0.00732813	2.47157e-06
Coordinated Regulator	ztf-11	M00650_2.00	AQR	70	61	44.9701	1.35646	5.43807e-05	3.0288e-06
Coordinated Regulator	ztf-11	M00650_2.00	AS	61	50	39.1883	1.27589	0.00304797	2.75669e-07
Coordinated Regulator	ztf-11	M00650_2.00	ASE	169	136	108.571	1.25264	1.47317e-05	2.82348e-09
Coordinated Regulator	ztf-11	M00650_2.00	ASG	101	86	64.8855	1.32541	1.28716e-05	5.97985e-07
Coordinated Regulator	ztf-11	M00650_2.00	ASH	179	147	114.995	1.27832	1.03209e-06	1.70644e-06
Coordinated Regulator	ztf-11	M00650_2.00	ASI	254	188	163.177	1.15212	0.00102295	7.74105e-05
Coordinated Regulator	ztf-11	M00650_2.00	ASJ	147	116	94.4373	1.22833	0.000217078	0.000290704
Coordinated Regulator	ztf-11	M00650_2.00	ASK	171	139	109.856	1.2653	5.00697e-06	4.44985e-05
Coordinated Regulator	ztf-11	M00650_2.00	AUA	62	53	39.8307	1.33063	0.000412441	1.05324e-07
Coordinated Regulator	ztf-11	M00650_2.00	AVA	86	76	55.249	1.37559	2.98076e-06	1.62847e-08
Coordinated Regulator	ztf-11	M00650_2.00	AVB	57	49	36.6185	1.33812	0.000516603	6.82821e-07
Coordinated Regulator	ztf-11	M00650_2.00	AVD	66	55	42.4004	1.29716	0.00101743	4.58807e-07
Coordinated Regulator	ztf-11	M00650_2.00	AVE	64	51	41.1156	1.24041	0.00732813	1.50813e-07
Coordinated Regulator	ztf-11	M00650_2.00	AVF	41	33	26.3397	1.25286	0.0218745	0.00058439
Coordinated Regulator	ztf-11	M00650_2.00	AVG	60	50	38.5458	1.29716	0.00164011	3.05941e-07
Coordinated Regulator	ztf-11	M00650_2.00	AVH	35	30	22.4851	1.33422	0.00604696	0.00090053
Coordinated Regulator	ztf-11	M00650_2.00	AVJ	40	32	25.6972	1.24527	0.0272005	0.000600447
Coordinated Regulator	ztf-11	M00650_2.00	AVK	47	37	30.1942	1.2254	0.0272096	0.000292088
Coordinated Regulator	ztf-11	M00650_2.00	AVL	41	32	26.3397	1.2149	0.0459546	0.000284846
Coordinated Regulator	ztf-11	M00650_2.00	AVM	93	75	59.746	1.25531	0.000854707	1.50813e-07
Coordinated Regulator	ztf-11	M00650_2.00	AWA	85	70	54.6066	1.2819	0.000450536	2.02502e-05
Coordinated Regulator	ztf-11	M00650_2.00	AWB	119	98	76.4492	1.2819	4.09235e-05	4.29873e-05
Coordinated Regulator	ztf-11	M00650_2.00	AWC	161	127	103.431	1.22787	0.00011633	1.46093e-08
Coordinated Regulator	ztf-11	M00650_2.00	BAG	87	74	55.8915	1.32399	4.85681e-05	2.75669e-07
Coordinated Regulator	ztf-11	M00650_2.00	BDU	68	56	43.6853	1.2819	0.00151255	1.10883e-06
Coordinated Regulator	ztf-11	M00650_2.00	CAN	89	80	57.1763	1.39918	4.0436e-07	7.86848e-08
Coordinated Regulator	ztf-11	M00650_2.00	CEP	69	58	44.3277	1.30844	0.000516603	4.86612e-08
Coordinated Regulator	ztf-11	M00650_2.00	DA	78	66	50.1096	1.31711	0.000159382	4.33026e-08
Coordinated Regulator	ztf-11	M00650_2.00	DB	63	54	40.4731	1.33422	0.0003239	7.40877e-06
Coordinated Regulator	ztf-11	M00650_2.00	DD	55	46	35.3337	1.30187	0.00212492	1.44314e-05
Coordinated Regulator	ztf-11	M00650_2.00	DVA	75	66	48.1823	1.3698	1.56913e-05	3.05941e-07
Coordinated Regulator	ztf-11	M00650_2.00	DVB	46	39	29.5518	1.31972	0.00282869	4.1256e-05
Coordinated Regulator	ztf-11	M00650_2.00	DVC	49	40	31.4791	1.27068	0.00823105	5.86754e-05
Coordinated Regulator	ztf-11	M00650_2.00	FLP	72	56	46.255	1.21068	0.0118269	4.18963e-05
Coordinated Regulator	ztf-11	M00650_2.00	HSN	122	108	78.3765	1.37796	3.99417e-08	1.52846e-11
Coordinated Regulator	ztf-11	M00650_2.00	I1	48	37	30.8367	1.19987	0.0439929	0.00522635
Coordinated Regulator	ztf-11	M00650_2.00	I2	55	46	35.3337	1.30187	0.00212492	2.22205e-05
Piecemeal Regulator	ztf-11	M00650_2.00	I3	46	35	29.5518	1.18436	0.0639786	0.000543399
Coordinated Regulator	ztf-11	M00650_2.00	I4	42	36	26.9821	1.33422	0.00283502	0.00152192
Coordinated Regulator	ztf-11	M00650_2.00	I5	47	38	30.1942	1.25852	0.0127646	0.000912724
Coordinated Regulator	ztf-11	M00650_2.00	I6	40	34	25.6972	1.3231	0.00470056	0.0496991
Coordinated Regulator	ztf-11	M00650_2.00	IL1	55	44	35.3337	1.24527	0.0107924	0.000403539
Coordinated Regulator	ztf-11	M00650_2.00	IL2	62	49	39.8307	1.23021	0.0109478	4.05256e-05
Coordinated Regulator	ztf-11	M00650_2.00	LUA	50	41	32.1215	1.2764	0.00660574	3.99421e-05
Coordinated Regulator	ztf-11	M00650_2.00	M1	48	38	30.8367	1.2323	0.0222277	0.00404069
Coordinated Regulator	ztf-11	M00650_2.00	M2	43	35	27.6245	1.26699	0.0138971	0.00609176
Coordinated Regulator	ztf-11	M00650_2.00	M3	44	35	28.2669	1.2382	0.0245379	0.000339608
Coordinated Regulator	ztf-11	M00650_2.00	M4	52	44	33.4064	1.31711	0.00171872	0.000552575
Coordinated Regulator	ztf-11	M00650_2.00	M5	50	40	32.1215	1.24527	0.0145297	8.54878e-05
Coordinated Regulator	ztf-11	M00650_2.00	MC	37	31	23.7699	1.30417	0.00985813	0.00208336
Coordinated Regulator	ztf-11	M00650_2.00	MI	40	34	25.6972	1.3231	0.00470056	0.0184634
Coordinated Regulator	ztf-11	M00650_2.00	NSM	78	62	50.1096	1.23729	0.0038345	3.30335e-06
Coordinated Regulator	ztf-11	M00650_2.00	OLL	78	61	50.1096	1.21733	0.00737476	0.000270913
Coordinated Regulator	ztf-11	M00650_2.00	OLQ	75	58	48.1823	1.20376	0.012714	0.0001644
Coordinated Regulator	ztf-11	M00650_2.00	PDA	51	43	32.764	1.31242	0.00218035	1.14619e-05
Coordinated Regulator	ztf-11	M00650_2.00	PDB	38	32	24.4124	1.31081	0.00763962	0.00048526
Coordinated Regulator	ztf-11	M00650_2.00	PDE	73	57	46.8974	1.21542	0.00986346	2.58009e-07
Coordinated Regulator	ztf-11	M00650_2.00	PHA	163	131	104.716	1.251	2.19616e-05	1.03298e-05
Coordinated Regulator	ztf-11	M00650_2.00	PHB	160	134	102.789	1.30364	4.46871e-07	3.80352e-06
Coordinated Regulator	ztf-11	M00650_2.00	PHC	52	44	33.4064	1.31711	0.00171872	0.000195809
Coordinated Regulator	ztf-11	M00650_2.00	PLM	133	104	85.4433	1.21718	0.000722185	1.6013e-10
Coordinated Regulator	ztf-11	M00650_2.00	PLN	51	41	32.764	1.25138	0.0117825	0.000615303
Coordinated Regulator	ztf-11	M00650_2.00	PQR	99	83	63.6006	1.30502	4.80046e-05	2.59541e-08
Coordinated Regulator	ztf-11	M00650_2.00	PVC	80	65	51.3944	1.26473	0.00127891	1.40839e-08
Coordinated Regulator	ztf-11	M00650_2.00	PVD	97	75	62.3158	1.20355	0.00539276	2.75669e-07
Coordinated Regulator	ztf-11	M00650_2.00	PVM	84	69	53.9642	1.27863	0.00055589	6.10521e-07
Coordinated Regulator	ztf-11	M00650_2.00	PVN	43	36	27.6245	1.30319	0.00581757	0.000912217
Coordinated Regulator	ztf-11	M00650_2.00	PVP	51	43	32.764	1.31242	0.00218035	2.60463e-06
Coordinated Regulator	ztf-11	M00650_2.00	PVQ	83	67	53.3217	1.25652	0.00146173	9.31582e-08
Coordinated Regulator	ztf-11	M00650_2.00	PVR	54	45	34.6913	1.29716	0.00268204	1.71095e-05
Piecemeal Regulator	ztf-11	M00650_2.00	PVT	153	105	98.2919	1.06825	0.149539	0.0225182
Coordinated Regulator	ztf-11	M00650_2.00	PVW	40	32	25.6972	1.24527	0.0272005	0.0140058
Coordinated Regulator	ztf-11	M00650_2.00	RIA	56	44	35.9761	1.22303	0.0179341	0.00107116
Coordinated Regulator	ztf-11	M00650_2.00	RIB	55	46	35.3337	1.30187	0.00212492	0.000110031
Coordinated Regulator	ztf-11	M00650_2.00	RIC	55	49	35.3337	1.38678	9.24035e-05	1.9725e-05
Coordinated Regulator	ztf-11	M00650_2.00	RID	53	42	34.0488	1.23352	0.0162316	0.0079213
Coordinated Regulator	ztf-11	M00650_2.00	RIF	53	44	34.0488	1.29226	0.00337729	0.000149075
Coordinated Regulator	ztf-11	M00650_2.00	RIG	58	47	37.261	1.26137	0.00575485	1.54554e-05
Coordinated Regulator	ztf-11	M00650_2.00	RIH	49	38	31.4791	1.20715	0.0362776	0.000232953
Coordinated Regulator	ztf-11	M00650_2.00	RIM	64	52	41.1156	1.26473	0.00351756	6.94656e-06
Piecemeal Regulator	ztf-11	M00650_2.00	RIP	36	27	23.1275	1.16744	0.121945	0.000403539
Coordinated Regulator	ztf-11	M00650_2.00	RIR	34	28	21.8426	1.2819	0.0205084	0.000428471
Piecemeal Regulator	ztf-11	M00650_2.00	RIS	49	37	31.4791	1.17538	0.0673859	6.16587e-05
Coordinated Regulator	ztf-11	M00650_2.00	RIV	54	46	34.6913	1.32598	0.00107108	3.62276e-05
Coordinated Regulator	ztf-11	M00650_2.00	RMD	71	62	45.6126	1.35927	4.23222e-05	1.35014e-05
Coordinated Regulator	ztf-11	M00650_2.00	RME	61	51	39.1883	1.30141	0.00131792	4.66767e-07
Coordinated Regulator	ztf-11	M00650_2.00	RMF	37	30	23.7699	1.2621	0.0239149	0.000573248
Coordinated Regulator	ztf-11	M00650_2.00	RMG	44	37	28.2669	1.30895	0.00461275	2.36812e-05
Coordinated Regulator	ztf-11	M00650_2.00	RMH	36	30	23.1275	1.29716	0.0125398	0.0292702
Coordinated Regulator	ztf-11	M00650_2.00	SAA	47	40	30.1942	1.32476	0.00220428	1.81203e-05
Coordinated Regulator	ztf-11	M00650_2.00	SAB	55	46	35.3337	1.30187	0.00212492	5.92482e-07
Coordinated Regulator	ztf-11	M00650_2.00	SDQ	63	53	40.4731	1.30951	0.000834681	1.62847e-08
Coordinated Regulator	ztf-11	M00650_2.00	SIA	58	50	37.261	1.34189	0.000404501	3.0288e-06
Coordinated Regulator	ztf-11	M00650_2.00	SIB	48	41	30.8367	1.32959	0.0017248	0.000290704
Coordinated Regulator	ztf-11	M00650_2.00	SMB	40	34	25.6972	1.3231	0.00470056	9.17998e-05
Coordinated Regulator	ztf-11	M00650_2.00	SMD	68	60	43.6853	1.37346	3.04976e-05	1.70644e-06
Coordinated Regulator	ztf-11	M00650_2.00	URA	46	38	29.5518	1.28588	0.00700242	0.000191979
Coordinated Regulator	ztf-11	M00650_2.00	URB	44	34	28.2669	1.20282	0.0497164	0.0114866
Coordinated Regulator	ztf-11	M00650_2.00	URX	88	76	56.5339	1.34433	1.49666e-05	5.31182e-08
Coordinated Regulator	ztf-11	M00650_2.00	URY	47	37	30.1942	1.2254	0.0272096	0.000526413
Coordinated Regulator	ztf-11	M00650_2.00	VA	67	56	43.0428	1.30103	0.000814509	2.17438e-07
Coordinated Regulator	ztf-11	M00650_2.00	VB	61	52	39.1883	1.32693	0.000522875	3.23209e-06
Coordinated Regulator	ztf-11	M00650_2.00	VC	59	50	37.9034	1.31914	0.000845128	3.94491e-05
Coordinated Regulator	ztf-11	M00650_2.00	VD	49	43	31.4791	1.36599	0.000469053	1.70468e-05
Coordinated Regulator	dmd-6	M00655_2.00	ADF	114	98	81.5542	1.20165	0.000479794	2.5004e-05
Coordinated Regulator	dmd-6	M00655_2.00	ADL	190	152	135.924	1.11827	0.00649537	0.0131755
Coordinated Regulator	dmd-6	M00655_2.00	AIZ	54	48	38.6309	1.24253	0.0030774	2.21499e-05
Coordinated Regulator	dmd-6	M00655_2.00	ASG	101	86	72.2542	1.19024	0.00171872	2.92291e-06
Coordinated Regulator	dmd-6	M00655_2.00	ASH	179	145	128.054	1.13233	0.00350415	4.14679e-06
Coordinated Regulator	dmd-6	M00655_2.00	ASI	254	202	181.708	1.11167	0.00336045	0.00880025
Coordinated Regulator	dmd-6	M00655_2.00	ASJ	147	125	105.162	1.18864	0.000235072	0.0020308
Coordinated Regulator	dmd-6	M00655_2.00	ASK	171	136	122.331	1.11174	0.0130976	0.000237807
Coordinated Regulator	dmd-6	M00655_2.00	AUA	62	53	44.354	1.19493	0.0100096	3.80761e-06
Coordinated Regulator	dmd-6	M00655_2.00	AWA	85	72	60.808	1.18406	0.0048725	0.000844449
Coordinated Regulator	dmd-6	M00655_2.00	AWC	161	136	115.177	1.18079	0.000230814	3.05941e-07
Coordinated Regulator	dmd-6	M00655_2.00	BAG	87	73	62.2387	1.1729	0.00707606	8.59071e-07
Piecemeal Regulator	dmd-6	M00655_2.00	IL2	62	50	44.354	1.12729	0.0730655	0.00330052
Coordinated Regulator	dmd-6	M00655_2.00	MC	37	32	26.4693	1.20895	0.0304314	0.0463641
Coordinated Regulator	dmd-6	M00655_2.00	NSM	78	71	55.8002	1.2724	7.96153e-05	4.25274e-05
Coordinated Regulator	dmd-6	M00655_2.00	PHA	163	132	116.608	1.132	0.00516406	3.7564e-05
Coordinated Regulator	dmd-6	M00655_2.00	PHB	160	129	114.462	1.12701	0.00721293	6.91286e-05
Coordinated Regulator	dmd-6	M00655_2.00	RIG	58	51	41.4925	1.22914	0.00374347	0.000180086
Coordinated Regulator	dmd-6	M00655_2.00	RIH	49	41	35.054	1.16962	0.0404092	0.0333286
Piecemeal Regulator	dmd-6	M00655_2.00	RIR	34	29	24.3232	1.19228	0.0533098	0.0204366
Other	dmd-9	M00661_2.00	AFD	96	39	18.5799	2.09905	7.54855e-06	0.0661036
Coordinated Regulator	dmd-9	M00661_2.00	ASE	169	64	32.7083	1.95669	2.5214e-07	0.00736496
Other	dmd-9	M00661_2.00	ASG	101	39	19.5476	1.99513	2.35098e-05	0.207199
Other	dmd-9	M00661_2.00	AWB	119	43	23.0313	1.86702	4.83135e-05	0.344707
Coordinated Regulator	dmd-9	M00661_2.00	AWC	161	62	31.16	1.98973	2.16076e-07	0.0121316
Coordinated Regulator	dmd-9	M00661_2.00	BAG	87	37	16.838	2.19741	4.32247e-06	0.00272379
Coordinated Regulator	dmd-8	M00660_2.00	AFD	96	87	69.4273	1.25311	3.63514e-05	1.98731e-08
Coordinated Regulator	elt-1	M08206_2.00	AS	61	30	19.793	1.51569	0.00649537	3.23209e-06
Coordinated Regulator	elt-1	M08206_2.00	DD	55	27	17.8461	1.51293	0.00959279	1.40431e-05
Piecemeal Regulator	elt-1	M08206_2.00	PDB	38	16	12.33	1.29764	0.139625	9.17998e-05
Piecemeal Regulator	elt-1	M08206_2.00	RIF	53	23	17.1972	1.33743	0.06522	6.61337e-05
Coordinated Regulator	elt-1	M08206_2.00	SAB	55	27	17.8461	1.51293	0.00959279	0.000573248
Coordinated Regulator	elt-1	M08206_2.00	VD	49	23	15.8993	1.44661	0.0272005	2.12185e-06
Coordinated Regulator	egl-27	M08205_2.00	DA	78	54	34.5709	1.56201	3.09838e-05	0.0270173
Other	egl-27	M08205_2.00	DB	63	46	27.9227	1.64741	1.74098e-05	0.0503996
Other	egl-27	M08205_2.00	IL2	62	35	27.4794	1.27368	0.0399221	0.316205
Other	egl-27	M08205_2.00	M1	48	31	21.2744	1.45715	0.00521733	0.603363
Other	egl-27	M08205_2.00	RIG	58	40	25.7066	1.55602	0.000323403	0.146053
Coordinated Regulator	nhr-46	M00692_2.00	RID	53	32	22.2113	1.44071	0.00679756	0.0423054
Coordinated Regulator	nhr-66	M00694_2.00	CAN	89	61	37.8164	1.61306	4.32247e-06	1.12732e-06
Coordinated Regulator	nhr-84	M02414_2.00	ASG	101	54	37.6375	1.43474	0.00122065	1.2445e-05
Coordinated Regulator	nhr-84	M02414_2.00	ASK	171	94	63.7229	1.47514	9.81627e-06	0.00325529
Coordinated Regulator	nhr-84	M02414_2.00	CEP	69	36	25.7128	1.40008	0.0102561	0.000286866
Other	nhr-84	M02414_2.00	I5	47	21	17.5145	1.19901	0.185965	0.0752343
Piecemeal Regulator	nhr-84	M02414_2.00	M1	48	20	17.8871	1.11812	0.313486	0.0114866
Other	nhr-84	M02414_2.00	M3	44	22	16.3965	1.34175	0.0607252	0.0540504
Piecemeal Regulator	nhr-84	M02414_2.00	M5	50	22	18.6324	1.18074	0.202149	0.00470228
Piecemeal Regulator	nhr-84	M02414_2.00	MC	37	15	13.788	1.0879	0.400672	0.00720416
Other	nhr-84	M02414_2.00	MI	40	18	14.9059	1.20757	0.199567	0.157095
Coordinated Regulator	nhr-84	M02414_2.00	NSM	78	46	29.0666	1.58257	0.000215766	2.68048e-06
Coordinated Regulator	nhr-84	M02414_2.00	PDE	73	37	27.2033	1.36013	0.0155847	0.0177953
Coordinated Regulator	nhr-6	M01298_2.00	ADL	190	103	81.6393	1.26165	0.00191285	0.0120732
Coordinated Regulator	nhr-6	M01298_2.00	AFD	96	60	41.2493	1.45457	0.000236334	3.65832e-05
Coordinated Regulator	nhr-6	M01298_2.00	AIB	54	37	23.2027	1.59464	0.000326635	0.000353906
Coordinated Regulator	nhr-6	M01298_2.00	ALA	55	39	23.6324	1.65027	8.37802e-05	0.014285
Coordinated Regulator	nhr-6	M01298_2.00	ASI	254	129	109.139	1.18198	0.00895773	0.00522635
Other	nhr-6	M01298_2.00	AVH	35	25	15.0388	1.66236	0.00116664	0.127138
Coordinated Regulator	nhr-6	M01298_2.00	AVK	47	33	20.195	1.63407	0.000354025	0.0361239
Coordinated Regulator	nhr-6	M01298_2.00	AWC	161	100	69.1786	1.44553	4.99759e-06	5.70659e-05
Coordinated Regulator	nhr-6	M01298_2.00	BAG	87	59	37.3822	1.57829	1.29938e-05	3.49259e-07
Coordinated Regulator	nhr-6	M01298_2.00	BDU	68	51	29.2183	1.74548	8.60169e-07	0.00025179
Coordinated Regulator	nhr-6	M01298_2.00	DVA	75	51	32.226	1.58257	3.97632e-05	0.00115362
Coordinated Regulator	nhr-6	M01298_2.00	DVC	49	33	21.0543	1.56737	0.000967089	0.00350319
Coordinated Regulator	nhr-6	M01298_2.00	PVM	84	53	36.0932	1.46842	0.000376121	0.00036363
Coordinated Regulator	nhr-6	M01298_2.00	PVR	54	36	23.2027	1.55154	0.000769961	0.0170183
Other	nhr-6	M01298_2.00	PVW	40	26	17.1872	1.51275	0.00564888	0.56093
Coordinated Regulator	nhr-6	M01298_2.00	RID	53	32	22.7731	1.40517	0.0100894	0.0330782
Coordinated Regulator	nhr-67	M02408_2.00	ADF	114	54	34.3974	1.56988	0.000221186	0.00564277
Coordinated Regulator	nhr-67	M02408_2.00	AIN	50	26	15.0866	1.72338	0.00174186	0.0130844
Coordinated Regulator	nhr-67	M02408_2.00	ASE	169	89	50.9927	1.74535	3.54062e-08	0.00227197
Coordinated Regulator	nhr-67	M02408_2.00	ASG	101	49	30.4749	1.60788	0.000220009	0.0205177
Coordinated Regulator	nhr-67	M02408_2.00	ASJ	147	63	44.3546	1.42037	0.00133794	0.000303128
Coordinated Regulator	nhr-67	M02408_2.00	AUA	62	36	18.7074	1.92437	2.11864e-05	0.00104335
Coordinated Regulator	nhr-67	M02408_2.00	AVA	86	50	25.9489	1.92686	7.52164e-07	0.00453488
Other	nhr-67	M02408_2.00	AVG	60	34	18.1039	1.87805	6.09701e-05	0.0716209
Other	nhr-67	M02408_2.00	AVL	41	22	12.371	1.77835	0.0023153	0.413028
Coordinated Regulator	nhr-67	M02408_2.00	AWB	119	58	35.9061	1.61532	5.54537e-05	0.00461303
Coordinated Regulator	nhr-67	M02408_2.00	CEP	69	38	20.8195	1.82521	5.08875e-05	0.00386722
Coordinated Regulator	nhr-67	M02408_2.00	DVA	75	41	22.6299	1.81176	3.39546e-05	0.024912
Coordinated Regulator	nhr-67	M02408_2.00	PVP	51	28	15.3883	1.81956	0.000462213	0.00797273
Other	nhr-67	M02408_2.00	RIH	49	22	14.7849	1.48801	0.0237032	0.0636629
Other	nhr-67	M02408_2.00	RIR	34	15	10.2589	1.46215	0.063069	0.0542289
Other	nhr-67	M02408_2.00	RIS	49	23	14.7849	1.55565	0.0121162	0.111758
Other	nhr-67	M02408_2.00	RME	61	35	18.4056	1.90159	3.63514e-05	0.117124
Coordinated Regulator	nhr-67	M02408_2.00	SIA	58	29	17.5004	1.6571	0.00200899	0.000499028
Coordinated Regulator	nhr-36	M02418_2.00	ADF	114	55	37.2114	1.47804	0.000772881	0.00950246
Other	nhr-36	M02418_2.00	ADL	190	83	62.019	1.3383	0.00159579	0.808206
Coordinated Regulator	nhr-36	M02418_2.00	AFD	96	51	31.3359	1.62753	8.60998e-05	0.00286247
Other	nhr-36	M02418_2.00	ASE	169	79	55.1643	1.43209	0.000239489	0.0921525
Coordinated Regulator	nhr-36	M02418_2.00	ASH	179	75	58.4284	1.28362	0.00749671	0.0187435
Other	nhr-36	M02418_2.00	ASJ	147	66	47.9831	1.37548	0.00206954	0.172664
Coordinated Regulator	nhr-36	M02418_2.00	AWC	161	85	52.553	1.61742	9.55308e-07	0.0192412
Coordinated Regulator	fax-1	M06432_2.00	AIY	108	91	67.4906	1.34834	4.10079e-06	1.8486e-11
Coordinated Regulator	fax-1	M06432_2.00	AVA	86	68	53.7425	1.26529	0.0013258	2.21858e-07
Coordinated Regulator	fax-1	M06432_2.00	AVB	57	47	35.62	1.31948	0.00157199	0.00097838
Coordinated Regulator	fax-1	M06432_2.00	AVE	64	48	39.9944	1.20017	0.0269325	0.000925755
Piecemeal Regulator	fax-1	M06432_2.00	AVK	47	35	29.3709	1.19166	0.0616281	0.00460349
Coordinated Regulator	fax-1	M06432_2.00	CEP	69	55	43.119	1.27554	0.00258009	3.94491e-05
Coordinated Regulator	fax-1	M06432_2.00	DVA	75	60	46.8685	1.28018	0.00151038	0.000252298
Other	fax-1	M06432_2.00	I3	46	34	28.746	1.18277	0.0744686	0.140476
Other	fax-1	M06432_2.00	M1	48	34	29.9958	1.13349	0.150566	0.0814526
Piecemeal Regulator	fax-1	M06432_2.00	M4	52	37	32.4955	1.13862	0.127734	0.0416721
Coordinated Regulator	fax-1	M06432_2.00	M5	50	38	31.2456	1.21617	0.034051	0.0365415
Other	fax-1	M06432_2.00	MI	40	28	24.9965	1.12016	0.210614	0.35045
Coordinated Regulator	fax-1	M06432_2.00	RIC	55	44	34.3702	1.28018	0.00569939	0.000238133
Coordinated Regulator	fax-1	M06432_2.00	SAB	55	42	34.3702	1.22199	0.0239128	0.0011431
Piecemeal Regulator	fax-1	M06432_2.00	SIB	48	35	29.9958	1.16683	0.090784	0.00104116
Coordinated Regulator	fax-1	M06432_2.00	URX	88	70	54.9923	1.2729	0.00087788	0.0008357
Coordinated Regulator	nhr-236	M06431_2.00	M2	43	36	25.9147	1.38917	0.00149108	0.000181463
Coordinated Regulator	nhr-236	M06431_2.00	MC	37	28	22.2987	1.25568	0.0405302	0.0161069
Piecemeal Regulator	nhr-236	M06431_2.00	RIP	36	27	21.696	1.24447	0.051219	0.002436
Coordinated Regulator	nhr-216	M00705_2.00	AWA	85	59	41.0702	1.43656	0.000182305	0.00025179
Coordinated Regulator	nhr-239	M06434_2.00	NSM	78	51	29.7847	1.71229	6.53803e-06	0.00926195
Coordinated Regulator	odr-7	M00697_2.00	AWA	85	57	42.4662	1.34225	0.00179312	0.000300215
Other	tra-1	DZ2013_TRA-1	AVG	60	30	14.5118	2.06728	4.80105e-05	0.428517
Other	tra-1	DZ2013_TRA-1	DA	78	43	18.8653	2.27931	1.06934e-07	0.901498
Other	tra-1	DZ2013_TRA-1	PVW	40	17	9.67453	1.75719	0.0103274	0.477124
Coordinated Regulator	F52B5.7	M00625_2.00	PDB	38	15	8.22823	1.82299	0.0120038	0.0247909
Coordinated Regulator	daf-12	M00685_2.00	PVN	43	27	19.3793	1.39324	0.017179	0.00427911
Other	fkh-7	M00792_2.00	PVT	153	85	69.0685	1.23066	0.00789313	0.126811
Other	ceh-33	M00563_2.00	MI	40	17	9.7661	1.74072	0.0112364	0.817678
Coordinated Regulator	mab-23	M00654_2.00	PHC	52	46	40.466	1.13676	0.0427648	1.46963e-05
Piecemeal Regulator	mab-23	M00654_2.00	PVM	84	72	65.3682	1.10145	0.0516142	1.25615e-07
Piecemeal Regulator	ztf-16	M00644_2.00	ASI	254	81	77.373	1.04688	0.33283	0.00036363

## Sheet: Supp.Table.3B.CF_Results
Co-motif signature	TF A motif signature	TF B motif signature	TFA	TFB	motifA_ID	motifB_ID	neuron_class	common genes with a motif match	expected common genes with both motifs	fold change co-enrichment	hypergeometric test for co-enrichment p value (corrected)	Wilcoxon rank sums test p value (motif A) (corrected)	Wilcoxon rank sums test p value (motif B) (corrected)
co-occurence of coordinated regulators	Coordinated Regulator	Coordinated Regulator	unc-62	ceh-18	M02185_2.00	M00681_2.00	ADA	24	6.94732	3.45457	1.09198e-08	0.00112578	5.55971e-05
co-occurence of coordinated regulators	Coordinated Regulator	Coordinated Regulator	unc-62	unc-86	M02185_2.00	M03312_2.00	ADA	28	10.3686	2.70046	5.22971e-08	0.00533336	0.00022904
co-occurence of coordinated regulators	Coordinated Regulator	Coordinated Regulator	unc-62	unc-86	M02185_2.00	M02244_2.00	ADA	22	4.33366	5.07654	7.83742e-11	0.00278764	0.00102941
co-occurence of coordinated regulators	Coordinated Regulator	Coordinated Regulator	unc-62	ceh-14	M02185_2.00	M00435_2.00	ADA	25	8.63962	2.89365	1.32027e-07	0.0151517	0.000155475
co-occurence of coordinated regulators	Coordinated Regulator	Coordinated Regulator	unc-62	lin-31	M02185_2.00	M00665_2.00	ADA	25	8.92479	2.80119	2.43847e-07	0.00262628	0.00207389
co-occurence of coordinated regulators	Coordinated Regulator	Coordinated Regulator	unc-62	ztf-11	M02185_2.00	M00650_2.00	ADA	27	9.66204	2.79444	5.60134e-08	0.00519497	2.13566e-05
co-occurence of coordinated regulators	Coordinated Regulator	Coordinated Regulator	ceh-18	unc-86	M00681_2.00	M03312_2.00	ADA	29	14.9675	1.93753	2.75879e-05	0.00211234	0.000917019
co-occurence of coordinated regulators	Coordinated Regulator	Coordinated Regulator	ceh-18	unc-86	M00681_2.00	M02244_2.00	ADA	22	6.25583	3.51672	4.53396e-08	0.00125428	0.00104335
co-occurence of coordinated regulators	Coordinated Regulator	Coordinated Regulator	ceh-18	ceh-14	M00681_2.00	M00435_2.00	ADA	28	12.4717	2.24508	2.42267e-06	0.00345807	0.000523086
co-occurence of coordinated regulators	Coordinated Regulator	Coordinated Regulator	ceh-18	lin-31	M00681_2.00	M00665_2.00	ADA	29	12.8833	2.25097	1.22087e-06	0.00294715	0.00102597
co-occurence of coordinated regulators	Coordinated Regulator	Coordinated Regulator	ceh-18	ztf-11	M00681_2.00	M00650_2.00	ADA	28	13.9476	2.00752	2.27439e-05	0.00124971	0.000208591
co-occurence of coordinated regulators	Coordinated Regulator	Coordinated Regulator	unc-86	unc-86	M03312_2.00	M02244_2.00	ADA	25	9.33657	2.67764	5.64138e-07	0.00178772	0.00256715
co-occurence of coordinated regulators	Coordinated Regulator	Coordinated Regulator	unc-86	ceh-14	M03312_2.00	M00435_2.00	ADA	37	18.6135	1.98781	8.48418e-08	0.00933484	0.00306869
co-occurence of coordinated regulators	Coordinated Regulator	Coordinated Regulator	unc-86	lin-31	M03312_2.00	M00665_2.00	ADA	34	19.2279	1.76827	1.4753e-05	0.000501579	0.00112632
co-occurence of coordinated regulators	Coordinated Regulator	Coordinated Regulator	unc-86	ztf-11	M03312_2.00	M00650_2.00	ADA	34	20.8162	1.63334	9.97777e-05	0.000231107	6.28628e-05
co-occurence of coordinated regulators	Coordinated Regulator	Coordinated Regulator	unc-86	ceh-14	M02244_2.00	M00435_2.00	ADA	22	7.77969	2.82788	1.7217e-06	0.0144632	0.000207448
co-occurence of coordinated regulators	Coordinated Regulator	Coordinated Regulator	unc-86	lin-31	M02244_2.00	M00665_2.00	ADA	23	8.03647	2.86195	7.01348e-07	0.00133195	0.00163114
co-occurence of coordinated regulators	Coordinated Regulator	Coordinated Regulator	unc-86	ztf-11	M02244_2.00	M00650_2.00	ADA	24	8.70034	2.75851	6.59631e-07	0.00257234	8.84596e-06
co-occurence of coordinated regulators	Coordinated Regulator	Coordinated Regulator	ceh-14	lin-31	M00435_2.00	M00665_2.00	ADA	32	16.0216	1.9973	2.62666e-06	0.0011014	0.00221781
co-occurence of coordinated regulators	Coordinated Regulator	Coordinated Regulator	ceh-14	ztf-11	M00435_2.00	M00650_2.00	ADA	33	17.3451	1.90256	4.48886e-06	0.000717716	0.00138486
co-occurence of coordinated regulators	Coordinated Regulator	Coordinated Regulator	lin-31	ztf-11	M00665_2.00	M00650_2.00	ADA	34	17.9176	1.89758	2.57663e-06	0.00190059	0.000186997
co-occurence of coordinated regulators	Coordinated Regulator	Coordinated Regulator	cey-1	ceh-38	M01903_2.00	M03716_2.00	ADE	20	6.8881	2.90356	9.30245e-06	0.000925356	0.0012321
co-occurence of coordinated regulators	Coordinated Regulator	Coordinated Regulator	cey-1	ceh-48	M01903_2.00	M01905_2.00	ADE	24	6.83973	3.50891	3.11586e-08	0.000308194	0.0268896
co-occurence of coordinated regulators	Coordinated Regulator	Coordinated Regulator	cey-1	ceh-74	M01903_2.00	M01248_2.00	ADE	20	3.20253	6.24506	7.26863e-11	0.00113118	0.0174339
co-occurence of coordinated regulators	Coordinated Regulator	Coordinated Regulator	cey-1	ceh-58	M01903_2.00	M00676_2.00	ADE	23	4.62993	4.96768	1.42987e-10	5.37021e-05	0.000506174
co-occurence of coordinated regulators	Coordinated Regulator	Coordinated Regulator	cey-1	unc-62	M01903_2.00	M02185_2.00	ADE	24	4.50794	5.32394	1.42497e-11	3.92192e-05	8.27853e-05
co-occurence of coordinated regulators	Coordinated Regulator	Coordinated Regulator	cey-1	ceh-43	M01903_2.00	M00423_2.00	ADE	25	5.11928	4.8835	2.65744e-11	0.000261815	1.98786e-05
co-occurence of coordinated regulators	Coordinated Regulator	Coordinated Regulator	cey-1	tbx-2	M01903_2.00	M00830_2.00	ADE	26	4.68601	5.54843	7.03484e-13	0.000743888	7.45538e-06
co-occurence of coordinated regulators	Coordinated Regulator	Coordinated Regulator	cey-1	daf-19	M01903_2.00	M00709_2.00	ADE	15	2.83937	5.28286	1.55999e-07	0.000551883	0.00636791
co-occurence of coordinated regulators	Coordinated Regulator	Coordinated Regulator	cey-1	ztf-3	M01903_2.00	M00640_2.00	ADE	27	4.70705	5.73608	1.11145e-13	0.000367145	4.19636e-05
co-occurence of coordinated regulators	Coordinated Regulator	Coordinated Regulator	cey-1	ztf-9	M01903_2.00	M00636_2.00	ADE	21	3.74236	5.61143	1.37942e-10	0.000310753	0.000737878
co-occurence of coordinated regulators	Coordinated Regulator	Coordinated Regulator	cey-1	die-1	M01903_2.00	M00610_2.00	ADE	28	12.102	2.31366	6.10669e-06	0.000257454	1.40736e-07
co-occurence of coordinated regulators	Coordinated Regulator	Coordinated Regulator	cey-1	syd-9	M01903_2.00	M00646_2.00	ADE	27	5.6514	4.77758	5.44867e-12	6.79269e-05	0.000119194
co-occurence of coordinated regulators	Coordinated Regulator	Coordinated Regulator	cey-1	ztf-11	M01903_2.00	M00650_2.00	ADE	28	9.05023	3.09384	1.93934e-08	0.000257454	9.96188e-08
co-occurence of coordinated regulators	Coordinated Regulator	Coordinated Regulator	ceh-38	ceh-48	M03716_2.00	M01905_2.00	ADE	36	15.6681	2.29767	1.10044e-07	0.00247707	0.00365531
co-occurence of coordinated regulators	Coordinated Regulator	Coordinated Regulator	ceh-38	ceh-58	M03716_2.00	M00676_2.00	ADE	26	10.606	2.45145	5.61787e-06	0.00127753	0.00206162
co-occurence of coordinated regulators	Coordinated Regulator	Coordinated Regulator	ceh-38	unc-62	M03716_2.00	M02185_2.00	ADE	21	10.3265	2.0336	0.000820898	5.72079e-05	0.000189759
co-occurence of coordinated regulators	Coordinated Regulator	Coordinated Regulator	ceh-38	ceh-43	M03716_2.00	M00423_2.00	ADE	27	11.727	2.30239	1.07644e-05	0.00119268	0.000178005
co-occurence of coordinated regulators	Coordinated Regulator	Coordinated Regulator	ceh-38	tbx-2	M03716_2.00	M00830_2.00	ADE	27	10.7345	2.51526	2.09361e-06	0.000388544	0.000137897
co-occurence of coordinated regulators	Coordinated Regulator	Coordinated Regulator	ceh-38	daf-19	M03716_2.00	M00709_2.00	ADE	19	6.50427	2.92116	1.51614e-05	0.00689036	0.0118866
co-occurence of coordinated regulators	Coordinated Regulator	Coordinated Regulator	ceh-38	ztf-3	M03716_2.00	M00640_2.00	ADE	28	10.7826	2.59677	6.54662e-07	0.00696751	0.0255835
co-occurence of coordinated regulators	Coordinated Regulator	Coordinated Regulator	ceh-38	ztf-9	M03716_2.00	M00636_2.00	ADE	23	8.57279	2.68291	5.7994e-06	0.00727437	0.000344923
co-occurence of coordinated regulators	Coordinated Regulator	Coordinated Regulator	ceh-38	die-1	M03716_2.00	M00610_2.00	ADE	40	27.7227	1.44286	0.00180096	0.00277529	1.51735e-07
co-occurence of coordinated regulators	Coordinated Regulator	Coordinated Regulator	ceh-38	syd-9	M03716_2.00	M00646_2.00	ADE	31	12.9459	2.39458	6.64408e-07	0.00438263	0.000506005
co-occurence of coordinated regulators	Coordinated Regulator	Coordinated Regulator	ceh-38	ztf-11	M03716_2.00	M00650_2.00	ADE	37	20.7318	1.7847	3.30554e-05	0.00908283	6.84619e-06
co-occurence of coordinated regulators	Coordinated Regulator	Coordinated Regulator	ceh-48	ceh-74	M01905_2.00	M01248_2.00	ADE	23	7.28466	3.15732	3.95379e-07	0.00292665	0.0268572
co-occurence of coordinated regulators	Coordinated Regulator	Coordinated Regulator	ceh-48	ceh-58	M01905_2.00	M00676_2.00	ADE	32	10.5315	3.03851	1.65854e-09	0.021327	0.000399088
co-occurence of coordinated regulators	Coordinated Regulator	Coordinated Regulator	ceh-48	unc-62	M01905_2.00	M02185_2.00	ADE	26	10.254	2.53559	3.06374e-06	0.00777527	5.45699e-05
co-occurence of coordinated regulators	Coordinated Regulator	Coordinated Regulator	ceh-48	tbx-2	M01905_2.00	M00830_2.00	ADE	32	10.6591	3.00214	2.19733e-09	0.0227584	1.33245e-05
co-occurence of coordinated regulators	Coordinated Regulator	Coordinated Regulator	ceh-48	daf-19	M01905_2.00	M00709_2.00	ADE	20	6.45859	3.09665	3.65589e-06	0.0136275	0.00396273
co-occurence of coordinated regulators	Coordinated Regulator	Coordinated Regulator	ceh-48	ztf-3	M01905_2.00	M00640_2.00	ADE	33	10.7069	3.08212	5.58056e-10	0.0362868	0.000929965
co-occurence of coordinated regulators	Coordinated Regulator	Coordinated Regulator	ceh-48	ztf-9	M01905_2.00	M00636_2.00	ADE	26	8.51259	3.0543	9.74206e-08	0.0173347	0.00308329
co-occurence of coordinated regulators	Coordinated Regulator	Coordinated Regulator	ceh-48	die-1	M01905_2.00	M00610_2.00	ADE	44	27.528	1.59837	4.13129e-05	0.0171811	2.29174e-08
co-occurence of coordinated regulators	Coordinated Regulator	Coordinated Regulator	ceh-48	syd-9	M01905_2.00	M00646_2.00	ADE	34	12.855	2.64489	1.14306e-08	0.0253807	0.000165409
co-occurence of coordinated regulators	Coordinated Regulator	Coordinated Regulator	ceh-74	unc-62	M01248_2.00	M02185_2.00	ADE	20	4.80118	4.16564	4.28779e-08	0.027082	5.62009e-05
co-occurence of coordinated regulators	Coordinated Regulator	Coordinated Regulator	ceh-74	tbx-2	M01248_2.00	M00830_2.00	ADE	24	4.99084	4.80881	9.60481e-11	0.0285704	7.45453e-06
co-occurence of coordinated regulators	Coordinated Regulator	Coordinated Regulator	ceh-74	ztf-9	M01248_2.00	M00636_2.00	ADE	19	3.9858	4.76692	1.34805e-08	0.00749795	5.87475e-06
co-occurence of coordinated regulators	Coordinated Regulator	Coordinated Regulator	ceh-74	die-1	M01248_2.00	M00610_2.00	ADE	28	12.8893	2.17235	1.99687e-05	0.0453273	1.37024e-06
co-occurence of coordinated regulators	Coordinated Regulator	Coordinated Regulator	ceh-74	syd-9	M01248_2.00	M00646_2.00	ADE	25	6.01903	4.1535	6.071e-10	0.0244978	1.01446e-05
co-occurence of coordinated regulators	Coordinated Regulator	Coordinated Regulator	ceh-74	ztf-11	M01248_2.00	M00650_2.00	ADE	27	9.63895	2.80113	2.70664e-07	0.0410111	8.27549e-07
co-occurence of coordinated regulators	Coordinated Regulator	Coordinated Regulator	ceh-58	unc-62	M00676_2.00	M02185_2.00	ADE	26	6.94111	3.7458	1.91362e-09	0.000656652	0.00308113
co-occurence of coordinated regulators	Coordinated Regulator	Coordinated Regulator	ceh-58	ceh-43	M00676_2.00	M00423_2.00	ADE	35	7.88243	4.44026	6.75882e-15	0.00159747	0.000248867
co-occurence of coordinated regulators	Coordinated Regulator	Coordinated Regulator	ceh-58	tbx-2	M00676_2.00	M00830_2.00	ADE	32	7.2153	4.43502	1.75412e-13	0.000793461	4.9312e-06
co-occurence of coordinated regulators	Coordinated Regulator	Coordinated Regulator	ceh-58	daf-19	M00676_2.00	M00709_2.00	ADE	16	4.37193	3.65971	5.67838e-06	0.000161537	0.0103711
co-occurence of coordinated regulators	Coordinated Regulator	Coordinated Regulator	ceh-58	ztf-3	M00676_2.00	M00640_2.00	ADE	29	7.24769	4.00128	3.61553e-11	0.000218839	0.000121771
co-occurence of coordinated regulators	Coordinated Regulator	Coordinated Regulator	ceh-58	ztf-9	M00676_2.00	M00636_2.00	ADE	22	5.76231	3.81791	3.38286e-08	0.000245813	3.20104e-05
co-occurence of coordinated regulators	Coordinated Regulator	Coordinated Regulator	ceh-58	die-1	M00676_2.00	M00610_2.00	ADE	41	18.6341	2.20026	1.86438e-08	0.00497497	1.67012e-06
co-occurence of coordinated regulators	Coordinated Regulator	Coordinated Regulator	ceh-58	syd-9	M00676_2.00	M00646_2.00	ADE	28	8.70176	3.21774	8.65987e-09	0.000121004	0.00165242
co-occurence of coordinated regulators	Coordinated Regulator	Coordinated Regulator	ceh-58	ztf-11	M00676_2.00	M00650_2.00	ADE	37	13.9351	2.65516	1.36703e-09	0.00170363	1.27623e-06
co-occurence of coordinated regulators	Coordinated Regulator	Coordinated Regulator	unc-62	ceh-43	M02185_2.00	M00423_2.00	ADE	25	7.67474	3.25744	5.821e-08	0.00448687	1.39011e-05
co-occurence of coordinated regulators	Coordinated Regulator	Coordinated Regulator	unc-62	tbx-2	M02185_2.00	M00830_2.00	ADE	25	7.0252	3.55862	1.12652e-08	0.000135639	1.10595e-06
co-occurence of coordinated regulators	Coordinated Regulator	Coordinated Regulator	unc-62	daf-19	M02185_2.00	M00709_2.00	ADE	16	4.25674	3.75874	4.09832e-06	0.00458319	0.0435725
co-occurence of coordinated regulators	Coordinated Regulator	Coordinated Regulator	unc-62	ztf-3	M02185_2.00	M00640_2.00	ADE	25	7.05673	3.54272	1.22221e-08	0.000251935	1.63499e-05
co-occurence of coordinated regulators	Coordinated Regulator	Coordinated Regulator	unc-62	ztf-9	M02185_2.00	M00636_2.00	ADE	22	5.61049	3.92123	2.16961e-08	0.000813397	0.000122265
co-occurence of coordinated regulators	Coordinated Regulator	Coordinated Regulator	unc-62	die-1	M02185_2.00	M00610_2.00	ADE	31	18.1432	1.70863	0.000587305	0.000812226	7.90724e-07
co-occurence of coordinated regulators	Coordinated Regulator	Coordinated Regulator	unc-62	syd-9	M02185_2.00	M00646_2.00	ADE	26	8.47249	3.06876	8.90599e-08	8.94558e-05	4.97421e-05
co-occurence of coordinated regulators	Coordinated Regulator	Coordinated Regulator	unc-62	ztf-11	M02185_2.00	M00650_2.00	ADE	28	13.568	2.06368	5.12782e-05	6.2075e-05	2.0331e-07
co-occurence of coordinated regulators	Coordinated Regulator	Coordinated Regulator	ceh-43	tbx-2	M00423_2.00	M00830_2.00	ADE	32	7.97792	4.01107	2.08869e-12	3.42971e-06	6.93578e-06
co-occurence of coordinated regulators	Coordinated Regulator	Coordinated Regulator	ceh-43	daf-19	M00423_2.00	M00709_2.00	ADE	17	4.83401	3.51675	4.60266e-06	0.000134539	0.00467941
co-occurence of coordinated regulators	Coordinated Regulator	Coordinated Regulator	ceh-43	ztf-3	M00423_2.00	M00640_2.00	ADE	30	8.01372	3.74358	6.5674e-11	3.91249e-06	0.000620997
co-occurence of coordinated regulators	Coordinated Regulator	Coordinated Regulator	ceh-43	ztf-9	M00423_2.00	M00636_2.00	ADE	23	6.37135	3.60991	4.02517e-08	2.79209e-05	0.000103158
co-occurence of coordinated regulators	Coordinated Regulator	Coordinated Regulator	ceh-43	die-1	M00423_2.00	M00610_2.00	ADE	41	20.6036	1.98994	3.30277e-07	0.000109486	1.76354e-06
co-occurence of coordinated regulators	Coordinated Regulator	Coordinated Regulator	ceh-43	syd-9	M00423_2.00	M00646_2.00	ADE	30	9.62148	3.11802	3.96208e-09	3.3467e-06	0.00365926
co-occurence of coordinated regulators	Coordinated Regulator	Coordinated Regulator	ceh-43	ztf-11	M00423_2.00	M00650_2.00	ADE	38	15.408	2.46626	5.06885e-09	7.12316e-05	2.22321e-07
co-occurence of coordinated regulators	Coordinated Regulator	Coordinated Regulator	tbx-2	daf-19	M00830_2.00	M00709_2.00	ADE	17	4.42489	3.8419	1.47676e-06	0.00294865	0.00243468
co-occurence of coordinated regulators	Coordinated Regulator	Coordinated Regulator	tbx-2	ztf-3	M00830_2.00	M00640_2.00	ADE	33	7.33549	4.49868	4.18326e-14	3.82297e-06	0.000197602
co-occurence of coordinated regulators	Coordinated Regulator	Coordinated Regulator	tbx-2	ztf-9	M00830_2.00	M00636_2.00	ADE	26	5.83212	4.45807	5.97814e-11	7.11842e-06	0.000660651
co-occurence of coordinated regulators	Coordinated Regulator	Coordinated Regulator	tbx-2	die-1	M00830_2.00	M00610_2.00	ADE	41	18.8599	2.17393	2.64487e-08	1.65288e-06	3.01645e-08
co-occurence of coordinated regulators	Coordinated Regulator	Coordinated Regulator	tbx-2	syd-9	M00830_2.00	M00646_2.00	ADE	33	8.80717	3.74695	4.45833e-12	5.52943e-06	0.000372497
co-occurence of coordinated regulators	Coordinated Regulator	Coordinated Regulator	tbx-2	ztf-11	M00830_2.00	M00650_2.00	ADE	39	14.1039	2.76519	1.00521e-10	2.4151e-06	1.20834e-08
co-occurence of coordinated regulators	Coordinated Regulator	Coordinated Regulator	daf-19	ztf-3	M00709_2.00	M00640_2.00	ADE	19	4.44475	4.2747	6.76301e-08	0.00219665	0.000651745
co-occurence of coordinated regulators	Coordinated Regulator	Coordinated Regulator	daf-19	die-1	M00709_2.00	M00610_2.00	ADE	23	11.4277	2.01266	0.000482987	0.00378283	2.44726e-05
co-occurence of coordinated regulators	Coordinated Regulator	Coordinated Regulator	daf-19	syd-9	M00709_2.00	M00646_2.00	ADE	18	5.33648	3.37301	4.02455e-06	0.0118322	0.000273772
co-occurence of coordinated regulators	Coordinated Regulator	Coordinated Regulator	daf-19	ztf-11	M00709_2.00	M00650_2.00	ADE	21	8.54592	2.45731	6.06842e-05	0.00113542	3.02652e-06
co-occurence of coordinated regulators	Coordinated Regulator	Coordinated Regulator	ztf-3	ztf-9	M00640_2.00	M00636_2.00	ADE	28	5.85829	4.77955	1.92105e-12	0.000676208	0.00770879
co-occurence of coordinated regulators	Coordinated Regulator	Coordinated Regulator	ztf-3	die-1	M00640_2.00	M00610_2.00	ADE	41	18.9445	2.16421	3.00698e-08	0.0023545	1.49582e-08
co-occurence of coordinated regulators	Coordinated Regulator	Coordinated Regulator	ztf-3	syd-9	M00640_2.00	M00646_2.00	ADE	35	8.8467	3.95628	1.60481e-13	0.0017129	0.000375727
co-occurence of coordinated regulators	Coordinated Regulator	Coordinated Regulator	ztf-3	ztf-11	M00640_2.00	M00650_2.00	ADE	37	14.1672	2.61166	2.12559e-09	0.000448151	2.77328e-08
co-occurence of coordinated regulators	Coordinated Regulator	Coordinated Regulator	ztf-9	die-1	M00636_2.00	M00610_2.00	ADE	31	15.0619	2.05817	1.58096e-05	0.000890646	1.25108e-06
co-occurence of coordinated regulators	Coordinated Regulator	Coordinated Regulator	ztf-9	syd-9	M00636_2.00	M00646_2.00	ADE	27	7.03362	3.83871	5.09398e-10	0.0010132	0.00184015
co-occurence of coordinated regulators	Coordinated Regulator	Coordinated Regulator	ztf-9	ztf-11	M00636_2.00	M00650_2.00	ADE	29	11.2637	2.57464	4.41889e-07	0.000694944	1.00875e-06
co-occurence of coordinated regulators	Coordinated Regulator	Coordinated Regulator	die-1	syd-9	M00610_2.00	M00646_2.00	ADE	42	22.7453	1.84654	1.64749e-06	5.67193e-07	0.000860429
co-occurence of coordinated regulators	Coordinated Regulator	Coordinated Regulator	die-1	ztf-11	M00610_2.00	M00650_2.00	ADE	54	36.4246	1.48251	6.02012e-06	3.21942e-08	1.37704e-07
co-occurence of coordinated regulators	Coordinated Regulator	Coordinated Regulator	syd-9	ztf-11	M00646_2.00	M00650_2.00	ADE	40	17.0095	2.35162	5.16502e-09	0.00153406	3.7098e-08
co-occurence of coordinated regulators	Coordinated Regulator	Coordinated Regulator	2020-06-01	fos-1	M00599_2.00	M01144_2.00	ADF	45	9.07813	4.95697	5.28817e-19	0.00315763	0.00845593
co-occurence of coordinated regulators	Coordinated Regulator	Coordinated Regulator	2020-06-01	ceh-48	M00599_2.00	M01905_2.00	ADF	41	17.0091	2.41048	3.91985e-08	0.0114691	0.00434555
co-occurence of coordinated regulators	Coordinated Regulator	Coordinated Regulator	2020-06-01	ceh-74	M00599_2.00	M01248_2.00	ADF	35	7.96407	4.39474	2.12025e-13	0.0197242	0.028283
co-occurence of coordinated regulators	Coordinated Regulator	Coordinated Regulator	2020-06-01	ceh-58	M00599_2.00	M00676_2.00	ADF	41	11.5137	3.56097	6.64618e-13	0.00367579	1.59377e-06
co-occurence of coordinated regulators	Coordinated Regulator	Coordinated Regulator	2020-06-01	ceh-23	M00599_2.00	M00671_2.00	ADF	47	14.767	3.18277	3.30009e-13	0.00278286	0.00840759
co-occurence of coordinated regulators	Coordinated Regulator	Coordinated Regulator	2020-06-01	ceh-19	M00599_2.00	M02180_2.00	ADF	37	13.7018	2.70038	1.42816e-08	0.000555511	9.38507e-06
co-occurence of coordinated regulators	Coordinated Regulator	Coordinated Regulator	2020-06-01	ceh-9	M00599_2.00	M03847_2.00	ADF	39	13.2694	2.9391	5.45572e-10	0.00366749	0.000702097
co-occurence of coordinated regulators	Coordinated Regulator	Coordinated Regulator	2020-06-01	ztf-3	M00599_2.00	M00640_2.00	ADF	39	11.7055	3.33176	1.7907e-11	0.0121406	2.16442e-06
co-occurence of coordinated regulators	Coordinated Regulator	Coordinated Regulator	2020-06-01	ztf-9	M00599_2.00	M00636_2.00	ADF	32	9.30653	3.43845	8.21425e-10	0.0275426	0.00290911
co-occurence of coordinated regulators	Coordinated Regulator	Coordinated Regulator	2020-06-01	die-1	M00599_2.00	M00610_2.00	ADF	52	30.0954	1.72784	9.07444e-06	0.00451141	1.13494e-06
co-occurence of coordinated regulators	Coordinated Regulator	Coordinated Regulator	2020-06-01	egl-43	M00599_2.00	M00611_2.00	ADF	26	8.04078	3.23352	1.19128e-07	0.0111537	0.00226051
co-occurence of coordinated regulators	Coordinated Regulator	Coordinated Regulator	2020-06-01	ztf-11	M00599_2.00	M00650_2.00	ADF	50	22.5062	2.22161	7.95558e-09	0.00507199	4.60417e-07
co-occurence of coordinated regulators	Coordinated Regulator	Coordinated Regulator	2020-06-01	dmd-6	M00599_2.00	M00655_2.00	ADF	49	25.0621	1.95515	5.96949e-07	0.00197557	4.20587e-08
co-occurence of coordinated regulators	Coordinated Regulator	Coordinated Regulator	2020-06-01	nhr-67	M00599_2.00	M02408_2.00	ADF	35	10.5705	3.31109	2.86952e-10	0.0013823	0.0048051
co-occurence of coordinated regulators	Coordinated Regulator	Coordinated Regulator	2020-06-01	nhr-36	M00599_2.00	M02418_2.00	ADF	32	11.4353	2.79836	7.96908e-08	0.00118005	0.000161115
co-occurence of coordinated regulators	Coordinated Regulator	Coordinated Regulator	fos-1	ceh-48	M01144_2.00	M01905_2.00	ADF	37	14.3427	2.57971	4.41417e-08	0.0254846	0.0481896
co-occurence of coordinated regulators	Coordinated Regulator	Coordinated Regulator	fos-1	ceh-74	M01144_2.00	M01248_2.00	ADF	29	6.71561	4.31829	4.53676e-11	0.0128324	0.0206253
co-occurence of coordinated regulators	Coordinated Regulator	Coordinated Regulator	fos-1	ceh-58	M01144_2.00	M00676_2.00	ADF	38	9.70883	3.91396	4.22209e-13	0.00871287	1.12484e-05
co-occurence of coordinated regulators	Coordinated Regulator	Coordinated Regulator	fos-1	ceh-23	M01144_2.00	M00671_2.00	ADF	41	12.4521	3.29261	6.59958e-12	0.00662501	0.00341669
co-occurence of coordinated regulators	Coordinated Regulator	Coordinated Regulator	fos-1	ceh-19	M01144_2.00	M02180_2.00	ADF	33	11.5539	2.85619	3.02195e-08	0.00313942	9.64915e-06
co-occurence of coordinated regulators	Coordinated Regulator	Coordinated Regulator	fos-1	ceh-9	M01144_2.00	M03847_2.00	ADF	35	11.1893	3.128	1.16754e-09	0.0130066	0.0013106
co-occurence of coordinated regulators	Coordinated Regulator	Coordinated Regulator	fos-1	ztf-3	M01144_2.00	M00640_2.00	ADF	35	9.87054	3.5459	5.18019e-11	0.00884614	1.8122e-05
co-occurence of coordinated regulators	Coordinated Regulator	Coordinated Regulator	fos-1	ztf-9	M01144_2.00	M00636_2.00	ADF	26	7.84762	3.3131	7.5973e-08	0.0487334	0.013873
co-occurence of coordinated regulators	Coordinated Regulator	Coordinated Regulator	fos-1	die-1	M01144_2.00	M00610_2.00	ADF	47	25.3776	1.85203	5.26196e-06	0.00772868	2.21712e-06
co-occurence of coordinated regulators	Coordinated Regulator	Coordinated Regulator	fos-1	egl-43	M01144_2.00	M00611_2.00	ADF	24	6.7803	3.53967	8.09977e-08	0.0377013	0.00457869
co-occurence of coordinated regulators	Coordinated Regulator	Coordinated Regulator	fos-1	ztf-11	M01144_2.00	M00650_2.00	ADF	44	18.9781	2.31846	3.02089e-08	0.00258189	6.10853e-08
co-occurence of coordinated regulators	Coordinated Regulator	Coordinated Regulator	fos-1	dmd-6	M01144_2.00	M00655_2.00	ADF	44	21.1333	2.08202	5.89977e-07	0.00306327	1.82618e-08
co-occurence of coordinated regulators	Coordinated Regulator	Coordinated Regulator	fos-1	nhr-67	M01144_2.00	M02408_2.00	ADF	32	8.91348	3.59007	3.02977e-10	0.0146773	0.0055148
co-occurence of coordinated regulators	Coordinated Regulator	Coordinated Regulator	fos-1	nhr-36	M01144_2.00	M02418_2.00	ADF	29	9.64267	3.00747	8.68482e-08	0.0118728	0.000211966
co-occurence of coordinated regulators	Coordinated Regulator	Coordinated Regulator	ceh-48	ceh-74	M01905_2.00	M01248_2.00	ADF	34	12.5826	2.70215	6.33516e-08	0.018019	0.00223497
co-occurence of coordinated regulators	Coordinated Regulator	Coordinated Regulator	ceh-48	ceh-58	M01905_2.00	M00676_2.00	ADF	52	18.1908	2.85859	5.04809e-13	0.0247316	7.90511e-05
co-occurence of coordinated regulators	Coordinated Regulator	Coordinated Regulator	ceh-48	ceh-23	M01905_2.00	M00671_2.00	ADF	49	23.3307	2.10024	6.96112e-08	0.00297413	9.72913e-05
co-occurence of coordinated regulators	Coordinated Regulator	Coordinated Regulator	ceh-48	ceh-19	M01905_2.00	M02180_2.00	ADF	50	21.6477	2.30972	2.2824e-09	0.020456	0.000560834
co-occurence of coordinated regulators	Coordinated Regulator	Coordinated Regulator	ceh-48	ceh-9	M01905_2.00	M03847_2.00	ADF	50	20.9646	2.38498	8.07051e-10	0.0192942	0.000890412
co-occurence of coordinated regulators	Coordinated Regulator	Coordinated Regulator	ceh-48	ztf-3	M01905_2.00	M00640_2.00	ADF	50	18.4938	2.70361	1.209e-11	0.0238501	2.48188e-05
co-occurence of coordinated regulators	Coordinated Regulator	Coordinated Regulator	ceh-48	ztf-9	M01905_2.00	M00636_2.00	ADF	38	14.7036	2.58441	2.6129e-08	0.019355	0.0153595
co-occurence of coordinated regulators	Coordinated Regulator	Coordinated Regulator	ceh-48	die-1	M01905_2.00	M00610_2.00	ADF	69	47.5483	1.45116	4.29764e-05	0.0196707	5.0685e-09
co-occurence of coordinated regulators	Coordinated Regulator	Coordinated Regulator	ceh-48	ztf-11	M01905_2.00	M00650_2.00	ADF	67	35.5579	1.88425	2.4149e-09	0.0181334	2.05115e-08
co-occurence of coordinated regulators	Coordinated Regulator	Coordinated Regulator	ceh-48	dmd-6	M01905_2.00	M00655_2.00	ADF	66	39.596	1.66683	5.0622e-07	0.0109798	3.01994e-07
co-occurence of coordinated regulators	Coordinated Regulator	Coordinated Regulator	ceh-48	nhr-67	M01905_2.00	M02408_2.00	ADF	42	16.7006	2.51488	7.80006e-09	0.0238387	0.00907163
co-occurence of coordinated regulators	Coordinated Regulator	Coordinated Regulator	ceh-48	nhr-36	M01905_2.00	M02418_2.00	ADF	43	18.0668	2.38005	2.26029e-08	0.00412115	0.000145793
co-occurence of coordinated regulators	Coordinated Regulator	Coordinated Regulator	ceh-74	ceh-58	M01248_2.00	M00676_2.00	ADF	34	8.51736	3.99185	5.58532e-12	0.0127923	2.90807e-05
co-occurence of coordinated regulators	Coordinated Regulator	Coordinated Regulator	ceh-74	ceh-23	M01248_2.00	M00671_2.00	ADF	36	10.924	3.2955	1.69526e-10	0.0119023	0.00175996
co-occurence of coordinated regulators	Coordinated Regulator	Coordinated Regulator	ceh-74	ceh-19	M01248_2.00	M02180_2.00	ADF	34	10.136	3.35439	3.99029e-10	0.00190429	3.53226e-05
co-occurence of coordinated regulators	Coordinated Regulator	Coordinated Regulator	ceh-74	ceh-9	M01248_2.00	M03847_2.00	ADF	33	9.81612	3.36182	7.22232e-10	0.00862706	0.0115174
co-occurence of coordinated regulators	Coordinated Regulator	Coordinated Regulator	ceh-74	ztf-3	M01248_2.00	M00640_2.00	ADF	35	8.65923	4.04193	1.86191e-12	0.00146444	2.13258e-05
co-occurence of coordinated regulators	Coordinated Regulator	Coordinated Regulator	ceh-74	ztf-9	M01248_2.00	M00636_2.00	ADF	32	6.88457	4.64808	6.8415e-13	0.000923329	0.00107861
co-occurence of coordinated regulators	Coordinated Regulator	Coordinated Regulator	ceh-74	die-1	M01248_2.00	M00610_2.00	ADF	45	22.2633	2.02126	9.24377e-07	0.00931483	1.79952e-07
co-occurence of coordinated regulators	Coordinated Regulator	Coordinated Regulator	ceh-74	egl-43	M01248_2.00	M00611_2.00	ADF	25	5.94823	4.20293	1.82373e-09	0.0420558	0.000187318
co-occurence of coordinated regulators	Coordinated Regulator	Coordinated Regulator	ceh-74	ztf-11	M01248_2.00	M00650_2.00	ADF	45	16.6491	2.70285	2.04827e-10	0.00931483	1.90677e-05
co-occurence of coordinated regulators	Coordinated Regulator	Coordinated Regulator	ceh-74	dmd-6	M01248_2.00	M00655_2.00	ADF	44	18.5398	2.37327	1.55652e-08	0.00850658	5.89003e-09
co-occurence of coordinated regulators	Coordinated Regulator	Coordinated Regulator	ceh-74	nhr-67	M01248_2.00	M02408_2.00	ADF	28	7.81962	3.58074	4.76639e-09	0.00801682	0.00817685
co-occurence of coordinated regulators	Coordinated Regulator	Coordinated Regulator	ceh-74	nhr-36	M01248_2.00	M02418_2.00	ADF	32	8.45933	3.78281	9.00108e-11	0.000145607	5.44028e-05
co-occurence of coordinated regulators	Coordinated Regulator	Coordinated Regulator	ceh-58	ceh-23	M00676_2.00	M00671_2.00	ADF	51	15.7929	3.22929	1.15674e-14	9.26959e-05	0.00169517
co-occurence of coordinated regulators	Coordinated Regulator	Coordinated Regulator	ceh-58	ceh-19	M00676_2.00	M02180_2.00	ADF	52	14.6537	3.5486	1.60878e-16	0.00235452	6.04788e-05
co-occurence of coordinated regulators	Coordinated Regulator	Coordinated Regulator	ceh-58	ceh-9	M00676_2.00	M03847_2.00	ADF	46	14.1913	3.24143	3.58183e-13	0.000147686	0.00441138
co-occurence of coordinated regulators	Coordinated Regulator	Coordinated Regulator	ceh-58	ztf-3	M00676_2.00	M00640_2.00	ADF	43	12.5187	3.43485	4.66174e-13	5.12355e-05	1.54361e-05
co-occurence of coordinated regulators	Coordinated Regulator	Coordinated Regulator	ceh-58	ztf-9	M00676_2.00	M00636_2.00	ADF	36	9.95308	3.61697	1.55776e-11	0.00012428	0.00154821
co-occurence of coordinated regulators	Coordinated Regulator	Coordinated Regulator	ceh-58	die-1	M00676_2.00	M00610_2.00	ADF	65	32.1862	2.0195	3.17651e-10	0.00148528	2.69162e-07
co-occurence of coordinated regulators	Coordinated Regulator	Coordinated Regulator	ceh-58	egl-43	M00676_2.00	M00611_2.00	ADF	29	8.59941	3.37233	8.48367e-09	0.000372744	0.000541116
co-occurence of coordinated regulators	Coordinated Regulator	Coordinated Regulator	ceh-58	ztf-11	M00676_2.00	M00650_2.00	ADF	62	24.0698	2.57585	5.28578e-14	0.000705048	1.92737e-07
co-occurence of coordinated regulators	Coordinated Regulator	Coordinated Regulator	ceh-58	dmd-6	M00676_2.00	M00655_2.00	ADF	64	26.8032	2.38777	4.1752e-13	0.00135943	7.2822e-08
co-occurence of coordinated regulators	Coordinated Regulator	Coordinated Regulator	ceh-58	nhr-67	M00676_2.00	M02408_2.00	ADF	41	11.3049	3.62675	3.87769e-13	9.38335e-05	0.000967234
co-occurence of coordinated regulators	Coordinated Regulator	Coordinated Regulator	ceh-58	nhr-36	M00676_2.00	M02418_2.00	ADF	39	12.2297	3.18895	5.93606e-11	0.000356719	0.000126918
co-occurence of coordinated regulators	Coordinated Regulator	Coordinated Regulator	ceh-23	ceh-19	M00671_2.00	M02180_2.00	ADF	49	18.7942	2.60719	7.15437e-11	0.00428793	0.000180037
co-occurence of coordinated regulators	Coordinated Regulator	Coordinated Regulator	ceh-23	ceh-9	M00671_2.00	M03847_2.00	ADF	50	18.2011	2.74709	7.01877e-12	0.00112412	0.00530802
co-occurence of coordinated regulators	Coordinated Regulator	Coordinated Regulator	ceh-23	ztf-3	M00671_2.00	M00640_2.00	ADF	44	16.056	2.74041	2.34544e-10	0.000628887	4.11241e-05
co-occurence of coordinated regulators	Coordinated Regulator	Coordinated Regulator	ceh-23	die-1	M00671_2.00	M00610_2.00	ADF	66	41.2807	1.59881	2.48171e-06	0.0455272	7.17101e-08
co-occurence of coordinated regulators	Coordinated Regulator	Coordinated Regulator	ceh-23	egl-43	M00671_2.00	M00611_2.00	ADF	28	11.0292	2.53871	3.6888e-06	0.00463326	0.00235858
co-occurence of coordinated regulators	Coordinated Regulator	Coordinated Regulator	ceh-23	ztf-11	M00671_2.00	M00650_2.00	ADF	63	30.8708	2.04076	5.21808e-10	0.0164947	8.54415e-09
co-occurence of coordinated regulators	Coordinated Regulator	Coordinated Regulator	ceh-23	dmd-6	M00671_2.00	M00655_2.00	ADF	63	34.3766	1.83264	3.64895e-08	0.0189541	1.07262e-08
co-occurence of coordinated regulators	Coordinated Regulator	Coordinated Regulator	ceh-23	nhr-67	M00671_2.00	M02408_2.00	ADF	43	14.4992	2.96569	3.99004e-11	0.0013987	0.00529962
co-occurence of coordinated regulators	Coordinated Regulator	Coordinated Regulator	ceh-23	nhr-36	M00671_2.00	M02418_2.00	ADF	43	15.6853	2.74142	4.04329e-10	0.00173836	0.00263525
co-occurence of coordinated regulators	Coordinated Regulator	Coordinated Regulator	ceh-19	ceh-9	M02180_2.00	M03847_2.00	ADF	46	16.8881	2.72381	9.24813e-11	0.00191594	0.0147708
co-occurence of coordinated regulators	Coordinated Regulator	Coordinated Regulator	ceh-19	ztf-3	M02180_2.00	M00640_2.00	ADF	44	14.8977	2.95347	2.4684e-11	8.17582e-05	2.96834e-06
co-occurence of coordinated regulators	Coordinated Regulator	Coordinated Regulator	ceh-19	ztf-9	M02180_2.00	M00636_2.00	ADF	37	11.8445	3.1238	3.59147e-10	0.00383545	0.00421969
co-occurence of coordinated regulators	Coordinated Regulator	Coordinated Regulator	ceh-19	die-1	M02180_2.00	M00610_2.00	ADF	66	38.3028	1.72311	1.37523e-07	0.00853113	8.0854e-08
co-occurence of coordinated regulators	Coordinated Regulator	Coordinated Regulator	ceh-19	egl-43	M02180_2.00	M00611_2.00	ADF	34	10.2336	3.32239	5.02983e-10	0.00219449	0.008404
co-occurence of coordinated regulators	Coordinated Regulator	Coordinated Regulator	ceh-19	ztf-11	M02180_2.00	M00650_2.00	ADF	65	28.6439	2.26925	2.15705e-12	0.00658553	1.24942e-08
co-occurence of coordinated regulators	Coordinated Regulator	Coordinated Regulator	ceh-19	dmd-6	M02180_2.00	M00655_2.00	ADF	64	31.8968	2.00647	6.61027e-10	0.00498039	2.654e-09
co-occurence of coordinated regulators	Coordinated Regulator	Coordinated Regulator	ceh-19	nhr-67	M02180_2.00	M02408_2.00	ADF	37	13.4532	2.75027	9.08582e-09	0.000267517	0.00418629
co-occurence of coordinated regulators	Coordinated Regulator	Coordinated Regulator	ceh-19	nhr-36	M02180_2.00	M02418_2.00	ADF	42	14.5538	2.88584	1.59446e-10	0.000366616	0.00190906
co-occurence of coordinated regulators	Coordinated Regulator	Coordinated Regulator	ceh-9	ztf-3	M03847_2.00	M00640_2.00	ADF	42	14.4276	2.91108	1.23868e-10	0.0013921	0.000127925
co-occurence of coordinated regulators	Coordinated Regulator	Coordinated Regulator	ceh-9	ztf-9	M03847_2.00	M00636_2.00	ADF	35	11.4708	3.05124	2.13355e-09	0.0345668	0.00353065
co-occurence of coordinated regulators	Coordinated Regulator	Coordinated Regulator	ceh-9	die-1	M03847_2.00	M00610_2.00	ADF	61	37.0941	1.64447	3.68504e-06	0.00397826	1.26475e-07
co-occurence of coordinated regulators	Coordinated Regulator	Coordinated Regulator	ceh-9	egl-43	M03847_2.00	M00611_2.00	ADF	31	9.91067	3.12794	1.23476e-08	0.00768669	0.00383951
co-occurence of coordinated regulators	Coordinated Regulator	Coordinated Regulator	ceh-9	ztf-11	M03847_2.00	M00650_2.00	ADF	59	27.74	2.12689	6.4906e-10	0.00996291	3.3359e-08
co-occurence of coordinated regulators	Coordinated Regulator	Coordinated Regulator	ceh-9	dmd-6	M03847_2.00	M00655_2.00	ADF	59	30.8903	1.90999	3.50868e-08	0.0023388	9.24958e-08
co-occurence of coordinated regulators	Coordinated Regulator	Coordinated Regulator	ceh-9	nhr-67	M03847_2.00	M02408_2.00	ADF	39	13.0287	2.99339	3.33232e-10	0.000535085	0.0250617
co-occurence of coordinated regulators	Coordinated Regulator	Coordinated Regulator	ceh-9	nhr-36	M03847_2.00	M02418_2.00	ADF	41	14.0946	2.90892	2.27518e-10	0.0083851	0.00356348
co-occurence of coordinated regulators	Coordinated Regulator	Coordinated Regulator	ztf-3	ztf-9	M00640_2.00	M00636_2.00	ADF	35	10.1189	3.45888	9.65588e-11	4.32299e-05	0.000461243
co-occurence of coordinated regulators	Coordinated Regulator	Coordinated Regulator	ztf-3	die-1	M00640_2.00	M00610_2.00	ADF	57	32.7224	1.74193	1.68417e-06	3.08076e-05	4.9131e-09
co-occurence of coordinated regulators	Coordinated Regulator	Coordinated Regulator	ztf-3	egl-43	M00640_2.00	M00611_2.00	ADF	28	8.74264	3.20269	4.4105e-08	0.000383607	0.00358591
co-occurence of coordinated regulators	Coordinated Regulator	Coordinated Regulator	ztf-3	ztf-11	M00640_2.00	M00650_2.00	ADF	57	24.4707	2.32932	5.4578e-11	6.31577e-05	1.14798e-08
co-occurence of coordinated regulators	Coordinated Regulator	Coordinated Regulator	ztf-3	dmd-6	M00640_2.00	M00655_2.00	ADF	55	27.2497	2.01837	2.3709e-08	9.86982e-06	4.17832e-08
co-occurence of coordinated regulators	Coordinated Regulator	Coordinated Regulator	ztf-3	nhr-67	M00640_2.00	M02408_2.00	ADF	40	11.4932	3.48032	2.64172e-12	0.000165749	0.0146053
co-occurence of coordinated regulators	Coordinated Regulator	Coordinated Regulator	ztf-3	nhr-36	M00640_2.00	M02418_2.00	ADF	41	12.4334	3.29756	6.30878e-12	3.12078e-05	9.41327e-05
co-occurence of coordinated regulators	Coordinated Regulator	Coordinated Regulator	ztf-9	die-1	M00636_2.00	M00610_2.00	ADF	48	26.0161	1.84501	4.3328e-06	0.0198294	3.06185e-07
co-occurence of coordinated regulators	Coordinated Regulator	Coordinated Regulator	ztf-9	ztf-11	M00636_2.00	M00650_2.00	ADF	46	19.4555	2.36437	6.99495e-09	0.0165576	1.87979e-06
co-occurence of coordinated regulators	Coordinated Regulator	Coordinated Regulator	ztf-9	dmd-6	M00636_2.00	M00655_2.00	ADF	45	21.665	2.07708	4.38189e-07	0.0222444	1.14863e-07
co-occurence of coordinated regulators	Coordinated Regulator	Coordinated Regulator	ztf-9	nhr-67	M00636_2.00	M02408_2.00	ADF	29	9.13773	3.17366	2.94217e-08	0.0321317	0.0103473
co-occurence of coordinated regulators	Coordinated Regulator	Coordinated Regulator	ztf-9	nhr-36	M00636_2.00	M02418_2.00	ADF	34	9.88526	3.43946	2.16988e-10	0.0156518	0.000988559
co-occurence of coordinated regulators	Coordinated Regulator	Coordinated Regulator	die-1	egl-43	M00610_2.00	M00611_2.00	ADF	42	22.4777	1.86852	1.79564e-05	4.66224e-05	0.00271242
co-occurence of coordinated regulators	Coordinated Regulator	Coordinated Regulator	die-1	ztf-11	M00610_2.00	M00650_2.00	ADF	94	62.9152	1.49407	1.65854e-09	6.91856e-07	9.07018e-07
co-occurence of coordinated regulators	Coordinated Regulator	Coordinated Regulator	die-1	dmd-6	M00610_2.00	M00655_2.00	ADF	95	70.0601	1.35598	4.49023e-07	4.96566e-06	3.02529e-06
co-occurence of coordinated regulators	Coordinated Regulator	Coordinated Regulator	die-1	nhr-67	M00610_2.00	M02408_2.00	ADF	54	29.5495	1.82744	9.04915e-07	7.02818e-09	0.00412044
co-occurence of coordinated regulators	Coordinated Regulator	Coordinated Regulator	die-1	nhr-36	M00610_2.00	M02418_2.00	ADF	54	31.9669	1.68925	1.03988e-05	1.84814e-06	0.00767095
co-occurence of coordinated regulators	Coordinated Regulator	Coordinated Regulator	egl-43	ztf-11	M00611_2.00	M00650_2.00	ADF	40	16.8095	2.37961	8.51166e-08	0.0012725	7.18633e-06
co-occurence of coordinated regulators	Coordinated Regulator	Coordinated Regulator	egl-43	dmd-6	M00611_2.00	M00655_2.00	ADF	41	18.7184	2.19036	4.78106e-07	0.00303954	7.30062e-05
co-occurence of coordinated regulators	Coordinated Regulator	Coordinated Regulator	egl-43	nhr-67	M00611_2.00	M02408_2.00	ADF	26	7.89494	3.29325	8.48357e-08	0.00108683	0.00753604
co-occurence of coordinated regulators	Coordinated Regulator	Coordinated Regulator	egl-43	nhr-36	M00611_2.00	M02418_2.00	ADF	26	8.54081	3.04421	3.58472e-07	0.00202361	0.00526893
co-occurence of coordinated regulators	Coordinated Regulator	Coordinated Regulator	ztf-11	dmd-6	M00650_2.00	M00655_2.00	ADF	88	52.3929	1.67962	3.31644e-11	1.92294e-06	1.2728e-07
co-occurence of coordinated regulators	Coordinated Regulator	Coordinated Regulator	ztf-11	nhr-67	M00650_2.00	M02408_2.00	ADF	52	22.098	2.35316	4.72922e-10	6.08007e-07	0.00267047
co-occurence of coordinated regulators	Coordinated Regulator	Coordinated Regulator	ztf-11	nhr-36	M00650_2.00	M02418_2.00	ADF	52	23.9057	2.17521	6.62636e-09	1.66554e-07	0.00534607
co-occurence of coordinated regulators	Coordinated Regulator	Coordinated Regulator	dmd-6	nhr-67	M00655_2.00	M02408_2.00	ADF	53	24.6075	2.15381	5.97448e-09	9.73527e-07	0.00301369
co-occurence of coordinated regulators	Coordinated Regulator	Coordinated Regulator	dmd-6	nhr-36	M00655_2.00	M02418_2.00	ADF	53	26.6206	1.99094	8.07739e-08	3.40573e-08	0.00481958
co-occurence of coordinated regulators	Coordinated Regulator	Coordinated Regulator	nhr-67	nhr-36	M02408_2.00	M02418_2.00	ADF	37	11.2279	3.29537	8.91099e-11	0.00150689	0.000216914
co-occurence of coordinated regulators	Coordinated Regulator	Coordinated Regulator	hlh-4	unc-86	OH2018_HLH-4	M02244_2.00	ADL	69	22.3688	3.08465	2.84574e-17	1.96538e-07	0.00198084
co-occurence of coordinated regulators	Coordinated Regulator	Coordinated Regulator	hlh-4	egl-44	OH2018_HLH-4	M09438_2.00	ADL	79	28.299	2.79161	1.17843e-17	3.74687e-11	0.001683
co-occurence of coordinated regulators	Coordinated Regulator	Coordinated Regulator	hlh-4	egl-43	OH2018_HLH-4	M00611_2.00	ADL	56	17.8178	3.14293	2.81992e-14	5.43037e-08	0.00514014
co-occurence of coordinated regulators	Coordinated Regulator	Coordinated Regulator	hlh-4	ztf-11	OH2018_HLH-4	M00650_2.00	ADL	131	49.872	2.62673	2.64785e-31	1.44333e-11	0.00940887
co-occurence of coordinated regulators	Coordinated Regulator	Coordinated Regulator	hlh-4	dmd-6	OH2018_HLH-4	M00655_2.00	ADL	132	55.5356	2.37685	3.34183e-27	3.44925e-11	0.00509699
co-occurence of coordinated regulators	Coordinated Regulator	Coordinated Regulator	hlh-4	nhr-6	OH2018_HLH-4	M01298_2.00	ADL	92	33.3562	2.75811	1.07676e-20	3.17106e-10	0.000615742
co-occurence of coordinated regulators	Coordinated Regulator	Coordinated Regulator	unc-86	egl-44	M02244_2.00	M09438_2.00	ADL	48	19.9575	2.40511	1.08409e-08	0.000179946	0.00214154
co-occurence of coordinated regulators	Coordinated Regulator	Coordinated Regulator	unc-86	egl-43	M02244_2.00	M00611_2.00	ADL	39	12.5658	3.10367	5.1075e-10	8.14132e-05	0.000428582
co-occurence of coordinated regulators	Coordinated Regulator	Coordinated Regulator	unc-86	ztf-11	M02244_2.00	M00650_2.00	ADL	70	35.1716	1.99024	4.00759e-09	0.00221682	2.37079e-05
co-occurence of coordinated regulators	Coordinated Regulator	Coordinated Regulator	unc-86	dmd-6	M02244_2.00	M00655_2.00	ADL	69	39.1658	1.76174	5.54878e-07	0.00203615	1.6686e-05
co-occurence of coordinated regulators	Coordinated Regulator	Coordinated Regulator	unc-86	nhr-6	M02244_2.00	M01298_2.00	ADL	56	23.524	2.38055	6.86672e-10	0.000347491	7.17804e-05
co-occurence of coordinated regulators	Coordinated Regulator	Coordinated Regulator	egl-44	egl-43	M09438_2.00	M00611_2.00	ADL	41	15.8971	2.57909	2.52079e-08	0.000836937	0.00024827
co-occurence of coordinated regulators	Coordinated Regulator	Coordinated Regulator	egl-44	ztf-11	M09438_2.00	M00650_2.00	ADL	79	44.496	1.77544	3.48689e-08	0.00904598	2.66357e-05
co-occurence of coordinated regulators	Coordinated Regulator	Coordinated Regulator	egl-44	dmd-6	M09438_2.00	M00655_2.00	ADL	80	49.5492	1.61456	1.42053e-06	0.00290809	4.70325e-06
co-occurence of coordinated regulators	Coordinated Regulator	Coordinated Regulator	egl-44	nhr-6	M09438_2.00	M01298_2.00	ADL	64	29.7605	2.1505	1.41299e-09	4.21099e-05	0.000416497
co-occurence of coordinated regulators	Coordinated Regulator	Coordinated Regulator	egl-43	ztf-11	M00611_2.00	M00650_2.00	ADL	62	28.0158	2.21304	9.8201e-10	0.00757716	0.000213593
co-occurence of coordinated regulators	Coordinated Regulator	Coordinated Regulator	egl-43	dmd-6	M00611_2.00	M00655_2.00	ADL	60	31.1974	1.92324	2.52861e-07	0.00649828	8.47639e-07
co-occurence of coordinated regulators	Coordinated Regulator	Coordinated Regulator	egl-43	nhr-6	M00611_2.00	M01298_2.00	ADL	48	18.738	2.56165	1.65288e-09	0.00513307	0.000521225
co-occurence of coordinated regulators	Coordinated Regulator	Coordinated Regulator	ztf-11	dmd-6	M00650_2.00	M00655_2.00	ADL	137	87.3215	1.56891	1.15097e-12	0.0105615	0.000518486
co-occurence of coordinated regulators	Coordinated Regulator	Coordinated Regulator	ztf-11	nhr-6	M00650_2.00	M01298_2.00	ADL	98	52.4476	1.86853	8.96612e-12	4.38411e-06	0.00238394
co-occurence of coordinated regulators	Coordinated Regulator	Coordinated Regulator	dmd-6	nhr-6	M00655_2.00	M01298_2.00	ADL	95	58.4037	1.62661	3.69885e-08	9.86982e-06	0.00225263
co-occurence of coordinated regulators	Coordinated Regulator	Coordinated Regulator	atf-7	fos-1	M00595_2.00	M01144_2.00	AFD	32	8.42222	3.79947	4.76618e-11	0.000743599	0.000951281
co-occurence of coordinated regulators	Coordinated Regulator	Coordinated Regulator	atf-7	atf-5	M00595_2.00	M00593_2.00	AFD	41	9.90383	4.13981	2.52183e-15	0.000217175	0.00637733
co-occurence of coordinated regulators	Coordinated Regulator	Coordinated Regulator	atf-7	ceh-38	M00595_2.00	M03716_2.00	AFD	40	15.8917	2.51703	9.73014e-09	0.000443558	1.89293e-05
co-occurence of coordinated regulators	Coordinated Regulator	Coordinated Regulator	atf-7	ceh-48	M00595_2.00	M01905_2.00	AFD	44	15.7801	2.78832	5.15455e-11	0.000402992	0.000316092
co-occurence of coordinated regulators	Coordinated Regulator	Coordinated Regulator	atf-7	ceh-74	M00595_2.00	M01248_2.00	AFD	28	7.38865	3.7896	1.02859e-09	0.000132977	9.8015e-06
co-occurence of coordinated regulators	Coordinated Regulator	Coordinated Regulator	atf-7	ceh-58	M00595_2.00	M00676_2.00	AFD	41	10.6818	3.83829	2.57447e-14	0.00174649	0.000179729
co-occurence of coordinated regulators	Coordinated Regulator	Coordinated Regulator	atf-7	lim-7	M00595_2.00	M01242_2.00	AFD	37	12.0599	3.06801	2.88907e-10	0.00419384	4.19873e-06
co-occurence of coordinated regulators	Coordinated Regulator	Coordinated Regulator	atf-7	ceh-14	M00595_2.00	M00435_2.00	AFD	47	18.6706	2.51733	2.12641e-10	0.00161798	6.34912e-07
co-occurence of coordinated regulators	Coordinated Regulator	Coordinated Regulator	atf-7	ceh-23	M00595_2.00	M00671_2.00	AFD	46	13.7001	3.35765	3.12476e-14	0.000376615	0.00649283
co-occurence of coordinated regulators	Coordinated Regulator	Coordinated Regulator	atf-7	ceh-54	M00595_2.00	M02188_2.00	AFD	43	12.5403	3.42894	1.70356e-13	0.000630776	5.30998e-05
co-occurence of coordinated regulators	Coordinated Regulator	Coordinated Regulator	atf-7	ttx-1	M00595_2.00	M00396_2.00	AFD	31	6.76107	4.58508	1.31855e-12	0.000230814	1.91631e-06
co-occurence of coordinated regulators	Coordinated Regulator	Coordinated Regulator	atf-7	dsc-1	M00595_2.00	M02063_2.00	AFD	32	8.02755	3.98627	1.53849e-11	0.000173168	0.0194741
co-occurence of coordinated regulators	Coordinated Regulator	Coordinated Regulator	atf-7	gei-3	M00595_2.00	M00711_2.00	AFD	35	11.0458	3.16863	4.64814e-10	0.001073	3.42822e-06
co-occurence of coordinated regulators	Coordinated Regulator	Coordinated Regulator	atf-7	egl-13	M00595_2.00	M00710_2.00	AFD	47	18.9569	2.47931	3.47292e-10	0.00149617	8.25312e-08
co-occurence of coordinated regulators	Coordinated Regulator	Coordinated Regulator	atf-7	daf-19	M00595_2.00	M00709_2.00	AFD	27	6.55079	4.12164	3.98559e-10	0.00203583	0.0125273
co-occurence of coordinated regulators	Coordinated Regulator	Coordinated Regulator	atf-7	ztf-3	M00595_2.00	M00640_2.00	AFD	40	10.8598	3.68332	2.06667e-13	0.000551282	6.16789e-05
co-occurence of coordinated regulators	Coordinated Regulator	Coordinated Regulator	atf-7	ztf-9	M00595_2.00	M00636_2.00	AFD	32	8.63411	3.70623	8.55127e-11	0.000532615	0.00318695
co-occurence of coordinated regulators	Coordinated Regulator	Coordinated Regulator	atf-7	ztf-11	M00595_2.00	M00650_2.00	AFD	51	20.88	2.44252	5.70579e-11	0.00176281	4.20678e-10
co-occurence of coordinated regulators	Coordinated Regulator	Coordinated Regulator	atf-7	dmd-8	M00595_2.00	M00660_2.00	AFD	51	23.5052	2.16973	3.36899e-09	0.00176281	2.07986e-10
co-occurence of coordinated regulators	Coordinated Regulator	Coordinated Regulator	atf-7	nhr-6	M00595_2.00	M01298_2.00	AFD	44	13.9653	3.15066	1.14948e-12	0.000921173	1.09874e-06
co-occurence of coordinated regulators	Coordinated Regulator	Coordinated Regulator	atf-7	nhr-36	M00595_2.00	M02418_2.00	AFD	36	10.6091	3.39333	4.10694e-11	0.000803588	0.000150428
co-occurence of coordinated regulators	Coordinated Regulator	Coordinated Regulator	fos-1	atf-5	M01144_2.00	M00593_2.00	AFD	25	7.58037	3.29799	1.14416e-07	0.0103654	0.00105187
co-occurence of coordinated regulators	Coordinated Regulator	Coordinated Regulator	fos-1	ceh-38	M01144_2.00	M03716_2.00	AFD	32	12.1635	2.63082	1.97346e-07	0.00279705	0.000291448
co-occurence of coordinated regulators	Coordinated Regulator	Coordinated Regulator	fos-1	ceh-74	M01144_2.00	M01248_2.00	AFD	26	5.65525	4.59749	1.02306e-10	0.00713498	0.00372377
co-occurence of coordinated regulators	Coordinated Regulator	Coordinated Regulator	fos-1	ceh-58	M01144_2.00	M00676_2.00	AFD	35	8.17585	4.2809	2.09215e-13	0.0141944	1.4328e-05
co-occurence of coordinated regulators	Coordinated Regulator	Coordinated Regulator	fos-1	ceh-14	M01144_2.00	M00435_2.00	AFD	40	14.2904	2.79908	5.34993e-10	0.0305069	3.37079e-05
co-occurence of coordinated regulators	Coordinated Regulator	Coordinated Regulator	fos-1	ceh-23	M01144_2.00	M00671_2.00	AFD	38	10.486	3.62388	1.59599e-12	0.00716212	0.000439227
co-occurence of coordinated regulators	Coordinated Regulator	Coordinated Regulator	fos-1	ceh-54	M01144_2.00	M02188_2.00	AFD	30	9.59833	3.12554	1.49061e-08	0.00880368	3.09028e-06
co-occurence of coordinated regulators	Coordinated Regulator	Coordinated Regulator	fos-1	ttx-1	M01144_2.00	M00396_2.00	AFD	30	5.1749	5.79721	1.38364e-14	0.0172434	0.000107715
co-occurence of coordinated regulators	Coordinated Regulator	Coordinated Regulator	fos-1	dsc-1	M01144_2.00	M02063_2.00	AFD	24	6.14427	3.90608	1.09673e-08	0.0032384	0.00592896
co-occurence of coordinated regulators	Coordinated Regulator	Coordinated Regulator	fos-1	gei-3	M01144_2.00	M00711_2.00	AFD	29	8.45441	3.43016	4.00491e-09	0.0033453	5.84373e-06
co-occurence of coordinated regulators	Coordinated Regulator	Coordinated Regulator	fos-1	egl-13	M01144_2.00	M00710_2.00	AFD	41	14.5095	2.82573	2.23272e-10	0.0112701	5.34931e-07
co-occurence of coordinated regulators	Coordinated Regulator	Coordinated Regulator	fos-1	daf-19	M01144_2.00	M00709_2.00	AFD	22	5.01396	4.38775	6.98114e-09	0.0273515	0.00037503
co-occurence of coordinated regulators	Coordinated Regulator	Coordinated Regulator	fos-1	ztf-3	M01144_2.00	M00640_2.00	AFD	31	8.31203	3.72953	1.56024e-10	0.00738606	0.000124426
co-occurence of coordinated regulators	Coordinated Regulator	Coordinated Regulator	fos-1	ztf-9	M01144_2.00	M00636_2.00	AFD	29	6.60853	4.38827	2.05506e-11	0.0268403	0.00604326
co-occurence of coordinated regulators	Coordinated Regulator	Coordinated Regulator	fos-1	ztf-11	M01144_2.00	M00650_2.00	AFD	40	15.9815	2.50289	1.13005e-08	0.00792713	3.84803e-08
co-occurence of coordinated regulators	Coordinated Regulator	Coordinated Regulator	fos-1	dmd-8	M01144_2.00	M00660_2.00	AFD	43	17.9908	2.39011	8.84342e-09	0.00642486	5.82996e-07
co-occurence of coordinated regulators	Coordinated Regulator	Coordinated Regulator	fos-1	nhr-6	M01144_2.00	M01298_2.00	AFD	35	10.689	3.27439	2.04212e-10	0.0146893	1.11163e-05
co-occurence of coordinated regulators	Coordinated Regulator	Coordinated Regulator	fos-1	nhr-36	M01144_2.00	M02418_2.00	AFD	29	8.12014	3.57137	1.71972e-09	0.00658265	0.000104873
co-occurence of coordinated regulators	Coordinated Regulator	Coordinated Regulator	atf-5	ceh-38	M00593_2.00	M03716_2.00	AFD	33	14.3033	2.30717	2.08516e-06	0.00314981	0.000124918
co-occurence of coordinated regulators	Coordinated Regulator	Coordinated Regulator	atf-5	ceh-48	M00593_2.00	M01905_2.00	AFD	35	14.2028	2.4643	1.97825e-07	0.00356082	0.00110469
co-occurence of coordinated regulators	Coordinated Regulator	Coordinated Regulator	atf-5	ceh-74	M00593_2.00	M01248_2.00	AFD	23	6.65011	3.45859	1.80082e-07	0.00182041	1.69809e-05
co-occurence of coordinated regulators	Coordinated Regulator	Coordinated Regulator	atf-5	ceh-58	M00593_2.00	M00676_2.00	AFD	31	9.61412	3.22442	4.07244e-09	0.00569434	6.13938e-05
co-occurence of coordinated regulators	Coordinated Regulator	Coordinated Regulator	atf-5	lim-7	M00593_2.00	M01242_2.00	AFD	31	10.8545	2.85597	5.69548e-08	0.00760337	2.88849e-05
co-occurence of coordinated regulators	Coordinated Regulator	Coordinated Regulator	atf-5	ceh-14	M00593_2.00	M00435_2.00	AFD	37	16.8043	2.20181	1.14611e-06	0.012739	4.19559e-07
co-occurence of coordinated regulators	Coordinated Regulator	Coordinated Regulator	atf-5	ceh-23	M00593_2.00	M00671_2.00	AFD	37	12.3307	3.00065	5.17697e-10	0.00444153	0.00707751
co-occurence of coordinated regulators	Coordinated Regulator	Coordinated Regulator	atf-5	ceh-54	M00593_2.00	M02188_2.00	AFD	34	11.2868	3.01236	2.99077e-09	0.00795593	0.000138096
co-occurence of coordinated regulators	Coordinated Regulator	Coordinated Regulator	atf-5	ttx-1	M00593_2.00	M00396_2.00	AFD	25	6.08526	4.10829	2.04873e-09	0.00114925	1.47257e-06
co-occurence of coordinated regulators	Coordinated Regulator	Coordinated Regulator	atf-5	dsc-1	M00593_2.00	M02063_2.00	AFD	29	7.22515	4.01376	1.41633e-10	0.0118531	0.0107676
co-occurence of coordinated regulators	Coordinated Regulator	Coordinated Regulator	atf-5	gei-3	M00593_2.00	M00711_2.00	AFD	27	9.94168	2.71584	1.27215e-06	0.00568166	1.7218e-05
co-occurence of coordinated regulators	Coordinated Regulator	Coordinated Regulator	atf-5	egl-13	M00593_2.00	M00710_2.00	AFD	36	17.062	2.10995	4.511e-06	0.00233365	2.38022e-07
co-occurence of coordinated regulators	Coordinated Regulator	Coordinated Regulator	atf-5	daf-19	M00593_2.00	M00709_2.00	AFD	23	5.896	3.90095	2.34986e-08	0.0169995	0.00837533
co-occurence of coordinated regulators	Coordinated Regulator	Coordinated Regulator	atf-5	ztf-3	M00593_2.00	M00640_2.00	AFD	34	9.77426	3.47852	9.08766e-11	0.00524335	3.27404e-05
co-occurence of coordinated regulators	Coordinated Regulator	Coordinated Regulator	atf-5	ztf-9	M00593_2.00	M00636_2.00	AFD	28	7.77108	3.6031	2.88376e-09	0.00047215	0.0115043
co-occurence of coordinated regulators	Coordinated Regulator	Coordinated Regulator	atf-5	ztf-11	M00593_2.00	M00650_2.00	AFD	40	18.793	2.12846	7.83112e-07	0.00400559	2.68119e-09
co-occurence of coordinated regulators	Coordinated Regulator	Coordinated Regulator	atf-5	dmd-8	M00593_2.00	M00660_2.00	AFD	40	21.1557	1.89074	1.45364e-05	0.00400559	5.42215e-09
co-occurence of coordinated regulators	Coordinated Regulator	Coordinated Regulator	atf-5	nhr-6	M00593_2.00	M01298_2.00	AFD	35	12.5694	2.78454	1.09435e-08	0.00416014	7.35741e-05
co-occurence of coordinated regulators	Coordinated Regulator	Coordinated Regulator	atf-5	nhr-36	M00593_2.00	M02418_2.00	AFD	30	9.54861	3.14182	1.33354e-08	0.00571118	0.000439227
co-occurence of coordinated regulators	Coordinated Regulator	Coordinated Regulator	ceh-38	ceh-48	M03716_2.00	M01905_2.00	AFD	57	22.7899	2.50111	5.40037e-13	0.000626454	0.000344364
co-occurence of coordinated regulators	Coordinated Regulator	Coordinated Regulator	ceh-38	ceh-74	M03716_2.00	M01248_2.00	AFD	34	10.6708	3.18626	7.81022e-10	8.14054e-05	0.000333616
co-occurence of coordinated regulators	Coordinated Regulator	Coordinated Regulator	ceh-38	ceh-58	M03716_2.00	M00676_2.00	AFD	42	15.4269	2.72252	3.57676e-10	0.000122187	2.86451e-06
co-occurence of coordinated regulators	Coordinated Regulator	Coordinated Regulator	ceh-38	lim-7	M03716_2.00	M01242_2.00	AFD	42	17.4171	2.41142	1.1349e-08	0.000893939	4.54366e-06
co-occurence of coordinated regulators	Coordinated Regulator	Coordinated Regulator	ceh-38	ceh-14	M03716_2.00	M00435_2.00	AFD	55	26.9643	2.03973	4.11951e-09	0.00195272	3.93453e-06
co-occurence of coordinated regulators	Coordinated Regulator	Coordinated Regulator	ceh-38	ceh-23	M03716_2.00	M00671_2.00	AFD	50	19.7858	2.52706	3.20959e-11	0.000122621	0.000336581
co-occurence of coordinated regulators	Coordinated Regulator	Coordinated Regulator	ceh-38	ceh-54	M03716_2.00	M02188_2.00	AFD	44	18.1109	2.42947	3.30254e-09	0.000190207	1.50883e-05
co-occurence of coordinated regulators	Coordinated Regulator	Coordinated Regulator	ceh-38	ttx-1	M03716_2.00	M00396_2.00	AFD	41	9.76444	4.19891	1.6248e-15	0.00412012	1.00497e-05
co-occurence of coordinated regulators	Coordinated Regulator	Coordinated Regulator	ceh-38	dsc-1	M03716_2.00	M02063_2.00	AFD	34	11.5935	2.93267	5.63864e-09	0.000247163	0.00270528
co-occurence of coordinated regulators	Coordinated Regulator	Coordinated Regulator	ceh-38	gei-3	M03716_2.00	M00711_2.00	AFD	41	15.9525	2.57013	3.24318e-09	0.0020755	1.85293e-05
co-occurence of coordinated regulators	Coordinated Regulator	Coordinated Regulator	ceh-38	egl-13	M03716_2.00	M00710_2.00	AFD	55	27.3778	2.00893	7.13146e-09	0.00581027	1.66512e-06
co-occurence of coordinated regulators	Coordinated Regulator	Coordinated Regulator	ceh-38	daf-19	M03716_2.00	M00709_2.00	AFD	37	9.46076	3.91089	4.31838e-13	0.00199925	0.0024933
co-occurence of coordinated regulators	Coordinated Regulator	Coordinated Regulator	ceh-38	ztf-3	M03716_2.00	M00640_2.00	AFD	43	15.6838	2.74168	1.59048e-10	0.00268319	6.42225e-05
co-occurence of coordinated regulators	Coordinated Regulator	Coordinated Regulator	ceh-38	ztf-9	M03716_2.00	M00636_2.00	AFD	39	12.4695	3.12763	4.61372e-11	0.00998299	0.0138308
co-occurence of coordinated regulators	Coordinated Regulator	Coordinated Regulator	ceh-38	ztf-11	M03716_2.00	M00650_2.00	AFD	59	30.1553	1.95654	2.82056e-09	0.00647322	4.26657e-09
co-occurence of coordinated regulators	Coordinated Regulator	Coordinated Regulator	ceh-38	dmd-8	M03716_2.00	M00660_2.00	AFD	60	33.9466	1.76748	8.90608e-08	0.00240954	2.14808e-09
co-occurence of coordinated regulators	Coordinated Regulator	Coordinated Regulator	ceh-38	nhr-6	M03716_2.00	M01298_2.00	AFD	49	20.1689	2.42948	2.18041e-10	0.000294182	1.36293e-06
co-occurence of coordinated regulators	Coordinated Regulator	Coordinated Regulator	ceh-38	nhr-36	M03716_2.00	M02418_2.00	AFD	38	15.3218	2.48013	3.9475e-08	0.000134539	2.94115e-05
co-occurence of coordinated regulators	Coordinated Regulator	Coordinated Regulator	ceh-48	ceh-74	M01905_2.00	M01248_2.00	AFD	33	10.5959	3.11442	2.52583e-09	0.00130019	0.000198247
co-occurence of coordinated regulators	Coordinated Regulator	Coordinated Regulator	ceh-48	ceh-58	M01905_2.00	M00676_2.00	AFD	47	15.3185	3.06818	3.13893e-13	0.00346279	2.43453e-06
co-occurence of coordinated regulators	Coordinated Regulator	Coordinated Regulator	ceh-48	lim-7	M01905_2.00	M01242_2.00	AFD	44	17.2948	2.54411	8.40726e-10	0.0107543	6.98928e-05
co-occurence of coordinated regulators	Coordinated Regulator	Coordinated Regulator	ceh-48	ceh-14	M01905_2.00	M00435_2.00	AFD	59	26.775	2.20355	2.52688e-11	0.0275426	1.4326e-07
co-occurence of coordinated regulators	Coordinated Regulator	Coordinated Regulator	ceh-48	ceh-23	M01905_2.00	M00671_2.00	AFD	53	19.6469	2.69763	4.36988e-13	0.00150331	0.00197621
co-occurence of coordinated regulators	Coordinated Regulator	Coordinated Regulator	ceh-48	ceh-54	M01905_2.00	M02188_2.00	AFD	48	17.9837	2.66908	1.71188e-11	0.00070673	5.79244e-06
co-occurence of coordinated regulators	Coordinated Regulator	Coordinated Regulator	ceh-48	ttx-1	M01905_2.00	M00396_2.00	AFD	43	9.69586	4.43488	4.38521e-17	0.00487794	3.37527e-06
co-occurence of coordinated regulators	Coordinated Regulator	Coordinated Regulator	ceh-48	dsc-1	M01905_2.00	M02063_2.00	AFD	37	11.5121	3.21401	8.50717e-11	0.00194283	0.00107415
co-occurence of coordinated regulators	Coordinated Regulator	Coordinated Regulator	ceh-48	gei-3	M01905_2.00	M00711_2.00	AFD	43	15.8404	2.71457	2.14294e-10	0.022509	2.3293e-06
co-occurence of coordinated regulators	Coordinated Regulator	Coordinated Regulator	ceh-48	egl-13	M01905_2.00	M00710_2.00	AFD	57	27.1855	2.0967	5.42564e-10	0.0148816	6.30905e-07
co-occurence of coordinated regulators	Coordinated Regulator	Coordinated Regulator	ceh-48	daf-19	M01905_2.00	M00709_2.00	AFD	38	9.39432	4.045	7.24611e-14	0.00131056	0.00270456
co-occurence of coordinated regulators	Coordinated Regulator	Coordinated Regulator	ceh-48	ztf-3	M01905_2.00	M00640_2.00	AFD	45	15.5737	2.88949	8.93973e-12	0.00497636	3.32094e-05
co-occurence of coordinated regulators	Coordinated Regulator	Coordinated Regulator	ceh-48	ztf-9	M01905_2.00	M00636_2.00	AFD	41	12.3819	3.31127	2.21579e-12	0.0271154	0.0190079
co-occurence of coordinated regulators	Coordinated Regulator	Coordinated Regulator	ceh-48	ztf-11	M01905_2.00	M00650_2.00	AFD	61	29.9435	2.03717	1.98338e-10	0.00942815	9.23102e-10
co-occurence of coordinated regulators	Coordinated Regulator	Coordinated Regulator	ceh-48	dmd-8	M01905_2.00	M00660_2.00	AFD	63	33.7082	1.86898	2.48437e-09	0.00806034	2.05776e-09
co-occurence of coordinated regulators	Coordinated Regulator	Coordinated Regulator	ceh-48	nhr-6	M01905_2.00	M01298_2.00	AFD	50	20.0273	2.49659	4.84026e-11	0.000346315	1.79891e-06
co-occurence of coordinated regulators	Coordinated Regulator	Coordinated Regulator	ceh-48	nhr-36	M01905_2.00	M02418_2.00	AFD	42	15.2142	2.76059	2.38069e-10	0.00102999	4.72341e-05
co-occurence of coordinated regulators	Coordinated Regulator	Coordinated Regulator	ceh-74	ceh-58	M01248_2.00	M00676_2.00	AFD	32	7.17252	4.46147	1.03613e-12	0.00466263	4.51929e-05
co-occurence of coordinated regulators	Coordinated Regulator	Coordinated Regulator	ceh-74	lim-7	M01248_2.00	M01242_2.00	AFD	27	8.09786	3.33421	2.63748e-08	0.00019066	2.54273e-05
co-occurence of coordinated regulators	Coordinated Regulator	Coordinated Regulator	ceh-74	ceh-14	M01248_2.00	M00435_2.00	AFD	35	12.5367	2.7918	1.02749e-08	0.000966725	7.36265e-07
co-occurence of coordinated regulators	Coordinated Regulator	Coordinated Regulator	ceh-74	ceh-23	M01248_2.00	M00671_2.00	AFD	34	9.19916	3.69599	2.03759e-11	0.000655949	1.19587e-05
co-occurence of coordinated regulators	Coordinated Regulator	Coordinated Regulator	ceh-74	ceh-54	M01248_2.00	M02188_2.00	AFD	33	8.42043	3.91904	1.04272e-11	0.000390479	5.89179e-05
co-occurence of coordinated regulators	Coordinated Regulator	Coordinated Regulator	ceh-74	ttx-1	M01248_2.00	M00396_2.00	AFD	30	4.53984	6.60816	6.15439e-16	0.00478373	2.64205e-05
co-occurence of coordinated regulators	Coordinated Regulator	Coordinated Regulator	ceh-74	dsc-1	M01248_2.00	M02063_2.00	AFD	27	5.39025	5.00905	7.33853e-12	0.000368117	6.15722e-05
co-occurence of coordinated regulators	Coordinated Regulator	Coordinated Regulator	ceh-74	gei-3	M01248_2.00	M00711_2.00	AFD	29	7.41689	3.91	2.49626e-10	0.00234404	6.9217e-06
co-occurence of coordinated regulators	Coordinated Regulator	Coordinated Regulator	ceh-74	egl-13	M01248_2.00	M00710_2.00	AFD	39	12.7289	3.06389	8.16193e-11	0.00292276	8.71597e-08
co-occurence of coordinated regulators	Coordinated Regulator	Coordinated Regulator	ceh-74	daf-19	M01248_2.00	M00709_2.00	AFD	27	4.39865	6.13824	1.02009e-13	7.3115e-05	0.00101631
co-occurence of coordinated regulators	Coordinated Regulator	Coordinated Regulator	ceh-74	ztf-3	M01248_2.00	M00640_2.00	AFD	30	7.29199	4.11411	3.72471e-11	0.000151441	1.89652e-05
co-occurence of coordinated regulators	Coordinated Regulator	Coordinated Regulator	ceh-74	ztf-9	M01248_2.00	M00636_2.00	AFD	28	5.79753	4.82964	6.26013e-12	0.000187436	0.00253446
co-occurence of coordinated regulators	Coordinated Regulator	Coordinated Regulator	ceh-74	ztf-11	M01248_2.00	M00650_2.00	AFD	38	14.0203	2.71036	4.03148e-09	0.00201672	8.58868e-07
co-occurence of coordinated regulators	Coordinated Regulator	Coordinated Regulator	ceh-74	dmd-8	M01248_2.00	M00660_2.00	AFD	39	15.783	2.47101	2.64116e-08	0.00292276	1.07031e-07
co-occurence of coordinated regulators	Coordinated Regulator	Coordinated Regulator	ceh-74	nhr-6	M01248_2.00	M01298_2.00	AFD	34	9.37727	3.62579	3.2822e-11	0.000535085	7.82712e-06
co-occurence of coordinated regulators	Coordinated Regulator	Coordinated Regulator	ceh-74	nhr-36	M01248_2.00	M02418_2.00	AFD	27	7.12364	3.7902	2.13507e-09	7.58449e-05	4.8689e-06
co-occurence of coordinated regulators	Coordinated Regulator	Coordinated Regulator	ceh-58	lim-7	M00676_2.00	M01242_2.00	AFD	41	11.7072	3.50213	4.19257e-13	0.000168925	0.00103503
co-occurence of coordinated regulators	Coordinated Regulator	Coordinated Regulator	ceh-58	ceh-14	M00676_2.00	M00435_2.00	AFD	50	18.1244	2.75871	1.50204e-12	9.42558e-05	4.19873e-06
co-occurence of coordinated regulators	Coordinated Regulator	Coordinated Regulator	ceh-58	ceh-23	M00676_2.00	M00671_2.00	AFD	51	13.2993	3.83479	3.43911e-18	0.000108579	0.000331891
co-occurence of coordinated regulators	Coordinated Regulator	Coordinated Regulator	ceh-58	ceh-54	M00676_2.00	M02188_2.00	AFD	48	12.1735	3.94299	2.05011e-17	0.000263603	3.19746e-06
co-occurence of coordinated regulators	Coordinated Regulator	Coordinated Regulator	ceh-58	ttx-1	M00676_2.00	M00396_2.00	AFD	37	6.56329	5.63741	1.43682e-17	2.2206e-05	2.36153e-05
co-occurence of coordinated regulators	Coordinated Regulator	Coordinated Regulator	ceh-58	dsc-1	M00676_2.00	M02063_2.00	AFD	31	7.79273	3.97807	3.58194e-11	5.23212e-05	0.000120879
co-occurence of coordinated regulators	Coordinated Regulator	Coordinated Regulator	ceh-58	gei-3	M00676_2.00	M00711_2.00	AFD	33	10.7227	3.07759	3.33962e-09	0.000161845	2.185e-05
co-occurence of coordinated regulators	Coordinated Regulator	Coordinated Regulator	ceh-58	egl-13	M00676_2.00	M00710_2.00	AFD	52	18.4023	2.82573	1.56925e-13	0.000178204	3.06913e-07
co-occurence of coordinated regulators	Coordinated Regulator	Coordinated Regulator	ceh-58	daf-19	M00676_2.00	M00709_2.00	AFD	30	6.35917	4.7176	1.68819e-12	9.88026e-06	0.0167215
co-occurence of coordinated regulators	Coordinated Regulator	Coordinated Regulator	ceh-58	ztf-3	M00676_2.00	M00640_2.00	AFD	36	10.5421	3.41488	3.49733e-11	1.11571e-05	4.00452e-05
co-occurence of coordinated regulators	Coordinated Regulator	Coordinated Regulator	ceh-58	ztf-9	M00676_2.00	M00636_2.00	AFD	32	8.38154	3.81791	4.26071e-11	1.57844e-06	0.000169915
co-occurence of coordinated regulators	Coordinated Regulator	Coordinated Regulator	ceh-58	ztf-11	M00676_2.00	M00650_2.00	AFD	54	20.2693	2.66413	3.52605e-13	8.68222e-05	1.42093e-08
co-occurence of coordinated regulators	Coordinated Regulator	Coordinated Regulator	ceh-58	dmd-8	M00676_2.00	M00660_2.00	AFD	56	22.8176	2.45424	2.21118e-12	0.000137639	1.65567e-07
co-occurence of coordinated regulators	Coordinated Regulator	Coordinated Regulator	ceh-58	nhr-6	M00676_2.00	M01298_2.00	AFD	47	13.5568	3.46689	4.61082e-15	0.000576782	2.876e-05
co-occurence of coordinated regulators	Coordinated Regulator	Coordinated Regulator	ceh-58	nhr-36	M00676_2.00	M02418_2.00	AFD	35	10.2987	3.39848	8.01413e-11	6.79716e-05	0.000508582
co-occurence of coordinated regulators	Coordinated Regulator	Coordinated Regulator	lim-7	ceh-14	M01242_2.00	M00435_2.00	AFD	51	20.4627	2.49234	2.84471e-11	0.000813454	0.000157714
co-occurence of coordinated regulators	Coordinated Regulator	Coordinated Regulator	lim-7	ceh-23	M01242_2.00	M00671_2.00	AFD	48	15.0151	3.19679	3.50937e-14	0.000244785	0.00501948
co-occurence of coordinated regulators	Coordinated Regulator	Coordinated Regulator	lim-7	ceh-54	M01242_2.00	M02188_2.00	AFD	40	13.744	2.91035	1.79227e-10	0.000284878	7.13602e-06
co-occurence of coordinated regulators	Coordinated Regulator	Coordinated Regulator	lim-7	ttx-1	M01242_2.00	M00396_2.00	AFD	34	7.41004	4.58837	8.42928e-14	9.00181e-05	9.85551e-05
co-occurence of coordinated regulators	Coordinated Regulator	Coordinated Regulator	lim-7	dsc-1	M01242_2.00	M02063_2.00	AFD	30	8.79809	3.40983	2.31991e-09	1.11236e-05	0.0187493
co-occurence of coordinated regulators	Coordinated Regulator	Coordinated Regulator	lim-7	gei-3	M01242_2.00	M00711_2.00	AFD	34	12.106	2.80852	1.56152e-08	6.79269e-05	9.27992e-06
co-occurence of coordinated regulators	Coordinated Regulator	Coordinated Regulator	lim-7	egl-13	M01242_2.00	M00710_2.00	AFD	47	20.7765	2.26217	6.2451e-09	0.00169118	7.46679e-06
co-occurence of coordinated regulators	Coordinated Regulator	Coordinated Regulator	lim-7	daf-19	M01242_2.00	M00709_2.00	AFD	31	7.17959	4.3178	5.4146e-12	0.00019116	0.00280714
co-occurence of coordinated regulators	Coordinated Regulator	Coordinated Regulator	lim-7	ztf-3	M01242_2.00	M00640_2.00	AFD	36	11.9022	3.02466	7.90711e-10	3.65364e-05	2.86999e-05
co-occurence of coordinated regulators	Coordinated Regulator	Coordinated Regulator	lim-7	ztf-9	M01242_2.00	M00636_2.00	AFD	37	9.46287	3.91002	4.3446e-13	0.000516396	0.0110775
co-occurence of coordinated regulators	Coordinated Regulator	Coordinated Regulator	lim-7	ztf-11	M01242_2.00	M00650_2.00	AFD	50	22.8843	2.18491	4.35479e-09	0.000158263	3.22652e-08
co-occurence of coordinated regulators	Coordinated Regulator	Coordinated Regulator	lim-7	dmd-8	M01242_2.00	M00660_2.00	AFD	52	25.7614	2.01852	2.3839e-08	0.000569503	2.03606e-07
co-occurence of coordinated regulators	Coordinated Regulator	Coordinated Regulator	lim-7	nhr-6	M01242_2.00	M01298_2.00	AFD	39	15.3058	2.54805	1.17673e-08	7.40016e-05	1.00231e-05
co-occurence of coordinated regulators	Coordinated Regulator	Coordinated Regulator	lim-7	nhr-36	M01242_2.00	M02418_2.00	AFD	37	11.6274	3.18214	1.10278e-10	1.85751e-05	0.0122833
co-occurence of coordinated regulators	Coordinated Regulator	Coordinated Regulator	ceh-14	ceh-23	M00435_2.00	M00671_2.00	AFD	62	23.2456	2.66717	8.36483e-16	1.12454e-05	0.0251083
co-occurence of coordinated regulators	Coordinated Regulator	Coordinated Regulator	ceh-14	ceh-54	M00435_2.00	M02188_2.00	AFD	53	21.2778	2.49086	8.48821e-12	3.99206e-06	4.5683e-06
co-occurence of coordinated regulators	Coordinated Regulator	Coordinated Regulator	ceh-14	ttx-1	M00435_2.00	M00396_2.00	AFD	41	11.4718	3.57397	2.2875e-13	2.03821e-06	2.65967e-05
co-occurence of coordinated regulators	Coordinated Regulator	Coordinated Regulator	ceh-14	dsc-1	M00435_2.00	M02063_2.00	AFD	41	13.6208	3.01011	3.62321e-11	4.22441e-06	0.0177658
co-occurence of coordinated regulators	Coordinated Regulator	Coordinated Regulator	ceh-14	gei-3	M00435_2.00	M00711_2.00	AFD	44	18.7419	2.34768	9.01214e-09	9.63425e-06	9.64915e-06
co-occurence of coordinated regulators	Coordinated Regulator	Coordinated Regulator	ceh-14	egl-13	M00435_2.00	M00710_2.00	AFD	64	32.1651	1.98973	1.00848e-10	5.51572e-06	1.72528e-05
co-occurence of coordinated regulators	Coordinated Regulator	Coordinated Regulator	ceh-14	daf-19	M00435_2.00	M00709_2.00	AFD	39	11.1151	3.50875	1.83579e-12	3.79423e-05	0.00433744
co-occurence of coordinated regulators	Coordinated Regulator	Coordinated Regulator	ceh-14	ztf-3	M00435_2.00	M00640_2.00	AFD	49	18.4263	2.65924	1.03131e-11	5.25253e-07	3.51543e-05
co-occurence of coordinated regulators	Coordinated Regulator	Coordinated Regulator	ceh-14	ztf-9	M00435_2.00	M00636_2.00	AFD	40	14.6499	2.73039	1.0649e-09	1.30934e-06	0.0162887
co-occurence of coordinated regulators	Coordinated Regulator	Coordinated Regulator	ceh-14	ztf-11	M00435_2.00	M00650_2.00	AFD	69	35.4283	1.9476	1.38523e-11	3.47734e-05	1.00828e-08
co-occurence of coordinated regulators	Coordinated Regulator	Coordinated Regulator	ceh-14	dmd-8	M00435_2.00	M00660_2.00	AFD	72	39.8825	1.8053	8.91264e-11	9.64096e-06	6.3866e-09
co-occurence of coordinated regulators	Coordinated Regulator	Coordinated Regulator	ceh-14	nhr-6	M00435_2.00	M01298_2.00	AFD	52	23.6957	2.19449	1.38369e-09	9.93446e-06	7.01356e-06
co-occurence of coordinated regulators	Coordinated Regulator	Coordinated Regulator	ceh-14	nhr-36	M00435_2.00	M02418_2.00	AFD	45	18.0009	2.49987	8.21425e-10	5.09102e-07	0.00170936
co-occurence of coordinated regulators	Coordinated Regulator	Coordinated Regulator	ceh-23	ceh-54	M00671_2.00	M02188_2.00	AFD	53	15.6132	3.39457	6.22007e-17	0.00229725	3.25307e-05
co-occurence of coordinated regulators	Coordinated Regulator	Coordinated Regulator	ceh-23	ttx-1	M00671_2.00	M00396_2.00	AFD	39	8.41779	4.63304	5.36911e-16	6.11977e-05	9.38487e-07
co-occurence of coordinated regulators	Coordinated Regulator	Coordinated Regulator	ceh-23	dsc-1	M00671_2.00	M02063_2.00	AFD	40	9.99462	4.00215	1.71553e-14	0.00696113	0.0147026
co-occurence of coordinated regulators	Coordinated Regulator	Coordinated Regulator	ceh-23	gei-3	M00671_2.00	M00711_2.00	AFD	42	13.7524	3.05401	1.21254e-11	0.00341801	8.81401e-07
co-occurence of coordinated regulators	Coordinated Regulator	Coordinated Regulator	ceh-23	egl-13	M00671_2.00	M00710_2.00	AFD	60	23.602	2.54215	3.27379e-14	0.0062728	8.33958e-07
co-occurence of coordinated regulators	Coordinated Regulator	Coordinated Regulator	ceh-23	daf-19	M00671_2.00	M00709_2.00	AFD	34	8.15599	4.16871	9.86771e-13	0.00559036	0.0193782
co-occurence of coordinated regulators	Coordinated Regulator	Coordinated Regulator	ceh-23	ztf-3	M00671_2.00	M00640_2.00	AFD	42	13.5208	3.10632	7.31115e-12	0.00155296	1.11691e-05
co-occurence of coordinated regulators	Coordinated Regulator	Coordinated Regulator	ceh-23	ztf-9	M00671_2.00	M00636_2.00	AFD	41	10.7498	3.81402	3.12039e-14	0.000781714	0.00951925
co-occurence of coordinated regulators	Coordinated Regulator	Coordinated Regulator	ceh-23	ztf-11	M00671_2.00	M00650_2.00	AFD	62	25.9965	2.38494	1.28776e-13	0.0115119	9.55861e-10
co-occurence of coordinated regulators	Coordinated Regulator	Coordinated Regulator	ceh-23	dmd-8	M00671_2.00	M00660_2.00	AFD	62	29.2649	2.11858	2.18144e-11	0.00422637	1.98797e-09
co-occurence of coordinated regulators	Coordinated Regulator	Coordinated Regulator	ceh-23	nhr-6	M00671_2.00	M01298_2.00	AFD	50	17.3874	2.87565	3.43685e-13	0.00267162	4.0066e-06
co-occurence of coordinated regulators	Coordinated Regulator	Coordinated Regulator	ceh-23	nhr-36	M00671_2.00	M02418_2.00	AFD	45	13.2087	3.40685	4.25493e-14	0.0290304	0.00130308
co-occurence of coordinated regulators	Coordinated Regulator	Coordinated Regulator	ceh-54	ttx-1	M02188_2.00	M00396_2.00	AFD	38	7.70521	4.93173	2.30651e-16	7.7194e-05	7.50655e-06
co-occurence of coordinated regulators	Coordinated Regulator	Coordinated Regulator	ceh-54	dsc-1	M02188_2.00	M02063_2.00	AFD	36	9.14855	3.93505	8.33622e-13	5.17065e-06	0.00121736
co-occurence of coordinated regulators	Coordinated Regulator	Coordinated Regulator	ceh-54	gei-3	M02188_2.00	M00711_2.00	AFD	39	12.5882	3.09813	5.97769e-11	0.000166772	2.83691e-06
co-occurence of coordinated regulators	Coordinated Regulator	Coordinated Regulator	ceh-54	egl-13	M02188_2.00	M00710_2.00	AFD	53	21.6041	2.45324	1.48244e-11	0.000449146	4.71289e-07
co-occurence of coordinated regulators	Coordinated Regulator	Coordinated Regulator	ceh-54	daf-19	M02188_2.00	M00709_2.00	AFD	33	7.46557	4.42029	5.35921e-13	0.000103136	0.00393273
co-occurence of coordinated regulators	Coordinated Regulator	Coordinated Regulator	ceh-54	ztf-3	M02188_2.00	M00640_2.00	AFD	42	12.3763	3.39359	5.02254e-13	0.0002137	7.04333e-05
co-occurence of coordinated regulators	Coordinated Regulator	Coordinated Regulator	ceh-54	ztf-9	M02188_2.00	M00636_2.00	AFD	36	9.83981	3.65861	5.7757e-12	0.000147244	0.0277147
co-occurence of coordinated regulators	Coordinated Regulator	Coordinated Regulator	ceh-54	ztf-11	M02188_2.00	M00650_2.00	AFD	57	23.7958	2.39538	3.04084e-12	8.8564e-05	2.02896e-09
co-occurence of coordinated regulators	Coordinated Regulator	Coordinated Regulator	ceh-54	dmd-8	M02188_2.00	M00660_2.00	AFD	55	26.7876	2.05319	3.25927e-09	3.28896e-05	7.58725e-10
co-occurence of coordinated regulators	Coordinated Regulator	Coordinated Regulator	ceh-54	nhr-6	M02188_2.00	M01298_2.00	AFD	49	15.9155	3.07876	6.26893e-14	5.88958e-06	6.19564e-06
co-occurence of coordinated regulators	Coordinated Regulator	Coordinated Regulator	ceh-54	nhr-36	M02188_2.00	M02418_2.00	AFD	38	12.0905	3.14295	7.89978e-11	4.70663e-07	0.000589596
co-occurence of coordinated regulators	Coordinated Regulator	Coordinated Regulator	ttx-1	dsc-1	M00396_2.00	M02063_2.00	AFD	28	4.93241	5.67674	1.89867e-13	1.13429e-06	0.000156585
co-occurence of coordinated regulators	Coordinated Regulator	Coordinated Regulator	ttx-1	gei-3	M00396_2.00	M00711_2.00	AFD	35	6.78691	5.15699	1.40312e-15	7.00196e-05	4.23976e-06
co-occurence of coordinated regulators	Coordinated Regulator	Coordinated Regulator	ttx-1	egl-13	M00396_2.00	M00710_2.00	AFD	44	11.6478	3.77755	3.26729e-15	4.30187e-06	7.68406e-08
co-occurence of coordinated regulators	Coordinated Regulator	Coordinated Regulator	ttx-1	daf-19	M00396_2.00	M00709_2.00	AFD	28	4.02504	6.95646	2.04409e-15	0.000488739	0.00108563
co-occurence of coordinated regulators	Coordinated Regulator	Coordinated Regulator	ttx-1	ztf-3	M00396_2.00	M00640_2.00	AFD	35	6.67261	5.24532	8.798e-16	2.10938e-06	2.24897e-05
co-occurence of coordinated regulators	Coordinated Regulator	Coordinated Regulator	ttx-1	ztf-9	M00396_2.00	M00636_2.00	AFD	34	5.3051	6.40893	1.26218e-17	1.48645e-05	0.00428072
co-occurence of coordinated regulators	Coordinated Regulator	Coordinated Regulator	ttx-1	ztf-11	M00396_2.00	M00650_2.00	AFD	46	12.8294	3.58551	3.37609e-15	3.27512e-05	1.53769e-09
co-occurence of coordinated regulators	Coordinated Regulator	Coordinated Regulator	ttx-1	dmd-8	M00396_2.00	M00660_2.00	AFD	49	14.4424	3.39278	1.89741e-15	3.22646e-05	5.28543e-08
co-occurence of coordinated regulators	Coordinated Regulator	Coordinated Regulator	ttx-1	nhr-6	M00396_2.00	M01298_2.00	AFD	41	8.58078	4.77812	2.93688e-17	2.67711e-05	1.53998e-06
co-occurence of coordinated regulators	Coordinated Regulator	Coordinated Regulator	ttx-1	nhr-36	M00396_2.00	M02418_2.00	AFD	34	6.51857	5.21587	2.90425e-15	1.18226e-06	1.75405e-05
co-occurence of coordinated regulators	Coordinated Regulator	Coordinated Regulator	dsc-1	gei-3	M02063_2.00	M00711_2.00	AFD	29	8.05823	3.5988	1.46284e-09	0.00152736	5.11337e-06
co-occurence of coordinated regulators	Coordinated Regulator	Coordinated Regulator	dsc-1	egl-13	M02063_2.00	M00710_2.00	AFD	40	13.8296	2.89234	2.13778e-10	0.0129346	9.84319e-08
co-occurence of coordinated regulators	Coordinated Regulator	Coordinated Regulator	dsc-1	daf-19	M02063_2.00	M00709_2.00	AFD	26	4.77901	5.44046	3.56593e-12	0.00439924	0.0282527
co-occurence of coordinated regulators	Coordinated Regulator	Coordinated Regulator	dsc-1	ztf-3	M02063_2.00	M00640_2.00	AFD	31	7.92253	3.91289	5.20569e-11	0.012688	1.23753e-05
co-occurence of coordinated regulators	Coordinated Regulator	Coordinated Regulator	dsc-1	ztf-9	M02063_2.00	M00636_2.00	AFD	30	6.29885	4.76277	1.35614e-12	0.013743	0.028283
co-occurence of coordinated regulators	Coordinated Regulator	Coordinated Regulator	dsc-1	ztf-11	M02063_2.00	M00650_2.00	AFD	41	15.2326	2.69159	8.93543e-10	0.016867	1.73718e-10
co-occurence of coordinated regulators	Coordinated Regulator	Coordinated Regulator	dsc-1	dmd-8	M02063_2.00	M00660_2.00	AFD	40	17.1478	2.33266	7.33994e-08	0.0385535	3.5906e-09
co-occurence of coordinated regulators	Coordinated Regulator	Coordinated Regulator	dsc-1	nhr-6	M02063_2.00	M01298_2.00	AFD	35	10.1881	3.43537	6.07024e-11	0.0266746	6.89252e-06
co-occurence of coordinated regulators	Coordinated Regulator	Coordinated Regulator	dsc-1	nhr-36	M02063_2.00	M02418_2.00	AFD	34	7.73963	4.39297	2.59504e-13	0.0286963	0.000454969
co-occurence of coordinated regulators	Coordinated Regulator	Coordinated Regulator	gei-3	egl-13	M00711_2.00	M00710_2.00	AFD	45	19.0293	2.36477	4.38962e-09	1.42205e-06	9.22957e-06
co-occurence of coordinated regulators	Coordinated Regulator	Coordinated Regulator	gei-3	daf-19	M00711_2.00	M00709_2.00	AFD	27	6.57583	4.10595	4.29864e-10	1.57739e-05	0.00143469
co-occurence of coordinated regulators	Coordinated Regulator	Coordinated Regulator	gei-3	ztf-3	M00711_2.00	M00640_2.00	AFD	34	10.9013	3.1189	1.30442e-09	3.40452e-07	2.5483e-05
co-occurence of coordinated regulators	Coordinated Regulator	Coordinated Regulator	gei-3	ztf-9	M00711_2.00	M00636_2.00	AFD	31	8.66711	3.57674	4.04329e-10	1.04191e-06	0.0328449
co-occurence of coordinated regulators	Coordinated Regulator	Coordinated Regulator	gei-3	ztf-11	M00711_2.00	M00650_2.00	AFD	48	20.9598	2.29009	2.57499e-09	2.00615e-05	6.10853e-08
co-occurence of coordinated regulators	Coordinated Regulator	Coordinated Regulator	gei-3	dmd-8	M00711_2.00	M00660_2.00	AFD	49	23.5951	2.07671	3.58475e-08	5.68073e-06	1.07555e-09
co-occurence of coordinated regulators	Coordinated Regulator	Coordinated Regulator	gei-3	nhr-6	M00711_2.00	M01298_2.00	AFD	38	14.0187	2.71067	4.02009e-09	3.11435e-05	4.26852e-06
co-occurence of coordinated regulators	Coordinated Regulator	Coordinated Regulator	gei-3	nhr-36	M00711_2.00	M02418_2.00	AFD	33	10.6496	3.09871	2.84317e-09	3.95727e-06	0.000125566
co-occurence of coordinated regulators	Coordinated Regulator	Coordinated Regulator	egl-13	daf-19	M00710_2.00	M00709_2.00	AFD	40	11.2855	3.54437	6.36522e-13	4.30187e-06	0.000437271
co-occurence of coordinated regulators	Coordinated Regulator	Coordinated Regulator	egl-13	ztf-3	M00710_2.00	M00640_2.00	AFD	50	18.7089	2.67253	4.58619e-12	1.8159e-06	5.21054e-05
co-occurence of coordinated regulators	Coordinated Regulator	Coordinated Regulator	egl-13	ztf-9	M00710_2.00	M00636_2.00	AFD	43	14.8746	2.89084	3.26244e-11	2.66895e-06	0.0119048
co-occurence of coordinated regulators	Coordinated Regulator	Coordinated Regulator	egl-13	ztf-11	M00710_2.00	M00650_2.00	AFD	72	35.9715	2.00158	4.78489e-13	2.6443e-06	2.56907e-09
co-occurence of coordinated regulators	Coordinated Regulator	Coordinated Regulator	egl-13	dmd-8	M00710_2.00	M00660_2.00	AFD	74	40.4941	1.82743	1.36237e-11	2.48533e-06	3.37269e-09
co-occurence of coordinated regulators	Coordinated Regulator	Coordinated Regulator	egl-13	nhr-6	M00710_2.00	M01298_2.00	AFD	52	24.059	2.16135	2.33429e-09	1.44865e-07	1.1098e-06
co-occurence of coordinated regulators	Coordinated Regulator	Coordinated Regulator	egl-13	nhr-36	M00710_2.00	M02418_2.00	AFD	44	18.2769	2.4074	4.30912e-09	6.94418e-09	0.000469101
co-occurence of coordinated regulators	Coordinated Regulator	Coordinated Regulator	daf-19	ztf-3	M00709_2.00	M00640_2.00	AFD	32	6.46509	4.94966	8.24921e-14	0.00093408	0.000224414
co-occurence of coordinated regulators	Coordinated Regulator	Coordinated Regulator	daf-19	ztf-9	M00709_2.00	M00636_2.00	AFD	27	5.14011	5.25281	2.73063e-12	0.00179469	0.0213049
co-occurence of coordinated regulators	Coordinated Regulator	Coordinated Regulator	daf-19	ztf-11	M00709_2.00	M00650_2.00	AFD	39	12.4304	3.13746	4.23519e-11	0.00210315	4.82469e-07
co-occurence of coordinated regulators	Coordinated Regulator	Coordinated Regulator	daf-19	dmd-8	M00709_2.00	M00660_2.00	AFD	41	13.9933	2.92998	7.89105e-11	0.000905344	2.62635e-09
co-occurence of coordinated regulators	Coordinated Regulator	Coordinated Regulator	daf-19	nhr-6	M00709_2.00	M01298_2.00	AFD	32	8.31391	3.84897	3.52977e-11	0.00105581	8.73569e-06
co-occurence of coordinated regulators	Coordinated Regulator	Coordinated Regulator	daf-19	nhr-36	M00709_2.00	M02418_2.00	AFD	30	6.31584	4.74996	1.44723e-12	0.0111086	0.00259981
co-occurence of coordinated regulators	Coordinated Regulator	Coordinated Regulator	ztf-3	ztf-9	M00640_2.00	M00636_2.00	AFD	35	8.52115	4.10743	6.1815e-13	4.59214e-06	0.00900229
co-occurence of coordinated regulators	Coordinated Regulator	Coordinated Regulator	ztf-3	ztf-11	M00640_2.00	M00650_2.00	AFD	51	20.6069	2.4749	3.62269e-11	0.00015476	4.12863e-10
co-occurence of coordinated regulators	Coordinated Regulator	Coordinated Regulator	ztf-3	dmd-8	M00640_2.00	M00660_2.00	AFD	52	23.1977	2.2416	6.62833e-10	2.82274e-05	4.16967e-11
co-occurence of coordinated regulators	Coordinated Regulator	Coordinated Regulator	ztf-3	nhr-6	M00640_2.00	M01298_2.00	AFD	42	13.7826	3.04732	1.29697e-11	4.05455e-05	3.42308e-06
co-occurence of coordinated regulators	Coordinated Regulator	Coordinated Regulator	ztf-3	nhr-36	M00640_2.00	M02418_2.00	AFD	38	10.4703	3.62933	1.53337e-12	4.07819e-05	0.000111988
co-occurence of coordinated regulators	Coordinated Regulator	Coordinated Regulator	ztf-9	ztf-11	M00636_2.00	M00650_2.00	AFD	45	16.3836	2.74665	4.41597e-11	0.00653511	3.5578e-10
co-occurence of coordinated regulators	Coordinated Regulator	Coordinated Regulator	ztf-9	dmd-8	M00636_2.00	M00660_2.00	AFD	45	18.4435	2.43989	1.71248e-09	0.00896582	2.3402e-08
co-occurence of coordinated regulators	Coordinated Regulator	Coordinated Regulator	ztf-9	nhr-6	M00636_2.00	M01298_2.00	AFD	37	10.9579	3.37655	2.30479e-11	0.00620609	2.16253e-06
co-occurence of coordinated regulators	Coordinated Regulator	Coordinated Regulator	ztf-9	nhr-36	M00636_2.00	M02418_2.00	AFD	35	8.32443	4.20449	3.36191e-13	0.0132991	4.69626e-05
co-occurence of coordinated regulators	Coordinated Regulator	Coordinated Regulator	ztf-11	dmd-8	M00650_2.00	M00660_2.00	AFD	78	44.6022	1.74879	9.52922e-12	9.28792e-10	8.9377e-09
co-occurence of coordinated regulators	Coordinated Regulator	Coordinated Regulator	ztf-11	nhr-6	M00650_2.00	M01298_2.00	AFD	58	26.4998	2.18869	5.87248e-11	8.33294e-09	5.90345e-06
co-occurence of coordinated regulators	Coordinated Regulator	Coordinated Regulator	ztf-11	nhr-36	M00650_2.00	M02418_2.00	AFD	48	20.1312	2.38436	7.05584e-10	6.34062e-09	0.000523237
co-occurence of coordinated regulators	Coordinated Regulator	Coordinated Regulator	dmd-8	nhr-6	M00660_2.00	M01298_2.00	AFD	59	29.8316	1.97777	1.85466e-09	9.214e-09	7.2105e-06
co-occurence of coordinated regulators	Coordinated Regulator	Coordinated Regulator	dmd-8	nhr-36	M00660_2.00	M02418_2.00	AFD	47	22.6622	2.07394	8.89731e-08	5.94076e-09	0.00030921
co-occurence of coordinated regulators	Coordinated Regulator	Coordinated Regulator	nhr-6	nhr-36	M01298_2.00	M02418_2.00	AFD	42	13.4644	3.11933	6.452e-12	3.57074e-06	0.000431781
co-occurence of coordinated regulators	Coordinated Regulator	Coordinated Regulator	ceh-38	ceh-48	M03716_2.00	M01905_2.00	AIA	33	12.5819	2.62281	5.48732e-09	0.00410664	0.00843282
co-occurence of coordinated regulators	Coordinated Regulator	Coordinated Regulator	ceh-38	ceh-74	M03716_2.00	M01248_2.00	AIA	22	5.89117	3.7344	2.57767e-08	0.00501828	0.0264171
co-occurence of coordinated regulators	Coordinated Regulator	Coordinated Regulator	ceh-38	ceh-58	M03716_2.00	M00676_2.00	AIA	26	8.51692	3.05275	4.06753e-08	0.000373422	0.000254661
co-occurence of coordinated regulators	Coordinated Regulator	Coordinated Regulator	ceh-38	ttx-3	M03716_2.00	M02085_2.00	AIA	19	6.43928	2.95064	8.97639e-06	0.00383542	0.00217856
co-occurence of coordinated regulators	Coordinated Regulator	Coordinated Regulator	ceh-38	ztf-3	M03716_2.00	M00640_2.00	AIA	28	8.65879	3.23371	2.55781e-09	0.00219724	0.00283348
co-occurence of coordinated regulators	Coordinated Regulator	Coordinated Regulator	ceh-38	ztf-9	M03716_2.00	M00636_2.00	AIA	22	6.88421	3.19572	3.48239e-07	0.00616403	2.66418e-05
co-occurence of coordinated regulators	Coordinated Regulator	Coordinated Regulator	ceh-38	ztf-11	M03716_2.00	M00650_2.00	AIA	33	16.6482	1.98219	4.511e-06	0.0105613	7.03431e-05
co-occurence of coordinated regulators	Coordinated Regulator	Coordinated Regulator	ceh-48	ceh-74	M01905_2.00	M01248_2.00	AIA	22	5.8498	3.76081	2.28987e-08	0.00954437	0.0113048
co-occurence of coordinated regulators	Coordinated Regulator	Coordinated Regulator	ceh-48	ceh-58	M01905_2.00	M00676_2.00	AIA	26	8.45711	3.07434	3.54843e-08	0.000708877	5.61206e-05
co-occurence of coordinated regulators	Coordinated Regulator	Coordinated Regulator	ceh-48	ttx-3	M01905_2.00	M02085_2.00	AIA	19	6.39406	2.97151	8.12906e-06	0.0181311	0.00217856
co-occurence of coordinated regulators	Coordinated Regulator	Coordinated Regulator	ceh-48	ztf-3	M01905_2.00	M00640_2.00	AIA	28	8.59798	3.25658	2.20326e-09	0.00511438	0.00272183
co-occurence of coordinated regulators	Coordinated Regulator	Coordinated Regulator	ceh-48	ztf-9	M01905_2.00	M00636_2.00	AIA	23	6.83586	3.36461	6.8069e-08	0.00438263	6.57041e-05
co-occurence of coordinated regulators	Coordinated Regulator	Coordinated Regulator	ceh-48	ztf-11	M01905_2.00	M00650_2.00	AIA	32	16.5313	1.93572	1.2895e-05	0.0227272	4.88383e-05
co-occurence of coordinated regulators	Coordinated Regulator	Coordinated Regulator	ceh-74	ceh-58	M01248_2.00	M00676_2.00	AIA	22	3.95983	5.5558	2.69698e-11	0.0251048	7.88087e-05
co-occurence of coordinated regulators	Coordinated Regulator	Coordinated Regulator	ceh-74	ztf-3	M01248_2.00	M00640_2.00	AIA	23	4.02578	5.71317	4.99178e-12	0.00525499	3.7177e-05
co-occurence of coordinated regulators	Coordinated Regulator	Coordinated Regulator	ceh-74	ztf-9	M01248_2.00	M00636_2.00	AIA	22	3.20072	6.87345	6.10512e-13	0.00178933	2.86999e-05
co-occurence of coordinated regulators	Coordinated Regulator	Coordinated Regulator	ceh-74	ztf-11	M01248_2.00	M00650_2.00	AIA	26	7.74037	3.35901	6.23546e-09	0.0325146	0.000453276
co-occurence of coordinated regulators	Coordinated Regulator	Coordinated Regulator	ceh-58	ttx-3	M00676_2.00	M02085_2.00	AIA	21	4.32824	4.85185	8.25342e-10	0.00145452	0.000527048
co-occurence of coordinated regulators	Coordinated Regulator	Coordinated Regulator	ceh-58	ztf-3	M00676_2.00	M00640_2.00	AIA	27	5.82011	4.63908	3.08732e-12	0.00035513	0.000620348
co-occurence of coordinated regulators	Coordinated Regulator	Coordinated Regulator	ceh-58	ztf-9	M00676_2.00	M00636_2.00	AIA	23	4.62731	4.97049	6.3781e-11	1.13446e-05	4.99279e-06
co-occurence of coordinated regulators	Coordinated Regulator	Coordinated Regulator	ceh-58	ztf-11	M00676_2.00	M00650_2.00	AIA	34	11.1903	3.03834	5.50654e-11	0.00668836	5.0624e-05
co-occurence of coordinated regulators	Coordinated Regulator	Coordinated Regulator	ttx-3	ztf-3	M02085_2.00	M00640_2.00	AIA	19	4.40034	4.31785	3.63508e-08	0.00327859	0.00165636
co-occurence of coordinated regulators	Coordinated Regulator	Coordinated Regulator	ttx-3	ztf-9	M02085_2.00	M00636_2.00	AIA	17	3.49851	4.85921	4.54964e-08	0.0180074	0.000696882
co-occurence of coordinated regulators	Coordinated Regulator	Coordinated Regulator	ttx-3	ztf-11	M02085_2.00	M00650_2.00	AIA	21	8.46052	2.48212	3.40791e-05	0.00102497	0.000256846
co-occurence of coordinated regulators	Coordinated Regulator	Coordinated Regulator	ztf-3	ztf-9	M00640_2.00	M00636_2.00	AIA	25	4.70439	5.31419	1.84766e-12	0.000713236	1.98204e-05
co-occurence of coordinated regulators	Coordinated Regulator	Coordinated Regulator	ztf-3	ztf-11	M00640_2.00	M00650_2.00	AIA	32	11.3767	2.81276	2.21433e-09	0.00349524	7.82502e-06
co-occurence of coordinated regulators	Coordinated Regulator	Coordinated Regulator	ztf-9	ztf-11	M00636_2.00	M00650_2.00	AIA	26	9.04512	2.87448	1.30579e-07	2.96241e-05	1.16817e-05
co-occurence of coordinated regulators	Coordinated Regulator	Coordinated Regulator	maf-1	ceh-38	M01814_2.00	M03716_2.00	AIB	22	8.80639	2.49819	1.90564e-05	0.0219626	0.00421352
co-occurence of coordinated regulators	Coordinated Regulator	Coordinated Regulator	maf-1	ceh-74	M01814_2.00	M01248_2.00	AIB	17	4.09441	4.152	3.89235e-07	0.000328576	0.000454994
co-occurence of coordinated regulators	Coordinated Regulator	Coordinated Regulator	maf-1	ceh-58	M01814_2.00	M00676_2.00	AIB	24	5.91933	4.05451	1.08468e-09	0.00392615	0.00216908
co-occurence of coordinated regulators	Coordinated Regulator	Coordinated Regulator	maf-1	unc-62	M01814_2.00	M02185_2.00	AIB	22	5.76337	3.81721	1.89333e-08	0.000422136	0.00222349
co-occurence of coordinated regulators	Coordinated Regulator	Coordinated Regulator	maf-1	ceh-18	M01814_2.00	M00681_2.00	AIB	24	8.31969	2.88472	5.24958e-07	0.000410765	0.000180481
co-occurence of coordinated regulators	Coordinated Regulator	Coordinated Regulator	maf-1	unc-42	M01814_2.00	M03874_2.00	AIB	19	5.44428	3.4899	8.61955e-07	0.0294085	4.70512e-05
co-occurence of coordinated regulators	Coordinated Regulator	Coordinated Regulator	maf-1	lim-7	M01814_2.00	M01242_2.00	AIB	21	6.683	3.1423	9.81663e-07	0.00460084	0.00192195
co-occurence of coordinated regulators	Coordinated Regulator	Coordinated Regulator	maf-1	tab-1	M01814_2.00	M00516_2.00	AIB	19	5.00239	3.79819	2.52802e-07	0.00831732	0.0340534
co-occurence of coordinated regulators	Coordinated Regulator	Coordinated Regulator	maf-1	ztf-3	M01814_2.00	M00640_2.00	AIB	21	6.01792	3.48958	1.879e-07	0.00234811	0.00234343
co-occurence of coordinated regulators	Coordinated Regulator	Coordinated Regulator	maf-1	ztf-9	M01814_2.00	M00636_2.00	AIB	20	4.78458	4.18009	2.51782e-08	0.00481611	0.00445187
co-occurence of coordinated regulators	Coordinated Regulator	Coordinated Regulator	maf-1	die-1	M01814_2.00	M00610_2.00	AIB	29	15.4724	1.87431	0.00010468	0.00809489	6.53151e-06
co-occurence of coordinated regulators	Coordinated Regulator	Coordinated Regulator	maf-1	ztf-11	M01814_2.00	M00650_2.00	AIB	28	11.5707	2.41991	1.14279e-06	0.0126878	1.65526e-05
co-occurence of coordinated regulators	Coordinated Regulator	Coordinated Regulator	maf-1	nhr-6	M01814_2.00	M01298_2.00	AIB	25	7.73887	3.23045	3.22951e-08	0.00500788	0.0012693
co-occurence of coordinated regulators	Coordinated Regulator	Coordinated Regulator	ceh-38	ceh-48	M03716_2.00	M01905_2.00	AIB	35	12.8193	2.73025	4.64479e-10	0.00264426	0.00444097
co-occurence of coordinated regulators	Coordinated Regulator	Coordinated Regulator	ceh-38	ceh-74	M03716_2.00	M01248_2.00	AIB	22	6.00233	3.66525	3.76171e-08	0.0039647	2.13401e-05
co-occurence of coordinated regulators	Coordinated Regulator	Coordinated Regulator	ceh-38	ceh-58	M03716_2.00	M00676_2.00	AIB	26	8.67762	2.99621	6.3819e-08	0.000286702	0.00110607
co-occurence of coordinated regulators	Coordinated Regulator	Coordinated Regulator	ceh-38	unc-62	M03716_2.00	M02185_2.00	AIB	26	8.44898	3.07729	3.80864e-08	0.000557164	0.000322745
co-occurence of coordinated regulators	Coordinated Regulator	Coordinated Regulator	ceh-38	ceh-18	M03716_2.00	M00681_2.00	AIB	28	12.1965	2.29574	3.25316e-06	0.000571559	3.19644e-05
co-occurence of coordinated regulators	Coordinated Regulator	Coordinated Regulator	ceh-38	unc-42	M03716_2.00	M03874_2.00	AIB	24	7.9812	3.00707	2.51869e-07	0.0111907	7.40258e-07
co-occurence of coordinated regulators	Coordinated Regulator	Coordinated Regulator	ceh-38	lim-7	M03716_2.00	M01242_2.00	AIB	25	9.79714	2.55176	2.47106e-06	0.00279318	0.000691949
co-occurence of coordinated regulators	Coordinated Regulator	Coordinated Regulator	ceh-38	tab-1	M03716_2.00	M00516_2.00	AIB	23	7.3334	3.13633	2.46182e-07	0.000774022	0.0167821
co-occurence of coordinated regulators	Coordinated Regulator	Coordinated Regulator	ceh-38	ztf-3	M03716_2.00	M00640_2.00	AIB	25	8.82216	2.83377	3.69652e-07	0.00304915	0.000126222
co-occurence of coordinated regulators	Coordinated Regulator	Coordinated Regulator	ceh-38	ztf-9	M03716_2.00	M00636_2.00	AIB	23	7.0141	3.27911	1.13796e-07	0.0103051	6.27574e-05
co-occurence of coordinated regulators	Coordinated Regulator	Coordinated Regulator	ceh-38	die-1	M03716_2.00	M00610_2.00	AIB	36	22.6822	1.58715	0.000233671	0.00228067	1.05071e-06
co-occurence of coordinated regulators	Coordinated Regulator	Coordinated Regulator	ceh-38	ztf-11	M03716_2.00	M00650_2.00	AIB	34	16.9624	2.00444	2.31977e-06	0.00366749	1.70001e-05
co-occurence of coordinated regulators	Coordinated Regulator	Coordinated Regulator	ceh-38	nhr-6	M03716_2.00	M01298_2.00	AIB	27	11.345	2.3799	2.8306e-06	0.00050187	7.26099e-05
co-occurence of coordinated regulators	Coordinated Regulator	Coordinated Regulator	ceh-48	ceh-74	M01905_2.00	M01248_2.00	AIB	23	5.96017	3.85895	6.58387e-09	0.00388489	2.08651e-05
co-occurence of coordinated regulators	Coordinated Regulator	Coordinated Regulator	ceh-48	ceh-58	M01905_2.00	M00676_2.00	AIB	29	8.61668	3.36557	5.14119e-10	0.0139511	0.00152246
co-occurence of coordinated regulators	Coordinated Regulator	Coordinated Regulator	ceh-48	unc-62	M01905_2.00	M02185_2.00	AIB	30	8.38965	3.57584	5.16175e-11	0.00801864	0.000809081
co-occurence of coordinated regulators	Coordinated Regulator	Coordinated Regulator	ceh-48	ceh-18	M01905_2.00	M00681_2.00	AIB	30	12.1108	2.47712	2.02561e-07	0.0180114	7.01758e-05
co-occurence of coordinated regulators	Coordinated Regulator	Coordinated Regulator	ceh-48	unc-42	M01905_2.00	M03874_2.00	AIB	26	7.92515	3.28069	1.08945e-08	0.020671	1.76539e-07
co-occurence of coordinated regulators	Coordinated Regulator	Coordinated Regulator	ceh-48	lim-7	M01905_2.00	M01242_2.00	AIB	29	9.72834	2.98098	7.33645e-09	0.0257417	0.000904253
co-occurence of coordinated regulators	Coordinated Regulator	Coordinated Regulator	ceh-48	tab-1	M01905_2.00	M00516_2.00	AIB	25	7.2819	3.43317	1.0215e-08	0.0046155	0.0152952
co-occurence of coordinated regulators	Coordinated Regulator	Coordinated Regulator	ceh-48	ztf-3	M01905_2.00	M00640_2.00	AIB	28	8.7602	3.19627	3.67097e-09	0.00583875	0.000218139
co-occurence of coordinated regulators	Coordinated Regulator	Coordinated Regulator	ceh-48	ztf-9	M01905_2.00	M00636_2.00	AIB	26	6.96484	3.73303	8.47925e-10	0.0432015	0.0001695
co-occurence of coordinated regulators	Coordinated Regulator	Coordinated Regulator	ceh-48	die-1	M01905_2.00	M00610_2.00	AIB	39	22.5229	1.73157	6.61629e-06	0.0133689	1.82364e-06
co-occurence of coordinated regulators	Coordinated Regulator	Coordinated Regulator	ceh-48	ztf-11	M01905_2.00	M00650_2.00	AIB	37	16.8432	2.19673	3.37536e-08	0.0112644	8.79807e-06
co-occurence of coordinated regulators	Coordinated Regulator	Coordinated Regulator	ceh-48	nhr-6	M01905_2.00	M01298_2.00	AIB	30	11.2654	2.66303	4.12239e-08	0.00306037	0.000115181
co-occurence of coordinated regulators	Coordinated Regulator	Coordinated Regulator	ceh-74	ceh-58	M01248_2.00	M00676_2.00	AIB	21	4.03454	5.20505	2.70757e-10	1.94518e-05	1.22938e-05
co-occurence of coordinated regulators	Coordinated Regulator	Coordinated Regulator	ceh-74	unc-62	M01248_2.00	M02185_2.00	AIB	23	3.92824	5.85504	3.44756e-12	3.05156e-06	0.000417643
co-occurence of coordinated regulators	Coordinated Regulator	Coordinated Regulator	ceh-74	ceh-18	M01248_2.00	M00681_2.00	AIB	23	5.67059	4.05601	2.72036e-09	9.45471e-06	1.14384e-06
co-occurence of coordinated regulators	Coordinated Regulator	Coordinated Regulator	ceh-74	unc-42	M01248_2.00	M03874_2.00	AIB	19	3.71075	5.12026	2.95566e-09	1.01426e-05	8.36933e-08
co-occurence of coordinated regulators	Coordinated Regulator	Coordinated Regulator	ceh-74	lim-7	M01248_2.00	M01242_2.00	AIB	20	4.55505	4.39073	1.16493e-08	1.43782e-05	0.000233027
co-occurence of coordinated regulators	Coordinated Regulator	Coordinated Regulator	ceh-74	tab-1	M01248_2.00	M00516_2.00	AIB	19	3.40957	5.57256	8.21425e-10	3.28998e-06	0.0022056
co-occurence of coordinated regulators	Coordinated Regulator	Coordinated Regulator	ceh-74	ztf-3	M01248_2.00	M00640_2.00	AIB	23	4.10174	5.60737	7.62334e-12	3.03221e-05	5.96159e-06
co-occurence of coordinated regulators	Coordinated Regulator	Coordinated Regulator	ceh-74	ztf-9	M01248_2.00	M00636_2.00	AIB	20	3.26111	6.13288	5.67168e-11	2.29956e-06	0.000252512
co-occurence of coordinated regulators	Coordinated Regulator	Coordinated Regulator	ceh-74	die-1	M01248_2.00	M00610_2.00	AIB	25	10.5458	2.37062	9.13782e-06	2.90816e-05	3.39787e-06
co-occurence of coordinated regulators	Coordinated Regulator	Coordinated Regulator	ceh-74	ztf-11	M01248_2.00	M00650_2.00	AIB	24	7.88642	3.04321	2.03514e-07	5.55361e-05	1.04292e-05
co-occurence of coordinated regulators	Coordinated Regulator	Coordinated Regulator	ceh-74	nhr-6	M01248_2.00	M01298_2.00	AIB	22	5.27472	4.17084	4.19957e-09	5.48005e-05	8.80272e-05
co-occurence of coordinated regulators	Coordinated Regulator	Coordinated Regulator	ceh-58	unc-62	M00676_2.00	M02185_2.00	AIB	28	5.67909	4.93036	2.96685e-13	0.000838812	0.00221642
co-occurence of coordinated regulators	Coordinated Regulator	Coordinated Regulator	ceh-58	ceh-18	M00676_2.00	M00681_2.00	AIB	31	8.19803	3.7814	5.16671e-12	0.00795367	0.000583091
co-occurence of coordinated regulators	Coordinated Regulator	Coordinated Regulator	ceh-58	unc-42	M00676_2.00	M03874_2.00	AIB	24	5.36467	4.47372	1.70308e-10	0.000315218	2.94775e-07
co-occurence of coordinated regulators	Coordinated Regulator	Coordinated Regulator	ceh-58	lim-7	M00676_2.00	M01242_2.00	AIB	28	6.58528	4.25191	7.78069e-12	0.00363789	0.0170283
co-occurence of coordinated regulators	Coordinated Regulator	Coordinated Regulator	ceh-58	tab-1	M00676_2.00	M00516_2.00	AIB	28	4.92924	5.68039	1.19898e-14	0.00520912	0.0214938
co-occurence of coordinated regulators	Coordinated Regulator	Coordinated Regulator	ceh-58	ztf-3	M00676_2.00	M00640_2.00	AIB	26	5.92993	4.38454	3.27789e-11	0.00122269	0.000185311
co-occurence of coordinated regulators	Coordinated Regulator	Coordinated Regulator	ceh-58	ztf-9	M00676_2.00	M00636_2.00	AIB	25	4.71462	5.30266	2.1311e-12	0.000306749	0.000111822
co-occurence of coordinated regulators	Coordinated Regulator	Coordinated Regulator	ceh-58	die-1	M00676_2.00	M00610_2.00	AIB	37	15.2461	2.42685	2.17551e-09	0.0104348	0.000165121
co-occurence of coordinated regulators	Coordinated Regulator	Coordinated Regulator	ceh-58	ztf-11	M00676_2.00	M00650_2.00	AIB	33	11.4015	2.89437	5.64835e-10	0.0066528	5.30169e-05
co-occurence of coordinated regulators	Coordinated Regulator	Coordinated Regulator	ceh-58	nhr-6	M00676_2.00	M01298_2.00	AIB	30	7.62571	3.93406	5.64887e-12	0.00380235	0.000409936
co-occurence of coordinated regulators	Coordinated Regulator	Coordinated Regulator	unc-62	ceh-18	M02185_2.00	M00681_2.00	AIB	30	7.98203	3.75844	1.63275e-11	0.000114361	3.3872e-06
co-occurence of coordinated regulators	Coordinated Regulator	Coordinated Regulator	unc-62	unc-42	M02185_2.00	M03874_2.00	AIB	23	5.22332	4.40333	6.25161e-10	0.000346094	1.3232e-08
co-occurence of coordinated regulators	Coordinated Regulator	Coordinated Regulator	unc-62	lim-7	M02185_2.00	M01242_2.00	AIB	29	6.41177	4.52293	6.56077e-13	0.00403705	0.000426936
co-occurence of coordinated regulators	Coordinated Regulator	Coordinated Regulator	unc-62	tab-1	M02185_2.00	M00516_2.00	AIB	25	4.79937	5.20902	3.0475e-12	0.000313769	0.0119716
co-occurence of coordinated regulators	Coordinated Regulator	Coordinated Regulator	unc-62	ztf-3	M02185_2.00	M00640_2.00	AIB	28	5.77369	4.84959	4.26105e-13	0.000111081	0.000138533
co-occurence of coordinated regulators	Coordinated Regulator	Coordinated Regulator	unc-62	ztf-9	M02185_2.00	M00636_2.00	AIB	26	4.5904	5.66399	1.67334e-13	0.000676208	0.00095428
co-occurence of coordinated regulators	Coordinated Regulator	Coordinated Regulator	unc-62	die-1	M02185_2.00	M00610_2.00	AIB	36	14.8444	2.42515	4.8616e-09	0.00073308	3.27516e-07
co-occurence of coordinated regulators	Coordinated Regulator	Coordinated Regulator	unc-62	ztf-11	M02185_2.00	M00650_2.00	AIB	33	11.1011	2.97269	2.88592e-10	0.000360755	1.84507e-06
co-occurence of coordinated regulators	Coordinated Regulator	Coordinated Regulator	unc-62	nhr-6	M02185_2.00	M01298_2.00	AIB	30	7.42479	4.04052	3.01534e-12	0.000895775	1.84027e-05
co-occurence of coordinated regulators	Coordinated Regulator	Coordinated Regulator	ceh-18	unc-42	M00681_2.00	M03874_2.00	AIB	23	7.5401	3.05036	3.95444e-07	4.48268e-05	1.45815e-07
co-occurence of coordinated regulators	Coordinated Regulator	Coordinated Regulator	ceh-18	lim-7	M00681_2.00	M01242_2.00	AIB	28	9.25568	3.02517	1.16367e-08	0.00250359	0.00223522
co-occurence of coordinated regulators	Coordinated Regulator	Coordinated Regulator	ceh-18	tab-1	M00681_2.00	M00516_2.00	AIB	24	6.92811	3.46415	1.95913e-08	9.14677e-05	0.0145987
co-occurence of coordinated regulators	Coordinated Regulator	Coordinated Regulator	ceh-18	ztf-3	M00681_2.00	M00640_2.00	AIB	29	8.33458	3.47948	2.44312e-10	0.000243936	0.000270127
co-occurence of coordinated regulators	Coordinated Regulator	Coordinated Regulator	ceh-18	ztf-9	M00681_2.00	M00636_2.00	AIB	26	6.62645	3.92367	3.097e-10	6.20626e-05	0.000444581
co-occurence of coordinated regulators	Coordinated Regulator	Coordinated Regulator	ceh-18	die-1	M00681_2.00	M00610_2.00	AIB	37	21.4286	1.72666	1.96082e-05	0.000673057	5.26558e-05
co-occurence of coordinated regulators	Coordinated Regulator	Coordinated Regulator	ceh-18	ztf-11	M00681_2.00	M00650_2.00	AIB	32	16.0249	1.99689	7.26446e-06	0.000129771	1.22445e-05
co-occurence of coordinated regulators	Coordinated Regulator	Coordinated Regulator	ceh-18	nhr-6	M00681_2.00	M01298_2.00	AIB	27	10.718	2.51912	9.46659e-07	2.64598e-05	2.90807e-05
co-occurence of coordinated regulators	Coordinated Regulator	Coordinated Regulator	unc-42	lim-7	M03874_2.00	M01242_2.00	AIB	21	6.05678	3.46719	2.08309e-07	2.05469e-06	0.00134248
co-occurence of coordinated regulators	Coordinated Regulator	Coordinated Regulator	unc-42	ztf-3	M03874_2.00	M00640_2.00	AIB	24	5.45402	4.40042	2.33179e-10	1.64126e-07	0.000139885
co-occurence of coordinated regulators	Coordinated Regulator	Coordinated Regulator	unc-42	ztf-9	M03874_2.00	M00636_2.00	AIB	21	4.33625	4.84289	9.06011e-10	8.96121e-07	0.00143641
co-occurence of coordinated regulators	Coordinated Regulator	Coordinated Regulator	unc-42	die-1	M03874_2.00	M00610_2.00	AIB	29	14.0225	2.0681	1.53536e-05	3.97101e-06	5.38707e-08
co-occurence of coordinated regulators	Coordinated Regulator	Coordinated Regulator	unc-42	ztf-11	M03874_2.00	M00650_2.00	AIB	28	10.4864	2.67011	1.55812e-07	7.18081e-07	1.89864e-06
co-occurence of coordinated regulators	Coordinated Regulator	Coordinated Regulator	unc-42	nhr-6	M03874_2.00	M01298_2.00	AIB	24	7.01371	3.42187	2.45407e-08	9.58348e-08	2.36348e-05
co-occurence of coordinated regulators	Coordinated Regulator	Coordinated Regulator	lim-7	tab-1	M01242_2.00	M00516_2.00	AIB	23	5.56518	4.13284	1.94661e-09	0.00590975	0.046988
co-occurence of coordinated regulators	Coordinated Regulator	Coordinated Regulator	lim-7	ztf-3	M01242_2.00	M00640_2.00	AIB	26	6.69496	3.88352	3.82337e-10	0.00121987	0.000392405
co-occurence of coordinated regulators	Coordinated Regulator	Coordinated Regulator	lim-7	ztf-9	M01242_2.00	M00636_2.00	AIB	25	5.32286	4.69672	2.36814e-11	0.000158787	0.000178566
co-occurence of coordinated regulators	Coordinated Regulator	Coordinated Regulator	lim-7	die-1	M01242_2.00	M00610_2.00	AIB	36	17.2131	2.09144	2.46182e-07	0.0130796	0.000653695
co-occurence of coordinated regulators	Coordinated Regulator	Coordinated Regulator	lim-7	ztf-11	M01242_2.00	M00650_2.00	AIB	31	12.8724	2.40825	1.97681e-07	0.00458319	2.83356e-05
co-occurence of coordinated regulators	Coordinated Regulator	Coordinated Regulator	lim-7	nhr-6	M01242_2.00	M01298_2.00	AIB	27	8.60952	3.13606	1.20787e-08	0.00194846	0.000277677
co-occurence of coordinated regulators	Coordinated Regulator	Coordinated Regulator	tab-1	ztf-3	M00516_2.00	M00640_2.00	AIB	23	5.01135	4.58959	2.94737e-10	0.0289477	0.000219787
co-occurence of coordinated regulators	Coordinated Regulator	Coordinated Regulator	tab-1	ztf-9	M00516_2.00	M00636_2.00	AIB	22	3.9843	5.52168	3.22799e-11	0.0151184	0.000324317
co-occurence of coordinated regulators	Coordinated Regulator	Coordinated Regulator	tab-1	die-1	M00516_2.00	M00610_2.00	AIB	30	12.8844	2.3284	7.70455e-07	0.0432617	5.60186e-05
co-occurence of coordinated regulators	Coordinated Regulator	Coordinated Regulator	tab-1	ztf-11	M00516_2.00	M00650_2.00	AIB	30	9.63531	3.11355	1.24419e-09	0.0432617	3.72352e-05
co-occurence of coordinated regulators	Coordinated Regulator	Coordinated Regulator	tab-1	nhr-6	M00516_2.00	M01298_2.00	AIB	28	6.44444	4.34483	4.85537e-12	0.0253719	0.000492552
co-occurence of coordinated regulators	Coordinated Regulator	Coordinated Regulator	ztf-3	ztf-9	M00640_2.00	M00636_2.00	AIB	25	4.79315	5.21578	2.97223e-12	0.000706573	0.000741315
co-occurence of coordinated regulators	Coordinated Regulator	Coordinated Regulator	ztf-3	die-1	M00640_2.00	M00610_2.00	AIB	33	15.5001	2.12902	9.79846e-07	0.000508164	2.75532e-06
co-occurence of coordinated regulators	Coordinated Regulator	Coordinated Regulator	ztf-3	ztf-11	M00640_2.00	M00650_2.00	AIB	32	11.5914	2.76067	4.05133e-09	0.0010148	2.0837e-06
co-occurence of coordinated regulators	Coordinated Regulator	Coordinated Regulator	ztf-3	nhr-6	M00640_2.00	M01298_2.00	AIB	28	7.75272	3.61163	2.70266e-10	0.000106509	1.40731e-05
co-occurence of coordinated regulators	Coordinated Regulator	Coordinated Regulator	ztf-9	die-1	M00636_2.00	M00610_2.00	AIB	29	12.3234	2.35325	1.11589e-06	0.000232383	9.76779e-06
co-occurence of coordinated regulators	Coordinated Regulator	Coordinated Regulator	ztf-9	ztf-11	M00636_2.00	M00650_2.00	AIB	28	9.21578	3.03827	1.06432e-08	0.000503216	9.95568e-06
co-occurence of coordinated regulators	Coordinated Regulator	Coordinated Regulator	ztf-9	nhr-6	M00636_2.00	M01298_2.00	AIB	25	6.16384	4.05591	4.17585e-10	0.000784224	1.79037e-05
co-occurence of coordinated regulators	Coordinated Regulator	Coordinated Regulator	die-1	ztf-11	M00610_2.00	M00650_2.00	AIB	45	29.8019	1.50997	1.4161e-05	1.42384e-06	5.80242e-06
co-occurence of coordinated regulators	Coordinated Regulator	Coordinated Regulator	die-1	nhr-6	M00610_2.00	M01298_2.00	AIB	37	19.9326	1.85625	3.04388e-06	4.73679e-05	0.000221906
co-occurence of coordinated regulators	Coordinated Regulator	Coordinated Regulator	ztf-11	nhr-6	M00650_2.00	M01298_2.00	AIB	36	14.9062	2.41511	5.43791e-09	1.04923e-06	6.72348e-05
co-occurence of coordinated regulators	Coordinated Regulator	Coordinated Regulator	atf-7	cey-1	M00595_2.00	M01903_2.00	AIM	26	4.48039	5.80307	2.10226e-13	0.00138741	0.00175033
co-occurence of coordinated regulators	Coordinated Regulator	Coordinated Regulator	atf-7	ceh-38	M00595_2.00	M03716_2.00	AIM	29	10.2634	2.82557	4.89676e-08	0.00374877	0.0204997
co-occurence of coordinated regulators	Coordinated Regulator	Coordinated Regulator	atf-7	ceh-48	M00595_2.00	M01905_2.00	AIM	28	10.1913	2.74743	1.67519e-07	0.00463326	0.0058918
co-occurence of coordinated regulators	Coordinated Regulator	Coordinated Regulator	atf-7	ceh-74	M00595_2.00	M01248_2.00	AIM	17	4.77184	3.56257	3.58715e-06	0.000657254	0.00332124
co-occurence of coordinated regulators	Coordinated Regulator	Coordinated Regulator	atf-7	unc-86	M00595_2.00	M03312_2.00	AIM	36	14.4712	2.48771	9.13445e-09	0.00182173	4.47169e-05
co-occurence of coordinated regulators	Coordinated Regulator	Coordinated Regulator	atf-7	unc-86	M00595_2.00	M02244_2.00	AIM	24	6.04836	3.96802	2.75215e-09	0.00334161	0.000189359
co-occurence of coordinated regulators	Coordinated Regulator	Coordinated Regulator	atf-7	lim-7	M00595_2.00	M01242_2.00	AIM	27	7.78871	3.46656	3.10192e-09	0.0149508	7.9999e-05
co-occurence of coordinated regulators	Coordinated Regulator	Coordinated Regulator	atf-7	ceh-14	M00595_2.00	M00435_2.00	AIM	34	12.0581	2.81969	1.54294e-09	0.00132556	5.26708e-07
co-occurence of coordinated regulators	Coordinated Regulator	Coordinated Regulator	atf-7	mls-2	M00595_2.00	M03233_2.00	AIM	31	8.90123	3.48267	1.01271e-10	0.00928366	0.0120105
co-occurence of coordinated regulators	Coordinated Regulator	Coordinated Regulator	atf-7	mbr-1	M00595_2.00	M00707_2.00	AIM	19	3.56007	5.33697	2.19448e-09	0.00411199	0.00333531
co-occurence of coordinated regulators	Coordinated Regulator	Coordinated Regulator	atf-7	daf-16	M00595_2.00	M01989_2.00	AIM	30	8.00285	3.74866	4.46742e-11	0.000426661	0.00099988
co-occurence of coordinated regulators	Coordinated Regulator	Coordinated Regulator	atf-7	ztf-3	M00595_2.00	M00640_2.00	AIM	27	7.0136	3.84967	3.64268e-10	0.00363789	0.0051209
co-occurence of coordinated regulators	Coordinated Regulator	Coordinated Regulator	atf-7	ztf-9	M00595_2.00	M00636_2.00	AIM	20	5.57619	3.58668	3.68298e-07	0.00149428	0.00134631
co-occurence of coordinated regulators	Coordinated Regulator	Coordinated Regulator	atf-7	ztf-11	M00595_2.00	M00650_2.00	AIM	33	13.485	2.44716	9.35909e-08	0.00165983	2.6724e-08
co-occurence of coordinated regulators	Coordinated Regulator	Coordinated Regulator	cey-1	ceh-38	M01903_2.00	M03716_2.00	AIM	25	6.47064	3.8636	1.92038e-09	4.38056e-05	0.00251731
co-occurence of coordinated regulators	Coordinated Regulator	Coordinated Regulator	cey-1	ceh-48	M01903_2.00	M01905_2.00	AIM	24	6.4252	3.73529	8.2837e-09	8.66511e-05	0.000201106
co-occurence of coordinated regulators	Coordinated Regulator	Coordinated Regulator	cey-1	ceh-74	M01903_2.00	M01248_2.00	AIM	16	3.00844	5.31837	4.8893e-08	0.000508809	0.0196621
co-occurence of coordinated regulators	Coordinated Regulator	Coordinated Regulator	cey-1	unc-86	M01903_2.00	M03312_2.00	AIM	29	9.12344	3.17862	4.00491e-09	0.000574008	1.67005e-05
co-occurence of coordinated regulators	Coordinated Regulator	Coordinated Regulator	cey-1	unc-86	M01903_2.00	M02244_2.00	AIM	21	3.81323	5.50714	1.5995e-10	8.38591e-05	0.000354872
co-occurence of coordinated regulators	Coordinated Regulator	Coordinated Regulator	cey-1	lim-7	M01903_2.00	M01242_2.00	AIM	23	4.91044	4.68389	3.39753e-10	0.000474796	1.22389e-05
co-occurence of coordinated regulators	Coordinated Regulator	Coordinated Regulator	cey-1	ceh-14	M01903_2.00	M00435_2.00	AIM	27	7.6021	3.55165	1.89631e-09	0.000402992	2.06468e-07
co-occurence of coordinated regulators	Coordinated Regulator	Coordinated Regulator	cey-1	mls-2	M01903_2.00	M03233_2.00	AIM	28	5.61184	4.98945	5.37844e-13	0.00112679	0.00548935
co-occurence of coordinated regulators	Coordinated Regulator	Coordinated Regulator	cey-1	mbr-1	M01903_2.00	M00707_2.00	AIM	19	2.24447	8.46524	1.79442e-12	0.00576841	0.00642712
co-occurence of coordinated regulators	Coordinated Regulator	Coordinated Regulator	cey-1	daf-16	M01903_2.00	M01989_2.00	AIM	26	5.04546	5.15315	2.43029e-12	0.000447574	0.00279947
co-occurence of coordinated regulators	Coordinated Regulator	Coordinated Regulator	cey-1	ztf-3	M01903_2.00	M00640_2.00	AIM	26	4.42177	5.88	1.60413e-13	6.40965e-05	0.000838171
co-occurence of coordinated regulators	Coordinated Regulator	Coordinated Regulator	cey-1	ztf-9	M01903_2.00	M00636_2.00	AIM	19	3.51555	5.40456	1.81583e-09	0.000240942	0.00211328
co-occurence of coordinated regulators	Coordinated Regulator	Coordinated Regulator	cey-1	ztf-11	M01903_2.00	M00650_2.00	AIM	28	8.50173	3.29345	4.05284e-09	0.000164051	5.99546e-08
co-occurence of coordinated regulators	Coordinated Regulator	Coordinated Regulator	ceh-38	ceh-48	M03716_2.00	M01905_2.00	AIM	38	14.7185	2.58179	8.19902e-10	0.0198929	0.01078
co-occurence of coordinated regulators	Coordinated Regulator	Coordinated Regulator	ceh-38	ceh-74	M03716_2.00	M01248_2.00	AIM	20	6.89156	2.9021	8.39077e-06	0.00119975	0.0297269
co-occurence of coordinated regulators	Coordinated Regulator	Coordinated Regulator	ceh-38	unc-86	M03716_2.00	M03312_2.00	AIM	40	20.8995	1.91392	9.52043e-07	0.00622241	1.41579e-05
co-occurence of coordinated regulators	Coordinated Regulator	Coordinated Regulator	ceh-38	unc-86	M03716_2.00	M02244_2.00	AIM	26	8.73514	2.97648	1.28125e-07	0.0194103	0.000505827
co-occurence of coordinated regulators	Coordinated Regulator	Coordinated Regulator	ceh-38	lim-7	M03716_2.00	M01242_2.00	AIM	28	11.2486	2.48921	1.1914e-06	0.0176236	0.000702047
co-occurence of coordinated regulators	Coordinated Regulator	Coordinated Regulator	ceh-38	ceh-14	M03716_2.00	M00435_2.00	AIM	38	17.4145	2.18209	8.1846e-08	0.00770051	4.25881e-06
co-occurence of coordinated regulators	Coordinated Regulator	Coordinated Regulator	ceh-38	mls-2	M03716_2.00	M03233_2.00	AIM	33	12.8553	2.56704	3.03345e-08	0.00812692	0.000880818
co-occurence of coordinated regulators	Coordinated Regulator	Coordinated Regulator	ceh-38	daf-16	M03716_2.00	M01989_2.00	AIM	31	11.5578	2.68216	4.05795e-08	0.00889203	0.000658285
co-occurence of coordinated regulators	Coordinated Regulator	Coordinated Regulator	ceh-38	ztf-3	M03716_2.00	M00640_2.00	AIM	30	10.1291	2.96175	8.92124e-09	0.0193241	0.00541384
co-occurence of coordinated regulators	Coordinated Regulator	Coordinated Regulator	ceh-38	ztf-9	M03716_2.00	M00636_2.00	AIM	21	8.05323	2.60765	2.29265e-05	0.0188779	0.000913162
co-occurence of coordinated regulators	Coordinated Regulator	Coordinated Regulator	ceh-38	ztf-11	M03716_2.00	M00650_2.00	AIM	37	19.4753	1.89984	5.01711e-06	0.0199851	1.43027e-06
co-occurence of coordinated regulators	Coordinated Regulator	Coordinated Regulator	ceh-48	ceh-74	M01905_2.00	M01248_2.00	AIM	19	6.84316	2.77649	2.74804e-05	0.0021879	0.0214943
co-occurence of coordinated regulators	Coordinated Regulator	Coordinated Regulator	ceh-48	unc-86	M01905_2.00	M03312_2.00	AIM	38	20.7527	1.83109	8.04614e-06	0.0203819	0.00013086
co-occurence of coordinated regulators	Coordinated Regulator	Coordinated Regulator	ceh-48	unc-86	M01905_2.00	M02244_2.00	AIM	24	8.6738	2.76695	1.68497e-06	0.0047505	0.00134474
co-occurence of coordinated regulators	Coordinated Regulator	Coordinated Regulator	ceh-48	ceh-14	M01905_2.00	M00435_2.00	AIM	36	17.2922	2.08187	8.50285e-07	0.0455969	5.70427e-05
co-occurence of coordinated regulators	Coordinated Regulator	Coordinated Regulator	ceh-48	mls-2	M01905_2.00	M03233_2.00	AIM	31	12.765	2.42851	3.65416e-07	0.0232088	0.00334725
co-occurence of coordinated regulators	Coordinated Regulator	Coordinated Regulator	ceh-48	mbr-1	M01905_2.00	M00707_2.00	AIM	18	5.10541	3.52567	2.02105e-06	0.00898784	0.0190641
co-occurence of coordinated regulators	Coordinated Regulator	Coordinated Regulator	ceh-48	daf-16	M01905_2.00	M01989_2.00	AIM	29	11.4767	2.52686	5.00898e-07	0.00548257	0.00153796
co-occurence of coordinated regulators	Coordinated Regulator	Coordinated Regulator	ceh-48	ztf-3	M01905_2.00	M00640_2.00	AIM	30	10.058	2.9827	7.63872e-09	0.0264239	0.00646827
co-occurence of coordinated regulators	Coordinated Regulator	Coordinated Regulator	ceh-48	ztf-9	M01905_2.00	M00636_2.00	AIM	21	7.99667	2.62609	2.06622e-05	0.00520927	0.000913162
co-occurence of coordinated regulators	Coordinated Regulator	Coordinated Regulator	ceh-48	ztf-11	M01905_2.00	M00650_2.00	AIM	36	19.3385	1.86157	1.28937e-05	0.0268576	1.69173e-06
co-occurence of coordinated regulators	Coordinated Regulator	Coordinated Regulator	ceh-74	unc-86	M01248_2.00	M03312_2.00	AIM	22	9.71692	2.26409	0.000114526	0.0134887	6.52359e-06
co-occurence of coordinated regulators	Coordinated Regulator	Coordinated Regulator	ceh-74	unc-86	M01248_2.00	M02244_2.00	AIM	13	4.06129	3.20096	0.000169622	0.0257014	0.000378157
co-occurence of coordinated regulators	Coordinated Regulator	Coordinated Regulator	ceh-74	lim-7	M01248_2.00	M01242_2.00	AIM	15	5.22987	2.86814	0.000164627	0.00228766	0.00172161
co-occurence of coordinated regulators	Coordinated Regulator	Coordinated Regulator	ceh-74	ceh-14	M01248_2.00	M00435_2.00	AIM	20	8.09662	2.47017	8.15432e-05	0.0317877	3.39452e-05
co-occurence of coordinated regulators	Coordinated Regulator	Coordinated Regulator	ceh-74	mls-2	M01248_2.00	M03233_2.00	AIM	17	5.97689	2.84429	6.06057e-05	0.00600246	3.75002e-05
co-occurence of coordinated regulators	Coordinated Regulator	Coordinated Regulator	ceh-74	daf-16	M01248_2.00	M01989_2.00	AIM	20	5.37366	3.72186	2.10687e-07	0.00699489	0.00280732
co-occurence of coordinated regulators	Coordinated Regulator	Coordinated Regulator	ceh-74	ztf-3	M01248_2.00	M00640_2.00	AIM	18	4.70941	3.82214	6.70467e-07	0.0492177	0.00230758
co-occurence of coordinated regulators	Coordinated Regulator	Coordinated Regulator	ceh-74	ztf-9	M01248_2.00	M00636_2.00	AIM	16	3.74424	4.27323	7.80001e-07	0.00148028	0.00173056
co-occurence of coordinated regulators	Coordinated Regulator	Coordinated Regulator	ceh-74	ztf-11	M01248_2.00	M00650_2.00	AIM	20	9.05477	2.20878	0.000367115	0.0182028	3.75855e-05
co-occurence of coordinated regulators	Coordinated Regulator	Coordinated Regulator	unc-86	unc-86	M03312_2.00	M02244_2.00	AIM	29	12.3163	2.3546	2.09474e-06	0.000111081	0.000339353
co-occurence of coordinated regulators	Coordinated Regulator	Coordinated Regulator	unc-86	lim-7	M03312_2.00	M01242_2.00	AIM	36	15.8602	2.26983	9.64268e-08	0.000340869	0.000944302
co-occurence of coordinated regulators	Coordinated Regulator	Coordinated Regulator	unc-86	ceh-14	M03312_2.00	M00435_2.00	AIM	48	24.554	1.95488	3.25085e-09	0.000452112	4.52927e-05
co-occurence of coordinated regulators	Coordinated Regulator	Coordinated Regulator	unc-86	mls-2	M03312_2.00	M03233_2.00	AIM	40	18.1256	2.20682	1.7238e-08	7.54101e-05	0.00570363
co-occurence of coordinated regulators	Coordinated Regulator	Coordinated Regulator	unc-86	mbr-1	M03312_2.00	M00707_2.00	AIM	21	7.2494	2.89679	4.75378e-06	0.00077998	0.0117975
co-occurence of coordinated regulators	Coordinated Regulator	Coordinated Regulator	unc-86	daf-16	M03312_2.00	M01989_2.00	AIM	37	16.2963	2.27046	5.22918e-08	8.56559e-06	0.00157402
co-occurence of coordinated regulators	Coordinated Regulator	Coordinated Regulator	unc-86	ztf-3	M03312_2.00	M00640_2.00	AIM	35	14.2818	2.45067	2.58869e-08	0.000136306	0.00676298
co-occurence of coordinated regulators	Coordinated Regulator	Coordinated Regulator	unc-86	ztf-9	M03312_2.00	M00636_2.00	AIM	24	11.3548	2.11363	0.000142956	2.17653e-05	0.000923897
co-occurence of coordinated regulators	Coordinated Regulator	Coordinated Regulator	unc-86	ztf-11	M03312_2.00	M00650_2.00	AIM	44	27.4597	1.60235	2.21251e-05	1.28305e-05	2.88242e-07
co-occurence of coordinated regulators	Coordinated Regulator	Coordinated Regulator	unc-86	lim-7	M02244_2.00	M01242_2.00	AIM	23	6.62893	3.46964	6.68281e-08	0.00709072	0.000252797
co-occurence of coordinated regulators	Coordinated Regulator	Coordinated Regulator	unc-86	ceh-14	M02244_2.00	M00435_2.00	AIM	26	10.2626	2.53348	2.56819e-06	0.00152419	2.10045e-07
co-occurence of coordinated regulators	Coordinated Regulator	Coordinated Regulator	unc-86	mls-2	M02244_2.00	M03233_2.00	AIM	26	7.57579	3.43198	8.29521e-09	0.000924326	0.000942384
co-occurence of coordinated regulators	Coordinated Regulator	Coordinated Regulator	unc-86	mbr-1	M02244_2.00	M00707_2.00	AIM	17	3.02996	5.61063	8.60999e-09	0.00487453	0.00364138
co-occurence of coordinated regulators	Coordinated Regulator	Coordinated Regulator	unc-86	daf-16	M02244_2.00	M01989_2.00	AIM	24	6.81119	3.52361	2.3823e-08	0.000457708	2.85075e-05
co-occurence of coordinated regulators	Coordinated Regulator	Coordinated Regulator	unc-86	ztf-3	M02244_2.00	M00640_2.00	AIM	23	5.96924	3.85309	1.08208e-08	0.00206353	0.000953644
co-occurence of coordinated regulators	Coordinated Regulator	Coordinated Regulator	unc-86	ztf-9	M02244_2.00	M00636_2.00	AIM	19	4.74587	4.00348	1.57223e-07	0.00124522	0.00121061
co-occurence of coordinated regulators	Coordinated Regulator	Coordinated Regulator	unc-86	ztf-11	M02244_2.00	M00650_2.00	AIM	28	11.477	2.43965	1.76714e-06	0.000371549	4.66989e-08
co-occurence of coordinated regulators	Coordinated Regulator	Coordinated Regulator	lim-7	ceh-14	M01242_2.00	M00435_2.00	AIM	35	13.2155	2.64841	3.63965e-09	0.0014006	1.81607e-05
co-occurence of coordinated regulators	Coordinated Regulator	Coordinated Regulator	lim-7	mls-2	M01242_2.00	M03233_2.00	AIM	33	9.75563	3.38266	3.6459e-11	0.000380289	0.00470234
co-occurence of coordinated regulators	Coordinated Regulator	Coordinated Regulator	lim-7	mbr-1	M01242_2.00	M00707_2.00	AIM	17	3.90179	4.35697	2.60202e-07	0.000114456	0.0112584
co-occurence of coordinated regulators	Coordinated Regulator	Coordinated Regulator	lim-7	daf-16	M01242_2.00	M01989_2.00	AIM	27	8.77102	3.07832	3.3524e-08	0.000387552	0.00218994
co-occurence of coordinated regulators	Coordinated Regulator	Coordinated Regulator	lim-7	ztf-3	M01242_2.00	M00640_2.00	AIM	27	7.68681	3.51251	2.37404e-09	0.000118736	0.00888426
co-occurence of coordinated regulators	Coordinated Regulator	Coordinated Regulator	lim-7	ztf-9	M01242_2.00	M00636_2.00	AIM	21	6.11144	3.43618	3.42312e-07	0.00152419	0.0044289
co-occurence of coordinated regulators	Coordinated Regulator	Coordinated Regulator	lim-7	ztf-11	M01242_2.00	M00650_2.00	AIM	33	14.7794	2.23283	7.84457e-07	0.00117367	2.19116e-06
co-occurence of coordinated regulators	Coordinated Regulator	Coordinated Regulator	ceh-14	mls-2	M00435_2.00	M03233_2.00	AIM	37	15.1032	2.44982	6.9703e-09	5.91714e-06	0.00248156
co-occurence of coordinated regulators	Coordinated Regulator	Coordinated Regulator	ceh-14	mbr-1	M00435_2.00	M00707_2.00	AIM	20	6.04056	3.31095	1.2163e-06	9.08684e-05	0.0128639
co-occurence of coordinated regulators	Coordinated Regulator	Coordinated Regulator	ceh-14	daf-16	M00435_2.00	M01989_2.00	AIM	35	13.5789	2.57754	7.24666e-09	5.26937e-06	0.000785719
co-occurence of coordinated regulators	Coordinated Regulator	Coordinated Regulator	ceh-14	ztf-3	M00435_2.00	M00640_2.00	AIM	32	11.9003	2.689	1.97447e-08	2.77551e-05	0.00532525
co-occurence of coordinated regulators	Coordinated Regulator	Coordinated Regulator	ceh-14	ztf-9	M00435_2.00	M00636_2.00	AIM	22	9.46142	2.32523	7.71855e-05	1.19556e-06	0.00178301
co-occurence of coordinated regulators	Coordinated Regulator	Coordinated Regulator	ceh-14	ztf-11	M00435_2.00	M00650_2.00	AIM	42	22.8807	1.8356	1.092e-06	7.56133e-06	8.82603e-07
co-occurence of coordinated regulators	Coordinated Regulator	Coordinated Regulator	mls-2	mbr-1	M03233_2.00	M00707_2.00	AIM	18	4.45912	4.03667	3.16328e-07	0.00564449	0.0031206
co-occurence of coordinated regulators	Coordinated Regulator	Coordinated Regulator	mls-2	daf-16	M03233_2.00	M01989_2.00	AIM	32	10.0239	3.19238	3.47759e-10	0.00367132	0.000730076
co-occurence of coordinated regulators	Coordinated Regulator	Coordinated Regulator	mls-2	ztf-3	M03233_2.00	M00640_2.00	AIM	29	8.78478	3.30116	1.77539e-09	0.00205567	0.00537042
co-occurence of coordinated regulators	Coordinated Regulator	Coordinated Regulator	mls-2	ztf-9	M03233_2.00	M00636_2.00	AIM	21	6.98438	3.00671	2.70278e-06	0.000460346	0.000711162
co-occurence of coordinated regulators	Coordinated Regulator	Coordinated Regulator	mls-2	ztf-11	M03233_2.00	M00650_2.00	AIM	39	16.8905	2.30899	9.19605e-09	0.00162565	8.76384e-07
co-occurence of coordinated regulators	Coordinated Regulator	Coordinated Regulator	mbr-1	daf-16	M00707_2.00	M01989_2.00	AIM	21	4.00907	5.23812	3.70176e-10	0.015229	0.0103289
co-occurence of coordinated regulators	Coordinated Regulator	Coordinated Regulator	mbr-1	ztf-3	M00707_2.00	M00640_2.00	AIM	18	3.5135	5.1231	1.09869e-08	0.0121345	0.00411797
co-occurence of coordinated regulators	Coordinated Regulator	Coordinated Regulator	mbr-1	ztf-9	M00707_2.00	M00636_2.00	AIM	16	2.79343	5.72774	1.88476e-08	0.00735898	0.00366222
co-occurence of coordinated regulators	Coordinated Regulator	Coordinated Regulator	mbr-1	ztf-11	M00707_2.00	M00650_2.00	AIM	20	6.7554	2.96059	6.27845e-06	0.00872896	7.82978e-06
co-occurence of coordinated regulators	Coordinated Regulator	Coordinated Regulator	daf-16	ztf-3	M01989_2.00	M00640_2.00	AIM	28	7.89816	3.54513	8.69951e-10	0.0126483	0.0104459
co-occurence of coordinated regulators	Coordinated Regulator	Coordinated Regulator	daf-16	ztf-9	M01989_2.00	M00636_2.00	AIM	22	6.27947	3.50348	1.19904e-07	0.000460346	0.00142844
co-occurence of coordinated regulators	Coordinated Regulator	Coordinated Regulator	daf-16	ztf-11	M01989_2.00	M00650_2.00	AIM	34	15.1858	2.23894	4.28203e-07	0.00141186	1.59321e-08
co-occurence of coordinated regulators	Coordinated Regulator	Coordinated Regulator	ztf-3	ztf-9	M00640_2.00	M00636_2.00	AIM	18	5.50324	3.2708	5.53454e-06	0.00430787	0.00460598
co-occurence of coordinated regulators	Coordinated Regulator	Coordinated Regulator	ztf-3	ztf-11	M00640_2.00	M00650_2.00	AIM	31	13.3086	2.32932	9.02599e-07	0.00244727	7.77792e-08
co-occurence of coordinated regulators	Coordinated Regulator	Coordinated Regulator	ztf-9	ztf-11	M00636_2.00	M00650_2.00	AIM	23	10.5811	2.17369	0.000138675	0.00303336	2.13104e-06
co-occurence of coordinated regulators	Coordinated Regulator	Coordinated Regulator	ceh-74	ceh-5	M01248_2.00	M02179_2.00	AIN	21	2.95959	7.09559	1.06074e-12	0.0223713	5.44094e-06
co-occurence of coordinated regulators	Coordinated Regulator	Coordinated Regulator	ceh-74	ceh-18	M01248_2.00	M00681_2.00	AIN	23	5.25055	4.38049	4.94634e-10	0.0419857	1.36346e-05
co-occurence of coordinated regulators	Coordinated Regulator	Coordinated Regulator	ceh-74	ttx-3	M01248_2.00	M02085_2.00	AIN	20	2.82439	7.08117	4.2752e-12	0.0236705	2.57717e-05
co-occurence of coordinated regulators	Coordinated Regulator	Coordinated Regulator	ceh-74	mbr-1	M01248_2.00	M00707_2.00	AIN	22	1.9278	11.4119	4.57083e-17	0.0204563	0.00164625
co-occurence of coordinated regulators	Coordinated Regulator	Coordinated Regulator	ceh-74	ztf-3	M01248_2.00	M00640_2.00	AIN	21	3.79791	5.52936	7.40546e-11	0.0029285	0.000111945
co-occurence of coordinated regulators	Coordinated Regulator	Coordinated Regulator	ceh-74	ztf-9	M01248_2.00	M00636_2.00	AIN	21	3.01955	6.95468	1.5036e-12	0.00218258	0.000157714
co-occurence of coordinated regulators	Coordinated Regulator	Coordinated Regulator	ceh-74	ztf-11	M01248_2.00	M00650_2.00	AIN	25	7.30224	3.42361	7.45069e-09	0.0388637	0.000137059
co-occurence of coordinated regulators	Coordinated Regulator	Coordinated Regulator	ceh-74	nhr-67	M01248_2.00	M02408_2.00	AIN	18	3.42966	5.24834	4.84104e-09	0.0117711	0.00937145
co-occurence of coordinated regulators	Coordinated Regulator	Coordinated Regulator	ceh-58	ceh-5	M00676_2.00	M02179_2.00	AIN	26	4.2787	6.07661	2.27713e-14	0.000530644	2.25035e-05
co-occurence of coordinated regulators	Coordinated Regulator	Coordinated Regulator	ceh-58	ceh-18	M00676_2.00	M00681_2.00	AIN	28	7.59077	3.68869	1.00605e-10	0.00220194	0.00013086
co-occurence of coordinated regulators	Coordinated Regulator	Coordinated Regulator	ceh-58	ttx-3	M00676_2.00	M02085_2.00	AIN	24	4.08325	5.87767	6.3064e-13	0.000346094	0.000272747
co-occurence of coordinated regulators	Coordinated Regulator	Coordinated Regulator	ceh-58	mbr-1	M00676_2.00	M00707_2.00	AIN	23	2.78704	8.25247	3.6831e-15	0.0005741	0.00252708
co-occurence of coordinated regulators	Coordinated Regulator	Coordinated Regulator	ceh-58	ztf-3	M00676_2.00	M00640_2.00	AIN	25	5.49067	4.55318	2.89066e-11	0.000457435	0.00166454
co-occurence of coordinated regulators	Coordinated Regulator	Coordinated Regulator	ceh-58	ztf-9	M00676_2.00	M00636_2.00	AIN	23	4.36539	5.26872	1.69268e-11	3.34227e-05	0.000951155
co-occurence of coordinated regulators	Coordinated Regulator	Coordinated Regulator	ceh-58	ztf-11	M00676_2.00	M00650_2.00	AIN	34	10.5569	3.22064	5.96902e-12	0.00041114	3.71638e-05
co-occurence of coordinated regulators	Coordinated Regulator	Coordinated Regulator	ceh-58	nhr-67	M00676_2.00	M02408_2.00	AIN	23	4.95829	4.6387	1.73365e-10	0.000743619	0.00339539
co-occurence of coordinated regulators	Coordinated Regulator	Coordinated Regulator	ceh-5	ceh-18	M02179_2.00	M00681_2.00	AIN	26	6.01377	4.32341	2.78017e-11	3.05092e-05	8.32817e-05
co-occurence of coordinated regulators	Coordinated Regulator	Coordinated Regulator	ceh-5	ttx-3	M02179_2.00	M02085_2.00	AIN	24	3.23494	7.41899	6.41439e-15	3.38671e-06	0.000176251
co-occurence of coordinated regulators	Coordinated Regulator	Coordinated Regulator	ceh-5	mbr-1	M02179_2.00	M00707_2.00	AIN	21	2.20803	9.51075	6.3768e-15	4.86554e-05	0.00121538
co-occurence of coordinated regulators	Coordinated Regulator	Coordinated Regulator	ceh-5	ztf-3	M02179_2.00	M00640_2.00	AIN	24	4.34997	5.51728	2.14435e-12	1.01114e-05	0.00161302
co-occurence of coordinated regulators	Coordinated Regulator	Coordinated Regulator	ceh-5	ztf-9	M02179_2.00	M00636_2.00	AIN	22	3.45847	6.3612	1.90129e-12	1.47146e-05	0.00106462
co-occurence of coordinated regulators	Coordinated Regulator	Coordinated Regulator	ceh-5	ztf-11	M02179_2.00	M00650_2.00	AIN	29	8.36368	3.46737	1.49054e-10	1.65093e-05	1.29934e-05
co-occurence of coordinated regulators	Coordinated Regulator	Coordinated Regulator	ceh-18	ttx-3	M00681_2.00	M02085_2.00	AIN	24	5.73905	4.18187	4.23544e-10	4.09774e-05	0.000433939
co-occurence of coordinated regulators	Coordinated Regulator	Coordinated Regulator	ceh-18	mbr-1	M00681_2.00	M00707_2.00	AIN	24	3.91722	6.12679	2.83606e-13	1.92421e-05	0.000312229
co-occurence of coordinated regulators	Coordinated Regulator	Coordinated Regulator	ceh-18	ztf-3	M00681_2.00	M00640_2.00	AIN	26	7.71721	3.36909	4.2908e-09	0.000813631	0.00035185
co-occurence of coordinated regulators	Coordinated Regulator	Coordinated Regulator	ceh-18	ztf-9	M00681_2.00	M00636_2.00	AIN	22	6.1356	3.58563	4.15442e-08	1.21568e-05	0.0154994
co-occurence of coordinated regulators	Coordinated Regulator	Coordinated Regulator	ceh-18	ztf-11	M00681_2.00	M00650_2.00	AIN	29	14.8379	1.95446	3.25082e-05	1.78355e-05	2.22476e-05
co-occurence of coordinated regulators	Coordinated Regulator	Coordinated Regulator	ceh-18	nhr-67	M00681_2.00	M02408_2.00	AIN	21	6.96893	3.01337	1.51545e-06	3.7812e-05	0.00731255
co-occurence of coordinated regulators	Coordinated Regulator	Coordinated Regulator	ttx-3	mbr-1	M02085_2.00	M00707_2.00	AIN	22	2.10716	10.4406	2.27503e-16	0.000928834	0.00292353
co-occurence of coordinated regulators	Coordinated Regulator	Coordinated Regulator	ttx-3	ztf-3	M02085_2.00	M00640_2.00	AIN	24	4.15126	5.78137	8.68923e-13	0.000405212	0.000484778
co-occurence of coordinated regulators	Coordinated Regulator	Coordinated Regulator	ttx-3	ztf-9	M02085_2.00	M00636_2.00	AIN	21	3.30048	6.36271	6.87808e-12	0.000625075	0.00107896
co-occurence of coordinated regulators	Coordinated Regulator	Coordinated Regulator	ttx-3	ztf-11	M02085_2.00	M00650_2.00	AIN	27	7.98163	3.38277	1.64193e-09	0.000319538	2.09373e-06
co-occurence of coordinated regulators	Coordinated Regulator	Coordinated Regulator	mbr-1	ztf-3	M00707_2.00	M00640_2.00	AIN	23	2.83347	8.11726	5.01773e-15	0.000815618	0.000207205
co-occurence of coordinated regulators	Coordinated Regulator	Coordinated Regulator	mbr-1	ztf-9	M00707_2.00	M00636_2.00	AIN	22	2.25276	9.76579	7.73887e-16	0.00191594	0.000449733
co-occurence of coordinated regulators	Coordinated Regulator	Coordinated Regulator	mbr-1	ztf-11	M00707_2.00	M00650_2.00	AIN	26	5.4479	4.77248	3.62894e-12	0.000952364	2.79987e-05
co-occurence of coordinated regulators	Coordinated Regulator	Coordinated Regulator	mbr-1	nhr-67	M00707_2.00	M02408_2.00	AIN	19	2.55873	7.42556	7.74294e-12	0.00417404	0.00864866
co-occurence of coordinated regulators	Coordinated Regulator	Coordinated Regulator	ztf-3	ztf-9	M00640_2.00	M00636_2.00	AIN	23	4.4381	5.1824	2.29643e-11	0.00211824	0.000111634
co-occurence of coordinated regulators	Coordinated Regulator	Coordinated Regulator	ztf-3	ztf-11	M00640_2.00	M00650_2.00	AIN	29	10.7328	2.70201	3.72048e-08	0.00169861	3.351e-06
co-occurence of coordinated regulators	Coordinated Regulator	Coordinated Regulator	ztf-3	nhr-67	M00640_2.00	M02408_2.00	AIN	21	5.04088	4.16594	8.32348e-09	0.0030616	0.021221
co-occurence of coordinated regulators	Coordinated Regulator	Coordinated Regulator	ztf-9	ztf-11	M00636_2.00	M00650_2.00	AIN	27	8.53313	3.16414	6.50946e-09	0.00149223	2.73569e-05
co-occurence of coordinated regulators	Coordinated Regulator	Coordinated Regulator	ztf-9	nhr-67	M00636_2.00	M02408_2.00	AIN	19	4.00778	4.74078	7.66131e-09	0.0051867	0.0184016
co-occurence of coordinated regulators	Coordinated Regulator	Coordinated Regulator	ztf-11	nhr-67	M00650_2.00	M02408_2.00	AIN	25	9.69209	2.57942	1.49407e-06	1.21255e-05	0.0043374
co-occurence of coordinated regulators	Coordinated Regulator	Coordinated Regulator	hlh-16	ceh-10--ttx-3	M00589_2.00	OH2007_CEH-10_TTX-3	AIY	70	21.9086	3.19509	1.42232e-21	0.000486833	2.81117e-12
co-occurence of coordinated regulators	Coordinated Regulator	Coordinated Regulator	hlh-16	ceh-38	M00589_2.00	M03716_2.00	AIY	55	20.7033	2.65658	7.15741e-13	9.54797e-05	4.68617e-05
co-occurence of coordinated regulators	Coordinated Regulator	Coordinated Regulator	hlh-16	ceh-48	M00589_2.00	M01905_2.00	AIY	55	20.5579	2.67537	5.47327e-13	0.000160208	0.00702278
co-occurence of coordinated regulators	Coordinated Regulator	Coordinated Regulator	hlh-16	ceh-74	M00589_2.00	M01248_2.00	AIY	44	9.62572	4.57109	1.49032e-17	0.00124235	0.00347093
co-occurence of coordinated regulators	Coordinated Regulator	Coordinated Regulator	hlh-16	ceh-58	M00589_2.00	M00676_2.00	AIY	58	13.916	4.16787	5.79475e-22	0.0012267	2.81165e-06
co-occurence of coordinated regulators	Coordinated Regulator	Coordinated Regulator	hlh-16	ceh-23	M00589_2.00	M00671_2.00	AIY	61	17.848	3.41774	2.01008e-19	0.00174804	8.84943e-06
co-occurence of coordinated regulators	Coordinated Regulator	Coordinated Regulator	hlh-16	lin-39	M00589_2.00	M08211_2.00	AIY	59	17.6226	3.34798	2.94001e-18	0.000264741	2.70973e-07
co-occurence of coordinated regulators	Coordinated Regulator	Coordinated Regulator	hlh-16	ttx-3	M00589_2.00	M02085_2.00	AIY	46	10.5213	4.37209	1.02832e-17	6.68512e-06	4.64065e-05
co-occurence of coordinated regulators	Coordinated Regulator	Coordinated Regulator	hlh-16	ceh-10	M00589_2.00	M00287_2.00	AIY	62	16.2086	3.82512	5.11468e-22	0.000494334	0.000167272
co-occurence of coordinated regulators	Coordinated Regulator	Coordinated Regulator	hlh-16	ztf-3	M00589_2.00	M00640_2.00	AIY	57	14.1478	4.0289	6.43666e-21	0.00162914	1.05858e-06
co-occurence of coordinated regulators	Coordinated Regulator	Coordinated Regulator	hlh-16	ztf-9	M00589_2.00	M00636_2.00	AIY	45	11.2483	4.00062	4.9252e-16	0.000902815	3.42308e-06
co-occurence of coordinated regulators	Coordinated Regulator	Coordinated Regulator	hlh-16	ztf-11	M00589_2.00	M00650_2.00	AIY	68	27.2019	2.49982	1.59041e-15	0.000536381	6.91372e-11
co-occurence of coordinated regulators	Coordinated Regulator	Coordinated Regulator	hlh-16	fax-1	M00589_2.00	M06432_2.00	AIY	68	26.4602	2.5699	4.08123e-16	0.000968456	3.53299e-11
co-occurence of coordinated regulators	Coordinated Regulator	Coordinated Regulator	ceh-10--ttx-3	ceh-38	OH2007_CEH-10_TTX-3	M03716_2.00	AIY	66	27.3232	2.41553	3.21911e-14	1.23972e-13	7.8156e-05
co-occurence of coordinated regulators	Coordinated Regulator	Coordinated Regulator	ceh-10--ttx-3	ceh-48	OH2007_CEH-10_TTX-3	M01905_2.00	AIY	66	27.1313	2.43261	2.33101e-14	1.36472e-13	0.0131968
co-occurence of coordinated regulators	Coordinated Regulator	Coordinated Regulator	ceh-10--ttx-3	ceh-74	OH2007_CEH-10_TTX-3	M01248_2.00	AIY	48	12.7035	3.77847	2.7053e-16	1.01481e-10	0.00238394
co-occurence of coordinated regulators	Coordinated Regulator	Coordinated Regulator	ceh-10--ttx-3	ceh-58	OH2007_CEH-10_TTX-3	M00676_2.00	AIY	69	18.3656	3.75702	1.16458e-24	2.42616e-11	4.57177e-07
co-occurence of coordinated regulators	Coordinated Regulator	Coordinated Regulator	ceh-10--ttx-3	ceh-23	OH2007_CEH-10_TTX-3	M00671_2.00	AIY	74	23.555	3.14159	7.7221e-23	2.68927e-13	5.88824e-06
co-occurence of coordinated regulators	Coordinated Regulator	Coordinated Regulator	ceh-10--ttx-3	lin-39	OH2007_CEH-10_TTX-3	M08211_2.00	AIY	72	23.2574	3.09579	1.11753e-21	3.48891e-15	4.57066e-07
co-occurence of coordinated regulators	Coordinated Regulator	Coordinated Regulator	ceh-10--ttx-3	ttx-3	OH2007_CEH-10_TTX-3	M02085_2.00	AIY	52	13.8855	3.74492	1.27297e-17	2.23151e-12	4.90715e-05
co-occurence of coordinated regulators	Coordinated Regulator	Coordinated Regulator	ceh-10--ttx-3	ceh-10	OH2007_CEH-10_TTX-3	M00287_2.00	AIY	73	21.3914	3.41259	2.54652e-24	3.48891e-15	0.000124282
co-occurence of coordinated regulators	Coordinated Regulator	Coordinated Regulator	ceh-10--ttx-3	ztf-3	OH2007_CEH-10_TTX-3	M00640_2.00	AIY	68	18.6715	3.6419	1.29869e-23	5.46924e-14	4.21498e-07
co-occurence of coordinated regulators	Coordinated Regulator	Coordinated Regulator	ceh-10--ttx-3	ztf-9	OH2007_CEH-10_TTX-3	M00636_2.00	AIY	50	14.8449	3.36816	3.37127e-15	1.82002e-13	6.64619e-07
co-occurence of coordinated regulators	Coordinated Regulator	Coordinated Regulator	ceh-10--ttx-3	ztf-11	OH2007_CEH-10_TTX-3	M00650_2.00	AIY	83	35.8998	2.31199	7.48145e-19	3.64827e-13	2.13774e-11
co-occurence of coordinated regulators	Coordinated Regulator	Coordinated Regulator	ceh-10--ttx-3	fax-1	OH2007_CEH-10_TTX-3	M06432_2.00	AIY	84	34.9209	2.40544	2.50809e-20	1.36472e-13	9.08305e-13
co-occurence of coordinated regulators	Coordinated Regulator	Coordinated Regulator	ceh-38	ceh-48	M03716_2.00	M01905_2.00	AIY	67	25.6387	2.61324	3.84509e-16	0.00121137	0.00842703
co-occurence of coordinated regulators	Coordinated Regulator	Coordinated Regulator	ceh-38	ceh-74	M03716_2.00	M01248_2.00	AIY	42	12.0047	3.49864	4.10478e-13	0.000287356	0.00735053
co-occurence of coordinated regulators	Coordinated Regulator	Coordinated Regulator	ceh-38	ceh-58	M03716_2.00	M00676_2.00	AIY	57	17.3552	3.28431	3.50355e-17	0.000268361	4.51409e-08
co-occurence of coordinated regulators	Coordinated Regulator	Coordinated Regulator	ceh-38	ceh-23	M03716_2.00	M00671_2.00	AIY	57	22.2591	2.56075	8.53347e-13	0.000103527	8.84744e-06
co-occurence of coordinated regulators	Coordinated Regulator	Coordinated Regulator	ceh-38	lin-39	M03716_2.00	M08211_2.00	AIY	59	21.9779	2.68452	3.40909e-14	0.000144024	1.52199e-05
co-occurence of coordinated regulators	Coordinated Regulator	Coordinated Regulator	ceh-38	ttx-3	M03716_2.00	M02085_2.00	AIY	44	13.1215	3.35326	3.53861e-13	0.00048195	1.13735e-05
co-occurence of coordinated regulators	Coordinated Regulator	Coordinated Regulator	ceh-38	ceh-10	M03716_2.00	M00287_2.00	AIY	60	20.2145	2.96817	2.30343e-16	0.000120436	6.11286e-05
co-occurence of coordinated regulators	Coordinated Regulator	Coordinated Regulator	ceh-38	ztf-3	M03716_2.00	M00640_2.00	AIY	56	17.6443	3.17383	3.06088e-16	0.000282968	2.72695e-07
co-occurence of coordinated regulators	Coordinated Regulator	Coordinated Regulator	ceh-38	ztf-9	M03716_2.00	M00636_2.00	AIY	42	14.0282	2.99397	4.23611e-11	0.00246353	1.19148e-07
co-occurence of coordinated regulators	Coordinated Regulator	Coordinated Regulator	ceh-38	ztf-11	M03716_2.00	M00650_2.00	AIY	69	33.9247	2.03392	1.51692e-11	0.000714791	5.12676e-11
co-occurence of coordinated regulators	Coordinated Regulator	Coordinated Regulator	ceh-38	fax-1	M03716_2.00	M06432_2.00	AIY	68	32.9997	2.06063	1.44094e-11	0.000802061	1.19061e-11
co-occurence of coordinated regulators	Coordinated Regulator	Coordinated Regulator	ceh-48	ceh-74	M01905_2.00	M01248_2.00	AIY	40	11.9203	3.35561	5.85089e-12	0.0449618	0.00777832
co-occurence of coordinated regulators	Coordinated Regulator	Coordinated Regulator	ceh-48	ceh-58	M01905_2.00	M00676_2.00	AIY	57	17.2334	3.30754	2.59409e-17	0.00899946	5.68536e-08
co-occurence of coordinated regulators	Coordinated Regulator	Coordinated Regulator	ceh-48	ceh-23	M01905_2.00	M00671_2.00	AIY	59	22.1027	2.66935	4.30612e-14	0.00771485	6.45797e-05
co-occurence of coordinated regulators	Coordinated Regulator	Coordinated Regulator	ceh-48	lin-39	M01905_2.00	M08211_2.00	AIY	58	21.8235	2.65768	1.02325e-13	0.0185971	1.09874e-06
co-occurence of coordinated regulators	Coordinated Regulator	Coordinated Regulator	ceh-48	ceh-10	M01905_2.00	M00287_2.00	AIY	60	20.0725	2.98916	1.71045e-16	0.0492105	0.000112848
co-occurence of coordinated regulators	Coordinated Regulator	Coordinated Regulator	ceh-48	ztf-9	M01905_2.00	M00636_2.00	AIY	43	13.9297	3.08693	9.04959e-12	0.0243011	1.67247e-06
co-occurence of coordinated regulators	Coordinated Regulator	Coordinated Regulator	ceh-48	ztf-11	M01905_2.00	M00650_2.00	AIY	69	33.6865	2.0483	1.09416e-11	0.0321453	1.07908e-10
co-occurence of coordinated regulators	Coordinated Regulator	Coordinated Regulator	ceh-74	ceh-58	M01248_2.00	M00676_2.00	AIY	41	8.06908	5.08112	9.52446e-18	0.00537032	4.89332e-06
co-occurence of coordinated regulators	Coordinated Regulator	Coordinated Regulator	ceh-74	ceh-23	M01248_2.00	M00671_2.00	AIY	42	10.349	4.05834	4.11132e-15	0.00126193	2.06656e-07
co-occurence of coordinated regulators	Coordinated Regulator	Coordinated Regulator	ceh-74	lin-39	M01248_2.00	M08211_2.00	AIY	41	10.2183	4.0124	1.36413e-14	0.000712456	4.22523e-07
co-occurence of coordinated regulators	Coordinated Regulator	Coordinated Regulator	ceh-74	ttx-3	M01248_2.00	M02085_2.00	AIY	35	6.10069	5.73706	1.35158e-16	0.00855909	9.77303e-05
co-occurence of coordinated regulators	Coordinated Regulator	Coordinated Regulator	ceh-74	ceh-10	M01248_2.00	M00287_2.00	AIY	45	9.39845	4.78802	1.17986e-18	0.006273	2.22813e-05
co-occurence of coordinated regulators	Coordinated Regulator	Coordinated Regulator	ceh-74	ztf-3	M01248_2.00	M00640_2.00	AIY	45	8.20349	5.48547	1.11403e-20	0.00233751	2.31392e-08
co-occurence of coordinated regulators	Coordinated Regulator	Coordinated Regulator	ceh-74	ztf-9	M01248_2.00	M00636_2.00	AIY	36	6.52222	5.51959	1.36272e-16	0.000498813	5.49199e-08
co-occurence of coordinated regulators	Coordinated Regulator	Coordinated Regulator	ceh-74	ztf-11	M01248_2.00	M00650_2.00	AIY	48	15.7728	3.04321	5.16852e-13	0.0033636	8.07323e-10
co-occurence of coordinated regulators	Coordinated Regulator	Coordinated Regulator	ceh-74	fax-1	M01248_2.00	M06432_2.00	AIY	48	15.3427	3.12852	2.02505e-13	0.0033636	2.94492e-10
co-occurence of coordinated regulators	Coordinated Regulator	Coordinated Regulator	ceh-58	ceh-23	M00676_2.00	M00671_2.00	AIY	67	14.9617	4.4781	1.73988e-27	2.03272e-06	1.63368e-05
co-occurence of coordinated regulators	Coordinated Regulator	Coordinated Regulator	ceh-58	lin-39	M00676_2.00	M08211_2.00	AIY	61	14.7727	4.12924	4.11317e-23	7.64104e-07	1.14412e-05
co-occurence of coordinated regulators	Coordinated Regulator	Coordinated Regulator	ceh-58	ttx-3	M00676_2.00	M02085_2.00	AIY	45	8.81982	5.10215	1.28448e-19	8.13278e-07	1.38889e-06
co-occurence of coordinated regulators	Coordinated Regulator	Coordinated Regulator	ceh-58	ceh-10	M00676_2.00	M00287_2.00	AIY	62	13.5874	4.56304	1.83026e-25	7.72542e-07	3.50595e-05
co-occurence of coordinated regulators	Coordinated Regulator	Coordinated Regulator	ceh-58	ztf-3	M00676_2.00	M00640_2.00	AIY	57	11.8599	4.80613	3.89989e-24	4.66232e-07	1.01587e-06
co-occurence of coordinated regulators	Coordinated Regulator	Coordinated Regulator	ceh-58	ztf-9	M00676_2.00	M00636_2.00	AIY	43	9.42924	4.56028	4.16812e-17	3.40534e-07	1.63281e-07
co-occurence of coordinated regulators	Coordinated Regulator	Coordinated Regulator	ceh-58	ztf-11	M00676_2.00	M00650_2.00	AIY	71	22.8029	3.11364	2.02689e-21	2.1271e-06	4.72748e-10
co-occurence of coordinated regulators	Coordinated Regulator	Coordinated Regulator	ceh-58	fax-1	M00676_2.00	M06432_2.00	AIY	69	22.1811	3.11075	1.35351e-20	9.27173e-07	3.13517e-11
co-occurence of coordinated regulators	Coordinated Regulator	Coordinated Regulator	ceh-23	lin-39	M00671_2.00	M08211_2.00	AIY	63	18.9468	3.3251	1.18193e-19	1.67186e-05	3.16951e-07
co-occurence of coordinated regulators	Coordinated Regulator	Coordinated Regulator	ceh-23	ttx-3	M00671_2.00	M02085_2.00	AIY	49	11.3119	4.33172	8.16046e-19	1.21069e-05	6.44799e-06
co-occurence of coordinated regulators	Coordinated Regulator	Coordinated Regulator	ceh-23	ceh-10	M00671_2.00	M00287_2.00	AIY	69	17.4266	3.95946	7.45435e-26	9.97575e-06	2.18077e-05
co-occurence of coordinated regulators	Coordinated Regulator	Coordinated Regulator	ceh-23	ztf-3	M00671_2.00	M00640_2.00	AIY	60	15.2109	3.94453	8.89582e-22	2.03821e-06	1.70706e-07
co-occurence of coordinated regulators	Coordinated Regulator	Coordinated Regulator	ceh-23	ztf-9	M00671_2.00	M00636_2.00	AIY	46	12.0935	3.80369	1.16451e-15	6.11749e-06	2.25611e-06
co-occurence of coordinated regulators	Coordinated Regulator	Coordinated Regulator	ceh-23	ztf-11	M00671_2.00	M00650_2.00	AIY	72	29.246	2.46187	1.77065e-16	5.83543e-06	5.23301e-11
co-occurence of coordinated regulators	Coordinated Regulator	Coordinated Regulator	ceh-23	fax-1	M00671_2.00	M06432_2.00	AIY	71	28.4486	2.49573	1.86502e-16	1.58268e-06	2.55528e-12
co-occurence of coordinated regulators	Coordinated Regulator	Coordinated Regulator	lin-39	ttx-3	M08211_2.00	M02085_2.00	AIY	45	11.169	4.02901	3.87415e-16	1.93162e-07	4.18669e-06
co-occurence of coordinated regulators	Coordinated Regulator	Coordinated Regulator	lin-39	ceh-10	M08211_2.00	M00287_2.00	AIY	62	17.2065	3.60329	7.38422e-21	2.85124e-06	0.000189864
co-occurence of coordinated regulators	Coordinated Regulator	Coordinated Regulator	lin-39	ztf-3	M08211_2.00	M00640_2.00	AIY	63	15.0188	4.19475	2.72222e-24	5.03376e-08	6.50688e-08
co-occurence of coordinated regulators	Coordinated Regulator	Coordinated Regulator	lin-39	ztf-9	M08211_2.00	M00636_2.00	AIY	48	11.9408	4.01985	3.0854e-17	1.99159e-07	1.53457e-06
co-occurence of coordinated regulators	Coordinated Regulator	Coordinated Regulator	lin-39	ztf-11	M08211_2.00	M00650_2.00	AIY	70	28.8766	2.42411	1.71005e-15	7.70987e-07	4.98853e-12
co-occurence of coordinated regulators	Coordinated Regulator	Coordinated Regulator	lin-39	fax-1	M08211_2.00	M06432_2.00	AIY	71	28.0892	2.52766	1.01783e-16	2.77157e-06	4.98853e-12
co-occurence of coordinated regulators	Coordinated Regulator	Coordinated Regulator	ttx-3	ceh-10	M02085_2.00	M00287_2.00	AIY	52	10.2729	5.06188	1.0351e-22	8.03795e-05	7.90724e-07
co-occurence of coordinated regulators	Coordinated Regulator	Coordinated Regulator	ttx-3	ztf-3	M02085_2.00	M00640_2.00	AIY	45	8.96673	5.01855	2.26383e-19	1.13914e-05	1.70429e-08
co-occurence of coordinated regulators	Coordinated Regulator	Coordinated Regulator	ttx-3	ztf-9	M02085_2.00	M00636_2.00	AIY	35	7.12904	4.9095	8.92167e-15	0.000608911	1.36357e-05
co-occurence of coordinated regulators	Coordinated Regulator	Coordinated Regulator	ttx-3	ztf-11	M02085_2.00	M00650_2.00	AIY	52	17.2403	3.01619	4.41058e-14	3.37729e-05	6.91309e-09
co-occurence of coordinated regulators	Coordinated Regulator	Coordinated Regulator	ttx-3	fax-1	M02085_2.00	M06432_2.00	AIY	52	16.7702	3.10074	1.5759e-14	1.85582e-05	2.66202e-10
co-occurence of coordinated regulators	Coordinated Regulator	Coordinated Regulator	ceh-10	ztf-3	M00287_2.00	M00640_2.00	AIY	59	13.8137	4.27111	7.69112e-23	0.000156602	3.32988e-08
co-occurence of coordinated regulators	Coordinated Regulator	Coordinated Regulator	ceh-10	ztf-9	M00287_2.00	M00636_2.00	AIY	44	10.9827	4.0063	1.12104e-15	0.000261151	2.79728e-06
co-occurence of coordinated regulators	Coordinated Regulator	Coordinated Regulator	ceh-10	ztf-11	M00287_2.00	M00650_2.00	AIY	72	26.5597	2.71088	1.21243e-18	0.000112535	1.19061e-11
co-occurence of coordinated regulators	Coordinated Regulator	Coordinated Regulator	ceh-10	fax-1	M00287_2.00	M06432_2.00	AIY	73	25.8355	2.82557	5.43098e-20	0.000173168	4.55505e-12
co-occurence of coordinated regulators	Coordinated Regulator	Coordinated Regulator	ztf-3	ztf-9	M00640_2.00	M00636_2.00	AIY	48	9.5863	5.00715	1.1163e-20	3.19832e-07	1.8535e-06
co-occurence of coordinated regulators	Coordinated Regulator	Coordinated Regulator	ztf-3	ztf-11	M00640_2.00	M00650_2.00	AIY	67	23.1827	2.89008	3.0658e-18	3.56759e-07	4.66884e-12
co-occurence of coordinated regulators	Coordinated Regulator	Coordinated Regulator	ztf-3	fax-1	M00640_2.00	M06432_2.00	AIY	69	22.5506	3.05978	3.13882e-20	6.80407e-07	3.03532e-12
co-occurence of coordinated regulators	Coordinated Regulator	Coordinated Regulator	ztf-9	ztf-11	M00636_2.00	M00650_2.00	AIY	51	18.4316	2.76699	1.98175e-12	2.05469e-06	1.8415e-11
co-occurence of coordinated regulators	Coordinated Regulator	Coordinated Regulator	ztf-9	fax-1	M00636_2.00	M06432_2.00	AIY	51	17.929	2.84456	7.41961e-13	2.06094e-06	2.15566e-10
co-occurence of coordinated regulators	Coordinated Regulator	Coordinated Regulator	ztf-11	fax-1	M00650_2.00	M06432_2.00	AIY	81	43.358	1.86817	1.03612e-12	2.66785e-12	2.81117e-12
co-occurence of coordinated regulators	Coordinated Regulator	Coordinated Regulator	atf-7	cebp-1	M00595_2.00	M00604_2.00	AIZ	31	12.0162	2.57986	4.14673e-08	0.000794177	1.34602e-06
co-occurence of coordinated regulators	Coordinated Regulator	Coordinated Regulator	atf-7	2020-06-01	M00595_2.00	M00599_2.00	AIZ	24	5.61822	4.27182	4.08406e-10	0.00156952	0.0158505
co-occurence of coordinated regulators	Coordinated Regulator	Coordinated Regulator	atf-7	cey-1	M00595_2.00	M01903_2.00	AIZ	22	3.90227	5.63774	2.23636e-11	0.00183898	0.00404292
co-occurence of coordinated regulators	Coordinated Regulator	Coordinated Regulator	atf-7	ceh-38	M00595_2.00	M03716_2.00	AIZ	23	8.9391	2.57296	6.8425e-06	0.000965323	0.00102155
co-occurence of coordinated regulators	Coordinated Regulator	Coordinated Regulator	atf-7	ceh-48	M00595_2.00	M01905_2.00	AIZ	23	8.87633	2.59116	6.09003e-06	0.00238171	0.00608081
co-occurence of coordinated regulators	Coordinated Regulator	Coordinated Regulator	atf-7	ceh-74	M00595_2.00	M01248_2.00	AIZ	19	4.15611	4.57158	1.62369e-08	0.00223787	0.000825193
co-occurence of coordinated regulators	Coordinated Regulator	Coordinated Regulator	atf-7	unc-62	M00595_2.00	M02185_2.00	AIZ	27	5.85022	4.61521	3.88068e-12	0.00135389	0.000106171
co-occurence of coordinated regulators	Coordinated Regulator	Coordinated Regulator	atf-7	unc-86	M00595_2.00	M03312_2.00	AIZ	31	12.6039	2.45955	1.22646e-07	0.000648261	1.16152e-06
co-occurence of coordinated regulators	Coordinated Regulator	Coordinated Regulator	atf-7	unc-86	M00595_2.00	M02244_2.00	AIZ	23	5.26793	4.36604	7.30015e-10	0.00212038	0.000235834
co-occurence of coordinated regulators	Coordinated Regulator	Coordinated Regulator	atf-7	ceh-43	M00595_2.00	M00423_2.00	AIZ	28	6.6436	4.21458	9.41486e-12	0.00200598	6.16789e-05
co-occurence of coordinated regulators	Coordinated Regulator	Coordinated Regulator	atf-7	ceh-16	M00595_2.00	M06491_2.00	AIZ	30	9.65787	3.10627	1.31336e-09	0.00113715	3.28531e-06
co-occurence of coordinated regulators	Coordinated Regulator	Coordinated Regulator	atf-7	ztf-3	M00595_2.00	M00640_2.00	AIZ	25	6.10862	4.09258	3.50318e-10	0.00173117	0.000127207
co-occurence of coordinated regulators	Coordinated Regulator	Coordinated Regulator	atf-7	ztf-9	M00595_2.00	M00636_2.00	AIZ	19	4.85669	3.91213	1.63827e-07	0.00495331	0.000132487
co-occurence of coordinated regulators	Coordinated Regulator	Coordinated Regulator	atf-7	die-1	M00595_2.00	M00610_2.00	AIZ	32	15.7055	2.0375	4.63439e-06	0.000516178	9.24348e-08
co-occurence of coordinated regulators	Coordinated Regulator	Coordinated Regulator	atf-7	ztf-11	M00595_2.00	M00650_2.00	AIZ	29	11.745	2.46913	4.11101e-07	0.00162241	1.16787e-06
co-occurence of coordinated regulators	Coordinated Regulator	Coordinated Regulator	atf-7	dmd-6	M00595_2.00	M00655_2.00	AIZ	32	13.0788	2.4467	7.05553e-08	0.000516178	1.50311e-07
co-occurence of coordinated regulators	Coordinated Regulator	Coordinated Regulator	cebp-1	2020-06-01	M00604_2.00	M00599_2.00	AIZ	29	10.9069	2.65886	8.55803e-08	4.25277e-06	0.0314625
co-occurence of coordinated regulators	Coordinated Regulator	Coordinated Regulator	cebp-1	cey-1	M00604_2.00	M01903_2.00	AIZ	25	7.57567	3.30004	2.16398e-08	1.77506e-05	0.000175808
co-occurence of coordinated regulators	Coordinated Regulator	Coordinated Regulator	cebp-1	ceh-38	M00604_2.00	M03716_2.00	AIZ	37	17.3539	2.13208	7.59032e-08	4.84211e-06	0.00242955
co-occurence of coordinated regulators	Coordinated Regulator	Coordinated Regulator	cebp-1	ceh-48	M00604_2.00	M01905_2.00	AIZ	34	17.232	1.97307	3.3744e-06	8.24041e-05	0.0119943
co-occurence of coordinated regulators	Coordinated Regulator	Coordinated Regulator	cebp-1	ceh-74	M00604_2.00	M01248_2.00	AIZ	25	8.06847	3.09848	7.05344e-08	2.57434e-06	0.000329475
co-occurence of coordinated regulators	Coordinated Regulator	Coordinated Regulator	cebp-1	ceh-58	M00604_2.00	M00676_2.00	AIZ	31	11.6647	2.6576	2.10587e-08	1.18039e-05	0.00221429
co-occurence of coordinated regulators	Coordinated Regulator	Coordinated Regulator	cebp-1	unc-62	M00604_2.00	M02185_2.00	AIZ	35	11.3573	3.08171	1.81899e-11	8.70539e-07	6.62527e-05
co-occurence of coordinated regulators	Coordinated Regulator	Coordinated Regulator	cebp-1	unc-86	M00604_2.00	M03312_2.00	AIZ	44	24.4686	1.79822	8.40449e-08	3.566e-06	6.73196e-08
co-occurence of coordinated regulators	Coordinated Regulator	Coordinated Regulator	cebp-1	unc-86	M00604_2.00	M02244_2.00	AIZ	31	10.2269	3.03122	1.00096e-09	4.84211e-06	0.000374902
co-occurence of coordinated regulators	Coordinated Regulator	Coordinated Regulator	cebp-1	ceh-43	M00604_2.00	M00423_2.00	AIZ	35	12.8975	2.7137	5.45184e-10	8.68457e-07	1.96345e-05
co-occurence of coordinated regulators	Coordinated Regulator	Coordinated Regulator	cebp-1	ceh-16	M00604_2.00	M06491_2.00	AIZ	40	18.7493	2.13341	8.36462e-09	2.24454e-07	1.43027e-06
co-occurence of coordinated regulators	Coordinated Regulator	Coordinated Regulator	cebp-1	ztf-3	M00604_2.00	M00640_2.00	AIZ	32	11.859	2.69838	6.99217e-09	2.08594e-06	5.36386e-05
co-occurence of coordinated regulators	Coordinated Regulator	Coordinated Regulator	cebp-1	ztf-9	M00604_2.00	M00636_2.00	AIZ	25	9.42852	2.65153	1.23917e-06	9.3344e-05	0.000309177
co-occurence of coordinated regulators	Coordinated Regulator	Coordinated Regulator	cebp-1	die-1	M00604_2.00	M00610_2.00	AIZ	46	30.4899	1.5087	7.77439e-06	9.17639e-07	1.59399e-09
co-occurence of coordinated regulators	Coordinated Regulator	Coordinated Regulator	cebp-1	ztf-11	M00604_2.00	M00650_2.00	AIZ	44	22.8012	1.92972	7.86736e-09	1.20516e-06	1.65042e-06
co-occurence of coordinated regulators	Coordinated Regulator	Coordinated Regulator	cebp-1	dmd-6	M00604_2.00	M00655_2.00	AIZ	43	25.3906	1.69354	1.21066e-06	5.0785e-07	1.29953e-07
co-occurence of coordinated regulators	Coordinated Regulator	Coordinated Regulator	2020-06-01	unc-86	M00599_2.00	M02244_2.00	AIZ	24	4.78164	5.0192	1.94306e-11	0.0221072	0.000351374
co-occurence of coordinated regulators	Coordinated Regulator	Coordinated Regulator	2020-06-01	ceh-43	M00599_2.00	M00423_2.00	AIZ	26	6.03031	4.31155	4.58834e-11	0.0406198	0.000145881
co-occurence of coordinated regulators	Coordinated Regulator	Coordinated Regulator	2020-06-01	ceh-16	M00599_2.00	M06491_2.00	AIZ	29	8.76633	3.30811	7.53136e-10	0.0364489	6.53644e-07
co-occurence of coordinated regulators	Coordinated Regulator	Coordinated Regulator	2020-06-01	die-1	M00599_2.00	M00610_2.00	AIZ	31	14.2557	2.17457	1.89851e-06	0.0456715	3.23026e-06
co-occurence of coordinated regulators	Coordinated Regulator	Coordinated Regulator	2020-06-01	ztf-11	M00599_2.00	M00650_2.00	AIZ	29	10.6608	2.72024	5.26969e-08	0.0384826	1.39745e-07
co-occurence of coordinated regulators	Coordinated Regulator	Coordinated Regulator	2020-06-01	dmd-6	M00599_2.00	M00655_2.00	AIZ	30	11.8715	2.52706	1.3075e-07	0.0405086	2.70973e-07
co-occurence of coordinated regulators	Coordinated Regulator	Coordinated Regulator	cey-1	ceh-38	M01903_2.00	M03716_2.00	AIZ	20	5.63572	3.54879	3.1394e-07	5.48005e-05	0.00224869
co-occurence of coordinated regulators	Coordinated Regulator	Coordinated Regulator	cey-1	ceh-48	M01903_2.00	M01905_2.00	AIZ	20	5.59614	3.57389	2.82474e-07	8.74737e-05	0.0135067
co-occurence of coordinated regulators	Coordinated Regulator	Coordinated Regulator	cey-1	ceh-74	M01903_2.00	M01248_2.00	AIZ	19	2.62025	7.25121	1.4122e-11	0.000311361	0.000232939
co-occurence of coordinated regulators	Coordinated Regulator	Coordinated Regulator	cey-1	ceh-58	M01903_2.00	M00676_2.00	AIZ	20	3.78812	5.27966	6.3587e-10	0.00306037	0.00548807
co-occurence of coordinated regulators	Coordinated Regulator	Coordinated Regulator	cey-1	unc-62	M01903_2.00	M02185_2.00	AIZ	24	3.68831	6.50704	1.31091e-13	0.000127707	0.000999296
co-occurence of coordinated regulators	Coordinated Regulator	Coordinated Regulator	cey-1	unc-86	M01903_2.00	M03312_2.00	AIZ	26	7.94622	3.27199	1.14646e-08	0.00105788	1.02611e-06
co-occurence of coordinated regulators	Coordinated Regulator	Coordinated Regulator	cey-1	unc-86	M01903_2.00	M02244_2.00	AIZ	19	3.3212	5.72082	5.47158e-10	2.21312e-05	0.000402191
co-occurence of coordinated regulators	Coordinated Regulator	Coordinated Regulator	cey-1	ceh-43	M01903_2.00	M00423_2.00	AIZ	23	4.1885	5.49122	1.11974e-11	0.000579971	1.25226e-05
co-occurence of coordinated regulators	Coordinated Regulator	Coordinated Regulator	cey-1	ceh-16	M01903_2.00	M06491_2.00	AIZ	24	6.08887	3.94162	1.82983e-09	0.00170574	1.5778e-05
co-occurence of coordinated regulators	Coordinated Regulator	Coordinated Regulator	cey-1	ztf-3	M01903_2.00	M00640_2.00	AIZ	22	3.85122	5.71248	1.76717e-11	9.04378e-05	6.9166e-06
co-occurence of coordinated regulators	Coordinated Regulator	Coordinated Regulator	cey-1	ztf-9	M01903_2.00	M00636_2.00	AIZ	18	3.06193	5.87864	1.13799e-09	2.29961e-05	0.000125759
co-occurence of coordinated regulators	Coordinated Regulator	Coordinated Regulator	cey-1	die-1	M01903_2.00	M00610_2.00	AIZ	26	9.90166	2.62582	7.94507e-07	0.00105788	1.04935e-06
co-occurence of coordinated regulators	Coordinated Regulator	Coordinated Regulator	cey-1	ztf-11	M01903_2.00	M00650_2.00	AIZ	25	7.40474	3.37622	1.40117e-08	0.00029467	2.15881e-06
co-occurence of coordinated regulators	Coordinated Regulator	Coordinated Regulator	cey-1	dmd-6	M01903_2.00	M00655_2.00	AIZ	25	8.24565	3.0319	1.05636e-07	0.00145458	1.919e-06
co-occurence of coordinated regulators	Coordinated Regulator	Coordinated Regulator	ceh-38	ceh-48	M03716_2.00	M01905_2.00	AIZ	33	12.8193	2.57424	1.02278e-08	0.00460706	0.00422955
co-occurence of coordinated regulators	Coordinated Regulator	Coordinated Regulator	ceh-38	ceh-74	M03716_2.00	M01248_2.00	AIZ	24	6.00233	3.99845	1.40338e-09	0.00335369	0.000718573
co-occurence of coordinated regulators	Coordinated Regulator	Coordinated Regulator	ceh-38	ceh-58	M03716_2.00	M00676_2.00	AIZ	25	8.67762	2.88097	2.73471e-07	0.000665218	0.000413661
co-occurence of coordinated regulators	Coordinated Regulator	Coordinated Regulator	ceh-38	unc-62	M03716_2.00	M02185_2.00	AIZ	27	8.44898	3.19565	8.26844e-09	0.000852719	0.000445162
co-occurence of coordinated regulators	Coordinated Regulator	Coordinated Regulator	ceh-38	unc-86	M03716_2.00	M03312_2.00	AIZ	36	18.2028	1.97772	1.0412e-06	0.000612845	7.08468e-07
co-occurence of coordinated regulators	Coordinated Regulator	Coordinated Regulator	ceh-38	unc-86	M03716_2.00	M02244_2.00	AIZ	26	7.60803	3.41744	4.8757e-09	0.00188296	0.000709412
co-occurence of coordinated regulators	Coordinated Regulator	Coordinated Regulator	ceh-38	ceh-43	M03716_2.00	M00423_2.00	AIZ	29	9.59479	3.02247	5.43137e-09	0.00135943	0.000211517
co-occurence of coordinated regulators	Coordinated Regulator	Coordinated Regulator	ceh-38	ceh-16	M03716_2.00	M06491_2.00	AIZ	33	13.9481	2.36592	7.94286e-08	0.000591676	4.24172e-06
co-occurence of coordinated regulators	Coordinated Regulator	Coordinated Regulator	ceh-38	ztf-3	M03716_2.00	M00640_2.00	AIZ	28	8.82216	3.17383	4.24967e-09	0.00303954	6.98928e-05
co-occurence of coordinated regulators	Coordinated Regulator	Coordinated Regulator	ceh-38	ztf-9	M03716_2.00	M00636_2.00	AIZ	20	7.0141	2.8514	8.18112e-06	0.00730327	0.00136318
co-occurence of coordinated regulators	Coordinated Regulator	Coordinated Regulator	ceh-38	die-1	M03716_2.00	M00610_2.00	AIZ	38	22.6822	1.67532	2.64717e-05	0.00272926	1.71922e-07
co-occurence of coordinated regulators	Coordinated Regulator	Coordinated Regulator	ceh-38	ztf-11	M03716_2.00	M00650_2.00	AIZ	36	16.9624	2.12235	1.67668e-07	0.00403842	2.40826e-05
co-occurence of coordinated regulators	Coordinated Regulator	Coordinated Regulator	ceh-38	dmd-6	M03716_2.00	M00655_2.00	AIZ	36	18.8887	1.9059	2.67394e-06	0.000802674	1.10649e-05
co-occurence of coordinated regulators	Coordinated Regulator	Coordinated Regulator	ceh-48	ceh-74	M01905_2.00	M01248_2.00	AIZ	22	5.96017	3.69117	3.34068e-08	0.00297442	0.000651131
co-occurence of coordinated regulators	Coordinated Regulator	Coordinated Regulator	ceh-48	ceh-58	M01905_2.00	M00676_2.00	AIZ	25	8.61668	2.90135	2.39938e-07	0.00454207	0.00114818
co-occurence of coordinated regulators	Coordinated Regulator	Coordinated Regulator	ceh-48	unc-62	M01905_2.00	M02185_2.00	AIZ	27	8.38965	3.21825	7.1682e-09	0.00511438	6.35131e-05
co-occurence of coordinated regulators	Coordinated Regulator	Coordinated Regulator	ceh-48	unc-86	M01905_2.00	M03312_2.00	AIZ	33	18.0749	1.82573	3.28863e-05	0.00453307	3.20879e-06
co-occurence of coordinated regulators	Coordinated Regulator	Coordinated Regulator	ceh-48	unc-86	M01905_2.00	M02244_2.00	AIZ	26	7.5546	3.44161	4.24447e-09	0.00978799	0.000690704
co-occurence of coordinated regulators	Coordinated Regulator	Coordinated Regulator	ceh-48	ceh-43	M01905_2.00	M00423_2.00	AIZ	26	9.5274	2.72897	3.84233e-07	0.00533704	0.000153559
co-occurence of coordinated regulators	Coordinated Regulator	Coordinated Regulator	ceh-48	ceh-16	M01905_2.00	M06491_2.00	AIZ	30	13.8501	2.16605	3.5694e-06	0.00950385	7.73606e-08
co-occurence of coordinated regulators	Coordinated Regulator	Coordinated Regulator	ceh-48	ztf-3	M01905_2.00	M00640_2.00	AIZ	27	8.7602	3.08212	1.7238e-08	0.0156621	3.90013e-05
co-occurence of coordinated regulators	Coordinated Regulator	Coordinated Regulator	ceh-48	ztf-9	M01905_2.00	M00636_2.00	AIZ	19	6.96484	2.72799	2.75162e-05	0.0236416	0.00273507
co-occurence of coordinated regulators	Coordinated Regulator	Coordinated Regulator	ceh-48	die-1	M01905_2.00	M00610_2.00	AIZ	35	22.5229	1.55398	0.000535542	0.012597	2.47026e-07
co-occurence of coordinated regulators	Coordinated Regulator	Coordinated Regulator	ceh-48	ztf-11	M01905_2.00	M00650_2.00	AIZ	34	16.8432	2.01862	1.96077e-06	0.0193552	9.01696e-06
co-occurence of coordinated regulators	Coordinated Regulator	Coordinated Regulator	ceh-48	dmd-6	M01905_2.00	M00655_2.00	AIZ	33	18.756	1.75944	7.44203e-05	0.00614307	2.18996e-05
co-occurence of coordinated regulators	Coordinated Regulator	Coordinated Regulator	ceh-74	ceh-58	M01248_2.00	M00676_2.00	AIZ	20	4.03454	4.95719	1.73082e-09	0.00379516	0.00304859
co-occurence of coordinated regulators	Coordinated Regulator	Coordinated Regulator	ceh-74	unc-62	M01248_2.00	M02185_2.00	AIZ	23	3.92824	5.85504	3.44756e-12	9.02418e-05	0.000511051
co-occurence of coordinated regulators	Coordinated Regulator	Coordinated Regulator	ceh-74	unc-86	M01248_2.00	M03312_2.00	AIZ	25	8.46313	2.95399	1.71922e-07	0.000520732	6.34652e-07
co-occurence of coordinated regulators	Coordinated Regulator	Coordinated Regulator	ceh-74	unc-86	M01248_2.00	M02244_2.00	AIZ	20	3.53725	5.65411	2.11302e-10	4.91839e-05	0.00032276
co-occurence of coordinated regulators	Coordinated Regulator	Coordinated Regulator	ceh-74	ceh-43	M01248_2.00	M00423_2.00	AIZ	22	4.46097	4.93167	2.32323e-10	0.00035115	1.90677e-05
co-occurence of coordinated regulators	Coordinated Regulator	Coordinated Regulator	ceh-74	ceh-16	M01248_2.00	M06491_2.00	AIZ	24	6.48496	3.70087	5.83719e-09	0.000910968	1.8535e-06
co-occurence of coordinated regulators	Coordinated Regulator	Coordinated Regulator	ceh-74	ztf-3	M01248_2.00	M00640_2.00	AIZ	24	4.10174	5.85117	1.02813e-12	0.000331556	4.63502e-06
co-occurence of coordinated regulators	Coordinated Regulator	Coordinated Regulator	ceh-74	ztf-9	M01248_2.00	M00636_2.00	AIZ	18	3.26111	5.51959	2.8276e-09	9.35512e-05	0.000165374
co-occurence of coordinated regulators	Coordinated Regulator	Coordinated Regulator	ceh-74	die-1	M01248_2.00	M00610_2.00	AIZ	25	10.5458	2.37062	9.13782e-06	0.000520732	2.39189e-06
co-occurence of coordinated regulators	Coordinated Regulator	Coordinated Regulator	ceh-74	ztf-11	M01248_2.00	M00650_2.00	AIZ	25	7.88642	3.17001	4.59979e-08	0.000520732	1.56963e-05
co-occurence of coordinated regulators	Coordinated Regulator	Coordinated Regulator	ceh-74	dmd-6	M01248_2.00	M00655_2.00	AIZ	25	8.78203	2.84672	3.40209e-07	0.000520732	2.70463e-07
co-occurence of coordinated regulators	Coordinated Regulator	Coordinated Regulator	ceh-58	unc-62	M00676_2.00	M02185_2.00	AIZ	26	5.67909	4.5782	1.35641e-11	0.00695711	0.000340094
co-occurence of coordinated regulators	Coordinated Regulator	Coordinated Regulator	ceh-58	unc-86	M00676_2.00	M03312_2.00	AIZ	31	12.2352	2.53367	6.25155e-08	0.00360298	2.15116e-06
co-occurence of coordinated regulators	Coordinated Regulator	Coordinated Regulator	ceh-58	unc-86	M00676_2.00	M02244_2.00	AIZ	23	5.11383	4.4976	4.2622e-10	0.00148528	0.000671528
co-occurence of coordinated regulators	Coordinated Regulator	Coordinated Regulator	ceh-58	ceh-43	M00676_2.00	M00423_2.00	AIZ	32	6.44926	4.96181	1.82464e-15	0.0143615	0.000650552
co-occurence of coordinated regulators	Coordinated Regulator	Coordinated Regulator	ceh-58	ceh-16	M00676_2.00	M06491_2.00	AIZ	30	9.37536	3.19988	6.69096e-10	0.0028636	3.21609e-06
co-occurence of coordinated regulators	Coordinated Regulator	Coordinated Regulator	ceh-58	ztf-3	M00676_2.00	M00640_2.00	AIZ	23	5.92993	3.87863	6.00405e-09	0.00937463	4.69719e-05
co-occurence of coordinated regulators	Coordinated Regulator	Coordinated Regulator	ceh-58	ztf-9	M00676_2.00	M00636_2.00	AIZ	19	4.71462	4.03002	1.05483e-07	0.000132389	1.68867e-05
co-occurence of coordinated regulators	Coordinated Regulator	Coordinated Regulator	ceh-58	die-1	M00676_2.00	M00610_2.00	AIZ	34	15.2461	2.23008	1.74164e-07	0.01341	3.42187e-06
co-occurence of coordinated regulators	Coordinated Regulator	Coordinated Regulator	ceh-58	ztf-11	M00676_2.00	M00650_2.00	AIZ	32	11.4015	2.80666	2.73085e-09	0.00609728	2.12863e-05
co-occurence of coordinated regulators	Coordinated Regulator	Coordinated Regulator	ceh-58	dmd-6	M00676_2.00	M00655_2.00	AIZ	34	12.6963	2.67795	1.76076e-09	0.01341	4.20112e-05
co-occurence of coordinated regulators	Coordinated Regulator	Coordinated Regulator	unc-62	unc-86	M02185_2.00	M03312_2.00	AIZ	35	11.9129	2.938	6.52876e-11	0.000118391	1.03483e-07
co-occurence of coordinated regulators	Coordinated Regulator	Coordinated Regulator	unc-62	unc-86	M02185_2.00	M02244_2.00	AIZ	27	4.9791	5.42267	1.21563e-13	0.000124448	0.000505002
co-occurence of coordinated regulators	Coordinated Regulator	Coordinated Regulator	unc-62	ceh-43	M02185_2.00	M00423_2.00	AIZ	29	6.27934	4.61832	4.0761e-13	0.000218499	2.38038e-06
co-occurence of coordinated regulators	Coordinated Regulator	Coordinated Regulator	unc-62	ceh-16	M02185_2.00	M06491_2.00	AIZ	31	9.12834	3.39602	6.73367e-11	0.000268431	1.65336e-07
co-occurence of coordinated regulators	Coordinated Regulator	Coordinated Regulator	unc-62	ztf-3	M02185_2.00	M00640_2.00	AIZ	28	5.77369	4.84959	4.26105e-13	0.000108822	1.98786e-05
co-occurence of coordinated regulators	Coordinated Regulator	Coordinated Regulator	unc-62	ztf-9	M02185_2.00	M00636_2.00	AIZ	24	4.5904	5.2283	8.91279e-12	0.000187436	0.000415474
co-occurence of coordinated regulators	Coordinated Regulator	Coordinated Regulator	unc-62	die-1	M02185_2.00	M00610_2.00	AIZ	35	14.8444	2.35779	2.15703e-08	0.000118391	1.06819e-07
co-occurence of coordinated regulators	Coordinated Regulator	Coordinated Regulator	unc-62	ztf-11	M02185_2.00	M00650_2.00	AIZ	34	11.1011	3.06277	5.45384e-11	0.000110456	3.1381e-06
co-occurence of coordinated regulators	Coordinated Regulator	Coordinated Regulator	unc-62	dmd-6	M02185_2.00	M00655_2.00	AIZ	34	12.3617	2.75042	8.92761e-10	9.54797e-05	1.22587e-07
co-occurence of coordinated regulators	Coordinated Regulator	Coordinated Regulator	unc-86	unc-86	M03312_2.00	M02244_2.00	AIZ	32	10.7271	2.98309	6.28514e-10	7.80308e-07	0.000532055
co-occurence of coordinated regulators	Coordinated Regulator	Coordinated Regulator	unc-86	ceh-43	M03312_2.00	M00423_2.00	AIZ	35	13.5284	2.58715	1.92198e-09	5.56646e-07	1.94774e-05
co-occurence of coordinated regulators	Coordinated Regulator	Coordinated Regulator	unc-86	ceh-16	M03312_2.00	M06491_2.00	AIZ	40	19.6664	2.03393	3.48859e-08	4.85502e-07	2.43267e-05
co-occurence of coordinated regulators	Coordinated Regulator	Coordinated Regulator	unc-86	ztf-3	M03312_2.00	M00640_2.00	AIZ	33	12.439	2.65294	4.88752e-09	1.16255e-06	2.38603e-05
co-occurence of coordinated regulators	Coordinated Regulator	Coordinated Regulator	unc-86	ztf-9	M03312_2.00	M00636_2.00	AIZ	25	9.88971	2.52788	2.9246e-06	8.19707e-07	0.000309177
co-occurence of coordinated regulators	Coordinated Regulator	Coordinated Regulator	unc-86	die-1	M03312_2.00	M00610_2.00	AIZ	47	31.9813	1.46961	1.00132e-05	1.69865e-06	8.36933e-08
co-occurence of coordinated regulators	Coordinated Regulator	Coordinated Regulator	unc-86	ztf-11	M03312_2.00	M00650_2.00	AIZ	42	23.9165	1.75611	7.47655e-07	2.16441e-07	1.51671e-06
co-occurence of coordinated regulators	Coordinated Regulator	Coordinated Regulator	unc-86	dmd-6	M03312_2.00	M00655_2.00	AIZ	44	26.6325	1.65211	1.38605e-06	9.66172e-07	2.48654e-06
co-occurence of coordinated regulators	Coordinated Regulator	Coordinated Regulator	unc-86	ceh-43	M02244_2.00	M00423_2.00	AIZ	26	5.65433	4.59824	1.23927e-11	0.000879203	3.09039e-05
co-occurence of coordinated regulators	Coordinated Regulator	Coordinated Regulator	unc-86	ceh-16	M02244_2.00	M06491_2.00	AIZ	28	8.21977	3.40642	9.53289e-10	0.00236702	1.93365e-07
co-occurence of coordinated regulators	Coordinated Regulator	Coordinated Regulator	unc-86	ztf-3	M02244_2.00	M00640_2.00	AIZ	27	5.19901	5.19329	3.1133e-13	0.00349645	1.03553e-05
co-occurence of coordinated regulators	Coordinated Regulator	Coordinated Regulator	unc-86	ztf-9	M02244_2.00	M00636_2.00	AIZ	21	4.1335	5.08044	4.0664e-10	0.00599523	0.000185411
co-occurence of coordinated regulators	Coordinated Regulator	Coordinated Regulator	unc-86	die-1	M02244_2.00	M00610_2.00	AIZ	32	13.3669	2.39397	1.17342e-07	0.000814865	9.05588e-08
co-occurence of coordinated regulators	Coordinated Regulator	Coordinated Regulator	unc-86	ztf-11	M02244_2.00	M00650_2.00	AIZ	31	9.99614	3.1012	5.82955e-10	0.000588663	1.98585e-07
co-occurence of coordinated regulators	Coordinated Regulator	Coordinated Regulator	unc-86	dmd-6	M02244_2.00	M00655_2.00	AIZ	31	11.1313	2.78493	7.16563e-09	0.0010363	5.89033e-07
co-occurence of coordinated regulators	Coordinated Regulator	Coordinated Regulator	ceh-43	ceh-16	M00423_2.00	M06491_2.00	AIZ	32	10.3663	3.08693	2.72883e-10	6.32815e-05	2.87522e-06
co-occurence of coordinated regulators	Coordinated Regulator	Coordinated Regulator	ceh-43	ztf-3	M00423_2.00	M00640_2.00	AIZ	27	6.55668	4.11794	4.31821e-11	5.72079e-05	0.000100377
co-occurence of coordinated regulators	Coordinated Regulator	Coordinated Regulator	ceh-43	ztf-9	M00423_2.00	M00636_2.00	AIZ	22	5.21292	4.22028	3.44429e-09	4.85963e-05	0.000109771
co-occurence of coordinated regulators	Coordinated Regulator	Coordinated Regulator	ceh-43	die-1	M00423_2.00	M00610_2.00	AIZ	38	16.8575	2.25419	7.86736e-09	0.000576782	5.17604e-07
co-occurence of coordinated regulators	Coordinated Regulator	Coordinated Regulator	ceh-43	ztf-11	M00423_2.00	M00650_2.00	AIZ	36	12.6065	2.85566	5.63512e-11	0.000235884	1.94523e-06
co-occurence of coordinated regulators	Coordinated Regulator	Coordinated Regulator	ceh-43	dmd-6	M00423_2.00	M00655_2.00	AIZ	38	14.0382	2.7069	4.03882e-11	0.000576782	6.84725e-06
co-occurence of coordinated regulators	Coordinated Regulator	Coordinated Regulator	ceh-16	ztf-3	M06491_2.00	M00640_2.00	AIZ	30	9.53152	3.14745	9.76315e-10	5.64532e-08	2.70226e-05
co-occurence of coordinated regulators	Coordinated Regulator	Coordinated Regulator	ceh-16	ztf-9	M06491_2.00	M00636_2.00	AIZ	23	7.57809	3.03507	4.311e-07	5.93801e-07	0.000176047
co-occurence of coordinated regulators	Coordinated Regulator	Coordinated Regulator	ceh-16	die-1	M06491_2.00	M00610_2.00	AIZ	42	24.506	1.71387	1.58069e-06	2.50049e-05	6.20321e-08
co-occurence of coordinated regulators	Coordinated Regulator	Coordinated Regulator	ceh-16	ztf-11	M06491_2.00	M00650_2.00	AIZ	38	18.3262	2.07353	8.23671e-08	2.73522e-06	7.27201e-07
co-occurence of coordinated regulators	Coordinated Regulator	Coordinated Regulator	ceh-16	dmd-6	M06491_2.00	M00655_2.00	AIZ	40	20.4075	1.96007	1.04273e-07	1.08087e-05	1.70264e-07
co-occurence of coordinated regulators	Coordinated Regulator	Coordinated Regulator	ztf-3	ztf-9	M00640_2.00	M00636_2.00	AIZ	21	4.79315	4.38125	4.70657e-09	8.04581e-06	0.000729263
co-occurence of coordinated regulators	Coordinated Regulator	Coordinated Regulator	ztf-3	die-1	M00640_2.00	M00610_2.00	AIZ	33	15.5001	2.12902	9.79846e-07	4.56751e-05	3.94917e-07
co-occurence of coordinated regulators	Coordinated Regulator	Coordinated Regulator	ztf-3	ztf-11	M00640_2.00	M00650_2.00	AIZ	31	11.5914	2.6744	1.8204e-08	4.4442e-05	9.88067e-07
co-occurence of coordinated regulators	Coordinated Regulator	Coordinated Regulator	ztf-3	dmd-6	M00640_2.00	M00655_2.00	AIZ	32	12.9077	2.47913	5.1789e-08	2.40581e-05	2.35253e-06
co-occurence of coordinated regulators	Coordinated Regulator	Coordinated Regulator	ztf-9	die-1	M00636_2.00	M00610_2.00	AIZ	25	12.3234	2.02866	0.00013115	0.000491279	4.15559e-06
co-occurence of coordinated regulators	Coordinated Regulator	Coordinated Regulator	ztf-9	ztf-11	M00636_2.00	M00650_2.00	AIZ	25	9.21578	2.71274	8.19314e-07	0.000491279	5.34953e-06
co-occurence of coordinated regulators	Coordinated Regulator	Coordinated Regulator	ztf-9	dmd-6	M00636_2.00	M00655_2.00	AIZ	24	10.2624	2.33864	1.9422e-05	0.000644714	9.39912e-07
co-occurence of coordinated regulators	Coordinated Regulator	Coordinated Regulator	die-1	ztf-11	M00610_2.00	M00650_2.00	AIZ	46	29.8019	1.54352	3.52307e-06	5.03376e-08	2.96629e-06
co-occurence of coordinated regulators	Coordinated Regulator	Coordinated Regulator	die-1	dmd-6	M00610_2.00	M00655_2.00	AIZ	48	33.1864	1.44638	8.80456e-06	1.21177e-06	1.17302e-05
co-occurence of coordinated regulators	Coordinated Regulator	Coordinated Regulator	ztf-11	dmd-6	M00650_2.00	M00655_2.00	AIZ	43	24.8177	1.73263	5.85915e-07	6.8675e-06	5.79739e-07
co-occurence of coordinated regulators	Coordinated Regulator	Coordinated Regulator	ceh-58	unc-62	M00676_2.00	M02185_2.00	ALA	26	5.78426	4.49496	2.18335e-11	0.00160015	0.00246969
co-occurence of coordinated regulators	Coordinated Regulator	Coordinated Regulator	ceh-58	ceh-18	M00676_2.00	M00681_2.00	ALA	28	8.34985	3.35335	1.47869e-09	0.00424588	0.000416497
co-occurence of coordinated regulators	Coordinated Regulator	Coordinated Regulator	ceh-58	ceh-14	M00676_2.00	M00435_2.00	ALA	32	10.3838	3.08173	3.32222e-10	0.00518175	0.000171521
co-occurence of coordinated regulators	Coordinated Regulator	Coordinated Regulator	ceh-58	ztf-3	M00676_2.00	M00640_2.00	ALA	24	6.03974	3.97368	1.70238e-09	0.00118663	0.00194653
co-occurence of coordinated regulators	Coordinated Regulator	Coordinated Regulator	ceh-58	ztf-9	M00676_2.00	M00636_2.00	ALA	19	4.80193	3.95675	1.44594e-07	0.00219144	0.000481528
co-occurence of coordinated regulators	Coordinated Regulator	Coordinated Regulator	ceh-58	ztf-11	M00676_2.00	M00650_2.00	ALA	31	11.6126	2.66951	2.16305e-08	0.00981698	0.00277903
co-occurence of coordinated regulators	Coordinated Regulator	Coordinated Regulator	ceh-58	nhr-6	M00676_2.00	M01298_2.00	ALA	29	7.76692	3.73378	5.70649e-11	0.0134694	0.0123852
co-occurence of coordinated regulators	Coordinated Regulator	Coordinated Regulator	unc-62	ceh-18	M02185_2.00	M00681_2.00	ALA	29	8.12985	3.5671	1.58741e-10	0.00152213	7.31662e-06
co-occurence of coordinated regulators	Coordinated Regulator	Coordinated Regulator	unc-62	ceh-14	M02185_2.00	M00435_2.00	ALA	33	10.1102	3.26403	3.26244e-11	0.00189961	0.000123509
co-occurence of coordinated regulators	Coordinated Regulator	Coordinated Regulator	unc-62	ztf-3	M02185_2.00	M00640_2.00	ALA	25	5.88061	4.25126	1.81656e-10	5.59736e-05	0.00218994
co-occurence of coordinated regulators	Coordinated Regulator	Coordinated Regulator	unc-62	ztf-9	M02185_2.00	M00636_2.00	ALA	23	4.67541	4.91936	8.99565e-11	0.00949557	0.0205223
co-occurence of coordinated regulators	Coordinated Regulator	Coordinated Regulator	unc-62	ztf-11	M02185_2.00	M00650_2.00	ALA	30	11.3066	2.65331	5.01718e-08	0.00848611	0.000163341
co-occurence of coordinated regulators	Coordinated Regulator	Coordinated Regulator	unc-62	nhr-6	M02185_2.00	M01298_2.00	ALA	31	7.56228	4.09929	8.54106e-13	0.0014852	0.00320634
co-occurence of coordinated regulators	Coordinated Regulator	Coordinated Regulator	ceh-18	ceh-14	M00681_2.00	M00435_2.00	ALA	34	14.5945	2.32964	6.89079e-08	0.000107294	9.79494e-05
co-occurence of coordinated regulators	Coordinated Regulator	Coordinated Regulator	ceh-18	ztf-3	M00681_2.00	M00640_2.00	ALA	27	8.48893	3.18061	1.00112e-08	0.000181888	0.000210282
co-occurence of coordinated regulators	Coordinated Regulator	Coordinated Regulator	ceh-18	ztf-9	M00681_2.00	M00636_2.00	ALA	23	6.74916	3.40783	6.22678e-08	0.000182546	0.0235857
co-occurence of coordinated regulators	Coordinated Regulator	Coordinated Regulator	ceh-18	ztf-11	M00681_2.00	M00650_2.00	ALA	32	16.3216	1.96059	1.21326e-05	4.9449e-05	0.0004606
co-occurence of coordinated regulators	Coordinated Regulator	Coordinated Regulator	ceh-18	nhr-6	M00681_2.00	M01298_2.00	ALA	29	10.9165	2.65653	9.70245e-08	4.85682e-05	0.000820454
co-occurence of coordinated regulators	Coordinated Regulator	Coordinated Regulator	ceh-14	ztf-3	M00435_2.00	M00640_2.00	ALA	27	10.5567	2.55761	7.65241e-07	0.000848318	0.00107996
co-occurence of coordinated regulators	Coordinated Regulator	Coordinated Regulator	ceh-14	ztf-9	M00435_2.00	M00636_2.00	ALA	24	8.39319	2.85946	6.52813e-07	0.000829181	0.0112129
co-occurence of coordinated regulators	Coordinated Regulator	Coordinated Regulator	ceh-14	ztf-11	M00435_2.00	M00650_2.00	ALA	38	20.2974	1.87216	1.66132e-06	4.02144e-05	0.00029501
co-occurence of coordinated regulators	Coordinated Regulator	Coordinated Regulator	ceh-14	nhr-6	M00435_2.00	M01298_2.00	ALA	36	13.5757	2.65181	5.35093e-10	0.000661485	0.00591123
co-occurence of coordinated regulators	Coordinated Regulator	Coordinated Regulator	ztf-3	ztf-9	M00640_2.00	M00636_2.00	ALA	19	4.88191	3.89192	1.84539e-07	0.00147198	0.00306869
co-occurence of coordinated regulators	Coordinated Regulator	Coordinated Regulator	ztf-3	ztf-11	M00640_2.00	M00650_2.00	ALA	26	11.806	2.20226	2.15549e-05	0.00266855	8.56252e-05
co-occurence of coordinated regulators	Coordinated Regulator	Coordinated Regulator	ztf-3	nhr-6	M00640_2.00	M01298_2.00	ALA	25	7.89629	3.16604	5.08835e-08	0.00112346	0.00139295
co-occurence of coordinated regulators	Coordinated Regulator	Coordinated Regulator	ztf-9	ztf-11	M00636_2.00	M00650_2.00	ALA	24	9.38644	2.55688	4.53605e-06	0.00508585	0.000177205
co-occurence of coordinated regulators	Coordinated Regulator	Coordinated Regulator	ztf-9	nhr-6	M00636_2.00	M01298_2.00	ALA	24	6.27799	3.82288	3.47889e-09	0.0144917	0.00139595
co-occurence of coordinated regulators	Coordinated Regulator	Coordinated Regulator	ztf-11	nhr-6	M00650_2.00	M01298_2.00	ALA	35	15.1822	2.30533	4.56614e-08	7.41665e-05	0.00126089
co-occurence of coordinated regulators	Coordinated Regulator	Coordinated Regulator	atf-7	ceh-38	M00595_2.00	M03716_2.00	ALM	55	20.6924	2.65798	2.43393e-12	0.00174537	1.30141e-06
co-occurence of coordinated regulators	Coordinated Regulator	Coordinated Regulator	atf-7	ceh-48	M00595_2.00	M01905_2.00	ALM	57	20.5471	2.77412	1.47785e-13	0.000615492	6.80328e-05
co-occurence of coordinated regulators	Coordinated Regulator	Coordinated Regulator	atf-7	ceh-74	M00595_2.00	M01248_2.00	ALM	49	9.62064	5.09322	6.92938e-21	0.00453307	1.96081e-06
co-occurence of coordinated regulators	Coordinated Regulator	Coordinated Regulator	atf-7	ceh-58	M00595_2.00	M00676_2.00	ALM	54	13.9086	3.88248	2.24772e-18	0.00394328	0.00281623
co-occurence of coordinated regulators	Coordinated Regulator	Coordinated Regulator	atf-7	unc-62	M00595_2.00	M02185_2.00	ALM	51	13.5422	3.76601	8.47948e-17	0.000111081	7.84818e-05
co-occurence of coordinated regulators	Coordinated Regulator	Coordinated Regulator	atf-7	ceh-18	M00595_2.00	M00681_2.00	ALM	59	19.5488	3.01809	1.28917e-15	0.000807787	1.38379e-07
co-occurence of coordinated regulators	Coordinated Regulator	Coordinated Regulator	atf-7	unc-86	M00595_2.00	M03312_2.00	ALM	65	29.1757	2.22788	1.35588e-11	0.000516077	1.759e-08
co-occurence of coordinated regulators	Coordinated Regulator	Coordinated Regulator	atf-7	unc-86	M00595_2.00	M02244_2.00	ALM	48	12.1943	3.93627	1.86551e-16	0.00896144	1.15114e-05
co-occurence of coordinated regulators	Coordinated Regulator	Coordinated Regulator	atf-7	vab-3	M00595_2.00	M00342_2.00	ALM	52	15.9874	3.25257	8.86976e-15	0.000172791	0.0116373
co-occurence of coordinated regulators	Coordinated Regulator	Coordinated Regulator	atf-7	hsf-1	M00595_2.00	M00682_2.00	ALM	61	24.9551	2.44439	2.29222e-12	0.000761447	1.01689e-07
co-occurence of coordinated regulators	Coordinated Regulator	Coordinated Regulator	atf-7	ztf-3	M00595_2.00	M00640_2.00	ALM	56	14.1403	3.96031	1.73187e-19	0.00184108	6.43186e-06
co-occurence of coordinated regulators	Coordinated Regulator	Coordinated Regulator	atf-7	ztf-9	M00595_2.00	M00636_2.00	ALM	42	11.2423	3.73588	1.16743e-13	0.000292135	0.00197457
co-occurence of coordinated regulators	Coordinated Regulator	Coordinated Regulator	atf-7	pag-3	M00595_2.00	M00619_2.00	ALM	58	20.8714	2.77892	7.41864e-14	0.00298702	2.52584e-10
co-occurence of coordinated regulators	Coordinated Regulator	Coordinated Regulator	atf-7	ztf-11	M00595_2.00	M00650_2.00	ALM	63	27.1876	2.31724	7.15247e-12	0.00210729	6.44816e-11
co-occurence of coordinated regulators	Coordinated Regulator	Coordinated Regulator	ceh-38	ceh-48	M03716_2.00	M01905_2.00	ALM	72	29.6744	2.42634	5.3067e-15	6.64654e-08	5.45669e-07
co-occurence of coordinated regulators	Coordinated Regulator	Coordinated Regulator	ceh-38	ceh-74	M03716_2.00	M01248_2.00	ALM	49	13.8943	3.52663	4.15939e-15	2.13926e-06	4.20848e-06
co-occurence of coordinated regulators	Coordinated Regulator	Coordinated Regulator	ceh-38	ceh-58	M03716_2.00	M00676_2.00	ALM	57	20.0871	2.83764	6.00208e-14	4.91382e-07	3.20393e-05
co-occurence of coordinated regulators	Coordinated Regulator	Coordinated Regulator	ceh-38	unc-62	M03716_2.00	M02185_2.00	ALM	49	19.5578	2.50539	4.45045e-10	1.77843e-06	1.42103e-05
co-occurence of coordinated regulators	Coordinated Regulator	Coordinated Regulator	ceh-38	ceh-18	M03716_2.00	M00681_2.00	ALM	65	28.2326	2.3023	3.35356e-12	9.19532e-07	1.01449e-08
co-occurence of coordinated regulators	Coordinated Regulator	Coordinated Regulator	ceh-38	unc-86	M03716_2.00	M03312_2.00	ALM	74	42.136	1.75622	9.05376e-09	1.46856e-08	2.94534e-11
co-occurence of coordinated regulators	Coordinated Regulator	Coordinated Regulator	ceh-38	unc-86	M03716_2.00	M02244_2.00	ALM	53	17.6112	3.00945	8.22585e-14	2.49452e-07	2.86166e-05
co-occurence of coordinated regulators	Coordinated Regulator	Coordinated Regulator	ceh-38	vab-3	M03716_2.00	M00342_2.00	ALM	58	23.0892	2.512	3.94188e-12	2.35676e-07	0.0026155
co-occurence of coordinated regulators	Coordinated Regulator	Coordinated Regulator	ceh-38	hsf-1	M03716_2.00	M00682_2.00	ALM	70	36.0406	1.94226	5.08639e-10	1.18826e-06	1.37512e-06
co-occurence of coordinated regulators	Coordinated Regulator	Coordinated Regulator	ceh-38	ztf-3	M03716_2.00	M00640_2.00	ALM	62	20.4217	3.03599	1.24924e-16	5.04348e-07	4.49689e-05
co-occurence of coordinated regulators	Coordinated Regulator	Coordinated Regulator	ceh-38	ztf-9	M03716_2.00	M00636_2.00	ALM	48	16.2363	2.95633	3.49542e-12	6.79351e-06	0.00255511
co-occurence of coordinated regulators	Coordinated Regulator	Coordinated Regulator	ceh-38	pag-3	M03716_2.00	M00619_2.00	ALM	60	30.1428	1.99053	1.03565e-08	3.80946e-06	1.9042e-09
co-occurence of coordinated regulators	Coordinated Regulator	Coordinated Regulator	ceh-38	ztf-11	M03716_2.00	M00650_2.00	ALM	73	39.2647	1.85918	1.02859e-09	2.44444e-07	1.42475e-10
co-occurence of coordinated regulators	Coordinated Regulator	Coordinated Regulator	ceh-48	ceh-74	M01905_2.00	M01248_2.00	ALM	49	13.7967	3.55157	3.27374e-15	5.26118e-06	5.8431e-06
co-occurence of coordinated regulators	Coordinated Regulator	Coordinated Regulator	ceh-48	ceh-58	M01905_2.00	M00676_2.00	ALM	59	19.946	2.95798	2.99583e-15	3.86624e-05	0.000339858
co-occurence of coordinated regulators	Coordinated Regulator	Coordinated Regulator	ceh-48	unc-62	M01905_2.00	M02185_2.00	ALM	53	19.4205	2.72908	2.90278e-12	0.000294499	1.17399e-06
co-occurence of coordinated regulators	Coordinated Regulator	Coordinated Regulator	ceh-48	ceh-18	M01905_2.00	M00681_2.00	ALM	63	28.0344	2.24724	2.53303e-11	0.000183219	3.78276e-09
co-occurence of coordinated regulators	Coordinated Regulator	Coordinated Regulator	ceh-48	unc-86	M01905_2.00	M03312_2.00	ALM	73	41.8401	1.74474	1.73983e-08	7.06224e-06	7.71337e-12
co-occurence of coordinated regulators	Coordinated Regulator	Coordinated Regulator	ceh-48	unc-86	M01905_2.00	M02244_2.00	ALM	52	17.4875	2.97355	2.42808e-13	4.53948e-06	3.86323e-06
co-occurence of coordinated regulators	Coordinated Regulator	Coordinated Regulator	ceh-48	vab-3	M01905_2.00	M00342_2.00	ALM	54	22.927	2.3553	3.18585e-10	1.0674e-06	0.000866119
co-occurence of coordinated regulators	Coordinated Regulator	Coordinated Regulator	ceh-48	hsf-1	M01905_2.00	M00682_2.00	ALM	72	35.7874	2.01188	4.26925e-11	4.7314e-05	1.71708e-07
co-occurence of coordinated regulators	Coordinated Regulator	Coordinated Regulator	ceh-48	ztf-3	M01905_2.00	M00640_2.00	ALM	62	20.2782	3.05746	9.14649e-17	1.40984e-05	5.40907e-06
co-occurence of coordinated regulators	Coordinated Regulator	Coordinated Regulator	ceh-48	ztf-9	M01905_2.00	M00636_2.00	ALM	48	16.1223	2.97724	2.76189e-12	0.00026379	0.000424997
co-occurence of coordinated regulators	Coordinated Regulator	Coordinated Regulator	ceh-48	pag-3	M01905_2.00	M00619_2.00	ALM	61	29.9311	2.03801	2.91185e-09	5.75496e-05	2.23122e-11
co-occurence of coordinated regulators	Coordinated Regulator	Coordinated Regulator	ceh-48	ztf-11	M01905_2.00	M00650_2.00	ALM	75	38.989	1.92362	8.85883e-11	6.63121e-05	2.60165e-10
co-occurence of coordinated regulators	Coordinated Regulator	Coordinated Regulator	ceh-74	ceh-58	M01248_2.00	M00676_2.00	ALM	49	9.33922	5.24669	2.30831e-21	0.000648752	1.71191e-05
co-occurence of coordinated regulators	Coordinated Regulator	Coordinated Regulator	ceh-74	unc-62	M01248_2.00	M02185_2.00	ALM	44	9.09315	4.83881	5.66432e-18	3.7665e-05	3.93882e-06
co-occurence of coordinated regulators	Coordinated Regulator	Coordinated Regulator	ceh-74	ceh-18	M01248_2.00	M00681_2.00	ALM	53	13.1264	4.03767	1.12214e-18	7.55022e-05	4.60262e-06
co-occurence of coordinated regulators	Coordinated Regulator	Coordinated Regulator	ceh-74	unc-86	M01248_2.00	M03312_2.00	ALM	55	19.5906	2.80747	3.15979e-13	4.01413e-05	1.87911e-08
co-occurence of coordinated regulators	Coordinated Regulator	Coordinated Regulator	ceh-74	unc-86	M01248_2.00	M02244_2.00	ALM	41	8.18808	5.00728	3.24981e-17	7.71512e-06	8.03789e-06
co-occurence of coordinated regulators	Coordinated Regulator	Coordinated Regulator	ceh-74	vab-3	M01248_2.00	M00342_2.00	ALM	49	10.735	4.56451	3.82149e-19	7.14854e-05	0.00526184
co-occurence of coordinated regulators	Coordinated Regulator	Coordinated Regulator	ceh-74	hsf-1	M01248_2.00	M00682_2.00	ALM	53	16.7566	3.16294	1.25894e-14	3.62873e-05	2.7638e-07
co-occurence of coordinated regulators	Coordinated Regulator	Coordinated Regulator	ceh-74	ztf-3	M01248_2.00	M00640_2.00	ALM	47	9.49477	4.95009	1.38809e-19	3.13603e-05	9.27785e-07
co-occurence of coordinated regulators	Coordinated Regulator	Coordinated Regulator	ceh-74	ztf-9	M01248_2.00	M00636_2.00	ALM	40	7.54887	5.29881	1.5059e-17	9.82602e-06	0.000358587
co-occurence of coordinated regulators	Coordinated Regulator	Coordinated Regulator	ceh-74	pag-3	M01248_2.00	M00619_2.00	ALM	50	14.0145	3.56774	1.29801e-15	2.42076e-05	2.64747e-09
co-occurence of coordinated regulators	Coordinated Regulator	Coordinated Regulator	ceh-74	ztf-11	M01248_2.00	M00650_2.00	ALM	56	18.2556	3.06755	5.2117e-15	3.83938e-05	7.50291e-09
co-occurence of coordinated regulators	Coordinated Regulator	Coordinated Regulator	ceh-58	unc-62	M00676_2.00	M02185_2.00	ALM	52	13.146	3.95556	5.80158e-18	0.000377408	1.41794e-05
co-occurence of coordinated regulators	Coordinated Regulator	Coordinated Regulator	ceh-58	ceh-18	M00676_2.00	M00681_2.00	ALM	64	18.9769	3.37252	2.27141e-19	0.000205661	1.48056e-06
co-occurence of coordinated regulators	Coordinated Regulator	Coordinated Regulator	ceh-58	unc-86	M00676_2.00	M03312_2.00	ALM	69	28.3223	2.43625	2.7573e-14	3.62503e-05	1.10717e-09
co-occurence of coordinated regulators	Coordinated Regulator	Coordinated Regulator	ceh-58	unc-86	M00676_2.00	M02244_2.00	ALM	49	11.8376	4.13936	1.40182e-17	0.000299691	1.27117e-06
co-occurence of coordinated regulators	Coordinated Regulator	Coordinated Regulator	ceh-58	vab-3	M00676_2.00	M00342_2.00	ALM	54	15.5197	3.47945	1.5923e-16	1.36689e-05	0.00653169
co-occurence of coordinated regulators	Coordinated Regulator	Coordinated Regulator	ceh-58	hsf-1	M00676_2.00	M00682_2.00	ALM	67	24.2251	2.76572	2.50398e-16	0.000669011	5.36677e-06
co-occurence of coordinated regulators	Coordinated Regulator	Coordinated Regulator	ceh-58	ztf-3	M00676_2.00	M00640_2.00	ALM	58	13.7267	4.22535	1.89586e-21	0.000445339	3.81928e-05
co-occurence of coordinated regulators	Coordinated Regulator	Coordinated Regulator	ceh-58	ztf-9	M00676_2.00	M00636_2.00	ALM	43	10.9135	3.94009	1.01685e-14	0.000441732	0.000341184
co-occurence of coordinated regulators	Coordinated Regulator	Coordinated Regulator	ceh-58	pag-3	M00676_2.00	M00619_2.00	ALM	61	20.2609	3.01073	3.51644e-16	0.000677972	6.04305e-09
co-occurence of coordinated regulators	Coordinated Regulator	Coordinated Regulator	ceh-58	ztf-11	M00676_2.00	M00650_2.00	ALM	72	26.3923	2.72807	1.53533e-17	0.000787746	5.69469e-09
co-occurence of coordinated regulators	Coordinated Regulator	Coordinated Regulator	unc-62	ceh-18	M02185_2.00	M00681_2.00	ALM	56	18.4769	3.03081	8.44201e-15	7.95252e-06	2.64227e-08
co-occurence of coordinated regulators	Coordinated Regulator	Coordinated Regulator	unc-62	unc-86	M02185_2.00	M03312_2.00	ALM	64	27.576	2.32085	4.00544e-12	1.92696e-05	2.26368e-09
co-occurence of coordinated regulators	Coordinated Regulator	Coordinated Regulator	unc-62	unc-86	M02185_2.00	M02244_2.00	ALM	45	11.5257	3.90432	2.80577e-15	2.30755e-05	1.02147e-06
co-occurence of coordinated regulators	Coordinated Regulator	Coordinated Regulator	unc-62	vab-3	M02185_2.00	M00342_2.00	ALM	50	15.1108	3.30889	1.96056e-14	2.05235e-05	0.00128271
co-occurence of coordinated regulators	Coordinated Regulator	Coordinated Regulator	unc-62	hsf-1	M02185_2.00	M00682_2.00	ALM	57	23.5868	2.4166	2.91702e-11	1.88713e-06	1.17152e-08
co-occurence of coordinated regulators	Coordinated Regulator	Coordinated Regulator	unc-62	ztf-3	M02185_2.00	M00640_2.00	ALM	52	13.365	3.89075	1.11627e-17	4.38411e-06	6.00407e-06
co-occurence of coordinated regulators	Coordinated Regulator	Coordinated Regulator	unc-62	ztf-9	M02185_2.00	M00636_2.00	ALM	43	10.6259	4.04671	4.36167e-15	3.34289e-05	0.0015281
co-occurence of coordinated regulators	Coordinated Regulator	Coordinated Regulator	unc-62	pag-3	M02185_2.00	M00619_2.00	ALM	58	19.727	2.94013	7.48116e-15	1.56123e-06	4.98853e-12
co-occurence of coordinated regulators	Coordinated Regulator	Coordinated Regulator	unc-62	ztf-11	M02185_2.00	M00650_2.00	ALM	61	25.6969	2.37383	7.48343e-12	2.77231e-06	8.89953e-11
co-occurence of coordinated regulators	Coordinated Regulator	Coordinated Regulator	ceh-18	unc-86	M00681_2.00	M03312_2.00	ALM	76	39.8073	1.9092	8.10054e-11	1.0354e-07	2.58861e-08
co-occurence of coordinated regulators	Coordinated Regulator	Coordinated Regulator	ceh-18	unc-86	M00681_2.00	M02244_2.00	ALM	55	16.6379	3.30571	5.52296e-16	4.14066e-07	5.71548e-06
co-occurence of coordinated regulators	Coordinated Regulator	Coordinated Regulator	ceh-18	vab-3	M00681_2.00	M00342_2.00	ALM	63	21.8131	2.88817	5.37364e-16	4.43427e-09	0.00469752
co-occurence of coordinated regulators	Coordinated Regulator	Coordinated Regulator	ceh-18	hsf-1	M00681_2.00	M00682_2.00	ALM	69	34.0487	2.02651	1.20929e-10	6.08007e-07	1.77158e-07
co-occurence of coordinated regulators	Coordinated Regulator	Coordinated Regulator	ceh-18	ztf-3	M00681_2.00	M00640_2.00	ALM	65	19.293	3.36909	1.05585e-19	3.92891e-06	2.30911e-06
co-occurence of coordinated regulators	Coordinated Regulator	Coordinated Regulator	ceh-18	ztf-9	M00681_2.00	M00636_2.00	ALM	50	15.339	3.25966	3.31847e-14	1.43852e-07	0.00747034
co-occurence of coordinated regulators	Coordinated Regulator	Coordinated Regulator	ceh-18	pag-3	M00681_2.00	M00619_2.00	ALM	64	28.4769	2.24744	1.53829e-11	5.74631e-08	2.13101e-10
co-occurence of coordinated regulators	Coordinated Regulator	Coordinated Regulator	ceh-18	ztf-11	M00681_2.00	M00650_2.00	ALM	74	37.0947	1.9949	2.49782e-11	4.75461e-08	5.15834e-10
co-occurence of coordinated regulators	Coordinated Regulator	Coordinated Regulator	unc-86	unc-86	M03312_2.00	M02244_2.00	ALM	59	24.8313	2.37603	2.01153e-11	7.02725e-10	2.75945e-06
co-occurence of coordinated regulators	Coordinated Regulator	Coordinated Regulator	unc-86	vab-3	M03312_2.00	M00342_2.00	ALM	67	32.5552	2.05804	1.52318e-10	2.15602e-09	0.00220172
co-occurence of coordinated regulators	Coordinated Regulator	Coordinated Regulator	unc-86	hsf-1	M03312_2.00	M00682_2.00	ALM	85	50.8163	1.67269	1.35784e-09	9.95166e-10	1.38993e-06
co-occurence of coordinated regulators	Coordinated Regulator	Coordinated Regulator	unc-86	ztf-3	M03312_2.00	M00640_2.00	ALM	73	28.794	2.53525	3.06088e-16	1.39897e-10	6.36221e-06
co-occurence of coordinated regulators	Coordinated Regulator	Coordinated Regulator	unc-86	ztf-9	M03312_2.00	M00636_2.00	ALM	54	22.8928	2.35882	3.02311e-10	2.79524e-08	0.00512115
co-occurence of coordinated regulators	Coordinated Regulator	Coordinated Regulator	unc-86	pag-3	M03312_2.00	M00619_2.00	ALM	74	42.5006	1.74115	1.32627e-08	2.04876e-09	2.07986e-10
co-occurence of coordinated regulators	Coordinated Regulator	Coordinated Regulator	unc-86	ztf-11	M03312_2.00	M00650_2.00	ALM	87	55.3622	1.57147	1.692e-08	1.03468e-09	2.55528e-12
co-occurence of coordinated regulators	Coordinated Regulator	Coordinated Regulator	unc-86	vab-3	M02244_2.00	M00342_2.00	ALM	48	13.6068	3.52766	8.65194e-15	6.08007e-07	0.00198933
co-occurence of coordinated regulators	Coordinated Regulator	Coordinated Regulator	unc-86	hsf-1	M02244_2.00	M00682_2.00	ALM	54	21.2392	2.54247	2.12964e-11	2.43592e-05	1.38845e-06
co-occurence of coordinated regulators	Coordinated Regulator	Coordinated Regulator	unc-86	ztf-3	M02244_2.00	M00640_2.00	ALM	52	12.0348	4.32082	1.91004e-19	1.42967e-05	5.7539e-06
co-occurence of coordinated regulators	Coordinated Regulator	Coordinated Regulator	unc-86	ztf-9	M02244_2.00	M00636_2.00	ALM	41	9.56829	4.28499	3.85172e-15	8.08896e-05	0.00204751
co-occurence of coordinated regulators	Coordinated Regulator	Coordinated Regulator	unc-86	pag-3	M02244_2.00	M00619_2.00	ALM	52	17.7635	2.92734	4.2448e-13	6.49638e-06	2.68119e-09
co-occurence of coordinated regulators	Coordinated Regulator	Coordinated Regulator	unc-86	ztf-11	M02244_2.00	M00650_2.00	ALM	61	23.1392	2.63622	1.02408e-13	1.66283e-05	2.26613e-10
co-occurence of coordinated regulators	Coordinated Regulator	Coordinated Regulator	vab-3	hsf-1	M00342_2.00	M00682_2.00	ALM	62	27.8457	2.22656	5.91695e-11	0.000743599	5.09905e-07
co-occurence of coordinated regulators	Coordinated Regulator	Coordinated Regulator	vab-3	ztf-3	M00342_2.00	M00640_2.00	ALM	54	15.7782	3.42244	2.99058e-16	0.0104571	2.83996e-06
co-occurence of coordinated regulators	Coordinated Regulator	Coordinated Regulator	vab-3	ztf-9	M00342_2.00	M00636_2.00	ALM	44	12.5445	3.5075	1.93085e-13	0.00332618	0.00112398
co-occurence of coordinated regulators	Coordinated Regulator	Coordinated Regulator	vab-3	pag-3	M00342_2.00	M00619_2.00	ALM	60	23.2889	2.57633	4.73146e-13	0.00452214	3.05157e-09
co-occurence of coordinated regulators	Coordinated Regulator	Coordinated Regulator	vab-3	ztf-11	M00342_2.00	M00650_2.00	ALM	66	30.3367	2.17558	2.28223e-11	0.00157555	5.89358e-10
co-occurence of coordinated regulators	Coordinated Regulator	Coordinated Regulator	hsf-1	ztf-3	M00682_2.00	M00640_2.00	ALM	68	24.6286	2.76101	1.39802e-16	3.55683e-06	7.51752e-05
co-occurence of coordinated regulators	Coordinated Regulator	Coordinated Regulator	hsf-1	ztf-9	M00682_2.00	M00636_2.00	ALM	51	19.5811	2.60455	4.44483e-11	1.04685e-06	0.00155643
co-occurence of coordinated regulators	Coordinated Regulator	Coordinated Regulator	hsf-1	pag-3	M00682_2.00	M00619_2.00	ALM	72	36.3524	1.98061	8.76392e-11	1.3415e-06	3.33513e-09
co-occurence of coordinated regulators	Coordinated Regulator	Coordinated Regulator	hsf-1	ztf-11	M00682_2.00	M00650_2.00	ALM	85	47.3534	1.79501	2.99702e-11	1.83567e-05	1.19588e-10
co-occurence of coordinated regulators	Coordinated Regulator	Coordinated Regulator	ztf-3	ztf-9	M00640_2.00	M00636_2.00	ALM	44	11.0953	3.96566	3.73486e-15	3.44453e-06	0.00344033
co-occurence of coordinated regulators	Coordinated Regulator	Coordinated Regulator	ztf-3	pag-3	M00640_2.00	M00619_2.00	ALM	62	20.5983	3.00995	1.76557e-16	5.97037e-05	9.77448e-11
co-occurence of coordinated regulators	Coordinated Regulator	Coordinated Regulator	ztf-3	ztf-11	M00640_2.00	M00650_2.00	ALM	68	26.8319	2.5343	7.93764e-15	5.75143e-06	1.32807e-12
co-occurence of coordinated regulators	Coordinated Regulator	Coordinated Regulator	ztf-9	pag-3	M00636_2.00	M00619_2.00	ALM	45	16.3768	2.74779	1.93337e-10	0.0016684	2.27705e-09
co-occurence of coordinated regulators	Coordinated Regulator	Coordinated Regulator	ztf-9	ztf-11	M00636_2.00	M00650_2.00	ALM	53	21.3328	2.48443	8.03824e-11	0.00452054	1.71686e-09
co-occurence of coordinated regulators	Coordinated Regulator	Coordinated Regulator	pag-3	ztf-11	M00619_2.00	M00650_2.00	ALM	76	39.6044	1.91898	6.30604e-11	1.12658e-09	4.93849e-11
co-occurence of coordinated regulators	Coordinated Regulator	Coordinated Regulator	ceh-38	ceh-48	M03716_2.00	M01905_2.00	ALN	43	15.1933	2.8302	1.19123e-12	0.00183898	0.0127583
co-occurence of coordinated regulators	Coordinated Regulator	Coordinated Regulator	ceh-38	ceh-74	M03716_2.00	M01248_2.00	ALN	30	7.11387	4.21711	3.62894e-12	0.000110014	0.0012031
co-occurence of coordinated regulators	Coordinated Regulator	Coordinated Regulator	ceh-38	ceh-58	M03716_2.00	M00676_2.00	ALN	35	10.2846	3.40315	6.89252e-12	0.000641238	0.000330012
co-occurence of coordinated regulators	Coordinated Regulator	Coordinated Regulator	ceh-38	ceh-18	M03716_2.00	M00681_2.00	ALN	35	14.4551	2.42129	4.37526e-08	0.00073514	5.65407e-06
co-occurence of coordinated regulators	Coordinated Regulator	Coordinated Regulator	ceh-38	unc-86	M03716_2.00	M03312_2.00	ALN	44	21.5736	2.03953	2.02906e-08	0.000206651	1.04287e-08
co-occurence of coordinated regulators	Coordinated Regulator	Coordinated Regulator	ceh-38	unc-86	M03716_2.00	M02244_2.00	ALN	31	9.01692	3.43798	1.67213e-10	0.00101258	6.12976e-06
co-occurence of coordinated regulators	Coordinated Regulator	Coordinated Regulator	ceh-38	ztf-3	M03716_2.00	M00640_2.00	ALN	33	10.4559	3.15612	2.54231e-10	0.00107461	2.49445e-05
co-occurence of coordinated regulators	Coordinated Regulator	Coordinated Regulator	ceh-38	ztf-9	M03716_2.00	M00636_2.00	ALN	30	8.31301	3.6088	1.27547e-10	0.00194474	9.55539e-05
co-occurence of coordinated regulators	Coordinated Regulator	Coordinated Regulator	ceh-38	ztf-11	M03716_2.00	M00650_2.00	ALN	42	20.1035	2.08919	3.38286e-08	0.00384913	1.1329e-06
co-occurence of coordinated regulators	Coordinated Regulator	Coordinated Regulator	ceh-48	ceh-74	M01905_2.00	M01248_2.00	ALN	29	7.06391	4.10538	1.73955e-11	0.00250182	0.000660651
co-occurence of coordinated regulators	Coordinated Regulator	Coordinated Regulator	ceh-48	ceh-58	M01905_2.00	M00676_2.00	ALN	35	10.2124	3.42722	5.73551e-12	0.00553104	0.00011558
co-occurence of coordinated regulators	Coordinated Regulator	Coordinated Regulator	ceh-48	ceh-18	M01905_2.00	M00681_2.00	ALN	34	14.3536	2.36875	1.35746e-07	0.0153523	1.75978e-05
co-occurence of coordinated regulators	Coordinated Regulator	Coordinated Regulator	ceh-48	unc-86	M01905_2.00	M03312_2.00	ALN	41	21.4221	1.91391	7.52068e-07	0.00361045	9.68758e-08
co-occurence of coordinated regulators	Coordinated Regulator	Coordinated Regulator	ceh-48	unc-86	M01905_2.00	M02244_2.00	ALN	31	8.9536	3.4623	1.4167e-10	0.00611767	9.29037e-06
co-occurence of coordinated regulators	Coordinated Regulator	Coordinated Regulator	ceh-48	ztf-3	M01905_2.00	M00640_2.00	ALN	32	10.3825	3.08212	9.90017e-10	0.0122256	1.37438e-05
co-occurence of coordinated regulators	Coordinated Regulator	Coordinated Regulator	ceh-48	ztf-9	M01905_2.00	M00636_2.00	ALN	29	8.25463	3.51318	5.39627e-10	0.0230246	4.52835e-05
co-occurence of coordinated regulators	Coordinated Regulator	Coordinated Regulator	ceh-48	ztf-11	M01905_2.00	M00650_2.00	ALN	40	19.9623	2.00377	3.54986e-07	0.0284156	6.41368e-07
co-occurence of coordinated regulators	Coordinated Regulator	Coordinated Regulator	ceh-74	ceh-58	M01248_2.00	M00676_2.00	ALN	30	4.78168	6.27395	2.8611e-16	0.00161798	0.000215525
co-occurence of coordinated regulators	Coordinated Regulator	Coordinated Regulator	ceh-74	ceh-18	M01248_2.00	M00681_2.00	ALN	30	6.72071	4.46382	9.67702e-13	0.00209774	3.06121e-06
co-occurence of coordinated regulators	Coordinated Regulator	Coordinated Regulator	ceh-74	unc-86	M01248_2.00	M03312_2.00	ALN	34	10.0304	3.3897	1.84206e-11	0.00075834	4.52937e-08
co-occurence of coordinated regulators	Coordinated Regulator	Coordinated Regulator	ceh-74	unc-86	M01248_2.00	M02244_2.00	ALN	27	4.1923	6.44039	7.61863e-15	0.00051665	3.0112e-06
co-occurence of coordinated regulators	Coordinated Regulator	Coordinated Regulator	ceh-74	ztf-3	M01248_2.00	M00640_2.00	ALN	31	4.86132	6.37686	5.33785e-17	0.000566954	9.76336e-07
co-occurence of coordinated regulators	Coordinated Regulator	Coordinated Regulator	ceh-74	ztf-9	M01248_2.00	M00636_2.00	ALN	28	3.86502	7.24446	1.47287e-16	0.000478668	7.51673e-06
co-occurence of coordinated regulators	Coordinated Regulator	Coordinated Regulator	ceh-74	ztf-11	M01248_2.00	M00650_2.00	ALN	33	9.34686	3.5306	1.58159e-11	0.0011786	4.72658e-07
co-occurence of coordinated regulators	Coordinated Regulator	Coordinated Regulator	ceh-58	ceh-18	M00676_2.00	M00681_2.00	ALN	35	9.71619	3.60224	1.52224e-12	0.00302928	4.54206e-05
co-occurence of coordinated regulators	Coordinated Regulator	Coordinated Regulator	ceh-58	unc-86	M00676_2.00	M03312_2.00	ALN	41	14.501	2.82739	7.2599e-12	0.00176801	1.39313e-06
co-occurence of coordinated regulators	Coordinated Regulator	Coordinated Regulator	ceh-58	unc-86	M00676_2.00	M02244_2.00	ALN	30	6.06084	4.94981	8.56203e-14	0.000328576	8.14296e-07
co-occurence of coordinated regulators	Coordinated Regulator	Coordinated Regulator	ceh-58	ztf-3	M00676_2.00	M00640_2.00	ALN	34	7.02806	4.83775	1.56728e-15	0.000218839	2.74455e-05
co-occurence of coordinated regulators	Coordinated Regulator	Coordinated Regulator	ceh-58	ztf-9	M00676_2.00	M00636_2.00	ALN	30	5.5877	5.36894	1.20937e-14	0.00108698	9.72791e-05
co-occurence of coordinated regulators	Coordinated Regulator	Coordinated Regulator	ceh-58	ztf-11	M00676_2.00	M00650_2.00	ALN	41	13.5128	3.03415	8.16756e-13	0.00219132	8.1647e-07
co-occurence of coordinated regulators	Coordinated Regulator	Coordinated Regulator	ceh-18	unc-86	M00681_2.00	M03312_2.00	ALN	41	20.3813	2.01164	1.83883e-07	0.000124724	1.72505e-07
co-occurence of coordinated regulators	Coordinated Regulator	Coordinated Regulator	ceh-18	unc-86	M00681_2.00	M02244_2.00	ALN	34	8.51858	3.99127	2.67216e-13	2.13203e-05	3.46385e-06
co-occurence of coordinated regulators	Coordinated Regulator	Coordinated Regulator	ceh-18	ztf-3	M00681_2.00	M00640_2.00	ALN	36	9.87802	3.64445	4.25898e-13	0.00117254	1.42563e-05
co-occurence of coordinated regulators	Coordinated Regulator	Coordinated Regulator	ceh-18	ztf-9	M00681_2.00	M00636_2.00	ALN	30	7.85357	3.81992	3.52072e-11	4.51128e-06	0.000190099
co-occurence of coordinated regulators	Coordinated Regulator	Coordinated Regulator	ceh-18	ztf-11	M00681_2.00	M00650_2.00	ALN	37	18.9925	1.94814	3.31578e-06	1.75027e-05	1.49223e-07
co-occurence of coordinated regulators	Coordinated Regulator	Coordinated Regulator	unc-86	unc-86	M03312_2.00	M02244_2.00	ALN	36	12.7136	2.83161	3.96041e-10	2.64168e-07	4.02996e-06
co-occurence of coordinated regulators	Coordinated Regulator	Coordinated Regulator	unc-86	ztf-3	M03312_2.00	M00640_2.00	ALN	41	14.7425	2.78107	1.20534e-11	5.14203e-07	6.16972e-05
co-occurence of coordinated regulators	Coordinated Regulator	Coordinated Regulator	unc-86	ztf-9	M03312_2.00	M00636_2.00	ALN	35	11.7211	2.98606	2.11929e-10	1.33078e-07	6.0107e-05
co-occurence of coordinated regulators	Coordinated Regulator	Coordinated Regulator	unc-86	ztf-11	M03312_2.00	M00650_2.00	ALN	46	28.3455	1.62283	8.66538e-06	1.01544e-07	2.7496e-07
co-occurence of coordinated regulators	Coordinated Regulator	Coordinated Regulator	unc-86	ztf-3	M02244_2.00	M00640_2.00	ALN	32	6.16179	5.19329	2.59527e-15	6.02993e-05	2.0837e-06
co-occurence of coordinated regulators	Coordinated Regulator	Coordinated Regulator	unc-86	ztf-9	M02244_2.00	M00636_2.00	ALN	29	4.89896	5.91962	4.09654e-15	2.20758e-06	0.000240496
co-occurence of coordinated regulators	Coordinated Regulator	Coordinated Regulator	unc-86	ztf-11	M02244_2.00	M00650_2.00	ALN	35	11.8473	2.95427	2.80033e-10	5.26937e-06	3.30252e-08
co-occurence of coordinated regulators	Coordinated Regulator	Coordinated Regulator	ztf-3	ztf-9	M00640_2.00	M00636_2.00	ALN	29	5.68077	5.10494	1.27394e-13	3.72542e-05	0.000205855
co-occurence of coordinated regulators	Coordinated Regulator	Coordinated Regulator	ztf-3	ztf-11	M00640_2.00	M00650_2.00	ALN	37	13.7379	2.69327	7.19731e-10	3.60865e-05	3.16951e-07
co-occurence of coordinated regulators	Coordinated Regulator	Coordinated Regulator	ztf-9	ztf-11	M00636_2.00	M00650_2.00	ALN	34	10.9224	3.11287	1.6091e-10	0.000119158	4.28405e-07
co-occurence of coordinated regulators	Coordinated Regulator	Coordinated Regulator	ceh-38	ceh-48	M03716_2.00	M01905_2.00	AQR	39	16.6176	2.3469	1.67681e-08	0.00156236	0.00375913
co-occurence of coordinated regulators	Coordinated Regulator	Coordinated Regulator	ceh-38	ceh-74	M03716_2.00	M01248_2.00	AQR	21	7.78079	2.69895	1.71102e-05	0.00451633	0.00997509
co-occurence of coordinated regulators	Coordinated Regulator	Coordinated Regulator	ceh-38	unc-62	M03716_2.00	M02185_2.00	AQR	23	10.9524	2.1	0.000286636	0.00180428	0.000236372
co-occurence of coordinated regulators	Coordinated Regulator	Coordinated Regulator	ceh-38	unc-86	M03716_2.00	M03312_2.00	AQR	41	23.5962	1.73757	2.00341e-05	0.000968456	3.65634e-07
co-occurence of coordinated regulators	Coordinated Regulator	Coordinated Regulator	ceh-38	unc-86	M03716_2.00	M02244_2.00	AQR	27	9.86226	2.73771	5.08356e-07	0.011738	0.00500626
co-occurence of coordinated regulators	Coordinated Regulator	Coordinated Regulator	ceh-38	egl-13	M03716_2.00	M00710_2.00	AQR	41	19.963	2.0538	2.21214e-07	0.0113812	0.000299177
co-occurence of coordinated regulators	Coordinated Regulator	Coordinated Regulator	ceh-38	ztf-3	M03716_2.00	M00640_2.00	AQR	28	11.4361	2.44838	2.49913e-06	0.0035044	0.0104347
co-occurence of coordinated regulators	Coordinated Regulator	Coordinated Regulator	ceh-38	ztf-9	M03716_2.00	M00636_2.00	AQR	21	9.09235	2.30963	0.000159176	0.0413735	0.00163368
co-occurence of coordinated regulators	Coordinated Regulator	Coordinated Regulator	ceh-38	ztf-11	M03716_2.00	M00650_2.00	AQR	41	21.9882	1.86463	3.10699e-06	0.00544908	4.94964e-06
co-occurence of coordinated regulators	Coordinated Regulator	Coordinated Regulator	ceh-48	ceh-74	M01905_2.00	M01248_2.00	AQR	21	7.72615	2.71804	1.54274e-05	0.0117467	0.019378
co-occurence of coordinated regulators	Coordinated Regulator	Coordinated Regulator	ceh-48	unc-62	M01905_2.00	M02185_2.00	AQR	26	10.8755	2.3907	1.02647e-05	0.0123356	0.000234203
co-occurence of coordinated regulators	Coordinated Regulator	Coordinated Regulator	ceh-48	unc-86	M01905_2.00	M03312_2.00	AQR	45	23.4305	1.92058	2.01366e-07	0.00920274	3.72027e-07
co-occurence of coordinated regulators	Coordinated Regulator	Coordinated Regulator	ceh-48	unc-86	M01905_2.00	M02244_2.00	AQR	28	9.793	2.85919	1.19657e-07	0.0198814	0.00544565
co-occurence of coordinated regulators	Coordinated Regulator	Coordinated Regulator	ceh-48	egl-13	M01905_2.00	M00710_2.00	AQR	44	19.8228	2.21967	4.05269e-09	0.036243	0.00176799
co-occurence of coordinated regulators	Coordinated Regulator	Coordinated Regulator	ceh-48	ztf-3	M01905_2.00	M00640_2.00	AQR	31	11.3558	2.72988	4.98956e-08	0.0232394	0.0014084
co-occurence of coordinated regulators	Coordinated Regulator	Coordinated Regulator	ceh-48	ztf-11	M01905_2.00	M00650_2.00	AQR	44	21.8338	2.01522	7.85367e-08	0.0187765	8.00411e-07
co-occurence of coordinated regulators	Coordinated Regulator	Coordinated Regulator	ceh-74	unc-62	M01248_2.00	M02185_2.00	AQR	19	5.09216	3.73122	5.39069e-07	0.00100388	0.00140602
co-occurence of coordinated regulators	Coordinated Regulator	Coordinated Regulator	ceh-74	unc-86	M01248_2.00	M03312_2.00	AQR	26	10.9707	2.36994	1.19601e-05	0.0177162	0.000194003
co-occurence of coordinated regulators	Coordinated Regulator	Coordinated Regulator	ceh-74	unc-86	M01248_2.00	M02244_2.00	AQR	17	4.58532	3.70748	2.52358e-06	0.000154983	0.000683529
co-occurence of coordinated regulators	Coordinated Regulator	Coordinated Regulator	ceh-74	egl-13	M01248_2.00	M00710_2.00	AQR	25	9.28152	2.69353	2.09965e-06	0.0222967	0.000201887
co-occurence of coordinated regulators	Coordinated Regulator	Coordinated Regulator	ceh-74	daf-19	M01248_2.00	M00709_2.00	AQR	12	3.20735	3.74141	8.07245e-05	0.0228122	0.0115043
co-occurence of coordinated regulators	Coordinated Regulator	Coordinated Regulator	ceh-74	ztf-3	M01248_2.00	M00640_2.00	AQR	20	5.31707	3.76147	2.27949e-07	0.00831543	0.000602691
co-occurence of coordinated regulators	Coordinated Regulator	Coordinated Regulator	ceh-74	ztf-9	M01248_2.00	M00636_2.00	AQR	16	4.22737	3.78486	4.02455e-06	0.00293735	0.000109289
co-occurence of coordinated regulators	Coordinated Regulator	Coordinated Regulator	ceh-74	ztf-11	M01248_2.00	M00650_2.00	AQR	26	10.2231	2.54325	3.41302e-06	0.0177162	6.85866e-05
co-occurence of coordinated regulators	Coordinated Regulator	Coordinated Regulator	unc-62	unc-86	M02185_2.00	M03312_2.00	AQR	32	15.4426	2.07219	1.12727e-05	0.0033835	2.9684e-05
co-occurence of coordinated regulators	Coordinated Regulator	Coordinated Regulator	unc-62	unc-86	M02185_2.00	M02244_2.00	AQR	24	6.45438	3.7184	1.29904e-08	0.000371145	0.000529865
co-occurence of coordinated regulators	Coordinated Regulator	Coordinated Regulator	unc-62	egl-13	M02185_2.00	M00710_2.00	AQR	29	13.0648	2.2197	1.0272e-05	0.000695853	8.97473e-06
co-occurence of coordinated regulators	Coordinated Regulator	Coordinated Regulator	unc-62	ztf-3	M02185_2.00	M00640_2.00	AQR	24	7.48441	3.20667	1.81213e-07	0.000852719	0.000642663
co-occurence of coordinated regulators	Coordinated Regulator	Coordinated Regulator	unc-62	ztf-9	M02185_2.00	M00636_2.00	AQR	22	5.95052	3.69716	6.62186e-08	0.00420652	0.00471582
co-occurence of coordinated regulators	Coordinated Regulator	Coordinated Regulator	unc-62	ztf-11	M02185_2.00	M00650_2.00	AQR	31	14.3903	2.15423	7.73084e-06	0.00134111	6.86219e-07
co-occurence of coordinated regulators	Coordinated Regulator	Coordinated Regulator	unc-86	unc-86	M03312_2.00	M02244_2.00	AQR	36	13.9055	2.5889	7.86736e-09	4.56235e-05	0.00237074
co-occurence of coordinated regulators	Coordinated Regulator	Coordinated Regulator	unc-86	egl-13	M03312_2.00	M00710_2.00	AQR	53	28.1473	1.88295	3.60828e-09	4.71865e-06	0.000400818
co-occurence of coordinated regulators	Coordinated Regulator	Coordinated Regulator	unc-86	daf-19	M03312_2.00	M00709_2.00	AQR	23	9.72667	2.36463	4.81064e-05	0.0013316	0.00202789
co-occurence of coordinated regulators	Coordinated Regulator	Coordinated Regulator	unc-86	ztf-3	M03312_2.00	M00640_2.00	AQR	38	16.1247	2.35664	2.70099e-08	3.13533e-06	0.00303166
co-occurence of coordinated regulators	Coordinated Regulator	Coordinated Regulator	unc-86	ztf-9	M03312_2.00	M00636_2.00	AQR	27	12.82	2.10609	6.15475e-05	0.000119222	0.0151988
co-occurence of coordinated regulators	Coordinated Regulator	Coordinated Regulator	unc-86	ztf-11	M03312_2.00	M00650_2.00	AQR	55	31.0029	1.77403	9.58707e-09	3.05635e-06	4.95853e-07
co-occurence of coordinated regulators	Coordinated Regulator	Coordinated Regulator	unc-86	egl-13	M02244_2.00	M00710_2.00	AQR	34	11.7644	2.89006	1.87596e-09	0.00508833	0.000489076
co-occurence of coordinated regulators	Coordinated Regulator	Coordinated Regulator	unc-86	ztf-3	M02244_2.00	M00640_2.00	AQR	26	6.73946	3.85788	1.32835e-09	0.003903	0.00118838
co-occurence of coordinated regulators	Coordinated Regulator	Coordinated Regulator	unc-86	ztf-9	M02244_2.00	M00636_2.00	AQR	22	5.35824	4.10582	1.15442e-08	0.000105629	0.00312985
co-occurence of coordinated regulators	Coordinated Regulator	Coordinated Regulator	unc-86	ztf-11	M02244_2.00	M00650_2.00	AQR	35	12.958	2.70104	5.11554e-09	0.00258782	4.37198e-08
co-occurence of coordinated regulators	Coordinated Regulator	Coordinated Regulator	egl-13	daf-19	M00710_2.00	M00709_2.00	AQR	21	8.22902	2.55195	3.86834e-05	0.00637663	0.00124293
co-occurence of coordinated regulators	Coordinated Regulator	Coordinated Regulator	egl-13	ztf-3	M00710_2.00	M00640_2.00	AQR	36	13.6419	2.63893	4.81897e-09	0.000132618	0.00277858
co-occurence of coordinated regulators	Coordinated Regulator	Coordinated Regulator	egl-13	ztf-9	M00710_2.00	M00636_2.00	AQR	26	10.846	2.39719	9.78757e-06	8.62658e-05	0.00152759
co-occurence of coordinated regulators	Coordinated Regulator	Coordinated Regulator	egl-13	ztf-11	M00710_2.00	M00650_2.00	AQR	55	26.2292	2.0969	1.07614e-11	0.00282456	8.0094e-07
co-occurence of coordinated regulators	Coordinated Regulator	Coordinated Regulator	daf-19	ztf-11	M00709_2.00	M00650_2.00	AQR	20	9.06385	2.20657	0.000434462	0.00172087	0.000246987
co-occurence of coordinated regulators	Coordinated Regulator	Coordinated Regulator	ztf-3	ztf-9	M00640_2.00	M00636_2.00	AQR	22	6.21334	3.54077	1.34932e-07	0.00227437	0.0125708
co-occurence of coordinated regulators	Coordinated Regulator	Coordinated Regulator	ztf-3	ztf-11	M00640_2.00	M00650_2.00	AQR	35	15.0259	2.32932	1.95219e-07	0.00716797	2.72695e-07
co-occurence of coordinated regulators	Coordinated Regulator	Coordinated Regulator	ztf-9	ztf-11	M00636_2.00	M00650_2.00	AQR	27	11.9464	2.2601	1.76594e-05	0.00508585	2.97586e-07
co-occurence of coordinated regulators	Coordinated Regulator	Coordinated Regulator	ceh-38	ceh-74	M03716_2.00	M01248_2.00	AS	26	6.78041	3.83458	8.84389e-10	0.0148516	0.00118509
co-occurence of coordinated regulators	Coordinated Regulator	Coordinated Regulator	ceh-38	ceh-58	M03716_2.00	M00676_2.00	AS	29	9.8025	2.95843	1.71573e-08	0.000879094	3.20543e-05
co-occurence of coordinated regulators	Coordinated Regulator	Coordinated Regulator	ceh-38	unc-62	M03716_2.00	M02185_2.00	AS	30	9.54422	3.14326	2.18685e-09	0.00299472	2.49594e-06
co-occurence of coordinated regulators	Coordinated Regulator	Coordinated Regulator	ceh-38	ceh-18	M03716_2.00	M00681_2.00	AS	32	13.7775	2.32262	5.09414e-07	0.0233271	5.37318e-07
co-occurence of coordinated regulators	Coordinated Regulator	Coordinated Regulator	ceh-38	vab-3	M03716_2.00	M00342_2.00	AS	29	11.2675	2.57377	3.19344e-07	0.00224437	0.00189051
co-occurence of coordinated regulators	Coordinated Regulator	Coordinated Regulator	ceh-38	lin-39	M03716_2.00	M08211_2.00	AS	35	12.4134	2.81953	6.38613e-10	0.00487777	0.000193043
co-occurence of coordinated regulators	Coordinated Regulator	Coordinated Regulator	ceh-38	ceh-13	M03716_2.00	M00450_2.00	AS	28	9.81289	2.85339	7.2259e-08	0.00189966	9.48159e-05
co-occurence of coordinated regulators	Coordinated Regulator	Coordinated Regulator	ceh-38	mab-5	M03716_2.00	M01240_2.00	AS	38	14.5034	2.62008	4.57987e-10	0.0123073	1.32497e-06
co-occurence of coordinated regulators	Coordinated Regulator	Coordinated Regulator	ceh-38	unc-3	M03716_2.00	OH2011_UNC-3	AS	26	6.06644	4.28587	9.48354e-11	0.0250577	0.00274807
co-occurence of coordinated regulators	Coordinated Regulator	Coordinated Regulator	ceh-38	ztf-3	M03716_2.00	M00640_2.00	AS	30	9.96577	3.0103	5.69651e-09	0.0242151	1.42748e-05
co-occurence of coordinated regulators	Coordinated Regulator	Coordinated Regulator	ceh-38	ztf-9	M03716_2.00	M00636_2.00	AS	30	7.92334	3.78628	3.23859e-11	0.039504	6.978e-05
co-occurence of coordinated regulators	Coordinated Regulator	Coordinated Regulator	ceh-38	syd-9	M03716_2.00	M00646_2.00	AS	36	11.9652	3.00874	5.05564e-11	0.0227667	8.38285e-06
co-occurence of coordinated regulators	Coordinated Regulator	Coordinated Regulator	ceh-38	ztf-11	M03716_2.00	M00650_2.00	AS	40	19.1612	2.08755	7.1253e-08	0.0248337	3.68876e-07
co-occurence of coordinated regulators	Coordinated Regulator	Coordinated Regulator	ceh-38	elt-1	M03716_2.00	M08206_2.00	AS	26	9.67781	2.68656	8.27426e-07	0.00972014	2.48654e-06
co-occurence of coordinated regulators	Coordinated Regulator	Coordinated Regulator	ceh-74	ceh-58	M01248_2.00	M00676_2.00	AS	23	4.55754	5.04659	8.34833e-11	0.00292795	7.23456e-05
co-occurence of coordinated regulators	Coordinated Regulator	Coordinated Regulator	ceh-74	unc-62	M01248_2.00	M02185_2.00	AS	24	4.43746	5.4085	7.90535e-12	0.000960004	2.64158e-05
co-occurence of coordinated regulators	Coordinated Regulator	Coordinated Regulator	ceh-74	ceh-18	M01248_2.00	M00681_2.00	AS	25	6.40567	3.90279	1.48772e-09	0.00922735	6.00618e-07
co-occurence of coordinated regulators	Coordinated Regulator	Coordinated Regulator	ceh-74	vab-3	M01248_2.00	M00342_2.00	AS	27	5.23868	5.15397	7.40064e-13	0.00816384	0.00173445
co-occurence of coordinated regulators	Coordinated Regulator	Coordinated Regulator	ceh-74	lin-39	M01248_2.00	M08211_2.00	AS	26	5.77145	4.50493	3.48754e-11	0.00198367	0.0018752
co-occurence of coordinated regulators	Coordinated Regulator	Coordinated Regulator	ceh-74	ceh-13	M01248_2.00	M00450_2.00	AS	25	4.56237	5.47961	1.99352e-12	0.00706926	0.000346861
co-occurence of coordinated regulators	Coordinated Regulator	Coordinated Regulator	ceh-74	mab-5	M01248_2.00	M01240_2.00	AS	27	6.74314	4.00407	1.48919e-10	0.00594488	1.00875e-06
co-occurence of coordinated regulators	Coordinated Regulator	Coordinated Regulator	ceh-74	gei-3	M01248_2.00	M00711_2.00	AS	22	4.71281	4.66812	9.12282e-10	0.0114074	6.68549e-05
co-occurence of coordinated regulators	Coordinated Regulator	Coordinated Regulator	ceh-74	unc-3	M01248_2.00	OH2011_UNC-3	AS	23	2.82051	8.15455	1.12834e-14	0.000178694	0.000869486
co-occurence of coordinated regulators	Coordinated Regulator	Coordinated Regulator	ceh-74	ztf-3	M01248_2.00	M00640_2.00	AS	27	4.63345	5.82719	5.24561e-14	0.00306037	4.56275e-06
co-occurence of coordinated regulators	Coordinated Regulator	Coordinated Regulator	ceh-74	ztf-9	M01248_2.00	M00636_2.00	AS	25	3.68385	6.78638	2.69025e-14	0.00221953	3.00245e-06
co-occurence of coordinated regulators	Coordinated Regulator	Coordinated Regulator	ceh-74	syd-9	M01248_2.00	M00646_2.00	AS	28	5.56304	5.03322	4.06723e-13	0.00430623	7.06167e-06
co-occurence of coordinated regulators	Coordinated Regulator	Coordinated Regulator	ceh-74	ztf-11	M01248_2.00	M00650_2.00	AS	28	8.90873	3.14298	9.92593e-09	0.00430623	2.05771e-06
co-occurence of coordinated regulators	Coordinated Regulator	Coordinated Regulator	ceh-74	elt-1	M01248_2.00	M08206_2.00	AS	22	4.49957	4.88936	4.08725e-10	0.00220473	8.82928e-06
co-occurence of coordinated regulators	Coordinated Regulator	Coordinated Regulator	ceh-58	unc-62	M00676_2.00	M02185_2.00	AS	26	6.41527	4.05283	2.91363e-10	0.00014198	0.000254661
co-occurence of coordinated regulators	Coordinated Regulator	Coordinated Regulator	ceh-58	ceh-18	M00676_2.00	M00681_2.00	AS	28	9.26074	3.02352	2.21483e-08	0.000358221	2.94346e-06
co-occurence of coordinated regulators	Coordinated Regulator	Coordinated Regulator	ceh-58	vab-3	M00676_2.00	M00342_2.00	AS	28	7.57361	3.69705	3.27176e-10	5.00502e-05	0.0142026
co-occurence of coordinated regulators	Coordinated Regulator	Coordinated Regulator	ceh-58	lin-39	M00676_2.00	M08211_2.00	AS	31	8.34384	3.71531	1.9979e-11	6.8312e-05	0.00620896
co-occurence of coordinated regulators	Coordinated Regulator	Coordinated Regulator	ceh-58	ceh-13	M00676_2.00	M00450_2.00	AS	28	6.59586	4.24509	1.68215e-11	0.000124658	0.000682672
co-occurence of coordinated regulators	Coordinated Regulator	Coordinated Regulator	ceh-58	mab-5	M00676_2.00	M01240_2.00	AS	33	9.74862	3.38509	3.174e-11	0.000351889	3.02764e-06
co-occurence of coordinated regulators	Coordinated Regulator	Coordinated Regulator	ceh-58	gei-3	M00676_2.00	M00711_2.00	AS	24	6.81336	3.52249	2.27221e-08	0.00131028	0.000214113
co-occurence of coordinated regulators	Coordinated Regulator	Coordinated Regulator	ceh-58	unc-3	M00676_2.00	OH2011_UNC-3	AS	23	4.07764	5.64052	1.10274e-11	0.000211896	0.00770064
co-occurence of coordinated regulators	Coordinated Regulator	Coordinated Regulator	ceh-58	ztf-3	M00676_2.00	M00640_2.00	AS	27	6.69862	4.03068	1.29742e-10	6.98173e-05	1.18747e-05
co-occurence of coordinated regulators	Coordinated Regulator	Coordinated Regulator	ceh-58	ztf-9	M00676_2.00	M00636_2.00	AS	25	5.32577	4.69415	4.18458e-11	2.30866e-05	1.32296e-06
co-occurence of coordinated regulators	Coordinated Regulator	Coordinated Regulator	ceh-58	syd-9	M00676_2.00	M00646_2.00	AS	29	8.04254	3.60583	2.35696e-10	6.04295e-05	3.90291e-05
co-occurence of coordinated regulators	Coordinated Regulator	Coordinated Regulator	ceh-58	ztf-11	M00676_2.00	M00650_2.00	AS	34	12.8794	2.63987	7.03926e-09	0.000314985	7.16494e-07
co-occurence of coordinated regulators	Coordinated Regulator	Coordinated Regulator	ceh-58	elt-1	M00676_2.00	M08206_2.00	AS	23	6.50507	3.53571	4.59808e-08	1.54097e-05	1.27117e-06
co-occurence of coordinated regulators	Coordinated Regulator	Coordinated Regulator	unc-62	ceh-18	M02185_2.00	M00681_2.00	AS	30	9.01674	3.32714	6.11659e-10	2.2701e-05	4.57867e-09
co-occurence of coordinated regulators	Coordinated Regulator	Coordinated Regulator	unc-62	vab-3	M02185_2.00	M00342_2.00	AS	28	7.37407	3.79709	1.84545e-10	1.83175e-05	0.000311957
co-occurence of coordinated regulators	Coordinated Regulator	Coordinated Regulator	unc-62	lin-39	M02185_2.00	M08211_2.00	AS	35	8.124	4.30822	7.3299e-15	4.14559e-05	1.7721e-05
co-occurence of coordinated regulators	Coordinated Regulator	Coordinated Regulator	unc-62	ceh-13	M02185_2.00	M00450_2.00	AS	26	6.42207	4.04854	2.97723e-10	1.68233e-05	7.05363e-05
co-occurence of coordinated regulators	Coordinated Regulator	Coordinated Regulator	unc-62	mab-5	M02185_2.00	M01240_2.00	AS	31	9.49177	3.26599	4.12147e-10	8.33433e-06	5.2473e-08
co-occurence of coordinated regulators	Coordinated Regulator	Coordinated Regulator	unc-62	gei-3	M02185_2.00	M00711_2.00	AS	27	6.63384	4.07004	1.05986e-10	0.0001672	2.82913e-06
co-occurence of coordinated regulators	Coordinated Regulator	Coordinated Regulator	unc-62	unc-3	M02185_2.00	OH2011_UNC-3	AS	27	3.9702	6.80066	1.80678e-15	3.59603e-05	0.00272698
co-occurence of coordinated regulators	Coordinated Regulator	Coordinated Regulator	unc-62	ztf-3	M02185_2.00	M00640_2.00	AS	30	6.52213	4.59973	3.52205e-13	7.91576e-06	1.07088e-05
co-occurence of coordinated regulators	Coordinated Regulator	Coordinated Regulator	unc-62	ztf-9	M02185_2.00	M00636_2.00	AS	27	5.18545	5.20688	5.9513e-13	7.7289e-06	1.10123e-05
co-occurence of coordinated regulators	Coordinated Regulator	Coordinated Regulator	unc-62	syd-9	M02185_2.00	M00646_2.00	AS	33	7.83063	4.21422	1.21563e-13	9.64096e-06	3.53932e-07
co-occurence of coordinated regulators	Coordinated Regulator	Coordinated Regulator	unc-62	ztf-11	M02185_2.00	M00650_2.00	AS	33	12.5401	2.63156	1.50811e-08	2.72423e-05	5.23396e-08
co-occurence of coordinated regulators	Coordinated Regulator	Coordinated Regulator	unc-62	elt-1	M02185_2.00	M08206_2.00	AS	26	6.33367	4.10504	2.25895e-10	9.48966e-06	6.74729e-07
co-occurence of coordinated regulators	Coordinated Regulator	Coordinated Regulator	ceh-18	vab-3	M00681_2.00	M00342_2.00	AS	31	10.6448	2.91222	5.76147e-09	1.67403e-07	0.00775037
co-occurence of coordinated regulators	Coordinated Regulator	Coordinated Regulator	ceh-18	lin-39	M00681_2.00	M08211_2.00	AS	35	11.7274	2.98447	1.43887e-10	7.59093e-08	0.000146334
co-occurence of coordinated regulators	Coordinated Regulator	Coordinated Regulator	ceh-18	ceh-13	M00681_2.00	M00450_2.00	AS	30	9.27056	3.23605	1.14408e-09	2.78883e-06	0.000835503
co-occurence of coordinated regulators	Coordinated Regulator	Coordinated Regulator	ceh-18	mab-5	M00681_2.00	M01240_2.00	AS	35	13.7018	2.55441	8.02116e-09	3.82297e-06	1.66833e-06
co-occurence of coordinated regulators	Coordinated Regulator	Coordinated Regulator	ceh-18	gei-3	M00681_2.00	M00711_2.00	AS	28	9.57626	2.9239	4.40123e-08	2.23665e-07	2.49594e-06
co-occurence of coordinated regulators	Coordinated Regulator	Coordinated Regulator	ceh-18	unc-3	M00681_2.00	OH2011_UNC-3	AS	28	5.73117	4.88556	7.81103e-13	1.04249e-07	0.00159907
co-occurence of coordinated regulators	Coordinated Regulator	Coordinated Regulator	ceh-18	ztf-3	M00681_2.00	M00640_2.00	AS	32	9.41499	3.39883	6.83339e-11	1.28907e-05	6.70542e-06
co-occurence of coordinated regulators	Coordinated Regulator	Coordinated Regulator	ceh-18	ztf-9	M00681_2.00	M00636_2.00	AS	29	7.48544	3.87419	4.81329e-11	2.21704e-06	0.000498313
co-occurence of coordinated regulators	Coordinated Regulator	Coordinated Regulator	ceh-18	syd-9	M00681_2.00	M00646_2.00	AS	36	11.3039	3.18475	1.08233e-11	7.08973e-07	1.73769e-05
co-occurence of coordinated regulators	Coordinated Regulator	Coordinated Regulator	ceh-18	ztf-11	M00681_2.00	M00650_2.00	AS	35	18.1022	1.93347	7.4463e-06	1.54923e-06	9.96479e-08
co-occurence of coordinated regulators	Coordinated Regulator	Coordinated Regulator	ceh-18	elt-1	M00681_2.00	M08206_2.00	AS	26	9.14295	2.84372	2.86989e-07	6.0885e-07	6.15797e-06
co-occurence of coordinated regulators	Coordinated Regulator	Coordinated Regulator	vab-3	lin-39	M00342_2.00	M08211_2.00	AS	31	9.59087	3.23224	5.25802e-10	0.000713236	0.000661158
co-occurence of coordinated regulators	Coordinated Regulator	Coordinated Regulator	vab-3	ceh-13	M00342_2.00	M00450_2.00	AS	31	7.58164	4.08882	2.03533e-12	0.00167714	0.000747014
co-occurence of coordinated regulators	Coordinated Regulator	Coordinated Regulator	vab-3	mab-5	M00342_2.00	M01240_2.00	AS	31	11.2056	2.76647	1.84833e-08	0.0023728	1.92737e-07
co-occurence of coordinated regulators	Coordinated Regulator	Coordinated Regulator	vab-3	gei-3	M00342_2.00	M00711_2.00	AS	27	7.83165	3.44755	3.23027e-09	0.00334779	1.54008e-05
co-occurence of coordinated regulators	Coordinated Regulator	Coordinated Regulator	vab-3	unc-3	M00342_2.00	OH2011_UNC-3	AS	25	4.68706	5.33383	3.41868e-12	0.000214936	0.000733308
co-occurence of coordinated regulators	Coordinated Regulator	Coordinated Regulator	vab-3	ztf-3	M00342_2.00	M00640_2.00	AS	30	7.69976	3.89622	1.67249e-11	0.00304258	2.18908e-06
co-occurence of coordinated regulators	Coordinated Regulator	Coordinated Regulator	vab-3	ztf-9	M00342_2.00	M00636_2.00	AS	28	6.12174	4.57387	3.3329e-12	0.00620958	1.17821e-05
co-occurence of coordinated regulators	Coordinated Regulator	Coordinated Regulator	vab-3	syd-9	M00342_2.00	M00646_2.00	AS	33	9.24453	3.56968	8.34199e-12	0.00207042	1.48925e-06
co-occurence of coordinated regulators	Coordinated Regulator	Coordinated Regulator	vab-3	ztf-11	M00342_2.00	M00650_2.00	AS	32	14.8043	2.16153	2.50244e-06	0.00411505	4.01024e-07
co-occurence of coordinated regulators	Coordinated Regulator	Coordinated Regulator	vab-3	elt-1	M00342_2.00	M08206_2.00	AS	26	7.47728	3.4772	6.01115e-09	0.000234453	5.77603e-06
co-occurence of coordinated regulators	Coordinated Regulator	Coordinated Regulator	lin-39	ceh-13	M08211_2.00	M00450_2.00	AS	30	8.35269	3.59166	1.07212e-10	0.000904917	4.09331e-05
co-occurence of coordinated regulators	Coordinated Regulator	Coordinated Regulator	lin-39	mab-5	M08211_2.00	M01240_2.00	AS	37	12.3452	2.99712	2.4023e-11	0.00239984	8.54531e-08
co-occurence of coordinated regulators	Coordinated Regulator	Coordinated Regulator	lin-39	gei-3	M08211_2.00	M00711_2.00	AS	28	8.62812	3.2452	5.10115e-09	0.000184013	5.34776e-06
co-occurence of coordinated regulators	Coordinated Regulator	Coordinated Regulator	lin-39	unc-3	M08211_2.00	OH2011_UNC-3	AS	28	5.16373	5.42243	7.77117e-14	4.31787e-06	0.00120636
co-occurence of coordinated regulators	Coordinated Regulator	Coordinated Regulator	lin-39	ztf-3	M08211_2.00	M00640_2.00	AS	33	8.48282	3.89021	9.45434e-13	0.000120134	8.09095e-06
co-occurence of coordinated regulators	Coordinated Regulator	Coordinated Regulator	lin-39	ztf-9	M08211_2.00	M00636_2.00	AS	29	6.74431	4.29992	4.71226e-12	0.000271714	3.03519e-05
co-occurence of coordinated regulators	Coordinated Regulator	Coordinated Regulator	lin-39	syd-9	M08211_2.00	M00646_2.00	AS	37	10.1847	3.6329	1.04126e-13	2.04383e-05	1.48925e-06
co-occurence of coordinated regulators	Coordinated Regulator	Coordinated Regulator	lin-39	ztf-11	M08211_2.00	M00650_2.00	AS	39	16.3099	2.39118	2.89469e-09	0.000608911	9.08383e-09
co-occurence of coordinated regulators	Coordinated Regulator	Coordinated Regulator	lin-39	elt-1	M08211_2.00	M08206_2.00	AS	28	8.23771	3.399	1.93965e-09	1.80658e-05	1.01039e-06
co-occurence of coordinated regulators	Coordinated Regulator	Coordinated Regulator	ceh-13	mab-5	M00450_2.00	M01240_2.00	AS	33	9.75895	3.38151	3.25637e-11	0.00262498	1.11465e-06
co-occurence of coordinated regulators	Coordinated Regulator	Coordinated Regulator	ceh-13	gei-3	M00450_2.00	M00711_2.00	AS	26	6.82058	3.81199	9.93341e-10	0.00258782	0.000117965
co-occurence of coordinated regulators	Coordinated Regulator	Coordinated Regulator	ceh-13	unc-3	M00450_2.00	OH2011_UNC-3	AS	24	4.08196	5.87953	1.60135e-12	0.00052617	0.00139048
co-occurence of coordinated regulators	Coordinated Regulator	Coordinated Regulator	ceh-13	ztf-3	M00450_2.00	M00640_2.00	AS	29	6.70572	4.32466	4.13944e-12	0.000225776	1.97256e-06
co-occurence of coordinated regulators	Coordinated Regulator	Coordinated Regulator	ceh-13	ztf-9	M00450_2.00	M00636_2.00	AS	27	5.33142	5.06432	1.07457e-12	0.000507178	1.23311e-05
co-occurence of coordinated regulators	Coordinated Regulator	Coordinated Regulator	ceh-13	syd-9	M00450_2.00	M00646_2.00	AS	32	8.05106	3.97463	1.49975e-12	0.000442493	7.50241e-07
co-occurence of coordinated regulators	Coordinated Regulator	Coordinated Regulator	ceh-13	ztf-11	M00450_2.00	M00650_2.00	AS	33	12.8931	2.55951	2.93161e-08	0.000533663	1.04366e-06
co-occurence of coordinated regulators	Coordinated Regulator	Coordinated Regulator	ceh-13	elt-1	M00450_2.00	M08206_2.00	AS	26	6.51196	3.99265	3.94665e-10	5.04896e-05	1.49726e-06
co-occurence of coordinated regulators	Coordinated Regulator	Coordinated Regulator	mab-5	gei-3	M01240_2.00	M00711_2.00	AS	30	10.0808	2.97597	7.3434e-09	1.85751e-05	0.00053241
co-occurence of coordinated regulators	Coordinated Regulator	Coordinated Regulator	mab-5	unc-3	M01240_2.00	OH2011_UNC-3	AS	28	6.0331	4.64106	2.41117e-12	2.75785e-07	0.00153413
co-occurence of coordinated regulators	Coordinated Regulator	Coordinated Regulator	mab-5	ztf-3	M01240_2.00	M00640_2.00	AS	32	9.911	3.22874	2.36637e-10	2.00699e-07	1.65042e-06
co-occurence of coordinated regulators	Coordinated Regulator	Coordinated Regulator	mab-5	ztf-9	M01240_2.00	M00636_2.00	AS	32	7.87979	4.06102	8.77581e-13	4.26289e-07	4.27782e-05
co-occurence of coordinated regulators	Coordinated Regulator	Coordinated Regulator	mab-5	syd-9	M01240_2.00	M00646_2.00	AS	37	11.8994	3.1094	8.58563e-12	1.59697e-06	3.09805e-07
co-occurence of coordinated regulators	Coordinated Regulator	Coordinated Regulator	mab-5	ztf-11	M01240_2.00	M00650_2.00	AS	43	19.0559	2.25652	8.77022e-10	2.08594e-06	8.21143e-07
co-occurence of coordinated regulators	Coordinated Regulator	Coordinated Regulator	mab-5	elt-1	M01240_2.00	M08206_2.00	AS	26	9.62462	2.70141	7.46431e-07	5.48343e-07	3.13725e-06
co-occurence of coordinated regulators	Coordinated Regulator	Coordinated Regulator	gei-3	unc-3	M00711_2.00	OH2011_UNC-3	AS	25	4.21656	5.929	4.16408e-13	3.03046e-05	0.00382684
co-occurence of coordinated regulators	Coordinated Regulator	Coordinated Regulator	gei-3	ztf-3	M00711_2.00	M00640_2.00	AS	28	6.92685	4.04224	4.82372e-11	2.08665e-05	1.00689e-05
co-occurence of coordinated regulators	Coordinated Regulator	Coordinated Regulator	gei-3	ztf-9	M00711_2.00	M00636_2.00	AS	26	5.50722	4.72107	1.35037e-11	5.82437e-05	0.000474606
co-occurence of coordinated regulators	Coordinated Regulator	Coordinated Regulator	gei-3	syd-9	M00711_2.00	M00646_2.00	AS	32	8.31655	3.84775	3.34219e-12	2.70951e-05	2.07983e-05
co-occurence of coordinated regulators	Coordinated Regulator	Coordinated Regulator	gei-3	ztf-11	M00711_2.00	M00650_2.00	AS	33	13.3182	2.47781	6.31099e-08	0.000591293	1.88593e-06
co-occurence of coordinated regulators	Coordinated Regulator	Coordinated Regulator	gei-3	elt-1	M00711_2.00	M08206_2.00	AS	24	6.7267	3.56787	1.80193e-08	1.21085e-05	5.4473e-05
co-occurence of coordinated regulators	Coordinated Regulator	Coordinated Regulator	unc-3	ztf-3	OH2011_UNC-3	M00640_2.00	AS	27	4.14556	6.513	4.60255e-15	0.000624289	1.66526e-05
co-occurence of coordinated regulators	Coordinated Regulator	Coordinated Regulator	unc-3	ztf-9	OH2011_UNC-3	M00636_2.00	AS	27	3.29595	8.19188	3.0721e-17	0.00206818	4.88961e-05
co-occurence of coordinated regulators	Coordinated Regulator	Coordinated Regulator	unc-3	syd-9	OH2011_UNC-3	M00646_2.00	AS	31	4.97726	6.22832	6.6259e-17	0.000492383	1.38993e-06
co-occurence of coordinated regulators	Coordinated Regulator	Coordinated Regulator	unc-3	ztf-11	OH2011_UNC-3	M00650_2.00	AS	30	7.97066	3.7638	3.7017e-11	0.00100569	1.04404e-08
co-occurence of coordinated regulators	Coordinated Regulator	Coordinated Regulator	unc-3	elt-1	OH2011_UNC-3	M08206_2.00	AS	23	4.02577	5.71319	8.73826e-12	0.00354764	2.05449e-06
co-occurence of coordinated regulators	Coordinated Regulator	Coordinated Regulator	ztf-3	ztf-9	M00640_2.00	M00636_2.00	AS	30	5.41448	5.5407	4.1177e-15	4.94345e-05	0.000441776
co-occurence of coordinated regulators	Coordinated Regulator	Coordinated Regulator	ztf-3	syd-9	M00640_2.00	M00646_2.00	AS	35	8.1765	4.28056	8.72769e-15	4.9306e-05	4.2853e-07
co-occurence of coordinated regulators	Coordinated Regulator	Coordinated Regulator	ztf-3	ztf-11	M00640_2.00	M00650_2.00	AS	35	13.094	2.67299	2.5219e-09	4.9306e-05	6.91142e-08
co-occurence of coordinated regulators	Coordinated Regulator	Coordinated Regulator	ztf-3	elt-1	M00640_2.00	M08206_2.00	AS	27	6.61342	4.08261	9.95409e-11	3.82573e-06	1.12808e-06
co-occurence of coordinated regulators	Coordinated Regulator	Coordinated Regulator	ztf-9	syd-9	M00636_2.00	M00646_2.00	AS	34	6.50077	5.23015	1.24924e-16	0.000163506	3.99466e-06
co-occurence of coordinated regulators	Coordinated Regulator	Coordinated Regulator	ztf-9	ztf-11	M00636_2.00	M00650_2.00	AS	35	10.4104	3.36202	6.22874e-12	0.000125279	6.68778e-08
co-occurence of coordinated regulators	Coordinated Regulator	Coordinated Regulator	ztf-9	elt-1	M00636_2.00	M08206_2.00	AS	23	5.25803	4.37426	1.09861e-09	4.02313e-05	7.28041e-06
co-occurence of coordinated regulators	Coordinated Regulator	Coordinated Regulator	syd-9	ztf-11	M00646_2.00	M00650_2.00	AS	43	15.7209	2.73521	1.72401e-12	2.04268e-05	6.10853e-08
co-occurence of coordinated regulators	Coordinated Regulator	Coordinated Regulator	syd-9	elt-1	M00646_2.00	M08206_2.00	AS	30	7.94024	3.77822	3.39764e-11	3.51169e-07	1.49984e-06
co-occurence of coordinated regulators	Coordinated Regulator	Coordinated Regulator	ztf-11	elt-1	M00650_2.00	M08206_2.00	AS	29	12.7156	2.28066	3.70486e-06	5.25407e-07	9.12141e-07
co-occurence of coordinated regulators	Coordinated Regulator	Coordinated Regulator	hlh-10	atf-5	M00930_2.00	M00593_2.00	ASE	55	18.2422	3.01499	1.42095e-13	0.00382303	0.00585313
co-occurence of coordinated regulators	Coordinated Regulator	Coordinated Regulator	hlh-10	ceh-38	M00930_2.00	M03716_2.00	ASE	61	29.2715	2.08394	7.46629e-09	0.000579748	0.000199469
co-occurence of coordinated regulators	Coordinated Regulator	Coordinated Regulator	hlh-10	ceh-48	M00930_2.00	M01905_2.00	ASE	68	29.0659	2.33951	5.26556e-12	0.000156242	0.0360592
co-occurence of coordinated regulators	Coordinated Regulator	Coordinated Regulator	hlh-10	ceh-58	M00930_2.00	M00676_2.00	ASE	63	19.6752	3.202	9.66332e-17	1.03129e-05	1.98147e-05
co-occurence of coordinated regulators	Coordinated Regulator	Coordinated Regulator	hlh-10	ceh-23	M00930_2.00	M00671_2.00	ASE	58	25.2345	2.29844	6.74059e-10	5.39928e-05	0.000347112
co-occurence of coordinated regulators	Coordinated Regulator	Coordinated Regulator	hlh-10	ceh-54	M00930_2.00	M02188_2.00	ASE	62	23.0984	2.68417	2.96481e-13	5.45213e-05	5.9912e-06
co-occurence of coordinated regulators	Coordinated Regulator	Coordinated Regulator	hlh-10	lim-6	M00930_2.00	M00432_2.00	ASE	56	15.7008	3.56669	1.18171e-16	0.000488018	0.00382443
co-occurence of coordinated regulators	Coordinated Regulator	Coordinated Regulator	hlh-10	dsc-1	M00930_2.00	M02063_2.00	ASE	51	14.7862	3.44917	1.17294e-14	0.000127935	0.00128054
co-occurence of coordinated regulators	Coordinated Regulator	Coordinated Regulator	hlh-10	ceh-36	M00930_2.00	M00673_2.00	ASE	59	13.9162	4.23965	9.84501e-21	0.00137741	2.09429e-05
co-occurence of coordinated regulators	Coordinated Regulator	Coordinated Regulator	hlh-10	fkh-8	M00930_2.00	M03026_2.00	ASE	65	19.7348	3.29368	7.43543e-18	0.000256248	0.000257591
co-occurence of coordinated regulators	Coordinated Regulator	Coordinated Regulator	hlh-10	daf-16	M00930_2.00	M01989_2.00	ASE	70	22.8243	3.06691	7.76593e-18	0.000105848	3.77973e-06
co-occurence of coordinated regulators	Coordinated Regulator	Coordinated Regulator	hlh-10	daf-19	M00930_2.00	M00709_2.00	ASE	47	12.0661	3.89521	2.70663e-15	0.00218923	5.48447e-05
co-occurence of coordinated regulators	Coordinated Regulator	Coordinated Regulator	hlh-10	ztf-3	M00930_2.00	M00640_2.00	ASE	60	20.0029	2.99956	9.28625e-15	0.000323683	3.26517e-05
co-occurence of coordinated regulators	Coordinated Regulator	Coordinated Regulator	hlh-10	lsy-27	M00930_2.00	M00624_2.00	ASE	61	21.2661	2.86841	3.28752e-14	0.00698847	3.42467e-06
co-occurence of coordinated regulators	Coordinated Regulator	Coordinated Regulator	hlh-10	ztf-9	M00930_2.00	M00636_2.00	ASE	50	15.9034	3.14398	5.67432e-13	0.000384406	0.00152845
co-occurence of coordinated regulators	Coordinated Regulator	Coordinated Regulator	hlh-10	die-1	M00930_2.00	M00610_2.00	ASE	83	51.4284	1.61389	3.8582e-07	0.000483263	2.21189e-11
co-occurence of coordinated regulators	Coordinated Regulator	Coordinated Regulator	hlh-10	syd-9	M00930_2.00	M00646_2.00	ASE	58	24.016	2.41506	1.12057e-10	0.00452088	1.05084e-07
co-occurence of coordinated regulators	Coordinated Regulator	Coordinated Regulator	hlh-10	che-1	M00930_2.00	OH2004_CHE-1	ASE	68	23.9236	2.84238	9.00916e-16	0.000779829	1.19061e-11
[truncated: 13,722 more rows]

## Sheet: 3C.Top2_master_reg_by_dataset
Table S3. Motif analysis stats from Brain Atlas reporter data. A. Brain Atlas single factor motif analysis results. B. Cofactor results. C. Agreement of top two regulators between datasets.
[truncated: 114 more rows]
