# Supplementary material for: In silico analysis of the transcriptional regulatory logic of neuronal identity specification throughout the C. elegans nervous system
Source: eLife. 2021 Jun 24;10:e64906. doi: 10.7554/eLife.64906 (PMC8225391; doi:10.7554/eLife.64906)
Supplement: Supplementary file 4. [file elife-64906-supp4.xlsx]

## Sheet: Sheet1
Supplementary Table 4. Strain information
Strain	Marker	neuron class scored	marker used for cell ID	Figure reference
Wild type	otEx7409[pgp-2prom::gfp]	AWA	neuropal (AWA: osm-9prom::cyoFP1, ocr-1prom::cyoFP1)	Figure 6
odr-7(ky4)			AWA position and axon projection
Wild type	otEx7410[ins-1prom::gfp]	AWA	neuropal (AWA: osm-9prom::cyoFP1, ocr-1prom::cyoFP1)	Figure 6
odr-7(ky4)			neuropal (AWA: osm-9prom::cyoFP1, ocr-1prom::cyoFP1)
Wild type	unc-17(ot907[unc-17::mKate2])	PVC	cho-1 fosmid::yfp	Figure 6
cfi-1(ot786)			otIs381[ric-19prom::gfp]
Wild type	otIs579[cho-1 fosmid:: mChopti]	PVC	otIs381[ric-19prom::gfp]	Figure 6
cfi-1(ot786)			otIs381[ric-19prom::gfp]
Wild type	RJP255 ynIs34(pflp-19::GFP)	URX	position	Figure 6
unc-86(n846)			position
Wild type	RJP279 rpIs7(pgcy-33::gfp, rol-6)	URX	position	Figure 6
unc-86(n846)			position
Wild type	otIs533[cho-1 fosmid:: yfp]	DVA	otIs533[cho-1 fosmid:: yfp]	Supp. Fig 5
fax-1(gm83)			otIs533[cho-1 fosmid:: yfp]
Wild type	ot907[unc-17 crispr::mKate2]	DVA	ot907[unc-17 crispr::mKate2]	Supp. Fig 5
fax-1(gm83)			ot907[unc-17 crispr::mKate2]
Wild type	otEx6320[glr-5fosmid::yfp]	DVA	neuropal (DVA: nlp-12prom::cyoFP1, nmr-1prom::cyoFP1)	Supp. Fig 5
fax-1(gm83)			neuropal (DVA: nlp-12prom::cyoFP1, nmr-1prom::cyoFP1)
